# Supplementary material for: Epidemiology, management and the associated burden of mental health illness, atopic and autoimmune conditions, and common infections in alopecia areata: protocol for an observational study series
Source: PubMed Central journal article supplement — BMJ Open. 2021 Nov 16;11(11):e045718. doi: 10.1136/bmjopen-2020-045718 (PMC8596050; doi:10.1136/bmjopen-2020-045718), 2021-11-16
Supplement: bmjopen-2020-045718.draft_revisions.pdf [file bmjopen-2020-045718.draft_revisions.pdf]

# BMJ Open

BMJ Open is committed to open peer review. As part of this commitment we make the peer review history of every article we publish publicly available.

When an article is published we post the peer reviewers' comments and the authors' responses online. We also post the versions of the paper that were used during peer review. These are the versions that the peer review comments apply to.

The versions of the paper that follow are the versions that were submitted during the peer review process. They are not the versions of record or the final published versions. They should not be cited or distributed as the published version of this manuscript.

BMJ Open is an open access journal and the full, final, typeset and author-corrected version of record of the manuscript is available on our site with no access controls, subscription charges or pay-per-view fees (<http://bmjopen.bmj.com>).

If you have any questions on BMJ Open's open peer review process please email [info.bmjopen@bmj.com](mailto:info.bmjopen@bmj.com)

# BMJ Open

**The epidemiology, management, and the associated burden of mental health illness, atopic and autoimmune conditions, and common infections in alopecia areata: Protocol for an observational study series**

|                               |                                                                                                                                                                                                                                                                                                                                                                                                                                                                                                                                                                                                                                                                                                                                                                                                        |
|-------------------------------|--------------------------------------------------------------------------------------------------------------------------------------------------------------------------------------------------------------------------------------------------------------------------------------------------------------------------------------------------------------------------------------------------------------------------------------------------------------------------------------------------------------------------------------------------------------------------------------------------------------------------------------------------------------------------------------------------------------------------------------------------------------------------------------------------------|
| Journal:                      | <i>BMJ Open</i>                                                                                                                                                                                                                                                                                                                                                                                                                                                                                                                                                                                                                                                                                                                                                                                        |
| Manuscript ID                 | bmjopen-2020-045718                                                                                                                                                                                                                                                                                                                                                                                                                                                                                                                                                                                                                                                                                                                                                                                    |
| Article Type:                 | Protocol                                                                                                                                                                                                                                                                                                                                                                                                                                                                                                                                                                                                                                                                                                                                                                                               |
| Date Submitted by the Author: | 12-Oct-2020                                                                                                                                                                                                                                                                                                                                                                                                                                                                                                                                                                                                                                                                                                                                                                                            |
| Complete List of Authors:     | <p>Harries, Matthew; Salford Royal NHS Foundation Trust, The Dermatology Centre<br/> Macbeth, Abby; Norfolk and Norwich University Hospitals NHS Foundation Trust, Department of Dermatology<br/> Holmes, Susan; Queen Elizabeth University Hospital, Alan Lyell Centre for Dermatology<br/> Thompson, Andrew; Cardiff University, South Wales Clinical Psychology Training Programme<br/> Chiu, Wing; Pfizer Ltd<br/> Gallardo, William; Pfizer Ltd<br/> Messenger, Andrew; Royal Hallamshire Hospital, Department of Dermatology<br/> Tziotzios, Christos; King's College London, St. John's Institute of Dermatology<br/> de Lusignan, Simon; University of Oxford, Nuffield Department of Primary Care Health Sciences; University of Surrey, Department of Clinical and Experimental Medicine</p> |
| Keywords:                     | EPIDEMIOLOGY, MENTAL HEALTH, DERMATOLOGY, IMMUNOLOGY, INFECTIOUS DISEASES, PRIMARY CARE                                                                                                                                                                                                                                                                                                                                                                                                                                                                                                                                                                                                                                                                                                                |
|                               |                                                                                                                                                                                                                                                                                                                                                                                                                                                                                                                                                                                                                                                                                                                                                                                                        |

SCHOLARONE™  
Manuscripts

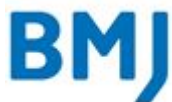

I, the Submitting Author has the right to grant and does grant on behalf of all authors of the Work (as defined in the below author licence), an exclusive licence and/or a non-exclusive licence for contributions from authors who are: i) UK Crown employees; ii) where BMJ has agreed a CC-BY licence shall apply, and/or iii) in accordance with the terms applicable for US Federal Government officers or employees acting as part of their official duties; on a worldwide, perpetual, irrevocable, royalty-free basis to BMJ Publishing Group Ltd ("BMJ") its licensees and where the relevant Journal is co-owned by BMJ to the co-owners of the Journal, to publish the Work in this journal and any other BMJ products and to exploit all rights, as set out in our [licence](#).

The Submitting Author accepts and understands that any supply made under these terms is made by BMJ to the Submitting Author unless you are acting as an employee on behalf of your employer or a postgraduate student of an affiliated institution which is paying any applicable article publishing charge ("APC") for Open Access articles. Where the Submitting Author wishes to make the Work available on an Open Access basis (and intends to pay the relevant APC), the terms of reuse of such Open Access shall be governed by a Creative Commons licence – details of these licences and which [Creative Commons](#) licence will apply to this Work are set out in our licence referred to above.

Other than as permitted in any relevant BMJ Author's Self Archiving Policies, I confirm this Work has not been accepted for publication elsewhere, is not being considered for publication elsewhere and does not duplicate material already published. I confirm all authors consent to publication of this Work and authorise the granting of this licence.

1  
2  
3  
4  
5  
6  
7  
8  
9  
10  
11  
12  
13  
14  
15  
16  
17  
18  
19  
20  
21  
22  
23  
24  
25  
26  
27  
28  
29  
30  
31  
32  
33  
34  
35  
36  
37  
38  
39  
40  
41  
42  
43  
44  
45  
46  
47  
48  
49  
50  
51  
52  
53  
54  
55  
56  
57  
58  
59  
60

# The epidemiology, management, and the associated burden of mental health illness, atopic and autoimmune conditions, and common infections in alopecia areata: Protocol for an observational study series

## Authors:

Dr Matthew Harries<sup>1</sup>, Dr Abby E. Macbeth<sup>2</sup>, Dr Susan Holmes<sup>3</sup>, Professor Andrew R Thompson<sup>4</sup>, Dr Wing Sin Chiu<sup>5</sup>, Dr William Romero Gallardo<sup>5</sup>, Professor Andrew G Messenger<sup>6</sup>, Dr Christos Tziotzios<sup>7</sup>, Professor Simon de Lusignan<sup>8\*</sup>

## Author Affiliations:

1. The Dermatology Centre, Salford Royal NHS Foundation Trust, Salford, Greater Manchester, UK; Centre for Dermatology Research, University of Manchester, MAHSC and NIHR Manchester Biomedical Research Centre, Manchester, UK
2. Department of Dermatology, Norfolk & Norwich University Hospitals NHS Foundation Trust, Norwich, UK
3. Alan Lyell Centre for Dermatology, Queen Elizabeth University Hospital, Glasgow, UK
4. South Wales Clinical Psychology Training Programme, Department of Psychology, Cardiff University, 11th Floor, Tower Building, 70 Park Place Cardiff, CF10 3AT, Wales
5. Pfizer Ltd, Walton Oaks, Walton on the Hill, Tadworth, Surrey, UK
6. Department of Dermatology, Royal Hallamshire Hospital, Sheffield, S10 2JF, UK
7. St. John's Institute of Dermatology, King's College London, London, Guy's Hospital, London, SE1 9RT, UK
8. Nuffield Department of Primary Care health Sciences, University of Oxford, UK; Royal College of General Practitioners, Research and Surveillance Centre, London, UK

\* Corresponding author: [simon.delusignan@phc.ox.ac.uk](mailto:simon.delusignan@phc.ox.ac.uk)

**Word count:** 4,224



## Abstract

### Introduction:

Alopecia Areata (AA) is a common cause of immune-mediated non-scarring hair loss. Links between AA and common mental health, autoimmune and atopic conditions, and common infections have previously been described but remain incompletely elucidated and contemporary descriptions of the epidemiology of AA in the UK are lacking.

### Methods and analysis:

Retrospective study series using a large population-based cohort (5.2 million) from the Oxford-Royal College of General Practitioners (RCGP) Research and Surveillance Centre (RSC) database, exploring four themes: AA epidemiology, mental health comorbidities, autoimmune/atopic associations and common infections.

In the epidemiology theme, we will describe the incidence and prevalence of AA overall and by age, sex, and sociodemographic factors. Healthcare utilisation (primary care visits and secondary care referrals) and treatments for AA will also be assessed. In the mental health theme, we will describe the prevalence and incidence of mental-health conditions (anxiety, depressive episodes, recurrent depressive disorder, adjustment disorder, agoraphobia, self-harm, and parasuicide) in people with AA compared with matched controls. We will also explore mental health treatment patterns (medication and psychological interventions), time off work and unemployment rates. Within the

1  
2  
3 autoimmune/atopic associations theme, we will examine the prevalence of atopic  
4  
5 (atopic dermatitis, allergic rhinitis, and asthma), psoriasis, and autoimmune  
6  
7 conditions (Crohn's disease, ulcerative colitis, coeliac disease, type 1 diabetes,  
8  
9 Hashimoto's thyroiditis, Grave's disease, rheumatoid arthritis, psoriatic arthritis,  
10  
11 ankylosing spondylitis, systemic lupus erythematosus, polymyalgia rheumatica,  
12  
13 Sjögren's syndrome, vitiligo, multiple sclerosis, and pernicious anaemia) in people  
14  
15 with AA compared with matched controls. We will also estimate the incidence of  
16  
17 new onset atopic and autoimmune conditions after AA diagnosis. Within the  
18  
19 common infections theme, we will examine the incidence of common infections  
20  
21 (respiratory Tract Infection, pneumonia, acute bronchitis, influenza, skin infection,  
22  
23 urinary tract infection, genital infections, gastrointestinal infection, herpes  
24  
25 simplex, herpes zoster, meningitis, COVID-19) in people with AA compared with  
26  
27 matched controls.  
28  
29  
30  
31  
32  
33  
34  
35

36 **Study Registration:** ClinicalTrials.gov observational study identifier

37  
38 NCT04239521  
39  
40  
41  
42  
43  
44  
45  
46  
47  
48  
49  
50  
51  
52  
53  
54  
55  
56  
57  
58  
59  
60

## Strengths and limitations of this study

- We will use a nationally representative primary care database of over 5.2 million people to explore the epidemiology of alopecia areata (AA), as well as associations of AA with mental health conditions, autoimmune and atopic conditions, and common infections.
- As national guidelines recommend initial assessment and management of AA is undertaken in primary care, this study will provide an accurate contemporary analysis of AA epidemiology in England in both children and adults.
- The Oxford-RCGP-RSC primary care dataset has a high level of completeness on sociodemographic and geographic data and therefore enables an assessment of variation in the incidence and prevalence of AA across England.
- Oxford-RCGP-RSC is the primary infectious disease sentinel network for the UK; the common infections to be explored are all regularly monitored conditions within the network.
- A limitation of the study is that a validated case definition of AA is not available for primary care databases; this will be mitigated by additional analysis to explore the sensitivity of findings when non-specific alopecia diagnostic codes (e.g. unspecified alopecia) are included.

### Key words:

Alopecia areata, epidemiology, incidence, prevalence, common mental health conditions, depression, anxiety, autoimmune disease, atopic conditions, study protocol, common infections.

## Introduction

Alopecia areata (AA) is a common cause of immune-mediated, non-scarring hair loss.(1) Clinical presentations of AA are heterogeneous, ranging from well-demarcated patches of hair loss on the scalp to total loss of hair on the scalp (*alopecia areata totalis*) or entire scalp and body (*alopecia areata universalis*). (2) Active AA is estimated to affect approximately 0.1-0.2% (2, 3) of the population worldwide, with a lifetime risk of 1.0-2.1%. (4-6)

Following the initial episode, the majority of those with limited patchy AA will experience spontaneous remission, but over 80% will have subsequent relapses. (7) Spontaneous remission has been reported to occur in less than 10% of those with extensive AA. (7) A number of treatment options can induce hair growth in people with AA, but none have been shown to have a durable impact on remission. (8)

AA has been associated with a number of autoimmune conditions, supporting the theory of an underlying autoimmune aetiology. (9) Atopic conditions and mental health disorders have also been demonstrated to be more common in people with AA, (9-11) although the temporal relationship between psychiatric conditions and AA remains poorly researched. (12) The association between AA and common infections is not well studied.

This study series, using a large contemporary population-based sample aims to explore and describe many important elements of AA over four key areas: i) the

1  
2  
3 current epidemiology of AA; ii) the prevalence and incidence of psychiatric co-  
4 morbidity in people with AA; iii) the prevalence and incidence of autoimmune  
5 and atopic conditions in people with AA; iv) the incidence of common infections in  
6 people with AA.  
7  
8  
9  
10  
11  
12  
13  
14

## 15 Current knowledge

### 16 Epidemiology

17  
18  
19  
20  
21  
22 Population studies in the USA using the Rochester Epidemiology Project database  
23 estimate the lifetime risk of AA to be 2.1%.<sup>(4)</sup> The database contained information  
24 from all patients registered with a healthcare provider in Olmsted County,  
25 Minnesota from 1990-2009. Previous studies using this database from 1971-1974  
26 estimated the overall prevalence of AA to be 0.1-0.2%,<sup>(13)</sup> with no published  
27 studies reporting prevalence estimates since this. Other epidemiological studies  
28 have assessed the incidence of AA in patients referred to dermatology services.  
29 Clinic-based studies from around the world have estimated the incidence of AA to  
30 be in the region of 0.57-3.8%.<sup>(14-18)</sup>  
31  
32  
33  
34  
35  
36  
37  
38  
39  
40  
41  
42  
43  
44  
45

46 Worldwide, the majority of studies on AA have not found a significant difference in  
47 incidence between males and females.<sup>(5)</sup> AA onset occurs before the age of 40 in  
48 82-86% of cases.<sup>(5)</sup> To date, there have been no large population-based studies of  
49 AA epidemiology in UK populations.  
50  
51  
52  
53  
54  
55  
56  
57  
58  
59  
60

## Mental Health Comorbidities

It is well-recognised by clinical experts in AA that the condition can have a profound psychological impact and a possible comorbid burden of mental health conditions. A recent USA cross-sectional database study comparing 5,605 patients with AA with matched controls found a higher prevalence of mental health diagnoses in the AA group (32.8% vs 20.0%).(19) In particular, higher rates of depression (OR 2.18, 95%CI 1.80-2.63), anxiety disorders (OR 2.46, 95%CI 1.91-3.16), attention-deficit disorders (OR 8.11, 95%CI 5.22-12.59), adjustment disorders (OR 4.80, 95%CI 2.58-8.91) and obsessive compulsive disorders (OR 4.95, 95%CI 1.59-15.35) were observed when compared with controls.(19) These findings concur with previous work and a similar pattern is seen in other countries.(20-23)

Recently a British study identified a bi-directional positive association between major depressive disorder and AA.(24) In a sample of over 400,000 participants, major depressive disorder was seen to increase the risk of incident AA by 90% [HR 1.90, 95%CI 1.67-2.15] and AA was found to increase the risk of incident major depressive disorder by 34% [HR 1.34, 95%CI 1.23-1.46].(24) The association of other common mental health conditions with AA however was not assessed.

## Autoimmune and atopic comorbidities

A central theory in AA pathogenesis is that it is an autoimmune phenomenon resulting from a disruption of hair follicle 'immune privilege', where numerous

1  
2  
3 immunological mechanisms fail to prevent cytotoxic immune attack on cells and  
4 antigens present at that site.(25)  
5  
6  
7  
8  
9

10 A number of studies have reported autoimmune conditions to occur more  
11 frequently in those with AA than in the general population, however results are  
12 conflicting and studies have been limited by potential recruiting, recall and  
13 reporting biases.(26) A Taiwanese retrospective cohort study found individuals  
14 with AA to have an overall increased risk of developing an autoimmune condition  
15 when compared with matched controls (HR 1.86, 95%CI 1.32-2.63). In particular,  
16 greater risks of incident systemic lupus erythematosus (SLE) (HR 5.02; 95%CI  
17 2.08-12.51), psoriasis (HR 2.01; 95%CI 1.06-3.83) and rheumatoid arthritis (RA)  
18 (HR 1.79; 95%CI 1.07-3.00) were observed.(27) There was no relationship  
19 between AA and Hashimoto's thyroiditis or type 1 diabetes (T1DM). A recent  
20 systematic review and meta-analysis found AA to be significantly associated with  
21 Graves' Disease (OR 2.07, 95%CI 1.80-2.38) and Hashimoto's Thyroiditis (OR 2.15;  
22 95%CI 1.71-2.72) but not with SLE, RA, Psoriasis or T1DM.(9)  
23  
24  
25  
26  
27  
28  
29  
30  
31  
32  
33  
34  
35  
36  
37  
38  
39  
40  
41  
42

43 There has also been interest in the prevalence of co-morbid atopy in patients with  
44 AA. The prevalence of atopy in patients with AA has been reported to be in the  
45 range of 11-38.2%(5) representing cohorts from the USA, India and Singapore .(11,  
46 14, 28, 29) A large meta-analysis found patients with AA had higher odds of having  
47 atopic dermatitis (OR 2.36; 95%CI 1.80-3.09) or allergic rhinitis (OR 1.33;95%CI  
48 1.19-1.47) when compared with controls.(9) It is not however surprising from a  
49 pathogenesis perspective in terms of shared pathways of autoimmune  
50 susceptibility; IL-13 loci have been associated with autoimmune and atopic  
51  
52  
53  
54  
55  
56  
57  
58  
59  
60

1  
2  
3 conditions, and a genome-wide association study established that IL-13 is also  
4 susceptible loci for AA. (30)  
5  
6  
7  
8  
9

## 10 Common infections

11  
12  
13 It has been hypothesized that infections may act as triggers for AA; with particular  
14 interest in *Helicobacter pylori*, cytomegalovirus, Epstein-Barr virus, hepatitis B  
15 virus, hepatitis C virus, and human immunodeficiency virus but others have also  
16 been suggested.(9, 31-38) Some case reports have suggested improvement or  
17 resolution of AA with treatment of the associated infection.(33, 39). However, early  
18 small-scale studies have failed to find convincing evidence to support  
19 associations.(35, 36, 40)  
20  
21  
22  
23  
24  
25  
26  
27  
28  
29

30 Multiple genetic loci have been identified to be both protective from infection but  
31 increase the risk for autoimmune disease.(41) Examples include the HLA variants  
32 HLA-DQ2 and HLA-DQ8 which confer protection against viral infections including  
33 influenza but are associated with inflammatory bowel disease,(42, 43) and SH2B3  
34 rs3184504\*A gene variant protective against *Escherichia coli* infection but also  
35 detrimental for inflammatory bowel disease.(44) These loci which, in the past have  
36 conferred a genetic advantage, may still confer a reduced infection risk.(41) It is  
37 currently unclear if the genetic predisposition for AA is caused by genetic factors  
38 which also confer protection against any common infections. In other autoimmune  
39 conditions infection risk is often increased as a result of the pathological changes  
40 resulting from the condition itself, the effects of immune-modulatory treatment, or  
41 through increased exposure to pathogens through healthcare contact.(45-51) An  
42 understanding of the relative infection rates in people with AA compared to those  
43  
44  
45  
46  
47  
48  
49  
50  
51  
52  
53  
54  
55  
56  
57  
58  
59  
60



1  
2  
3 without is of particular importance with the emergence of Janus kinase inhibitors  
4  
5 as a potential treatment option.(52) Whilst this medication class can produce  
6  
7 impressive hair regrowth results even in long-standing AA their use is associated  
8  
9 with some increased infection risk; in particular, urinary tract infections, viral  
10  
11 gastroenteritis fungal infections, and varicella zoster infection.(52)  
12  
13  
14  
15  
16  
17  
18  
19  
20  
21  
22  
23  
24  
25  
26  
27  
28  
29  
30  
31  
32  
33  
34  
35  
36  
37  
38  
39  
40  
41  
42  
43  
44  
45  
46  
47  
48  
49  
50  
51  
52  
53  
54  
55  
56  
57  
58  
59  
60

For peer review only

## Aims and Objectives

We aim to perform a series of retrospective studies using a large population-based cohort in England, over a decade (1<sup>st</sup> January 2009 to 1<sup>st</sup> January 2019) exploring AA in four theme areas: epidemiology, mental health, autoimmune and atopic comorbidities and common infections.

Within the epidemiology theme, our initial objective is to provide a complete description of the incidence and prevalence of AA in England. We will explore the influence of socio-demographic and geographic factors on disease incidence and describe the current service utilisation and management patterns in AA during the year after diagnosis.

Within the mental health theme, we will explore the disease burden of common mental health conditions in people with AA compared with matched controls. We will calculate the prevalence of disease at AA diagnosis, the incidence of disease in the first two years after diagnosis and the influence of socio-demographic factors on the prevalence of common mental health conditions in AA. We will describe the mental health treatment burden in people (medication and psychological service use) with AA and depression and anxiety. We will also explore potential associations between AA and both time off work and unemployment.

Within the autoimmune and atopic comorbidities theme, we will examine the prevalence of atopic and autoimmune conditions at AA diagnosis, and the incidence

1  
2  
3 of new onset atopic and autoimmune conditions in the first five years after  
4 diagnosis in people with AA compared with matched controls.  
5  
6  
7  
8  
9

10 Within the common infections theme, we will examine the incidence of multiple  
11 common infections in the first five years after diagnosis in people with AA  
12 compared with matched controls.  
13  
14  
15  
16  
17

18  
19 The primary and secondary objects of each study theme are formally described in  
20 the Statistical Analysis Plan (Additional file 1).  
21  
22  
23  
24  
25  
26  
27  
28  
29  
30  
31  
32  
33  
34  
35  
36  
37  
38  
39  
40  
41  
42  
43  
44  
45  
46  
47  
48  
49  
50  
51  
52  
53  
54  
55  
56  
57  
58  
59  
60

## Methods and analysis

### Data source

These studies will use routinely collected and collated data from the Oxford-Royal College of General Practitioners (RCGP) Research and Surveillance Centre (RSC) database to provide a broadly representative sample of the population of England. The RCGP RSC incorporates pseudonymised primary care records from over 200 GP practices distributed across England. Details of the cohort included in the database have been published previously.<sup>(53)</sup> At the current time, the database contains data from 2.6 million actively registered people and the historic records of up to 5.2 million people over the last 20 years.

The RCGP RSC database includes patient demographics, diagnoses, laboratory test results, primary care issued prescriptions and processes of care such as clinic visits and specialist referrals. These data are coded using the Read code system. UK general practice records provide several advantages for this study type; UK primary care is a registration-based system (a patient can only register with a single GP), records have been computerised since the 1990s, and pay-for-performance targets (introduced in 2004 through The Quality and Outcomes Framework; QOF) have resulted in consistent high-quality clinical data entry about chronic disease.<sup>(54, 55)</sup> Studies in many chronic diseases such as atopic dermatitis, rheumatoid arthritis, diabetes, inflammatory bowel disease, and chronic obstructive pulmonary disease have been published using RCGP RSC data.<sup>(51, 56-59)</sup> RCGP RSC practices get feedback on their data quality, with a particular

1  
2  
3 emphasis on “episode typing” – designating cases first, new, or ongoing, which  
4  
5 helps differentiate incidence from prevalence.(60)  
6  
7  
8  
9

## 10 Study design

11  
12  
13  
14 Within RCGP RSC, people with and without AA will be identified using Read  
15  
16 diagnostic codes. A range of study designs will be used across the studies and  
17  
18 include; repeated cross-sectional design (epidemiology of AA), case-control design  
19  
20 (the prevalence of common mental health conditions, atopic and autoimmune  
21  
22 conditions, and common infections at AA diagnosis), and matched-cohort design  
23  
24 (the incidence of common mental health conditions, atopic and autoimmune  
25  
26 conditions, and common infections after AA diagnosis).  
27  
28  
29  
30  
31  
32

## 33 Alopecia areata case detection

34  
35  
36 We will identify cases of AA using specific diagnostic codes (Supplementary Table  
37  
38 S1.1, Additional file 2). Confirmed AA will be defined as one or more AA code and  
39  
40 no alternative diagnostic code in the subsequent 365 days (alternative diagnoses  
41  
42 are defined in Supplementary Table S1.1, Additional file 2).  
43  
44  
45  
46  
47

48 For sensitivity analyses we will also extract alopecia recorded where the type has  
49  
50 not been specified (Supplementary Table S1.1, Additional file 2) and alopecia  
51  
52 extent if recorded (Supplementary Table S1.2, Additional file 2).  
53  
54  
55  
56  
57  
58  
59  
60

## Study 1: Epidemiology of alopecia areata

### *The incidence and lifetime prevalence of alopecia areata*

We will describe the incidence and point prevalence of AA over 2009-2018 inclusive, by age group, sex, ethnicity, and socioeconomic status, and geographical region. Ethnicity will be categorised as follows based on UK census categories: White, Asian, Black African/Caribbean, Mixed, and Other.(61) Index of multiple deprivation (IMD) will be used as a measure of socioeconomic status.(62)

### *Service utilisation in people with alopecia areata*

We will assess primary care visit frequency, up to one year, in people newly diagnosed with AA compared to matched controls without AA. Measures of healthcare management will also be assessed in people newly diagnosed with AA up to one year, comprising; secondary care dermatology referrals (Supplementary Table S1.3, Additional file 2) and primary care prescriptions for AA treatments (Supplementary Table S1.4, Additional file 2).

## Study 2: Mental Health conditions in people with alopecia areata

We will assess the prevalence and incidence of three common mental conditions as defined by the International Statistical Classification of Diseases and Related Health Problems 10th Revision (ICD10) classification; depressive episodes (F32), recurrent depressive disorder (F33), and non-phobia related anxiety disorders (F41). These conditions have been chosen as they represent the most common mental health conditions presenting to primary care.(63) Conditions will be

1  
2  
3 identified using algorithms validated in UK primary care. We selected the  
4 algorithms to be used in the study to optimise the positive predictive value of case  
5 identification. In brief, we will use a concurrent diagnosis and treatment code to  
6 identify acute depression episodes and for recurrent depressive disorder either a  
7 historical code for any depression and current treatment or a recurrent depressive  
8 disorder specific diagnosis code (Supplementary Tables S2.1, S2.2 and S2.3,  
9 Additional file 2). Anxiety disorder will be identified using a concurrent diagnosis  
10 of an anxiety episode and treatment code (Supplementary Table S2.4, Additional  
11 file 2).

12  
13  
14  
15  
16  
17  
18  
19  
20  
21  
22  
23  
24  
25  
26  
27 To assess prevalence, we will perform a case-control analysis to compare the  
28 prevalence of mental health conditions between people newly diagnosed with AA  
29 and controls. To assess incidence, we will perform a matched cohort analysis in the  
30 subset of cases and controls free of the mental health conditions of interest at  
31 baseline. In addition, we will examine the prevalence and incidence of other mental  
32 health conditions; adjustment disorder, agoraphobia, self-harm, and  
33 overdose/parasuicide attempts (Supplementary Tables S2.5–S2.9, Additional file  
34 2).

35  
36  
37  
38  
39  
40  
41  
42  
43  
44  
45  
46  
47  
48 We will determine the treatment burden of mental health medications in AA  
49 (selective serotonin reuptake inhibitors, serotonin and norepinephrine reuptake  
50 inhibitors, tricyclic antidepressants, tetracyclic antidepressants, and monoamine  
51 oxidase inhibitors, anxiolytic medications) and psychological intervention (referral  
52 rates for counselling, secondary care psychiatrist referrals, including the referrals  
53 to the clinical psychology services/specialists and UK Improving Access to  
54  
55  
56  
57  
58  
59  
60

1  
2  
3 Psychological Therapies (IAPT) program. (Supplementary Table S2.10, Additional  
4 file 2)).  
5  
6

7  
8 We will also assess unemployment and time off work in people of working age (18-  
9 64). Unemployment will be identified using codes relating to unemployment  
10 recorded in the clinical record or the issuing of IB113 or ESA113 form  
11 (Supplementary Table S3.1, Additional file 2). These forms are completed by GPs  
12 when their patients are accessing incapacity benefits (historically) or employment  
13 and support allowance (current) because of a disability or health condition  
14 affecting their ability to work. Time off work will be assessed by reporting the rates  
15 of issue of Med 3 (Statement of Fitness for Work) certification from primary care  
16 (Supplementary Table S3.2, Additional file 2). These “fit notes” are required by  
17 employers when employees have periods of absence from work for sickness lasting  
18 longer than seven days.  
19  
20  
21  
22  
23  
24  
25  
26  
27  
28  
29  
30  
31  
32  
33  
34  
35

### 36 **Study 3: Autoimmune and atopic comorbidities in alopecia areata**

37

38  
39 We will assess the prevalence and incidence of autoimmune and atopic conditions  
40 as listed in Table 1 and defined in Supplementary Tables S4, Additional file 2, in  
41 people with AA. To assess prevalence, we will perform a case-control study to  
42 compare the prevalence of these conditions between cases and controls. To assess  
43 incidence, we will perform a matched cohort study to compare the incidence of new  
44 autoimmune and atopic conditions in the same cases and controls after the point  
45 of matching. Autoimmune and atopic conditions were included if prevalence has  
46 been reported to be 0.3% or greater.<sup>(9, 64-67)</sup> This cut-off was based on power  
47 calculations suggesting this is minimum background prevalence required to detect  
48  
49  
50  
51  
52  
53  
54  
55  
56  
57  
58  
59  
60



1  
2  
3 a 2-fold difference in prevalence (Additional file 1). Excluded autoimmune  
4 conditions due to low prevalence are Addison's disease, autoimmune haemolytic  
5 anaemia, immune thrombocytopenic purpura, autoimmune hepatitis, systemic  
6 sclerosis, myasthenia gravis, and systemic vasculitides.  
7  
8  
9  
10  
11

#### 12 **Study 4: common infections in alopecia areata**

13  
14  
15 We will assess the incidence of common infections in people with AA using a  
16 matched cohort study to compare the incidence of common infections in cases and  
17 controls. The common infections to be examined are listed in Table 2 and defined  
18 in Supplementary Tables S5, Additional file 2.  
19  
20  
21  
22  
23  
24

#### 25 **Statistical methods**

26  
27  
28 The full statistical analysis plan is provided in Additional file 1. Briefly, for Study 1,  
29 AA prevalence will be calculated by dividing the number of AA cases by the total  
30 number of eligible people in the study population. Point prevalence will be  
31 reported for the cohort overall and stratified by sex and age. AA incidence will be  
32 calculated by dividing the total number of new AA cases by the total person-years  
33 of follow-up. Incidence rates will be stratified by calendar year, socio-demographic  
34 factors (age group, sex, ethnicity, rural/urban classification and socioeconomic  
35 status) and geographical region. Adjusted incidence rates will be estimated using  
36 Poisson regression.  
37  
38  
39  
40  
41  
42  
43  
44  
45  
46  
47  
48  
49  
50  
51

52 Service utilisation (Study 1 and 2) will be evaluated by calculation of annual  
53 primary care attendance rates, treatment rates (prescriptions per person per year),  
54 and the total proportion of people with one or more referral for additional services  
55 (dermatology review [Study 1], psychiatrist referral and counselling [Study 2]).  
56  
57  
58  
59  
60

1  
2  
3  
4  
5 For studies 1 (for comparison of primary care visit frequency only), 2 and 3,  
6 matching will be performed as follows: control cohorts will be defined by matching  
7 cases with people without a diagnosis of AA or other alopecia. The follow-up period  
8 for each matched control will begin at the start of follow-up of their matched case.  
9  
10 Each case will be nearest neighbour matched with four controls by age and sex  
11 within GP practices. After matching, if there are substantial differences in  
12 socioeconomic status between cases and controls, re-matching with IMD as an  
13 additional matching criterion will be considered. Study 4 will use the same nearest  
14 neighbour matching process but cases will be defined as people diagnosed with AA  
15 on or before 1<sup>st</sup> January 2014, people who develop AA during follow up will be  
16 excluded from the pool of available controls prior to matching.  
17  
18  
19  
20  
21  
22  
23  
24  
25  
26  
27  
28  
29  
30  
31  
32  
33

34 For Study 2, we will report the prevalence of mental health conditions by socio-  
35 demographic subgroups in cases and controls. The burden of treatment for mental  
36 health conditions will be estimated as the total proportion of people prescribed  
37 each treatment within one year after the study start. The burden of sick days will  
38 be estimated as the total proportion of people issued a Med 3 certificate. To assess  
39 differences in incident mental health conditions in the two years after the study  
40 start, we will use adjusted Cox regression stratified by case/control status. Study 3  
41 (atopic and autoimmune conditions) will similarly compare baseline disease  
42 prevalence in cases and controls, and compare incidence of new onset conditions  
43 in the five years after the study start using adjusted Cox regression.  
44  
45  
46  
47  
48  
49  
50  
51  
52  
53  
54  
55  
56  
57  
58  
59  
60

1  
2  
3 Study 4 will compare infection incidence in cases and controls up to five years.  
4  
5 Infection incidence rates will be estimated by dividing the number of incident  
6  
7 common infections by total person-years of follow-up. Adjusted Poisson regression  
8  
9 will be used to estimate the association between AA and rates of common infection.  
10  
11  
12  
13  
14

### 15 *Sensitivity analyses*

16  
17  
18 We will compare prevalence (Studies 2-3) and incidence (Studies 2-4) of the study  
19  
20 outcomes in people with non-specific alopecia codes only (i.e. no prior or  
21  
22 subsequent codes specifying alopecia type).  
23  
24

25 In Study 4, we will use a Cox regression to estimate time to first infection. We will  
26  
27 also compare the results of the study outcomes when 1) people who develop AA  
28  
29 during the follow up are included as cases and 2) when we perform matching using  
30  
31 the time of AA diagnosis and follow for up to five years after diagnosis (or matched  
32  
33 date for controls).  
34  
35  
36  
37  
38  
39

### 40 **Data management**

41  
42 Individual patient data will be anonymised at the point of data extraction. All data  
43  
44 will remain in anonymised form and will be held on a secure server at the  
45  
46 University of Surrey. All statistical analyses will be performed using R software.  
47  
48  
49  
50  
51  
52  
53  
54  
55  
56  
57  
58  
59  
60

## Discussion

### Clinical Implications

Results derived from this study will be useful in monitoring trends in the incidence of AA in England and may identify factors that influence the disease distribution and treatment patterns. Furthermore, obtaining an accurate picture of the state of AA in the UK will help inform Health Needs Assessments and policy development.

A greater understanding of the prevalence of mental health conditions associated with AA and the directionality of these relationships may help with the development of psychological interventions in AA, as the approach required would likely differ if the symptoms patients are experiencing are pervasive or reactive to an episode of hair loss.(12, 68)

Awareness of AA as a potential risk factor or associated comorbidity for certain autoimmune and atopic conditions may help reduce delays in diagnosis for these conditions and increase vigilance of GPs and dermatologists when reviewing their patients with AA in detecting co-existent conditions. Future work may focus upon whether improved control of an underlying autoimmune or atopic condition may improve chances of achieving remission in AA.

Finally, analysing associations between AA and common infections may provide evidence to support the prescribing of immune modulating medications for the treatment of AA.

## Strengths and limitations of the research methods

Several strengths of our study design are noteworthy. Only two previous studies on the incidence and prevalence of AA have been population-based, with the vast majority being conducted on clinic patients and thus leading to skewed prevalence estimates. This study will also provide a contemporary picture of the burden of AA, as the previous population-based studies were over 20 years ago, and this will be the first AA epidemiology study conducted in the UK. To our knowledge, our study examining common infections will be the first study to attempt to answer the question of whether AA confers protection or increased risk for common infections. A final key strength of this study is the use of the national infections surveillance network to analyse infection risk; with regular feedback to practices with a focus on the quality of infections recording the quality of recording of these infection events higher in this network than other data sources.

An ontological approach to detecting cases of AA and associated comorbidities will improve accuracy compared to the use of diagnostic codes alone.<sup>(69)</sup> Exclusion of individuals with potentially confounding conditions (i.e. other causes of hair loss) will also improve the accuracy of our estimates. The algorithms used to detect common mental health conditions have been previously validated in UK primary care. The completeness of GP data coding for prescriptions, referrals and issue of Med 3 certificates will ensure that our findings on AA and comorbidity management are robust and reliable, and the “episode typing” functionality of the RCGP RSC database will ensure incident and prevalent cases are appropriately assigned. The RCGP RSC database has been shown to be a representative sample of

1  
2  
3 the UK population (53) and hence our results are broadly generalisable to the UK  
4  
5 as a whole but should not be extended to populations which are dissimilar.  
6  
7  
8  
9

10 There are also several limitations of the study design that are worthy of  
11  
12 consideration. This study does not attempt to detect cases of AA (or the  
13  
14 comorbidities of interest) that do not present to medical attention and hence may  
15  
16 underestimate the true burden of disease. Furthermore, only coded data in the  
17  
18 database can be used and hence we rely upon accurate coding. Some individuals  
19  
20 may need to be excluded due to incomplete data, although in similar studies the  
21  
22 exclusion rate due to incomplete data has been low.(70, 71)  
23  
24  
25  
26  
27  
28

29 Prevalence of Med 3 certification is well captured in primary care but the reason  
30  
31 for issue is not available meaning that we cannot identify the condition relating to  
32  
33 the Med 3 certification. We cannot therefore determine whether the sick leave was  
34  
35 as a result of AA. However, our case-control approach will provide a method for  
36  
37 comparing Med 3 certificate issue rates in those affected and unaffected by AA. The  
38  
39 use of Read codes to identify unemployment is likely to systemically under-  
40  
41 estimate unemployment prevalence but is likely to be suitable for providing a  
42  
43 comparison with controls.  
44  
45  
46  
47  
48  
49

50 Another limitation is the possibility of missing treatment information from  
51  
52 secondary care. Secondary care records in the UK are frequently not computerised  
53  
54 and prescriptions are still commonly hand-written. At present there is no  
55  
56 mechanism for universally capturing secondary care prescriptions and linking  
57  
58 them to primary care records. We are therefore likely to underestimate  
59  
60

1  
2  
3 prescription rates for those with the most severe disease who are seen frequently  
4  
5 in secondary care. Where prescriptions are issued from primary care the indication  
6  
7 for the prescription is not available and we can therefore not confirm that the  
8  
9 prescription is for the treatment of AA.  
10  
11  
12  
13  
14

## 15 **Plans for dissemination**

16  
17  
18 We plan to publish the final study results in peer-reviewed journals and present  
19  
20 early findings at scientific meetings.  
21  
22  
23  
24  
25

## 26 **Conclusions**

27  
28  
29 This study series aims to provide the first large scale population-based analysis of  
30  
31 the epidemiology of AA in the UK and the current patterns of healthcare utilisation  
32  
33 and treatments in this group. We also aim to provide an extensive assessment of  
34  
35 the association between common mental health conditions and work-related  
36  
37 difficulties in people with AA; reporting the prevalence and incidence of these  
38  
39 conditions in people with new onset AA and matched controls. We aim to provide  
40  
41 an extensive evaluation of the prevalence and incidence of autoimmune and atopic  
42  
43 conditions in people with new onset AA and matched controls. Finally, we aim to  
44  
45 provide evidence for baseline common infection risk in people with AA which can  
46  
47 be used to support treatment decisions regarding the use of immune-modulating  
48  
49 medications for AA. This study series will extend our knowledge of the current  
50  
51 disease burden from AA and associated conditions.  
52  
53  
54  
55  
56  
57  
58  
59  
60

## List of abbreviations

| Abbreviation | Description                                 |
|--------------|---------------------------------------------|
| AA           | Alopecia Areata                             |
| CI           | Confidence Interval                         |
| HR           | Hazard Ratio                                |
| IAPT         | Improving Access to Psychological Therapies |
| IMD          | Index of Multiple Deprivation               |
| LRTI         | Lower respiratory tract infection           |
| OR           | Odds Ratio                                  |
| RA           | Rheumatoid Arthritis                        |
| RCGP         | Royal College of General Practitioners      |
| RSC          | Research and Surveillance Centre            |
| SLE          | Systemic Lupus Erythematosus                |
| T1DM         | Type 1 Diabetes                             |



## Declarations

### Patient and Public Involvement statement

The design of this protocol did not involve patients or this public.

### Ethics approval and dissemination

The study does not require formal research ethics committee (REC) approval as it will use anonymised routinely collected healthcare data; as defined by the NHS Health Research Authority research decision tool (<http://www.hra-decisiontools.org.uk/research/>) and the University of Surrey own Self-Assessment for Governance and Ethics (SAGE) tool. No patient identifiable information will be available to researchers. All participating practices display information to patients regarding data use through the RCGP RSC network. All patients who choose to opt out of data sharing do not have their data processed as part of RCGP RSC research studies. Approval for data access and use was granted by the RCGP and RSC Research Committee.

### Consent for publication

Not applicable

## Availability of data and materials

The RCGP RSC dataset can be accessed by *bone fide* researchers, approval is on a project-by-project basis ([www.rcgp.org.uk/rsc](http://www.rcgp.org.uk/rsc)). Researchers wishing to directly analyse the patient-level pseudonymised data will be required to complete information governance training and work on the data from the secure servers at the University of Surrey or University of Oxford. Patient-level data cannot be taken out of the secure networks.

## Competing interests

SdeL is Director of RCGP RSC, he has received funding for projects from Eli Lilly, Astra Zeneca, GSK, Seqirus and Takeda – all through his Universities and none related to this study. WSC and WRG are employees of Pfizer Ltd. SH and CT are investigators on the Pfizer funded Allegro clinical trial. AEM, ART, CT, MH and AGM declare that they have no competing interests.

## Funding statement

This research was sponsored and funded by Pfizer (grant number N/A).

## Authors' contributions

The study was designed and developed by CT, MH, SH, ART, AEM, WSC, WRG, and AGM with input from SdeL. The protocol writing was directed and critically reviewed by CT, MH, SH, ART, AEM, WSC, WRG, SdeL, and AGM.

## Acknowledgements

Medical writing and editorial support was provided by Louise Jordan, Anita Lynam, Andrew McGovern, and John Dennis at Momentum Data and was funded by Pfizer.

The authors would like to acknowledge project management support from Filipa Ferreira of the University of Oxford and University of Surrey. MH was supported by the NIHR Manchester Biomedical Research Centre.

For peer review only

## References

1. Hordinsky MK. Overview of alopecia areata. *J Invest Dermatol Symp Proc*. 2013;16(1):S13-5.
2. Alkhalifah A, Alsantali A, Wang E, McElwee KJ, Shapiro J. Alopecia areata update: part I. Clinical picture, histopathology, and pathogenesis. *Journal of the American Academy of Dermatology*. 2010;62(2):177-88, quiz 89-90.
3. Madani S, Shapiro J. Alopecia areata update. *Journal of the American Academy of Dermatology*. 2000;42(4):549-66; quiz 67-70.
4. Mirzoyev SA, Schrum AG, Davis MDP, Torgerson RR. Lifetime incidence risk of alopecia areata estimated at 2.1% by Rochester Epidemiology Project, 1990-2009. *J Invest Dermatol*. 2014;134(4):1141-2.
5. Villasante Fricke AC, Miteva M. Epidemiology and burden of alopecia areata: a systematic review. *Clin Cosmet Investig Dermatol*. 2015;8:397-403.
6. Richard MA, Corgibet F, Beylot-Barry M, Barbaud A, Bodemer C, Chaussade V, et al. Sex- and age-adjusted prevalence estimates of five chronic inflammatory skin diseases in France: results of the << OBJECTIFS PEAU >> study. *J Eur Acad Dermatol Venereol*. 2018;32(11):1967-71.
7. Harries MJ, Sun J, Paus R, King LE. Management of alopecia areata. *BMJ*. 2010;341:c3671.
8. Cochrane. Treatments for alopecia aerate, alopecia totalis and alopecia universalis. 2008.
9. Lee S, Lee H, Lee CH, Lee WS. Comorbidities in alopecia areata: A systematic review and meta-analysis. *Journal of the American Academy of Dermatology*. 2019;80(2):466-77.e16.
10. Montgomery K, White C, Thompson A. A mixed methods survey of social anxiety, anxiety, depression and wig use in alopecia. *BMJ open*. 2017;7(4):e015468.
11. Huang KP, Mullangi S, Guo Y, Qureshi AA. Autoimmune, atopic, and mental health comorbid conditions associated with alopecia areata in the United States. *JAMA Dermatol*. 2013;149(7):789-94.
12. Hunt N, McHale S. The psychological impact of alopecia. *BMJ*. 2005;331(7522):951-3.
13. Safavi K. Prevalence of alopecia areata in the First National Health and Nutrition Examination Survey. *Arch Dermatol*. 1992;128(5):702.
14. Sharma VK, Dawn G, Kumar B. Profile of alopecia areata in Northern India. *Int J Dermatol*. 1996;35(1):22-7.
15. Tan E, Tay YK, Goh CL, Chin Giam Y. The pattern and profile of alopecia areata in Singapore--a study of 219 Asians. *Int J Dermatol*. 2002;41(11):748-53.
16. Yang S, Yang J, Liu JB, Wang HY, Yang Q, Gao M, et al. The genetic epidemiology of alopecia areata in China. *Br J Dermatol*. 2004;151(1):16-23.
17. Guzmán-Sánchez DA, Villanueva-Quintero GD, Alfaro Alfaro N, McMichael A. A clinical study of alopecia areata in Mexico. *Int J Dermatol*. 2007;46(12):1308-10.
18. Furue M, Yamazaki S, Jimbow K, Tsuchida T, Amagai M, Tanaka T, et al. Prevalence of dermatological disorders in Japan: a nationwide, cross-sectional, seasonal, multicenter, hospital-based study. *J Dermatol*. 2011;38(4):310-20.
19. Singam V, Patel KR, Lee HH, Rastogi S, Silverberg JI. Association of alopecia areata with hospitalization for mental health disorders in US adults. *Journal of the American Academy of Dermatology*. 2019;80(3):792-4.

20. Sellami R, Masmoudi J, Ouali U, Mnif L, Amouri M, Turki H, et al. The relationship between alopecia areata and alexithymia, anxiety and depression: a case-control study. *Indian J Dermatol*. 2014;59(4):421.
21. Ruiz-Doblado S, Carrizosa A, García-Hernández MJ. Alopecia areata: psychiatric comorbidity and adjustment to illness. *Int J Dermatol*. 2003;42(6):434-7.
22. Baghestani S, Zare S, Seddigh SH. Severity of Depression and Anxiety in Patients with Alopecia Areata in Bandar Abbas, Iran. *Dermatol Reports*. 2015;7(3):6063.
23. Chu SY, Chen YJ, Tseng WC, Lin MW, Chen TJ, Hwang CY, et al. Psychiatric comorbidities in patients with alopecia areata in Taiwan: a case-control study. *Br J Dermatol*. 2012;166(3):525-31.
24. Vallerand IA, Lewinson RT, Parsons LM, Hardin J, Haber RM, Lowerison MW, et al. Assessment of a Bidirectional Association Between Major Depressive Disorder and Alopecia Areata. *JAMA Dermatol*. 2019.
25. Paus R, Ito N, Takigawa M, Ito T. The hair follicle and immune privilege. *J Invest Dermatol Symp Proc*. 2003;8(2):188-94.
26. Barahmani N, Schabath MB, Duvic M. History of atopy or autoimmunity increases risk of alopecia areata. *Journal of the American Academy of Dermatology*. 2009;61(4):581-91.
27. Chen C-H, Wang K-H, Lin H-C, Chung S-D. Follow-up study on the relationship between alopecia areata and risk of autoimmune diseases. *The Journal of Dermatology*. 2016;43(2):228-9.
28. Tosti A. Practice gaps. Alopecia areata and comorbid conditions. *JAMA Dermatol*. 2013;149(7):794.
29. Tan E, Tay YK, Giam YC. A clinical study of childhood alopecia areata in Singapore. *Pediatr Dermatol*. 2002;19(4):298-301.
30. Jagielska D, Redler S, Brockschmidt FF, Herold C, Pasternack SM, Garcia Bartels N, et al. Follow-up study of the first genome-wide association scan in alopecia areata: IL13 and KIAA0350 as susceptibility loci supported with genome-wide significance. *J Invest Dermatol*. 2012;132(9):2192-7.
31. Bhardwaj EK, Trüeb RM. Acute diffuse and total alopecia of the female scalp associated with borrelia-infection. *International journal of trichology*. 2015;7(1):26-8.
32. Cho M, Cohen PR, Duvic M. Vitiligo and alopecia areata in patients with human immunodeficiency virus infection. *Southern medical journal*. 1995;88(4):489-91.
33. Gil Montoya JA, Cutando Soriano A, Jimenez Prat J. Alopecia areata of dental origin. *Medicina oral : organo oficial de la Sociedad Espanola de Medicina Oral y de la Academia Iberoamericana de Patologia y Medicina Bucal*. 2002;7(4):303-8.
34. Ito T, Tokura Y. Alopecia areata triggered or exacerbated by swine flu virus infection. *The Journal of dermatology*. 2012;39(10):863-4.
35. Jackow C, Puffer N, Hordinsky M, Nelson J, Tarrand J, Duvic M. Alopecia areata and cytomegalovirus infection in twins: genes versus environment? *Journal of the American Academy of Dermatology*. 1998;38(3):418-25.
36. Offidani A, Amerio P, Bernardini ML, Feliciani C, Bossi G. Role of cytomegalovirus replication in alopecia areata pathogenesis. *Journal of cutaneous medicine and surgery*. 2000;4(2):63-5.

- 1  
2  
3 37. Paoletti V, Mammarella A, Basili S, Paradiso M, Di Franco M, De Matteis A, et  
4 al. Prevalence and clinical features of skin diseases in chronic HCV infection. A  
5 prospective study in 96 patients. *Panminerva medica*. 2002;44(4):349-52.
- 6 38. Richardson CT, Hayden MS, Gilmore ES, Poligone B. Evaluation of the  
7 Relationship between Alopecia Areata and Viral Antigen Exposure. *American*  
8 *journal of clinical dermatology*. 2018;19(1):119-26.
- 9 39. Kartal ED, Alpat SN, Ozgunes I, Usluer G. Reversible alopecia universalis  
10 secondary to PEG-interferon alpha-2b and ribavirin combination therapy in a  
11 patient with chronic hepatitis C virus infection. *European journal of*  
12 *gastroenterology & hepatology*. 2007;19(9):817-20.
- 13 40. Abdel Hafez HZ, Mahran AM, Hofny EM, Attallah DAA, Sayed DS, Rashed H.  
14 Alopecia areata is not associated with *Helicobacter pylori*. *Indian journal of*  
15 *dermatology*. 2009;54(1):17-9.
- 16 41. Domínguez-Andrés J, Netea MG. Impact of Historic Migrations and  
17 Evolutionary Processes on Human Immunity. *Trends in Immunology*.  
18 2019;40(12):1105-19.
- 19 42. Dubois PC, Trynka G, Franke L, Hunt KA, Romanos J, Curtotti A, et al. Multiple  
20 common variants for celiac disease influencing immune gene expression. *Nat*  
21 *Genet*. 2010;42(4):295-302.
- 22 43. Hung SC, Hou T, Jiang W, Wang N, Qiao SW, Chow IT, et al. Epitope Selection  
23 for HLA-DQ2 Presentation: Implications for Celiac Disease and Viral Defense. *J*  
24 *Immunol*. 2019;202(9):2558-69.
- 25 44. Zhernakova A, Elbers CC, Ferwerda B, Romanos J, Trynka G, Dubois PC, et al.  
26 Evolutionary and functional analysis of celiac risk loci reveals SH2B3 as a  
27 protective factor against bacterial infection. *Am J Hum Genet*. 2010;86(6):970-7.
- 28 45. Kucharzik T, Maaser C. Infections and Chronic Inflammatory Bowel Disease.  
29 *Viszeralmedizin*. 2014;30(5):326-32.
- 30 46. Toruner M, Loftus EV, Jr., Harmsen WS, Zinsmeister AR, Orenstein R,  
31 Sandborn WJ, et al. Risk factors for opportunistic infections in patients with  
32 inflammatory bowel disease. *Gastroenterology*. 2008;134(4):929-36.
- 33 47. Brassard P, Bitton A, Suissa A, Sinyavskaya L, Patenaude V, Suissa S. Oral  
34 Corticosteroids and the Risk of Serious Infections in Patients With Elderly-Onset  
35 Inflammatory Bowel Diseases. *The American journal of gastroenterology*.  
36 2014;109:1795.
- 37 48. Lichtenstein GR, Feagan BG, Cohen RD, Salzberg BA, Diamond RH, Chen DM,  
38 et al. Serious infections and mortality in association with therapies for Crohn's  
39 disease: TREAT registry. *Clinical gastroenterology and hepatology : the official*  
40 *clinical practice journal of the American Gastroenterological Association*.  
41 2006;4(5):621-30.
- 42 49. Lichtenstein GR, Feagan BG, Cohen RD, Salzberg BA, Diamond RH, Price S, et  
43 al. Serious infection and mortality in patients with Crohn's disease: more than 5  
44 years of follow-up in the TREAT registry. *The American journal of*  
45 *gastroenterology*. 2012;107(9):1409-22.
- 46 50. Fardet L, Petersen I, Nazareth I. Common Infections in Patients Prescribed  
47 Systemic Glucocorticoids in Primary Care: A Population-Based Cohort Study. *PLOS*  
48 *Medicine*. 2016;13(5):e1002024.
- 49 51. Nikiphorou E, de Lusignan S, Mallen C, Khavandi K, Roberts J, Buckley CD, et  
50 al. Haematological abnormalities in new-onset rheumatoid arthritis and risk of  
51 common infections: a population-based study. *Rheumatology*. 2019.
- 52  
53  
54  
55  
56  
57  
58  
59  
60



- 1  
2  
3 52. Gilhar A, Keren A, Paus R. JAK inhibitors and alopecia areata. *The Lancet*. 2019;393(10169):318-9.
- 4  
5  
6 53. Correa A, Hinton W, McGovern A, van Vlymen J, Yonova I, Jones S, et al. Royal  
7 College of General Practitioners Research and Surveillance Centre (RCGP RSC)  
8 sentinel network: a cohort profile. *BMJ open*. 2016;6(4):e011092.
- 9  
10 54. de Lusignan S, van Weel C. The use of routinely collected computer data for  
11 research in primary care: opportunities and challenges. *Family practice*.  
12 2006;23(2):253-63.
- 13  
14 55. de Lusignan S, Metsemakers JF, Houwink P, Gunnarsdottir V, van der Lei J.  
15 Routinely collected general practice data: goldmines for research? A report of the  
16 European Federation for Medical Informatics Primary Care Informatics Working  
17 Group (EFMI PCIWG) from MIE2006, Maastricht, The Netherlands. *Informatics in  
18 primary care*. 2006;14(3):203-9.
- 19  
20 56. Woodmansey C, McGovern AP, McCullough KA, Whyte MB, Munro NM,  
21 Correa AC, et al. Incidence, Demographics, and Clinical Characteristics of Diabetes  
22 of the Exocrine Pancreas (Type 3c): A Retrospective Cohort Study. *Diabetes care*.  
23 2017;40(11):1486-93.
- 24  
25 57. Nikiphorou E, de Lusignan S, Mallen C, Roberts J, Khavandi K, Bedarida G, et  
26 al. Prognostic value of comorbidity indices and lung diseases in early rheumatoid  
27 arthritis: a UK population-based study. *Rheumatology*. 2019.
- 28  
29 58. de Lusignan S, Alexander H, Broderick C, Dennis J, McGovern A, Feeney C, et  
30 al. Epidemiology and management of atopic dermatitis in England: an  
31 observational cohort study protocol. *BMJ Open*. 2020;10(9):e037518.
- 32  
33 59. Galloway J, Barrett K, Irving P, Khavandi K, Nijher M, Nicholson R, et al. Risk  
34 of venous thromboembolism in immune-mediated inflammatory diseases: a UK  
35 matched cohort study. *RMD Open*. 2020;6(3):e001392.
- 36  
37 60. Pathirannehelage S, Kumarapeli P, Byford R, Yonova I, Ferreira F, de  
38 Lusignan S. Uptake of a Dashboard Designed to Give Realtime Feedback to a  
39 Sentinel Network About Key Data Required for Influenza Vaccine Effectiveness  
40 Studies. *Stud Health Technol Inform*. 2018;247:161-5.
- 41  
42 61. Office for National Statistics. Ethnicity2018 2nd January 2020. Available  
43 from:  
44 [https://www.ons.gov.uk/peoplepopulationandcommunity/culturalidentity/ethni](https://www.ons.gov.uk/peoplepopulationandcommunity/culturalidentity/ethnicity)  
45 [city](https://www.ons.gov.uk/peoplepopulationandcommunity/culturalidentity/ethnicity).
- 46  
47 62. Ministry of Housing CLG. English indices of deprivation 2015: technical  
48 report2015 2nd Jan 2020. Available from:  
49 [https://www.gov.uk/government/publications/english-indices-of-deprivation-](https://www.gov.uk/government/publications/english-indices-of-deprivation-2015-technical-report)  
50 [2015-technical-report](https://www.gov.uk/government/publications/english-indices-of-deprivation-2015-technical-report).
- 51  
52 63. Kessler RC, Chiu WT, Demler O, Merikangas KR, Walters EE. Prevalence,  
53 severity, and comorbidity of 12-month DSM-IV disorders in the National  
54 Comorbidity Survey Replication. *Archives of general psychiatry*. 2005;62(6):617-  
55 27.
- 56  
57 64. Hayter SM, Cook MC. Updated assessment of the prevalence, spectrum and  
58 case definition of autoimmune disease. *Autoimmun Rev*. 2012;11(10):754-65.
- 59  
60 65. Cooper GS, Bynum MLK, Somers EC. Recent insights in the epidemiology of  
61 autoimmune diseases: improved prevalence estimates and understanding of  
62 clustering of diseases. *J Autoimmun*. 2009;33(3-4):197-207.
- 63  
64 66. Dean LE, Jones GT, MacDonald AG, Downham C, Sturrock RD, Macfarlane GJ.  
65 Global prevalence of ankylosing spondylitis. *Rheumatology*. 2013;53(4):650-7.

- 1  
2  
3 67. Gladman DD, Antoni C, Mease P, Clegg DO, Nash P. Psoriatic arthritis:  
4 epidemiology, clinical features, course, and outcome. *Annals of the Rheumatic*  
5 *Diseases*. 2005;64(suppl 2):ii14-ii7.  
6  
7 68. Prickitt J, McMichael AJ, Gallagher L, Kalabokes V, Boeck C. Helping patients  
8 cope with chronic alopecia areata. *Dermatol Nurs*. 2004;16(3):237-41.  
9  
10 69. Rayner L, Sherlock J, Creagh-Brown B, Williams J, deLusignan S. The  
11 prevalence of COPD in England: An ontological approach to case detection in  
12 primary care. *Respir Med*. 2017;132:217-25.  
13  
14 70. Rayner LH, McGovern A, Sherlock J, Gatenby P, Correa A, Creagh-Brown B, et  
15 al. The impact of therapy on the risk of asthma in type 2 diabetes. *Clin Respir J*.  
16 2019;13(5):299-305.  
17  
18 71. Kumar S, de Lusignan S, McGovern A, Correa A, Hriskova M, Gatenby P, et al.  
19 Ischaemic stroke, haemorrhage, and mortality in older patients with chronic  
20 kidney disease newly started on anticoagulation for atrial fibrillation: a population  
21 based study from UK primary care. *Bmj*. 2018;360:k342.  
22  
23 72. Behr MA, Divangahi M, Lalande J-D. What's in a name? The (mis)labelling of  
24 Crohn's as an autoimmune disease. *The Lancet*. 2010;376(9736):202-3.  
25  
26  
27  
28  
29  
30  
31  
32  
33  
34  
35  
36  
37  
38  
39  
40  
41  
42  
43  
44  
45  
46  
47  
48  
49  
50  
51  
52  
53  
54  
55  
56  
57  
58  
59  
60



## Tables

**Table 1.** The autoimmune and atopic conditions to be explored. For full definitions see Supplementary Tables S4.1 – S4.16, Additional file 2

| <b>Disease category</b>  | <b>Conditions</b>                                                                                                                           |
|--------------------------|---------------------------------------------------------------------------------------------------------------------------------------------|
| <b>Atopic conditions</b> | Atopic dermatitis, allergic rhinitis, asthma                                                                                                |
| <b>Gastrointestinal</b>  | Crohn's disease*, ulcerative colitis, coeliac disease, pernicious anaemia                                                                   |
| <b>Endocrine</b>         | Type 1 diabetes, Hashimoto's thyroiditis, Grave's disease                                                                                   |
| <b>Rheumatological</b>   | Rheumatoid arthritis, psoriatic arthritis, ankylosing spondylitis, systemic lupus erythematosus, polymyalgia rheumatica, Sjögren's syndrome |
| <b>Dermatological</b>    | Psoriasis, vitiligo                                                                                                                         |
| <b>Neurological</b>      | Multiple sclerosis                                                                                                                          |

\*Whilst there has been some debate about whether or not Crohn's disease is an autoimmune condition it involves a degree of immune dysregulation and is therefore included for completeness.(72)

**Table 2.** The common infections to be explored. \*Inclusion of COVID-19 will depend on data availability.

| <b>Infection</b>                         | <b>Description</b>                                                                                                    |
|------------------------------------------|-----------------------------------------------------------------------------------------------------------------------|
| <b>Upper respiratory tract infection</b> | All infections of the upper respiratory tract including rhinitis, pharyngitis, sinusitis, and the common cold         |
| <b>Lower respiratory tract infection</b> | All infection of the lower respiratory tract including pneumonia and acute bronchitis.                                |
| <b>Pneumonia</b>                         | A subgroup of LRTI consisting of bacterial and viral pneumonias                                                       |
| <b>Acute bronchitis</b>                  | A subgroup of LRTI consisting of inflammation of the large and medium airways usually of viral origin                 |
| <b>Influenza</b>                         | Confirmed cases of influenza and cases of influenza-like illness                                                      |
| <b>Skin infection</b>                    | Cellulitis and other infective skin conditions                                                                        |
| <b>Urinary tract infection</b>           | Infections of the urinary tract including cystitis and pyelonephritis                                                 |
| <b>Genital infections</b>                | All infections of the genital tract including sexually transmitted infections and non-sexually transmitted infections |
| <b>Gastrointestinal infection</b>        | All infections of the gastrointestinal tract including gastroenteritis                                                |
| <b>Herpes simplex</b>                    | Mucocutaneous infections caused but herpes simplex viruses                                                            |
| <b>Herpes zoster</b>                     | Infections caused by the varicella-zoster virus                                                                       |
| <b>Meningitis</b>                        | All infections, bacterial or viral, causing meningitis                                                                |
| <b>COVID-19</b>                          | Confirmed or clinically diagnosed COVID-19*                                                                           |

1  
2  
3  
4  
5  
6  
7  
8  
9  
10  
11  
12  
13  
14  
15  
16  
17  
18  
19  
20  
21  
22  
23  
24  
25  
26  
27  
28  
29  
30  
31  
32  
33  
34  
35  
36  
37  
38  
39  
40  
41  
42  
43  
44  
45  
46  
47  
48  
49  
50  
51  
52  
53  
54  
55  
56  
57  
58  
59  
60

# **The epidemiology, management, and the associated burden of mental health illness, atopic and autoimmune conditions, and common infections in alopecia areata: Statistical Analysis Plan**

Dr Matthew Harries, Dr Abby E. Macbeth, Dr Susan Holmes, Professor Andrew R Thompson, Dr Wing Sin Chiu, Dr William Romero Gallardo, Professor Andrew G Messenger, Dr Christos Tziotzios, Professor Simon de Lusignan

For peer review only

## Contents

|    |                                                                     |    |
|----|---------------------------------------------------------------------|----|
| 1  |                                                                     |    |
| 2  | List of abbreviations .....                                         | 4  |
| 3  |                                                                     |    |
| 4  | 1. Introduction .....                                               | 5  |
| 5  | 1.1 Background .....                                                | 5  |
| 6  | 1.2. Purposes of analyses .....                                     | 5  |
| 7  | Study 1: Epidemiology of AA .....                                   | 5  |
| 8  | Study 2: Mental health comorbidities in patients with AA .....      | 5  |
| 9  | Study 3: Autoimmune and atopic conditions in people with AA .....   | 6  |
| 10 | Study 4: Common infections in people with AA .....                  | 6  |
| 11 | 2. Study objectives and endpoints .....                             | 7  |
| 12 | 2.1 Study objectives .....                                          | 7  |
| 13 | 2.1.1 Study 1 .....                                                 | 7  |
| 14 | 2.1.2 Study 2 .....                                                 | 7  |
| 15 | 2.1.3 Study 3 .....                                                 | 7  |
| 16 | 2.1.4 Study 4 .....                                                 | 7  |
| 17 | 2.2 Primary objectives .....                                        | 8  |
| 18 | 2.2.1 Study 1 .....                                                 | 8  |
| 19 | 2.2.2 Study 2 .....                                                 | 8  |
| 20 | 2.2.3 Study 3 .....                                                 | 8  |
| 21 | 2.2.4 Study 4 .....                                                 | 8  |
| 22 | 2.3 Secondary objectives: .....                                     | 9  |
| 23 | 2.3.1 Study 1 .....                                                 | 9  |
| 24 | 2.3.2 Study 2 .....                                                 | 9  |
| 25 | 2.3.3 Study 3 .....                                                 | 9  |
| 26 | 2.3.4 Study 4 .....                                                 | 9  |
| 27 | 2.4 Primary endpoint .....                                          | 10 |
| 28 | 2.5 Secondary endpoints .....                                       | 11 |
| 29 | 2.6 Other exploratory analyses .....                                | 11 |
| 30 | 3 General Study Design and Plan .....                               | 11 |
| 31 | 3.1 Study Design .....                                              | 11 |
| 32 | 3.1.1 Study 1: .....                                                | 11 |
| 33 | 3.1.2 Study 2: .....                                                | 11 |
| 34 | 3.1.3 Study 3: .....                                                | 11 |
| 35 | 3.1.4 Study 4: .....                                                | 12 |
| 36 | 3.2 Data source and Read codes .....                                | 12 |
| 37 | 3.3 Data extraction .....                                           | 12 |
| 38 | 3.4 Inclusion-Exclusion Criteria and General Study Population ..... | 12 |
| 39 | 3.4.1 AA definition .....                                           | 12 |
| 40 | 3.5 Baseline socio-economic characteristics .....                   | 13 |
| 41 |                                                                     |    |
| 42 |                                                                     |    |
| 43 |                                                                     |    |
| 44 |                                                                     |    |
| 45 |                                                                     |    |
| 46 |                                                                     |    |
| 47 |                                                                     |    |
| 48 |                                                                     |    |
| 49 |                                                                     |    |
| 50 |                                                                     |    |
| 51 |                                                                     |    |
| 52 |                                                                     |    |
| 53 |                                                                     |    |
| 54 |                                                                     |    |
| 55 |                                                                     |    |
| 56 |                                                                     |    |
| 57 |                                                                     |    |
| 58 |                                                                     |    |
| 59 |                                                                     |    |
| 60 |                                                                     |    |

|    |                                                                     |    |
|----|---------------------------------------------------------------------|----|
| 1  | 3.6 Epidemiology of AA .....                                        | 13 |
| 2  | 3.7 Current service utilisation and management patterns .....       | 13 |
| 3  | 3.8 Mental health treatment, sick day, and unemployment burden..... | 13 |
| 4  | 4 Sample size calculations.....                                     | 14 |
| 5  | 4.1.1 Study 1.....                                                  | 14 |
| 6  | 4.1.2 Study 2.....                                                  | 14 |
| 7  | 4.1.3 Study 3.....                                                  | 14 |
| 8  | 4.1.4 Study 4.....                                                  | 15 |
| 9  | 5 Populations to be analysed.....                                   | 15 |
| 10 | 5.1 Inclusion Criteria .....                                        | 15 |
| 11 | 5.2 Exclusion Criteria .....                                        | 15 |
| 12 | 5.3 Matching process.....                                           | 16 |
| 13 | 5.4 AA definition exploratory analyses.....                         | 16 |
| 14 | 6 Statistical Analysis .....                                        | 17 |
| 15 | 6.1 Statistical principles .....                                    | 17 |
| 16 | 6.2 Primary Endpoint Analysis.....                                  | 17 |
| 17 | 6.2.1 Study 1 .....                                                 | 17 |
| 18 | 6.2.2 Study 2 .....                                                 | 18 |
| 19 | 6.2.3 Study 3 .....                                                 | 19 |
| 20 | 6.2.4 Study 4.....                                                  | 19 |
| 21 | 6.3 Secondary Objective Analysis .....                              | 19 |
| 22 | 6.3.1 Study 1 .....                                                 | 19 |
| 23 | 6.3.2 Study 2 .....                                                 | 19 |
| 24 | 6.3.3 Study 3 .....                                                 | 20 |
| 25 | 6.3.4 Study 4.....                                                  | 20 |
| 26 | 6.4 Sensitivity analysis.....                                       | 20 |
| 27 | 6.5 Missing data.....                                               | 20 |
| 28 | 7 Study Limitations .....                                           | 21 |
| 29 | 8 Statistical software .....                                        | 21 |
| 30 | 9 Ethics .....                                                      | 21 |
| 31 | 10 Acknowledgements .....                                           | 21 |
| 32 | References .....                                                    | 22 |
| 33 |                                                                     |    |
| 34 |                                                                     |    |
| 35 |                                                                     |    |
| 36 |                                                                     |    |
| 37 |                                                                     |    |
| 38 |                                                                     |    |
| 39 |                                                                     |    |
| 40 |                                                                     |    |
| 41 |                                                                     |    |
| 42 |                                                                     |    |
| 43 |                                                                     |    |
| 44 |                                                                     |    |
| 45 |                                                                     |    |
| 46 |                                                                     |    |
| 47 |                                                                     |    |
| 48 |                                                                     |    |
| 49 |                                                                     |    |
| 50 |                                                                     |    |
| 51 |                                                                     |    |
| 52 |                                                                     |    |
| 53 |                                                                     |    |
| 54 |                                                                     |    |
| 55 |                                                                     |    |
| 56 |                                                                     |    |
| 57 |                                                                     |    |
| 58 |                                                                     |    |
| 59 |                                                                     |    |
| 60 |                                                                     |    |

## List of abbreviations

| Abbreviation | Full Form                                                               |
|--------------|-------------------------------------------------------------------------|
| AA           | Alopecia Areata                                                         |
| BMI          | Body Mass Index                                                         |
| CKD          | Chronic Kidney Disease stage 3-5                                        |
| COPD         | Chronic Obstructive Pulmonary Disorder                                  |
| HR           | Hazard Ratio                                                            |
| IMD          | Index of Multiple Deprivation                                           |
| NIHR         | National Institute for Health Research                                  |
| OR           | Odds Ratio                                                              |
| RA           | Rheumatoid Arthritis                                                    |
| RCGP RSC     | Royal College of General Practitioners Research and Surveillance Centre |
| SD           | Standard Deviation                                                      |
| SES          | Socio-Economic Status                                                   |
| SLE          | Systemic Lupus Erythematosus                                            |
| SSRI         | Selective Serotonin Reuptake Inhibitor                                  |
| T1DM         | Type 1 Diabetes                                                         |
| T2DM         | Type 2 Diabetes                                                         |

# 1. Introduction

## 1.1 Background

Alopecia areata (AA) is a common cause of immune-mediated, non-scarring hair loss. (1) Clinical presentations of AA are heterogeneous, ranging from well-demarcated patches of hair loss on the scalp to total loss of hair on the scalp (*alopecia areata totalis*) or entire scalp and body (*alopecia areata universalis*). (2) Active AA is estimated to affect approximately 0.1-0.2% (2, 3) of the population worldwide, with a lifetime risk of 1.0 -2.1%. (4-6)

Following the initial episode, the majority of those with limited patchy AA will experience spontaneous remission, but over 80% will have subsequent relapses. (7) Spontaneous remission has been reported to occur in less than 10% of those with extensive AA. (7) A number of treatment options can induce hair growth in people with AA, but none have been shown to have a durable impact on remission. (8)

AA has been associated with several autoimmune conditions supporting the theory of an underlying autoimmune aetiology. (9, 10) Atopic conditions and mental health disorders have also been demonstrated to be more common in people with AA, (9-11) although the temporal relationship between psychiatric conditions and AA remains poorly researched. (12) The association between AA and common infections is not well studied.

## 1.2. Purposes of analyses

This statistical analysis plan covers four related AA studies.

### Study 1: Epidemiology of AA

Population studies in the USA using the Rochester Epidemiology Project database estimate the lifetime risk of AA to be 2.1%. (4) The database contained information from all patients registered with a healthcare provider in Olmstead County, Minnesota from 1990-2009. Previous studies using this database from 1971-1974 estimated the overall prevalence of AA to be 0.1-0.2%, (13) with no published studies reporting prevalence estimates since this. Other epidemiological studies have assessed the incidence of AA in patients referred to dermatology services. Clinic-based studies from around the world have estimated the incidence of AA to be in the region of 0.57-3.8%. (14-18)

Worldwide, the majority of studies on AA have not found a significant difference in incidence between males and females. (5) AA onset occurs before the age of 40 in 82-86% of cases. (5) To date, there have been no large population-based studies of AA epidemiology in UK populations.

### Study 2: Mental health comorbidities in patients with AA

It is well recognised by clinical experts in AA that the condition can have a profound psychological impact and a possible comorbid burden of mental health conditions. A recent USA cross-sectional database study comparing 5,605 patients with AA with matched controls found a higher prevalence of mental health diagnoses in the AA group (32.8% vs 20.0%). (19) In particular, higher rates of depression (OR 2.18, 95%CI 1.80-2.63), anxiety disorders (OR 2.46, 95%CI 1.91-3.16), attention-deficit disorders (OR 8.11, 95%CI 5.22-12.59), adjustment disorders (OR 4.80, 95%CI 2.58-8.91) and obsessive compulsive

1 disorders (OR 4.95, 95%CI 1.59-15.35) were observed when compared with controls. (19)  
2 These findings concur with previous work and a similar pattern is seen in other countries.  
3 (20-23)

4  
5 Recently a British study identified a bi-directional positive association between major  
6 depressive disorder and AA. (24) In a sample of over 400,000 participants, major depressive  
7 disorder was seen to increase the risk of incident AA by 90% [HR 1.90, 95%CI 1.67-2.15]  
8 and AA was found to increase the risk of incident major depressive disorder by 34% [HR  
9 1.34, 95%CI 1.23-1.46]. (24) The association of other common mental health conditions  
10 with AA however was not assessed.  
11

### 12 **Study 3: Autoimmune and atopic conditions in people with AA**

13 A central theory in AA pathogenesis is that it is an autoimmune phenomenon resulting from  
14 a disruption of hair follicle 'immune privilege', where numerous immunological  
15 mechanisms fail to prevent cytotoxic immune attack on cells and antigens present at that  
16 site. (25)  
17

18  
19 A number of studies have reported autoimmune conditions to occur more frequently in  
20 those with AA than in the general population, however results are conflicting, and studies  
21 have been limited by potential recruiting, recall and reporting biases. (26) A Taiwanese  
22 retrospective cohort study found individuals with AA to have an overall increased risk of  
23 developing an autoimmune condition when compared with matched controls (HR 1.86,  
24 95%CI 1.32-2.63). In particular, greater risks of incident systemic lupus erythematosus  
25 (SLE) (HR 5.02; 95%CI 2.08-12.51), psoriasis (HR 2.01; 95%CI 1.06-3.83) and rheumatoid  
26 arthritis (RA) (HR 1.79; 95%CI 1.07-3.00) were observed. (27) There was no relationship  
27 between AA and Hashimoto's thyroiditis or type 1 diabetes (T1DM). A large USA cross-  
28 sectional study of 3,658 individuals with AA, found that 14.6% had a diagnosis of thyroid  
29 disease, 11.1% had T1DM, 4.3% had inflammatory bowel disease, 2.8% had vitiligo and 6.3%  
30 had psoriasis. (10) These figures were all higher than would be expected in the general  
31 population. A recent systematic review and meta-analysis found AA to be significantly  
32 associated with Graves' Disease (OR 2.07, 95%CI 1.80-2.38) and Hashimoto's Thyroiditis  
33 (OR 2.15; 95%CI 1.71-2.72) but not with SLE, RA, Psoriasis or T1DM. (9)  
34  
35

36  
37 There has also been interest in the prevalence of co-morbid atopy in patients with AA. The  
38 prevalence of atopy in patients with AA has been reported to be in the range of 11-38.2%  
39 (5) representing cohorts from the USA, India and Singapore. (10, 14, 28, 29) A large meta-  
40 analysis found patients with AA had higher odds of having atopic dermatitis (OR 2.36;  
41 95%CI 1.80-3.09) and allergic rhinitis (OR 1.33;95%CI 1.19-1.47) when compared with  
42 controls. (9) It is not however surprising from a pathogenesis perspective in terms of shared  
43 pathways of autoimmune susceptibility; IL-13 loci have been associated with autoimmune  
44 and atopic conditions, and a genome-wide association study established that IL-13 is also  
45 susceptible loci for AA. (30)  
46  
47

### 48 **Study 4: Common infections in people with AA**

49  
50 It has been hypothesized that infections may act as triggers for AA; with particular interest  
51 in *Helicobacter pylori*, cytomegalovirus, Epstein-Barr virus, hepatitis B virus, hepatitis C  
52 virus, and human immunodeficiency virus but others have also been suggested.(9, 31-38)  
53 Some case reports has suggested improvement or resolution of AA with treatment of the  
54 associated infection.(33, 39). However, early small-scale studies have failed to find  
55 convincing evidence to support associations.(35, 36, 40)  
56  
57  
58  
59  
60



1 Multiple genetic loci have been identified to be both protective from infection but increase  
2 the risk for autoimmune disease.(41) Examples include the HLA variants HLA-DQ2 and  
3 HLA-DQ8 which confer protection against viral infections including influenza but are  
4 associated with inflammatory bowel disease,(42, 43) and SH2B3 rs3184504\*A gene variant  
5 protective against Escherichia coli infection but also detrimental for inflammatory bowel  
6 disease.(44) These loci which, in the past have conferred a genetic advantage, may still  
7 confer a reduced infection risk.(41) It is currently unclear if the genetic predisposition for  
8 AA is caused by genetic factors which also confer protection against any common infections.  
9 In other autoimmune conditions, infection risk is often increased as a result of the  
10 pathological changes resulting from the condition itself, the effects of immune-modulatory  
11 treatment, or through increased exposure to pathogens through healthcare contact.(45-51)  
12 An understanding of the relative infection rates in people with AA compared to those  
13 without is of particular importance with the emergence of Janus kinase inhibitors as a  
14 potential treatment option.(52) Whilst this medication class can produce impressive hair  
15 regrowth results even in long-standing, AA their use is associated with some increased  
16 infection risk; in particular, urinary tract infections, viral gastroenteritis fungal infections,  
17 and varicella zoster infection.(52)

## 2. Study objectives and endpoints

### 2.1 Study objectives

#### 2.1.1 Study 1

The overall purpose of study 1 is to describe the epidemiology (incidence and prevalence) of AA and to assess the current level of primary care service utilisation and management patterns associated with people diagnosed with AA.

#### 2.1.2 Study 2

The overall purpose of study 2 is to assess the prevalence and incidence of mental health conditions (depressive episodes, recurrent depressive disorder and anxiety disorder) in adult people diagnosed with AA relative to a control population of people without a diagnosis of AA. In addition, the study will determine the treatment burden (medications and psychological interventions used to treat mental health conditions), 'sick day' burden, and unemployment burden of AA.

#### 2.1.3 Study 3

The overall purpose of study 3 is to assess the prevalence and incidence of atopic and autoimmune conditions in adult people diagnosed with AA relative to a control population of people without AA.

#### 2.1.4 Study 4

The overall purpose of study 4 is to assess the incidence of common infections in people diagnosed with AA relative to a control population of people without AA.

## 2.2 Primary objectives

### 2.2.1 Study 1

#### 2.2.1.1

Describe the epidemiology of AA: Incidence of AA over time and by age, sex, ethnicity, and sociodemographic factors, and point prevalence by age and sex.

#### 2.2.1.2

Describe current primary care service utilisation and management patterns in AA.

### 2.2.2 Study 2

#### 2.2.2.1

Describe the prevalence of common mental health conditions (depressive episodes, recurrent depressive disorder and anxiety disorder) in adult people diagnosed with AA in a contemporary real-world population compared with matched controls without AA.

#### 2.2.2.2

Describe the incidence of common mental health conditions (depressive episodes, recurrent depressive disorder and anxiety disorder) in adult people diagnosed with AA in a contemporary real-world population compared with matched controls in the first two years after AA diagnosis.

#### 2.2.2.3

Describe the mental health treatment burden of adult people diagnosed with AA.

### 2.2.3 Study 3

#### 2.2.3.1

Describe the prevalence of atopic and autoimmune conditions in adult people diagnosed with AA in a contemporary real-world population at diagnosis compared with matched controls without AA.

#### 2.2.3.2

Describe the incidence of atopic and autoimmune conditions in adult people with AA in a contemporary real-world population compared with matched controls in the first five years after AA diagnosis.

### 2.2.4 Study 4

#### 2.2.4.1

Describe the overall rate of common infections in people with AA in a contemporary real-world population at diagnosis compared with matched controls in the first five years after AA diagnosis.

#### 2.2.4.2

1 Describe the rates of individual common infections in people with AA in a contemporary  
2 real-world population at diagnosis compared with matched controls in the first five years  
3 after AA diagnosis.  
4  
5

## 6 **2.3 Secondary objectives:**

### 8 **2.3.1 Study 1**

#### 10 **2.3.1.1**

11 Describe the geographic distribution of AA incidence within England. English regions  
12 comprise; Greater London, South East, South West, West Midlands, North West, North East,  
13 Yorkshire and the Humber, East Midlands, and East of England.  
14  
15

### 16 **2.3.2 Study 2**

#### 18 **2.3.2.1**

19 Describe the prevalence of additional mental health conditions (adjustment disorder,  
20 agoraphobia, self-harm, and overdose/parasuicide attempts) in adult people diagnosed  
21 with AA and controls.  
22  
23

#### 24 **2.3.2.2**

25 Describe the burden of 'sick days' in adult people diagnosed with AA and controls.  
26  
27

#### 28 **2.3.2.3**

29 Describe the prevalence of unemployment in adult people diagnosed with AA and controls.  
30  
31

### 32 **2.3.3 Study 3**

33 None  
34

### 35 **2.3.4 Study 4**

36 None  
37  
38  
39  
40  
41  
42  
43  
44  
45  
46  
47  
48  
49  
50  
51  
52  
53  
54  
55  
56  
57  
58  
59  
60

## 2.4 Primary endpoint

The primary endpoints for the four studies are listed in Table 1.

| Study | Endpoints                                                                                                                                                                                                                                                                                                                                                                                                                                                                                                                                                                                                                                                                                                                                                                  |
|-------|----------------------------------------------------------------------------------------------------------------------------------------------------------------------------------------------------------------------------------------------------------------------------------------------------------------------------------------------------------------------------------------------------------------------------------------------------------------------------------------------------------------------------------------------------------------------------------------------------------------------------------------------------------------------------------------------------------------------------------------------------------------------------|
| 1     | Diagnosis of AA is the date of the first diagnosis code in the record and no alternative diagnosis that merits exclusion* diagnosed in the subsequent 365 days from date of AA diagnosis (see Supplementary Table S1.1, Additional file 2).                                                                                                                                                                                                                                                                                                                                                                                                                                                                                                                                |
| 2     | Diagnosis of AA is the date of the first diagnosis code in the record and no alternative diagnosis that merits exclusion* diagnosed in the subsequent 365 days from date of AA diagnosis (see Supplementary Table S1.1, Additional file 2).<br><br>Diagnosis of a common mental health condition categorized as depressive episodes, recurrent depressive disorder or non-phobia related anxiety disorders at the time of AA diagnosis (See Supplementary Tables S2.1 - S2.4, Additional file 2).<br><br>Time to diagnosis of a common mental health condition categorized as depressive episodes, recurrent depressive disorder or non-phobia related anxiety disorders in the first two years post AA diagnosis (See Supplementary Tables S2.1 -S2.4, Additional file 2) |
| 3     | Diagnosis of AA is the date of the first diagnosis code in the record and no alternative diagnosis that merits exclusion* diagnosed in the subsequent 365 days from date of AA diagnosis (see Supplementary Table S1.1, Additional file 2).<br><br>Diagnosis of an atopic (atopic dermatitis, allergic rhinitis, asthma) or autoimmune condition (Supplementary Tables S4.1 – S4.16, Additional file 2) at the time of AA diagnosis.<br><br>Time to diagnosis of an atopic (atopic dermatitis, allergic rhinitis, asthma) or autoimmune condition (Supplementary Tables S4.1 – S4.16, Additional file 2) in the first five years after AA diagnosis.                                                                                                                       |
| 4     | Diagnosis of AA is the date of the first diagnosis code in the record and no alternative diagnosis that merits exclusion* diagnosed in the subsequent 365 days from date of AA diagnosis (see Supplementary Table S1.1, Additional file 2).<br><br>Diagnosis of a common infection (Upper and lower respiratory tract infection, Pneumonia, Acute bronchitis, Influenza, Skin infection, Urinary tract infection, Genital infections, Gastrointestinal infection, Herpes simplex , Herpes zoster, Meningitis and Covid-19 (depending on data availability)) (Supplementary Tables S5.1 – S5.12, Additional file 2) in the first five years after AA diagnosis.                                                                                                             |

**Table 1:** Primary endpoints. \*Exclusion diagnoses are; any form of scarring alopecia, (53) traction alopecia, congenital alopecia, androgenetic alopecia, telogen effluvium, tinea capitis, trichotillomania, or secondary syphilis of the scalp (See Supplementary Table S1.1, Additional file 2)

## 2.5 Secondary endpoints

None

## 2.6 Other exploratory analyses

Study 1: Explore the incidence of AA by age (children) and age group (adults [18-30], [30-40], [50-60], [60,70], [70-80],  $\geq 80$ ). These age groups are provisional. If, during exploratory analysis, we find that these age groups obscure the true incidence of AA (for example if AA incidence rates change substantially across one of these age groups) then we may modify these groupings. Any changes will be clearly stated as such in a final manuscript.

## 3 General Study Design and Plan

The proposed studies will use the retrospectively collected data of all eligible patients within Oxford-Royal College of General Practitioners Research and Surveillance Centre database (RCGP RSC) at the date of data extraction. The RCGP RSC database incorporates pseudonymised primary care records from up to 200 GP practices distributed across England. Details of the cohort included in the database have been published previously. (54) The RCGP RSC cohort size (as of January 2019) is over 2.6 million actively registered patients, and historic records available for up to 5.2 million patients over the last 20 years. The cohort provides a broadly representative sample of the UK population.

The study period for study 2 and study 3 incidence analyses will be ten-years starting January 1, 2009 and ending December 31, 2018 inclusive.

For study 4, we will start data collection from the beginning of 2004 when the quality and outcomes framework was first introduced in primary care. The study period will end December 31, 2018.

### 3.1 Study Design

These are non-interventional studies. A range of study designs will be used across the studies as follows:

#### 3.1.1 Study 1:

Cross-sectional design (incidence and prevalence of AA). Cohort design to assess healthcare utilisation in people with AA.

#### 3.1.2 Study 2:

Case-control design for prevalence of mental health conditions (depressive episodes, recurrent depressive disorder and anxiety disorder) at AA diagnosis. Matched-cohort design for incidence of such conditions in the first two years after AA diagnosis in the subset of adult people diagnosed with AA without a mental health condition at baseline (and excluding controls if they have a baseline mental health condition).

#### 3.1.3 Study 3:

Case-control design for prevalence of atopic and autoimmune conditions at AA diagnosis. Matched-cohort design for incidence of atopic and autoimmune conditions in the first five years after AA diagnosis in the subset of adult people diagnosed with AA without an atopic/autoimmune condition at baseline (and excluding controls if they have a baseline atopic/autoimmune condition).

### 3.1.4 Study 4:

Matched-cohort design for incidence of common infections in the first five years after AA diagnosis in the subset of people diagnosed with AA without a common infection at baseline (and excluding controls if they have a baseline common infection).

## 3.2 Data source and Read codes

The case and control cohorts will be identified from the RCGP RSC database. The RCGP RSC database contains complete data on all events and clinical entities coded in UK primary care. These include demographic information, clinical diagnoses, laboratory test results, primary care issued prescriptions, process of care codes (e.g. specialist dermatology reviews), and anthropometric measurements (e.g., body mass index (BMI)), and are coded using the Read Coding system. (55) Read code lists used to define variables have been developed in accordance with published guidelines. (55)

## 3.3 Data extraction

Individual patient data will be anonymised at the point of data extraction. All data will remain in anonymised form and will be held on a secure server at the University of Surrey. The data will not be used for any purposes other than for the research which is described in the respective protocols and which has been approved by the RCGP RSC Research Committee. The sponsor, Pfizer Ltd, will not have access to the individual anonymised patient data.

Queries will be executed to extract relevant data from the Structured Query Language (SQL) database using the Read code listed in Additional file 2.

## 3.4 Inclusion-Exclusion Criteria and General Study Population

### 3.4.1 AA definition

We will identify people diagnosed with AA using diagnosis Read codes which are specific to the condition (see Supplementary Table S1.1 (AA section), Additional file 2). A person will be considered to have a confirmed AA diagnosis if they have one or more of these diagnoses Read codes and no code for an alternative diagnosis in the subsequent 365 days. Alternative diagnoses which merit exclusion comprise any form of scarring alopecia, (53) traction alopecia, congenital alopecia, androgenetic alopecia, telogen effluvium, tinea capitis, trichotillomania, or secondary syphilis of the scalp (see Supplementary Table S1.1, Additional file 2). We will identify all incident cases of AA meeting this case definition over the study period which will form the case cohorts for the four studies. We will also extract data on the extent of the alopecia where this has been recorded (See Supplementary Table S1.2, Additional file 2).

Study 2 will identify three groups of common mental health conditions defined by the International Statistical Classification of Diseases and Related Health Problems 10th Revision (ICD10) classification (56) (depressive episodes (F32), recurrent depressive disorder (F33), and non-phobia related anxiety disorders (F41)) identified using algorithms validated in UK primary care. (57)

Study 3 will identify atopic conditions and autoimmune conditions respectively (Supplementary Tables S4.1 – S4.16, Additional file 2) using diagnostic Read codes.



Autoimmune conditions were selected based on a combination of expert knowledge and a minimum background population prevalence of 0.3% in the general population (refer to section 4.1.3). Case definition using Read codes for atopic dermatitis has been previously validated. An ontologically driven case definition is used for both allergic rhinitis and asthma. (55)

Study 4 will identify common infections using diagnostic Read codes (Supplementary Tables S5.1 – S5.12, Additional file 2).

### 3.5 Baseline socio-economic characteristics

Age, sex, socio-economic status (SES), and ethnicity will comprise the socio-economic factors used for stratification of the outcome measures. Ethnicity will be categorized as follows in accordance with the major UK census categories: (58, 59) White, Asian, Black African/Caribbean, Mixed, Other and not recorded. Deprivation will be defined using the official national deprivation measure; index of multiple deprivation (IMD). (60) This will be calculated at the point of data extraction, using patient postcode, with the resultant scores stratified by deprivation quintile according to the national distribution.

### 3.6 Epidemiology of AA

This will comprise of the incidence of AA over the study period (stratified by age group, sex ethnicity, and SES) and point prevalence (stratified by age and sex). The study will also describe the geographic distribution of AA by region across England.

### 3.7 Current service utilisation and management patterns

Current service utilisation will comprise of annual primary care visit rates, in Study 1 we will compare primary care visit frequency in people with AA and matched controls without AA.

The management patterns will comprise of an assessment of the percentage of the people with AA having a secondary care review (by dermatology (study 1) or mental health services (study 2)), and an assessment of primary care medication prescriptions issued to treat AA (Supplementary Table S1.4, Additional file 2). Primary care visits, secondary care reviews and medication to treat AA will all be limited to those within 365 days of AA diagnosis.

### 3.8 Mental health treatment, sick day, and unemployment burden

This will comprise of the rates for medications and psychological interventions used to treat mental health conditions in people diagnosed with AA. Antidepressant medication classes to be examined comprise; selective serotonin reuptake inhibitors (SSRIs) and related medications (serotonin and norepinephrine reuptake inhibitors; SNRIs), tricyclic antidepressants (TCAs) and related medications (tetracyclic antidepressant TeCAs), and monoamine oxidase inhibitors (MOAIs). Anxiolytic medications to be examined comprise all benzodiazepines and other related medications indicated for use in anxiety states. Psychological interventions comprise of will comprise; referral rates for counselling, secondary care psychiatrist referrals, including the referrals to the clinical psychology services/specialists and UK Improving Access to Psychological Therapies (IAPT) program. (61) (Supplementary Table S2.10, Additional file 2).

1 Additional mental health conditions consist of adjustment disorder, agoraphobia, self-harm,  
2 and overdose/parasuicide attempts and will be identified using the presence of one or more  
3 diagnosis codes appearing in the clinical record (Supplementary Tables S2.5 – S2.9,  
4 Additional file 2).

5  
6 Unemployment will be identified using Read codes relating to unemployment recorded in  
7 the primary care record or the issuing of IB113 or ESA113 forms (Supplementary Table S3.1,  
8 Additional file 2). Sick days will be indicated by the issuing of Med 3 certification from  
9 primary care (Statement of Fitness for Work certification) (Supplementary Table S3.2,  
10 Additional file 2).

## 14 4 Sample size calculations

15  
16 In the controls, the prevalence of common conditions (e.g. depressive episodes) is assumed  
17 to be 10%, less common conditions are assumed to be 1% and rare conditions (e.g. multiple  
18 sclerosis) assumed to be 0.1%. Sample size calculations were performed in OpenEpi, (62)  
19 results are presented using methods of Kelsey.(63)

### 21 4.1.1 Study 1

22  
23 The analysis of the primary endpoint is a descriptive analysis of the incidence and  
24 prevalence of AA, and no sample size calculation is therefore applicable.

25  
26 Our inclusion criteria specify all people with a confirmed diagnosis of AA will be included  
27 for analysis. The RCGP RSC database contains information on around 2 million actively  
28 registered patients. Based on an AA prevalence of 0.2% (13), we would anticipate a sample  
29 size of around 4,000 people diagnosed with AA for this study.

### 32 4.1.2 Study 2

33  
34 Assuming 80% power, a 5% level of statistical significance, and a background population  
35 prevalence of 15% for anxiety and 10% for depression, (64) our anticipated sample size for  
36 AA (n = 4,000) would be sufficient to detect a prevalence difference of 1.8% in anxiety  
37 between those with and without AA, and 1.5% difference in depression between those with  
38 and without AA.

### 41 4.1.3 Study 3

42  
43 A sample size calculation is applicable to estimate the incidence of atopic and autoimmune  
44 conditions in people diagnosed with AA. There is, however, a paucity of large-scale  
45 epidemiological data exploring the association between AA and either atopic or  
46 autoimmune conditions on which to base the sample size calculations for this study.

47  
48 A large population-based study based in Taiwan (65) found associations between the  
49 presence of AA and the presence of atopic dermatitis (OR 2.24, 95% CI 1.95-2.58) and  
50 allergic rhinitis (OR 1.29, 95% CI 1.18-1.41), and with the autoimmune condition psoriasis  
51 (OR 2.80, 95% CI 2.24-3.50). No associations were found in either asthma (atopic) or RA  
52 (autoimmune). Applying an estimate informed by this study of OR 2.0 for atopic conditions  
53 and OR 2.8 for autoimmune conditions, assuming 80% power, a 5% level of statistical  
54 significance, a 4:1 ratio of controls to cases and a probability of outcome in the control  
55 cohort of 1% (less common condition prevalence) for both atopic and autoimmune  
56 conditions, a total (both cases and controls) sample size of 6,034 for atopic conditions  
57 (1,207 cases and 4,827 controls) and 2,133 for autoimmune conditions (427 cases and  
58  
59  
60



1,706 controls) would be required to detect statistically significant differences between people diagnosed with AA and the control populations.

For the assessment of prevalence of co-existing autoimmune conditions, assuming 80% power, a 5% level of statistical significance, our anticipated sample size for AA (n = 4,000) and an OR 2.0 effect, we would have sufficient power to detect a difference between those with and without AA in autoimmune conditions having  $\geq 0.3\%$  background population prevalence.

#### 4.1.4 Study 4

A sample size calculation is applicable to estimate the incidence of common infections in people diagnosed with AA. There is, however, no previous data exploring the association between AA and common infections on which to base the sample size calculations for this study. We therefore estimate the number of people diagnosed with AA we will have for this study (n = 4,000) and use this number to estimate the minimum effect size we are powered to detect. Based on a Cox PH model, 80% power, a 5% level of statistical significance and a 4:1 ratio of controls to cases, we would have sufficient power to detect a difference between those with and without AA in common infections having  $\geq 0.46\%$  background population prevalence.

## 5 Populations to be analysed

### 5.1 Inclusion Criteria

The cohorts for studies 1, 2 and 3 (cases and controls) will consist of patients contributing to RCGP RCS database during the study period (between January 1, 2009 and December 31, 2018 inclusive). The cohorts for study 4 (cases and controls) will consist of patients contributing to RCGP RCS database between January 1, 2004 and December 31, 2018 inclusive.

The AA prevalence population consists of patients actively registered and alive at the end date of the study period (December 31, 2018).

The AA incidence population consists of patients registered at any point during the study period but without a prior recorded AA diagnosis. The follow-up period for incident cases will begin on the latest of the date of diagnosis indicated by the first diagnostic AA Read code. Follow-up will end at the earliest of the study end-date (December 31, 2018), the date of patient transfer from an included practice or date of death.

Studies 1 and 4 will include both children and adults. Studies 2 and 3 will include only people aged  $\geq 18$  (as at date of AA diagnosis for cases or start of follow-up for controls). Only people aged  $\geq 18$  and  $\leq 65$  will be included in the unemployment and sick day analysis (Study 2).

### 5.2 Exclusion Criteria

The following exclusion criteria will be applied:

- People with the alternative non-AA diagnoses (section 3.4.1) (AA incidence cohort).
- People with AA diagnosis within 6 months of registration (AA incidence cohort).
- People with less than 1 year of follow up within the dataset (unless under 1 year old) (AA incidence and AA prevalence cohorts).

### 5.3 Matching process

The control cohorts will be defined by matching cases with people who have never been diagnosed with AA either prior to or during the study period, by age, sex, and time since practice registration, at GP practice level. After matching an assessment of sociodemographic differences using IMD quintiles will be performed. If there are substantial differences in socioeconomic status between cases and controls, re-matching with IMD as an additional matching criterion will be considered

Controls will require at least one year of follow-up when matched to minimize the risk of a non-recorded existing diagnosis of AA. The follow-up period for each matched control will begin at the start of follow-up of their matched case and have the same follow-up time criteria applied (where applicable).

Each case is matched with four controls using a nearest neighbour matching algorithm (66) to create a baseline matched dataset.

Study 1 will include all matched patients to compare rates of primary care visits. Study 2 (incidence of mental health after AA diagnosis) and study 3 (incidence of atopic and autoimmune conditions) will both use a subset of the baseline matched dataset; cases will be people diagnosed with AA without the relevant condition at their start of follow up, controls will be people not diagnosed with AA and without the relevant condition at their start of follow up.

The matching for the incidence of common infections (study 4) will use a different approach to studies 2 and 3: cases will be people diagnosed with AA on or before 1<sup>st</sup> January 2014 (exact date will be dependent on data availability) without the relevant infection, controls will be people not diagnosed with AA prior to this date and without the relevant infection. People who develop AA during the follow up will be excluded from the pool of available cohorts prior to matching. This approach will mitigate systematic recording bias that is likely due to an increased propensity of people with incident AA to consult within the months following diagnosis.

The case-control design studies (prevalence of mental health at AA diagnosis (study 2), and prevalence of atopic and autoimmune conditions at AA diagnosis (study 3)) will both define cases as people newly diagnosed with AA over the study period. For each case, the prevalence of the conditions of interest as at the date of AA diagnosis will be retrospectively established. Controls will be people not diagnosed with AA. For each control, the date of AA diagnosis of their matched case counterpart will then be used as the baseline date and the prevalence of the conditions of interest on that date will be retrospectively established.

In Study 2 and Study 3, the same baseline cases and control cohorts will be used for both the case-control and matched-cohort analyses.

### 5.4 AA definition exploratory analyses

To check the validity of our AA definition (section 3.4.1), annual incident trends of specified alopecia (AA), (Supplementary Table S1.1, Additional file 2), non-specific alopecia (Supplementary Table S1.1, Additional file 2) and other specified alopecia (Supplementary Table S1.1, Additional file 2) will be analysed for the purpose of identifying changes in coding practice. The AA case definition may be amended based on the results of this analysis if considered appropriate and necessary. Any changes required will be reported in full in a final study publication.

## 6 Statistical Analysis

### 6.1 Statistical principles

The mean, standard deviation (sd) and any other statistical measures, will be reported to one decimal place. Continuous data will be summarised in the form of means, sd, median, interquartile range (IQR) and range as appropriate. Categorical data will be summarised using frequencies and proportions. Chi-squared and t-tests will be performed to compare the frequency of dichotomous variables and the values of continuous variables where relevant. 95% CIs will be reported for main effect sizes. Statistical significance will be assessed using  $p < 0.05$ . Actual p-values will be reported except for p-values less than 3 decimal places which will be reported as " $< 0.001$ ". P-values  $> 0.1$  will be reported to one decimal place, p-values between 0.01 and 0.1 will be reported to 2 decimal places, and p-values between 0.001 and 0.01 will be reported to three decimal places.

The assessment of any associations with baseline characteristics and the outcomes of interest (mental health conditions (study 2), autoimmune and atopic conditions (study 3) and common infections (study 4)) will be assessed using logistic regression, Cox proportional hazards models, Poisson regression or zero-inflated Poisson regression as appropriate depending on the characteristics of the outcome variable. A standard set of features will be used in all multivariable models: age, sex, ethnicity, socioeconomic status, BMI, smoking status, alcohol status, and historical propensity to consult (defined as the number of primary care visits an individual has in the year prior to their study start date). Specific co-morbidity adjustment will be specific to each analysis.

Assumptions of statistical approaches will be assessed, and transformations used if necessary (although it is not anticipated that the data will violate model assumptions).

### 6.2 Primary Endpoint Analysis

#### 6.2.1 Study 1

**AA incidence:** Incident cases will be defined as people with a first ever diagnostic Read code for AA during the study period. To ensure cases are truly incident, people with an AA diagnosis within six months of registering with a practice will be excluded from the analysis (unless under one year old). Incidence of new onset AA will be calculated by dividing the total number of new cases by the total person-years of follow-up for the total eligible population over the study period. Incidence rates will be reported for the complete cohort and stratified by calendar year, sex and age (categorised), and SES factors. Adjusted incidence rates by socio-demographic factors (including geographic area classification) will be estimated using Poisson regression.

**AA point prevalence:** Prevalence cases will be defined as all people with a historical diagnostic Read code for AA and no exclusion code within one year of AA diagnosis. For this prevalence analysis all people will be included regardless of the date of AA diagnosis in relation to the date of registration with a practice. Cases with  $< 365$  days of follow up from date of registration will be excluded from the analysis (unless under one year old). Point prevalence will be calculated by dividing the number of prevalent cases by the total number of eligible people in the study population at the study end date (December 31, 2018). Point prevalence will be reported for the complete cohort and stratified by sex and age (categorised).

1 We anticipate some attrition of recording of AA in the historic records. This is particularly  
2 likely to be the case in records preceding the computerisation of primary care which  
3 occurred in the 1990s. If we observe evidence of this being a major source of error in our  
4 point calculations (as evidenced by a falling point incidence in the older adult population  
5 despite there being a substantial number of incident diagnoses in this age group) then we  
6 will consider using the actuarial life table method to estimate lifetime AA risk (67).  
7

8 **Service utilisation and management patterns:** Service utilisation will be evaluated by  
9 calculation of the annual rates of primary care visits for people diagnosed with AA in the  
10 year following diagnosis. Primary care visits will be identified from the patient's electronic  
11 health record.  
12

13  
14 Management patterns will be evaluated by calculation of annual proportion of people  
15 referred for dermatology review in people diagnosed with AA in the year following  
16 diagnosis. Secondary care dermatology reviews will be identified from Read codes.  
17

18  
19 In addition, management patterns will also comprise of the percentage of people diagnosed  
20 with AA and prescribed AA medication, in primary care, grouped by medication class during  
21 the year following diagnosis. Prescription information will be identified using Read and  
22 EMIS codes.  
23

## 24 6.2.2 Study 2

25  
26 **Prevalence of mental health conditions:** Prevalence will be calculated by dividing the  
27 number of prevalent people at the study start date by the total number of eligible people in  
28 the study population at the same time point.  
29

30  
31 The prevalence of each common mental health condition (depressive episodes, recurrent  
32 depressive disorder and anxiety disorder) category for people diagnosed with AA will be  
33 reported in Study 2 and compared to the prevalence in the control population without AA.  
34 The prevalence of mental health conditions by socio-demographic subgroups will also be  
35 reported.  
36

37  
38 **Incidence of mental health conditions:** Incident cases will be defined as in Study 1.  
39 Incidence rates of mental health conditions (depressive episodes, recurrent depressive  
40 disorder and anxiety disorder) within two years of diagnosis date (matched follow-up start  
41 date for controls) will be calculated in both cases and controls and compared.  
42

43  
44 Risk of developing a mental health condition (grouped by mental health condition category)  
45 will be examined using time to failure analysis. Initially, unadjusted Cox proportional  
46 hazards models, stratified by matched set (AA versus non-AA), will be used to provide  
47 overall hazard ratios (HRs) as summary estimates for the association of the presence of AA  
48 with the time to each mental health condition category in separate models. Models will be  
49 subsequently adjusted for standard set factors (section 6.1) and comorbidities (type 2  
50 diabetes (T2DM), hypertension, atrial fibrillation, angina, acute myocardial infarction,  
51 stroke, heart failure, chronic liver disease, dementia, RA, asthma, Chronic obstructive  
52 pulmonary disease, Chronic Kidney Disease stage 3-5 (CKD), malignancy and inflammatory  
53 bowel disease) in multivariable analysis.  
54

55  
56 **Mental health treatment and management patterns:** The burden of treatment for  
57 mental health conditions will be evaluated as the total percentage of people diagnosed with  
58  
59  
60

AA and prescribed, within one year of AA diagnosis, a medication used to treat mental health conditions (section 3.8) (e.g. SSRIs), grouped by mental health condition category.

Management patterns will be evaluated by calculation of annual proportion of people referred for psychiatrist referral and counselling in people diagnosed with AA in the year following diagnosis (Supplementary Table S2.10, Additional file 2).

### 6.2.3 Study 3

**Prevalence of atopic and autoimmune conditions:** The prevalence of atopic and autoimmune conditions in both cases and controls will be reported and compared.

**Incidence of atopic and autoimmune conditions:** Incidence rates of atopic and autoimmune conditions within five years of diagnosis date (matched follow-up start date for controls) will be calculated in both cases and controls and compared.

Risk of developing an atopic or autoimmune condition will be examined using time to failure analysis. Initially, unadjusted Cox proportional hazards models, stratified by matched set (AA versus non-AA), will be used to provide overall HRs as summary estimates for the association of the presence of AA with the time to each of atopic and autoimmune conditions in separate models. Models will be subsequently adjusted for standard set factors (section 6.1) and comorbidities (hypertension, hyperlipidaemia, T2DM, peripheral arterial disease, atrial fibrillation, angina, myocardial infarction, stroke, heart failure, CKD, chronic obstructive pulmonary disorder (COPD), chronic liver disease, malignancy, dementia, fracture history, depression) in multivariable analysis.

### 6.2.4 Study 4

**Incidence of common infections:** Incidence rates of common infections within five years of diagnosis date (matched follow-up start date for controls) will be calculated at both overall and individual infection levels in both cases and controls and compared. : Initially, infection incidence rates in people with and without AA will be estimated by dividing the number of incident common infections by the sum of person-years of follow-up for each cohort over the period of interest. Unadjusted Poisson regression models, stratified by matched set (AA versus controls), will be used to provide overall incident rate ratios as summary estimates for the association between rates of common infections and the presence of AA. Models will subsequently be adjusted for standard set factors (section 6.1) and comorbidities (hypertension, hyperlipidaemia, T2DM, peripheral arterial disease, atrial fibrillation, angina, myocardial infarction, stroke, heart failure, CKD, COPD, chronic liver disease, malignancy, dementia, RA, depression).

## 6.3 Secondary Objective Analysis

### 6.2.1 Study 1

**Geographical distribution of AA:** The geographic distribution of people with AA will be calculated from the disease incidence. The adjusted incident rate ratios will be reported. Models will be adjusted for age category, sex, ethnicity, IMD and geographic area classification derived using patient postcode at the point of data extraction.

### 6.2.2 Study 2

**Stratified prevalence of mental health conditions:** The prevalence of mental health conditions (depressive episodes, recurrent depressive disorder and anxiety disorder) by sociodemographic subgroups will also be reported in both cases and controls.



1 **Additional mental health conditions:** The prevalence of additional mental health  
2 conditions (adjustment disorder, agoraphobia, self-harm, and overdose/parasuicide  
3 attempts) will be estimated as the total percentage of people diagnosed with AA and with  
4 the presence of one or more diagnosis codes appearing in the clinical record  
5  
6

7 **Sick day and unemployment burden:** The burden of sick days will be estimated as the  
8 total percentage of people diagnosed with AA and issued one or more Med 3 certificate. The  
9 burden of unemployment will be estimated as the total percentage of people diagnosed with  
10 AA and with a Read code relating to unemployment recorded in the primary care record or  
11 an IB113 or ESA113 form issued.  
12  
13

### 14 6.2.3 Study 3

15 Not applicable.  
16

### 17 6.2.4 Study 4

18 Not applicable.  
19  
20  
21  
22  
23  
24

## 25 6.4 Sensitivity analysis

26  
27  
28 Study 2: Sensitivity analyses will be performed to compare the baseline prevalence and  
29 incidence over two years post alopecia diagnosis of the three primary mental health  
30 conditions (depressive episodes, recurrent depressive disorder and anxiety disorder) in  
31 people with non-specific alopecia codes only (i.e. no prior or subsequent codes specifying  
32 alopecia type) using the same matching process used for the primary analyses.  
33  
34

35 Study 3: We will replicate this sensitivity analysis to compare the baseline prevalence and  
36 incidence of atopic and autoimmune conditions in people with non-specific alopecia codes  
37 only.  
38  
39

40 Study 4: In the common infections theme, we will use a survival model to investigate time  
41 to first infection. We will also compare the results of the study outcomes when 1) we  
42 increase the number of cases to include people who develop AA during the follow up and 2)  
43 use a similar matching approach to the other studies: perform matching using the time of  
44 AA diagnosis and follow for up to five years after diagnosis (or matched date for controls).  
45 Both of these approaches will be used to investigate the effect of bias.  
46  
47  
48

## 49 6.5 Missing data

50 These studies will use the missing indicator variable method as missing data are considered  
51 likely not to be missing at random, meaning multiple imputation approaches will lack  
52 validity.  
53  
54

55 Patient will need to be excluded from analyses based on a matched design if they have  
56 incomplete data in the fields (age, sex) required to run the matching process. In similar  
57 studies, the exclusion rate due to incomplete data has been low (68, 69).  
58  
59  
60

## 7 Study Limitations

These are discussed in the associated protocol manuscript.

## 8 Statistical software

All statistical analyses will be performed using R software.

## 9 Ethics

Study approval will be requested from the Research Committee of the RCGP RSC. These studies do not meet the requirements for formal ethics board review in their current form as defined using the NHS Health Research Authority research decision tool (<http://www.hra-decisiontools.org.uk/research/>).

The study will be conducted in accordance with legal and regulatory requirements, as well as with scientific purpose, value, and rigor and follow generally accepted research practices described in Guidelines for Good Pharmacoepidemiology Practices (GPP) issued by the International Society for Pharmacoepidemiology (ISPE), and Good Epidemiological Practice (GEP) guidelines issued by the International Epidemiological Association (IEA). Study reporting will be conducted in accordance with the relevant EQUATOR (Enhancing the QUALity and Transparency Of health Research) guidelines.

## 10 Acknowledgements

Medical writing support was provided by Louise Jordan at Momentum Data and was funded by Pfizer. Editorial support was provided by Anita Lynam, Andrew McGovern, and John Dennis at Momentum Data and was funded by Pfizer. The authors would like to acknowledge project management support from Filipa Ferreira of the University of Oxford and University of Surrey. Matthew Harries was supported by the NIHR Manchester.

## References

1. Hordinsky MK. Overview of alopecia areata. *J Investig Dermatol Symp Proc.* 2013;16(1):S13-5.
2. Alkhalifah A, Alsantali A, Wang E, McElwee KJ, Shapiro J. Alopecia areata update: part I. Clinical picture, histopathology, and pathogenesis. *Journal of the American Academy of Dermatology.* 2010;62(2):177-88, quiz 89-90.
3. Madani S, Shapiro J. Alopecia areata update. *Journal of the American Academy of Dermatology.* 2000;42(4):549-66; quiz 67-70.
4. Mirzoyev SA, Schrum AG, Davis MDP, Torgerson RR. Lifetime incidence risk of alopecia areata estimated at 2.1% by Rochester Epidemiology Project, 1990-2009. *J Invest Dermatol.* 2014;134(4):1141-2.
5. Villasante Fricke AC, Miteva M. Epidemiology and burden of alopecia areata: a systematic review. *Clin Cosmet Investig Dermatol.* 2015;8:397-403.
6. Richard MA, Corgibet F, Beylot-Barry M, Barbaud A, Bodemer C, Chaussade V, et al. Sex- and age-adjusted prevalence estimates of five chronic inflammatory skin diseases in France: results of the << OBJECTIFS PEAU >> study. *J Eur Acad Dermatol Venereol.* 2018;32(11):1967-71.
7. Harries MJ, Sun J, Paus R, King LE. Management of alopecia areata. *BMJ.* 2010;341:c3671.
8. Cochrane. Treatments for alopecia areata, alopecia totalis and alopecia universalis. 2008.
9. Lee S, Lee H, Lee CH, Lee WS. Comorbidities in alopecia areata: A systematic review and meta-analysis. *Journal of the American Academy of Dermatology.* 2019;80(2):466-77.e16.
10. Huang KP, Mullangi S, Guo Y, Qureshi AA. Autoimmune, atopic, and mental health comorbid conditions associated with alopecia areata in the United States. *JAMA Dermatol.* 2013;149(7):789-94.
11. Montgomery K, White C, Thompson A. A mixed methods survey of social anxiety, anxiety, depression and wig use in alopecia. *BMJ open.* 2017;7(4):e015468.
12. Hunt N, McHale S. The psychological impact of alopecia. *BMJ.* 2005;331(7522):951-3.
13. Safavi K. Prevalence of alopecia areata in the First National Health and Nutrition Examination Survey. *Arch Dermatol.* 1992;128(5):702.
14. Sharma VK, Dawn G, Kumar B. Profile of alopecia areata in Northern India. *Int J Dermatol.* 1996;35(1):22-7.
15. Tan E, Tay YK, Goh CL, Chin Giam Y. The pattern and profile of alopecia areata in Singapore--a study of 219 Asians. *Int J Dermatol.* 2002;41(11):748-53.
16. Yang S, Yang J, Liu JB, Wang HY, Yang Q, Gao M, et al. The genetic epidemiology of alopecia areata in China. *Br J Dermatol.* 2004;151(1):16-23.
17. Guzmán-Sánchez DA, Villanueva-Quintero GD, Alfaro Alfaro N, McMichael A. A clinical study of alopecia areata in Mexico. *Int J Dermatol.* 2007;46(12):1308-10.
18. Furue M, Yamazaki S, Jimbow K, Tsuchida T, Amagai M, Tanaka T, et al. Prevalence of dermatological disorders in Japan: a nationwide, cross-sectional, seasonal, multicenter, hospital-based study. *J Dermatol.* 2011;38(4):310-20.
19. Singam V, Patel KR, Lee HH, Rastogi S, Silverberg JI. Association of alopecia areata with hospitalization for mental health disorders in US adults. *Journal of the American Academy of Dermatology.* 2019;80(3):792-4.
20. Sellami R, Masmoudi J, Ouali U, Mnif L, Amouri M, Turki H, et al. The relationship between alopecia areata and alexithymia, anxiety and depression: a case-control study. *Indian J Dermatol.* 2014;59(4):421.
21. Ruiz-Doblado S, Carrizosa A, García-Hernández MJ. Alopecia areata: psychiatric comorbidity and adjustment to illness. *Int J Dermatol.* 2003;42(6):434-7.
22. Baghestani S, Zare S, Seddigh SH. Severity of Depression and Anxiety in Patients with Alopecia Areata in Bandar Abbas, Iran. *Dermatol Reports.* 2015;7(3):6063.



23. Chu SY, Chen YJ, Tseng WC, Lin MW, Chen TJ, Hwang CY, et al. Psychiatric comorbidities in patients with alopecia areata in Taiwan: a case-control study. *Br J Dermatol*. 2012;166(3):525-31.
24. Vallerand IA, Lewinson RT, Parsons LM, Hardin J, Haber RM, Lowerison MW, et al. Assessment of a Bidirectional Association Between Major Depressive Disorder and Alopecia Areata. *JAMA Dermatol*. 2019.
25. Paus R, Ito N, Takigawa M, Ito T. The hair follicle and immune privilege. *J Investig Dermatol Symp Proc*. 2003;8(2):188-94.
26. Barahmani N, Schabath MB, Duvic M. History of atopy or autoimmunity increases risk of alopecia areata. *Journal of the American Academy of Dermatology*. 2009;61(4):581-91.
27. Chen C-H, Wang K-H, Lin H-C, Chung S-D. Follow-up study on the relationship between alopecia areata and risk of autoimmune diseases. *The Journal of Dermatology*. 2016;43(2):228-9.
28. Tosti A. Practice gaps. Alopecia areata and comorbid conditions. *JAMA Dermatol*. 2013;149(7):794.
29. Tan E, Tay YK, Giam YC. A clinical study of childhood alopecia areata in Singapore. *Pediatr Dermatol*. 2002;19(4):298-301.
30. Jagielska D, Redler S, Brockschmidt FF, Herold C, Pasternack SM, Garcia Bartels N, et al. Follow-up study of the first genome-wide association scan in alopecia areata: IL13 and KIAA0350 as susceptibility loci supported with genome-wide significance. *J Invest Dermatol*. 2012;132(9):2192-7.
31. Bhardwaj EK, Trüeb RM. Acute diffuse and total alopecia of the female scalp associated with borrelia-infection. *International journal of trichology*. 2015;7(1):26-8.
32. Cho M, Cohen PR, Duvic M. Vitiligo and alopecia areata in patients with human immunodeficiency virus infection. *Southern medical journal*. 1995;88(4):489-91.
33. Gil Montoya JA, Cutando Soriano A, Jimenez Prat J. Alopecia areata of dental origin. *Medicina oral : organo oficial de la Sociedad Espanola de Medicina Oral y de la Academia Iberoamericana de Patologia y Medicina Bucal*. 2002;7(4):303-8.
34. Ito T, Tokura Y. Alopecia areata triggered or exacerbated by swine flu virus infection. *The Journal of dermatology*. 2012;39(10):863-4.
35. Jackow C, Puffer N, Hordinsky M, Nelson J, Tarrand J, Duvic M. Alopecia areata and cytomegalovirus infection in twins: genes versus environment? *Journal of the American Academy of Dermatology*. 1998;38(3):418-25.
36. Offidani A, Amerio P, Bernardini ML, Feliciani C, Bossi G. Role of cytomegalovirus replication in alopecia areata pathogenesis. *Journal of cutaneous medicine and surgery*. 2000;4(2):63-5.
37. Paoletti V, Mammarella A, Basili S, Paradiso M, Di Franco M, De Matteis A, et al. Prevalence and clinical features of skin diseases in chronic HCV infection. A prospective study in 96 patients. *Panminerva medica*. 2002;44(4):349-52.
38. Richardson CT, Hayden MS, Gilmore ES, Poligone B. Evaluation of the Relationship between Alopecia Areata and Viral Antigen Exposure. *American journal of clinical dermatology*. 2018;19(1):119-26.
39. Kartal ED, Alpat SN, Ozgunes I, Usluer G. Reversible alopecia universalis secondary to PEG-interferon alpha-2b and ribavirin combination therapy in a patient with chronic hepatitis C virus infection. *European journal of gastroenterology & hepatology*. 2007;19(9):817-20.
40. Abdel Hafez HZ, Mahran AM, Hofny EM, Attallah DAA, Sayed DS, Rashed H. Alopecia areata is not associated with *Helicobacter pylori*. *Indian journal of dermatology*. 2009;54(1):17-9.
41. Domínguez-Andrés J, Netea MG. Impact of Historic Migrations and Evolutionary Processes on Human Immunity. *Trends in Immunology*. 2019;40(12):1105-19.
42. Dubois PC, Trynka G, Franke L, Hunt KA, Romanos J, Curtotti A, et al. Multiple common variants for celiac disease influencing immune gene expression. *Nat Genet*. 2010;42(4):295-302.

- 1 43. Hung SC, Hou T, Jiang W, Wang N, Qiao SW, Chow IT, et al. Epitope Selection for HLA-  
2 DQ2 Presentation: Implications for Celiac Disease and Viral Defense. *J Immunol.*  
3 2019;202(9):2558-69.
- 4 44. Zhernakova A, Elbers CC, Ferwerda B, Romanos J, Trynka G, Dubois PC, et al.  
5 Evolutionary and functional analysis of celiac risk loci reveals SH2B3 as a protective factor  
6 against bacterial infection. *Am J Hum Genet.* 2010;86(6):970-7.
- 7 45. Kucharzik T, Maaser C. Infections and Chronic Inflammatory Bowel Disease.  
8 *Viszeralmedizin.* 2014;30(5):326-32.
- 9 46. Toruner M, Loftus EV, Jr., Harmsen WS, Zinsmeister AR, Orenstein R, Sandborn WJ, et  
10 al. Risk factors for opportunistic infections in patients with inflammatory bowel disease.  
11 *Gastroenterology.* 2008;134(4):929-36.
- 12 47. Brassard P, Bitton A, Suissa A, Sinyavskaya L, Patenaude V, Suissa S. Oral  
13 Corticosteroids and the Risk of Serious Infections in Patients With Elderly-Onset Inflammatory  
14 Bowel Diseases. *The American journal of gastroenterology.* 2014;109:1795.
- 15 48. Lichtenstein GR, Feagan BG, Cohen RD, Salzberg BA, Diamond RH, Chen DM, et al.  
16 Serious infections and mortality in association with therapies for Crohn's disease: TREAT registry.  
17 *Clinical gastroenterology and hepatology : the official clinical practice journal of the American*  
18 *Gastroenterological Association.* 2006;4(5):621-30.
- 19 49. Lichtenstein GR, Feagan BG, Cohen RD, Salzberg BA, Diamond RH, Price S, et al.  
20 Serious infection and mortality in patients with Crohn's disease: more than 5 years of follow-up  
21 in the TREAT registry. *The American journal of gastroenterology.* 2012;107(9):1409-22.
- 22 50. Fardet L, Petersen I, Nazareth I. Common Infections in Patients Prescribed Systemic  
23 Glucocorticoids in Primary Care: A Population-Based Cohort Study. *PLOS Medicine.*  
24 2016;13(5):e1002024.
- 25 51. Nikiphorou E, de Lusignan S, Mallen C, Khavandi K, Roberts J, Buckley CD, et al.  
26 Haematological abnormalities in new-onset rheumatoid arthritis and risk of common infections:  
27 a population-based study. *Rheumatology.* 2019.
- 28 52. Gilhar A, Keren A, Paus R. JAK inhibitors and alopecia areata. *The Lancet.*  
29 2019;393(10169):318-9.
- 30 53. Olsen EA, Bergfeld WF, Cotsarelis G, Price VH, Shapiro J, Sinclair R, et al. Summary of  
31 North American Hair Research Society (NAHRS)-sponsored Workshop on Cicatricial Alopecia,  
32 Duke University Medical Center, February 10 and 11, 2001. *Journal of the American Academy*  
33 *of Dermatology.* 2003;48(1):103-10.
- 34 54. Correa A, Hinton W, McGovern A, van Vlymen J, Yonova I, Jones S, et al. Royal College  
35 of General Practitioners Research and Surveillance Centre (RCGP RSC) sentinel network: a  
36 cohort profile. *BMJ open.* 2016;6(4):e011092.
- 37 55. de Lusignan S, Liaw ST, Michalakidis G, Jones S. Defining datasets and creating data  
38 dictionaries for quality improvement and research in chronic disease using routinely collected  
39 data: an ontology-driven approach. *Informatics in primary care.* 2011;19(3):127-34.
- 40 56. World Health Organisation. International Statistical Classification of Diseases and  
41 Related Health Problems 10th Revision 2016 2nd January 2020. Available from:  
42 <http://apps.who.int/classifications/icd10/browse/2016/en>.
- 43 57. John A, McGregor J, Fone D, Dunstan F, Cornish R, Lyons RA, et al. Case-finding for  
44 common mental disorders of anxiety and depression in primary care: an external validation of  
45 routinely collected data. *BMC Medical Informatics and Decision Making.* 2016;16(1):35.
- 46 58. Office for National Statistics. Ethnicity 2018 2nd January 2020. Available from:  
47 <https://www.ons.gov.uk/peoplepopulationandcommunity/culturalidentity/ethnicity>.
- 48 59. Tippu Z, Correa A, Liyanage H, Burleigh D, McGovern A, Van Vlymen J, et al. Ethnicity  
49 Recording in Primary Care Computerised Medical Record Systems: An Ontological Approach. *J*  
50 *Innov Health Inform.* 2017;23(4):920.
- 51 60. Ministry of Housing CLG. English indices of deprivation 2015: technical report 2015 2nd  
52 Jan 2020. Available from: [https://www.gov.uk/government/publications/english-indices-of-](https://www.gov.uk/government/publications/english-indices-of-deprivation-2015-technical-report)  
53 [deprivation-2015-technical-report](https://www.gov.uk/government/publications/english-indices-of-deprivation-2015-technical-report).

- 1  
2  
3  
4  
5  
6  
7  
8  
9  
10  
11  
12  
13  
14  
15  
16  
17  
18  
19  
20  
21  
22  
23  
24  
25  
26  
27  
28  
29  
30  
31  
32  
33  
34  
35  
36  
37  
38  
39  
40  
41  
42  
43  
44  
45  
46  
47  
48  
49  
50  
51  
52  
53  
54  
55  
56  
57  
58  
59  
60
61. Clark DM. Realizing the Mass Public Benefit of Evidence-Based Psychological Therapies: The IAPT Program. *Annu Rev Clin Psychol*. 2018;14:159-83.
62. Dean AG, Sullivan KM, Soe MM. OpenEpi: Open Source Epidemiologic Statistics for Public Health, Version [updated 06/04/2013. Available from: [www.OpenEpi.com](http://www.OpenEpi.com).
63. Kelsey JL, Whittemore AS, Evans AS, Thompson WD. *Methods in Observational Epidemiology* 2nd Edition, Table 12-15. New York: Oxford University Press; 1996.
64. Kessler RC, Chiu WT, Demler O, Merikangas KR, Walters EE. Prevalence, severity, and comorbidity of 12-month DSM-IV disorders in the National Comorbidity Survey Replication. *Archives of general psychiatry*. 2005;62(6):617-27.
65. Chu SY, Chen YJ, Tseng WC, Lin MW, Chen TJ, Hwang CY, et al. Comorbidity profiles among patients with alopecia areata: the importance of onset age, a nationwide population-based study. *Journal of the American Academy of Dermatology*. 2011;65(5):949-56.
66. Ho D, Imai K, King G, Stuart E. MatchIt: Nonparametric Preprocessing for Parametric Causal Inference. *Journal of Statistical Software, Articles*. 2011;42(8):1 - 28.
67. Schouten LJ, Straatman H, Kiemeny LA, Verbeek AL. Cancer incidence: life table risk versus cumulative risk. *J Epidemiol Community Health*. 1994;48(6):596-600.
68. Kumar S, de Lusignan S, McGovern A, Correa A, Hriskova M, Gatenby P, et al. Ischaemic stroke, haemorrhage, and mortality in older patients with chronic kidney disease newly started on anticoagulation for atrial fibrillation: a population based study from UK primary care. *Bmj*. 2018;360:k342.
69. Rayner LH, McGovern A, Sherlock J, Gatenby P, Correa A, Creagh-Brown B, et al. The impact of therapy on the risk of asthma in type 2 diabetes. *Clin Respir J*. 2019;13(5):299-305.

## Additional File 2

### The epidemiology, management, and the associated burden of mental health illness, atopic and autoimmune conditions, and common infections in alopecia areata: Protocol for an observational study series

Dr Matthew Harries, Dr Abby Macbeth, Dr Susan Holmes, Professor Andrew R Thompson, Dr Wing Sin Chui, Dr William Romero Gallardo, Professor Andrew G Messenger, Dr Christos Tziotzios, Professor Simon de Lusignan

## Codes used to define alopecia areata and related clinical conditions, dermatology referrals, and treatments for alopecia areata which may be issued in primary care

**Supplementary table S1.1.** Read codes to be used to identify cases of alopecia areata, non-specified alopecia and alternative diagnoses (exclusion diagnoses).

| <b>Alopecia Areata</b>       |                |                           |
|------------------------------|----------------|---------------------------|
| <b>Read V2 Code</b>          | <b>Term ID</b> | <b>Description</b>        |
| M2401                        | All            | Alopecia areata           |
| M240B                        | All            | Alopecia totalis          |
| M240K                        | All            | Alopecia universalis      |
| M240U                        | All            | Ophiasis                  |
| Myu62                        | All            | [X]Other alopecia areata  |
| <b>Read CTV3 Code</b>        | <b>Term ID</b> | <b>Description</b>        |
| XE1BH                        | All            | Alopecia areata           |
| M240D                        | All            | Ophiasic alopecia areata  |
| M240B                        | All            | Total alopecia areata     |
| X509h                        | All            | Alopecia universalis      |
| X590h                        | All            | Universal alopecia areata |
| Myu62                        | All            | [x]Other alopecia areata  |
| <b>Non-specific alopecia</b> |                |                           |
| <b>Read V2 Code</b>          | <b>Term ID</b> | <b>Description</b>        |
| M240.                        | All            | Alopecia                  |
| M2400                        | All            | Alopecia unspecified      |
| M2408                        | All            | Alopecia localis          |
| M2409                        | All            | Alopecia disseminata      |
| M240z                        | All            | Alopecia NOS              |
| 22D7.                        | All            | O/E - alopecia            |
| <b>Read CTV3 Code</b>        | <b>Term ID</b> | <b>Description</b>        |
| XE2Qa                        | All            | Alopecia                  |
| X75wD                        | All            | Partial loss of hair      |
| X509c                        | All            | Non-scarring alopecia     |
| M2409                        | All            | Diffuse alopecia          |
| X509e                        | All            | Circumscribed alopecia    |
| M2408                        | All            | Alopecia localis          |
| M240z                        | All            | Alopecia NOS              |
| XE1BG                        | All            | Alopecia unspecified      |
| XM1YG                        | All            | O/E - alopecia            |

|                          |                |                                          |
|--------------------------|----------------|------------------------------------------|
| XE1h9                    | All            | O/E - patches of alopecia                |
| <b>Scarring alopecia</b> |                |                                          |
| <b>Read V2 Code</b>      | <b>Term ID</b> | <b>Description</b>                       |
| M240Q                    | All            | Pseudopelade                             |
| M147.                    | All            | Erosive pustular dermatosis of the scalp |
| M24X.                    | All            | Cicatricial alopecia, unspecified        |
| M240R                    | All            | Lichen planopilaris                      |
| M240P                    | All            | Alopecia mucinosa                        |
| M2yF.                    | All            | Follicular mucinosis                     |
| M240S                    | All            | Folliculitis decalvans                   |
| M240T                    | All            | Folliculitis ulerythematososa reticulata |
| X7055                    | All            | Linear morphoea                          |
| M2440                    | All            | Dissecting cellulitis of scalp           |
| M261K                    | All            | Acne keloidalis                          |
| M261J                    | All            | Acne necrotica                           |
| M2448                    | All            | Perifolliculitis capitis abscedens       |
| M2447                    | All            | Perifolliculitis of scalp                |
| <b>Read CTV3 Code</b>    | <b>Term ID</b> | <b>Description</b>                       |
| X509i                    | All            | Scarring alopecia                        |
| X509i                    | All            | Cicatricial alopecia                     |
| X50Eo                    | All            | Lipoedematous alopecia                   |
| X509j                    | All            | Alopecia parvimaclata                    |
| X509k                    | All            | Pseudopelade                             |
| X509l                    | All            | Tufted folliculitis                      |
| X509m                    | All            | Erosive pustular dermatosis of the scalp |
| X509n                    | All            | Traumatic alopecia                       |
| M240C                    | All            | Alopecia follicularis                    |
| Myu65                    | All            | [X]Other cicatricial alopecia            |
| Myu6E                    | All            | [X]Cicatricial alopecia, unspecified     |
| X507b                    | All            | Lichen planopilaris                      |
| X507i                    | All            | Lichen planopilaris of scalp             |
| X50Ff                    | All            | Alopecia mucinosa                        |
| XaQbR                    | All            | Follicular mucinosis                     |
| X500w                    | All            | Folliculitis decalvans                   |
| X5076                    | All            | Keratosis pilaris decalvans              |
| M21y5                    | All            | Folliculitis ulerythematososa reticulata |
| X500x                    | All            | Folliculitis keloidalis                  |
| M2104                    | All            | Linear scleroderma                       |
| M2440                    | All            | Folliculitis abscedens et suffodiens     |
| X50Es                    | All            | Acne necrotica                           |
| X50Eq                    | All            | Keloidalis nuchae                        |
| M2440                    | All            | Dissecting cellulitis of scalp           |
| M2448                    | All            | Perifolliculitis capitis abscedens       |



|                                       |                |                                                               |
|---------------------------------------|----------------|---------------------------------------------------------------|
| M2447                                 | All            | Perifolliculitis of scalp                                     |
| <b>Congenital alopecia</b>            |                |                                                               |
| <b>Read V2 Code</b>                   | <b>Term ID</b> | <b>Description</b>                                            |
| PH40.                                 | All            | Congenital alopecia                                           |
| PH400                                 | All            | Congenital alopecia, unspecified                              |
| PH401                                 | All            | Congenital localised alopecia                                 |
| PH402                                 | All            | Congenital generalised alopecia                               |
| PH40z                                 | All            | Congenital alopecia NOS                                       |
| <b>Read CTV3 Code</b>                 | <b>Term ID</b> | <b>Description</b>                                            |
| XE1MR                                 | All            | Congenital alopecia                                           |
| X78De                                 | All            | Total congenital alopecia                                     |
| X78Df                                 | All            | Congenital alopecia with keratin cysts                        |
| PH401                                 | All            | Congenital localised alopecia                                 |
| PH40z                                 | All            | Congenital alopecia NOS                                       |
| XE1MS                                 | All            | Congenital generalised alopecia                               |
| PH400                                 | All            | Congenital alopecia, unspecified                              |
| <b>Traction or traumatic alopecia</b> |                |                                                               |
| <b>Read V2 Code</b>                   | <b>Term ID</b> | <b>Description</b>                                            |
| M240V                                 | All            | Traction alopecia                                             |
| <b>Read CTV3 Code</b>                 | <b>Term ID</b> | <b>Description</b>                                            |
| Ua1AS                                 | All            | Traction alopecia                                             |
| X509n                                 | All            | Traumatic alopecia                                            |
| X503h                                 | All            | Friction alopecia                                             |
| <b>Androgenetic alopecia</b>          |                |                                                               |
| <b>Read V2 Code</b>                   | <b>Term ID</b> | <b>Description</b>                                            |
| M2402                                 | All            | Male pattern alopecia                                         |
| M2403                                 | All            | Frontal alopecia of women                                     |
| 7G140                                 | All            | Hair bearing skin flap to scalp for male pattern baldness     |
| 7G1E.                                 | All            | Hair bearing graft of skin to scalp for male pattern baldness |
| 7G1E0                                 | All            | Hair bearing punch graft to scalp for male pattern baldness   |
| 7G1E1                                 | All            | Hair bearing strip graft to scalp for male pattern baldness   |
| 7G1E2                                 | All            | Hair bearing graft to scalp for male pattern baldness NEC     |
| <b>Read CTV3 Code</b>                 | <b>Term ID</b> | <b>Description</b>                                            |
| M2402                                 | Y50P7          | Androgenetic alopecia                                         |
| M2402                                 | Y50P8          | Male pattern alopecia                                         |
| M2402                                 | Y57P9          | Male pattern baldness                                         |
| M2402                                 | Y57PA          | Pattern baldness                                              |
| M2403                                 | All            | Frontal alopecia of women                                     |
| X509f                                 | All            | Involutional alopecia                                         |
| 7G140                                 | All            | Hair bearing skin flap to scalp for male pattern baldness     |

|                           |                |                                                               |
|---------------------------|----------------|---------------------------------------------------------------|
| 7G1E0                     | All            | Hair bearing punch graft to scalp for male pattern baldness   |
| XM1JM                     | All            | Hair bearing graft of skin to scalp for male pattern baldness |
| 7G1E2                     | All            | Hair bearing graft to scalp for male pattern baldness NEC     |
| 7G1E1                     | All            | Hair bearing strip graft to scalp for male pattern baldness   |
| <b>Telogen effluvium</b>  |                |                                                               |
| <b>Read V2 Code</b>       | <b>Term ID</b> | <b>Description</b>                                            |
| M240M                     | All            | Telogen effluvium                                             |
| <b>Read CTV3 Code</b>     | <b>Term ID</b> | <b>Description</b>                                            |
| X509q                     | All            | Telogen effluvium                                             |
| <b>Anagen effluvium</b>   |                |                                                               |
| <b>Read V2 Code</b>       | <b>Term ID</b> | <b>Description</b>                                            |
| M240N                     | All            | Anagen effluvium                                              |
| <b>Read CTV3 Code</b>     | <b>Term ID</b> | <b>Description</b>                                            |
| M240N                     | All            | Anagen effluvium                                              |
| <b>Tinea capitis</b>      |                |                                                               |
| <b>Read V2 Code</b>       | <b>Term ID</b> | <b>Description</b>                                            |
| AB00.                     | 00             | Dermatophytosis of scalp or beard                             |
| AB00.                     | 11             | Kerion                                                        |
| AB000                     | 00             | Dermatophytosis of scalp                                      |
| AB000                     | 11             | Tinea Capitis                                                 |
| AB00z                     | 00             | Dermatophytosis of scalp or beard NOS                         |
| <b>Read CTV3 Code</b>     | <b>Term ID</b> | <b>Description</b>                                            |
| AB000                     | All            | Tinea capitis                                                 |
| AB000                     | Y71oW          | Scalp ringworm                                                |
| AB000                     | Y71oX          | Dermatophytosis of scalp                                      |
| AB000                     | Y71oY          | Tinea capitis                                                 |
| AB000                     | Y71oZ          | Black dot ringworm                                            |
| AB000                     | Y71od          | Tinea tonsurans                                               |
| AB000                     | Ya6oA          | Tinea of the scalp                                            |
| X70QN                     | All            | Favus                                                         |
| X70QN                     | Y71ob          | Favus                                                         |
| X70QN                     | Y71oc          | Tinea favosa                                                  |
| X70QM                     | All            | Suppurative ringworm                                          |
| XE0SA                     | All            | Dermatophytosis of scalp or beard                             |
| AB00z                     | All            | Dermatophytosis of scalp or beard NOS                         |
| <b>Secondary syphilis</b> |                |                                                               |
| <b>Read V2 Code</b>       | <b>Term ID</b> | <b>Description</b>                                            |
| A913.                     | All            | Secondary syphilis of skin or mucus membranes                 |
| A9133                     | All            | Secondary syphilis of skin                                    |
| A913z                     | All            | Secondary syphilis of skin or mucus membranes NOS             |



|                         |                |                                                   |
|-------------------------|----------------|---------------------------------------------------|
| A9181                   | All            | Syphilitic alopecia                               |
| <b>Read CTV3 Code</b>   | <b>Term ID</b> | <b>Description</b>                                |
| A913.                   | All            | Secondary syphilis of skin and mucous membrane    |
| A9133                   | All            | Secondary syphilis of skin                        |
| A913z                   | All            | Secondary syphilis of skin or mucus membranes NOS |
| A9181                   | All            | Syphilitic alopecia                               |
| <b>Trichotillomania</b> |                |                                                   |
| <b>Read V2 Code</b>     | <b>Term ID</b> | <b>Description</b>                                |
| Eu633                   | All            | [X]Trichotillomania                               |
| <b>Read CTV3 Code</b>   | <b>Term ID</b> | <b>Description</b>                                |
| Eu633                   | All            | Trichotillomania                                  |

**Supplementary table S1.2.** Read codes to identify the extent of alopecia. The extent of disease will be considered to be that of the category recorded with the greatest extent

| <b>Alopecia Areata (Category: Localised)</b>   |                |                           |
|------------------------------------------------|----------------|---------------------------|
| <b>Read V2 Code</b>                            | <b>Term ID</b> | <b>Description</b>        |
| M2401                                          | All            | Alopecia areata           |
| M240U                                          | All            | Ophiasis                  |
| Myu62                                          | All            | [X]Other alopecia areata  |
| <b>Read CTV3 Code</b>                          | <b>Term ID</b> | <b>Description</b>        |
| XE1BH                                          | All            | Alopecia areata           |
| M240D                                          | All            | Ophiasic alopecia areata  |
| Myu62                                          | All            | [x]Other alopecia areata  |
| <b>Alopecia Areata (Category: Totalis)</b>     |                |                           |
| <b>Read V2 Code</b>                            | <b>Term ID</b> | <b>Description</b>        |
| M240B                                          | All            | Alopecia totalis          |
| <b>Read CTV3 Code</b>                          | <b>Term ID</b> | <b>Description</b>        |
| M240B                                          | All            | Total alopecia areata     |
| <b>Alopecia Areata (Category: Universalis)</b> |                |                           |
| <b>Read V2 Code</b>                            | <b>Term ID</b> | <b>Description</b>        |
| M240K                                          | All            | Alopecia universalis      |
| <b>Read CTV3 Code</b>                          | <b>Term ID</b> | <b>Description</b>        |
| X509h                                          | All            | Alopecia universalis      |
| X590h                                          | All            | Universal alopecia areata |

**Supplementary table S1.3.** Read codes to identify dermatology referrals.

| <b>Dermatology referrals</b> |                |                                                               |
|------------------------------|----------------|---------------------------------------------------------------|
| <b>Read V2 Code</b>          | <b>Term ID</b> | <b>Description</b>                                            |
| 8HJD.                        | All            | Dermatology self-referral                                     |
| 8H43.                        | All            | Dermatological referral                                       |
| 8H4S.                        | All            | Referral to dermatology special interest general practitioner |
| 8HHX.                        | All            | Referral to dermatology nurse specialist                      |
| 8HVI.                        | All            | Private referral to dermatologist                             |
| 8Hkq.                        | All            | Referral to community dermatology service                     |
| 8Hm0.                        | All            | Referral to dermatology clinical assessment service           |
| 8HM3.                        | All            | Listed for Dermatology admisn                                 |
| 8H3I.                        | All            | Non-urgent dermatology admisn.                                |
| 8HIJ4                        | All            | Internal practice dermatology referral                        |
| 8TOD.                        | All            | Referral to paediatric dermatology service                    |
| <b>Read CTV3 Code</b>        | <b>Term ID</b> | <b>Description</b>                                            |
| 8H43.                        | All            | Dermatological referral                                       |
| XaZJ0                        | All            | Referral to teledermatology service                           |
| XaXsX                        | All            | Referral to community dermatology service                     |
| 8HJD.                        | All            | Dermatology self-referral                                     |
| XaBTS                        | All            | Referral to dermatologist                                     |
| 8HVI.                        | All            | Private referral to dermatologist                             |
| Xaaln                        | All            | Internal practice dermatology referral                        |
| XaKCB                        | All            | Referral to dermatology nurse specialist                      |
| XaXsX                        | All            | Referral to community dermatology service                     |
| Xaacp                        | All            | Referral to paediatric dermatology service                    |
| XaAeq                        | All            | Referral for dermatology domiciliary visit                    |
| XaLqL                        | All            | Referral to dermatology special interest general practitioner |
| XaQKh                        | All            | Referral to dermatology clinical assessment service           |
| 8HK3.                        | All            | Dermatology D.V. requested                                    |
| XaAeq                        | All            | Referral for dermatology DV                                   |

**Supplementary table S1.4.** Medications which may be issued in primary care for the treatment of alopecia areata.

\* topical steroids will be grouped by potency; mild, moderate, potent, and very potent.

| <b>Medication group</b> | <b>Examples</b>                                                                                                  |
|-------------------------|------------------------------------------------------------------------------------------------------------------|
| Topical steroids*       | Hydrocortisone, Bethamethasone, Fluocinolone acetonide, Clobetasol proprionate, Clobetasone butyrate, Mometasone |
| Minoxidil               | Minoxidil                                                                                                        |
| Systemic steroids       | Prednisolone                                                                                                     |
| Dithranol               | Dithranol                                                                                                        |

## Codes used to identify mental health conditions and treatments

**Supplementary table S2.1.** Algorithms used to identify anxiety (non-phobia related anxiety disorder), depression episodes, recurrent major depression, agoraphobia, adjustment disorder self-harm and parasuicide.

Expressions in capitals equate to Boolean expressions. \*More than 1 year ago. SSRIs = selective serotonin reuptake inhibitors, TCA = tricyclic antidepressants, MAOI = monoamine oxidase inhibitors, CBT = cognitive behavioural therapy.

| Clinical entity               | ICD 10 code | Definition                                                                                                                                                                 |
|-------------------------------|-------------|----------------------------------------------------------------------------------------------------------------------------------------------------------------------------|
| Depressive episodes           | F32         | Any coded depressive episode (Supplementary table S2.2) AND concurrent treatment for depression                                                                            |
| Recurrent depressive disorder | F33         | (Any historical code* for a depressive episode [table S2.2] AND current treatment for depression) OR Any code for recurrent depressive disorder (Supplementary table S2.3) |
| Anxiety disorder              | F41         | Any coded anxiety episode (Supplementary table S2.4) AND concurrent treatment for anxiety                                                                                  |
| Adjustment disorder           | F43.2       | Any diagnosis code for adjustment disorder (Supplementary table S2.5)                                                                                                      |
| Agoraphobia                   | F40.0       | Any diagnosis code for agoraphobia (Supplementary table S2.6)                                                                                                              |
| Self-harm                     | NA          | Any diagnosis code or other strongly indicative code for self-harm (Supplementary table S2.7)                                                                              |
| Parasuicide                   | NA          | Any diagnosis code or other strongly indicative code for parasuicide including overdose (Supplementary tables S2.8 and S2.9)                                               |
| Depression treatments         | NA          | SSRIs, TCAs, MAOIs, counselling, CBT, and psychotherapy (Supplementary table S2.10)                                                                                        |
| Anxiety treatments            | NA          | SSRIs, anxiolytics, counselling, CBT, and psychotherapy (Supplementary table S2.10)                                                                                        |

**Supplementary table S2.2.** Read codes used to identify depression episodes.

| <b>Depression episodes</b> |                |                                                                           |
|----------------------------|----------------|---------------------------------------------------------------------------|
| <b>Read V2 Code</b>        | <b>Term ID</b> | <b>Description</b>                                                        |
| E0013                      | All            | Presenile dementia with depression                                        |
| E0021                      | All            | Senile dementia with depression                                           |
| E112.                      | All            | Single major depressive episode                                           |
| E1120                      | All            | Single major depressive episode, unspecified                              |
| E1121                      | All            | Single major depressive episode, mild                                     |
| E1122                      | All            | Single major depressive episode, moderate                                 |
| E1123                      | All            | Single major depressive episode, severe, without mention of psychosis     |
| E1124                      | All            | Single major depressive episode, severe, with psychosis                   |
| E1125                      | All            | Single major depressive episode, in partial or unspecified remission      |
| E1126                      | All            | Single major depressive episode, in full remission                        |
| E112z                      | All            | Single major depressive episode NOS                                       |
| E113.                      | All            | Recurrent major depressive episode                                        |
| E1130                      | All            | Recurrent major depressive episodes, unspecified                          |
| E1131                      | All            | Recurrent major depressive episodes, mild                                 |
| E1132                      | All            | Recurrent major depressive episodes, moderate                             |
| E1133                      | All            | Recurrent major depressive episodes, severe, without mention of psychosis |
| E1134                      | All            | Recurrent major depressive episodes, severe, with psychosis               |
| E1137                      | All            | Recurrent depressive disorder                                             |
| E113z                      | All            | Recurrent major depressive episode NOS                                    |
| E118.                      | All            | Seasonal affective disorder                                               |
| E11y2                      | All            | Atypical depressive disorder                                              |
| E11z2                      | All            | Masked depression                                                         |
| E130.                      | All            | Reactive depressive psychosis                                             |
| E135.                      | All            | Agitated depression                                                       |
| E2003                      | All            | Anxiety with depression                                                   |
| E291.                      | All            | Prolonged depressive reaction                                             |
| E2B..                      | All            | Depressive disorder NEC                                                   |
| E2B1.                      | All            | Chronic depression                                                        |
| E2B0.                      | All            | Postviral depression                                                      |
| Eu204                      | All            | [X]Post-schizophrenic depression                                          |
| Eu251                      | All            | [X]Schizoaffective disorder, depressive type                              |
| Eu32.                      | All            | [X]Depressive episode                                                     |
| Eu320                      | All            | [X]Mild depressive episode                                                |
| Eu321                      | All            | [X]Moderate depressive episode                                            |
| Eu322                      | All            | [X]Severe depressive episode without psychotic symptoms                   |
| Eu323                      | All            | [X]Severe depressive episode with psychotic symptoms                      |
| Eu324                      | All            | [X]Mild depression                                                        |
| Eu325                      | All            | [X]Major depression, mild                                                 |
| Eu326                      | All            | [X]Major depression, moderately severe                                    |





|       |     |                                                                                     |
|-------|-----|-------------------------------------------------------------------------------------|
| E1136 | All | Recurrent major depressive episodes, in full remission                              |
| E113z | All | Recurrent major depressive episode NOS                                              |
| X00SU | All | Masked depression                                                                   |
| E11y2 | All | Atypical depressive disorder                                                        |
| X00S8 | All | Post-schizophrenic depression                                                       |
| XSEGJ | All | Major depressive disorder                                                           |
| XSKr7 | All | Cotard syndrome                                                                     |
| XSGol | All | Moderate major depression                                                           |
| XSGok | All | Mild major depression                                                               |
| XSGom | All | Severe major depression without psychotic features                                  |
| XSGon | All | Severe major depression with psychotic features                                     |
| E1137 | All | Recurrent depressive disorder                                                       |
| E130. | All | Reactive depressive psychosis                                                       |
| E2B.. | All | Depressive disorder NEC                                                             |
| E2B0. | All | Postviral depression                                                                |
| E2B1. | All | Chronic depression                                                                  |
| Eu320 | All | [X]Mild depressive episode                                                          |
| Eu321 | All | [X]Moderate depressive episode                                                      |
| Eu331 | All | [X]Recurrent depressive disorder, current episode moderate                          |
| XE1Y1 | All | Recurrent major depressive episodes                                                 |
| XE1ZY | All | [X]Severe depressive episode without psychotic symptoms                             |
| XE1ZZ | All | [X]Severe depressive episode with psychotic symptoms                                |
| XE1Za | All | [X]Other depressive episodes                                                        |
| XE1Zb | All | [X]Depressive episode, unspecified                                                  |
| XE1Zd | All | [X]Recurrent depressive disorder, current episode severe without psychotic symptoms |
| XE1Ze | All | [X]Recurrent depressive disorder, current episode severe with psychotic symptoms    |
| XE1Zf | All | [X]Recurrent depressive disorder, unspecified                                       |
| XaB9J | All | Depression NOS                                                                      |
| XaCHr | All | [X] Single episode agitated depression without psychotic symptoms                   |
| XaCHs | All | [X] Single episode major depression without psychotic symptoms                      |
| XaCIs | All | Mild depression                                                                     |
| XaCIt | All | Moderate depression                                                                 |
| XaCIu | All | Severe depression                                                                   |
| E0013 | All | Presenile dementia with depression                                                  |
| E0021 | All | Senile dementia with depression                                                     |

**Supplementary table S2.3.** Read codes used to identify a diagnosis of recurrent major depression.

| <b>Recurrent major depression</b> |                |                                                                                        |
|-----------------------------------|----------------|----------------------------------------------------------------------------------------|
| <b>Read V2 Code</b>               | <b>Term ID</b> | <b>Description</b>                                                                     |
| E113.                             | All            | Recurrent major depressive episode                                                     |
| E1130                             | All            | Recurrent major depressive episodes, unspecified                                       |
| E1131                             | All            | Recurrent major depressive episodes, mild                                              |
| E1132                             | All            | Recurrent major depressive episodes, moderate                                          |
| E1133                             | All            | Recurrent major depressive episodes, severe, without mention of psychosis              |
| E1134                             | All            | Recurrent major depressive episodes, severe, with psychosis                            |
| E1135                             | All            | Recurrent major depressive episodes, in partial or unspecified remission               |
| E1136                             | All            | Recurrent major depressive episodes, in full remission                                 |
| E1137                             | All            | Recurrent depressive disorder                                                          |
| E113z                             | All            | Recurrent major depressive episode NOS                                                 |
| E2B1.                             | All            | Chronic depression                                                                     |
| Eu32A                             | All            | [X]Recurrent major depressive episodes, severe, with psychosis, psychosis in remission |
| Eu33.                             | All            | [X]Recurrent depressive disorder                                                       |
| Eu330                             | All            | [X]Recurrent depressive disorder, current episode mild                                 |
| Eu331                             | All            | [X]Recurrent depressive disorder, current episode moderate                             |
| Eu332                             | All            | [X]Recurrent depressive disorder, current episode severe without psychotic symptoms    |
| Eu333                             | All            | [X]Recurrent depressive disorder, current episode severe with psychotic symptoms       |
| Eu334                             | All            | [X]Recurrent depressive disorder, currently in remission                               |
| Eu33y                             | All            | [X]Other recurrent depressive disorders                                                |
| Eu33z                             | All            | [X]Recurrent depressive disorder, unspecified                                          |
| <b>Read CTV3 Code</b>             | <b>Term ID</b> | <b>Description</b>                                                                     |
| Xa0wV                             | All            | Recurrent brief depressive disorder                                                    |
| XM1GC                             | All            | Endogenous depression - recurrent                                                      |
| E1130                             | All            | Recurrent major depressive episodes, unspecified                                       |
| E1131                             | All            | Recurrent major depressive episodes, mild                                              |
| E1132                             | All            | Recurrent major depressive episodes, moderate                                          |
| E1133                             | All            | Recurrent major depressive episodes, severe, without mention of psychosis              |
| E1134                             | All            | Recurrent major depressive episodes, severe, with psychosis                            |
| XaX54                             | All            | Recurrent major depressive episodes, severe, with psychosis, psychosis in remission    |
| E1135                             | All            | Recurrent major depressive episodes, in partial or unspecified remission               |
| E1136                             | All            | Recurrent major depressive episodes, in full remission                                 |
| E113z                             | All            | Recurrent major depressive episode NOS                                                 |
| E1137                             | All            | Recurrent depressive disorder                                                          |

|       |     |                                                                                     |
|-------|-----|-------------------------------------------------------------------------------------|
| E2B1. | All | Chronic depression                                                                  |
| Eu331 | All | [X]Recurrent depressive disorder, current episode moderate                          |
| XE1Y1 | All | Recurrent major depressive episodes                                                 |
| XE1Zd | All | [X]Recurrent depressive disorder, current episode severe without psychotic symptoms |
| XE1Ze | All | [X]Recurrent depressive disorder, current episode severe with psychotic symptoms    |
| XE1Zf | All | [X]Recurrent depressive disorder, unspecified                                       |

For peer review only

**Supplementary table S2.4.** Read codes used to identify anxiety episodes.

| <b>Anxiety episode</b> |                |                                                 |
|------------------------|----------------|-------------------------------------------------|
| <b>Read V2 Code</b>    | <b>Term ID</b> | <b>Description</b>                              |
| E200.                  | All            | Anxiety states                                  |
| E2000                  | All            | Anxiety state unspecified                       |
| E2001                  | All            | Panic disorder                                  |
| E2002                  | All            | Generalised anxiety disorder                    |
| E2003                  | All            | Anxiety with depression                         |
| E2004                  | All            | Chronic anxiety                                 |
| E2005                  | All            | Recurrent anxiety                               |
| E200z                  | All            | Anxiety state NOS                               |
| Eu41.                  | All            | [X]Other anxiety disorders                      |
| Eu410                  | All            | [X]Panic disorder [episodic paroxysmal anxiety] |
| Eu411                  | All            | [X]Generalized anxiety disorder                 |
| Eu412                  | All            | [X]Mixed anxiety and depressive disorder        |
| Eu413                  | All            | [X]Other mixed anxiety disorders                |
| Eu41y                  | All            | [X]Other specified anxiety disorders            |
| Eu41z                  | All            | [X]Anxiety disorder, unspecified                |
| <b>Read CTV3 Code</b>  | <b>Term ID</b> | <b>Description</b>                              |
| E200.                  | All            | Anxiety disorder                                |
| XE1Y7                  | All            | Panic disorder                                  |
| Eu410                  | All            | [X]Panic disorder [episodic paroxysmal anxiety] |
| E2002                  | All            | Generalised anxiety disorder                    |
| X00Sb                  | All            | Mixed anxiety and depressive disorder           |
| X00RP                  | All            | Organic anxiety disorder                        |
| E2004                  | All            | Chronic anxiety                                 |
| E2005                  | All            | Recurrent anxiety                               |
| E200z                  | All            | Anxiety state NOS                               |
| X00Sc                  | All            | Anxiety hysteria                                |
| Eu41.                  | All            | [X]Other anxiety disorders                      |
| Eu413                  | All            | [X]Other mixed anxiety disorders                |
| Eu41z                  | All            | [X]Anxiety disorder, unspecified                |
| XE1Zj                  | All            | [X]Other specified anxiety disorders            |

Supplementary table S2.5. Read codes used to identify adjustment disorder.

| <b>Adjustment disorder</b> |                |                                                                    |
|----------------------------|----------------|--------------------------------------------------------------------|
| <b>Read V2 Code</b>        | <b>Term ID</b> | <b>Description</b>                                                 |
| E29..                      | All            | Adjustment reaction                                                |
| E290.                      | All            | Brief depressive reaction                                          |
| E2900                      | All            | Grief reaction                                                     |
| E290z                      | All            | Brief depressive reaction NOS                                      |
| E291.                      | All            | Prolonged depressive reaction                                      |
| E292.                      | All            | Adjustment reaction with predominant disturbance of other emotions |
| E2924                      | All            | Adjustment reaction with anxious mood                              |
| E292y                      | All            | Adjustment reaction with mixed disturbance of emotion              |
| E292z                      | All            | Adjustment reaction with disturbance of other emotion NOS          |
| E293.                      | All            | Adjustment reaction with predominant disturbance of conduct        |
| E2930                      | All            | Adjustment reaction with aggression                                |
| E2931                      | All            | Adjustment reaction with antisocial behaviour                      |
| E2932                      | All            | Adjustment reaction with destructiveness                           |
| E293z                      | All            | Adjustment reaction with predominant disturbance of conduct NOS    |
| E294.                      | All            | Adjustment reaction with mixed disturbance of emotion and conduct  |
| E29y.                      | All            | Other adjustment reactions                                         |
| E29y2                      | All            | Adjustment reaction with physical symptoms                         |
| E29y3                      | All            | Elective mutism due to an adjustment reaction                      |
| E29y5                      | All            | Other adjustment reaction with withdrawal                          |
| E29yz                      | All            | Other adjustment reactions NOS                                     |
| E29z.                      | All            | Adjustment reaction NOS                                            |
| <b>Read CTV3 Code</b>      | <b>Term ID</b> | <b>Description</b>                                                 |
| E29..                      | All            | Adjustment disorder                                                |
| E290.                      | All            | Brief depressive adjustment reaction                               |
| E290z                      | All            | Brief depressive reaction NOS                                      |
| E291.                      | All            | Prolonged depressive adjustment reaction                           |
| E2924                      | All            | Adjustment reaction with anxious mood                              |
| E292y                      | All            | Adjustment reaction with mixed disturbance of emotion              |
| E293.                      | All            | Adjustment reaction with predominant disturbance of conduct        |
| E2930                      | All            | Adjustment reaction with aggression                                |
| E2931                      | All            | Adjustment reaction with antisocial behaviour                      |
| E2932                      | All            | Adjustment reaction with destructiveness                           |
| E293z                      | All            | Adjustment reaction with predominant disturbance of conduct NOS    |
| E294.                      | All            | Adjustment reaction with mixed disturbance of emotion and conduct  |
| E292.                      | All            | Adjustment reaction with predominant disturbance of other emotions |
| E292z                      | All            | Adjustment reaction with disturbance of other emotion NOS          |
| E29y.                      | All            | Other adjustment reactions                                         |

|       |     |                                               |
|-------|-----|-----------------------------------------------|
| E29yz | All | Other adjustment reactions NOS                |
| E29y2 | All | Adjustment reaction with physical symptoms    |
| E29y3 | All | Elective mutism due to an adjustment reaction |
| E29y5 | All | Other adjustment reaction with withdrawal     |
| E29z. | All | Adjustment reaction NOS                       |

For peer review only

**Supplementary table S2.6.** Read codes used to identify agoraphobia.

| <b>Agoraphobia</b>    |                |                                                           |
|-----------------------|----------------|-----------------------------------------------------------|
| <b>Read V2 Code</b>   | <b>Term ID</b> | <b>Description</b>                                        |
| Eu400                 | All            | [X]Agoraphobia                                            |
| E2021                 | All            | Agoraphobia with panic attacks                            |
| Eu400                 | All            | [X]Panic disorder with agoraphobia                        |
| E2022                 | All            | Agoraphobia without mention of panic attacks              |
| Eu400                 | All            | [X]Agoraphobia without history of panic disorder          |
| E2029                 | All            | Fear of crowds                                            |
| <b>Read CTV3 Code</b> | <b>Term ID</b> | <b>Description</b>                                        |
| X00SV                 | All            | Agoraphobia                                               |
| E2021                 | All            | Agoraphobia with panic attacks                            |
| E2022                 | All            | Agoraphobia without mention of panic attacks              |
| XaK2c                 | All            | H/O: agoraphobia                                          |
| XaY00                 | All            | Mobility inventory for agoraphobia                        |
| XaYS1                 | All            | Mobility inventory for agoraphobia when alone score       |
| XaYS0                 | All            | Mobility inventory for agoraphobia when accompanied score |
| X00SV                 | All            | Phobia of going out                                       |



**Supplementary table S2.7.** Read codes used to identify self-harm.

| <b>Self-harm</b>    |                |                                                                                                                           |
|---------------------|----------------|---------------------------------------------------------------------------------------------------------------------------|
| <b>Read V2 Code</b> | <b>Term ID</b> | <b>Description</b>                                                                                                        |
| U2...               | All            | [X]Intentional self-harm                                                                                                  |
| U2E..               | All            | [X]Self mutilation                                                                                                        |
| U2y..               | All            | [X]Intentional self harm by other specified means                                                                         |
| U2y1.               | All            | [X]Intentional self harm by other specified means, occurrence in residential institution                                  |
| U2y2.               | All            | [X]Intentional self harm by other specified means, occurrence at school, other institution and public administrative area |
| U2y3.               | All            | [X]Intentional self harm by other specified means, occurrence at sports and athletics area                                |
| U2y4.               | All            | [X]Intentional self harm by other specified means, occurrence on street and highway                                       |
| U2y5.               | All            | [X]Intentional self harm by other specified means, occurrence at trade and service area                                   |
| U2y6.               | All            | [X]Intentional self harm by other specified means, occurrence at industrial and construction area                         |
| U2y7.               | All            | [X]Intentional self harm by other specified means, occurrence on farm                                                     |
| U2yy.               | All            | [X]Intentional self harm by other specified means, occurrence at other specified place                                    |
| U2yz.               | All            | [X]Intentional self harm by other specified means, occurrence at unspecified place                                        |
| U2z..               | All            | [X]Intentional self harm by unspecified means                                                                             |
| U2z..               | All            | [X]Intentional self harm by unspecified means                                                                             |
| U2z0.               | All            | [X]Intentional self harm by unspecified means, occurrence at home                                                         |
| U2z1.               | All            | [X]Intentional self harm by unspecified means, occurrence in residential institution                                      |
| U2z2.               | All            | [X]Intentional self harm by unspecified means, occurrence at school, other institution and public administrative area     |
| U2z3.               | All            | [X]Intentional self harm by unspecified means, occurrence at sports and athletics area                                    |
| U2z4.               | All            | [X]Intentional self harm by unspecified means, occurrence on street and highway                                           |
| U2z5.               | All            | [X]Intentional self harm by unspecified means, occurrence at trade and service area                                       |
| U2z6.               | All            | [X]Intentional self harm by unspecified means, occurrence at industrial and construction area                             |
| U2z7.               | All            | [X]Intentional self harm by unspecified means, occurrence on farm                                                         |
| U2zy.               | All            | [X]Intentional self harm by unspecified means, occurrence at other specified place                                        |
| U2zz.               | All            | [X]Intentional self harm by unspecified means, occurrence at unspecified place                                            |
| 146B.               | All            | H/O: deliberate self harm                                                                                                 |
| ZV1B2               | All            | [V]Personal history of self-harm                                                                                          |
| U720.               | All            | [X]Sequelae of intentional self-harm                                                                                      |
| TK601               | All            | Self inflicted lacerations to wrist                                                                                       |
| U26..               | All            | [X]Intentional self harm by explosive material                                                                            |

|       |     |                                                                                                                                        |
|-------|-----|----------------------------------------------------------------------------------------------------------------------------------------|
| U260. | All | [X]Intentional self harm by explosive material, occurrence at home                                                                     |
| U261. | All | [X]Intentional self harm by explosive material, occurrence in residential institution                                                  |
| U262. | All | [X]Intentional self harm by explosive material, occurrence at school, other institution and public administrative area                 |
| U263. | All | [X]Intentional self harm by explosive material, occurrence at sports and athletics area                                                |
| U264. | All | [X]Intentional self harm by explosive material, occurrence on street and highway                                                       |
| U265. | All | [X]Intentional self harm by explosive material, occurrence at trade and service area                                                   |
| U266. | All | [X]Intentional self harm by explosive material, occurrence at industrial and construction area                                         |
| U267. | All | [X]Intentional self harm by explosive material, occurrence on farm                                                                     |
| U26y. | All | [X]Intentional self harm by explosive material, occurrence at other specified place                                                    |
| U26z. | All | [X]Intentional self harm by explosive material, occurrence at unspecified place                                                        |
| U27.. | All | [X]Intentional self harm by smoke, fire and flames                                                                                     |
| U270. | All | [X]Intentional self harm by smoke, fire and flames, occurrence at home                                                                 |
| U271. | All | [X]Intentional self harm by smoke, fire and flames, occurrence in residential institution                                              |
| U272. | All | [X]Intentional self harm by smoke, fire and flames, occurrence at school, other institution and public administrative area             |
| U273. | All | [X]Intentional self harm by smoke, fire and flames, occurrence at sports and athletics area                                            |
| U274. | All | [X]Intentional self harm by smoke, fire and flames, occurrence on street and highway                                                   |
| U275. | All | [X]Intentional self harm by smoke, fire and flames, occurrence at trade and service area                                               |
| U276. | All | [X]Intentional self harm by smoke, fire and flames, occurrence at industrial and construction area                                     |
| U277. | All | [X]Intentional self harm by smoke, fire and flames, occurrence on farm                                                                 |
| U27y. | All | [X]Intentional self harm by smoke, fire and flames, occurrence at other specified place                                                |
| U27z. | All | [X]Intentional self harm by smoke, fire and flames, occurrence at unspecified place                                                    |
| U28.. | All | [X]Intentional self harm by steam, hot vapours and hot objects                                                                         |
| U280. | All | [X]Intentional self harm by steam, hot vapours and hot objects, occurrence at home                                                     |
| U281. | All | [X]Intentional self harm by steam, hot vapours and hot objects, occurrence in residential institution                                  |
| U282. | All | [X]Intentional self harm by steam, hot vapours and hot objects, occurrence at school, other institution and public administrative area |
| U283. | All | [X]Intentional self harm by steam, hot vapours and hot objects, occurrence at sports and athletics area                                |
| U284. | All | [X]Intentional self harm by steam, hot vapours and hot objects, occurrence on street and highway                                       |

|                       |                |                                                                                                                  |
|-----------------------|----------------|------------------------------------------------------------------------------------------------------------------|
| U285.                 | All            | [X]Intentional self harm by steam, hot vapours and hot objects, occurrence at trade and service area             |
| U286.                 | All            | [X]Intentional self harm by steam, hot vapours and hot objects, occurrence at industrial and construction area   |
| U287.                 | All            | [X]Intentional self harm by steam, hot vapours and hot objects, occurrence on farm                               |
| U28y.                 | All            | [X]Intentional self harm by steam, hot vapours and hot objects, occurrence at other specified place              |
| U28z.                 | All            | [X]Intentional self harm by steam, hot vapours and hot objects, occurrence at unspecified place                  |
| U29..                 | All            | [X]Intentional self harm by sharp object                                                                         |
| U290.                 | All            | [X]Intentional self harm by sharp object, occurrence at home                                                     |
| U291.                 | All            | [X]Intentional self harm by sharp object, occurrence in residential institution                                  |
| U292.                 | All            | [X]Intentional self harm by sharp object, occurrence at school, other institution and public administrative area |
| U293.                 | All            | [X]Intentional self harm by sharp object, occurrence at sports and athletics area                                |
| U294.                 | All            | [X]Intentional self harm by sharp object, occurrence on street and highway                                       |
| U295.                 | All            | [X]Intentional self harm by sharp object, occurrence at trade and service area                                   |
| U296.                 | All            | [X]Intentional self harm by sharp object, occurrence at industrial and construction area                         |
| U297.                 | All            | [X]Intentional self harm by sharp object, occurrence on farm                                                     |
| U2A..                 | All            | [X]Intentional self harm by blunt object                                                                         |
| U2A0.                 | All            | [X]Intentional self harm by blunt object, occurrence at home                                                     |
| U2A1.                 | All            | [X]Intentional self harm by blunt object, occurrence in residential institution                                  |
| U2A2.                 | All            | [X]Intentional self harm by blunt object, occurrence at school, other institution and public administrative area |
| U2A3.                 | All            | [X]Intentional self harm by blunt object, occurrence at sports and athletics area                                |
| U2A4.                 | All            | [X]Intentional self harm by blunt object, occurrence on street and highway                                       |
| U2A5.                 | All            | [X]Intentional self harm by blunt object, occurrence at trade and service area                                   |
| U2A6.                 | All            | [X]Intentional self harm by blunt object, occurrence at industrial and construction area                         |
| U2A7.                 | All            | [X]Intentional self harm by blunt object, occurrence on farm                                                     |
| U2Ay.                 | All            | [X]Intentional self harm by blunt object, occurrence at other specified place                                    |
| U2Az.                 | All            | [X]Intentional self harm by blunt object, occurrence at unspecified place                                        |
| <b>Read CTV3 Code</b> | <b>Term ID</b> | <b>Description</b>                                                                                               |
| XE22H                 | All            | Suicide and self harm                                                                                            |
| X71BH                 | All            | Self injury by cigarette burn                                                                                    |
| XE22K                 | All            | Self injury with external chemical burn                                                                          |
| Xa0EN                 | All            | Self inflicted injury                                                                                            |
| ZV1B2                 | All            | [V]Personal history of self-harm                                                                                 |

|       |     |                                                                                                                  |
|-------|-----|------------------------------------------------------------------------------------------------------------------|
| XaF9U | All | H/O: deliberate self harm                                                                                        |
| U2A.. | All | [X]Intentional self harm by blunt object                                                                         |
| U2A0. | All | [X]Intentional self harm by blunt object, occurrence at home                                                     |
| U2A1. | All | [X]Intentional self harm by blunt object, occurrence in residential institution                                  |
| U2A2. | All | [X]Intentional self harm by blunt object, occurrence at school, other institution and public administrative area |
| U2A3. | All | [X]Intentional self harm by blunt object, occurrence at sports and athletics area                                |
| U2A4. | All | [X]Intentional self harm by blunt object, occurrence on street and highway                                       |
| U2A5. | All | [X]Intentional self harm by blunt object, occurrence at trade and service area                                   |
| U2A6. | All | [X]Intentional self harm by blunt object, occurrence at industrial and construction area                         |
| U2A7. | All | [X]Intentional self harm by blunt object, occurrence on farm                                                     |
| U2Ay. | All | [X]Intentional self harm by blunt object, occurrence at other specified place                                    |
| U2Az. | All | [X]Intentional self harm by blunt object, occurrence at unspecified place                                        |
| U29.. | All | [X]Intentional self harm by sharp object                                                                         |
| U290. | All | [X]Intentional self harm by sharp object, occurrence at home                                                     |
| U291. | All | [X]Intentional self harm by sharp object, occurrence in residential institution                                  |
| U292. | All | [X]Intentional self harm by sharp object, occurrence at school, other institution and public administrative area |
| U293. | All | [X]Intentional self harm by sharp object, occurrence at sports and athletics area                                |
| U294. | All | [X]Intentional self harm by sharp object, occurrence on street and highway                                       |
| U295. | All | [X]Intentional self harm by sharp object, occurrence at trade and service area                                   |
| U296. | All | [X]Intentional self harm by sharp object, occurrence at industrial and construction area                         |
| U297. | All | [X]Intentional self harm by sharp object, occurrence on farm                                                     |
| U29y. | All | [X]Intentional self harm by sharp object, occurrence at other specified place                                    |
| U29z. | All | [X]Intentional self harm by sharp object, occurrence at unspecified place                                        |
| XE22i | All | [X]Intentional self harm by self mutilation                                                                      |
| X766K | All | Deliberate self-harm                                                                                             |
| X766U | All | Biting self                                                                                                      |
| X766R | All | Biting own hand                                                                                                  |
| Xa2zx | All | Biting own fingers                                                                                               |
| Xa2zy | All | Biting own toes                                                                                                  |
| Xa2o5 | All | Biting own arm                                                                                                   |
| Xa2p5 | All | Burning self                                                                                                     |
| X766V | All | Cutting self                                                                                                     |
| XaBA0 | All | Cutting own wrists                                                                                               |

|    |       |     |                                                                    |
|----|-------|-----|--------------------------------------------------------------------|
| 1  |       |     |                                                                    |
| 2  |       |     |                                                                    |
| 3  |       |     |                                                                    |
| 4  | Ua1A4 | All | Cutting own throat                                                 |
| 5  | Xa2pE | All | Damaging own wounds                                                |
| 6  | Xa2pF | All | Reopening scars                                                    |
| 7  | Xa2pH | All | Poking fingers into wound                                          |
| 8  |       |     |                                                                    |
| 9  | XaAxe | All | Inserting objects into wound                                       |
| 10 | Xa2ny | All | Gouging own body parts                                             |
| 11 | Xa2nz | All | Gouging own flesh                                                  |
| 12 |       |     |                                                                    |
| 13 | Xa2o0 | All | Gouging own eyes                                                   |
| 14 | Xa2o1 | All | Gouging own rectum                                                 |
| 15 | Xa30D | All | Gouging own vagina                                                 |
| 16 | E2731 | All | Head-banging                                                       |
| 17 |       |     |                                                                    |
| 18 | Xa2o2 | All | Banging own head against object                                    |
| 19 | Xa2o3 | All | Banging own head against own body parts                            |
| 20 | Xa2pI | All | Hitting self                                                       |
| 21 | Xa2pJ | All | Punching self                                                      |
| 22 | Xa2pK | All | Slapping self                                                      |
| 23 |       |     |                                                                    |
| 24 | X766S | All | Head-hitting                                                       |
| 25 | Xa2p3 | All | Inserting foreign bodies into own orifices                         |
| 26 | Ua14Q | All | Self-electrocution                                                 |
| 27 | Xa2pQ | All | Nipping self                                                       |
| 28 | Xa2pM | All | Picking own skin                                                   |
| 29 | Xa2pR | All | Pinching self                                                      |
| 30 | Xa2pN | All | Rubbing own skin                                                   |
| 31 |       |     |                                                                    |
| 32 | X766T | All | Scratches self                                                     |
| 33 | Xa303 | All | Self-scalding                                                      |
| 34 | Ua14N | All | Self-incineration                                                  |
| 35 | X766L | All | Self-mutilation                                                    |
| 36 | X766M | All | Self-mutilation of hands                                           |
| 37 |       |     |                                                                    |
| 38 | Xa2nl | All | Self-mutilation of genitalia                                       |
| 39 | X766N | All | Self-mutilation of penis                                           |
| 40 | X766O | All | Self-mutilation of eyes                                            |
| 41 | Xa2nm | All | Enucleation of own eyes                                            |
| 42 | X766P | All | Self-mutilation of ears                                            |
| 43 | Xa2no | All | Self-inducing a prolapse                                           |
| 44 | Xa2nq | All | Breaking own bones                                                 |
| 45 | Xa2nr | All | Pulling own teeth out                                              |
| 46 | Xa2nt | All | Eating own flesh                                                   |
| 47 | Xa2nv | All | Stripping own skin                                                 |
| 48 | U2E.. | All | [X]Self mutilation                                                 |
| 49 | X766W | All | Swallowing objects                                                 |
| 50 | Xa2p2 | All | Swallowing substances                                              |
| 51 | X766Q | All | Self-inflicted skin problems                                       |
| 52 | XE22c | All | [X]Intentional self-harm                                           |
| 53 | U26.. | All | [X]Intentional self harm by explosive material                     |
| 54 | U260. | All | [X]Intentional self harm by explosive material, occurrence at home |
| 55 |       |     |                                                                    |
| 56 |       |     |                                                                    |
| 57 |       |     |                                                                    |
| 58 |       |     |                                                                    |
| 59 |       |     |                                                                    |
| 60 |       |     |                                                                    |

|       |     |                                                                                                                                        |
|-------|-----|----------------------------------------------------------------------------------------------------------------------------------------|
| U261. | All | [X]Intentional self harm by explosive material, occurrence in residential institution                                                  |
| U262. | All | [X]Intentional self harm by explosive material, occurrence at school, other institution and public administrative area                 |
| U263. | All | [X]Intentional self harm by explosive material, occurrence at sports and athletics area                                                |
| U264. | All | [X]Intentional self harm by explosive material, occurrence on street and highway                                                       |
| U265. | All | [X]Intentional self harm by explosive material, occurrence at trade and service area                                                   |
| U266. | All | [X]Intentional self harm by explosive material, occurrence at industrial and construction area                                         |
| U267. | All | [X]Intentional self harm by explosive material, occurrence on farm                                                                     |
| U26y. | All | [X]Intentional self harm by explosive material, occurrence at other specified place                                                    |
| U26z. | All | [X]Intentional self harm by explosive material, occurrence at unspecified place                                                        |
| U27.. | All | [X]Intentional self harm by smoke, fire and flames                                                                                     |
| U270. | All | [X]Intentional self harm by smoke, fire and flames, occurrence at home                                                                 |
| U271. | All | [X]Intentional self harm by smoke, fire and flames, occurrence in residential institution                                              |
| U272. | All | [X]Intentional self harm by smoke, fire and flames, occurrence at school, other institution and public administrative area             |
| U273. | All | [X]Intentional self harm by smoke, fire and flames, occurrence at sports and athletics area                                            |
| U274. | All | [X]Intentional self harm by smoke, fire and flames, occurrence on street and highway                                                   |
| U275. | All | [X]Intentional self harm by smoke, fire and flames, occurrence at trade and service area                                               |
| U276. | All | [X]Intentional self harm by smoke, fire and flames, occurrence at industrial and construction area                                     |
| U277. | All | [X]Intentional self harm by smoke, fire and flames, occurrence on farm                                                                 |
| U27y. | All | [X]Intentional self harm by smoke, fire and flames, occurrence at other specified place                                                |
| U27z. | All | [X]Intentional self harm by smoke, fire and flames, occurrence at unspecified place                                                    |
| U28.. | All | [X]Intentional self harm by steam, hot vapours and hot objects                                                                         |
| U280. | All | [X]Intentional self harm by steam, hot vapours and hot objects, occurrence at home                                                     |
| U281. | All | [X]Intentional self harm by steam, hot vapours and hot objects, occurrence in residential institution                                  |
| U282. | All | [X]Intentional self harm by steam, hot vapours and hot objects, occurrence at school, other institution and public administrative area |
| U283. | All | [X]Intentional self harm by steam, hot vapours and hot objects, occurrence at sports and athletics area                                |
| U284. | All | [X]Intentional self harm by steam, hot vapours and hot objects, occurrence on street and highway                                       |
| U285. | All | [X]Intentional self harm by steam, hot vapours and hot objects, occurrence at trade and service area                                   |



|       |     |                                                                                                                  |
|-------|-----|------------------------------------------------------------------------------------------------------------------|
| U286. | All | [X]Intentional self harm by steam, hot vapours and hot objects, occurrence at industrial and construction area   |
| U287. | All | [X]Intentional self harm by steam, hot vapours and hot objects, occurrence on farm                               |
| U28y. | All | [X]Intentional self harm by steam, hot vapours and hot objects, occurrence at other specified place              |
| U28z. | All | [X]Intentional self harm by steam, hot vapours and hot objects, occurrence at unspecified place                  |
| U29.. | All | [X]Intentional self harm by sharp object                                                                         |
| U290. | All | [X]Intentional self harm by sharp object, occurrence at home                                                     |
| U291. | All | [X]Intentional self harm by sharp object, occurrence in residential institution                                  |
| U292. | All | [X]Intentional self harm by sharp object, occurrence at school, other institution and public administrative area |
| U293. | All | [X]Intentional self harm by sharp object, occurrence at sports and athletics area                                |
| U294. | All | [X]Intentional self harm by sharp object, occurrence on street and highway                                       |
| U295. | All | [X]Intentional self harm by sharp object, occurrence at trade and service area                                   |
| U296. | All | [X]Intentional self harm by sharp object, occurrence at industrial and construction area                         |
| U297. | All | [X]Intentional self harm by sharp object, occurrence on farm                                                     |
| U2A.. | All | [X]Intentional self harm by blunt object                                                                         |
| U2A0. | All | [X]Intentional self harm by blunt object, occurrence at home                                                     |
| U2A1. | All | [X]Intentional self harm by blunt object, occurrence in residential institution                                  |
| U2A2. | All | [X]Intentional self harm by blunt object, occurrence at school, other institution and public administrative area |
| U2A3. | All | [X]Intentional self harm by blunt object, occurrence at sports and athletics area                                |
| U2A4. | All | [X]Intentional self harm by blunt object, occurrence on street and highway                                       |
| U2A5. | All | [X]Intentional self harm by blunt object, occurrence at trade and service area                                   |
| U2A6. | All | [X]Intentional self harm by blunt object, occurrence at industrial and construction area                         |
| U2A7. | All | [X]Intentional self harm by blunt object, occurrence on farm                                                     |
| U2Ay. | All | [X]Intentional self harm by blunt object, occurrence at other specified place                                    |
| U2Az. | All | [X]Intentional self harm by blunt object, occurrence at unspecified place                                        |

**Supplementary table S2.8.** Read codes used to identify parasuicide.

| <b>Parasuicide</b>  |                |                                                                                  |
|---------------------|----------------|----------------------------------------------------------------------------------|
| <b>Read V2 Code</b> | <b>Term ID</b> | <b>Description</b>                                                               |
| U21..               | All            | [X]Intent self harm by hanging, strangulation/suffocation                        |
| U210.               | All            | [X]Int self harm by hanging, strangulation/suffocation occ home                  |
| U211.               | All            | [X]Intent self harm by hanging, strangulation/suffocation at res institut        |
| U212.               | All            | [X]Int self harm by hanging, strangulation/suffocation in school/pub admin area  |
| U213.               | All            | [X]Intent self harm by hanging, strangulation/suffocation in sport/athletic area |
| U214.               | All            | [X]Int self harm by hanging, strangulation/suffocation in street/highway         |
| U215.               | All            | [X]Intent self harm by hanging, strangulation/suffocation trade/service area     |
| U216.               | All            | [X]Int self harm by hanging, strangulation/suffocation indust/construct area     |
| U217.               | All            | [X]Int self harm by hanging, strangulation/suffocation occ farm                  |
| U21y.               | All            | [X]Int self harm by hanging, strangulation/suffocation other spec place          |
| U21z.               | All            | [X]Intent self harm by hanging, strangulation/suffocation unspecif place         |
| U22..               | All            | [X]Intent self harm by drowning and submersion                                   |
| U220.               | All            | [X]Int self harm by drowning and submersion occ home                             |
| U221.               | All            | [X]Intent self harm by drowning and submersion at res institut                   |
| U222.               | All            | [X]Int self harm by drowning and submersion in school/pub admin area             |
| U223.               | All            | [X]Intent self harm by drowning and submersion in sport/athletic area            |
| U224.               | All            | [X]Int self harm by drowning and submersion in street/highway                    |
| U225.               | All            | [X]Intent self harm by drowning and submersion trade/service area                |
| U226.               | All            | [X]Int self harm by drowning and submersion indust/construct area                |
| U227.               | All            | [X]Int self harm by drowning and submersion occ farm                             |
| U22y.               | All            | [X]Int self harm by drowning and submersion other spec place                     |
| U22z.               | All            | [X]Intent self harm by drowning and submersion unspecif place                    |
| U23..               | All            | [X]Intent self harm by handgun discharge                                         |
| U230.               | All            | [X]Int self harm by handgun discharge occ home                                   |
| U231.               | All            | [X]Intent self harm by handgun discharge at res institut                         |
| U232.               | All            | [X]Int self harm by handgun discharge in school/pub admin area                   |
| U233.               | All            | [X]Intent self harm by handgun discharge in sport/athletic area                  |
| U234.               | All            | [X]Int self harm by handgun discharge in street/highway                          |
| U235.               | All            | [X]Intent self harm by handgun discharge trade/service area                      |
| U236.               | All            | [X]Int self harm by handgun discharge indust/construct area                      |
| U237.               | All            | [X]Int self harm by handgun discharge occ farm                                   |
| U23y.               | All            | [X]Int self harm by handgun discharge other spec place                           |
| U23z.               | All            | [X]Intent self harm by handgun discharge unspecif place                          |



|       |     |                                                                                                                                                 |
|-------|-----|-------------------------------------------------------------------------------------------------------------------------------------------------|
| U24.. | All | [X]Intentional self harm by rifle, shotgun and larger firearm discharge                                                                         |
| U240. | All | [X]Intentional self harm by rifle, shotgun and larger firearm discharge, occurrence at home                                                     |
| U241. | All | [X]Intentional self harm by rifle, shotgun and larger firearm discharge, occurrence in residential institution                                  |
| U242. | All | [X]Intentional self harm by rifle, shotgun and larger firearm discharge, occurrence at school, other institution and public administrative area |
| U243. | All | [X]Intentional self harm by rifle, shotgun and larger firearm discharge, occurrence at sports and athletics area                                |
| U244. | All | [X]Intentional self harm by rifle, shotgun and larger firearm discharge, occurrence on street and highway                                       |
| U245. | All | [X]Intentional self harm by rifle, shotgun and larger firearm discharge, occurrence at trade and service area                                   |
| U246. | All | [X]Intentional self harm by rifle, shotgun and larger firearm discharge, occurrence at industrial and construction area                         |
| U247. | All | [X]Intentional self harm by rifle, shotgun and larger firearm discharge, occurrence on farm                                                     |
| U24y. | All | [X]Intentional self harm by rifle, shotgun and larger firearm discharge, occurrence at other specified place                                    |
| U24z. | All | [X]Intentional self harm by rifle, shotgun and larger firearm discharge, occurrence at unspecified place                                        |
| U25.. | All | [X]Intentional self harm by other and unspecified firearm discharge                                                                             |
| U250. | All | [X]Intentional self harm by other and unspecified firearm discharge, occurrence at home                                                         |
| U251. | All | [X]Intentional self harm by other and unspecified firearm discharge, occurrence in residential institution                                      |
| U252. | All | [X]Intentional self harm by other and unspecified firearm discharge, occurrence at school, other institution and public administrative area     |
| U253. | All | [X]Intentional self harm by other and unspecified firearm discharge, occurrence at sports and athletics area                                    |
| U254. | All | [X]Intentional self harm by other and unspecified firearm discharge, occurrence on street and highway                                           |
| U255. | All | [X]Intentional self harm by other and unspecified firearm discharge, occurrence at trade and service area                                       |
| U256. | All | [X]Intentional self harm by other and unspecified firearm discharge, occurrence at industrial and construction area                             |
| U257. | All | [X]Intentional self harm by other and unspecified firearm discharge, occurrence on farm                                                         |
| U25y. | All | [X]Intentional self harm by other and unspecified firearm discharge, occurrence at other specified place                                        |
| U25z. | All | [X]Intentional self harm by other and unspecified firearm discharge, occurrence at unspecified place                                            |
| 2...  | All | [X]Suicide                                                                                                                                      |
| TK... | All | Attempted suicide                                                                                                                               |
| TK0.. | All | Suicide and selfinflicted poisoning by solid and liquid substances                                                                              |
| TK00. | All | Suicide and selfinflicted poisoning by analgesics, antipyretics and anti-rheumatics                                                             |
| TK01. | All | Suicide + selfinflicted poisoning by barbiturates                                                                                               |
| TK010 | All | Suicide and self inflicted injury by Amylobarbitone                                                                                             |

|       |     |                                                                                                                                                       |
|-------|-----|-------------------------------------------------------------------------------------------------------------------------------------------------------|
| TK011 | All | Suicide and self inflicted injury by Barbitone                                                                                                        |
| TK012 | All | Suicide and self inflicted injury by Butabarbitalone                                                                                                  |
| TK013 | All | Suicide and self inflicted injury by Pentabarbitalone                                                                                                 |
| TK014 | All | Suicide and self inflicted injury by Phenobarbitalone                                                                                                 |
| TK015 | All | Suicide and self inflicted injury by Quinalbarbitalone                                                                                                |
| TK01z | All | Suicide and self inflicted injury by barbiturates                                                                                                     |
| TK02. | All | Suicide and selfinflicted poisoning by other sedatives and hypnotics                                                                                  |
| TK03. | All | Suicide and selfinflicted poisoning by tranquillisers and other psychotropic agents                                                                   |
| TK04. | All | Suicide and selfinflicted poisoning by other drugs and medicines                                                                                      |
| TK05. | All | Suicide + selfinflicted poisoning by drug or medicine NOS                                                                                             |
| TK06. | All | Suicide and selfinflicted poisoning by agricultural and horticultural chemical and pharmaceutical preparations other than plant foods and fertilizers |
| TK07. | All | Suicide and selfinflicted poisoning by corrosive and caustic substances                                                                               |
| TK08. | All | Suicide and selfinflicted poisoning by arsenic and its compounds                                                                                      |
| TK0z. | All | Suicide and selfinflicted poisoning by solid and liquid substances NOS                                                                                |
| TK1.. | All | Suicide + selfinflicted poisoning by gases in domestic use                                                                                            |
| TK10. | All | Suicide and selfinflicted poisoning by gas distributed by pipeline                                                                                    |
| TK11. | All | Suicide and selfinflicted poisoning by liquefied petroleum gas distributed in mobile containers                                                       |
| TK1y. | All | Suicide and selfinflicted poisoning by other utility gas                                                                                              |
| TK1z. | All | Suicide and selfinflicted poisoning by gases in domestic use NOS                                                                                      |
| TK2.. | All | Suicide and selfinflicted poisoning by other gases and vapours                                                                                        |
| TK20. | All | Suicide and selfinflicted poisoning by motor vehicle exhaust gas                                                                                      |
| TK21. | All | Suicide and selfinflicted poisoning by other carbon monoxide                                                                                          |
| TK2y. | All | Suicide and selfinflicted poisoning by other gases and vapours                                                                                        |
| TK2z. | All | Suicide + selfinflicted poisoning by gases and vapours NOS                                                                                            |
| TK3.. | All | Suicide and selfinflicted injury by hanging, strangulation and suffocation                                                                            |
| TK31. | All | Suicide and selfinflicted injury by suffocation by plastic bag                                                                                        |
| TK3y. | All | Suicide and selfinflicted injury by other means of hanging, strangulation and suffocation                                                             |
| TK3z. | All | Suicide and selfinflicted injury by hanging, strangulation and suffocation NOS                                                                        |
| TK4.. | All | Suicide and selfinflicted injury by drowning                                                                                                          |
| TK5.. | All | Suicide and selfinflicted injury by firearms and explosives                                                                                           |
| TK50. | All | Suicide and selfinflicted injury by handgun                                                                                                           |
| TK51. | All | Suicide and selfinflicted injury by shotgun                                                                                                           |
| TK52. | All | Suicide and selfinflicted injury by hunting rifle                                                                                                     |
| TK53. | All | Suicide and selfinflicted injury by military firearms                                                                                                 |
| TK54. | All | Suicide and selfinflicted injury by other firearm                                                                                                     |
| TK55. | All | Suicide and selfinflicted injury by explosives                                                                                                        |
| TK5z. | All | Suicide and selfinflicted injury by firearms and explosives NOS                                                                                       |
| TK6.. | All | Suicide and selfinflicted injury by cutting and stabbing instruments                                                                                  |

|                       |                |                                                                                           |
|-----------------------|----------------|-------------------------------------------------------------------------------------------|
| TK60.                 | All            | Suicide and selfinflicted injury by cutting                                               |
| TK61.                 | All            | Suicide and selfinflicted injury by stabbing                                              |
| TK6z.                 | All            | Suicide and selfinflicted injury by cutting and stabbing instruments NOS                  |
| TK7..                 | All            | Suicide and selfinflicted injury by jumping from high place                               |
| TK70.                 | All            | Suicide and selfinflicted injury by jumping from residential premises                     |
| TK71.                 | All            | Suicide and selfinflicted injury by jumping from other manmade structure                  |
| TK72.                 | All            | Suicide and selfinflicted injury by jumping from natural sites                            |
| TK72.                 | All            | Suicide and selfinflicted injury by jumping from natural sites                            |
| TK7z.                 | All            | Suicide and selfinflicted injury by jumping from high place NOS                           |
| TKx..                 | All            | Suicide and selfinflicted injury by other means                                           |
| TKx0.                 | All            | Suicide and selfinflicted injury by jumping or lying before moving object                 |
| TKx01                 | All            | Suicide and selfinflicted injury by lying before moving object                            |
| TKx0z                 | All            | Suicide and selfinflicted injury by jumping or lying before moving object NOS             |
| TKx1.                 | All            | Suicide and selfinflicted injury by burns or fire                                         |
| TKx2.                 | All            | Suicide and selfinflicted injury by scald                                                 |
| TKx3.                 | All            | Suicide and selfinflicted injury by extremes of cold                                      |
| TKx4.                 | All            | Suicide and selfinflicted injury by electrocution                                         |
| TKx5.                 | All            | Suicide and selfinflicted injury by crashing of motor vehicle                             |
| TKx6.                 | All            | Suicide and selfinflicted injury by crashing of aircraft                                  |
| TKx7.                 | All            | Suicide and selfinflicted injury by caustic substances, except poisoning                  |
| TKxy.                 | All            | Suicide and selfinflicted injury by other specified means                                 |
| TKxz.                 | All            | Suicide and selfinflicted injury by other means NOS                                       |
| TKz..                 | All            | Suicide and selfinflicted injury NOS                                                      |
| <b>Read CTV3 Code</b> | <b>Term ID</b> | <b>Description</b>                                                                        |
| Xa04L                 | All            | Parasuicide                                                                               |
| Xa3jI                 | All            | Attempted suicide NOS                                                                     |
| 146A.                 | All            | H/O: attempted suicide                                                                    |
| XM1Fs                 | All            | Self hanging, strangulation or suffocation                                                |
| TK3..                 | All            | Suicide and selfinflicted injury by hanging, strangulation and suffocation                |
| TK30.                 | All            | Suicide or attempted suicide by hanging                                                   |
| Xa3jC                 | All            | Attempted suicide - hanging                                                               |
| Xa3jL                 | All            | Suicide - hanging                                                                         |
| TK3y.                 | All            | Suicide and selfinflicted injury by other means of hanging, strangulation and suffocation |
| TK3z.                 | All            | Suicide and selfinflicted injury by hanging, strangulation and suffocation NOS            |
| XE22I                 | All            | Suicide and selfinflicted injury by suffocation by plastic bag                            |
| Xa3jD                 | All            | Attempted suicide - suffocation                                                           |
| Xa3jM                 | All            | Suicide - suffocation                                                                     |
| TK0..                 | All            | Suicide and selfinflicted poisoning by solid and liquid substances                        |

|       |     |                                                                               |
|-------|-----|-------------------------------------------------------------------------------|
| TK0z. | All | Suicide and selfinflicted poisoning by solid and liquid substances NOS        |
| TK4.. | All | Suicide and selfinflicted injury by drowning                                  |
| TK5.. | All | Suicide or selfinflicted injury by firearms and explosives                    |
| TK50. | All | Suicide or selfinflicted injury by handgun                                    |
| TK51. | All | Suicide or selfinflicted injury by shotgun                                    |
| TK52. | All | Suicide or selfinflicted injury by hunting rifle                              |
| TK53. | All | Suicide or selfinflicted injury by military firearm                           |
| TK54. | All | Suicide and selfinflicted injury by other firearm                             |
| TK55. | All | Suicide or selfinflicted injury by explosives                                 |
| TK5z. | All | Suicide and selfinflicted injury by firearms and explosives NOS               |
| Xa3jF | All | Attempted suicide - firearms                                                  |
| Xa3jO | All | Suicide - firearms                                                            |
| TK6.. | All | Suicide or selfinflicted injury by cutting and stabbing                       |
| TK60. | All | Suicide or selfinflicted injury by cutting                                    |
| TK61. | All | Suicide or selfinflicted injury by stabbing                                   |
| TK6z. | All | Suicide and selfinflicted injury by cutting and stabbing instruments NOS      |
| Xa3jG | All | Attempted suicide - cut/stab                                                  |
| Xa3jP | All | Suicide - cut/stab                                                            |
| TK7.. | All | Suicide or self injury by jumping from a height                               |
| TK70. | All | Suicide and selfinflicted injury by jumping from residential premises         |
| TK71. | All | Suicide and selfinflicted injury by jumping from other man-made structure     |
| TK72. | All | Suicide and selfinflicted injury by jumping from natural sites                |
| TK72. | All | Suicide and selfinflicted injury by jumping from natural sites                |
| TK7z. | All | Suicide and selfinflicted injury by jumping from high place NOS               |
| X71B6 | All | Suicide or self injury by jumping from high man-made structure                |
| X71B7 | All | Suicide or self injury by jumping from high building                          |
| X71B8 | All | Suicide or self injury by jumping from bridge                                 |
| X71B9 | All | Suicide or self injury by jumping from high natural feature                   |
| X71BA | All | Suicide or self injury by jumping off cliff                                   |
| Xa3jH | All | Attempted suicide - jumping from a high place                                 |
| Xa3jQ | All | Suicide - jumping from a high place                                           |
| TKx.. | All | Suicide and selfinflicted injury by other means                               |
| TKx0. | All | Suicide and selfinflicted injury by jumping or lying before moving object     |
| TKx00 | All | Suicide and selfinflicted injury by jumping before moving object              |
| TKx01 | All | Suicide and selfinflicted injury by lying before moving object                |
| TKx0z | All | Suicide and selfinflicted injury by jumping or lying before moving object NOS |
| TKxy. | All | Suicide and selfinflicted injury by other specified means                     |
| TKxz. | All | Suicide and selfinflicted injury by other means NOS                           |
| TKx1. | All | Suicide or self injury by burning or fire                                     |
| TKx2. | All | Suicide or self injury by scalding                                            |
| X71BF | All | Suicide or self injury by igniting petrol soaked clothing                     |

|       |     |                                                                                           |
|-------|-----|-------------------------------------------------------------------------------------------|
| X71BG | All | Suicide or self injury by arson                                                           |
| TKx3. | All | Suicide or self injury by exposure to cold                                                |
| TKx4. | All | Suicide or self injury by electric current                                                |
| TKx7. | All | Suicide and selfinflicted injury by caustic substances, excluding poisoning               |
| TKz.. | All | Suicide and selfinflicted injury NOS                                                      |
| Xa3jI | All | Attempted suicide NOS                                                                     |
| Xa3jR | All | Suicide NOS                                                                               |
| X71B3 | All | Self poisoning by gas                                                                     |
| TK1.. | All | Suicide and selfinflicted poisoning by gases in domestic use                              |
| TK21. | All | Suicide and selfinflicted poisoning by other carbon monoxide                              |
| TK2y. | All | Suicide and selfinflicted poisoning by other gases and vapours                            |
| TK2z. | All | Suicide and selfinflicted poisoning by gases and vapours NOS                              |
| X71B4 | All | Self poisoning by carbon monoxide                                                         |
| TK20. | All | Self poisoning by motor vehicle exhaust gas                                               |
| X71B5 | All | Self poisoning by coal gas                                                                |
| X71BB | All | Suicide or self injury associated with moving vehicles                                    |
| TKx5. | All | Suicide or selfinflicted injury by crashing motor vehicle                                 |
| TKx6. | All | Suicide or selfinflicted injury by crashing of aircraft                                   |
| X71BC | All | Suicide or self injury by placing self in path of moving vehicle                          |
| X71BD | All | Suicide or self injury by placing self in path of moving motor vehicle                    |
| X71BE | All | Suicide or self injury by placing self in path of moving railway vehicle                  |
| XE22J | All | Suicide or attempted suicide by drowning                                                  |
| Xa3jE | All | Attempted suicide - drowning                                                              |
| Xa3jN | All | Suicide - drowning                                                                        |
| XM1Fs | All | Self hanging, strangulation or suffocation                                                |
| TK3.. | All | Suicide and selfinflicted injury by hanging, strangulation and suffocation                |
| TK30. | All | Suicide or attempted suicide by hanging                                                   |
| Xa3jL | All | Suicide - hanging                                                                         |
| TK3y. | All | Suicide and selfinflicted injury by other means of hanging, strangulation and suffocation |
| TK3z. | All | Suicide and selfinflicted injury by hanging, strangulation and suffocation NOS            |
| XE22I | All | Suicide and selfinflicted injury by suffocation by plastic bag                            |
| Xa3jD | All | Attempted suicide - suffocation                                                           |
| Xa3jM | All | Suicide - suffocation                                                                     |
| TK50. | All | Suicide or selfinflicted injury by handgun                                                |
| Ua1AA | All | Hanging self                                                                              |
| Ua1AB | All | Drowning self                                                                             |
| Ua1A9 | All | Jumping from height                                                                       |
| Ua1A8 | All | Jumping from building                                                                     |
| Ua1A7 | All | Jumping from bridge                                                                       |
| Ua14U | All | Jumping from cliff                                                                        |
| Ua1AE | All | Self-asphyxiation                                                                         |

|       |     |                                                                                                                                                       |
|-------|-----|-------------------------------------------------------------------------------------------------------------------------------------------------------|
| Ua1AD | All | Self-strangulation                                                                                                                                    |
| Ua1AC | All | Self-suffocation                                                                                                                                      |
| Ua14S | All | Throwing self in front of vehicle                                                                                                                     |
| Ua14T | All | Throwing self in front of train                                                                                                                       |
| X71B0 | All | Self poisoning by non-drug solid or liquid agents                                                                                                     |
| TK07. | All | Self poisoning by corrosive or caustic substance                                                                                                      |
| TK08. | All | Self poisoning by arsenic or its compounds                                                                                                            |
| X71B2 | All | Self poisoning by plants or parts of plants                                                                                                           |
| XM1FX | All | Self poisoning by agricultural chemical                                                                                                               |
| TK06. | All | Suicide and selfinflicted poisoning by agricultural and horticultural chemical and pharmaceutical preparations other than plant foods and fertilizers |
| X71B1 | All | Self poisoning by paraquat                                                                                                                            |
| Ua14R | All | Shooting self                                                                                                                                         |
| Xa2pL | All | Stabbing self                                                                                                                                         |
| U21.. | All | [X]Intent self harm by hanging, strangulation/suffocation                                                                                             |
| U210. | All | [X]Int self harm by hanging, strangulation/suffocation occ home                                                                                       |
| U211. | All | [X]Intent self harm by hanging, strangulation/suffocation at res institut                                                                             |
| U212. | All | [X]Int self harm by hanging, strangulation/suffocation in school/pub admin area                                                                       |
| U213. | All | [X]Intent self harm by hanging, strangulation/suffocation in sport/athletic area                                                                      |
| U214. | All | [X]Int self harm by hanging, strangulation/suffocation in street/highway                                                                              |
| U215. | All | [X]Intent self harm by hanging, strangulation/suffocation trade/service area                                                                          |
| U216. | All | [X]Int self harm by hanging, strangulation/suffocation indust/construct area                                                                          |
| U217. | All | [X]Int self harm by hanging, strangulation/suffocation occ farm                                                                                       |
| U21y. | All | [X]Int self harm by hanging, strangulation/suffocation other spec place                                                                               |
| U21z. | All | [X]Intent self harm by hanging, strangulation/suffocation unspecif place                                                                              |
| U22.. | All | [X]Intent self harm by drowning and submersion                                                                                                        |
| U220. | All | [X]Int self harm by drowning and submersion occ home                                                                                                  |
| U221. | All | [X]Intent self harm by drowning and submersion at res institut                                                                                        |
| U222. | All | [X]Int self harm by drowning and submersion in school/pub admin area                                                                                  |
| U223. | All | [X]Intent self harm by drowning and submersion in sport/athletic area                                                                                 |
| U224. | All | [X]Int self harm by drowning and submersion in street/highway                                                                                         |
| U225. | All | [X]Intent self harm by drowning and submersion trade/service area                                                                                     |
| U226. | All | [X]Int self harm by drowning and submersion indust/construct area                                                                                     |
| U227. | All | [X]Int self harm by drowning and submersion occ farm                                                                                                  |
| U22y. | All | [X]Int self harm by drowning and submersion other spec place                                                                                          |
| U22z. | All | [X]Intent self harm by drowning and submersion unspecif place                                                                                         |
| U23.. | All | [X]Intent self harm by handgun discharge                                                                                                              |



|       |     |                                                                                                                                                 |
|-------|-----|-------------------------------------------------------------------------------------------------------------------------------------------------|
| U230. | All | [X]Int self harm by handgun discharge occ home                                                                                                  |
| U231. | All | [X]Intent self harm by handgun discharge at res institut                                                                                        |
| U232. | All | [X]Int self harm by handgun discharge in school/pub admin area                                                                                  |
| U233. | All | [X]Intent self harm by handgun discharge in sport/athletic area                                                                                 |
| U234. | All | [X]Int self harm by handgun discharge in street/highway                                                                                         |
| U235. | All | [X]Intent self harm by handgun discharge trade/service area                                                                                     |
| U236. | All | [X]Int self harm by handgun discharge indust/construct area                                                                                     |
| U237. | All | [X]Int self harm by handgun discharge occ farm                                                                                                  |
| U23y. | All | [X]Int self harm by handgun discharge other spec place                                                                                          |
| U23z. | All | [X]Intent self harm by handgun discharge unspecif place                                                                                         |
| U24.. | All | [X]Intentional self harm by rifle, shotgun and larger firearm discharge                                                                         |
| U240. | All | [X]Intentional self harm by rifle, shotgun and larger firearm discharge, occurrence at home                                                     |
| U241. | All | [X]Intentional self harm by rifle, shotgun and larger firearm discharge, occurrence in residential institution                                  |
| U242. | All | [X]Intentional self harm by rifle, shotgun and larger firearm discharge, occurrence at school, other institution and public administrative area |
| U243. | All | [X]Intentional self harm by rifle, shotgun and larger firearm discharge, occurrence at sports and athletics area                                |
| U244. | All | [X]Intentional self harm by rifle, shotgun and larger firearm discharge, occurrence on street and highway                                       |
| U245. | All | [X]Intentional self harm by rifle, shotgun and larger firearm discharge, occurrence at trade and service area                                   |
| U246. | All | [X]Intentional self harm by rifle, shotgun and larger firearm discharge, occurrence at industrial and construction area                         |
| U247. | All | [X]Intentional self harm by rifle, shotgun and larger firearm discharge, occurrence on farm                                                     |
| U24y. | All | [X]Intentional self harm by rifle, shotgun and larger firearm discharge, occurrence at other specified place                                    |
| U24z. | All | [X]Intentional self harm by rifle, shotgun and larger firearm discharge, occurrence at unspecified place                                        |
| U25.. | All | [X]Intentional self harm by other and unspecified firearm discharge                                                                             |
| U250. | All | [X]Intentional self harm by other and unspecified firearm discharge, occurrence at home                                                         |
| U251. | All | [X]Intentional self harm by other and unspecified firearm discharge, occurrence in residential institution                                      |
| U252. | All | [X]Intentional self harm by other and unspecified firearm discharge, occurrence at school, other institution and public administrative area     |
| U253. | All | [X]Intentional self harm by other and unspecified firearm discharge, occurrence at sports and athletics area                                    |
| U254. | All | [X]Intentional self harm by other and unspecified firearm discharge, occurrence on street and highway                                           |
| U255. | All | [X]Intentional self harm by other and unspecified firearm discharge, occurrence at trade and service area                                       |
| U256. | All | [X]Intentional self harm by other and unspecified firearm discharge, occurrence at industrial and construction area                             |
| U257. | All | [X]Intentional self harm by other and unspecified firearm discharge, occurrence on farm                                                         |



|       |     |                                                                                                                                           |
|-------|-----|-------------------------------------------------------------------------------------------------------------------------------------------|
| U25y. | All | <input checked="" type="checkbox"/> Intentional self harm by other and unspecified firearm discharge, occurrence at other specified place |
| U25z. | All | <input checked="" type="checkbox"/> Intentional self harm by other and unspecified firearm discharge, occurrence at unspecified place     |

For peer review only

**Supplementary table S2.9.** Read codes used to identify overdose.

| <b>Medication overdose</b> |                |                                                                 |
|----------------------------|----------------|-----------------------------------------------------------------|
| <b>Read V2 Code</b>        | <b>Term ID</b> | <b>Description</b>                                              |
| U20..                      | All            | [X]Intentional self poisoning /exposure to noxious substance    |
| U200.                      | All            | [X]Intent self poison/exposure to nonopioid analgesic           |
| U2000                      | All            | [X]Int self poison/exposure to nonopioid analgesic at home      |
| U2001                      | All            | [X]Intent self poison nonopioid analgesic at res institut       |
| U2002                      | All            | [X]Int self poison nonopioid analgesic in school/pub admin area |
| U2003                      | All            | [X]Intent self pois nonopioid analgesic in sport/athletic area  |
| U2004                      | All            | [X]Int self pois to nonopioid analgesic in street/highway       |
| U2005                      | All            | [X]Intent self pois to nonopioid analgesic trade/service area   |
| U2006                      | All            | [X]Int self pois to nonopioid analgesic indust/construct area   |
| U2007                      | All            | [X]Int self poison/exposure to nonopioid analgesic on farm      |
| U200y                      | All            | [X]Int self poison nonopioid analgesic other spec place         |
| U200z                      | All            | [X]Intent self poison to nonopioid analgesic unspecif place     |
| U201.                      | All            | [X]Intent self poison/exposure to antiepileptic                 |
| U2010                      | All            | [X]Int self poison/exposure to antiepileptic at home            |
| U2011                      | All            | [X]Intent self poison antiepileptic at res institut             |
| U2012                      | All            | [X]Int self poison antiepileptic in school/pub admin area       |
| U2013                      | All            | [X]Intent self pois antiepileptic in sport/athletic area        |
| U2014                      | All            | [X]Int self pois antiepileptic in street/highway                |
| U2015                      | All            | [X]Intent self pois antiepileptic trade/service area            |
| U2016                      | All            | [X]Int self poison antiepileptic indust/construct area          |
| U2017                      | All            | [X]Int self poison/exposure to antiepileptic on farm            |
| U201y                      | All            | [X]Int self poison antiepileptic other spec place               |
| U201z                      | All            | [X]Intent self poison antiepileptic unspecif place              |
| U202.                      | All            | [X]Intent self poison/exposure to sedative hypnotic             |
| U2020                      | All            | [X]Int self poison/exposure to sedative hypnotic at home        |
| U2021                      | All            | [X]Intent self poison sedative hypnotic at res institut         |
| U2022                      | All            | [X]Int self poison sedative hypnotic in school/pub admin area   |
| U2023                      | All            | [X]Intent self pois sedative hypnotic in sport/athletic area    |
| U2024                      | All            | [X]Int self pois sedative hypnotic in street/highway            |
| U2025                      | All            | [X]Intent self pois sedative hypnotic trade/service area        |
| U2026                      | All            | [X]Int self poison sedative hypnotic indust/construct area      |
| U2027                      | All            | [X]Int self poison/exposure to sedative hypnotic on farm        |
| U202y                      | All            | [X]Int self poison sedative hypnotic other spec place           |
| U202z                      | All            | [X]Intent self poison sedative hypnotic unspecif place          |
| U203.                      | All            | [X]Intent self poison/exposure to antiparkinson drug            |
| U2030                      | All            | [X]Int self poison/exposure to antiparkinson drug at home       |
| U2031                      | All            | [X]Intent self poison antiparkinson drug at res institut        |
| U2032                      | All            | [X]Int self poison antiparkinson drug in school/pub admin area  |
| U2033                      | All            | [X]Intent self pois antiparkinson drug in sport/athletic area   |
| U2034                      | All            | [X]Int self pois antiparkinson drug in street/highway           |

|    |       |     |                                                               |
|----|-------|-----|---------------------------------------------------------------|
| 1  | U2035 | All | [X]Intent self pois antiparkinson drug trade/service area     |
| 2  | U2036 | All | [X]Int self poison antiparkinson drug indust/construct area   |
| 3  | U2037 | All | [X]Int self poison/exposure to antiparkinson drug on farm     |
| 4  | U203y | All | [X]Int self poison antiparkinson drug other spec place        |
| 5  | U203z | All | [X]Intent self poison antiparkinson drug unspecif place       |
| 6  | U204. | All | [X]Intent self poison/exposure to psychotropic drug           |
| 7  | U2040 | All | [X]Int self poison/exposure to psychotropic drug at home      |
| 8  | U2041 | All | [X]Intent self poison psychotropic drug at res institut       |
| 9  | U2042 | All | [X]Int self poison psychotropic drug in school/pub admin area |
| 10 | U2043 | All | [X]Intent self pois psychotropic drug in sport/athletic area  |
| 11 | U2044 | All | [X]Int self pois psychotropic drug in street/highway          |
| 12 | U2045 | All | [X]Intent self pois psychotropic drug trade/service area      |
| 13 | U2046 | All | [X]Int self poison psychotropic drug indust/construct area    |
| 14 | U2047 | All | [X]Int self poison/exposure to psychotropic drug on farm      |
| 15 | U204y | All | [X]Int self poison psychotropic drug other spec place         |
| 16 | U204z | All | [X]Intent self poison psychotropic drug unspecif place        |
| 17 | U205. | All | [X]Intent self poison/exposure to narcotic drug               |
| 18 | U2050 | All | [X]Int self poison/exposure to narcotic drug at home          |
| 19 | U2051 | All | [X]Intent self poison narcotic drug at res institut           |
| 20 | U2052 | All | [X]Int self poison narcotic drug in school/pub admin area     |
| 21 | U2053 | All | [X]Intent self pois narcotic drug in sport/athletic area      |
| 22 | U2054 | All | [X]Int self pois narcotic drug in street/highway              |
| 23 | U2055 | All | [X]Intent self pois narcotic drug trade/service area          |
| 24 | U2056 | All | [X]Int self poison narcotic drug indust/construct area        |
| 25 | U2057 | All | [X]Int self poison/exposure to narcotic drug on farm          |
| 26 | U205y | All | [X]Int self poison narcotic drug other spec place             |
| 27 | U205z | All | [X]Intent self poison narcotic drug unspecif place            |
| 28 | U206. | All | [X]Intent self poison/exposure to hallucinogen                |
| 29 | U2060 | All | [X]Int self poison/exposure to hallucinogen at home           |
| 30 | U2061 | All | [X]Intent self poison hallucinogen at res institut            |
| 31 | U2062 | All | [X]Int self poison hallucinogen in school/pub admin area      |
| 32 | U2063 | All | [X]Intent self pois hallucinogen in sport/athletic area       |
| 33 | U2064 | All | [X]Int self pois hallucinogen in street/highway               |
| 34 | U2065 | All | [X]Intent self pois hallucinogen trade/service area           |
| 35 | U2066 | All | [X]Int self poison hallucinogen indust/construct area         |
| 36 | U2067 | All | [X]Int self poison/exposure to hallucinogen on farm           |
| 37 | U206y | All | [X]Int self poison hallucinogen other spec place              |
| 38 | U206z | All | [X]Intent self poison hallucinogen unspecif place             |
| 39 | U207. | All | [X]Intent self poison/exposure to oth autonom drug            |
| 40 | U2070 | All | [X]Int self poison/exposure to oth autonom drug at home       |
| 41 | U2071 | All | [X]Intent self poison oth autonom drug at res institut        |
| 42 | U2072 | All | [X]Int self poison oth autonom drug in school/pub admin area  |
| 43 | U2073 | All | [X]Intent self pois oth autonom drug in sport/athletic area   |
| 44 | U2074 | All | [X]Int self pois oth autonom drug in street/highway           |
| 45 | U2075 | All | [X]Intent self pois oth autonom drug trade/service area       |

|       |     |                                                                               |
|-------|-----|-------------------------------------------------------------------------------|
| U2076 | All | [X]Int self poison oth autonom drug indust/construct area                     |
| U2077 | All | [X]Int self poison/exposure to oth autonom drug on farm                       |
| U207y | All | [X]Int self poison oth autonom drug other spec place                          |
| U207z | All | [X]Intent self poison oth autonom drug unspecif place                         |
| U208. | All | [X]Intent self poison/exposure to other/unspec drug/medicament                |
| U2080 | All | [X]Int self poison/exposure to other/unspec drug/medicament at home           |
| U2081 | All | [X]Intent self poison other/unspec drug/medicament at res institut            |
| U2082 | All | [X]Int self poison other/unspec drug/medicament in school/pub admin area      |
| U2083 | All | [X]Intent self pois other/unspec drug/medicament in sport/athletic area       |
| U2084 | All | [X]Int self pois other/unspec drug/medicament in street/highway               |
| U2085 | All | [X]Intent self pois other/unspec drug/medicament trade/service area           |
| U2086 | All | [X]Int self poison other/unspec drug/medicament indust/construct area         |
| U2087 | All | [X]Int self poison/exposure to other/unspec drug/medicament on farm           |
| U208y | All | [X]Int self poison other/unspec drug/medicament other spec place              |
| U208z | All | [X]Intent self poison other/unspec drug/medicament unspecif place             |
| U209. | All | [X]Intent self poison/exposure to alcohol                                     |
| U2090 | All | [X]Int self poison/exposure to alcohol at home                                |
| U2091 | All | [X]Intent self poison alcohol at res institut                                 |
| U2092 | All | [X]Int self poison alcohol in school/pub admin area                           |
| U2093 | All | [X]Intent self pois alcohol in sport/athletic area                            |
| U2094 | All | [X]Int self pois alcohol in street/highway                                    |
| U2095 | All | [X]Intent self pois alcohol trade/service area                                |
| U2096 | All | [X]Int self poison alcohol indust/construct area                              |
| U2097 | All | [X]Int self poison/exposure alcohol on farm                                   |
| U209y | All | [X]Int self poison alcohol other spec place                                   |
| U209z | All | [X]Intent self poison alcohol unspecif place                                  |
| U20A. | All | [X]Intent self poison/exposure to organ solvent, halogen, hydrocarb           |
| U20A0 | All | [X]Int self poison/exposure to organ solvent, halogen, hydrocarb at home      |
| U20A1 | All | [X]Intent self poison organ solvent, halogen, hydrocarb at res institut       |
| U20A2 | All | [X]Int self poison organ solvent, halogen, hydrocarb in school/pub admin area |
| U20A3 | All | [X]Intent self pois organ solvent, halogen, hydrocarb in sport/athletic area  |
| U20A4 | All | [X]Int self pois organ solvent, halogen, hydrocarb in street/highway          |
| U20A5 | All | [X]Intent self pois organ solvent, halogen, hydrocarb trade/service area      |
| U20A6 | All | [X]Int self poison organ solvent, halogen, hydrocarb indust/construct area    |
| U20A7 | All | [X]Int self poison/exposure organ solvent, halogen, hydrocarb on farm         |
| U20Ay | All | [X]Int self poison organ solvent, halogen, hydrocarb other spec place         |

|                       |                |                                                                        |
|-----------------------|----------------|------------------------------------------------------------------------|
| U20Az                 | All            | [X]Intent self poison organ solvent, halogen, hydrocarb unspecif place |
| U20B.                 | All            | [X]Intent self poison/exposure to other gas/vapour                     |
| U20B0                 | All            | [X]Int self poison/exposure to other gas/vapour at home                |
| U20B1                 | All            | [X]Intent self poison other gas/vapour at res institut                 |
| U20B2                 | All            | [X]Int self poison other gas/vapour in school/pub admin area           |
| U20B3                 | All            | [X]Intent self pois other gas/vapour in sport/athletic area            |
| U20B4                 | All            | [X]Int self pois other gas/vapour in street/highway                    |
| U20B5                 | All            | [X]Intent self pois other gas/vapour trade/service area                |
| U20B6                 | All            | [X]Int self poison other gas/vapour indust/construct area              |
| U20B7                 | All            | [X]Int self poison/exposure other gas/vapourl on farm                  |
| U20By                 | All            | [X]Int self poison other gas/vapour other spec place                   |
| U20Bz                 | All            | [X]Intent self poison other gas/vapour unspecif place                  |
| U20C.                 | All            | [X]Intent self poison/exposure to pesticide                            |
| U20C0                 | All            | [X]Int self poison/exposure to pesticide at home                       |
| U20C1                 | All            | [X]Intent self poison pesticide at res institut                        |
| U20C2                 | All            | [X]Int self poison pesticide in school/pub admin area                  |
| U20C3                 | All            | [X]Intent self pois pesticide in sport/athletic area                   |
| U20C4                 | All            | [X]Int self pois pesticide in street/highway                           |
| U20C5                 | All            | [X]Intent self pois pesticidel trade/service area                      |
| U20C6                 | All            | [X]Int self poison pesticide indust/construct area                     |
| U20C7                 | All            | [X]Int self poison/exposure pesticide on farm                          |
| U20Cy                 | All            | [X]Int self poison pesticide other spec place                          |
| U20Cz                 | All            | [X]Intent self poison pesticide unspecif place                         |
| U20y.                 | All            | [X]Intent self poison/exposure to unspecif chemical                    |
| U20y0                 | All            | [X]Int self poison/exposure to unspecif chemical at home               |
| U20y1                 | All            | [X]Intent self poison unspecif chemical at res institut                |
| U20y2                 | All            | [X]Int self poison unspecif chemical in school/pub admin area          |
| U20y3                 | All            | [X]Intent self pois unspecif chemical in sport/athletic area           |
| U20y4                 | All            | [X]Int self pois unspecif chemical in street/highway                   |
| U20y5                 | All            | [X]Intent self pois unspecif chemical trade/service area               |
| U20y6                 | All            | [X]Int self poison unspecif chemical indust/construct area             |
| U20y7                 | All            | [X]Int self poison/exposure unspecif chemical on farm                  |
| U20yy                 | All            | [X]Int self poison unspecif chemical other spec place                  |
| U20yz                 | All            | [X]Intent self poison unspecif chemical unspecif place                 |
| 14K0.                 | All            | H/O: repeated overdose                                                 |
| 1JP..                 | All            | Suspected drug overdose                                                |
| TK...                 | All            | Cause of overdose - deliberate                                         |
| <b>Read CTV3 Code</b> | <b>Term ID</b> | <b>Description</b>                                                     |
| U200.                 | All            | [X]Intent self poison/exposure to nonopioid analgesic                  |
| U2000                 | All            | [X]Int self poison/exposure to nonopioid analgesic at home             |
| U2001                 | All            | [X]Intent self poison nonopioid analgesic at res institut              |
| U2002                 | All            | [X]Int self poison nonopioid analgesic in school/pub admin area        |
| U2003                 | All            | [X]Intent self pois nonopioid analgesic in sport/athletic area         |

|    |       |     |                                                                |
|----|-------|-----|----------------------------------------------------------------|
| 1  |       |     |                                                                |
| 2  |       |     |                                                                |
| 3  |       |     |                                                                |
| 4  | U2004 | All | [X]Int self pois to nonopioid analgesic in street/highway      |
| 5  | U2005 | All | [X]Intent self pois to nonopioid analgesic trade/service area  |
| 6  | U2006 | All | [X]Int self pois to nonopioid analgesic indust/construct area  |
| 7  | U2007 | All | [X]Int self poison/exposure to nonopioid analgesic on farm     |
| 8  | U200y | All | [X]Int self poison nonopioid analgesic other spec place        |
| 9  | U200z | All | [X]Intent self poison to nonopioid analgesic unspecif place    |
| 10 | U201. | All | [X]Intent self poison/exposure to antiepileptic                |
| 11 | U2010 | All | [X]Int self poison/exposure to antiepileptic at home           |
| 12 | U2011 | All | [X]Intent self poison antiepileptic at res institut            |
| 13 | U2012 | All | [X]Int self poison antiepileptic in school/pub admin area      |
| 14 | U2013 | All | [X]Intent self pois antiepileptic in sport/athletic area       |
| 15 | U2014 | All | [X]Int self pois antiepileptic in street/highway               |
| 16 | U2015 | All | [X]Intent self pois antiepileptic trade/service area           |
| 17 | U2016 | All | [X]Int self poison antiepileptic indust/construct area         |
| 18 | U2017 | All | [X]Int self poison/exposure to antiepileptic on farm           |
| 19 | U201y | All | [X]Int self poison antiepileptic other spec place              |
| 20 | U201z | All | [X]Intent self poison antiepileptic unspecif place             |
| 21 | U2030 | All | [X]Int self poison/exposure to antiparkinson drug at home      |
| 22 | U2031 | All | [X]Intent self poison antiparkinson drug at res institut       |
| 23 | U2032 | All | [X]Int self poison antiparkinson drug in school/pub admin area |
| 24 | U2033 | All | [X]Intent self pois antiparkinson drug in sport/athletic area  |
| 25 | U2034 | All | [X]Int self pois antiparkinson drug in street/highway          |
| 26 | U2035 | All | [X]Intent self pois antiparkinson drug trade/service area      |
| 27 | U2036 | All | [X]Int self poison antiparkinson drug indust/construct area    |
| 28 | U2037 | All | [X]Int self poison/exposure to antiparkinson drug on farm      |
| 29 | U203y | All | [X]Int self poison antiparkinson drug other spec place         |
| 30 | U203z | All | [X]Intent self poison antiparkinson drug unspecif place        |
| 31 | XE22f | All | [X]Intent self poison/exposure to narcotic drug                |
| 32 | U2050 | All | [X]Int self poison/exposure to narcotic drug at home           |
| 33 | U2051 | All | [X]Intent self poison narcotic drug at res institut            |
| 34 | U2052 | All | [X]Int self poison narcotic drug in school/pub admin area      |
| 35 | U2053 | All | [X]Intent self pois narcotic drug in sport/athletic area       |
| 36 | U2054 | All | [X]Int self pois narcotic drug in street/highway               |
| 37 | U2055 | All | [X]Intent self pois narcotic drug trade/service area           |
| 38 | U2056 | All | [X]Int self poison narcotic drug indust/construct area         |
| 39 | U2057 | All | [X]Int self poison/exposure to narcotic drug on farm           |
| 40 | U205y | All | [X]Int self poison narcotic drug other spec place              |
| 41 | U205z | All | [X]Intent self poison narcotic drug unspecif place             |
| 42 | U206. | All | [X]Intent self poison/exposure to hallucinogen                 |
| 43 | U2060 | All | [X]Int self poison/exposure to hallucinogen at home            |
| 44 | U2061 | All | [X]Intent self poison hallucinogen at res institut             |
| 45 | U2062 | All | [X]Int self poison hallucinogen in school/pub admin area       |
| 46 | U2063 | All | [X]Intent self pois hallucinogen in sport/athletic area        |
| 47 | U2064 | All | [X]Int self pois hallucinogen in street/highway                |
| 48 | U2065 | All | [X]Intent self pois hallucinogen trade/service area            |
| 49 |       |     |                                                                |
| 50 |       |     |                                                                |
| 51 |       |     |                                                                |
| 52 |       |     |                                                                |
| 53 |       |     |                                                                |
| 54 |       |     |                                                                |
| 55 |       |     |                                                                |
| 56 |       |     |                                                                |
| 57 |       |     |                                                                |
| 58 |       |     |                                                                |
| 59 |       |     |                                                                |
| 60 |       |     |                                                                |



|       |     |                                                                          |
|-------|-----|--------------------------------------------------------------------------|
| U2066 | All | [X]Int self poison hallucinogen indust/construct area                    |
| U2067 | All | [X]Int self poison/exposure to hallucinogen on farm                      |
| U206y | All | [X]Int self poison hallucinogen other spec place                         |
| U206z | All | [X]Intent self poison hallucinogen unspecif place                        |
| U207. | All | [X]Intent self poison/exposure to oth autonom drug                       |
| U2070 | All | [X]Int self poison/exposure to oth autonom drug at home                  |
| U2071 | All | [X]Intent self poison oth autonom drug at res institut                   |
| U2072 | All | [X]Int self poison oth autonom drug in school/pub admin area             |
| U2073 | All | [X]Intent self pois oth autonom drug in sport/athletic area              |
| U2074 | All | [X]Int self pois oth autonom drug in street/highway                      |
| U2075 | All | [X]Intent self pois oth autonom drug trade/service area                  |
| U2076 | All | [X]Int self poison oth autonom drug indust/construct area                |
| U2077 | All | [X]Int self poison/exposure to oth autonom drug on farm                  |
| U207y | All | [X]Int self poison oth autonom drug other spec place                     |
| U207z | All | [X]Intent self poison oth autonom drug unspecif place                    |
| U208. | All | [X]Intent self poison/exposure to other/unspec drug/medicament           |
| U2080 | All | [X]Int self poison/exposure to other/unspec drug/medicament at home      |
| U2081 | All | [X]Intent self poison other/unspec drug/medicament at res institut       |
| U2082 | All | [X]Int self poison other/unspec drug/medicament in school/pub admin area |
| U2083 | All | [X]Intent self pois other/unspec drug/medicament in sport/athletic area  |
| U2084 | All | [X]Int self pois other/unspec drug/medicament in street/highway          |
| U2085 | All | [X]Intent self pois other/unspec drug/medicament trade/service area      |
| U2086 | All | [X]Int self poison other/unspec drug/medicament indust/construct area    |
| U2087 | All | [X]Int self poison/exposure to other/unspec drug/medicament on farm      |
| U208y | All | [X]Int self poison other/unspec drug/medicament other spec place         |
| U208z | All | [X]Intent self poison other/unspec drug/medicament unspecif place        |
| SyuFc | All | [X]Poisoning by other & unspecified drugs and biologic substances        |
| U209. | All | [X]Intent self poison/exposure to alcohol                                |
| U2090 | All | [X]Int self poison/exposure to alcohol at home                           |
| U2091 | All | [X]Intent self poison alcohol at res institut                            |
| U2092 | All | [X]Int self poison alcohol in school/pub admin area                      |
| U2093 | All | [X]Intent self pois alcohol in sport/athletic area                       |
| U2094 | All | [X]Int self pois alcohol in street/highway                               |
| U2095 | All | [X]Intent self pois alcohol trade/service area                           |
| U2096 | All | [X]Int self poison alcohol indust/construct area                         |
| U2097 | All | [X]Int self poison/exposure alcohol on farm                              |
| U209y | All | [X]Int self poison alcohol other spec place                              |
| U209z | All | [X]Intent self poison alcohol unspecif place                             |
| U20A. | All | [X]Intent self poison/exposure to organ solvent, halogen, hydrocarb      |
| U20A0 | All | [X]Int self poison/exposure to organ solvent, halogen, hydrocarb at home |



|    |       |     |                                                                               |
|----|-------|-----|-------------------------------------------------------------------------------|
| 1  |       |     |                                                                               |
| 2  |       |     |                                                                               |
| 3  |       |     |                                                                               |
| 4  | U20A1 | All | [X]Intent self poison organ solvent, halogen, hydrocarbat res institut        |
| 5  | U20A2 | All | [X]Int self poison organ solvent, halogen, hydrocarb in school/pub admin area |
| 6  |       |     |                                                                               |
| 7  | U20A3 | All | [X]Intent self pois organ solvent, halogen, hydrocarb in sport/athletic area  |
| 8  |       |     |                                                                               |
| 9  | U20A4 | All | [X]Int self pois organ solvent, halogen, hydrocarb in street/highway          |
| 10 |       |     |                                                                               |
| 11 | U20A5 | All | [X]Intent self pois organ solvent, halogen, hydrocarb trade/service area      |
| 12 |       |     |                                                                               |
| 13 | U20A6 | All | [X]Int self poison organ solvent, halogen, hydrocarb indust/construct area    |
| 14 |       |     |                                                                               |
| 15 | U20A7 | All | [X]Int self poison/exposure organ solvent, halogen, hydrocarb on farm         |
| 16 |       |     |                                                                               |
| 17 | U20Ay | All | [X]Int self poison organ solvent, halogen, hydrocarb other spec place         |
| 18 |       |     |                                                                               |
| 19 | U20Az | All | [X]Intent self poison organ solvent, halogen, hydrocarb unspecif place        |
| 20 |       |     |                                                                               |
| 21 | XE22g | All | [X]Intent self poison/exposure to other gas/vapour                            |
| 22 | U20B0 | All | [X]Int self poison/exposure to other gas/vapour at home                       |
| 23 | U20B1 | All | [X]Intent self poison other gas/vapour at res institut                        |
| 24 | U20B2 | All | [X]Int self poison other gas/vapour in school/pub admin area                  |
| 25 | U20B3 | All | [X]Intent self pois other gas/vapour in sport/athletic area                   |
| 26 | U20B4 | All | [X]Int self pois other gas/vapour in street/highway                           |
| 27 | U20B5 | All | [X]Intent self pois other gas/vapour trade/service area                       |
| 28 | U20B6 | All | [X]Int self poison other gas/vapour indust/construct area                     |
| 29 | U20B7 | All | [X]Int self poison/exposure other gas/vapourl on farm                         |
| 30 |       |     |                                                                               |
| 31 | U20By | All | [X]Int self poison other gas/vapour other spec place                          |
| 32 | U20Bz | All | [X]Intent self poison other gas/vapour unspecif place                         |
| 33 |       |     |                                                                               |
| 34 | U20C. | All | [X]Intent self poison/exposure to pesticide                                   |
| 35 | U20C0 | All | [X]Int self poison/exposure to pesticide at home                              |
| 36 | U20C1 | All | [X]Intent self poison pesticide at res institut                               |
| 37 | U20C2 | All | [X]Int self poison pesticide in school/pub admin area                         |
| 38 | U20C3 | All | [X]Intent self pois pesticide in sport/athletic area                          |
| 39 | U20C4 | All | [X]Int self pois pesticide in street/highway                                  |
| 40 | U20C5 | All | [X]Intent self pois pesticidel trade/service area                             |
| 41 | U20C6 | All | [X]Int self poison pesticide indust/construct area                            |
| 42 | U20C7 | All | [X]Int self poison/exposure pesticide on farm                                 |
| 43 | U20Cy | All | [X]Int self poison pesticide other spec place                                 |
| 44 | U20Cz | All | [X]Intent self poison pesticide unspecif place                                |
| 45 |       |     |                                                                               |
| 46 | Xa59l | All | Intentional pesticide product poisoning                                       |
| 47 | U20y. | All | [X]Intent self poison/exposure to unspecif chemical                           |
| 48 | U20y0 | All | [X]Int self poison/exposure to unspecif chemical at home                      |
| 49 | U20y1 | All | [X]Intent self poison unspecif chemical at res institut                       |
| 50 | U20y2 | All | [X]Int self poison unspecif chemical in school/pub admin area                 |
| 51 | U20y3 | All | [X]Intent self pois unspecif chemical in sport/athletic area                  |
| 52 | U20y4 | All | [X]Int self pois unspecif chemical in street/highway                          |
| 53 | U20y5 | All | [X]Intent self pois unspecif chemical trade/service area                      |
| 54 | U20y6 | All | [X]Int self poison unspecif chemical indust/construct area                    |
| 55 |       |     |                                                                               |
| 56 |       |     |                                                                               |
| 57 |       |     |                                                                               |
| 58 |       |     |                                                                               |
| 59 |       |     |                                                                               |
| 60 |       |     |                                                                               |

|       |     |                                                                                     |
|-------|-----|-------------------------------------------------------------------------------------|
| U20y7 | All | [X]Int self poison/exposure unspecif chemical on farm                               |
| U20yy | All | [X]Int self poison unspecif chemical other spec place                               |
| U20yz | All | [X]Intent self poison unspecif chemical unspecif place                              |
| TK0z. | All | Suicide and selfinflicted poisoning by solid and liquid substances NOS              |
| XM0Ba | All | Deliberate self poisoning                                                           |
| TK0.. | All | Suicide and selfinflicted poisoning by solid and liquid substances                  |
| X71Am | All | Deliberate overdose of drug or pharmaceutical preparation                           |
| TK00. | All | Suicide and selfinflicted poisoning by analgesics, antipyretics and anti-rheumatics |
| TK01. | All | Suicide and selfinflicted poisoning by barbiturates                                 |
| TK010 | All | Suicide and self inflicted injury by amobarbital                                    |
| TK011 | All | Suicide and self inflicted injury by Barbitone                                      |
| TK012 | All | Suicide and self inflicted injury by Butabarbitone                                  |
| TK013 | All | Suicide and self inflicted injury by Pentabarbitone                                 |
| TK014 | All | Suicide and self inflicted injury by phenobarbital                                  |
| TK015 | All | Suicide and self inflicted injury by secobarbital                                   |
| TK01z | All | Suicide and self inflicted injury by barbiturates                                   |
| TK02. | All | Suicide and selfinflicted poisoning by other sedatives and hypnotics                |
| TK03. | All | Suicide and selfinflicted poisoning by tranquillisers and other psychotropic agents |
| TK04. | All | Suicide and selfinflicted poisoning by other drugs and medicines                    |
| TK05. | All | Suicide and selfinflicted poisoning by drug or medicine NOS                         |
| X71Ap | All | Deliberate overdose of aspirin                                                      |
| X71Ax | All | Deliberate overdose of diazepam                                                     |
| X71Av | All | Deliberate overdose of methadone                                                    |
| X71Az | All | Deliberate overdose of temazepam                                                    |
| X71Ar | All | Deliberate overdose of co-proxamol                                                  |
| X71At | All | Deliberate overdose of diamorphine                                                  |
| X71Aw | All | Deliberate overdose of benzodiazepine                                               |
| X71Au | All | Deliberate overdose of dihydrocodeine                                               |
| X71As | All | Deliberate overdose of opiate analgesic                                             |
| X71Ay | All | Deliberate overdose of chlordiazepoxide                                             |
| X71Aq | All | Deliberate overdose of combined analgesic                                           |
| X71An | All | Deliberate overdose of non-opiate analgesics                                        |
| Xa0Jl | All | Deliberate overdose of non-steroidal anti-inflammatory agent                        |
| XaR4S | All | Intentional overdose of prescription only medication                                |
| Xa62F | All | Intentional over-the-counter product overdose                                       |
| Xa65i | All | Intentional bismuth compound overdose                                               |
| Xa65m | All | Intentional sucralfate overdose                                                     |
| Xa65q | All | Intentional liquorice overdose                                                      |
| Xa65u | All | Intentional misoprostol overdose                                                    |
| Xa65z | All | Intentional cimetidine overdose                                                     |
| Xa663 | All | Intentional famotidine overdose                                                     |
| Xa667 | All | Intentional nizatidine overdose                                                     |

|       |     |                                                |
|-------|-----|------------------------------------------------|
| Xa66B | All | Intentional ranitidine overdose                |
| Xa66D | All | Intentional overdose of H2 antagonist          |
| Xa66I | All | Intentional omeprazole overdose                |
| Xa66M | All | Intentional lansoprazole overdose              |
| Xa66Q | All | Intentional carbenoxolone overdose             |
| Xa66U | All | Intentional pirenzepine overdose               |
| Xa66Y | All | Intentional 5-aminosalicylic acid overdose     |
| Xa66d | All | Intentional aluminium hydroxide overdose       |
| Xa66h | All | Intentional magnesium trisilicate overdose     |
| Xa66l | All | Intentional loperamide overdose                |
| Xa66p | All | Intentional kaolin overdose                    |
| Xa66u | All | Intentional cisapride overdose                 |
| Xa66z | All | Intentional nabilone overdose                  |
| Xa673 | All | Intentional domperidone overdose               |
| Xa677 | All | Intentional metoclopramide overdose            |
| Xa67B | All | Intentional 5-HT3-receptor antagonist overdose |
| Xa67G | All | Intentional bisacodyl overdose                 |
| Xa67K | All | Intentional dantron overdose                   |
| Xa67O | All | Intentional sodium picosulfate overdose        |
| Xa67S | All | Intentional lactulose overdose                 |
| Xa67W | All | Intentional magnesium sulphate overdose        |
| Xa67a | All | Intentional bulk-forming laxative overdose     |
| Xa67e | All | Intentional anthraquinone laxative overdose    |
| Xa67i | All | Intentional cascara overdose                   |
| Xa67m | All | Intentional senna overdose                     |
| Xa67q | All | Intentional docusate overdose                  |
| Xa67v | All | Intentional castor oil overdose                |
| Xa67z | All | Intentional phenolphthalein overdose           |
| Xa684 | All | Intentional dioctyl sulphosuccinate overdose   |
| Xa688 | All | Intentional antispasmodic overdose             |
| Xa68C | All | Intentional bile agent overdose                |
| Xa69o | All | Intentional immunostimulant overdose           |
| Xa69u | All | Intentional mitobronitol overdose              |
| Xa69y | All | Intentional busulfan overdose                  |
| Xa6A2 | All | Intentional treosulfan overdose                |
| Xa6A6 | All | Intentional thiotepa overdose                  |
| Xa6AB | All | Intentional chlorambucil overdose              |
| Xa6AF | All | Intentional cyclophosphamide overdose          |
| Xa6AJ | All | Intentional ethoglucid overdose                |
| Xa6AN | All | Intentional ifosfamide overdose                |
| Xa6AR | All | Intentional melphalan overdose                 |
| Xa6AV | All | Intentional estramustine overdose              |
| Xa6AZ | All | Intentional chlormethine overdose              |
| Xa6Ae | All | Intentional carmustine overdose                |
| Xa6Ai | All | Intentional lomustine overdose                 |

|       |     |                                                  |
|-------|-----|--------------------------------------------------|
| Xa6An | All | Intentional dacarbazine overdose                 |
| Xa6As | All | Intentional dactinomycin overdose                |
| Xa6Aw | All | Intentional bleomycin overdose                   |
| Xa6B0 | All | Intentional mitomycin overdose                   |
| Xa6B4 | All | Intentional plicamycin overdose                  |
| Xa6B8 | All | Intentional aclarubicin overdose                 |
| Xa6BC | All | Intentional mitoxantrone overdose                |
| Xa6BG | All | Intentional doxorubicin overdose                 |
| Xa6BK | All | Intentional epirubicin overdose                  |
| Xa6B0 | All | Intentional idarubicin overdose                  |
| Xa6BT | All | Intentional mercuric oxide overdose              |
| Xa6BX | All | Intentional methotrexate overdose                |
| Xa6Bb | All | Intentional mercaptopurine overdose              |
| Xa6Bf | All | Intentional tioguanine overdose                  |
| Xa6Bj | All | Intentional pentostatin overdose                 |
| Xa6Bn | All | Intentional cytarabine overdose                  |
| Xa6Br | All | Intentional fluorouracil overdose                |
| Xa6Bv | All | Intentional etoposide overdose                   |
| Xa6Bz | All | Intentional amsacrine overdose                   |
| Xa6C3 | All | Intentional carboplatin overdose                 |
| Xa6C7 | All | Intentional cisplatin overdose                   |
| Xa6CB | All | Intentional hydroxycarbamide overdose            |
| Xa6CF | All | Intentional procarbazine overdose                |
| Xa6CJ | All | Intentional razoxane overdose                    |
| Xa6CN | All | Intentional crisantaspase overdose               |
| Xa6CR | All | Intentional paclitaxel overdose                  |
| Xa6CV | All | Intentional fludarabine overdose                 |
| Xa6CZ | All | Intentional aminoglutethimide overdose           |
| Xa6Ce | All | Intentional trilostane overdose                  |
| Xa6Ci | All | Intentional tamoxifen overdose                   |
| Xa6Cm | All | Intentional formestane overdose                  |
| Xa6Cr | All | Intentional vinblastine overdose                 |
| Xa6Cv | All | Intentional vincristine overdose                 |
| Xa6Cz | All | Intentional vindesine overdose                   |
| Xa6D4 | All | Intentional ciclosporin overdose                 |
| Xa6D8 | All | Intentional azathioprine overdose                |
| Xa6DD | All | Intentional central appetite depressant overdose |
| Xa6DI | All | Intentional levodopa overdose                    |
| Xa6DM | All | Intentional amantadine overdose                  |
| Xa6DQ | All | Intentional lisuride overdose                    |
| Xa6DU | All | Intentional bromocriptine overdose               |
| Xa6DZ | All | Intentional lithium overdose                     |
| Xa6Dd | All | Intentional amitriptyline overdose               |
| Xa6Dh | All | Intentional amoxapine overdose                   |
| Xa6DI | All | Intentional butriptyline overdose                |

|       |     |                                                  |
|-------|-----|--------------------------------------------------|
| Xa6Dp | All | Intentional clomipramine overdose                |
| Xa6Dt | All | Intentional desipramine overdose                 |
| Xa6Dx | All | Intentional dosulepin overdose                   |
| Xa6E1 | All | Intentional doxepin overdose                     |
| Xa6E5 | All | Intentional imipramine overdose                  |
| Xa6E9 | All | Intentional iprindole overdose                   |
| Xa6ED | All | Intentional lofepramine overdose                 |
| Xa6EH | All | Intentional nortriptyline overdose               |
| Xa6EL | All | Intentional protriptyline overdose               |
| Xa6EP | All | Intentional trimipramine overdose                |
| Xa6Zp | All | Intentional overdose of tricyclic antidepressant |
| Xa6EU | All | Intentional phenelzine overdose                  |
| Xa6EY | All | Intentional iproniazid overdose                  |
| Xa6Ec | All | Intentional isocarboxazid overdose               |
| Xa6Eg | All | Intentional tranlycypromine overdose             |
| Xa6Ek | All | Intentional moclobemide overdose                 |
| Xa6Eo | All | Intentional tryptophan overdose                  |
| Xa6Es | All | Intentional venlafaxine overdose                 |
| Xa6Ex | All | Intentional sertraline overdose                  |
| Xa6F1 | All | Intentional paroxetine overdose                  |
| Xa6F5 | All | Intentional nefazodone overdose                  |
| Xa6F9 | All | Intentional citalopram overdose                  |
| Xa6FD | All | Intentional fluoxetine overdose                  |
| Xa6FH | All | Intentional fluvoxamine overdose                 |
| Xa6FM | All | Intentional maprotiline overdose                 |
| Xa6FQ | All | Intentional mianserin overdose                   |
| Xa6FU | All | Intentional trazodone overdose                   |
| Xa6FY | All | Intentional viloxazine overdose                  |
| Xa6Fd | All | Intentional beclamide overdose                   |
| Xa6Fh | All | Intentional lamotrigine overdose                 |
| Xa6Fl | All | Intentional piracetam overdose                   |
| Xa6Fp | All | Intentional gabapentin overdose                  |
| Xa6Ft | All | Intentional overdose by sodium valproate         |
| Xa6Fy | All | Intentional methylphenobarbital overdose         |
| Xa6G2 | All | Intentional phenobarbital overdose               |
| Xa6G6 | All | Intentional primidone overdose                   |
| Xa6GA | All | Intentional overdose by carbamazepine            |
| Xa6GE | All | Intentional vigabatrin overdose                  |
| X711g | All | Accidental overdose of phenytoin                 |
| Xa6GL | All | Intentional ethosuximide overdose                |
| Xa6GP | All | Intentional clonazepam overdose                  |
| Xa6GV | All | Intentional zopiclone overdose                   |
| Xa6GZ | All | Intentional zolpidem overdose                    |
| Xa6Gd | All | Intentional chlormezanone overdose               |
| Xa6Gh | All | Intentional methyprylone overdose                |

|       |     |                                              |
|-------|-----|----------------------------------------------|
| Xa6Gl | All | Intentional paraldehyde overdose             |
| Xa6Gq | All | Intentional amobarbital overdose             |
| Xa6Gu | All | Intentional butabarbital overdose            |
| Xa6Gy | All | Intentional cyclobarbitone overdose          |
| Xa6H2 | All | Intentional secobarbital overdose            |
| Xa6H7 | All | Intentional flunitrazepam overdose           |
| Xa6HB | All | Intentional flurazepam overdose              |
| Xa6HF | All | Intentional loprozepam overdose              |
| Xa6HJ | All | Intentional lormetazepam overdose            |
| Xa6HN | All | Intentional nitrazepam overdose              |
| Xa6HR | All | Intentional triazolam overdose               |
| Xa6HV | All | Intentional alprazolam overdose              |
| Xa6HZ | All | Intentional bromazepam overdose              |
| X71Ay | All | Deliberate overdose of chlordiazepoxide      |
| Xa6Hg | All | Intentional clobazam overdose                |
| Xa6Hk | All | Intentional dipotassium clorazepate overdose |
| Xa6Ho | All | Intentional ketazolam overdose               |
| Xa6Hs | All | Intentional medazepam overdose               |
| Xa6Hw | All | Intentional oxazepam overdose                |
| Xa6I0 | All | Intentional prazepam overdose                |
| Xa6I4 | All | Intentional midazolam overdose               |
| X71Ax | All | Deliberate overdose of diazepam              |
| Xa6IB | All | Intentional lorazepam overdose               |
| X71Az | All | Deliberate overdose of temazepam             |
| X71Aw | All | Deliberate overdose of benzodiazepine        |
| Xa6IL | All | Intentional meprobamate overdose             |
| Xa6IQ | All | Intentional chloral hydrate overdose         |
| Xa6IU | All | Intentional dichloralphenazone overdose      |
| Xa6IY | All | Intentional triclofos sodium overdose        |
| Xa6Ic | All | Intentional buspirone overdose               |
| Xa6Ig | All | Intentional clomethiazole overdose           |
| Xa6Il | All | Intentional sulphiride overdose              |
| Xa6Ip | All | Intentional loxapine overdose                |
| Xa6It | All | Intentional clozapine overdose               |
| Xa6Ix | All | Intentional risperidone overdose             |
| Xa6J1 | All | Intentional tetrabenazine overdose           |
| Xa6J6 | All | Intentional benperidol overdose              |
| Xa6JA | All | Intentional trifluperidol overdose           |
| Xa6JE | All | Intentional haloperidol overdose             |
| Xa6JI | All | Intentional droperidol overdose              |
| Xa6JN | All | Intentional pimozide overdose                |
| Xa6JR | All | Intentional fluspirilene overdose            |
| Xa6JW | All | Intentional levomepromazine overdose         |
| Xa6Ja | All | Intentional pericyazine overdose             |
| Xa6Je | All | Intentional fluphenazine decanoate overdose  |



|       |     |                                                       |
|-------|-----|-------------------------------------------------------|
| Xa6Ji | All | Intentional fluphenazine enanthate overdose           |
| Xa6Jm | All | Intentional thiethylperazine overdose                 |
| Xa6Jq | All | Intentional chlorpromazine overdose                   |
| Xa6Ju | All | Intentional pipotiazine overdose                      |
| Xa6Jy | All | Intentional promazine overdose                        |
| Xa6K2 | All | Intentional thioridazine overdose                     |
| Xa6K6 | All | Intentional perphenazine overdose                     |
| Xa6KA | All | Intentional prochlorperazine overdose                 |
| Xa6KE | All | Intentional trifluoperazine overdose                  |
| Xa6KJ | All | Intentional chlorprothixene overdose                  |
| Xa6KN | All | Intentional flupentixol decanoate overdose            |
| Xa6KR | All | Intentional zuclopenthixol decanoate overdose         |
| Xa6KV | All | Intentional zuclopenthixol overdose                   |
| Xa6KZ | All | Intentional flupentixol overdose                      |
| Xa6Kd | All | Intentional oxypertine overdose                       |
| Xa6Kh | All | Intentional remoxipride overdose                      |
| Xa6Kj | All | Intentional overdose of non-barbiturate hypnotic      |
| Xa6Ko | All | Intentional selegiline overdose                       |
| Xa6Kt | All | Intentional amfetamine overdose                       |
| Xa6Ky | All | Intentional antabuse overdose                         |
| Xa6L3 | All | Intentional cannabis overdose                         |
| Xa6L7 | All | Intentional overdose by lysergic acid                 |
| Xa6LB | All | Intentional psilocybin overdose                       |
| Xa6LF | All | Intentional mescaline overdose                        |
| Xa6LJ | All | Intentional overdose of ecstasy                       |
| Xa6LN | All | Intentional overdose by cocaine                       |
| Xa6LR | All | Intentional overdose by crack cocaine                 |
| Xa6LV | All | Intentional caffeine overdose                         |
| Xa6Lb | All | Intentional atenolol overdose                         |
| Xa6Lf | All | Intentional propranolol overdose                      |
| Xa6Lh | All | Intentional overdose of beta-adrenergic blocking drug |
| Xa6Lm | All | Intentional phenoxybenzamine overdose                 |
| Xa6Lq | All | Intentional nicotine overdose                         |
| Xa6Lu | All | Intentional overdose by calcium-channel blockers      |
| Xa6Lz | All | Intentional pilocarpine overdose                      |
| Xa6M3 | All | Intentional acetylcholine overdose                    |
| Xa6M7 | All | Intentional anticholinesterase overdose               |
| Xa6MD | All | Intentional metaraminol overdose                      |
| Xa6MI | All | Intentional salbutamol overdose                       |
| Xa6ML | All | Intentional overdose of isoprenaline                  |
| Xa6MQ | All | Intentional clonidine overdose                        |
| Xa6MV | All | Intentional hyoscine overdose                         |
| Xa6MZ | All | Intentional atropine overdose                         |
| Xa6Me | All | Intentional acetylcysteine overdose                   |
| Xa6Mj | All | Intentional nikethamide overdose                      |



|       |     |                                                  |
|-------|-----|--------------------------------------------------|
| Xa6Mo | All | Intentional chlorphenamine overdose              |
| Xa6Ms | All | Intentional diphenhydramine overdose             |
| Xa6N0 | All | Intentional thonzylamine overdose                |
| Xa6N4 | All | Intentional tripeleennamine overdose             |
| Xa6N8 | All | Intentional hydroxyzine overdose                 |
| Xa6ND | All | Intentional aminophylline overdose               |
| Xa6NH | All | Intentional theophylline overdose                |
| Xa6NL | All | Intentional bronchodilator preparations overdose |
| Xa6NR | All | Intentional dithranol overdose                   |
| Xa6NW | All | Intentional gamolenic acid overdose              |
| Xa6Nb | All | Intentional etretinate overdose                  |
| Xa6Nf | All | Intentional acitretin overdose                   |
| Xa6Nj | All | Intentional tretinoin overdose                   |
| Xa6Nn | All | Intentional isotretinoin overdose                |
| Xa6Nt | All | Intentional allopurinol overdose                 |
| Xa6Nx | All | Intentional colchicine overdose                  |
| Xa6O3 | All | Intentional baclofen overdose                    |
| Xa6O7 | All | Intentional methocarbamol overdose               |
| Xa6OB | All | Intentional gold salt overdose                   |
| Xa6OG | All | Intentional papaverine overdose                  |
| Xa6OL | All | Intentional prostaglandin overdose               |
| Xa6OS | All | Intentional naloxone overdose                    |
| Xa6OW | All | Intentional protamine sulphate overdose          |
| Xa6Oa | All | Intentional alternative medicine overdose        |
| Xa6Oj | All | Intentional flucytosine overdose                 |
| Xa6On | All | Intentional griseofulvin overdose                |
| Xa6Or | All | Intentional amphotericin B overdose              |
| Xa6Ov | All | Intentional nystatin overdose                    |
| Xa6P0 | All | Intentional idoxuridine overdose                 |
| Xa6P5 | All | Intentional pyrimethamine overdose               |
| Xa6P9 | All | Intentional chloroquine overdose                 |
| Xa6PD | All | Intentional primaquine overdose                  |
| Xa6PH | All | Intentional quinine overdose                     |
| Xa6PL | All | Intentional mefloquine overdose                  |
| Xa6PP | All | Intentional proguanil overdose                   |
| Xa6PU | All | Intentional piperazine overdose                  |
| Xa6PY | All | Intentional tiabendazole overdose                |
| Xa6Pe | All | Intentional kanamycin overdose                   |
| Xa6Pi | All | Intentional streptomycin overdose                |
| Xa6Pm | All | Intentional gentamicin overdose                  |
| Xa6Pq | All | Intentional tobramycin overdose                  |
| Xa6Pu | All | Intentional netilmicin overdose                  |
| Xa6Pz | All | Intentional erythromycin overdose                |
| Xa6Q3 | All | Intentional azithromycin overdose                |
| Xa6Q7 | All | Intentional clarithromycin overdose              |

|       |     |                                                |
|-------|-----|------------------------------------------------|
| Xa6QB | All | Intentional sodium fusidate overdose           |
| Xa6QF | All | Intentional spectinomycin overdose             |
| Xa6QJ | All | Intentional vancomycin overdose                |
| Xa6QN | All | Intentional trimethoprim overdose              |
| Xa6QR | All | Intentional nitrofurantoin derivative overdose |
| Xa6QV | All | Intentional fusidic acid overdose              |
| Xa6QZ | All | Intentional 4-quinolones overdose              |
| Xa6Qe | All | Intentional ampicillin overdose                |
| Xa6Qj | All | Intentional cloxacillin overdose               |
| Xa6Qn | All | Intentional carbenicillin overdose             |
| Xa6Qr | All | Intentional flucloxacillin overdose            |
| Xa6Qx | All | Intentional cefadroxil overdose                |
| Xa6R1 | All | Intentional cefalexin overdose                 |
| Xa6R5 | All | Intentional cephalothin overdose               |
| Xa6R9 | All | Intentional cefazolin overdose                 |
| Xa6RD | All | Intentional cefradine overdose                 |
| Xa6RH | All | Intentional latamoxef overdose                 |
| Xa6RM | All | Intentional cefaclor overdose                  |
| Xa6RQ | All | Intentional cefuroxime overdose                |
| Xa6RU | All | Intentional cephamandole overdose              |
| Xa6RZ | All | Intentional cefotaxime overdose                |
| Xa6Rd | All | Intentional ceftazidime overdose               |
| Xa6Rh | All | Intentional ceftizoxime overdose               |
| Xa6Rl | All | Intentional cefixime overdose                  |
| Xa6Rp | All | Intentional cefodizime overdose                |
| Xa6Rt | All | Intentional cefpodoxime overdose               |
| Xa6Rx | All | Intentional ceftriaxone overdose               |
| Xa6SA | All | Intentional cefpirome overdose                 |
| Xa6S1 | All | Intentional ceftibuten overdose                |
| Xa6S5 | All | Intentional cefsulodin overdose                |
| Xa6SG | All | Intentional doxycycline overdose               |
| Xa6SK | All | Intentional minocycline overdose               |
| Xa6SO | All | Intentional oxytetracycline overdose           |
| Xa6SS | All | Intentional tetracycline overdose              |
| Xa6SW | All | Intentional chloramphenicol overdose           |
| Xa6Sa | All | Intentional co-trimoxazole overdose            |
| Xa6Sf | All | Intentional antimony compound overdose         |
| Xa6Sj | All | Intentional hydroxyquinoline overdose          |
| Xa6Sp | All | Intentional rifampin overdose                  |
| Xa6St | All | Intentional isoniazid overdose                 |
| Xa6Sx | All | Intentional ethambutol overdose                |
| Xa6T1 | All | Intentional antileprotic drug overdose         |
| Xa6T5 | All | Intentional pesticide product overdose         |
| Xa6TB | All | Intentional gamma globulin overdose            |
| Xa6TF | All | Intentional vaccine overdose                   |

|       |     |                                                |
|-------|-----|------------------------------------------------|
| Xa6TJ | All | Intentional antisera overdose                  |
| Xa6TO | All | Intentional glucagon overdose                  |
| Xa6TU | All | Intentional carbimazole overdose               |
| Xa6TY | All | Intentional thiouracil overdose                |
| Xa6Td | All | Intentional prednisone overdose                |
| Xa6Th | All | Intentional dexamethasone overdose             |
| Xa6Tl | All | Intentional insulin overdose                   |
| Xa6Tr | All | Intentional acetoexamide overdose              |
| Xa6Tv | All | Intentional chlorpropamide overdose            |
| Xa6Tz | All | Intentional overdose by glibenclamide          |
| Xa6U3 | All | Intentional tolbutamide overdose               |
| Xa6U8 | All | Intentional overdose by metformin              |
| Xa6UD | All | Intentional progestogen overdose               |
| Xa6UI | All | Intentional nandrolone overdose                |
| Xa6UM | All | Intentional oxymetholone overdose              |
| Xa6UQ | All | Intentional methandriol overdose               |
| Xa6UU | All | Intentional oral contraceptive overdose        |
| Xa6UZ | All | Intentional testosterone overdose              |
| Xa6Ud | All | Intentional oestrogen overdose                 |
| Xa6Ui | All | Intentional liothyronine overdose              |
| Xa6Xh | All | Intentional streptokinase overdose             |
| Xa6Xl | All | Intentional urokinase overdose                 |
| Xa6Um | All | Intentional thyroxin overdose                  |
| Xa6Uz | All | Intentional heparin overdose                   |
| Xa6V3 | All | Intentional coumarin overdose                  |
| Xa6V7 | All | Intentional warfarin sodium overdose           |
| Xa6VD | All | Intentional ferrous sulphate overdose          |
| Xa6VI | All | Intentional iodide overdose                    |
| Xa6VN | All | Intentional vitamin A overdose                 |
| Xa6VR | All | Intentional vitamin D overdose                 |
| Xa6VV | All | Intentional vitamin K overdose                 |
| Xa6Va | All | Intentional nicotinic acid derivative overdose |
| Xa6Ve | All | Intentional folic acid overdose                |
| Xa6Vi | All | Intentional potassium overdose                 |
| Xa6Vo | All | Intentional clofibrate overdose                |
| Xa6Vu | All | Intentional disopyramide overdose              |
| Xa6Vy | All | Intentional quinidine overdose                 |
| Xa6W2 | All | Intentional procainamide overdose              |
| Xa6W7 | All | Intentional bretylium overdose                 |
| Xa6WC | All | Intentional amiodarone overdose                |
| Xa6WJ | All | Intentional bendroflumethiazide overdose       |
| Xa6WN | All | Intentional chlorothiazide overdose            |
| Xa6WS | All | Intentional furosemide overdose                |
| Xa6WW | All | Intentional bumetanide overdose                |
| Xa6Wa | All | Intentional etacrynic acid overdose            |

|       |     |                                                                                                                                             |
|-------|-----|---------------------------------------------------------------------------------------------------------------------------------------------|
| Xa6We | All | Intentional potassium sparing diuretic overdose                                                                                             |
| Xa6Wi | All | Intentional osmotic diuretic overdose                                                                                                       |
| Xa6Wn | All | Intentional mersalyl overdose                                                                                                               |
| Xa6Ws | All | Intentional acetazolamide overdose                                                                                                          |
| Xa6Wy | All | Intentional guanethidine overdose                                                                                                           |
| Xa6X2 | All | Intentional overdose by angiotensin-converting-enzyme inhibitors                                                                            |
| Xa6X5 | All | Intentional antihypertensive overdose                                                                                                       |
| Xa6XA | All | Intentional digoxin overdose                                                                                                                |
| Xa6XE | All | Intentional phosphodiesterase inhibitor overdose                                                                                            |
| Xa6XJ | All | Intentional ergot alkaloid overdose                                                                                                         |
| Xa6XO | All | Intentional diazoxide overdose                                                                                                              |
| Xa6XS | All | Intentional hydralazine overdose                                                                                                            |
| Xa6XW | All | Intentional dipyridamole overdose                                                                                                           |
| Xa6Xh | All | Intentional streptokinase overdose                                                                                                          |
| Xa6Xl | All | Intentional urokinase overdose                                                                                                              |
| Xa6Tl | All | Intentional insulin overdose                                                                                                                |
| Xa6TF | All | Intentional vaccine overdose                                                                                                                |
| Xa6TO | All | Intentional glucagon overdose                                                                                                               |
| Xa6Lq | All | Intentional nicotine overdose                                                                                                               |
| Xa6TJ | All | Intentional antisera overdose                                                                                                               |
| U204. | All | [X]Overdose - SSRI                                                                                                                          |
| U2040 | All | [X]Intentional self poisoning by and exposure to psychotropic drugs, occurrence at home                                                     |
| U2041 | All | [X]Intentional self poisoning by and exposure to psychotropic drugs, occurrence in residential institution                                  |
| U2042 | All | [X]Intentional self poisoning by and exposure to psychotropic drugs, occurrence at school, other institution and public administrative area |
| U2043 | All | [X]Intentional self poisoning by and exposure to psychotropic drugs, occurrence at sports and athletics area                                |
| U2044 | All | [X]Intentional self poisoning by and exposure to psychotropic drugs, occurrence on street and highway                                       |
| U2045 | All | [X]Intentional self poisoning by and exposure to psychotropic drugs, occurrence at trade and service area                                   |
| U2046 | All | [X]Intentional self poisoning by and exposure to psychotropic drugs, occurrence at industrial and construction area                         |
| U2047 | All | [X]Intentional self poisoning by and exposure to psychotropic drugs, occurrence on farm                                                     |
| U204y | All | [X]Intentional self poisoning by and exposure to psychotropic drugs, occurrence at other specified place                                    |
| U204z | All | [X]Intentional self poisoning by and exposure to psychotropic drugs, occurrence at unspecified place                                        |
| Xa1Py | All | H/O: repeated overdose                                                                                                                      |
| U2020 | All | [X]Intentional self poisoning by and exposure to sedative hypnotics, occurrence at home                                                     |
| U2021 | All | [X]Intentional self poisoning by and exposure to sedative hypnotics, occurrence in residential institution                                  |

|       |     |                                                                                                                                             |
|-------|-----|---------------------------------------------------------------------------------------------------------------------------------------------|
| U2022 | All | [X]Intentional self poisoning by and exposure to sedative hypnotics, occurrence at school, other institution and public administrative area |
| U2023 | All | [X]Intentional self poisoning by and exposure to sedative hypnotics, occurrence at sports and athletics area                                |
| U2024 | All | [X]Intentional self poisoning by and exposure to sedative hypnotics, occurrence on street and highway                                       |
| U2025 | All | [X]Intentional self poisoning by and exposure to sedative hypnotics, occurrence at trade and service area                                   |
| U2026 | All | [X]Intentional self poisoning by and exposure to sedative hypnotics, occurrence at industrial and construction area                         |
| U2027 | All | [X]Intentional self poisoning by and exposure to sedative hypnotics, occurrence on farm                                                     |
| U202y | All | [X]Intentional self poisoning by and exposure to sedative hypnotics, occurrence at other specified place                                    |
| U202z | All | [X]Intentional self poisoning by and exposure to sedative hypnotics, occurrence at unspecified place                                        |
| Xa67B | All | Intentional 5-HT <sub>3</sub> -receptor antagonist overdose                                                                                 |
| Xa4kL | All | Intentional paracetamol poisoning                                                                                                           |
| Xa4kP | All | Intentional paracetamol and dextropropoxyphene poisoning                                                                                    |
| Xa4kV | All | Intentional aspirin poisoning                                                                                                               |
| Xa4kY | All | Intentional salicylic acid salt poisoning                                                                                                   |
| Xa4kb | All | Intentional pentazocine poisoning                                                                                                           |
| Xa4kf | All | Intentional phenazocine poisoning                                                                                                           |
| Xa4kk | All | Intentional dextromoramide poisoning                                                                                                        |
| Xa4ko | All | Intentional dextropropoxyphene poisoning                                                                                                    |
| Xa4ks | All | Intentional dipipanone poisoning                                                                                                            |
| Xa4kv | All | Intentional methadone poisoning                                                                                                             |
| Xa4l0 | All | Intentional buprenorphine poisoning                                                                                                         |
| Xa4l3 | All | Intentional poisoning by codeine                                                                                                            |
| Xa4l6 | All | Intentional heroin poisoning                                                                                                                |
| Xa4l9 | All | Intentional poisoning by dihydrocodeine                                                                                                     |
| Xa4lD | All | Intentional nalbuphine poisoning                                                                                                            |
| Xa4lG | All | Intentional morphine poisoning                                                                                                              |
| Xa4lM | All | Intentional alfentanil poisoning                                                                                                            |
| Xa4lQ | All | Intentional fentanyl poisoning                                                                                                              |
| Xa4lT | All | Intentional pethidine poisoning                                                                                                             |
| Xa4lX | All | Intentional phenoperidine poisoning                                                                                                         |
| Xa4lb | All | Intentional meptazinol poisoning                                                                                                            |
| Xa4lf | All | Intentional levorphanol poisoning                                                                                                           |
| Xa4li | All | Intentional narcotic poisoning                                                                                                              |
| Xa4lo | All | Intentional poisoning by combination analgesic                                                                                              |
| Xa4ls | All | Intentional acemetacin poisoning                                                                                                            |
| Xa4lw | All | Intentional azapropazone poisoning                                                                                                          |
| Xa4m0 | All | Intentional diclofenac poisoning                                                                                                            |
| Xa4m4 | All | Intentional etodolac poisoning                                                                                                              |
| Xa4m8 | All | Intentional felbinac poisoning                                                                                                              |

|       |     |                                                                 |
|-------|-----|-----------------------------------------------------------------|
| Xa4mC | All | Intentional fenbufen poisoning                                  |
| Xa4mG | All | Intentional fenoprofen poisoning                                |
| Xa4mK | All | Intentional flurbiprofen poisoning                              |
| Xa4mN | All | Intentional ibuprofen poisoning                                 |
| Xa4mQ | All | Intentional indometacin poisoning                               |
| Xa4mU | All | Intentional ketoprofen poisoning                                |
| Xa4mY | All | Intentional ketorolac poisoning                                 |
| Xa4mc | All | Intentional mefenamic acid poisoning                            |
| Xa4mg | All | Intentional nabumetone poisoning                                |
| Xa4mj | All | Intentional naproxen poisoning                                  |
| Xa4mn | All | Intentional nefopam poisoning                                   |
| Xa4mr | All | Intentional oxyphenbutazone poisoning                           |
| Xa4mu | All | Intentional phenylbutazone poisoning                            |
| Xa4my | All | Intentional piroxicam poisoning                                 |
| Xa4n2 | All | Intentional sulindac poisoning                                  |
| Xa4n6 | All | Intentional tenoxicam poisoning                                 |
| Xa4nA | All | Intentional tiaprofenic acid poisoning                          |
| Xa4nE | All | Intentional tolmetin poisoning                                  |
| Xa4nJ | All | Intentional radiopharmaceutical poisoning                       |
| Xa4nR | All | Intentional X-ray contrast media poisoning                      |
| Xa4nV | All | Intentional magnetic resonance imaging contrast media poisoning |
| Xa4nN | All | Intentional X-ray diagnostic contrast media poisoning           |
| Xa4nZ | All | Intentional allergen extract vaccine poisoning                  |
| Xa4nd | All | Intentional diagnostic dye poisoning                            |
| Xa53n | All | Intentional dextromethorphan poisoning                          |
| Xa53q | All | Intentional guaifenesin poisoning                               |
| Xa53t | All | Intentional terpin hydrate poisoning                            |
| Xa53w | All | Intentional poisoning by bronchodilator drug                    |
| Xa53z | All | Intentional aminophylline poisoning                             |
| Xa542 | All | Intentional theophylline poisoning                              |
| Xa545 | All | Intentional poisoning by herbal asthma mixture                  |
| Xa548 | All | Intentional anti-common cold drug poisoning                     |
| Xa54B | All | Intentional local antipruritic poisoning                        |
| Xa54E | All | Intentional local astringent and detergent poisoning            |
| Xa54H | All | Intentional hair treatment poisoning                            |
| Xa54L | All | Intentional allopurinol poisoning                               |
| Xa54O | All | Intentional colchicine poisoning                                |
| Xa54R | All | Intentional probenecid poisoning                                |
| Xa54X | All | Intentional gold salt poisoning                                 |
| Xa54a | All | Intentional antirheumatic poisoning                             |
| Xa54v | All | Intentional chelating agent poisoning                           |
| Xa54z | All | Intentional alternative medicine poisoning                      |
| Xa556 | All | Intentional flucytosine poisoning                               |
| Xa559 | All | Intentional griseofulvin poisoning                              |
| Xa55C | All | Intentional amphotericin B poisoning                            |



|       |     |                                                 |
|-------|-----|-------------------------------------------------|
| Xa55F | All | Intentional nystatin poisoning                  |
| Xa55I | All | Intentional trichomycin poisoning               |
| Xa55L | All | Intentional idoxuridine poisoning               |
| Xa55x | All | Intentional kanamycin poisoning                 |
| Xa560 | All | Intentional streptomycin poisoning              |
| Xa564 | All | Intentional gentamicin poisoning                |
| Xa568 | All | Intentional tobramycin poisoning                |
| Xa56C | All | Intentional netilmicin poisoning                |
| Xa56F | All | Intentional erythromycin poisoning              |
| Xa56J | All | Intentional azithromycin poisoning              |
| Xa56N | All | Intentional clarithromycin poisoning            |
| Xa56Q | All | Intentional oleandomycin poisoning              |
| Xa56T | All | Intentional spiramycin poisoning                |
| Xa56X | All | Intentional sodium fusidate poisoning           |
| Xa56b | All | Intentional spectinomycin poisoning             |
| Xa56f | All | Intentional vancomycin poisoning                |
| Xa56j | All | Intentional trimethoprim poisoning              |
| Xa56m | All | Intentional nitrofurantoin derivative poisoning |
| Xa56q | All | Intentional fusidic acid poisoning              |
| Xa56u | All | Intentional 4-quinolones poisoning              |
| Xa6QZ | All | Intentional 4-quinolones overdose               |
| Xa56x | All | Intentional ampicillin poisoning                |
| Xa570 | All | Intentional cloxacillin poisoning               |
| Xa573 | All | Intentional carbenicillin poisoning             |
| Xa576 | All | Intentional penicillin G poisoning              |
| Xa57A | All | Intentional flucloxacillin poisoning            |
| Xa57E | All | Intentional piperacillin poisoning              |
| Xa57J | All | Intentional cefadroxil poisoning                |
| Xa57M | All | Intentional cefalexin poisoning                 |
| Xa57P | All | Intentional cephalothin poisoning               |
| Xa57T | All | Intentional cefazolin poisoning                 |
| Xa57X | All | Intentional cefradine poisoning                 |
| Xa57b | All | Intentional latamoxef poisoning                 |
| Xa57k | All | Intentional cefuroxime poisoning                |
| Xa57g | All | Intentional cefaclor poisoning                  |
| Xa57o | All | Intentional cephmandole poisoning               |
| Xa57t | All | Intentional cefotaxime poisoning                |
| Xa57x | All | Intentional ceftazidime poisoning               |
| Xa581 | All | Intentional ceftizoxime poisoning               |
| Xa585 | All | Intentional cefixime poisoning                  |
| Xa589 | All | Intentional cefodizime poisoning                |
| Xa58D | All | Intentional cefpodoxime poisoning               |
| Xa58H | All | Intentional ceftriaxone poisoning               |
| Xa58L | All | Intentional ceftibuten poisoning                |
| Xa58P | All | Intentional cefsulodin poisoning                |



|       |     |                                                |
|-------|-----|------------------------------------------------|
| Xa58U | All | Intentional ceftiofime poisoning               |
| Xa58X | All | Intentional cephaloridine poisoning            |
| Xa58a | All | Intentional sulfadiazine poisoning             |
| Xa58d | All | Intentional sulphafurazole poisoning           |
| Xa58g | All | Intentional sulfamethoxazole poisoning         |
| Xa58j | All | Intentional doxycycline poisoning              |
| Xa58m | All | Intentional minocycline poisoning              |
| Xa58p | All | Intentional oxytetracycline poisoning          |
| Xa58s | All | Intentional tetracycline poisoning             |
| Xa58v | All | Intentional chloramphenicol poisoning          |
| Xa58z | All | Intentional co-trimoxazole poisoning           |
| Xa59F | All | Intentional hydroxyquinoline poisoning         |
| Xa59I | All | Intentional diiodohydroxyquinoline poisoning   |
| Xa59L | All | Intentional rifampin poisoning                 |
| Xa59O | All | Intentional isoniazid poisoning                |
| Xa59R | All | Intentional ethambutol poisoning               |
| Xa59U | All | Intentional cycloserine poisoning              |
| Xa59Y | All | Intentional antileprotic drug poisoning        |
| Xa59b | All | Intentional ethionamide poisoning              |
| Xa59e | All | Intentional para-aminosalicylic acid poisoning |
| Xa59h | All | Intentional sulphone poisoning                 |
| Xa59l | All | Intentional pesticide product poisoning        |

**Supplementary table S2.10.** Read codes used to identify non-medication based treatments for depression or anxiety.

| <b>Counselling</b>    |                |                                            |
|-----------------------|----------------|--------------------------------------------|
| <b>Read V2 Code</b>   | <b>Term ID</b> | <b>Description</b>                         |
| 67...                 | 11             | Counselling/health education               |
| 671..                 | All            | Counselling - general                      |
| 6712.                 | All            | Counselling offered                        |
| 6714.                 | All            | Counselling carried out                    |
| 6715.                 | All            | Counselling by other agency                |
| 6716.                 | All            | Counselling of benefit                     |
| 6717.                 | All            | Counselling of no benefit                  |
| 671Z.                 | All            | Counselling - general NOS                  |
| 672..                 | All            | Person counselled                          |
| 6721.                 | All            | Patient counselled                         |
| 6722.                 | All            | Family counselled                          |
| 673..                 | All            | Person counselled by                       |
| 6731.                 | All            | Counselled by a doctor                     |
| 6732.                 | All            | Counselled by a nurse                      |
| 6733.                 | All            | Counselled by a health visitor             |
| 6735.                 | All            | Counselled by a social worker              |
| 6736.                 | All            | Counselled by a counsellor                 |
| 6737.                 | All            | Counselled by a vol. worker                |
| 673Z.                 | All            | Counselled by person NOS                   |
| 8M8..                 | All            | Counselling requested                      |
| 9NJ1.                 | All            | In-house counselling                       |
| 9NJR.                 | All            | In-house counselling first appointment     |
| 9NJT.                 | All            | In-house counselling follow-up appointment |
| <b>Read CTV3 Code</b> | <b>Term ID</b> | <b>Description</b>                         |
| X71Ec                 | All            | Counselling                                |
| X71Ep                 | All            | Coping strategy counselling                |
| XaEC1                 | All            | Phobia counselling                         |
| XaD27                 | All            | Family counselling                         |
| 6779.                 | All            | Psychological counselling                  |
| XaECG                 | All            | Anxiety counselling                        |
| XaECF                 | All            | Self-esteem counselling                    |
| XaI8j                 | All            | Stress counselling                         |
| 672..                 | All            | Person counselled                          |
| 6721.                 | All            | Patient counselled                         |
| 6722.                 | All            | Family counselled                          |
| XE1TI                 | All            | Person counselled by                       |
| 6715.                 | All            | Counselling by other agency                |
| 6731.                 | All            | Counselled by a doctor                     |

|                                      |                |                                                         |
|--------------------------------------|----------------|---------------------------------------------------------|
| 6732.                                | All            | Counselled by a nurse                                   |
| 6733.                                | All            | Counselled by a health visitor                          |
| 6735.                                | All            | Counselled by a social worker                           |
| 6736.                                | All            | Counselled by a counsellor                              |
| 6737.                                | All            | Counselled by voluntary worker                          |
| 673Z.                                | All            | Counselled by person NOS                                |
| Xa07L                                | All            | Counselled by member of primary health care team        |
| 9N2B.                                | All            | Seen by counsellor                                      |
| XaAS4                                | All            | Seen by mental health counsellor                        |
| XaBT1                                | All            | Refer to counsellor                                     |
| XaAfj                                | All            | Referral to mental health counsellor                    |
| 9NJ1.                                | All            | In-house counselling                                    |
| XaLnp                                | All            | In-house counselling first appointment                  |
| XaLnr                                | All            | In-house counselling follow-up appointment              |
| 671..                                | All            | Counselling - general                                   |
| 6712.                                | All            | Counselling offered                                     |
| 6714.                                | All            | Counselling carried out                                 |
| 6716.                                | All            | Counselling of benefit                                  |
| 6717.                                | All            | Counselling of no benefit                               |
| 671Z.                                | All            | Counselling - general NOS                               |
| XaAOd                                | All            | Under care of counsellor                                |
| XaAOh                                | All            | Under care of mental health counsellor                  |
| <b>Cognitive Behavioural Therapy</b> |                |                                                         |
| <b>Read V2 Code</b>                  | <b>Term ID</b> | <b>Description</b>                                      |
| 8G13.                                | All            | Cognitive-behaviour therapy                             |
| 8G130                                | All            | Cognitive behavioural therapy parenting programme       |
| 8G131                                | All            | CBTp - cognitive behavioural therapy for psychosis      |
| 7L1a.                                | All            | Cognitive behavioural therapy                           |
| 7L1a0                                | All            | Cognitive behavioural therapy by unidisciplinary team   |
| 7L1a1                                | All            | Cognitive behavioural therapy by multidisciplinary team |
| 7L1ay                                | All            | Other specified cognitive behavioural therapy           |
| 7L1az                                | All            | Cognitive behavioural therapy NOS                       |
| 8G510                                | All            | Group cognitive behavioural therapy                     |
| 8G15.                                | All            | Computerised cognitive behavioural therapy              |
| 8HLK.                                | All            | Referral for cognitive behavioural therapy              |
| <b>Read CTV3 Code</b>                | <b>Term ID</b> | <b>Description</b>                                      |
| Ub0qp                                | All            | Cognitive and behavioural therapy                       |
| XaABO                                | All            | Cognitive - behaviour therapy                           |
| Xad6j                                | All            | Cognitive behavioural therapy for psychosis             |
| Xaaa6                                | All            | Cognitive behavioural therapy parenting programme       |
| XaQC0                                | All            | Guided self help cognitive behavioural therapy          |
| XaKzQ                                | All            | Computerised cognitive behavioural therapy              |
| Xa8I9                                | All            | Generic cognitive behavioural therapy                   |

|                       |                |                                                                   |
|-----------------------|----------------|-------------------------------------------------------------------|
| XaM2I                 | All            | Cognitive behavioural therapy by unidisciplinary team             |
| XaM2J                 | All            | Cognitive behavioural therapy by multidisciplinary team           |
| XaM2K                 | All            | Other specified cognitive behavioural therapy                     |
| XaM2L                 | All            | Cognitive behavioural therapy NOS                                 |
| XaR2j                 | All            | Referral to cognitive behavioural therapist                       |
| XaR5D                 | All            | Referral for cognitive behavioural therapy                        |
| XaYgB                 | All            | Referral for high intensity cognitive behavioural therapy         |
| <b>Psychotherapy</b>  |                |                                                                   |
| <b>Read V2 Code</b>   | <b>Term ID</b> | <b>Description</b>                                                |
| 8G...                 | All            | Psychotherapy                                                     |
| 8G1..                 | All            | General psychotherapy                                             |
| 8G10.                 | All            | Psychotherapy - behavioural                                       |
| 8G100                 | All            | Behavioural activation therapy                                    |
| 8G101                 | All            | Dialectical behaviour therapy                                     |
| 8G102                 | All            | Behavioural parent training                                       |
| 8G11.                 | All            | Psychotherapy - cognitive                                         |
| 8G12.                 | All            | Psychotherapy - psychodynamic                                     |
| 8G120                 | All            | Short-term psychodynamic therapy                                  |
| 8G121                 | All            | Dynamic interpersonal therapy                                     |
| 8G122                 | All            | Focal psychodynamic therapy                                       |
| 8G14.                 | All            | Cognitive analytic therapy                                        |
| 8G15.                 | All            | Computerised cognitive behavioural therapy                        |
| 8G16.                 | All            | Interpersonal psychotherapy                                       |
| 8G18.                 | All            | Cognitive stimulation therapy                                     |
| 9NIK.                 | All            | Seen by psychotherapist                                           |
| 9NIK0                 | All            | Seen by trainee psychotherapist                                   |
| 8HHT.                 | All            | Referral to psychotherapist                                       |
| ZV57D                 | All            | [V]Psychotherapy, not elsewhere classified                        |
| ZV673                 | All            | [V]Psychotherapy or other treatment for mental disorder follow-up |
| 8G9Z.                 | All            | Other psychotherapy NOS                                           |
| 8G9..                 | All            | Other psychotherapy                                               |
| <b>Read CTV3 Code</b> | <b>Term ID</b> | <b>Description</b>                                                |
| X71bp                 | All            | Psychotherapy                                                     |
| XaaUO                 | All            | Cognitive rehabilitation therapy                                  |
| XaItc                 | All            | Brief solution focused psychotherapy                              |
| Xa8IG                 | All            | Psychoanalytic and psychodynamic therapy                          |
| Xa8IJ                 | All            | Long-term exploratory psychotherapy                               |
| 3841.                 | All            | Psychoanalysis                                                    |
| XaA8V                 | All            | Generic psychoanalysis                                            |
| XaA8W                 | All            | Independent psychoanalysis                                        |
| XaA8T                 | All            | Kleinian psychoanalysis                                           |
| XaA8U                 | All            | Bion-based group psychoanalysis                                   |
| XaA8X                 | All            | Classical psychoanalysis                                          |

|       |     |                                                   |
|-------|-----|---------------------------------------------------|
| XaA8Y | All | Lacanian psychoanalysis                           |
| XaA8g | All | Group psychoanalysis                              |
| XaA8U | All | Bion-based group psychoanalysis                   |
| 384Z. | All | Psychological analysis NOS                        |
| Xa8IM | All | Jungian-based therapy                             |
| Xa8IN | All | Generic Jungian-based therapy                     |
| Xa8IP | All | Analytical psychology                             |
| Xa8IR | All | Long-term psychodynamic psychotherapy             |
| XaA8Z | All | Developmental psychodynamic psychotherapy         |
| XaA8c | All | Supportive expressive psychodynamic psychotherapy |
| XaA8d | All | Psychodynamic-interpersonal psychotherapy         |
| XaEVq | All | Psychodynamic psychotherapy                       |
| Xad7C | All | Focal psychodynamic therapy                       |
| Xa8IR | All | Long-term psychodynamic psychotherapy             |
| XaA8Z | All | Developmental psychodynamic psychotherapy         |
| XaA8c | All | Supportive expressive psychodynamic psychotherapy |
| XaA8d | All | Psychodynamic-interpersonal psychotherapy         |
| Xa8II | All | Short-term psychodynamic therapy                  |
| XaXuc | All | Dynamic interpersonal therapy                     |
| XaA9g | All | Specific task orientated psychotherapy            |
| XE0iL | All | Psychotherapy/sociotherapy                        |
| 8G9Z. | All | Other psychotherapy NOS                           |
| 8G9.. | All | Other psychotherapy                               |

## Codes used to identify time off work and unemployment

**Supplementary table S3.1.** Read codes used to identify unemployment.

| Unemployment   |         |                                                                       |
|----------------|---------|-----------------------------------------------------------------------|
| Read V2 Code   | Term ID | Description                                                           |
| 13J7.          | All     | Unemployed                                                            |
| 13J70          | All     | Recently unemployed                                                   |
| 13J71          | All     | Chronic unemployment                                                  |
| ZV620          | All     | [V]Unemployment                                                       |
| 13R..          | All     | Unemployment benefits                                                 |
| 13R1.          | All     | Unemployment benefits                                                 |
| 13R2.          | All     | Redundancy payment                                                    |
| 13RZ.          | All     | Unemployment benefit NOS                                              |
| 13JX.          | All     | Time off work                                                         |
| 13JG.          | All     | Voluntarily redundant                                                 |
| 13J3.          | All     | Loss of job                                                           |
| 13J30          | All     | Sacked from work                                                      |
| 13J8.          | All     | Redundant                                                             |
| 13JJ.          | All     | Unfit for work                                                        |
| 13JJ0          | All     | Benefit agency reports unfit for work                                 |
| 13JJ1          | All     | Benefit agency reports unfit for work but fit note no longer required |
| 13Jk.          | All     | Not in employment, education or training                              |
| 9DG4.          | All     | IB 113 DLS incapacity for work form paid                              |
| 9DG2.          | All     | IB 113 DLS incapacity for work form sent                              |
| 9DG3.          | All     | IB 113 DLS incapacity for work form received                          |
| 9DG1.          | All     | IB 113 DLS incapacity for work form completed                         |
| 9DQ3.          | All     | ESA113 form paid                                                      |
| 9DQ1.          | All     | ESA113 form sent                                                      |
| 9DQ2.          | All     | ESA113 form received                                                  |
| 9DQ0.          | All     | ESA113 form completed                                                 |
| 130D.          | All     | Employment and support allowance                                      |
| Read CTV3 Code | Term ID | Description                                                           |
| 13J7.          | All     | Unemployed                                                            |
| 13J70          | All     | Recently unemployed                                                   |
| 13J71          | All     | Chronic unemployment                                                  |
| ZV620          | All     | [V]Unemployment                                                       |
| XaPhf          | All     | Benefit agency reports unfit for work                                 |
| Xabd4          | All     | Benefit agency reports unfit for work but fit note no longer required |
| 13J8.          | All     | Redundant                                                             |
| 13JG.          | All     | Voluntarily redundant                                                 |

|       |     |                                               |
|-------|-----|-----------------------------------------------|
| Ua2BD | All | Unfit to return to work                       |
| Ua2BE | All | Physically unfit for work                     |
| U12BF | All | Mentally unfit for work                       |
| 13JX. | All | Time off work                                 |
| XaZHu | All | ESA113 form paid                              |
| XaZHt | All | ESA113 form sent                              |
| XaZHs | All | ESA113 form received                          |
| XaZHj | All | ESA113 form completed                         |
| XaBhC | All | Employment and support allowance              |
| XacJr | All | Not in employment, education or training      |
| XE0pT | All | Loss of job                                   |
| Ua0V9 | All | Dismissed from job                            |
| Ua0VA | All | Unfair dismissal from job                     |
| XaCIW | All | IB 113 DLS incapacity for work form paid      |
| XaCIU | All | IB 113 DLS incapacity for work form sent      |
| XaCIV | All | IB 113 DLS incapacity for work form received  |
| XaCIT | All | IB 113 DLS incapacity for work form completed |
| 13JJ. | All | Unfit for work                                |
| 13J6. | All | Medically retired                             |



**Supplementary table S3.2.** Read codes used to identify time off work via the issuing of Med 3 (“fit notes”) certificates.

| <b>Unemployment</b>   |                |                                                      |
|-----------------------|----------------|------------------------------------------------------|
| <b>Read V2 Code</b>   | <b>Term ID</b> | <b>Description</b>                                   |
| 9D1..                 | All            | MED3 - doctor's statement                            |
| 9D11.                 | All            | MED3 issued to patient                               |
| 9D12.                 | All            | MED3 duplicate issued                                |
| 9D15.                 | All            | eMED3 (2010) new statement issued, not fit for work  |
| 9D17.                 | All            | eMED3 (2010) duplicate issued, not fit for work      |
| 9D19.                 | All            | MED3 (2010) issued by hand, not fit for work         |
| 9D1C.                 | All            | MED3 (2010) issued to patient                        |
| 9D1D.                 | All            | MED3 (2010) duplicate issued                         |
| 9D1E.                 | All            | MED3 (2010) issued - recommend phased return to work |
| 9D1F.                 | All            | MED3 (2010) issued - recommend altered hours         |
| 9D1G.                 | All            | MED3 (2010) issued - recommend amended duties        |
| 9D1Z.                 | All            | MED3 - NOS                                           |
| <b>Read CTV3 Code</b> | <b>Term ID</b> | <b>Description</b>                                   |
| XaBHd                 | All            | MED3 status                                          |
| XaXf2                 | All            | MED3 (2010) duplicate issued                         |
| XaXf1                 | All            | MED3 (2010) issued to patient                        |
| XaXf5                 | All            | MED3 (2010) issued - recommend amended duties        |
| XaXf4                 | All            | MED3 (2010) issued - recommend altered hours         |
| XaXf3                 | All            | MED3 (2010) issued - recommend phased return to work |
| 9D11.                 | All            | MED3 issued to patient                               |
| XaX1R                 | All            | MED3 (2010) issued by hand, not fit for work         |
| XaX1L                 | All            | eMED3 (2010) duplicate issued, not fit for work      |
| XaX1E                 | All            | eMED3 (2010) new statement issued, not fit for work  |
| 9D12.                 | All            | MED3 duplicate issued                                |
| 9D1Z.                 | All            | MED3 - NOS                                           |

## Definitions of atopic and autoimmune conditions with Read code lists.

**Supplementary table S4.1.** The case definitions for included atopic and autoimmune conditions.

| Condition                          | Definition                                                                                                                                                                                                                                |
|------------------------------------|-------------------------------------------------------------------------------------------------------------------------------------------------------------------------------------------------------------------------------------------|
| <b>Atopic conditions</b>           |                                                                                                                                                                                                                                           |
| Atopic dermatitis                  | Defined using the validated algorithm by Abuabara et al. (2017)(1)                                                                                                                                                                        |
| Allergic rhinitis                  | A diagnosis code for allergic rhinitis (Supplementary table S4.2)                                                                                                                                                                         |
| Asthma                             | Defined using the RCGP RSC asthma algorithm(2)                                                                                                                                                                                            |
| <b>Gastrointestinal conditions</b> |                                                                                                                                                                                                                                           |
| Crohn's disease                    | A diagnosis code for Crohn's and no conflicting code for ulcerative colitis (where conflicted codes occur the most recent diagnosis code is used to define the condition) (Supplementary table S4.3)                                      |
| Ulcerative colitis                 | A diagnosis code for ulcerative colitis and no conflicting code for Crohn's disease (where conflicted codes occur the most recent diagnosis code is used to define the condition) (Supplementary table S4.4)                              |
| Coeliac disease                    | A diagnosis code for Coeliac disease (Supplementary table S4.5)                                                                                                                                                                           |
| Pernicious anaemia                 | A diagnosis code for pernicious anaemia (Supplementary table S4.6)                                                                                                                                                                        |
| <b>Endocrine conditions</b>        |                                                                                                                                                                                                                                           |
| Type 1 diabetes                    | Defined using the RCGP RSC diabetes type algorithm(3)                                                                                                                                                                                     |
| Hashimoto's thyroiditis            | Either: <ul style="list-style-type: none"> <li>• A code for Hashimoto's thyroiditis (Supplementary table S4.7)</li> <li>OR</li> <li>• A code for "non-specific hypothyroidism" AND no code for "non-autoimmune hypothyroidism"</li> </ul> |
| Grave's disease                    | A diagnosis code for Grave's disease (Supplementary table S4.8)                                                                                                                                                                           |
| <b>Rheumatological conditions</b>  |                                                                                                                                                                                                                                           |
| Rheumatoid arthritis               | Defined using the validated algorithm by Muller et al. (2015)(4)                                                                                                                                                                          |
| Psoriatic arthritis                | A diagnosis code for psoriatic arthritis (Supplementary table S4.9)                                                                                                                                                                       |
| Ankylosing spondylitis             | A diagnosis code for ankylosing spondylitis (Supplementary table S4.10)                                                                                                                                                                   |
| Systemic lupus erythematosus       | A diagnosis code for systemic lupus erythematosus (Supplementary table S4.11)                                                                                                                                                             |
| Polymyalgia rheumatica             | A diagnosis code for polymyalgia rheumatica (Supplementary table S4.12)                                                                                                                                                                   |
| Sjögren's syndrome                 | A diagnosis code for Sjögren's syndrome (Supplementary table S4.13)                                                                                                                                                                       |
| <b>Dermatological conditions</b>   |                                                                                                                                                                                                                                           |
| Psoriasis                          | A diagnosis code for psoriasis (Supplementary table S4.14)                                                                                                                                                                                |
| Vitiligo                           | A diagnosis code for vitiligo (Supplementary table S4.15)                                                                                                                                                                                 |

**Neurological conditions**

|                    |                                                                     |
|--------------------|---------------------------------------------------------------------|
| Multiple sclerosis | A diagnosis code for multiple sclerosis (Supplementary table S4.16) |
|--------------------|---------------------------------------------------------------------|

For peer review only

**Supplementary table S4.2.** Read codes used to identify allergic rhinitis.

| <b>Allergic rhinitis</b> |                |                                                     |
|--------------------------|----------------|-----------------------------------------------------|
| <b>Read V2 Code</b>      | <b>Term ID</b> | <b>Description</b>                                  |
| H17..                    | All            | Allergic rhinitis                                   |
| H170.                    | All            | Allergic rhinitis due to pollens                    |
| H171.                    | All            | Allergic rhinitis due to other allergens            |
| H1710                    | All            | Allergy to animal                                   |
| H1711                    | All            | Dog allergy                                         |
| H172.                    | All            | Allergic rhinitis due to unspecified allergen       |
| H17z.                    | All            | Allergic rhinitis NOS                               |
| 14B1.                    | All            | H/O: hay fever                                      |
| H3300                    | All            | Hay fever with asthma                               |
| <b>Read CTV3 Code</b>    | <b>Term ID</b> | <b>Description</b>                                  |
| XE0Y5                    | All            | Allergic rhinitis                                   |
| Xa0IX                    | All            | Seasonal allergic rhinitis                          |
| XE2QI                    | All            | Allergic rhinitis due to pollens                    |
| Hyu20                    | All            | [X]Other seasonal allergic rhinitis                 |
| X00I8                    | All            | Hay fever - other allergen                          |
| X00I9                    | All            | Hay fever - unspecified allergen                    |
| X1020                    | All            | Hay fever with asthma                               |
| X00IA                    | All            | Perennial allergic rhinitis                         |
| X00IB                    | All            | Perennial allergic rhinitis with seasonal variation |
| H17z.                    | All            | Allergic rhinitis NOS                               |
| Hyu21                    | All            | [X]Other allergic rhinitis                          |
| XE0Y6                    | All            | Allergic rhinitis due to other allergens            |
| XE0Y7                    | All            | Allergic rhinitis due to unspecified allergen       |
| 14B1.                    | All            | H/O: hay fever                                      |

Supplementary table S4.3. Read codes used to Crohn's disease.

| Crohn's disease |         |                                                    |
|-----------------|---------|----------------------------------------------------|
| Read V2 Code    | Term ID | Description                                        |
| J40..           | All     | Regional enteritis- Crohn's disease                |
| J400.           | All     | Regional enteritis of the small bowel              |
| J4000           | All     | Regional enteritis of the duodenum                 |
| J4001           | All     | Regional enteritis of the jejunum                  |
| J4002           | All     | Crohn's disease of the terminal ileum              |
| J4003           | All     | Crohn's disease of the ileum unspecified           |
| J4004           | All     | Crohn's disease of the ileum NOS                   |
| J4005           | All     | Exacerbation of Crohn's disease of small intestine |
| J400z           | All     | Crohn's disease of the small bowel NOS             |
| J40..           | All     | Crohn's disease                                    |
| J4010           | All     | Regional enteritis of the colon                    |
| J4011           | All     | Regional enteritis of the rectum                   |
| J4012           | All     | Exacerbation of Crohn's disease of large intestine |
| J401z           | All     | Crohn's disease of the large bowel NOS             |
| J40z.           | All     | Crohn's disease NOS                                |
| Read CTV3 Code  | Term ID | Description                                        |
| XE2QL           | All     | Crohn's disease                                    |
| Xa0lh           | All     | Regional enteritis                                 |
| X302r           | All     | Crohn's jejunitis                                  |
| X302t           | All     | Crohn's ileitis                                    |
| J4003           | All     | Crohn's disease of the ileum unspecified           |
| J4004           | All     | Crohn's disease of the ileum NOS                   |
| J4002           | All     | Crohn's disease of terminal ileum                  |
| J400.           | All     | Regional enteritis of small bowel                  |
| XaK6C           | All     | Exacerbation of Crohn's disease of small intestine |
| J400z           | All     | Crohn's disease of the small bowel NOS             |
| J401.           | All     | Regional enteritis of the large bowel              |
| XE0af           | All     | Crohn's disease of the large bowel NOS             |
| XaK6D           | All     | Exacerbation of Crohn's disease of large intestine |
| J40z.           | All     | Regional enteritis NOS                             |
| J4010           | All     | Crohn's colitis                                    |
| J4011           | All     | Crohn's proctitis                                  |
| X3050           | All     | Perianal Crohn's disease                           |
| Jyu40           | All     | [X]Other Crohn's disease                           |
| J4001           | Y30Fy   | Regional enteritis of the jejunum                  |

**Supplementary table S4.4.** Read codes used to identify Ulcerative colitis.

| <b>Ulcerative colitis</b> |                |                                          |
|---------------------------|----------------|------------------------------------------|
| <b>Read V2 Code</b>       | <b>Term ID</b> | <b>Description</b>                       |
| J41..                     | All            | Ulcerative colitis and/or proctitis      |
| J410.                     | All            | Ulcerative proctocolitis                 |
| J4100                     | All            | Ulcerative ileocolitis                   |
| J4101                     | All            | Ulcerative colitis                       |
| J4102                     | All            | Ulcerative rectosigmoiditis              |
| J4103                     | All            | Ulcerative proctitis                     |
| J4104                     | All            | Exacerbation of ulcerative colitis       |
| J410z                     | All            | Ulcerative proctocolitis NOS             |
| J411.                     | All            | Ulcerative (chronic) enterocolitis       |
| J412.                     | All            | Ulcerative (chronic) ileocolitis         |
| J413.                     | All            | Ulcerative pancolitis                    |
| N0454                     | All            | Juvenile arthritis in ulcerative colitis |
| N0310                     | All            | Arthropathy in ulcerative colitis        |
| <b>Read CTV3 Code</b>     | <b>Term ID</b> | <b>Description</b>                       |
| XE0ag                     | All            | Ulcerative colitis                       |
| XaZ2j                     | All            | Left sided ulcerative colitis            |
| XaYzX                     | All            | Ulcerative pancolitis                    |
| XaK6E                     | All            | Exacerbation of ulcerative colitis       |
| J410.                     | All            | Ulcerative proctocolitis                 |
| J4100                     | All            | Ulcerative ileocolitis                   |
| J410z                     | All            | Ulcerative proctocolitis NOS             |
| Jyu41                     | All            | [X]Other ulcerative colitis              |
| J4103                     | Y30D7          | Ulcerative proctitis                     |

Supplementary table S4.5. Read codes used to identify Coeliac disease.

| <b>Coeliac disease</b>    |                |                                               |
|---------------------------|----------------|-----------------------------------------------|
| <b>Read V2 Code</b>       | <b>Term ID</b> | <b>Description</b>                            |
| J690.                     | All            | Coeliac disease                               |
| J6900                     | All            | Congenital coeliac disease                    |
| J6901                     | All            | Acquired coeliac disease                      |
| J690z                     | All            | Coeliac disease NOS                           |
| 6648.                     | All            | Coeliac disease monitoring                    |
| 66480                     | All            | Coeliac disease annual review                 |
| 68W4.                     | All            | Coeliac disease autoantibody profile positive |
| <b>Read CTV3 Code</b>     | <b>Term ID</b> | <b>Description</b>                            |
| XE0bL                     | All            | Childhood coeliac disease                     |
| X3037                     | All            | Adult coeliac disease                         |
| J6901                     | All            | Acquired coeliac disease                      |
| J690z                     | All            | Coeliac disease NOS                           |
| XE0bK                     | All            | Coeliac disease                               |
| XaQIX                     | All            | Coeliac disease autoantibody profile positive |
| XaXGl                     | All            | Coeliac disease monitoring                    |
| J6900                     | All            | Congenital coeliac disease                    |
| <b>Pernicious anaemia</b> |                |                                               |
| <b>Read V2 Code</b>       | <b>Term ID</b> | <b>Description</b>                            |
| D010.                     | All            | Pernicious anaemia                            |
| F3815                     | All            | Myasthenic syndrome due to pernicious anaemia |
| <b>Read CTV3 Code</b>     | <b>Term ID</b> | <b>Description</b>                            |
| XE2ro                     | All            | Pernicious anaemia                            |
| X20CE                     | All            | Selective malabsorption of cyanocobalamin     |
| X20CC                     | All            | Congenital deficiency of intrinsic factor     |
| X20CD                     | All            | Biermer's congenital pernicious anaemia       |
| F3815                     | All            | Myasthenic syndrome due to pernicious anaemia |



**Supplementary table S4.6.** Read codes used to identify pernicious anaemia.

| <b>Pernicious anaemia</b> |                |                                               |
|---------------------------|----------------|-----------------------------------------------|
| <b>Read V2 Code</b>       | <b>Term ID</b> | <b>Description</b>                            |
| D010.                     | All            | Pernicious anaemia                            |
| F3815                     | All            | Myasthenic syndrome due to pernicious anaemia |
| <b>Read CTV3 Code</b>     | <b>Term ID</b> | <b>Description</b>                            |
| XE2ro                     | All            | Pernicious anaemia                            |
| X20CE                     | All            | Selective malabsorption of cyanocobalamin     |
| X20CC                     | All            | Congenital deficiency of intrinsic factor     |
| X20CD                     | All            | Biermer's congenital pernicious anaemia       |
| F3815                     | All            | Myasthenic syndrome due to pernicious anaemia |

**Supplementary table S4.7.** Read codes used to identify Hashimoto's thyroiditis.

This will be defined as either a code for Hashimoto's thyroiditis or a non-specific code for hypothyroidism and no codes for any non-autoimmune hypothyroidism.

| <b>Hashimoto's thyroiditis</b>     |                |                                                      |
|------------------------------------|----------------|------------------------------------------------------|
| <b>Read V2 Code</b>                | <b>Term ID</b> | <b>Description</b>                                   |
| C052.                              | All            | Hashimoto's disease                                  |
| C05y4                              | All            | Chronic thyroiditis with transient thyrotoxicosis    |
| C046.                              | All            | Autoimmune myxoedema                                 |
| L1815                              | All            | Postpartum thyroiditis                               |
| <b>Read CTV3 Code</b>              | <b>Term ID</b> | <b>Description</b>                                   |
| X40G1                              | All            | Thyrotoxicosis due to Hashimoto's thyroiditis        |
| X40Gm                              | All            | Hashitoxicosis - transient                           |
| X40Ha                              | All            | Struma lymphomatosis                                 |
| X40HE                              | All            | Autoimmune hypothyroidism                            |
| X40HF                              | All            | Hypothyroidism due to Hashimoto's thyroiditis        |
| X40HG                              | All            | Hypothyroidism due to TSH receptor blocking antibody |
| X40HW                              | All            | Hashimoto's disease                                  |
| X40HY                              | All            | Lymphadenoid goitre                                  |
| X40HZ                              | All            | Lymphocytic thyroiditis - autoimmune                 |
| XE10C                              | All            | Autoimmune thyroiditis                               |
| X40HW                              | All            | Hashimoto's thyroiditis                              |
| X40Gm                              | All            | Hashitoxicosis - transient                           |
| X40HY                              | All            | Lymphadenoid goitre                                  |
| X40HZ                              | All            | Lymphocytic thyroiditis - autoimmune                 |
| X40Ha                              | All            | Struma lymphomatosis                                 |
| X40Dj                              | All            | Postpartum thyroiditis                               |
| <b>Non-specific hypothyroidism</b> |                |                                                      |
| <b>Read V2 Code</b>                | <b>Term ID</b> | <b>Description</b>                                   |
| C04..                              | All            | Acquired hypothyroidism                              |
| C045.                              | All            | Acquired atrophy of thyroid                          |
| C046.                              | All            | Autoimmune myxoedema                                 |
| C04y.                              | All            | Other acquired hypothyroidism                        |
| C04z.                              | All            | Hypothyroidism NOS                                   |
| C04z0                              | All            | Premature puberty due to hypothyroidism              |
| C04z1                              | All            | Myxoedema coma                                       |
| C05y.                              | All            | Other and unspecified chronic thyroiditis            |
| F3953                              | All            | Myopathy due to myxoedema                            |
| F1441                              | All            | Cerebellar ataxia due to myxoedema                   |
| F11x5                              | All            | Cerebral degeneration due to myxoedema               |
| 1432                               | All            | H/O: hypothyroidism                                  |
| 66BB.                              | All            | Hypothyroidism annual review                         |

|                                      |                |                                                           |
|--------------------------------------|----------------|-----------------------------------------------------------|
| 90j..                                | All            | Hypothyroidism monitoring administration                  |
| 90j0.                                | All            | Hypothyroidism monitoring first letter                    |
| 90j1.                                | All            | Hypothyroidism monitoring second letter                   |
| 90j2.                                | All            | Hypothyroidism monitoring third letter                    |
| 90j3.                                | All            | Hypothyroidism monitoring verbal invite                   |
| 90j4.                                | All            | Hypothyroidism monitoring telephone invitation            |
| F3814                                | All            | Myasthenic syndrome due to hypothyroidism                 |
| 90j4.                                | All            | Hypothyroidism monitoring telephone invitation            |
| <b>Read CTV3 Code</b>                | <b>Term ID</b> | <b>Description</b>                                        |
| X40IQ                                | All            | Hypothyroid                                               |
| XE108                                | All            | Acquired hypothyroidism                                   |
| X40HI                                | All            | Compensated hypothyroidism                                |
| X005I                                | All            | Myxoedema coma                                            |
| C04y.                                | All            | Other acquired hypothyroidism                             |
| X40HD                                | All            | Hypothyroid goitre, acquired                              |
| XE10A                                | All            | Hypothyroidism NOS                                        |
| Xa3ed                                | All            | Acquired hypothyroidism NOS                               |
| XaLUg                                | All            | Hypothyroidism review                                     |
| XaOjl                                | All            | Hypothyroidism annual review                              |
| X40HD                                | All            | Hypothyroid goitre, acquired                              |
| XaJul                                | All            | Hypothyroidism monitoring invitation                      |
| XaMFm                                | All            | Hypothyroidism monitoring telephone invitation            |
| XaKbz                                | All            | Hypothyroidism monitoring verbal invite                   |
| XaJuO                                | All            | Hypothyroidism monitoring third letter                    |
| XaJuN                                | All            | Hypothyroidism monitoring second letter                   |
| XaJuM                                | All            | Hypothyroidism monitoring first letter                    |
| C06y1                                | All            | Thyroid atrophy                                           |
| X40I1                                | All            | Atrophy of thyroid - acquired                             |
| F3953                                | All            | Myxoedema myopathy                                        |
| F11x5                                | All            | Myxoedema encephalopathy                                  |
| F1441                                | All            | Myxoedema cerebellar degeneration                         |
| PK251                                | All            | Aplasia of thyroid with myxoedema                         |
| X00Ao                                | All            | Myxoedema neuropathy                                      |
| 1432.                                | All            | H/O: hypothyroidism                                       |
| C04z0                                | All            | Premature puberty due to hypothyroidism                   |
| C05y.                                | All            | Other and unspecified chronic thyroiditis                 |
| <b>Non-autoimmune hypothyroidism</b> |                |                                                           |
| <b>Read V2 Code</b>                  | <b>Term ID</b> | <b>Description</b>                                        |
| C0A..                                | All            | Congenital iodine deficiency syndrome                     |
| C0A0.                                | All            | Congenital iodine-deficiency syndrome, neurological type  |
| C0A1.                                | All            | Congenital iodine-deficiency syndrome, myxoedematous type |
| C0A2.                                | All            | Congenital iodine-deficiency syndrome, mixed type         |
| C0A3.                                | All            | Iodine-deficiency-related diffuse (endemic) goitre        |

|                       |                |                                                            |
|-----------------------|----------------|------------------------------------------------------------|
| C0A4.                 | All            | Iodine-deficiency-related multinodular (endemic) goitre    |
| C0A5.                 | All            | Subclinical iodine-deficiency hypothyroidism               |
| C0AX.                 | All            | Iodine-deficiency-related (endemic) goitre, unspecified    |
| C03..                 | All            | Congenital hypothyroidism                                  |
| C030.                 | All            | Pendred's syndrome                                         |
| C031.                 | All            | Goitrous cretin                                            |
| C03y.                 | All            | Other specified congenital hypothyroidism                  |
| C03y0                 | All            | Congenital hypothyroidism with diffuse goitre              |
| C03y1                 | All            | Congenital hypothyroidism without goitre                   |
| C03z.                 | All            | Congenital hypothyroidism NOS                              |
| C040.                 | All            | Postsurgical hypothyroidism                                |
| C041.                 | All            | Other postablative hypothyroidism                          |
| C0410                 | All            | Irradiation hypothyroidism                                 |
| C041z                 | All            | Postablative hypothyroidism NOS                            |
| C042.                 | All            | Iodine hypothyroidism                                      |
| C043.                 | All            | Other iatrogenic hypothyroidism                            |
| C0430                 | All            | Hypothyroidism resulting from para-aminosalicylic acid     |
| C0431                 | All            | Hypothyroidism resulting from phenylbutazone               |
| C0432                 | All            | Hypothyroidism resulting from resorcinol                   |
| C043z                 | All            | Iatrogenic hypothyroidism NOS                              |
| C044.                 | All            | Postinfectious hypothyroidism                              |
| 71100                 | All            | Total thyroidectomy                                        |
| 71101                 | All            | Subtotal thyroidectomy                                     |
| 5A11.                 | All            | Thyroid gland ablat - irradiat                             |
| 5A12.                 | All            | Thyroid tumour/metast irradiat                             |
| C1343                 | All            | TSH - thyroid-stimulating hormone deficiency               |
| Q4337                 | All            | Neonatal jaunduce with congenital hypothyroidism           |
| <b>Read CTV3 Code</b> | <b>Term ID</b> | <b>Description</b>                                         |
| C03..                 | All            | Congenital hypothyroidism                                  |
| Xa017                 | All            | Congenital hypothyroidism with diffuse goitre              |
| X40H8                 | All            | Congenital hypothyroidism without goitre                   |
| PK251                 | All            | Congenital thyroid aplasia                                 |
| X40HA                 | All            | Congenital thyroid hypoplasia                              |
| X40HB                 | All            | Congenital atrophy of thyroid                              |
| X40HC                 | All            | Congenital hypothyroidism with ectopic thyroid             |
| C03y.                 | All            | Other specified congenital hypothyroidism                  |
| XE107                 | All            | Congenital hypothyroidism NOS                              |
| X40I7                 | All            | Congenital iodine deficiency hypothyroidism                |
| X40I8                 | All            | Congenital iodine deficiency syndrome - myxoedematous type |
| X40I9                 | All            | Congenital iodine deficiency syndrome - mixed type         |
| X40HL                 | All            | Iatrogenic hypothyroidism                                  |
| X40HM                 | All            | Postablative hypothyroidism                                |
| XE109                 | All            | Post-surgical hypothyroidism                               |
| C0410                 | All            | Irradiation hypothyroidism                                 |

|       |     |                                                            |
|-------|-----|------------------------------------------------------------|
| X40HN | All | Radioactive iodine-induced hypothyroidism                  |
| C041. | All | Other postablative hypothyroidism                          |
| C041z | All | Postablative hypothyroidism NOS                            |
| C043. | All | Other iatrogenic hypothyroidism                            |
| C043z | All | Iatrogenic hypothyroidism NOS                              |
| X40HO | All | Drug-induced hypothyroidism                                |
| C0430 | All | Hypothyroidism resulting from para-aminosalicylic acid     |
| C0431 | All | Hypothyroidism resulting from phenylbutazone               |
| C0432 | All | Hypothyroidism resulting from resorcinol                   |
| X40HP | All | Post-infectious hypothyroidism                             |
| X40IB | All | Subclinical iodine deficiency hypothyroidism               |
| C042. | All | Iodine hypothyroidism                                      |
| C1343 | All | TSH deficiency                                             |
| X40LB | All | Isolated TSH deficiency                                    |
| X40LC | All | Idiopathic TSH deficiency                                  |
| X40Hv | All | Hypothyroidism due to iodide trapping defect               |
| X40Hw | All | Hypothyroidism due to iodide organification defect         |
| X40Hx | All | Hypothyroidism due to coupling defect                      |
| X40Hy | All | Hypothyroidism due to deiodase defect                      |
| X40Hz | All | Hypothyroidism due to thyroglobulin synthesis defect       |
| Cyu11 | All | [X]Other specified hypothyroidism                          |
| Xa3ec | All | Hypothyroidism - congenital and acquired                   |
| C03.. | All | Congenital hypothyroidism                                  |
| Xa0l7 | All | Congenital hypothyroidism with diffuse goitre              |
| X40H8 | All | Congenital hypothyroidism without goitre                   |
| PK251 | All | Congenital thyroid aplasia                                 |
| X40HA | All | Congenital thyroid hypoplasia                              |
| X40HB | All | Congenital atrophy of thyroid                              |
| X40HC | All | Congenital hypothyroidism with ectopic thyroid             |
| C03y. | All | Other specified congenital hypothyroidism                  |
| XE107 | All | Congenital hypothyroidism NOS                              |
| X40I7 | All | Congenital iodine deficiency hypothyroidism                |
| X40I8 | All | Congenital iodine deficiency syndrome - myxoedematous type |
| X40I9 | All | Congenital iodine deficiency syndrome - mixed type         |
| X40HL | All | Iatrogenic hypothyroidism                                  |
| X40HM | All | Postablative hypothyroidism                                |
| XE109 | All | Post-surgical hypothyroidism                               |
| C0410 | All | Irradiation hypothyroidism                                 |
| X40HN | All | Radioactive iodine-induced hypothyroidism                  |
| C041. | All | Other postablative hypothyroidism                          |
| C041z | All | Postablative hypothyroidism NOS                            |
| C043. | All | Other iatrogenic hypothyroidism                            |
| C043z | All | Iatrogenic hypothyroidism NOS                              |
| X40HO | All | Drug-induced hypothyroidism                                |
| C0430 | All | Hypothyroidism resulting from para-aminosalicylic acid     |

|       |     |                                                      |
|-------|-----|------------------------------------------------------|
| C0431 | All | Hypothyroidism resulting from phenylbutazone         |
| C0432 | All | Hypothyroidism resulting from resorcinol             |
| X40HP | All | Post-infectious hypothyroidism                       |
| X40IB | All | Subclinical iodine deficiency hypothyroidism         |
| C042. | All | Iodine hypothyroidism                                |
| C1343 | All | TSH deficiency                                       |
| X40LB | All | Isolated TSH deficiency                              |
| X40LC | All | Idiopathic TSH deficiency                            |
| X40Hv | All | Hypothyroidism due to iodide trapping defect         |
| X40Hw | All | Hypothyroidism due to iodide organification defect   |
| X40Hx | All | Hypothyroidism due to coupling defect                |
| X40Hy | All | Hypothyroidism due to deiodase defect                |
| X40Hz | All | Hypothyroidism due to thyroglobulin synthesis defect |
| Cyu11 | All | [X]Other specified hypothyroidism                    |
| Xa3ec | All | Hypothyroidism - congenital and acquired             |
| Xa08g | All | Transient neonatal hypothyroidism                    |
| Q4337 | All | Neonatal jaundice with congenital hypothyroidism     |

**Supplementary table S4.8.** Read codes used to identify Grave's disease.

| <b>Grave's disease</b> |                |                                       |
|------------------------|----------------|---------------------------------------|
| <b>Read V2 Code</b>    | <b>Term ID</b> | <b>Description</b>                    |
| 66B4.                  | All            | Thyroid eye disease                   |
| C020.                  | All            | Graves' disease                       |
| C0200                  | All            | Toxic diffuse goitre with no crisis   |
| C0201                  | All            | Toxic diffuse goitre with crisis      |
| C020z                  | All            | Toxic diffuse goitre NOS              |
| F4G2.                  | All            | Endocrine exophthalmos                |
| F4G20                  | All            | Thyrotoxic exophthalmos               |
| F4G21                  | All            | Exophthalmic ophthalmoplegia          |
| F4G2z                  | All            | Endocrine exophthalmos NOS            |
| <b>Read CTV3 Code</b>  | <b>Term ID</b> | <b>Description</b>                    |
| F4G2.                  | All            | Dysthyroid ophthalmopathy             |
| F4G20                  | All            | Thyrotoxic exophthalmos               |
| F4G21                  | All            | Exophthalmic ophthalmoplegia          |
| F4G2z                  | All            | Endocrine exophthalmos NOS            |
| X400I                  | All            | Graves' disease                       |
| X40Gk                  | All            | Thyrotoxicosis due to Graves' disease |
| X400K                  | All            | Juvenile Graves' disease              |
| X400R                  | All            | Exophthalmic goitre                   |
| X40Gk                  | All            | Thyrotoxicosis due to Graves' disease |
| XS29G                  | All            | Thyroid eye disease                   |
| XE105                  | All            | Toxic diffuse goitre                  |
| C0200                  | All            | Toxic diffuse goitre with no crisis   |
| C0201                  | All            | Toxic diffuse goitre with crisis      |
| C020z                  | All            | Toxic diffuse goitre NOS              |



**Supplementary table S4.9.** Read codes used to identify psoriatic arthritis.

| <b>Psoriatic arthritis</b>    |                |                                                                   |
|-------------------------------|----------------|-------------------------------------------------------------------|
| <b>Read V2 Code</b>           | <b>Term ID</b> | <b>Description</b>                                                |
| M160.                         | All            | Psoriatic arthropathy                                             |
| M1601                         | All            | Distal interphalangeal psoriatic arthropathy                      |
| M160z                         | All            | Psoriatic arthropathy NOS                                         |
| Nyu13                         | All            | [X]Other psoriatic arthropathies                                  |
| M1600                         | All            | Psoriasis spondylitica                                            |
| M1602                         | All            | Arthritis mutilans                                                |
| <b>Read CTV3 Code</b>         | <b>Term ID</b> | <b>Description</b>                                                |
| M160.                         | All            | Psoriatic arthritis                                               |
| M1600                         | All            | Psoriatic arthritis with spine involvement                        |
| X7026                         | All            | Psoriatic arthritis with distal interphalangeal joint involvement |
| X7027                         | All            | Psoriatic arthritis - destructive type                            |
| X7028                         | All            | Psoriatic dactylitis                                              |
| X701u                         | All            | Juvenile psoriatic arthritis                                      |
| X701v                         | All            | Juvenile psoriatic arthritis with psoriasis                       |
| X701w                         | All            | Juvenile psoriatic arthritis without psoriasis                    |
| M160z                         | All            | Psoriatic arthropathy NOS                                         |
| Nyu13                         | All            | [X]Other psoriatic arthropathies                                  |
| <b>Ankylosing spondylitis</b> |                |                                                                   |
| <b>Read V2 Code</b>           | <b>Term ID</b> | <b>Description</b>                                                |
| N100.                         | All            | Ankylosing spondylitis                                            |
| N0450                         | All            | Juvenile ankylosing spondylitis                                   |
| <b>Read CTV3 Code</b>         | <b>Term ID</b> | <b>Description</b>                                                |
| N100.                         | All            | Ankylosing spondylitis                                            |
| X7023                         | All            | Ankylosing spondylitis with organ / system involvement            |
| X7024                         | All            | Ankylosing spondylitis with multisystem involvement               |
| X701x                         | All            | Juvenile ankylosing spondylitis                                   |

**Supplementary table S4.10.** Read codes used to identify ankylosing spondylitis.

| <b>Ankylosing spondylitis</b> |                |                                                        |
|-------------------------------|----------------|--------------------------------------------------------|
| <b>Read V2 Code</b>           | <b>Term ID</b> | <b>Description</b>                                     |
| N100.                         | All            | Ankylosing spondylitis                                 |
| N0450                         | All            | Juvenile ankylosing spondylitis                        |
| <b>Read CTV3 Code</b>         | <b>Term ID</b> | <b>Description</b>                                     |
| N100.                         | All            | Ankylosing spondylitis                                 |
| X7023                         | All            | Ankylosing spondylitis with organ / system involvement |
| X7024                         | All            | Ankylosing spondylitis with multisystem involvement    |
| X701x                         | All            | Juvenile ankylosing spondylitis                        |

**Supplementary table S4.11.** Read codes used to identify systemic lupus erythematosus.

| <b>Systemic lupus erythematosus</b> |                |                                                                  |
|-------------------------------------|----------------|------------------------------------------------------------------|
| <b>Read V2 Code</b>                 | <b>Term ID</b> | <b>Description</b>                                               |
| N000.                               | All            | Systemic lupus erythematosus                                     |
| N0000                               | All            | Disseminated lupus erythematosus                                 |
| N0001                               | All            | Libman-Sacks disease                                             |
| N0002                               | All            | Drug-induced systemic lupus erythematosus                        |
| N0003                               | All            | Systemic lupus erythematosus with organ or system involvement    |
| N0004                               | All            | Systemic lupus erythematosus with pericarditis                   |
| N0005                               | All            | Neonatal lupus erythematosus                                     |
| N0006                               | All            | Cerebral lupus                                                   |
| N000z                               | All            | Systemic lupus erythematosus NOS                                 |
| K01x4                               | All            | Nephrotic syndrome in systemic lupus erythematosus               |
| <b>Read CTV3 Code</b>               | <b>Term ID</b> | <b>Description</b>                                               |
| N000.                               | All            | Systemic lupus erythematosus                                     |
| X704X                               | All            | Systemic lupus erythematosus with organ/system involvement       |
| XE0da                               | All            | Lupus nephritis                                                  |
| X30Kn                               | All            | Lupus nephritis - WHO Class I                                    |
| X30Ko                               | All            | Lupus nephritis - WHO Class II                                   |
| X30Kp                               | All            | Lupus nephritis - WHO Class III                                  |
| X30Kq                               | All            | Lupus nephritis - WHO Class IV                                   |
| X30Kr                               | All            | Lupus nephritis - WHO Class V                                    |
| X30Ks                               | All            | Lupus nephritis - WHO Class VI                                   |
| XM197                               | All            | [EDTA] Lupus erythematosus associated with renal failure         |
| X00Dx                               | All            | Cerebral lupus                                                   |
| X704a                               | All            | Lupus panniculitis                                               |
| N0001                               | All            | Libman-Sacks disease                                             |
| XaC1J                               | All            | Systemic lupus erythematosus with pericarditis                   |
| X704c                               | All            | Systemic lupus erythematosus with multisystem involvement        |
| N0002                               | All            | Drug-induced systemic lupus erythematosus                        |
| N000z                               | All            | Systemic lupus erythematosus NOS                                 |
| Nyu43                               | All            | [X]Other forms of systemic lupus erythematosus                   |
| X0046                               | All            | Chorea in systemic lupus erythematosus                           |
| H57y4                               | All            | Lung disease with systemic lupus erythematosus                   |
| XaBE1                               | All            | Renal tubulo-interstitial disord in systemic lupus erythematosus |

**Supplementary table S4.12.** Read codes used to identify polymyalgia rheumatica.

| <b>Polymyalgia rheumatica</b> |                |                                                  |
|-------------------------------|----------------|--------------------------------------------------|
| <b>Read V2 Code</b>           | <b>Term ID</b> | <b>Description</b>                               |
| N20..                         | All            | Polymyalgia rheumatica                           |
| N200.                         | All            | Giant cell arteritis with polymyalgia rheumatica |
| <b>Read CTV3 Code</b>         | <b>Term ID</b> | <b>Description</b>                               |
| XE1FJ                         | All            | Polymyalgia rheumatica                           |
| X705I                         | All            | Giant cell arteritis with polymyalgia rheumatica |

**Supplementary table S4.13.** Read codes used to identify Sjögren's syndrome.

| <b>Sjögren's syndrome</b> |                |                                                            |
|---------------------------|----------------|------------------------------------------------------------|
| <b>Read V2 Code</b>       | <b>Term ID</b> | <b>Description</b>                                         |
| N002.                     | All            | Sicca (Sjogren's) syndrome                                 |
| F3967                     | All            | Myopathy due to Sjogren's disease                          |
| H57y3                     | All            | Lung disease with Sjogren's disease                        |
| <b>Read CTV3 Code</b>     | <b>Term ID</b> | <b>Description</b>                                         |
| Xa0hF                     | All            | Sjogren's syndrome                                         |
| X705A                     | All            | Primary Sjogren's syndrome                                 |
| X705B                     | All            | Primary Sjogren's syndrome with organ/system involvement   |
| X705C                     | All            | Primary Sjogren's syndrome with multisystem involvement    |
| X705D                     | All            | Secondary Sjogren's syndrome                               |
| X705E                     | All            | Secondary Sjogren's syndrome with organ/system involvement |
| X705F                     | All            | Secondary Sjogren's syndrome with multisystem involvement  |
| F3967                     | All            | Myopathy due to Sjogren's disease                          |
| H57y3                     | All            | Lung disease with Sjogren's disease                        |

**Supplementary table S4.14.** Read codes used to identify psoriasis.

| <b>Psoriasis</b>      |                |                                             |
|-----------------------|----------------|---------------------------------------------|
| <b>Read V2 Code</b>   | <b>Term ID</b> | <b>Description</b>                          |
| M16..                 | All            | Psoriasis and similar disorders             |
| M161.                 | All            | Other psoriasis                             |
| M1610                 | All            | Psoriasis unspecified                       |
| M1611                 | All            | Psoriasis annularis                         |
| M1612                 | All            | Psoriasis circinata                         |
| M1613                 | All            | Psoriasis diffusa                           |
| M1614                 | All            | Psoriasis discoidea                         |
| M1615                 | All            | Psoriasis geographica                       |
| M1616                 | All            | Guttate psoriasis                           |
| M1617                 | All            | Psoriasis gyrata                            |
| M1618                 | All            | Psoriasis inveterata                        |
| M1619                 | All            | Psoriasis ostracea                          |
| M161A                 | All            | Psoriasis palmaris                          |
| M161B                 | All            | Psoriasis plantaris                         |
| M161C                 | All            | Psoriasis punctata                          |
| M161D                 | All            | Pustular psoriasis                          |
| M161E                 | All            | Psoriasis universalis                       |
| M161F                 | All            | Psoriasis vulgaris                          |
| M161G                 | All            | Acrodermatitis continua                     |
| M161H                 | All            | Erythrodermic psoriasis                     |
| M161J                 | All            | Flexural psoriasis                          |
| M161z                 | All            | Psoriasis NOS                               |
| M166.                 | All            | Palmoplantar pustular psoriasis             |
| M16y.                 | All            | Other psoriasis and similar disorders       |
| M16y0                 | All            | Scalp psoriasis                             |
| M16z.                 | All            | Psoriasis and similar disorders NOS         |
| Myu30                 | All            | [X]Other psoriasis                          |
| <b>Read CTV3 Code</b> | <b>Term ID</b> | <b>Description</b>                          |
| X506Y                 | All            | Psoriasis                                   |
| XaY0x                 | All            | Pustular psoriasis                          |
| X506p                 | All            | Generalised pustular psoriasis              |
| X506q                 | All            | Acute generalised pustular psoriasis        |
| X506r                 | All            | Generalised pustular psoriasis of pregnancy |
| X506s                 | All            | Pustular psoriasis in children              |
| X506t                 | All            | Juvenile pustular psoriasis                 |
| X506u                 | All            | Infantile pustular psoriasis                |
| X506l                 | All            | Localised pustular psoriasis                |
| X506m                 | All            | Palmoplantar pustular psoriasis             |
| M07y0                 | All            | Acute palmoplantar pustular psoriasis       |
| M161A                 | All            | Psoriasis palmaris                          |

|       |     |                                          |
|-------|-----|------------------------------------------|
| M161B | All | Psoriasis plantaris                      |
| X506o | All | Lapiere type of psoriasis                |
| X506v | All | Circinate and annular pustular psoriasis |
| M1611 | All | Psoriasis annularis                      |
| M1612 | All | Psoriasis circinata                      |
| M1614 | All | Plaque psoriasis                         |
| XaNXa | All | Chronic large plaque psoriasis           |
| M1616 | All | Guttate psoriasis                        |
| X506Z | All | Flexural psoriasis                       |
| X506a | All | Unstable psoriasis                       |
| X506b | All | Erythrodermic psoriasis                  |
| X506i | All | Scalp psoriasis                          |
| M161. | All | Other psoriasis                          |
| M1610 | All | Psoriasis unspecified                    |
| M1613 | All | Psoriasis diffusa                        |
| M1615 | All | Psoriasis geographica                    |
| M1617 | All | Psoriasis gyrata                         |
| M1618 | All | Psoriasis inveterata                     |
| M161C | All | Psoriasis punctata                       |
| M161E | All | Psoriasis universalis                    |
| XaNXt | All | Psoriasis vulgaris                       |
| M161z | All | Psoriasis NOS                            |
| Myu30 | All | [X]Other psoriasis                       |

**Supplementary table S4.15.** Read codes used to identify vitiligo.

| <b>Vitiligo</b>       |                |                       |
|-----------------------|----------------|-----------------------|
| <b>Read V2 Code</b>   | <b>Term ID</b> | <b>Description</b>    |
| M2951                 | All            | Vitiligo              |
| F4E53                 | All            | Vitiligo of eyelid    |
| <b>Read CTV3 Code</b> | <b>Term ID</b> | <b>Description</b>    |
| M2951                 | All            | Vitiligo              |
| F4E53                 | All            | Vitiligo of eyelid    |
| X508z                 | All            | Occupational vitiligo |

**Supplementary table S4.16.** Read codes used to identify multiple sclerosis.

| <b>Multiple sclerosis</b> |                |                                                                                              |
|---------------------------|----------------|----------------------------------------------------------------------------------------------|
| <b>Read V2 Code</b>       | <b>Term ID</b> | <b>Description</b>                                                                           |
| 666A.                     | All            | Multiple sclerosis review                                                                    |
| 9mD..                     | All            | Multiple sclerosis monitoring administration                                                 |
| 9mD0.                     | All            | Multiple sclerosis monitoring first letter                                                   |
| 9mD1.                     | All            | Multiple sclerosis monitoring second letter                                                  |
| 9mD2.                     | All            | Multiple sclerosis monitoring telephone invitation                                           |
| 9mD3.                     | All            | Multiple sclerosis monitoring third letter                                                   |
| F20..                     | All            | Multiple sclerosis                                                                           |
| F200.                     | All            | Multiple sclerosis of the brain stem                                                         |
| F201.                     | All            | Multiple sclerosis of the spinal cord                                                        |
| F202.                     | All            | Generalised multiple sclerosis                                                               |
| F203.                     | All            | Exacerbation of multiple sclerosis                                                           |
| F204.                     | All            | Benign multiple sclerosis                                                                    |
| F205.                     | All            | Malignant multiple sclerosis                                                                 |
| F206.                     | All            | Primary progressive multiple sclerosis                                                       |
| F207.                     | All            | Relapsing and remitting multiple sclerosis                                                   |
| F208.                     | All            | Secondary progressive multiple sclerosis                                                     |
| F20z.                     | All            | Multiple sclerosis NOS                                                                       |
| 8CS1.                     | All            | Multiple sclerosis care plan agreed                                                          |
| 9kG..                     | All            | Specialised services for patients with multiple sclerosis - enhanced services administration |
| <b>Read CTV3 Code</b>     | <b>Term ID</b> | <b>Description</b>                                                                           |
| XaKvm                     | All            | Multiple sclerosis review                                                                    |
| XaKvn                     | All            | Multiple sclerosis multidisciplinary review                                                  |
| XaX9A                     | All            | Multiple sclerosis monitoring administration                                                 |
| XaX9F                     | All            | Multiple sclerosis monitoring first letter                                                   |
| XaX9H                     | All            | Multiple sclerosis monitoring second letter                                                  |
| XaX9J                     | All            | Multiple sclerosis monitoring telephone invitation                                           |
| XaX9L                     | All            | Multiple sclerosis monitoring third letter                                                   |
| F20..                     | All            | Multiple sclerosis                                                                           |
| XaP1V                     | All            | Secondary progressive multiple sclerosis                                                     |
| XaP1B                     | All            | Relapsing and remitting multiple sclerosis                                                   |
| XaP0r                     | All            | Primary progressive multiple sclerosis                                                       |
| XaP0X                     | All            | Malignant multiple sclerosis                                                                 |
| XaOzZ                     | All            | Benign multiple sclerosis                                                                    |
| X005c                     | All            | Acute relapsing multiple sclerosis                                                           |
| X005d                     | All            | Chronic progressive multiple sclerosis                                                       |
| X005e                     | All            | Remittent-progressive multiple sclerosis                                                     |
| F200.                     | All            | Multiple sclerosis of the brainstem                                                          |
| F201.                     | All            | Multiple sclerosis of the spinal cord                                                        |
| F202.                     | All            | Generalised multiple sclerosis                                                               |



|       |     |                                                                                            |
|-------|-----|--------------------------------------------------------------------------------------------|
| F203. | All | Exacerbation of multiple sclerosis                                                         |
| F20z. | All | Multiple sclerosis NOS                                                                     |
| XaPSc | All | Management of multiple sclerosis in palliative phase                                       |
| XaPSb | All | Management of multiple sclerosis in progressive disability phase                           |
| XaPSa | All | Management of multiple sclerosis in stable disability phase                                |
| XaPSZ | All | Management of multiple sclerosis in early disease phase                                    |
| XaPSY | All | Management of multiple sclerosis in onset phase                                            |
| XaXsg | All | Referral to community multiple sclerosis team                                              |
| XaKA8 | All | Specialised services for patients with multiple sclerosis enhanced services administration |
| XaKzg | All | Multiple sclerosis care plan agreed                                                        |

For peer review only

## Definitions of common infections with Read code lists.

**Supplementary table S5.1.** The case definitions for included Upper Respiratory Tract Infections.

| Upper Respiratory Tract Infections |         |                                                           |
|------------------------------------|---------|-----------------------------------------------------------|
| Read V2 Code                       | Term ID | Description                                               |
| F51..                              | All     | Nonsuppurative otitis media + eustachian tube disorders   |
| F510.                              | All     | Acute non suppurative otitis media                        |
| F5100                              | All     | Acute otitis media with effusion                          |
| F5101                              | All     | Acute serous otitis media                                 |
| F5102                              | All     | Acute mucoid otitis media                                 |
| F5103                              | All     | Acute sanguinous otitis media                             |
| F5104                              | All     | Acute allergic serous otitis media                        |
| F5105                              | All     | Acute allergic mucoid otitis media                        |
| F5106                              | All     | Acute allergic sanguinous otitis media                    |
| F510z                              | All     | Acute nonsuppurative otitis media NOS                     |
| F52..                              | All     | Suppurative and unspecified otitis media                  |
| F520.                              | All     | Acute suppurative otitis media                            |
| F5200                              | All     | Acute suppurative otitis media tympanic membrane intact   |
| F5201                              | All     | Acute suppurative otitis media tympanic membrane ruptured |
| F5203                              | All     | Acute suppurative otitis media due to disease EC          |
| F520z                              | All     | Acute suppurative otitis media NOS                        |
| F526.                              | All     | Acute left otitis media                                   |
| F527.                              | All     | Acute right otitis media                                  |
| F528.                              | All     | Acute bilateral otitis media                              |
| F52z.                              | All     | Otitis media NOS                                          |
| H00..                              | All     | Acute nasopharyngitis                                     |
| H01..                              | All     | Acute sinusitis                                           |
| H010.                              | All     | Acute maxillary sinusitis                                 |
| H011.                              | All     | Acute frontal sinusitis                                   |
| H012.                              | All     | Acute ethmoidal sinusitis                                 |
| H013.                              | All     | Acute sphenoidal sinusitis                                |
| H014.                              | All     | Acute rhinosinusitis                                      |
| H01y.                              | All     | Other acute sinusitis                                     |
| H01y0                              | All     | Acute pansinusitis                                        |
| H01yz                              | All     | Other acute sinusitis NOS                                 |
| H01z.                              | All     | Acute sinusitis NOS                                       |
| H02..                              | All     | Acute pharyngitis                                         |
| H020.                              | All     | Acute gangrenous pharyngitis                              |
| H021.                              | All     | Acute phlegmonous pharyngitis                             |
| H022.                              | All     | Acute ulcerative pharyngitis                              |

|       |     |                                             |
|-------|-----|---------------------------------------------|
| H023. | All | Acute bacterial pharyngitis                 |
| H0230 | All | Acute pneumococcal pharyngitis              |
| H0231 | All | Acute staphylococcal pharyngitis            |
| H023z | All | Acute bacterial pharyngitis NOS             |
| H024. | All | Acute viral pharyngitis                     |
| H025. | All | Allergic pharyngitis                        |
| H02z. | All | Acute pharyngitis NOS                       |
| H03.. | All | Acute tonsillitis                           |
| H030. | All | Acute erythematous tonsillitis              |
| H031. | All | Acute follicular tonsillitis                |
| H032. | All | Acute ulcerative tonsillitis                |
| H033. | All | Acute catarrhal tonsillitis                 |
| H034. | All | Acute gangrenous tonsillitis                |
| H035. | All | Acute bacterial tonsillitis                 |
| H0350 | All | Acute pneumococcal tonsillitis              |
| H0351 | All | Acute staphylococcal tonsillitis            |
| H035z | All | Acute bacterial tonsillitis NOS             |
| H036. | All | Acute viral tonsillitis                     |
| H037. | All | Recurrent acute tonsillitis                 |
| H03z. | All | Acute tonsillitis NOS                       |
| H04.. | All | Acute laryngitis and tracheitis             |
| H040. | All | Acute laryngitis                            |
| H0400 | All | Acute oedematous laryngitis                 |
| H0401 | All | Acute ulcerative laryngitis                 |
| H0402 | All | Acute catarrhal laryngitis                  |
| H0403 | All | Acute phlegmonous laryngitis                |
| H0404 | All | Acute haemophilus influenzae laryngitis     |
| H0405 | All | Acute pneumococcal laryngitis               |
| H0406 | All | Acute suppurative laryngitis                |
| H040w | All | Acute viral laryngitis unspecified          |
| H040x | All | Acute bacterial laryngitis unspecified      |
| H040z | All | Acute laryngitis NOS                        |
| H041. | All | Acute tracheitis                            |
| H0410 | All | Acute tracheitis without obstruction        |
| H0411 | All | Acute tracheitis with obstruction           |
| H041z | All | Acute tracheitis NOS                        |
| H042. | All | Acute laryngotracheitis                     |
| H0420 | All | Acute laryngotracheitis without obstruction |
| H0421 | All | Acute laryngotracheitis with obstruction    |
| H042z | All | Acute laryngotracheitis NOS                 |
| H043. | All | Acute epiglottitis (non strep)              |
| H0430 | All | Acute epiglottitis without obstruction      |

|                       |                |                                                             |
|-----------------------|----------------|-------------------------------------------------------------|
| H0431                 | All            | Acute epiglottitis with obstruction                         |
| H0432                 | All            | Acute obstructive laryngitis                                |
| H043z                 | All            | Acute epiglottitis NOS                                      |
| H044.                 | All            | Croup                                                       |
| H04z.                 | All            | Acute laryngitis and tracheitis NOS                         |
| H05..                 | All            | Other acute upper respiratory infections                    |
| H050.                 | All            | Acute laryngopharyngitis                                    |
| H051.                 | All            | Acute upper respiratory tract infection                     |
| H052.                 | All            | Pharyngotracheitis                                          |
| H053.                 | All            | Tracheopharyngitis                                          |
| H054.                 | All            | Recurrent upper respiratory tract infection                 |
| H055.                 | All            | Pharyngolaryngitis                                          |
| H05y.                 | All            | Other upper respiratory infections of multiple sites        |
| H05z.                 | All            | Upper respiratory infection NOS                             |
| H0y..                 | All            | Other specified acute respiratory infections                |
| H0z..                 | All            | Acute respiratory infection NOS                             |
| <b>Read CTV3 Code</b> | <b>Term ID</b> | <b>Description</b>                                          |
| A3401                 | All            | Streptococcal laryngitis                                    |
| A3403                 | All            | Streptococcal tonsillitis                                   |
| A740.                 | All            | Herpangina                                                  |
| AA12.                 | All            | Vincent's angina - pharyngitis                              |
| F51..                 | All            | Non-suppurative otitis media with eustachian tube disorders |
| F510.                 | All            | Acute non-suppurative otitis media                          |
| F5100                 | All            | Acute otitis media: [with effusion] or [secretory]          |
| F5101                 | All            | Acute non-suppurative otitis media - serous                 |
| F5102                 | All            | Acute non-suppurative otitis media - mucoid                 |
| F5103                 | All            | Acute non-suppurative otitis media - sanguinous             |
| F5104                 | All            | Acute allergic serous otitis media                          |
| F5105                 | All            | Acute allergic mucoid otitis media                          |
| F5106                 | All            | Acute allergic sanguinous otitis media                      |
| F510z                 | All            | Acute non-suppurative otitis media NOS                      |
| F52..                 | All            | Suppurative and unspecified otitis media                    |
| F520.                 | All            | Acute suppurative otitis media                              |
| F5200                 | All            | Acute suppurative otitis media - tympanic membrane intact   |
| F5201                 | All            | Acute suppurative otitis media - tympanic membrane ruptured |
| F5203                 | All            | Acute suppurative otitis media due to disease EC            |
| F520z                 | All            | Acute suppurative otitis media NOS                          |
| F526.                 | All            | Acute left otitis media                                     |
| F527.                 | All            | Acute right otitis media                                    |
| F528.                 | All            | Acute bilateral otitis media                                |
| F52z.                 | All            | Ear infection &/or otitis media NOS                         |
| FyuP0                 | All            | [X]Other acute non-suppurative otitis media                 |
| H00..                 | All            | (Acute nasopharyngitis or rhinitis) or (common cold)        |

|       |     |                                                                    |
|-------|-----|--------------------------------------------------------------------|
| H01.. | All | Sinusitis (& acute)                                                |
| H010. | All | Acute maxillary sinusitis                                          |
| H011. | All | Acute frontal sinusitis                                            |
| H012. | All | Acute ethmoidal sinusitis                                          |
| H013. | All | Acute sphenoidal sinusitis                                         |
| H014. | All | NULL                                                               |
| H01y. | All | Other acute sinusitis                                              |
| H01y0 | All | Acute pansinusitis                                                 |
| H01yz | All | Other acute sinusitis NOS                                          |
| H01z. | All | Acute sinusitis NOS                                                |
| H02.. | All | Throat: [acute pharyngitis] or [sore NOS (& viral)] or [infection] |
| H020. | All | Acute gangrenous pharyngitis                                       |
| H021. | All | Acute phlegmonous pharyngitis                                      |
| H022. | All | Acute ulcerative pharyngitis                                       |
| H023. | All | Acute bacterial pharyngitis                                        |
| H0230 | All | Acute pneumococcal pharyngitis                                     |
| H0231 | All | Acute staphylococcal pharyngitis                                   |
| H023z | All | Acute bacterial pharyngitis NOS                                    |
| H024. | All | Acute viral pharyngitis                                            |
| H025. | All | Allergic pharyngitis                                               |
| H02z. | All | Acute pharyngitis NOS                                              |
| H03.. | All | Tonsillitis (& acute)                                              |
| H030. | All | Acute erythematous tonsillitis                                     |
| H031. | All | Acute follicular tonsillitis                                       |
| H032. | All | Acute ulcerative tonsillitis                                       |
| H033. | All | Acute catarrhal tonsillitis                                        |
| H034. | All | Acute gangrenous tonsillitis                                       |
| H035. | All | Acute bacterial tonsillitis                                        |
| H0350 | All | Acute pneumococcal tonsillitis                                     |
| H0351 | All | Acute staphylococcal tonsillitis                                   |
| H035z | All | Acute bacterial tonsillitis NOS                                    |
| H036. | All | Acute viral tonsillitis                                            |
| H037. | All | Recurrent acute tonsillitis                                        |
| H03z. | All | Acute tonsillitis NOS                                              |
| H04.. | All | NULL                                                               |
| H040. | All | Acute laryngitis                                                   |
| H0400 | All | Acute oedematous laryngitis                                        |
| H0401 | All | Acute ulcerative laryngitis                                        |
| H0402 | All | Acute catarrhal laryngitis                                         |
| H0403 | All | Acute phlegmonous laryngitis                                       |
| H0404 | All | Acute haemophilus influenzae laryngitis                            |
| H0405 | All | Acute pneumococcal laryngitis                                      |

|       |     |                                                      |
|-------|-----|------------------------------------------------------|
| H0406 | All | Acute suppurative laryngitis                         |
| H040w | All | Acute viral laryngitis unspecified                   |
| H040x | All | Acute bacterial laryngitis unspecified               |
| H040z | All | Acute laryngitis NOS                                 |
| H041. | All | Acute tracheitis                                     |
| H0410 | All | Acute tracheitis without obstruction                 |
| H0411 | All | Acute tracheitis with obstruction                    |
| H041z | All | Acute tracheitis NOS                                 |
| H042. | All | Laryngotracheitis (& acute)                          |
| H0420 | All | Acute laryngotracheitis without obstruction          |
| H0421 | All | Acute laryngotracheitis with obstruction             |
| H042z | All | Acute laryngotracheitis NOS                          |
| H043. | All | Epiglottitis: [viral] or [acute non streptococcal]   |
| H0430 | All | Acute epiglottitis without obstruction               |
| H0431 | All | Acute epiglottitis with obstruction                  |
| H0432 | All | NULL                                                 |
| H043z | All | Acute epiglottitis NOS                               |
| H044. | All | NULL                                                 |
| H04z. | All | Acute laryngitis and tracheitis NOS                  |
| H05.. | All | Other acute upper respiratory infections             |
| H050. | All | Acute laryngopharyngitis                             |
| H051. | All | NULL                                                 |
| H052. | All | NULL                                                 |
| H053. | All | Tracheopharyngitis                                   |
| H054. | All | Recurrent upper respiratory tract infection          |
| H055. | All | Pharyngolaryngitis                                   |
| H05y. | All | Other upper respiratory infections of multiple sites |
| H05z. | All | Upper respiratory tract infection (& viral) NOS      |
| H0y.. | All | Other specified acute respiratory infections         |
| H0z.. | All | Acute respiratory infection NOS                      |
| X00iq | All | Recurrent acute suppurative otitis media             |
| X00m1 | All | Pott's puffy tumour                                  |
| X00mH | All | Acute herpes simplex pharyngitis                     |
| X00mI | All | Acute herpes zoster pharyngitis                      |
| X00mJ | All | Enteroviral lymphonodular pharyngitis                |
| X00mL | All | Glandular fever pharyngitis                          |
| X00mq | All | Vincent's tonsillitis                                |
| X00n1 | All | Acute simple laryngitis                              |
| X00n2 | All | Vincent's laryngitis                                 |
| X00n4 | All | Acute membranous laryngitis                          |
| X00n5 | All | Acute subglottic laryngitis                          |
| X00n6 | All | Recurrent allergic croup                             |

|       |     |                                                                              |
|-------|-----|------------------------------------------------------------------------------|
| X1003 | All | Viral upper respiratory tract infection NOS                                  |
| Xa0IW | All | Acute laryngotracheobronchitis                                               |
| Xa86D | All | Acute viral laryngotracheitis                                                |
| XaKyZ | All | Acute obstructive laryngitis                                                 |
| XE0Xo | All | Acute laryngotracheitis                                                      |
| XE0Xq | All | Upper respiratory infection NOS                                              |
| XE17D | All | Otitis media NOS                                                             |
| XE1A1 | All | Suppurative otitis media &/or ([left] or [right]) &/or purulent otitis media |
| XE2QD | All | Acute otitis media with effusion                                             |
| XM1QT | All | Acute fibrinous laryngotracheobronchitis                                     |

For peer review only



**Supplementary table S5.2.** The case definitions for included Lower Respiratory Tract Infections.

| <b>Lower Respiratory Tract Infections</b> |                |                                                       |
|-------------------------------------------|----------------|-------------------------------------------------------|
| <b>Pneumonia</b>                          |                |                                                       |
| <b>Read V2 Code</b>                       | <b>Term ID</b> | <b>Description</b>                                    |
| H20..                                     | All            | Viral pneumonia                                       |
| H200.                                     | All            | Pneumonia due to adenovirus                           |
| H201.                                     | All            | Pneumonia due to respiratory syncytial virus          |
| H202.                                     | All            | Pneumonia due to parainfluenza virus                  |
| H203.                                     | All            | Pneumonia due to human metapneumovirus                |
| H20y.                                     | All            | Viral pneumonia NEC                                   |
| H20y0                                     | All            | Severe acute respiratory syndrome                     |
| H20z.                                     | All            | Viral pneumonia NOS                                   |
| H21..                                     | All            | Lobar (pneumococcal) pneumonia                        |
| H22..                                     | All            | Other bacterial pneumonia                             |
| H220.                                     | All            | Pneumonia due to klebsiella pneumoniae                |
| H221.                                     | All            | Pneumonia due to pseudomonas                          |
| H222.                                     | All            | Pneumonia due to haemophilus influenzae               |
| H223.                                     | All            | Pneumonia due to streptococcus                        |
| H2230                                     | All            | Pneumonia due to streptococcus, group B               |
| H224.                                     | All            | Pneumonia due to staphylococcus                       |
| H22y.                                     | All            | Pneumonia due to other specified bacteria             |
| H22y0                                     | All            | Pneumonia due to escherichia coli                     |
| H22y1                                     | All            | Pneumonia due to proteus                              |
| H22y2                                     | All            | Pneumonia - Legionella                                |
| H22y3                                     | All            | Pneumonia due to Gram negative bacteria               |
| H22yX                                     | All            | Pneumonia due to other aerobic gram-negative bacteria |
| H22yz                                     | All            | Pneumonia due to bacteria NOS                         |
| H22z.                                     | All            | Bacterial pneumonia NOS                               |
| H23..                                     | All            | Pneumonia due to other specified organisms            |
| H230.                                     | All            | Pneumonia due to Eaton's agent                        |
| H231.                                     | All            | Pneumonia due to mycoplasma pneumoniae                |
| H232.                                     | All            | Pneumonia due to pleuropneumonia like organisms       |
| H233.                                     | All            | Chlamydial pneumonia                                  |
| H23z.                                     | All            | Pneumonia due to specified organism NOS               |
| H24..                                     | All            | Pneumonia with infectious diseases EC                 |
| H240.                                     | All            | Pneumonia with measles                                |
| H241.                                     | All            | Pneumonia with cytomegalic inclusion disease          |
| H242.                                     | All            | Pneumonia with ornithosis                             |
| H243.                                     | All            | Pneumonia with whooping cough                         |
| H244.                                     | All            | Pneumonia with tularaemia                             |
| H245.                                     | All            | Pneumonia with anthrax                                |
| H246.                                     | All            | Pneumonia with aspergillosis                          |

|                       |                |                                                 |
|-----------------------|----------------|-------------------------------------------------|
| H247.                 | All            | Pneumonia with other systemic mycoses           |
| H2470                 | All            | Pneumonia with candidiasis                      |
| H2471                 | All            | Pneumonia with coccidioidomycosis               |
| H2472                 | All            | Pneumonia with histoplasmosis                   |
| H247z                 | All            | Pneumonia with systemic mycosis NOS             |
| H24y.                 | All            | Pneumonia with other infectious diseases EC     |
| H24y0                 | All            | Pneumonia with actinomycosis                    |
| H24y1                 | All            | Pneumonia with nocardiasis                      |
| H24y2                 | All            | Pneumonia with pneumocystis carinii             |
| H24y3                 | All            | Pneumonia with Q-fever                          |
| H24y4                 | All            | Pneumonia with salmonellosis                    |
| H24y5                 | All            | Pneumonia with toxoplasmosis                    |
| H24y6                 | All            | Pneumonia with typhoid fever                    |
| H24y7                 | All            | Pneumonia with varicella                        |
| H24yz                 | All            | Pneumonia with other infectious diseases EC NOS |
| H24z.                 | All            | Pneumonia with infectious diseases EC NOS       |
| H25..                 | All            | Bronchopneumonia due to unspecified organism    |
| H26..                 | All            | Pneumonia due to unspecified organism           |
| H260.                 | All            | Lobar pneumonia due to unspecified organism     |
| H2600                 | All            | Lung consolidation                              |
| H261.                 | All            | Basal pneumonia due to unspecified organism     |
| H262.                 | All            | Postoperative pneumonia                         |
| H263.                 | All            | Pneumonitis, unspecified                        |
| H28..                 | All            | Atypical pneumonia                              |
| <b>Read CTV3 Code</b> | <b>Term ID</b> | <b>Description</b>                              |
| H20..                 | All            | Viral pneumonia (& chest infection)             |
| H200.                 | All            | Adenoviral pneumonia                            |
| H201.                 | All            | Pneumonia due to respiratory syncytial virus    |
| H202.                 | All            | Parainfluenzal pneumonia                        |
| H203.                 | All            | NULL                                            |
| H20y.                 | All            | Viral pneumonia NEC                             |
| H20y0                 | All            | NULL                                            |
| H20z.                 | All            | Viral pneumonia NOS                             |
| H21..                 | All            | Pneumococcal pneumonia (& lobar)                |
| H22..                 | All            | Other bacterial pneumonia                       |
| H220.                 | All            | Pneumonia due to Klebsiella pneumoniae          |
| H221.                 | All            | Pseudomonal pneumonia                           |
| H222.                 | All            | Haemophilus influenzae pneumonia                |
| H223.                 | All            | Streptococcal pneumonia                         |
| H2230                 | All            | Group B streptococcal pneumonia                 |
| H224.                 | All            | Staphylococcal pneumonia                        |
| H22y.                 | All            | Pneumonia due to other specified bacteria       |
| H22y0                 | All            | Escherichia coli pneumonia                      |
| H22y1                 | All            | Proteus pneumonia                               |

|       |     |                                                                             |
|-------|-----|-----------------------------------------------------------------------------|
| H22y2 | All | Legionella pneumonia                                                        |
| H22y3 | All | NULL                                                                        |
| H22yX | All | NULL                                                                        |
| H22yz | All | Pneumonia due to bacteria NOS                                               |
| H22z. | All | Bacterial pneumonia NOS                                                     |
| H23.. | All | Pneumonia due to other specified organisms                                  |
| H230. | All | NULL                                                                        |
| H231. | All | NULL                                                                        |
| H232. | All | Pneumonia due to pleuropneumonia-like organism                              |
| H233. | All | NULL                                                                        |
| H23z. | All | Pneumonia due to specified organism NOS                                     |
| H24.. | All | (Pneumonia) or (chest infection) with infectious diseases EC                |
| H240. | All | Measles pneumonia                                                           |
| H241. | All | Cytomegalovirus pneumonia                                                   |
| H242. | All | Ornithosis with pneumonia                                                   |
| H243. | All | Pertussis pneumonia                                                         |
| H244. | All | Tularaemia pneumonia                                                        |
| H245. | All | Anthrax pneumonia                                                           |
| H246. | All | Pneumonia with aspergillosis                                                |
| H247. | All | Pneumonia with other systemic mycoses                                       |
| H2470 | All | Candidal pneumonia                                                          |
| H2471 | All | Pneumonia with coccidioidomycosis                                           |
| H2472 | All | Pneumonia with histoplasmosis                                               |
| H247z | All | Pneumonia with systemic mycosis NOS                                         |
| H24y. | All | Pneumonia with other infectious diseases EC                                 |
| H24y0 | All | Actinomycotic pneumonia                                                     |
| H24y1 | All | Nocardial pneumonia                                                         |
| H24y2 | All | Pneumocystis carinii pneumonia                                              |
| H24y3 | All | Q fever pneumonia                                                           |
| H24y4 | All | NULL                                                                        |
| H24y5 | All | Toxoplasma pneumonia                                                        |
| H24y6 | All | Typhoid pneumonia                                                           |
| H24y7 | All | Chickenpox pneumonia                                                        |
| H24yz | All | Pneumonia with other infectious diseases EC NOS                             |
| H24z. | All | Pneumonia with infectious diseases EC NOS                                   |
| H25.. | All | Bronchopneumonia: [unspecified organism] or [chest infection - unspecified] |
| H26.. | All | Pneumonia due to unspecified organism                                       |
| H260. | All | Lobar pneumonia due to unspecified organism                                 |
| H2600 | All | NULL                                                                        |
| H261. | All | NULL                                                                        |
| H262. | All | NULL                                                                        |
| H263. | All | NULL                                                                        |
| H28.. | All | NULL                                                                        |
| X100h | All | Giant cell pneumonia                                                        |
| XaBE9 | All | Basal pneumonia due to unspecified organism                                 |

|                         |                |                                                        |
|-------------------------|----------------|--------------------------------------------------------|
| XaDtl                   | All            | Legionnaire's disease                                  |
| XEOYJ                   | All            | Bronchopneumonia due to unspecified organism           |
| <b>Acute Bronchitis</b> |                |                                                        |
| <b>Read V2 Code</b>     | <b>Term ID</b> | <b>Description</b>                                     |
| H06..                   | All            | Acute bronchitis and bronchiolitis                     |
| H060.                   | All            | Acute bronchitis                                       |
| H0600                   | All            | Acute fibrinous bronchitis                             |
| H0601                   | All            | Acute membranous bronchitis                            |
| H0602                   | All            | Acute pseudomembranous bronchitis                      |
| H0603                   | All            | Acute purulent bronchitis                              |
| H0604                   | All            | Acute croupous bronchitis                              |
| H0605                   | All            | Acute tracheobronchitis                                |
| H0606                   | All            | Acute pneumococcal bronchitis                          |
| H0607                   | All            | Acute streptococcal bronchitis                         |
| H0608                   | All            | Acute haemophilus influenzae bronchitis                |
| H0609                   | All            | Acute neisseria catarrhalis bronchitis                 |
| H060A                   | All            | Acute bronchitis due to mycoplasma pneumoniae          |
| H060B                   | All            | Acute bronchitis due to coxsackievirus                 |
| H060C                   | All            | Acute bronchitis due to parainfluenza virus            |
| H060D                   | All            | Acute bronchitis due to respiratory syncytial virus    |
| H060E                   | All            | Acute bronchitis due to rhinovirus                     |
| H060F                   | All            | Acute bronchitis due to echovirus                      |
| H060v                   | All            | Subacute bronchitis unspecified                        |
| H060w                   | All            | Acute viral bronchitis unspecified                     |
| H060x                   | All            | Acute bacterial bronchitis unspecified                 |
| H060z                   | All            | Acute bronchitis NOS                                   |
| H061.                   | All            | Acute bronchiolitis                                    |
| H0610                   | All            | Acute capillary bronchiolitis                          |
| H0611                   | All            | Acute obliterating bronchiolitis                       |
| H0612                   | All            | Acute bronchiolitis with bronchospasm                  |
| H0613                   | All            | Acute exudative bronchiolitis                          |
| H0614                   | All            | Obliterating fibrous bronchiolitis                     |
| H0615                   | All            | Acute bronchiolitis due to respiratory syncytial virus |
| H0616                   | All            | Acute bronchiolitis due to other specified organisms   |
| H0617                   | All            | Acute bronchiolitis due to human metapneumovirus       |
| H061z                   | All            | Acute bronchiolitis NOS                                |
| H062.                   | All            | Acute lower respiratory tract infection                |
| H06z.                   | All            | Acute bronchitis or bronchiolitis NOS                  |
| H06z0                   | All            | Chest infection NOS                                    |
| H06z1                   | All            | Lower resp tract infection                             |
| H06z2                   | All            | Recurrent chest infection                              |
| H30..                   | All            | Bronchitis unspecified                                 |
| H300.                   | All            | Tracheobronchitis NOS                                  |

|                |         |                                                        |
|----------------|---------|--------------------------------------------------------|
| H301.          | All     | Laryngotracheobronchitis                               |
| H302.          | All     | Wheezy bronchitis                                      |
| H30z.          | All     | Bronchitis NOS                                         |
| Read CTV3 Code | Term ID | Description                                            |
| A33y.          | All     | Whooping cough - other specified organism              |
| A33yz          | All     | Other whooping cough NOS                               |
| A33z.          | All     | Whooping cough NOS                                     |
| Ayu39          | All     | [X]Whooping cough due to other Bordetella species      |
| Ayu3A          | All     | [X]Whooping cough, unspecified                         |
| H06..          | All     | Acute bronchitis and bronchiolitis                     |
| H060.          | All     | Acute bronchitis (& wheezy)                            |
| H0600          | All     | Acute fibrinous bronchitis                             |
| H0601          | All     | Acute membranous bronchitis                            |
| H0602          | All     | Acute pseudomembranous bronchitis                      |
| H0603          | All     | Acute purulent bronchitis                              |
| H0604          | All     | Acute croupous bronchitis                              |
| H0605          | All     | Acute tracheobronchitis                                |
| H0606          | All     | Acute pneumococcal bronchitis                          |
| H0607          | All     | Acute streptococcal bronchitis                         |
| H0608          | All     | Acute haemophilus influenzae bronchitis                |
| H0609          | All     | Acute Neisseria catarrhalis bronchitis                 |
| H060A          | All     | NULL                                                   |
| H060B          | All     | Acute coxsackievirus bronchitis                        |
| H060C          | All     | Acute parainfluenza virus bronchitis                   |
| H060D          | All     | Acute respiratory syncytial virus bronchitis           |
| H060E          | All     | Acute bronchitis due to rhinovirus                     |
| H060F          | All     | Acute echovirus bronchitis                             |
| H060v          | All     | Subacute bronchitis unspecified                        |
| H060w          | All     | Acute viral bronchitis unspecified                     |
| H060x          | All     | Acute bacterial bronchitis unspecified                 |
| H060z          | All     | Acute bronchitis NOS                                   |
| H061.          | All     | Acute bronchiolitis                                    |
| H0610          | All     | Acute capillary bronchiolitis                          |
| H0611          | All     | Acute obliterating bronchiolitis                       |
| H0612          | All     | Acute bronchiolitis with bronchospasm                  |
| H0613          | All     | Acute exudative bronchiolitis                          |
| H0614          | All     | Obliterating fibrous bronchiolitis                     |
| H0615          | All     | Acute bronchiolitis due to respiratory syncytial virus |
| H0616          | All     | Acute bronchiolitis due to other specified organisms   |
| H0617          | All     | NULL                                                   |
| H061z          | All     | Acute bronchiolitis NOS                                |
| H062.          | All     | NULL                                                   |

|       |     |                                                                     |
|-------|-----|---------------------------------------------------------------------|
| H06z. | All | Acute bronchitis or bronchiolitis NOS                               |
| H06z0 | All | Chest infection (& NOS)                                             |
| H06z1 | All | Respiratory tract infection (& [acute lower] or [lower])            |
| H06z2 | All | NULL                                                                |
| H243. | All | Pertussis pneumonia                                                 |
| H30.. | All | Bronchitis: [unspecified (& chest infection)] or [recurrent wheezy] |
| H300. | All | Tracheobronchitis NOS                                               |
| H301. | All | Laryngotracheobronchitis                                            |
| H302. | All | NULL                                                                |
| H30z. | All | Bronchitis NOS                                                      |
| Hyu10 | All | [X]Acute bronchitis due to other specified organisms                |
| Hyu11 | All | [X]Acute bronchiolitis due to other specified organisms             |
| X1006 | All | Chest infection - unspecified bronchitis                            |
| X1007 | All | Acute bacterial bronchitis                                          |
| X1009 | All | Acute mycoplasmal bronchitis                                        |
| X100A | All | Acute chlamydial bronchitis                                         |
| X100B | All | Acute viral bronchitis                                              |
| X100C | All | Acute viral bronchiolitis                                           |
| X100D | All | Acute bronchiolitis due to adenovirus                               |
| Xa0IW | All | Acute laryngotracheobronchitis                                      |
| Xa0IZ | All | Asthmatic bronchitis                                                |
| XaDtB | All | Acute infective bronchitis                                          |
| XaDth | All | Acute infective tracheobronchitis                                   |
| XaYYt | All | Acute bronchiolitis due to human metapneumovirus                    |
| XE0Qw | All | Whooping cough                                                      |
| XE0Xr | All | Acute bronchitis                                                    |
| XE0YL | All | Bronchitis unspecified                                              |
| XE0Yt | All | Acute: [bronchitis] or [chest infections] or [tracheobronchitis]    |
| XM1QT | All | Acute fibrinous laryngotracheobronchitis                            |
| XM1QX | All | Acute wheezy bronchitis                                             |

**Supplementary table S5.3.** The case definitions for included Pneumonia and Pneumonitis.

| Pneumonia and Pneumonitis |         |                                                       |
|---------------------------|---------|-------------------------------------------------------|
| Read V2 Code              | Term ID | Description                                           |
| H20..                     | All     | Viral pneumonia                                       |
| H200.                     | All     | Pneumonia due to adenovirus                           |
| H201.                     | All     | Pneumonia due to respiratory syncytial virus          |
| H202.                     | All     | Pneumonia due to parainfluenza virus                  |
| H203.                     | All     | Pneumonia due to human metapneumovirus                |
| H20y.                     | All     | Viral pneumonia NEC                                   |
| H20y0                     | All     | Severe acute respiratory syndrome                     |
| H20z.                     | All     | Viral pneumonia NOS                                   |
| H21..                     | All     | Lobar (pneumococcal) pneumonia                        |
| H22..                     | All     | Other bacterial pneumonia                             |
| H220.                     | All     | Pneumonia due to klebsiella pneumoniae                |
| H221.                     | All     | Pneumonia due to pseudomonas                          |
| H222.                     | All     | Pneumonia due to haemophilus influenzae               |
| H223.                     | All     | Pneumonia due to streptococcus                        |
| H2230                     | All     | Pneumonia due to streptococcus, group B               |
| H224.                     | All     | Pneumonia due to staphylococcus                       |
| H22y.                     | All     | Pneumonia due to other specified bacteria             |
| H22y0                     | All     | Pneumonia due to escherichia coli                     |
| H22y1                     | All     | Pneumonia due to proteus                              |
| H22y2                     | All     | Pneumonia - Legionella                                |
| H22y3                     | All     | Pneumonia due to Gram negative bacteria               |
| H22yX                     | All     | Pneumonia due to other aerobic gram-negative bacteria |
| H22yz                     | All     | Pneumonia due to bacteria NOS                         |
| H22z.                     | All     | Bacterial pneumonia NOS                               |
| H23..                     | All     | Pneumonia due to other specified organisms            |
| H230.                     | All     | Pneumonia due to Eaton's agent                        |
| H231.                     | All     | Pneumonia due to mycoplasma pneumoniae                |
| H232.                     | All     | Pneumonia due to pleuropneumonia like organisms       |
| H233.                     | All     | Chlamydial pneumonia                                  |
| H23z.                     | All     | Pneumonia due to specified organism NOS               |
| H24..                     | All     | Pneumonia with infectious diseases EC                 |
| H240.                     | All     | Pneumonia with measles                                |
| H241.                     | All     | Pneumonia with cytomegalic inclusion disease          |
| H242.                     | All     | Pneumonia with ornithosis                             |
| H243.                     | All     | Pneumonia with whooping cough                         |
| H244.                     | All     | Pneumonia with tularaemia                             |
| H245.                     | All     | Pneumonia with anthrax                                |
| H246.                     | All     | Pneumonia with aspergillosis                          |
| H247.                     | All     | Pneumonia with other systemic mycoses                 |



|                       |                |                                                 |
|-----------------------|----------------|-------------------------------------------------|
| H2470                 | All            | Pneumonia with candidiasis                      |
| H2471                 | All            | Pneumonia with coccidioidomycosis               |
| H2472                 | All            | Pneumonia with histoplasmosis                   |
| H247z                 | All            | Pneumonia with systemic mycosis NOS             |
| H24y.                 | All            | Pneumonia with other infectious diseases EC     |
| H24y0                 | All            | Pneumonia with actinomycosis                    |
| H24y1                 | All            | Pneumonia with nocardiasis                      |
| H24y2                 | All            | Pneumonia with pneumocystis carinii             |
| H24y3                 | All            | Pneumonia with Q-fever                          |
| H24y4                 | All            | Pneumonia with salmonellosis                    |
| H24y5                 | All            | Pneumonia with toxoplasmosis                    |
| H24y6                 | All            | Pneumonia with typhoid fever                    |
| H24y7                 | All            | Pneumonia with varicella                        |
| H24yz                 | All            | Pneumonia with other infectious diseases EC NOS |
| H24z.                 | All            | Pneumonia with infectious diseases EC NOS       |
| H25..                 | All            | Bronchopneumonia due to unspecified organism    |
| H26..                 | All            | Pneumonia due to unspecified organism           |
| H260.                 | All            | Lobar pneumonia due to unspecified organism     |
| H2600                 | All            | Lung consolidation                              |
| H261.                 | All            | Basal pneumonia due to unspecified organism     |
| H262.                 | All            | Postoperative pneumonia                         |
| H263.                 | All            | Pneumonitis, unspecified                        |
| H28..                 | All            | Atypical pneumonia                              |
| <b>Read CTV3 Code</b> | <b>Term ID</b> | <b>Description</b>                              |
| H20..                 | All            | Viral pneumonia (& chest infection)             |
| H200.                 | All            | Adenoviral pneumonia                            |
| H201.                 | All            | Pneumonia due to respiratory syncytial virus    |
| H202.                 | All            | Parainfluenzal pneumonia                        |
| H203.                 | All            | NULL                                            |
| H20y.                 | All            | Viral pneumonia NEC                             |
| H20y0                 | All            | NULL                                            |
| H20z.                 | All            | Viral pneumonia NOS                             |
| H21..                 | All            | Pneumococcal pneumonia (& lobar)                |
| H22..                 | All            | Other bacterial pneumonia                       |
| H220.                 | All            | Pneumonia due to Klebsiella pneumoniae          |
| H221.                 | All            | Pseudomonal pneumonia                           |
| H222.                 | All            | Haemophilus influenzae pneumonia                |
| H223.                 | All            | Streptococcal pneumonia                         |
| H2230                 | All            | Group B streptococcal pneumonia                 |
| H224.                 | All            | Staphylococcal pneumonia                        |
| H22y.                 | All            | Pneumonia due to other specified bacteria       |
| H22y0                 | All            | Escherichia coli pneumonia                      |
| H22y1                 | All            | Proteus pneumonia                               |
| H22y2                 | All            | Legionella pneumonia                            |

|       |     |                                                                             |
|-------|-----|-----------------------------------------------------------------------------|
| H22y3 | All | NULL                                                                        |
| H22yX | All | NULL                                                                        |
| H22yz | All | Pneumonia due to bacteria NOS                                               |
| H22z. | All | Bacterial pneumonia NOS                                                     |
| H23.. | All | Pneumonia due to other specified organisms                                  |
| H230. | All | NULL                                                                        |
| H231. | All | NULL                                                                        |
| H232. | All | Pneumonia due to pleuropneumonia-like organism                              |
| H233. | All | NULL                                                                        |
| H23z. | All | Pneumonia due to specified organism NOS                                     |
| H24.. | All | (Pneumonia) or (chest infection) with infectious diseases EC                |
| H240. | All | Measles pneumonia                                                           |
| H241. | All | Cytomegalovirus pneumonia                                                   |
| H242. | All | Ornithosis with pneumonia                                                   |
| H243. | All | Pertussis pneumonia                                                         |
| H244. | All | Tularaemia pneumonia                                                        |
| H245. | All | Anthrax pneumonia                                                           |
| H246. | All | Pneumonia with aspergillosis                                                |
| H247. | All | Pneumonia with other systemic mycoses                                       |
| H2470 | All | Candidal pneumonia                                                          |
| H2471 | All | Pneumonia with coccidioidomycosis                                           |
| H2472 | All | Pneumonia with histoplasmosis                                               |
| H247z | All | Pneumonia with systemic mycosis NOS                                         |
| H24y. | All | Pneumonia with other infectious diseases EC                                 |
| H24y0 | All | Actinomycotic pneumonia                                                     |
| H24y1 | All | Nocardial pneumonia                                                         |
| H24y2 | All | Pneumocystis carinii pneumonia                                              |
| H24y3 | All | Q fever pneumonia                                                           |
| H24y4 | All | NULL                                                                        |
| H24y5 | All | Toxoplasma pneumonia                                                        |
| H24y6 | All | Typhoid pneumonia                                                           |
| H24y7 | All | Chickenpox pneumonia                                                        |
| H24yz | All | Pneumonia with other infectious diseases EC NOS                             |
| H24z. | All | Pneumonia with infectious diseases EC NOS                                   |
| H25.. | All | Bronchopneumonia: [unspecified organism] or [chest infection - unspecified] |
| H26.. | All | Pneumonia due to unspecified organism                                       |
| H260. | All | Lobar pneumonia due to unspecified organism                                 |
| H2600 | All | NULL                                                                        |
| H261. | All | NULL                                                                        |
| H262. | All | NULL                                                                        |
| H263. | All | NULL                                                                        |
| H28.. | All | NULL                                                                        |
| X100h | All | Giant cell pneumonia                                                        |
| XaBE9 | All | Basal pneumonia due to unspecified organism                                 |
| XaDtl | All | Legionnaire's disease                                                       |

1  
2  
3  
4  
5  
6  
7  
8  
9  
10  
11  
12  
13  
14  
15  
16  
17  
18  
19  
20  
21  
22  
23  
24  
25  
26  
27  
28  
29  
30  
31  
32  
33  
34  
35  
36  
37  
38  
39  
40  
41  
42  
43  
44  
45  
46  
47  
48  
49  
50  
51  
52  
53  
54  
55  
56  
57  
58  
59  
60

|       |     |                                              |
|-------|-----|----------------------------------------------|
| XEOYJ | All | Bronchopneumonia due to unspecified organism |
|-------|-----|----------------------------------------------|

For peer review only

**Supplementary table S5.4.** The case definitions for included Acute Bronchitis

| <b>Acute Bronchitis</b> |                |                                                        |
|-------------------------|----------------|--------------------------------------------------------|
| <b>Read V2 Code</b>     | <b>Term ID</b> | <b>Description</b>                                     |
| H06..                   | All            | Acute bronchitis and bronchiolitis                     |
| H060.                   | All            | Acute bronchitis                                       |
| H0600                   | All            | Acute fibrinous bronchitis                             |
| H0601                   | All            | Acute membranous bronchitis                            |
| H0602                   | All            | Acute pseudomembranous bronchitis                      |
| H0603                   | All            | Acute purulent bronchitis                              |
| H0604                   | All            | Acute croupous bronchitis                              |
| H0605                   | All            | Acute tracheobronchitis                                |
| H0606                   | All            | Acute pneumococcal bronchitis                          |
| H0607                   | All            | Acute streptococcal bronchitis                         |
| H0608                   | All            | Acute haemophilus influenzae bronchitis                |
| H0609                   | All            | Acute neisseria catarrhalis bronchitis                 |
| H060A                   | All            | Acute bronchitis due to mycoplasma pneumoniae          |
| H060B                   | All            | Acute bronchitis due to coxsackievirus                 |
| H060C                   | All            | Acute bronchitis due to parainfluenza virus            |
| H060D                   | All            | Acute bronchitis due to respiratory syncytial virus    |
| H060E                   | All            | Acute bronchitis due to rhinovirus                     |
| H060F                   | All            | Acute bronchitis due to echovirus                      |
| H060v                   | All            | Subacute bronchitis unspecified                        |
| H060w                   | All            | Acute viral bronchitis unspecified                     |
| H060x                   | All            | Acute bacterial bronchitis unspecified                 |
| H060z                   | All            | Acute bronchitis NOS                                   |
| H061.                   | All            | Acute bronchiolitis                                    |
| H0610                   | All            | Acute capillary bronchiolitis                          |
| H0611                   | All            | Acute obliterating bronchiolitis                       |
| H0612                   | All            | Acute bronchiolitis with bronchospasm                  |
| H0613                   | All            | Acute exudative bronchiolitis                          |
| H0614                   | All            | Obliterating fibrous bronchiolitis                     |
| H0615                   | All            | Acute bronchiolitis due to respiratory syncytial virus |
| H0616                   | All            | Acute bronchiolitis due to other specified organisms   |
| H0617                   | All            | Acute bronchiolitis due to human metapneumovirus       |
| H061z                   | All            | Acute bronchiolitis NOS                                |
| H062.                   | All            | Acute lower respiratory tract infection                |
| H06z.                   | All            | Acute bronchitis or bronchiolitis NOS                  |
| H06z0                   | All            | Chest infection NOS                                    |
| H06z1                   | All            | Lower resp tract infection                             |
| H06z2                   | All            | Recurrent chest infection                              |
| H30..                   | All            | Bronchitis unspecified                                 |
| H300.                   | All            | Tracheobronchitis NOS                                  |

|                       |                |                                                        |
|-----------------------|----------------|--------------------------------------------------------|
| H301.                 | All            | Laryngotracheobronchitis                               |
| H302.                 | All            | Wheezy bronchitis                                      |
| H30z.                 | All            | Bronchitis NOS                                         |
| <b>Read CTV3 Code</b> | <b>Term ID</b> | <b>Description</b>                                     |
| A33y.                 | All            | Whooping cough - other specified organism              |
| A33yz                 | All            | Other whooping cough NOS                               |
| A33z.                 | All            | Whooping cough NOS                                     |
| Ayu39                 | All            | [X]Whooping cough due to other Bordetella species      |
| Ayu3A                 | All            | [X]Whooping cough, unspecified                         |
| H06..                 | All            | Acute bronchitis and bronchiolitis                     |
| H060.                 | All            | Acute bronchitis (& wheezy)                            |
| H0600                 | All            | Acute fibrinous bronchitis                             |
| H0601                 | All            | Acute membranous bronchitis                            |
| H0602                 | All            | Acute pseudomembranous bronchitis                      |
| H0603                 | All            | Acute purulent bronchitis                              |
| H0604                 | All            | Acute croupous bronchitis                              |
| H0605                 | All            | Acute tracheobronchitis                                |
| H0606                 | All            | Acute pneumococcal bronchitis                          |
| H0607                 | All            | Acute streptococcal bronchitis                         |
| H0608                 | All            | Acute haemophilus influenzae bronchitis                |
| H0609                 | All            | Acute Neisseria catarrhalis bronchitis                 |
| H060A                 | All            | NULL                                                   |
| H060B                 | All            | Acute coxsackievirus bronchitis                        |
| H060C                 | All            | Acute parainfluenza virus bronchitis                   |
| H060D                 | All            | Acute respiratory syncytial virus bronchitis           |
| H060E                 | All            | Acute bronchitis due to rhinovirus                     |
| H060F                 | All            | Acute echovirus bronchitis                             |
| H060v                 | All            | Subacute bronchitis unspecified                        |
| H060w                 | All            | Acute viral bronchitis unspecified                     |
| H060x                 | All            | Acute bacterial bronchitis unspecified                 |
| H060z                 | All            | Acute bronchitis NOS                                   |
| H061.                 | All            | Acute bronchiolitis                                    |
| H0610                 | All            | Acute capillary bronchiolitis                          |
| H0611                 | All            | Acute obliterating bronchiolitis                       |
| H0612                 | All            | Acute bronchiolitis with bronchospasm                  |
| H0613                 | All            | Acute exudative bronchiolitis                          |
| H0614                 | All            | Obliterating fibrous bronchiolitis                     |
| H0615                 | All            | Acute bronchiolitis due to respiratory syncytial virus |
| H0616                 | All            | Acute bronchiolitis due to other specified organisms   |
| H0617                 | All            | NULL                                                   |
| H061z                 | All            | Acute bronchiolitis NOS                                |
| H062.                 | All            | NULL                                                   |

|       |     |                                                                     |
|-------|-----|---------------------------------------------------------------------|
| H06z. | All | Acute bronchitis or bronchiolitis NOS                               |
| H06z0 | All | Chest infection (& NOS)                                             |
| H06z1 | All | Respiratory tract infection (& [acute lower] or [lower])            |
| H06z2 | All | NULL                                                                |
| H243. | All | Pertussis pneumonia                                                 |
| H30.. | All | Bronchitis: [unspecified (& chest infection)] or [recurrent wheezy] |
| H300. | All | Tracheobronchitis NOS                                               |
| H301. | All | Laryngotracheobronchitis                                            |
| H302. | All | NULL                                                                |
| H30z. | All | Bronchitis NOS                                                      |
| Hyu10 | All | [X]Acute bronchitis due to other specified organisms                |
| Hyu11 | All | [X]Acute bronchiolitis due to other specified organisms             |
| X1006 | All | Chest infection - unspecified bronchitis                            |
| X1007 | All | Acute bacterial bronchitis                                          |
| X1009 | All | Acute mycoplasmal bronchitis                                        |
| X100A | All | Acute chlamydial bronchitis                                         |
| X100B | All | Acute viral bronchitis                                              |
| X100C | All | Acute viral bronchiolitis                                           |
| X100D | All | Acute bronchiolitis due to adenovirus                               |
| Xa0IW | All | Acute laryngotracheobronchitis                                      |
| Xa0IZ | All | Asthmatic bronchitis                                                |
| XaDtB | All | Acute infective bronchitis                                          |
| XaDth | All | Acute infective tracheobronchitis                                   |
| XaYYt | All | Acute bronchiolitis due to human metapneumovirus                    |
| XE0Qw | All | Whooping cough                                                      |
| XE0Xr | All | Acute bronchitis                                                    |
| XE0YL | All | Bronchitis unspecified                                              |
| XE0Yt | All | Acute: [bronchitis] or [chest infections] or [tracheobronchitis]    |
| XM1QT | All | Acute fibrinous laryngotracheobronchitis                            |
| XM1QX | All | Acute wheezy bronchitis                                             |

**Supplementary table S5.5.** The case definitions for included influenza and cases of influenza-like illness.

| <b>Influenza</b>      |                |                                                                                |
|-----------------------|----------------|--------------------------------------------------------------------------------|
| <b>Read V2 Code</b>   | <b>Term ID</b> | <b>Description</b>                                                             |
| 16L..                 | All            | Influenza-like symptoms                                                        |
| H27..                 | All            | Influenza                                                                      |
| H270.                 | All            | Influenza with pneumonia                                                       |
| H2700                 | All            | Influenza with bronchopneumonia                                                |
| H2701                 | All            | Influenza with pneumonia, influenza virus identified                           |
| H270z                 | All            | Influenza with pneumonia NOS                                                   |
| H271.                 | All            | Influenza with other respiratory manifestation                                 |
| H2710                 | All            | Influenza with laryngitis                                                      |
| H2711                 | All            | Influenza with pharyngitis                                                     |
| H271z                 | All            | Influenza with respiratory manifestations NOS                                  |
| H27y.                 | All            | Influenza with other manifestations                                            |
| H27y0                 | All            | Influenza with encephalopathy                                                  |
| H27y1                 | All            | Influenza with gastrointestinal tract involvement                              |
| H27yz                 | All            | Influenza with other manifestations NOS                                        |
| H27z.                 | All            | Influenza NOS                                                                  |
| H2A..                 | All            | Influenza due to Influenza A virus subtype H1N1                                |
| <b>Read CTV3 Code</b> | <b>Term ID</b> | <b>Description</b>                                                             |
| 16L..                 | All            | NULL                                                                           |
| G5203                 | All            | Acute myocarditis - influenzal                                                 |
| H27..                 | All            | Influenza                                                                      |
| H270.                 | All            | Influenzal pneumonia                                                           |
| H2700                 | All            | Influenza with bronchopneumonia                                                |
| H2701                 | All            | Influenza with pneumonia, influenza virus identified                           |
| H270z                 | All            | Influenza with pneumonia NOS                                                   |
| H271.                 | All            | Influenza with other respiratory manifestation                                 |
| H2710                 | All            | Influenza with laryngitis                                                      |
| H2711                 | All            | Influenza with pharyngitis                                                     |
| H271z                 | All            | Influenza with respiratory manifestations NOS                                  |
| H27y.                 | All            | Influenza with other manifestations                                            |
| H27y0                 | All            | Influenza with encephalopathy                                                  |
| H27y1                 | All            | Influenza with gastrointestinal tract involvement                              |
| H27yz                 | All            | Influenza with other manifestations NOS                                        |
| H27z.                 | All            | (Influenza like illness) or (influenza NOS)                                    |
| H2A..                 | All            | NULL                                                                           |
| Hyu04                 | All            | [X]Influenza with other respiratory manifestations, influenza virus identified |
| Hyu05                 | All            | [X]Influenza with other manifestations, influenza virus identified             |



|       |     |                                                                          |
|-------|-----|--------------------------------------------------------------------------|
| Hyu06 | All | [X]Influenza with other respiratory manifestations, virus not identified |
| Hyu07 | All | [X]Influenza with other manifestations, virus not identified             |
| XaC1s | All | Encephalitis due to influenza                                            |
| XaC2H | All | Encephalitis due to influenza-virus identified                           |
| XaEGX | All | Encephalitis due to influenza-specific virus not identified              |
| XaeVK | All | Influenza due to zoonotic influenza virus                                |
| XaeVL | All | Influenza due to pandemic influenza virus                                |
| XaeVM | All | Influenza due to seasonal influenza virus                                |
| XaeVN | All | Influenza with pneumonia due to seasonal influenza virus                 |
| XaIBK | All | Influenza-like symptoms                                                  |
| XaMih | All | Avian influenza                                                          |
| XaQQp | All | Influenza due to Influenza A virus subtype H1N1                          |
| XEOYK | All | Influenza NOS                                                            |
| XEOZJ | All | (Influenza NOS) or (influenza-like illness)                              |
| XM0rz | All | Influenza-like illness                                                   |
| XM0s0 | All | Flu-like illness NOS                                                     |

**Supplementary table S5.6.** The case definitions for included Skin infections.

| <b>Skin infections</b> |                |                                         |
|------------------------|----------------|-----------------------------------------|
| <b>Read V2 Code</b>    | <b>Term ID</b> | <b>Description</b>                      |
| M0...                  | All            | Skin and subcutaneous tissue infections |
| M00..                  | All            | Carbuncle                               |
| M000.                  | All            | Carbuncle of face                       |
| M0000                  | All            | Carbuncle of ear                        |
| M0001                  | All            | Carbuncle of face (excluding eye)       |
| M0002                  | All            | Carbuncle of nasal septum               |
| M0003                  | All            | Carbuncle of temple region              |
| M000z                  | All            | Carbuncle of face NOS                   |
| M001.                  | All            | Carbuncle of neck                       |
| M002.                  | All            | Carbuncle of trunk                      |
| M0020                  | All            | Carbuncle of chest wall                 |
| M0021                  | All            | Carbuncle of breast                     |
| M0022                  | All            | Carbuncle of back                       |
| M0023                  | All            | Carbuncle of abdominal wall             |
| M0024                  | All            | Carbuncle of umbilicus                  |
| M0025                  | All            | Carbuncle of flank                      |
| M0026                  | All            | Carbuncle of groin                      |
| M0027                  | All            | Carbuncle of perineum                   |
| M002z                  | All            | Carbuncle of trunk NOS                  |
| M003.                  | All            | Carbuncle of upper arm and forearm      |
| M0030                  | All            | Carbuncle of shoulder                   |
| M0031                  | All            | Carbuncle of axilla                     |
| M0032                  | All            | Carbuncle of upper arm                  |
| M0033                  | All            | Carbuncle of elbow                      |
| M0034                  | All            | Carbuncle of forearm                    |
| M003z                  | All            | Carbuncle of upper arm and forearm NOS  |
| M004.                  | All            | Carbuncle of hand                       |
| M0040                  | All            | Carbuncle of wrist                      |
| M0041                  | All            | Carbuncle of thumb                      |
| M0042                  | All            | Carbuncle of finger                     |
| M004z                  | All            | Carbuncle of hand NOS                   |
| M005.                  | All            | Carbuncle of buttock                    |
| M0050                  | All            | Carbuncle of anus                       |
| M0051                  | All            | Carbuncle of gluteal region             |
| M005z                  | All            | Carbuncle of buttock NOS                |
| M006.                  | All            | Carbuncle of leg (excluding foot)       |
| M0060                  | All            | Carbuncle of hip                        |
| M0061                  | All            | Carbuncle of thigh                      |
| M0062                  | All            | Carbuncle of knee                       |

|       |     |                                       |
|-------|-----|---------------------------------------|
| M0063 | All | Carbuncle of lower leg                |
| M0064 | All | Carbuncle of ankle                    |
| M006z | All | Carbuncle of leg (excluding foot) NOS |
| M007. | All | Carbuncle of foot                     |
| M0070 | All | Carbuncle of foot unspecified         |
| M0071 | All | Carbuncle of heel                     |
| M0072 | All | Carbuncle of toe                      |
| M007z | All | Carbuncle of foot NOS                 |
| M00y. | All | Carbuncle of other specified site     |
| M00y0 | All | Carbuncle of head (excluding face)    |
| M00yz | All | Carbuncle of other specified site NOS |
| M00z. | All | Carbuncle NOS                         |
| M01.. | All | Furuncle - boil                       |
| M010. | All | Boil of face                          |
| M0100 | All | Boil of ear                           |
| M0101 | All | Boil of face (excluding eye)          |
| M0102 | All | Boil of nasal septum                  |
| M0103 | All | Boil of temple region                 |
| M0104 | All | Boil of external nose                 |
| M010z | All | Boil of face NOS                      |
| M011. | All | Boil of neck                          |
| M012. | All | Boil of trunk                         |
| M0120 | All | Boil of chest wall                    |
| M0121 | All | Boil of breast                        |
| M0122 | All | Boil of back                          |
| M0123 | All | Boil of abdominal wall                |
| M0124 | All | Boil of umbilicus                     |
| M0125 | All | Boil of flank                         |
| M0126 | All | Boil of groin                         |
| M0127 | All | Boil of perineum                      |
| M012z | All | Boil of trunk NOS                     |
| M013. | All | Boil of upper arm and forearm         |
| M0130 | All | Boil of shoulder                      |
| M0131 | All | Boil of axilla                        |
| M0132 | All | Boil of upper arm                     |
| M0133 | All | Boil of elbow                         |
| M0134 | All | Boil of forearm                       |
| M013z | All | Boil of upper arm and forearm NOS     |
| M014. | All | Boil of hand                          |
| M0140 | All | Boil of wrist                         |
| M0141 | All | Boil of thumb                         |
| M0142 | All | Boil of finger                        |

|       |     |                                              |
|-------|-----|----------------------------------------------|
| M014z | All | Boil of hand NOS                             |
| M015. | All | Boil of buttock                              |
| M0150 | All | Boil of anus                                 |
| M0151 | All | Boil of gluteal region                       |
| M015z | All | Boil of buttock NOS                          |
| M016. | All | Boil of leg (excluding foot)                 |
| M0160 | All | Boil of hip                                  |
| M0161 | All | Boil of thigh                                |
| M0162 | All | Boil of knee                                 |
| M0163 | All | Boil of lower leg                            |
| M0164 | All | Boil of ankle                                |
| M016z | All | Boil of leg (excluding foot) NOS             |
| M017. | All | Boil of foot                                 |
| M0170 | All | Boil of foot unspecified                     |
| M0171 | All | Boil of heel                                 |
| M0172 | All | Boil of toe                                  |
| M017z | All | Boil of foot NOS                             |
| M01y. | All | Boil of other specified site                 |
| M01y0 | All | Boil of head (excluding face)                |
| M01yz | All | Boil of other specified site NOS             |
| M01z. | All | Boil NOS                                     |
| M01z0 | All | Multiple boils                               |
| M02.. | All | Cellulitis and abscess of finger and toe     |
| M020. | All | Cellulitis and abscess of finger             |
| M0200 | All | Cellulitis and abscess of finger unspecified |
| M0201 | All | Finger pulp abscess                          |
| M0202 | All | Onychia of finger                            |
| M0203 | All | Paronychia of finger                         |
| M0204 | All | Finger web space infection                   |
| M0205 | All | Pulp space infection of finger/thumb         |
| M020z | All | Cellulitis and abscess of finger NOS         |
| M021. | All | Cellulitis and abscess of toe                |
| M0210 | All | Cellulitis and abscess of toe unspecified    |
| M0211 | All | Onychia of toe                               |
| M0212 | All | Paronychia of toe                            |
| M0213 | All | Pulp space infection of toe                  |
| M021z | All | Cellulitis and abscess of toe NOS            |
| M02z. | All | Cellulitis and abscess of digit NOS          |
| M03.. | All | Other cellulitis and abscess                 |
| M030. | All | Cellulitis and abscess of face               |
| M0300 | All | Cellulitis and abscess of cheek (external)   |
| M0301 | All | Cellulitis and abscess of nose (external)    |

|       |     |                                                 |
|-------|-----|-------------------------------------------------|
| M0302 | All | Cellulitis and abscess of chin                  |
| M0303 | All | Cellulitis and abscess of submandibular region  |
| M0304 | All | Cellulitis and abscess of forehead              |
| M0305 | All | Cellulitis and abscess of temple region         |
| M0306 | All | Cellulitis of face                              |
| M030z | All | Cellulitis and abscess of face NOS              |
| M031. | All | Cellulitis and abscess of neck                  |
| M032. | All | Cellulitis and abscess of trunk                 |
| M0320 | All | Cellulitis and abscess of chest wall            |
| M0321 | All | Cellulitis and abscess of breast                |
| M0322 | All | Cellulitis and abscess of back                  |
| M0323 | All | Cellulitis and abscess of abdominal wall        |
| M0324 | All | Cellulitis and abscess of umbilicus             |
| M0325 | All | Cellulitis and abscess of flank                 |
| M0326 | All | Cellulitis and abscess of groin                 |
| M0327 | All | Cellulitis and abscess of perineum              |
| M0328 | All | Cellulitis of trunk                             |
| M032z | All | Cellulitis and abscess of trunk NOS             |
| M033. | All | Cellulitis and abscess of arm                   |
| M0330 | All | Cellulitis and abscess of shoulder              |
| M0331 | All | Cellulitis and abscess of axilla                |
| M0332 | All | Cellulitis and abscess of upper arm             |
| M0333 | All | Cellulitis and abscess of elbow                 |
| M0334 | All | Cellulitis and abscess of forearm               |
| M033z | All | Cellulitis and abscess of arm NOS               |
| M034. | All | Cellulitis and abscess of hand excluding digits |
| M0340 | All | Cellulitis and abscess of hand unspecified      |
| M0341 | All | Cellulitis and abscess of wrist                 |
| M034z | All | Cellulitis and abscess of hand NOS              |
| M035. | All | Cellulitis and abscess of buttock               |
| M036. | All | Cellulitis and abscess of leg excluding foot    |
| M0360 | All | Cellulitis and abscess of hip                   |
| M0361 | All | Cellulitis and abscess of thigh                 |
| M0362 | All | Cellulitis and abscess of knee                  |
| M0363 | All | Cellulitis and abscess of lower leg             |
| M0364 | All | Cellulitis and abscess of ankle                 |
| M036z | All | Cellulitis and abscess of leg NOS               |
| M037. | All | Cellulitis and abscess of foot excluding toe    |
| M0370 | All | Cellulitis and abscess of foot unspecified      |
| M0371 | All | Cellulitis and abscess of heel                  |
| M0372 | All | Cellulitis in diabetic foot                     |
| M037z | All | Cellulitis and abscess of foot NOS              |

|    |       |     |                                                        |
|----|-------|-----|--------------------------------------------------------|
| 1  |       |     |                                                        |
| 2  |       |     |                                                        |
| 3  |       |     |                                                        |
| 4  | M038. | All | Cellulitis of external ear                             |
| 5  | M03y. | All | Other specified cellulitis and abscess                 |
| 6  | M03y0 | All | Cellulitis and abscess of head unspecified             |
| 7  | M03z. | All | Cellulitis and abscess NOS                             |
| 8  | M03z0 | All | Cellulitis NOS                                         |
| 9  | M03z1 | All | Abscess NOS                                            |
| 10 | M03zz | All | Cellulitis and abscess NOS                             |
| 11 | M04.. | All | Acute lymphadenitis                                    |
| 12 | M040. | All | Acute lymphadenitis of trunk                           |
| 13 | M041. | All | Acute lymphadenitis of upper limb                      |
| 14 | M042. | All | Acute lymphadenitis of lower limb                      |
| 15 | M043. | All | Acute lymphadenitis of face, head and neck             |
| 16 | M05.. | All | Impetigo                                               |
| 17 | M050. | All | Impetigo contagiosa unspecified                        |
| 18 | M051. | All | Impetigo contagiosa bullosa                            |
| 19 | M052. | All | Impetigo contagiosa gyrata                             |
| 20 | M053. | All | Impetigo circinata                                     |
| 21 | M054. | All | Impetigo neonatorum                                    |
| 22 | M055. | All | Impetigo simplex                                       |
| 23 | M056. | All | Impetigo follicularis                                  |
| 24 | M057. | All | Chronic symmetrical impetigo                           |
| 25 | M05z. | All | Impetigo NOS                                           |
| 26 | M06.. | All | Pilonidal sinus/cyst                                   |
| 27 | M060. | All | Pilonidal cyst with abscess                            |
| 28 | M061. | All | Pilonidal cyst with no abscess                         |
| 29 | M062. | All | Pilonidal sinus with abscess                           |
| 30 | M063. | All | Pilonidal sinus without abscess                        |
| 31 | M06z. | All | Pilonidal sinus/cyst NOS                               |
| 32 | M07.. | All | Other local infections of skin and subcutaneous tissue |
| 33 | M070. | All | Pyoderma                                               |
| 34 | M0700 | All | Pyoderma chancriforme                                  |
| 35 | M0701 | All | Pyoderma faciale                                       |
| 36 | M0702 | All | Pyoderma gangrenosum                                   |
| 37 | M0703 | All | Pyoderma ulcerosum tropicalum                          |
| 38 | M070z | All | Pyoderma NOS                                           |
| 39 | M071. | All | Pyogenic granuloma                                     |
| 40 | M0710 | All | Pyogenic granuloma unspecified                         |
| 41 | M0711 | All | Pyogenic progressive granuloma                         |
| 42 | M0712 | All | Granuloma telangiectaticum                             |
| 43 | M0713 | All | Umbilical granuloma                                    |
| 44 | M071z | All | Pyogenic granuloma NOS                                 |
| 45 | M072. | All | Erythrasma                                             |
| 46 |       |     |                                                        |
| 47 |       |     |                                                        |
| 48 |       |     |                                                        |
| 49 |       |     |                                                        |
| 50 |       |     |                                                        |
| 51 |       |     |                                                        |
| 52 |       |     |                                                        |
| 53 |       |     |                                                        |
| 54 |       |     |                                                        |
| 55 |       |     |                                                        |
| 56 |       |     |                                                        |
| 57 |       |     |                                                        |
| 58 |       |     |                                                        |
| 59 |       |     |                                                        |
| 60 |       |     |                                                        |

|       |     |                                                                     |
|-------|-----|---------------------------------------------------------------------|
| M073. | All | Scalp infection                                                     |
| M07y. | All | Other specified local infection of skin or subcutaneous tissue      |
| M07y0 | All | Pustular bacterid                                                   |
| M07y1 | All | Ecthyma                                                             |
| M07y2 | All | Dermatitis vegetans                                                 |
| M07y3 | All | Perleche                                                            |
| M07y4 | All | Pitted keratolysis                                                  |
| M07y5 | All | Inflammation of scar                                                |
| M07yz | All | Other specified local infection of skin and subcutaneous tissue NOS |
| M07z. | All | Local infection skin/subcut tissue NOS                              |
| M07z0 | All | Infection foot                                                      |
| M07z1 | All | Infection toe                                                       |
| M07z2 | All | Infection finger                                                    |
| M08.. | All | Cutaneous cellulitis                                                |
| M080. | All | [X]Cellulitis of finger and toe                                     |
| M081. | All | [X]Cellulitis of other parts of limb                                |
| M082. | All | Cellulitis of face                                                  |
| M083. | All | Cellulitis of trunk                                                 |
| M084. | All | [X]Cellulitis of breast                                             |
| M085. | All | Cellulitis of leg                                                   |
| M086. | All | Cellulitis of ankle                                                 |
| M087. | All | Chronic paronychia                                                  |
| M088. | All | Cellulitis of arm                                                   |
| M089. | All | Cellulitis of neck                                                  |
| M08A. | All | Cellulitis of axilla                                                |
| M08B. | All | Cellulitis of foot                                                  |
| M08C. | All | Cellulitis of toe                                                   |
| M08y. | All | [X]Cellulitis of other sites                                        |
| M09.. | All | Cutaneous abscess                                                   |
| M090. | All | [X]Abscess of face                                                  |
| M091. | All | [X]Abscess of neck                                                  |
| M092. | All | [X]Abscess of trunk                                                 |
| M0920 | All | [X]Abscess of buttock                                               |
| M0921 | All | [X]Abdominal wall abscess                                           |
| M0922 | All | [X]Perineal abscess                                                 |
| M093. | All | [X]Abscess of buttock                                               |
| M094. | All | [X]Abscess of limb                                                  |
| M0940 | All | [X]Abscess of axilla                                                |
| M095. | All | Skin abscess                                                        |
| M09y. | All | [X]Abscess of other site                                            |
| M0y.. | All | Other specified infections of skin or subcutaneous tissue           |
| M0z.. | All | Skin and subcut tissue infection NOS                                |



| Read CTV3 Code | Term ID | Description                                                                   |
|----------------|---------|-------------------------------------------------------------------------------|
| A056.          | All     | Amoebic ulcer of skin                                                         |
| A05y1          | All     | Amoebic balanitis                                                             |
| A170.          | All     | Tuberculosis of skin & subcutaneous tissue (& tuberculous lupus)              |
| A1700          | All     | Lupus vulgaris                                                                |
| A1702          | All     | Scrofuloderma                                                                 |
| A1703          | All     | Tuberculosis - lupus NOS                                                      |
| A1706          | All     | Lichen scrofulosorum                                                          |
| A1707          | All     | Tuberculosis papulonecrotica                                                  |
| A1708          | All     | Tuberculosis verrucosa cutis                                                  |
| A170z          | All     | Tuberculosis of skin and subcutaneous tissue NOS                              |
| A171.          | All     | Tuberculous erythema nodosum                                                  |
| A1710          | All     | Erythema induratum                                                            |
| A171z          | All     | Erythema nodosum with tuberculosis NOS                                        |
| A201.          | All     | Cutaneous plague                                                              |
| A210.          | All     | Ulceroglandular tularaemia                                                    |
| A390.          | All     | (Cutaneous actinomycosis) or (erythrasma) or (trichomycosis axillaris)        |
| A394.          | All     | Madura foot - actinomycotic                                                   |
| A39z0          | All     | Maduromycosis NOS                                                             |
| A5320          | All     | Herpes zoster with dermatitis of eyelid                                       |
| A540.          | All     | Eczema herpeticum                                                             |
| A5441          | All     | Herpes simplex eyelid dermatitis                                              |
| A546.          | All     | Herpes simplex whitlow                                                        |
| A781.          | All     | Warts: [viral] or [verrucae]                                                  |
| A7810          | All     | Verruca vulgaris                                                              |
| A7811          | All     | Plantar wart                                                                  |
| A7812          | All     | (Warts: [genital] or [penile] or [venereal]) or (condylomata acuminatum)      |
| A7813          | All     | Warts: [perianal] or [anal]                                                   |
| A781z          | All     | Unspecified viral warts                                                       |
| A783.          | All     | Cat scratch disease                                                           |
| A990.          | All     | (Chancroid [& bubo]) or (Ducrey's chancre)                                    |
| A992.          | All     | (Granuloma inguinale) or (donovanosis) or (pudendal ulcer)                    |
| AA22.          | All     | Other early yaws skin lesions                                                 |
| AA23.          | All     | (Yaws hyperkeratosis) or (ghoul hand) or (wormeaten soles)                    |
| AB0..          | All     | (Dermatophytosis &/or tinea &/or ringworm) or (skin fungal infection)         |
| AB00.          | All     | (Dermatophytosis of scalp or beard) or (Kerion)                               |
| AB000          | All     | Scalp ringworm                                                                |
| AB001          | All     | Dermatophytosis of beard                                                      |
| AB00z          | All     | Dermatophytosis of scalp or beard NOS                                         |
| AB02.          | All     | Dermatophytosis of hand                                                       |
| AB03.          | All     | (Dermatophytosis of groin & perianal area) or (Dhobie itch) or (tinea cruris) |
| AB030          | All     | Dermatophytosis of groin                                                      |

|       |     |                                                                                                |
|-------|-----|------------------------------------------------------------------------------------------------|
| AB031 | All | Dermatophytosis of the perianal area                                                           |
| AB03z | All | Dermatophytosis of groin and perianal area NOS                                                 |
| AB04. | All | Dermatophytosis of foot (& tinea pedis)                                                        |
| AB05. | All | (Dermatophytosis of the body) or (herpes circinatus) or (tinea corporis)                       |
| AB06. | All | (Deep seated dermatophytosis) or (granuloma: [trichophyticum] or [Majocchi's])                 |
| AB0y. | All | Other specified dermatophytosis                                                                |
| AB0z. | All | Dermatophytosis NOS                                                                            |
| AB1.. | All | Dermatophytosis other and unspecified                                                          |
| AB10. | All | Pityriasis versicolor                                                                          |
| AB11. | All | Nigra: [tinea] or [keratomycosis]                                                              |
| AB1y. | All | Other specified dermatomycoses                                                                 |
| AB1z. | All | Dermatomycosis NOS                                                                             |
| AB230 | All | Candidal: [intertrigo] or [nappy rash] or [submammary]                                         |
| AB231 | All | Other skin candidiasis                                                                         |
| AB233 | All | Candidal paronychia                                                                            |
| AB330 | All | Coccidioidal granuloma                                                                         |
| AB500 | All | Cutaneous blastomycosis                                                                        |
| AB510 | All | Mucocutaneous-lymphangitic paracoccidioidomycosis                                              |
| AB620 | All | Cutaneous chromomycosis                                                                        |
| AB622 | All | Subcutaneous phaeohyphomycotic abscess and cyst                                                |
| AB64. | All | Mycotic: [mycetomas] or [madura foot]                                                          |
| AB640 | All | Actinomycotic mycetoma                                                                         |
| AD30. | All | (Scabies (& [Norwegian])) or (sarcoptic itch)                                                  |
| AD41. | All | (Infestation: [other arthropod] or [Chigoe] or [sand flea]) or (Jigger disease) or (Tungiasis) |
| Ayu50 | All | [X]Other early skin lesions of yaws                                                            |
| AyuH4 | All | [X]Other arthropod infestations                                                                |
| F4D10 | All | Stye                                                                                           |
| F4D4. | All | Infective eyelid dermatitis of types resulting in deformity                                    |
| F4D5. | All | Other eyelid infective dermatitis                                                              |
| F4D6. | All | Parasitic eyelid infestation                                                                   |
| F5011 | All | (Acute infective otitis externa) or (abscess external ear) or (cellulitis external ear)        |
| F5018 | All | Furunculosis of external auditory meatus                                                       |
| FyuB4 | All | [X]Parasitic infestation of eyelid in diseases classified elsewhere                            |
| FyuB5 | All | [X]Involvement of eyelid in other infectious diseases classified elsewhere                     |
| G7510 | All | Kawasaki's disease                                                                             |
| G751z | All | Acute febrile mucocutaneous lymph node syndrome NOS                                            |
| J574G | All | Perianal infection                                                                             |
| K2721 | All | Penile boil                                                                                    |
| K2722 | All | Penile carbuncle                                                                               |
| K2723 | All | Cellulitis of penis                                                                            |

|    |       |     |                                        |
|----|-------|-----|----------------------------------------|
| 1  |       |     |                                        |
| 2  |       |     |                                        |
| 3  |       |     |                                        |
| 4  | K2841 | All | Boil of scrotum                        |
| 5  | K2842 | All | Carbuncle of scrotum                   |
| 6  | K2843 | All | Cellulitis of scrotum                  |
| 7  | K4242 | All | Furuncle of vulva                      |
| 8  | K42y0 | All | Carbuncle of vagina                    |
| 9  | K42y1 | All | Carbuncle of labium                    |
| 10 | M0... | All | Infective dermatological disorders     |
| 11 | M00.. | All | Carbuncle                              |
| 12 | M000. | All | Carbuncle of face                      |
| 13 | M0000 | All | Carbuncle of ear                       |
| 14 | M0001 | All | Carbuncle of face (excluding eye)      |
| 15 | M0002 | All | Carbuncle of nasal septum              |
| 16 | M0003 | All | Carbuncle of temple region             |
| 17 | M000z | All | Carbuncle of face NOS                  |
| 18 | M001. | All | Carbuncle of neck                      |
| 19 | M002. | All | Carbuncle of trunk                     |
| 20 | M0020 | All | Carbuncle of chest wall                |
| 21 | M0021 | All | Carbuncle of breast                    |
| 22 | M0022 | All | Carbuncle of back                      |
| 23 | M0023 | All | Carbuncle of abdominal wall            |
| 24 | M0024 | All | Carbuncle of umbilicus                 |
| 25 | M0025 | All | Carbuncle of flank                     |
| 26 | M0026 | All | Carbuncle of groin                     |
| 27 | M0027 | All | Carbuncle of perineum                  |
| 28 | M002z | All | Carbuncle of trunk NOS                 |
| 29 | M003. | All | Carbuncle of upper arm and forearm     |
| 30 | M0030 | All | Carbuncle of shoulder                  |
| 31 | M0031 | All | Carbuncle of axilla                    |
| 32 | M0032 | All | Carbuncle of upper arm                 |
| 33 | M0033 | All | Carbuncle of elbow                     |
| 34 | M0034 | All | Carbuncle of forearm                   |
| 35 | M003z | All | Carbuncle of upper arm and forearm NOS |
| 36 | M004. | All | Carbuncle of hand                      |
| 37 | M0040 | All | Carbuncle of wrist                     |
| 38 | M0041 | All | Carbuncle of thumb                     |
| 39 | M0042 | All | Carbuncle of finger                    |
| 40 | M004z | All | Carbuncle of hand NOS                  |
| 41 | M005. | All | Carbuncle of buttock                   |
| 42 | M0050 | All | Carbuncle of anus                      |
| 43 | M0051 | All | Carbuncle of gluteal region            |
| 44 | M005z | All | Carbuncle of buttock NOS               |
| 45 | M006. | All | Carbuncle of leg (excluding foot)      |
| 46 |       |     |                                        |
| 47 |       |     |                                        |
| 48 |       |     |                                        |
| 49 |       |     |                                        |
| 50 |       |     |                                        |
| 51 |       |     |                                        |
| 52 |       |     |                                        |
| 53 |       |     |                                        |
| 54 |       |     |                                        |
| 55 |       |     |                                        |
| 56 |       |     |                                        |
| 57 |       |     |                                        |
| 58 |       |     |                                        |
| 59 |       |     |                                        |
| 60 |       |     |                                        |

|       |     |                                       |
|-------|-----|---------------------------------------|
| M0060 | All | Carbuncle of hip                      |
| M0061 | All | Carbuncle of thigh                    |
| M0062 | All | Carbuncle of knee                     |
| M0063 | All | Carbuncle of lower leg                |
| M0064 | All | Carbuncle of ankle                    |
| M006z | All | Carbuncle of leg (excluding foot) NOS |
| M007. | All | Carbuncle of foot                     |
| M0070 | All | Carbuncle of foot unspecified         |
| M0071 | All | Carbuncle of heel                     |
| M0072 | All | Carbuncle of toe                      |
| M007z | All | Carbuncle of foot NOS                 |
| M00y. | All | Carbuncle of other specified site     |
| M00y0 | All | Carbuncle of head (excluding face)    |
| M00yz | All | Carbuncle of other specified site NOS |
| M00z. | All | Carbuncle NOS                         |
| M01.. | All | Furuncle                              |
| M010. | All | Boil of face                          |
| M0100 | All | Boil of ear                           |
| M0101 | All | Boil of face (excluding eye)          |
| M0102 | All | Boil of nasal septum                  |
| M0103 | All | Boil of temple region                 |
| M0104 | All | Boil of external nose                 |
| M010z | All | Boil of face NOS                      |
| M011. | All | Boil of neck                          |
| M012. | All | Boil of trunk                         |
| M0120 | All | Boil of chest wall                    |
| M0121 | All | Boil of breast                        |
| M0122 | All | Boil of back                          |
| M0123 | All | Boil of abdominal wall                |
| M0124 | All | Boil of umbilicus                     |
| M0125 | All | Boil of flank                         |
| M0126 | All | Boil of groin                         |
| M0127 | All | Boil of perineum                      |
| M012z | All | Boil of trunk NOS                     |
| M013. | All | Boil of upper arm and forearm         |
| M0130 | All | Boil of shoulder                      |
| M0131 | All | Boil of axilla                        |
| M0132 | All | Boil of upper arm                     |
| M0133 | All | Boil of elbow                         |
| M0134 | All | Boil of forearm                       |
| M013z | All | Boil of upper arm and forearm NOS     |
| M014. | All | Boil of hand                          |

|       |     |                                                                                                                  |
|-------|-----|------------------------------------------------------------------------------------------------------------------|
| M0140 | All | Boil of wrist                                                                                                    |
| M0141 | All | Boil of thumb                                                                                                    |
| M0142 | All | Boil of finger                                                                                                   |
| M014z | All | Boil of hand NOS                                                                                                 |
| M015. | All | Boil of buttock                                                                                                  |
| M0150 | All | Boil of anus                                                                                                     |
| M0151 | All | Boil of gluteal region                                                                                           |
| M015z | All | Boil of buttock NOS                                                                                              |
| M016. | All | Boil of leg (excluding foot)                                                                                     |
| M0160 | All | Boil of hip                                                                                                      |
| M0161 | All | Boil of thigh                                                                                                    |
| M0162 | All | Boil of knee                                                                                                     |
| M0163 | All | Boil of lower leg                                                                                                |
| M0164 | All | Boil of ankle                                                                                                    |
| M016z | All | Boil of leg (excluding foot) NOS                                                                                 |
| M017. | All | Boil of foot                                                                                                     |
| M0170 | All | Boil of foot unspecified                                                                                         |
| M0171 | All | Boil of heel                                                                                                     |
| M0172 | All | Boil of toe                                                                                                      |
| M017z | All | Boil of foot NOS                                                                                                 |
| M01y. | All | Boil of other specified site                                                                                     |
| M01y0 | All | Boil of head (excluding face)                                                                                    |
| M01yz | All | Boil of other specified site NOS                                                                                 |
| M01z. | All | Boils: [Recurrent] or [multiple sites] or [NOS]                                                                  |
| M01z0 | All | Multiple boils                                                                                                   |
| M02.. | All | Cellulitis and abscess of finger and toe                                                                         |
| M020. | All | Cellulitis and abscess of finger                                                                                 |
| M0200 | All | Cellulitis and abscess of finger unspecified                                                                     |
| M0201 | All | (Finger pulp abscess) or (felon) or (whitlow)                                                                    |
| M0202 | All | Onychia of finger                                                                                                |
| M0203 | All | Finger: [perionychia] or [paronychia]                                                                            |
| M0204 | All | Finger web space infection                                                                                       |
| M0205 | All | Pulp space infection of finger/thumb                                                                             |
| M020z | All | Cellulitis and abscess of finger NOS                                                                             |
| M021. | All | Cellulitis and abscess of toe                                                                                    |
| M0210 | All | Cellulitis and abscess of toe unspecified                                                                        |
| M0211 | All | Onychia of toe                                                                                                   |
| M0212 | All | Paronychial infection of toe                                                                                     |
| M0213 | All | Pulp space infection of toe                                                                                      |
| M021z | All | Toe: [Perionychia] or [cellulitis and abscess NOS]                                                               |
| M02z. | All | Digit: [paronychial infection] or [infected nailfold] or [cellulitis and abscess of NOS] or [nail infection NOS] |

|       |     |                                                                                                                                           |
|-------|-----|-------------------------------------------------------------------------------------------------------------------------------------------|
| M03.. | All | (Skin area excluding digits of hand or foot: [abscess] or [acute lymphangitis of skin] or [cellulitis]) or (other cellulitis and abscess) |
| M030. | All | Cellulitis and abscess of face                                                                                                            |
| M0300 | All | Cellulitis and abscess of cheek (& external)                                                                                              |
| M0301 | All | Cellulitis and abscess of nose (& external)                                                                                               |
| M0302 | All | Cellulitis and abscess of chin                                                                                                            |
| M0303 | All | Cellulitis and abscess of submandibular region                                                                                            |
| M0304 | All | Cellulitis and abscess of forehead                                                                                                        |
| M0305 | All | Cellulitis and abscess of temple region                                                                                                   |
| M0306 | All | Cellulitis of face                                                                                                                        |
| M030z | All | Cellulitis and abscess of face NOS                                                                                                        |
| M031. | All | (Cellulitis and abscess of neck) or (cervical abscess)                                                                                    |
| M032. | All | Cellulitis and abscess of trunk                                                                                                           |
| M0320 | All | Cellulitis and abscess of chest wall                                                                                                      |
| M0321 | All | Cellulitis and abscess of breast                                                                                                          |
| M0322 | All | Cellulitis and abscess of back                                                                                                            |
| M0323 | All | Cellulitis and abscess of abdominal wall                                                                                                  |
| M0324 | All | Cellulitis and abscess of umbilicus                                                                                                       |
| M0325 | All | Cellulitis and abscess of flank                                                                                                           |
| M0326 | All | Cellulitis and abscess of groin                                                                                                           |
| M0327 | All | Cellulitis and abscess of perineum                                                                                                        |
| M0328 | All | Cellulitis of trunk                                                                                                                       |
| M032z | All | Cellulitis and abscess of trunk NOS                                                                                                       |
| M033. | All | Cellulitis and abscess of arm                                                                                                             |
| M0330 | All | Cellulitis and abscess of shoulder                                                                                                        |
| M0331 | All | Cellulitis and abscess of axilla                                                                                                          |
| M0332 | All | Cellulitis and abscess of upper arm                                                                                                       |
| M0333 | All | Cellulitis and abscess of elbow                                                                                                           |
| M0334 | All | Cellulitis and abscess of forearm                                                                                                         |
| M033z | All | Cellulitis and abscess of arm NOS                                                                                                         |
| M034. | All | Cellulitis and abscess of hand (& excluding digits)                                                                                       |
| M0340 | All | Hand: (abscess and/or cellulitis) of (dorsum or palm or unspecified)                                                                      |
| M0341 | All | Cellulitis and abscess of wrist                                                                                                           |
| M034z | All | Cellulitis and abscess of hand NOS                                                                                                        |
| M035. | All | Cellulitis and abscess of buttock                                                                                                         |
| M036. | All | Cellulitis and abscess of leg (& excluding foot)                                                                                          |
| M0360 | All | Cellulitis and abscess of hip                                                                                                             |
| M0361 | All | Cellulitis and abscess of thigh                                                                                                           |
| M0362 | All | Cellulitis and abscess of knee                                                                                                            |
| M0363 | All | Cellulitis and abscess of lower leg                                                                                                       |
| M0364 | All | Cellulitis and abscess of ankle                                                                                                           |
| M036z | All | Cellulitis and abscess of leg NOS                                                                                                         |
| M037. | All | Cellulitis and abscess of foot (& excluding toe)                                                                                          |

|       |     |                                                                       |
|-------|-----|-----------------------------------------------------------------------|
| M0370 | All | Cellulitis and abscess of foot unspecified                            |
| M0371 | All | Cellulitis and abscess of heel                                        |
| M0372 | All | Cellulitis in diabetic foot                                           |
| M037z | All | Cellulitis and abscess of foot NOS                                    |
| M038. | All | NULL                                                                  |
| M03y. | All | Other specified cellulitis and abscess                                |
| M03y0 | All | (Cellulitis and abscess of head unspecified) or (abscess of scalp)    |
| M03z. | All | Cellulitis and abscess NOS                                            |
| M03z0 | All | Cellulitis NOS                                                        |
| M03z1 | All | Abscess NOS                                                           |
| M03zz | All | (Cellulitis and abscess NOS) or (acute lymphangitis NOS)              |
| M04.. | All | Acute: [lymphadenitis] or [abscess lymph node] or [cervical adenitis] |
| M040. | All | Acute lymphadenitis of trunk                                          |
| M041. | All | Acute lymphadenitis of upper limb                                     |
| M042. | All | Acute lymphadenitis of lower limb                                     |
| M043. | All | Acute lymphadenitis of face, head and neck                            |
| M05.. | All | Impetigo                                                              |
| M050. | All | Impetigo contagiosa unspecified                                       |
| M051. | All | [Bullous impetigo] or [impetigo herpetiformis]                        |
| M052. | All | Impetigo contagiosa gyrata                                            |
| M053. | All | Impetigo circinata                                                    |
| M054. | All | Impetigo neonatorum                                                   |
| M055. | All | Impetigo simplex                                                      |
| M056. | All | Impetigo follicularis                                                 |
| M057. | All | Chronic symmetrical impetigo                                          |
| M05z. | All | Impetigo NOS                                                          |
| M06.. | All | Pilonidal sinus/cyst                                                  |
| M060. | All | Pilonidal cyst with abscess                                           |
| M061. | All | (Pilonidal cyst with no abscess) or (dermal sinus)                    |
| M062. | All | Pilonidal sinus with abscess                                          |
| M063. | All | Pilonidal sinus without abscess                                       |
| M06z. | All | Pilonidal sinus/cyst NOS                                              |
| M07.. | All | Other local infections of skin and subcutaneous tissue                |
| M070. | All | Pyogenic infection of skin and subcutis                               |
| M0700 | All | Chancriform pyoderma                                                  |
| M0701 | All | Pyoderma faciale                                                      |
| M0702 | All | Pyoderma gangrenosum                                                  |
| M0703 | All | Pyoderma ulcerosum tropicalum                                         |
| M070z | All | Pyoderma NOS                                                          |
| M071. | All | Pyogenic granuloma                                                    |
| M0710 | All | Pyogenic granuloma unspecified                                        |
| M0711 | All | Pyogenic progressive granuloma                                        |



|       |     |                                                                                                                                          |
|-------|-----|------------------------------------------------------------------------------------------------------------------------------------------|
| M0712 | All | NULL                                                                                                                                     |
| M0713 | All | Umbilical granuloma                                                                                                                      |
| M071z | All | Pyogenic granuloma NOS                                                                                                                   |
| M072. | All | NULL                                                                                                                                     |
| M073. | All | Scalp infection                                                                                                                          |
| M07y. | All | (Pustular eczema) or (other specified local infection of skin or subcutaneous tissue)                                                    |
| M07y0 | All | Acute palmoplantar pustular psoriasis                                                                                                    |
| M07y1 | All | Ecthyma                                                                                                                                  |
| M07y2 | All | Dermatitis vegetans                                                                                                                      |
| M07y3 | All | NULL                                                                                                                                     |
| M07y4 | All | NULL                                                                                                                                     |
| M07y5 | All | Inflammation of scar                                                                                                                     |
| M07yz | All | Infection: [toe] or [foot] or [finger] or [other specified local infection of skin and subcutaneous tissue NOS]                          |
| M07z. | All | (Septic spots) or (sinus) or (infected skin: [insect bite] or [ulcer] or [dermatitis] or [local infection skin/subcutaneous tissue NOS]) |
| M07z0 | All | NULL                                                                                                                                     |
| M07z1 | All | NULL                                                                                                                                     |
| M07z2 | All | NULL                                                                                                                                     |
| M08.. | All | NULL                                                                                                                                     |
| M080. | All | (Cellulitis: [of thumb] or [[X] of finger and toe]) or (nail bed infection) or (septic thumb)                                            |
| M081. | All | [X]Cellulitis of other parts limb                                                                                                        |
| M082. | All | NULL                                                                                                                                     |
| M083. | All | NULL                                                                                                                                     |
| M084. | All | [X]Cellulitis of breast                                                                                                                  |
| M085. | All | NULL                                                                                                                                     |
| M086. | All | Cellulitis of ankle                                                                                                                      |
| M087. | All | Chronic paronychia                                                                                                                       |
| M088. | All | NULL                                                                                                                                     |
| M089. | All | NULL                                                                                                                                     |
| M08A. | All | NULL                                                                                                                                     |
| M08B. | All | NULL                                                                                                                                     |
| M08C. | All | NULL                                                                                                                                     |
| M08y. | All | [X]Cellulitis of other sites                                                                                                             |
| M09.. | All | NULL                                                                                                                                     |
| M090. | All | Abscess of face                                                                                                                          |
| M091. | All | Abscess of neck                                                                                                                          |
| M092. | All | Abscess of trunk                                                                                                                         |
| M0920 | All | NULL                                                                                                                                     |
| M0921 | All | NULL                                                                                                                                     |
| M0922 | All | NULL                                                                                                                                     |
| M093. | All | Abscess of buttock                                                                                                                       |

|       |     |                                                                               |
|-------|-----|-------------------------------------------------------------------------------|
| M094. | All | Abscess of limb                                                               |
| M0940 | All | NULL                                                                          |
| M095. | All | NULL                                                                          |
| M09y. | All | [X]Abscess of other site                                                      |
| M0y.. | All | Other specified infections of skin or subcutaneous tissue                     |
| M0z.. | All | Infected: [sebaceous cyst] or [skin and subcut tissue NOS]                    |
| M102. | All | [Infective eczematoid dermatitis] or [Pustular eczema] or [Septic dermatitis] |
| M1512 | All | Erythema marginatum                                                           |
| M15y0 | All | Staphylococcal scalded skin syndrome                                          |
| M15y6 | All | Erythema marginatum in acute rheumatic fever                                  |
| M161A | All | Psoriasis palmaris                                                            |
| M161B | All | Psoriasis plantaris                                                           |
| M163. | All | Pityriasis rosea                                                              |
| M21y0 | All | Acrodermatitis chronica atrophicans                                           |
| M2440 | All | Dissecting cellulitis of scalp                                                |
| M2441 | All | Sycosis barbae                                                                |
| M2442 | All | Folliculitis depilans                                                         |
| M2443 | All | Pustular folliculitis                                                         |
| M2444 | All | Perifolliculitis                                                              |
| M2446 | All | Deep bacterial folliculitis                                                   |
| M2447 | All | Perifolliculitis of scalp                                                     |
| M244z | All | Folliculitis NOS                                                              |
| Myu0. | All | [X]Infections of the skin and subcutaneous tissue                             |
| Myu01 | All | [X]Other specified local infections of the skin and subcutaneous tissue       |
| Myu02 | All | [X]Impetiginisation of other dermatoses                                       |
| SP30. | All | Generalised vaccinia                                                          |
| X00hk | All | Cellulitis of external ear                                                    |
| X00hm | All | Cellulitis of pinna                                                           |
| X00hn | All | Abscess of pinna                                                              |
| X00IR | All | Lupus vulgaris of nose                                                        |
| X00YN | All | Cellulitis of eyelid                                                          |
| X00YS | All | Infectious dermatosis of eyelid                                               |
| X00YT | All | Bacterial dermatitis of eyelid                                                |
| X00YU | All | Impetigo of eyelid                                                            |
| X00YV | All | Viral dermatitis of eyelid                                                    |
| X00YW | All | Fungal dermatitis of eyelid                                                   |
| X20QY | All | Cancrum oris                                                                  |
| X4004 | All | Gangrenous balanitis                                                          |
| X400A | All | Mycoplasma balanitis                                                          |
| X400B | All | Chlamydial balanitis                                                          |
| X400w | All | Fournier's gangrene of scrotum                                                |
| X4087 | All | Vulval amoebiasis                                                             |

|       |     |                                                          |
|-------|-----|----------------------------------------------------------|
| X4089 | All | Chlamydial Bartholinitis                                 |
| X408C | All | Vulval warts                                             |
| X408D | All | Condyloma acuminata of vulva                             |
| X5002 | All | Viral dermatological disorders                           |
| X5003 | All | Pox virus infection of skin                              |
| X5004 | All | Vaccinia                                                 |
| X5005 | All | Eczema vaccinatum                                        |
| X5006 | All | Viral exanthem                                           |
| X5007 | All | Infectious mononucleosis exanthem                        |
| X500A | All | Dermatosis of suspected viral aetiology                  |
| X500b | All | Pseudomonas aeruginosa paronychia                        |
| X500B | All | Gianotti-Crosti syndrome                                 |
| X500E | All | Chlamydial dermatological disorders                      |
| X500f | All | Recurrent boils                                          |
| X500g | All | Boils of multiple sites                                  |
| X500I | All | Exanthem due to ornithosis                               |
| X500J | All | Bacterial dermatological disorders                       |
| X500K | All | Non-bullous impetigo                                     |
| X500L | All | Streptococcal impetigo                                   |
| X500M | All | Staphylococcal non-bullous impetigo                      |
| X500N | All | Secondary impetiginisation                               |
| X500O | All | Scalp folliculitis                                       |
| X500P | All | Staphylococcal folliculitis of scalp                     |
| X500q | All | Ecthyma gangrenosum                                      |
| X500Q | All | Gram-negative folliculitis                               |
| X500r | All | Sycosis                                                  |
| X500R | All | Staphylococcal granuloma                                 |
| X500s | All | Acute sycosis barbae                                     |
| X500t | All | Sycosis cruris                                           |
| X500u | All | Lupoid sycosis                                           |
| X500U | All | Abscess of skin                                          |
| X500v | All | Lupoid sycosis of beard                                  |
| X500V | All | Cervical abscess                                         |
| X500w | All | Folliculitis decalvans                                   |
| X500W | All | Abscess of skin area excluding digits of hand or foot    |
| X500x | All | Folliculitis keloidalis nuchae                           |
| X500X | All | Abscess of dorsum of hand                                |
| X500y | All | Chronic folliculitis of legs                             |
| X500Y | All | Abscess of palm of hand                                  |
| X500z | All | Cutaneous cellulitis                                     |
| X500Z | All | Abscess of scalp                                         |
| X5010 | All | Cellulitis of skin area excluding digits of hand or foot |

|       |     |                                                             |
|-------|-----|-------------------------------------------------------------|
| X5011 | All | Cellulitis of dorsum of hand                                |
| X5012 | All | Cellulitis of palm of hand                                  |
| X5013 | All | Necrotising fasciitis                                       |
| X5014 | All | Necrotising fasciitis of scrotum and perineum               |
| X5015 | All | Progressive bacterial synergistic gangrene                  |
| X5018 | All | Anaerobic cellulitis                                        |
| X501b | All | Non-pyogenic bacterial infection of skin                    |
| X501c | All | Erythrasma                                                  |
| X501d | All | Pitted keratolysis                                          |
| X501E | All | Cellulitis of leg                                           |
| X501G | All | Acute lymphangitis NOS                                      |
| X501H | All | Acute lymphangitis of skin excluding digits of hand or foot |
| X501I | All | Acute cervical adenitis                                     |
| X501J | All | Site-specific pyogenic infection of skin and subcutis       |
| X501N | All | Blistering distal dactylitis                                |
| X501O | All | Infection of nail                                           |
| X501Q | All | Infection of toe web                                        |
| X501r | All | Cutaneous involvement in listeriosis                        |
| X501R | All | Staphylococcal intertrigo                                   |
| X501S | All | Streptococcal intertrigo                                    |
| X501t | All | Fusobacterium infection of skin                             |
| X501U | All | Perianal streptococcal infection of newborn                 |
| X501v | All | Tropical ulcer                                              |
| X501V | All | Botryomycosis                                               |
| X501w | All | Desert sore                                                 |
| X501W | All | Staphylococcal botryomycosis                                |
| X501x | All | Corynebacterium pyogenes infection of skin                  |
| X501X | All | Cutaneous botryomycosis                                     |
| X501Z | All | Dermatitis gangrenosa infantum                              |
| X5020 | All | Moraxella infection of skin                                 |
| X5021 | All | Staphylococcal scarlatina                                   |
| X502a | All | Primary cutaneous blastomycosis                             |
| X502A | All | Tuberculide                                                 |
| X502B | All | Papular tuberculide                                         |
| X502E | All | Nodular tuberculide                                         |
| X502H | All | Cutaneous complication of BCG immunisation                  |
| X502I | All | BCG granuloma                                               |
| X502j | All | Chromomycosis                                               |
| X502J | All | BCG ulcer                                                   |
| X502I | All | Subcutaneous zygomycosis                                    |
| X502o | All | Systemic fungal infection affecting skin                    |
| X502p | All | Dermatophytide                                              |

|       |     |                                                |
|-------|-----|------------------------------------------------|
| X502P | All | Pityrosporum infection of skin                 |
| X502q | All | Trichophytide                                  |
| X502Q | All | Pityrosporum folliculitis                      |
| X502r | All | Microsporide                                   |
| X502R | All | Steroid-modified tinea infection               |
| X502s | All | Epidermophytide                                |
| X502t | All | Parasitic infestation of skin                  |
| X502u | All | Nematode infestation of skin                   |
| X502U | All | Cutaneous alternariosis                        |
| X502v | All | Streptocerciasis                               |
| X502V | All | Scytalidium dimidiatum infection of skin       |
| X502W | All | Scytalidium hyalinum infection of skin         |
| X502Y | All | Systemic mycosis affecting skin                |
| X5031 | All | Amoebiasis of skin                             |
| X5038 | All | Protozoal infestation of skin                  |
| X503J | All | Maculae ceruleae - disorder                    |
| X509H | All | Nail infection NOS                             |
| X509m | All | Erosive pustular dermatosis of the scalp       |
| X50BW | All | Infected skin ulcer                            |
| X50Dw | All | Eosinophilic panniculitis                      |
| X50FB | All | Eosinophilic cellulitis                        |
| X50GV | All | Bullous pyoderma                               |
| X70HA | All | Tuberculous chancre                            |
| X70HB | All | Acute tuberculous ulcer                        |
| X70HC | All | Acute miliary cutaneous tuberculosis           |
| X70HD | All | Cutaneous tuberculous gumma                    |
| X70Hy | All | Cutaneous mycobacterium ulcerans infection     |
| X70Hz | All | Cutaneous mycobacterium marinum infection      |
| X70I0 | All | Swimming pool granuloma                        |
| X70I1 | All | Fish tank granuloma                            |
| X70IA | All | Cutaneous streptococcal ulcer                  |
| X70IS | All | Gas gangrene of skin                           |
| X70JO | All | Herpes simplex infection of skin               |
| X70JP | All | Chronic mucocutaneous herpes simplex infection |
| X70Lc | All | Giant condyloma acuminata                      |
| X70LO | All | Facial wart                                    |
| X70LP | All | Hand wart                                      |
| X70LQ | All | Periungual wart                                |
| X70LR | All | Subungual wart                                 |
| X70LS | All | Filiform wart                                  |
| X70LT | All | Digitate wart                                  |
| X70LU | All | Butcher's wart                                 |

|       |     |                                  |
|-------|-----|----------------------------------|
| X70LV | All | Plane wart                       |
| X70LW | All | Mosaic plantar wart              |
| X70LX | All | Myrmecia plantar wart            |
| X70LY | All | Epidermodysplasia verruciformis  |
| X70LZ | All | Anogenital warts                 |
| X70N8 | All | Cutaneous gonorrhoea             |
| X70N9 | All | Gonococcal cellulitis            |
| X70NB | All | Chancroid - anogenital ulcer     |
| X70NC | All | Chancroid - extragenital ulcer   |
| X70Nd | All | Anal warts                       |
| X70ND | All | Chancroid - latent infection     |
| X70Nf | All | Penile warts                     |
| X70Nt | All | Donovanosis - anogenital ulcer   |
| X70Nu | All | Donovanosis - inguinal lesion    |
| X70Nv | All | Donovanosis - non-genital lesion |
| X70OR | All | Bacillary angiomatosis           |
| X70Pi | All | Leptospiral rash                 |
| X70PJ | All | Penile amoebiasis                |
| X70PL | All | Amoebic abscess of skin          |
| X70Pn | All | Plantar papillomata of yaws      |
| X70Po | All | Palmar papillomata of yaws       |
| X70Pp | All | Macular yaws                     |
| X70Pq | All | Maculopapular yaws               |
| X70Pr | All | Micropapular yaws                |
| X70Ps | All | Papular yaws                     |
| X70Pt | All | Palmar yaws hyperkeratosis       |
| X70Pu | All | Plantar yaws hyperkeratosis      |
| X70PY | All | Erythema chronicum migrans       |
| X70Qe | All | Cutaneous aspergillosis          |
| X70QJ | All | Fungal dermatosis                |
| X70QK | All | Mycetoma                         |
| X70QM | All | Kerion                           |
| X70QN | All | Favus                            |
| X70QO | All | Tinea faciei                     |
| X70Qp | All | Perineal candidiasis             |
| X70QP | All | Tinea cruris                     |
| X70QQ | All | Nodular folliculitis             |
| X70Qr | All | Candidiasis of skin              |
| X70QR | All | Trichomyces axillaris            |
| X70Qs | All | Napkin candidiasis               |
| X70QS | All | Tinea imbricata                  |
| X70Qt | All | Submammary intertrigo            |

|       |     |                                          |
|-------|-----|------------------------------------------|
| X70Qu | All | Candidiasis of finger web                |
| X70Rc | All | Cutaneous histoplasmosis                 |
| X70Rd | All | Primary cutaneous histoplasmosis         |
| X70RD | All | Cutaneous cryptococcosis                 |
| X70Re | All | Disseminated cutaneous histoplasmosis    |
| X70RG | All | Cutaneous coccidioidomycosis             |
| X70Rh | All | Disseminated cutaneous blastomycosis     |
| X70RH | All | Subcutaneous coccidioidomycosis          |
| X70Rj | All | Cutaneous lobomycosis                    |
| X70Rk | All | Primary lobomycotic nodule               |
| X70RI | All | Chronic coalescent cutaneous lobomycosis |
| X70Rw | All | Cutaneous trichosporonosis               |
| X70Rz | All | Cutaneous chromoblastomycosis            |
| X70S0 | All | Primary chromoblastomycotic nodule       |
| X70S1 | All | Cutaneous chromoblastomycotic abscess    |
| X70S2 | All | Lymphocutaneous chromoblastomycosis      |
| X70S5 | All | Phaeohyphomycosis of skin                |
| X70S6 | All | Phaeohyphomycotic subcutaneous cyst      |
| X70SK | All | Conidiobolomycosis                       |
| X70SL | All | Rhinofacial conidiobolomycosis           |
| X70SM | All | Disseminated conidiobolomycosis          |
| X70SO | All | Cutaneous basidiobolomycosis             |
| X70Tk | All | Onchodermatitis                          |
| X70Tm | All | Onchocercal subcutaneous nodule          |
| X70Tn | All | Onchocercal depigmentation               |
| X70To | All | Onchocercal lichenification              |
| X70Tp | All | Sowda                                    |
| X70UA | All | Cutaneous strongyloidiasis               |
| X70UB | All | Strongyloidal ground itch                |
| X70UC | All | Strongyloidal cutaneous larva migrans    |
| X70UD | All | Larva currens                            |
| X70UJ | All | Gnathostomal cutaneous larva migrans     |
| X70Ut | All | Scabetic nodule                          |
| X70Uu | All | Post-scabetic nodule                     |
| X70Uv | All | Crusted scabies                          |
| X70Uy | All | Arthropod dermatosis                     |
| X70Uz | All | Dermatosis due to mites                  |
| X70V0 | All | Grocer's itch                            |
| X70V1 | All | Baker's itch                             |
| X70V2 | All | Copra itch                               |
| X70V3 | All | Straw itch                               |
| X70V4 | All | Grain itch                               |



|    |       |     |                                                |
|----|-------|-----|------------------------------------------------|
| 1  |       |     |                                                |
| 2  |       |     |                                                |
| 3  |       |     |                                                |
| 4  | X70V5 | All | Grain-shoveller's itch                         |
| 5  | X70V6 | All | Cotton-seed itch                               |
| 6  | X70V7 | All | Bean itch                                      |
| 7  | X70V8 | All | Barley itch                                    |
| 8  | X70V9 | All | Demodex folliculitis                           |
| 9  | X70VA | All | Dermatophagoidal dermatosis                    |
| 10 | X70VB | All | Animal mite infestation                        |
| 11 | X70VC | All | Cheyletiella dermatitis                        |
| 12 | X70VD | All | Dog mite infestation                           |
| 13 | X70VE | All | Cat mite infestation                           |
| 14 | X70VF | All | Rabbit mite infestation                        |
| 15 | X70VG | All | Rat mite infestation                           |
| 16 | X70VH | All | Mouse mite infestation                         |
| 17 | X70VI | All | Bird mite infestation                          |
| 18 | X70VK | All | Fowl mite infestation                          |
| 19 | X70VL | All | Chiggers infestation                           |
| 20 | X70VM | All | Dermatoses due to plant mites                  |
| 21 | X70VN | All | Dermatosis due to bug                          |
| 22 | X70VQ | All | Flea infestation                               |
| 23 | X70VR | All | Jiggers infestation                            |
| 24 | X70VS | All | Tongueworm infection                           |
| 25 | X70VT | All | Tongueworm cyst                                |
| 26 | X70VU | All | Tongueworm granuloma                           |
| 27 | X70VV | All | Halzoun                                        |
| 28 | X75vf | All | Paronychia                                     |
| 29 | X75vg | All | Bacterial paronychia                           |
| 30 | X75wp | All | Folliculitis of lids                           |
| 31 | X78Rn | All | Infected sebaceous cyst                        |
| 32 | X78Rs | All | Warty dyskeratoma                              |
| 33 | XA00w | All | Infected insect bite                           |
| 34 | Xa0Aq | All | Neonatal pyoderma                              |
| 35 | Xa0bE | All | Streptococcal cellulitis                       |
| 36 | Xa0bF | All | Meleney's gangrene                             |
| 37 | Xa0bG | All | Cutaneous African histoplasmosis               |
| 38 | Xa0bl | All | Larva migrans of skin                          |
| 39 | Xa0kT | All | Amoebic granuloma of skin                      |
| 40 | Xa0Qy | All | Complicated donovanosis                        |
| 41 | Xa0Ws | All | Staphylococcus aureus superficial folliculitis |
| 42 | Xa139 | All | Site-specific infective disorders of skin      |
| 43 | Xa13A | All | Intertrigo                                     |
| 44 | Xa13C | All | Submammary monilia                             |
| 45 | Xa1y2 | All | Abscess of toe                                 |
| 46 |       |     |                                                |
| 47 |       |     |                                                |
| 48 |       |     |                                                |
| 49 |       |     |                                                |
| 50 |       |     |                                                |
| 51 |       |     |                                                |
| 52 |       |     |                                                |
| 53 |       |     |                                                |
| 54 |       |     |                                                |
| 55 |       |     |                                                |
| 56 |       |     |                                                |
| 57 |       |     |                                                |
| 58 |       |     |                                                |
| 59 |       |     |                                                |
| 60 |       |     |                                                |

|       |     |                                            |
|-------|-----|--------------------------------------------|
| Xa1ZW | All | Cutaneous disorders of Yaws                |
| Xa2jn | All | Cellulitis of arm                          |
| Xa3gD | All | Carbuncle/boil                             |
| Xa3gE | All | Cellulitis of toe                          |
| Xa3gF | All | Cellulitis of hand excluding finger        |
| Xa3gG | All | Cellulitis of leg, excluding foot          |
| Xa3gH | All | Cellulitis of foot excluding toe           |
| Xa40b | All | Cellulitis - digit NOS                     |
| Xa6qC | All | Perineal wart                              |
| Xa6qD | All | Female perineal wart                       |
| Xa7Ht | All | Cellulitis of heel                         |
| Xa7Hw | All | Axillary abscess                           |
| Xa7I2 | All | Periorbital cellulitis                     |
| Xa7Ic | All | Infected nail bed                          |
| Xa7Id | All | Cellulitis of scalp                        |
| Xa7Iv | All | Infected face                              |
| Xa7Iz | All | Infected heel                              |
| Xa7m0 | All | Infected thumb                             |
| Xa7m3 | All | Septic finger                              |
| Xa7m4 | All | Infected hand                              |
| Xa7nf | All | Intertrigo of abdominal skin fold          |
| Xa7Ni | All | Infection toe                              |
| Xa7Nj | All | Infection foot                             |
| Xa7Nk | All | Infection finger                           |
| Xa7yw | All | Abscess of finger                          |
| Xa82g | All | Perineal abscess                           |
| Xa83I | All | Cellulitis of elbow                        |
| Xa83m | All | Abscess of elbow                           |
| Xa83W | All | Abscess of foot                            |
| Xa85W | All | Loin abscess                               |
| Xa86C | All | Cellulitis of abdominal wall               |
| Xa89z | All | Boil of lower limb                         |
| Xa8A1 | All | Carbuncle of upper limb                    |
| Xa8A4 | All | Carbuncle of lower limb                    |
| Xa97f | All | Anogenital human papilloma virus infection |
| Xa97i | All | Early yaws skin lesion                     |
| Xa97k | All | Tinea pedis                                |
| Xa97I | All | Ringworm of body                           |
| Xa9CU | All | Pilonidal abscess                          |
| Xa9CY | All | Hidradenitis suppurativa                   |
| Xa9zj | All | Abscess of ankle                           |
| Xaa9L | All | Recurrent genital warts                    |

|       |     |                                            |
|-------|-----|--------------------------------------------|
| XaB64 | All | Cellulitis - anus or rectum                |
| XaB65 | All | Perianal cellulitis                        |
| XaBDy | All | Cellulitis of axilla                       |
| XaBEE | All | Cellulitis of neck                         |
| XaBj5 | All | Abscess of back                            |
| XaBkZ | All | Groin abscess                              |
| XaBmh | All | Cellulitis of skin of back                 |
| XaBsM | All | Infection of big toe                       |
| XaBXe | All | Abdominal wall abscess                     |
| XaBXh | All | Abscess of big toe                         |
| XaBXi | All | Abscess of cheek                           |
| XaBXj | All | Abscess of thigh                           |
| XaBXk | All | Abscess of forehead                        |
| XaDbx | All | Toxocara larva migrans of skin             |
| XaEGL | All | Hand warts                                 |
| XaEJd | All | Prepatellar abscess                        |
| XaF8F | All | Preseptal cellulitis                       |
| XaFCr | All | Cellulitis of thigh                        |
| XaI8d | All | Abscess of lower limb                      |
| XaI8e | All | Abscess of upper limb                      |
| XaINT | All | Blind boil                                 |
| XaLWv | All | Nasal furuncle                             |
| XaMgL | All | [X]Vulval warts                            |
| XaMgM | All | [X]Perineal warts                          |
| XaR2I | All | Recurrent cellulitis                       |
| XaY4a | All | Pustular eczema                            |
| XaY4o | All | Infected eczema                            |
| XaY4Z | All | Infective eczematoid dermatitis            |
| XaYO5 | All | Cellulitis of thumb                        |
| XaYOq | All | Bullous impetigo                           |
| XaYRx | All | Bullous staphylococcal impetigo            |
| XEOaH | All | Angular cheilitis                          |
| XEOeV | All | Carbuncle of vulva                         |
| XEORS | All | Human papilloma virus infection of skin    |
| XEORT | All | Genital warts                              |
| XEORU | All | Perianal warts                             |
| XEOS1 | All | Chancroid                                  |
| XEOS2 | All | Donovanosis                                |
| XEOS7 | All | Yaws hyperkeratosis                        |
| XEOS9 | All | Dermatophytosis                            |
| XEOSA | All | Dermatophytosis of scalp or beard          |
| XEOSC | All | Dermatophytosis of groin and perianal area |

|    |       |     |                                                                     |
|----|-------|-----|---------------------------------------------------------------------|
| 1  |       |     |                                                                     |
| 2  |       |     |                                                                     |
| 3  |       |     |                                                                     |
| 4  |       |     |                                                                     |
| 5  |       |     |                                                                     |
| 6  |       |     |                                                                     |
| 7  |       |     |                                                                     |
| 8  |       |     |                                                                     |
| 9  |       |     |                                                                     |
| 10 |       |     |                                                                     |
| 11 |       |     |                                                                     |
| 12 |       |     |                                                                     |
| 13 |       |     |                                                                     |
| 14 |       |     |                                                                     |
| 15 |       |     |                                                                     |
| 16 |       |     |                                                                     |
| 17 |       |     |                                                                     |
| 18 |       |     |                                                                     |
| 19 |       |     |                                                                     |
| 20 |       |     |                                                                     |
| 21 |       |     |                                                                     |
| 22 |       |     |                                                                     |
| 23 |       |     |                                                                     |
| 24 |       |     |                                                                     |
| 25 |       |     |                                                                     |
| 26 |       |     |                                                                     |
| 27 |       |     |                                                                     |
| 28 |       |     |                                                                     |
| 29 |       |     |                                                                     |
| 30 |       |     |                                                                     |
| 31 |       |     |                                                                     |
| 32 |       |     |                                                                     |
| 33 |       |     |                                                                     |
| 34 |       |     |                                                                     |
| 35 |       |     |                                                                     |
| 36 |       |     |                                                                     |
| 37 |       |     |                                                                     |
| 38 |       |     |                                                                     |
| 39 |       |     |                                                                     |
| 40 |       |     |                                                                     |
| 41 |       |     |                                                                     |
| 42 |       |     |                                                                     |
| 43 |       |     |                                                                     |
| 44 |       |     |                                                                     |
| 45 |       |     |                                                                     |
| 46 |       |     |                                                                     |
| 47 |       |     |                                                                     |
| 48 |       |     |                                                                     |
| 49 |       |     |                                                                     |
| 50 |       |     |                                                                     |
| 51 |       |     |                                                                     |
| 52 |       |     |                                                                     |
| 53 |       |     |                                                                     |
| 54 |       |     |                                                                     |
| 55 |       |     |                                                                     |
| 56 |       |     |                                                                     |
| 57 |       |     |                                                                     |
| 58 |       |     |                                                                     |
| 59 |       |     |                                                                     |
| 60 |       |     |                                                                     |
|    | XE0SD | All | Dermatophytosis of the body                                         |
|    | XE0Se | All | Scabies                                                             |
|    | XE0SE | All | Deep seated dermatophytosis                                         |
|    | XE0SF | All | Tinea nigra                                                         |
|    | XE0Sg | All | Other arthropod infestation                                         |
|    | XE0SK | All | Candida intertrigo                                                  |
|    | XE0SP | All | Eumycetoma                                                          |
|    | XE0TC | All | (Actinomycosis (& [infections]) or (erythrasma)                     |
|    | XE0Te | All | Viral warts (& [condyloma acuminatum])                              |
|    | XE0Tg | All | Other viral warts                                                   |
|    | XE0UC | All | (Tinea: [groin/perianal] or [cruris]) or (Dhobie itch)              |
|    | XE16h | All | Abscess of eyelid                                                   |
|    | XE1Aa | All | Cellulitis and abscess of leg                                       |
|    | XE1Ab | All | Cellulitis and abscess of foot excluding toe                        |
|    | XE1Ac | All | Cellulitis and abscess of head unspecified                          |
|    | XE1Ad | All | Acute lymphadenitis                                                 |
|    | XE1Ae | All | Pilonidal cyst with no abscess                                      |
|    | XE1Ag | All | Other specified local infection of skin or subcutaneous tissue      |
|    | XE1Ai | All | Other specified local infection of skin and subcutaneous tissue NOS |
|    | XE1Aj | All | Local infection skin/subcut tissue NOS                              |
|    | XE1Ak | All | [X]Cellulitis of finger and toe                                     |
|    | XE1Al | All | Skin and subcut tissue infection NOS                                |
|    | XE1AO | All | Boil of upper limb                                                  |
|    | XE1AP | All | Boil NOS                                                            |
|    | XE1AQ | All | Finger pulp abscess                                                 |
|    | XE1AR | All | Paronychia of finger                                                |
|    | XE1AS | All | Cellulitis and abscess of toe NOS                                   |
|    | XE1AT | All | Cellulitis and abscess of digit NOS                                 |
|    | XE1AU | All | Other cellulitis and abscess                                        |
|    | XE1AV | All | Cellulitis and abscess of cheek (external)                          |
|    | XE1AW | All | Cellulitis and abscess of nose (external)                           |
|    | XE1AX | All | Cellulitis and abscess of neck                                      |
|    | XE1AY | All | Cellulitis and abscess of hand excluding digits                     |
|    | XE1AZ | All | Cellulitis and abscess of hand unspecified                          |
|    | XE1Bc | All | (Carbuncle) &/or (boil) or (furuncle)                               |
|    | XE1Be | All | Boil: (face) or (external auditory) or (external ear)               |
|    | XE1Bg | All | (Boil - upper arm and forearm) or (axillary furunculosis)           |
|    | XE1Bi | All | (Cellulitis &/or abscess finger/toe) or (felon - whitlow)           |
|    | XE1BJ | All | Superficial folliculitis                                            |
|    | XE1Bk | All | (Cellulitis - finger-paronychia) or (paronychia)                    |
|    | XE1Bm | All | (Cellulitis/abscess: [NOS] or [other]) or (abscess NOS)             |
|    | XE1Bo | All | (Cellulitis/abscess - face) or (cellulitis - lips)                  |

|       |     |                                                                       |
|-------|-----|-----------------------------------------------------------------------|
| XE1Bq | All | Cellulitis -hand (& -excl. finger)                                    |
| XE1Bs | All | Cellulitis (&/or abscess): [buttock] or [perirectal]                  |
| XE1Bu | All | Cellulitis - foot (& - excl. toe)                                     |
| XE1Bw | All | (Impetigo) or (pemphigus neonatorum)                                  |
| XE1By | All | (Pilonidal: [sinus &/or cyst] or [abscess]) or (dimple - parasacral)  |
| XE1C0 | All | (Skin infection, localised NOS) or (pyoderma) or (pyogenic granuloma) |
| XE1C2 | All | (Skin infections NOS) or (perleche)                                   |
| XE1Cq | All | Folliculitis                                                          |
| XE2RI | All | Toe: [cellulitis] or [paronychia]                                     |
| XE2uC | All | Tuberculosis of skin and subcutaneous tissue                          |
| XE2uM | All | Dermatophytosis of foot                                               |
| XE2v1 | All | Multiple yaws papillomata                                             |
| XE2xh | All | Phthiriasis pubis                                                     |
| XM0pU | All | Tinea kerion of beard                                                 |
| XM0tp | All | Cellulitis of hand                                                    |
| XM0tr | All | Cellulitis of foot                                                    |
| XM1PT | All | Superficial bacterial infection of skin                               |
| XM1R0 | All | Acute abscess lymph node                                              |
| XSBpB | All | Abscess of hand                                                       |

**Supplementary table S5.7.** The case definitions for included Urinary tract infection.

| <b>Urinary tract infection</b> |                |                                             |
|--------------------------------|----------------|---------------------------------------------|
| <b>Read V2 Code</b>            | <b>Term ID</b> | <b>Description</b>                          |
| K15..                          | All            | Cystitis                                    |
| K150.                          | All            | Acute cystitis                              |
| K151.                          | All            | Chronic interstitial cystitis               |
| K1510                          | All            | Hunner's ulcer                              |
| K1511                          | All            | Panmural fibrosis of bladder                |
| K1512                          | All            | Submucous cystitis                          |
| K151z                          | All            | Chronic interstitial cystitis NOS           |
| K152.                          | All            | Other chronic cystitis                      |
| K1520                          | All            | Subacute cystitis                           |
| K152y                          | All            | Chronic cystitis unspecified                |
| K152z                          | All            | Other chronic cystitis NOS                  |
| K153.                          | All            | Trigonitis                                  |
| K1530                          | All            | Acute trigonitis                            |
| K1531                          | All            | Chronic trigonitis                          |
| K1532                          | All            | Urethrotigonitis                            |
| K153z                          | All            | Trigonitis NOS                              |
| K154.                          | All            | Cystitis in diseases EC                     |
| K1540                          | All            | Cystitis in actinomycosis                   |
| K1541                          | All            | Cystitis in amoebiasis                      |
| K1542                          | All            | Cystitis in bilharziasis                    |
| K1543                          | All            | Cystitis in echinococcus infestation        |
| K1544                          | All            | Cystitis in diphtheria                      |
| K1545                          | All            | Cystitis in gonorrhoea                      |
| K1546                          | All            | Cystitis in moniliasis                      |
| K1547                          | All            | Cystitis in trichomoniasis                  |
| K1548                          | All            | Cystitis in tuberculosis                    |
| K154z                          | All            | Cystitis in diseases EC NOS                 |
| K155.                          | All            | Recurrent cystitis                          |
| K15y.                          | All            | Other specified cystitis                    |
| K15y0                          | All            | Cystitis cystica                            |
| K15y1                          | All            | Irradiation cystitis                        |
| K15y2                          | All            | Abscess of bladder                          |
| K15y3                          | All            | Malakoplakia of bladder                     |
| K15yz                          | All            | Other cystitis NOS                          |
| K15z.                          | All            | Cystitis NOS                                |
| K190.                          | All            | Urinary tract infection, site not specified |
| K1900                          | All            | Bacteriuria, site not specified             |
| K1901                          | All            | Pyuria, site not specified                  |

|                |         |                                                 |
|----------------|---------|-------------------------------------------------|
| K1902          | All     | Post operative urinary tract infection          |
| K1903          | All     | Recurrent urinary tract infection               |
| K1904          | All     | Chronic urinary tract infection                 |
| K1905          | All     | Urinary tract infection                         |
| K1906          | All     | Urosepsis                                       |
| K190X          | All     | Persistent proteinuria, unspecified             |
| K190z          | All     | Urinary tract infection, site not specified NOS |
| Read CTV3 Code | Term ID | Description                                     |
| A32y3          | All     | Diphtheritic cystitis                           |
| A9811          | All     | Acute gonococcal cystitis                       |
| A9831          | All     | Chronic gonococcal cystitis                     |
| K15..          | All     | Inflammation of bladder                         |
| K150.          | All     | NULL                                            |
| K151.          | All     | Chronic interstitial cystitis                   |
| K1510          | All     | Hunner's ulcer                                  |
| K1511          | All     | Panmural fibrosis of bladder                    |
| K1512          | All     | Submucous cystitis                              |
| K151z          | All     | Chronic interstitial cystitis NOS               |
| K152.          | All     | Other chronic cystitis                          |
| K1520          | All     | Subacute cystitis                               |
| K152y          | All     | Chronic cystitis unspecified                    |
| K152z          | All     | Other chronic cystitis NOS                      |
| K153.          | All     | (Trigonitis) or (follicular cystitis)           |
| K1530          | All     | Acute trigonitis                                |
| K1531          | All     | Chronic trigonitis                              |
| K1532          | All     | Urethrotrigonitis                               |
| K153z          | All     | Trigonitis NOS                                  |
| K154.          | All     | Cystitis in diseases EC                         |
| K1540          | All     | Actinomycotic cystitis                          |
| K1541          | All     | Amoebic cystitis                                |
| K1542          | All     | Schistosomiasis of bladder                      |
| K1543          | All     | Echinococcal cystitis                           |
| K1544          | All     | NULL                                            |
| K1545          | All     | Gonococcal cystitis                             |
| K1546          | All     | Monilial cystitis                               |
| K1547          | All     | Trichomonal cystitis                            |
| K1548          | All     | Tuberculous cystitis                            |
| K154z          | All     | Cystitis in diseases EC NOS                     |
| K155.          | All     | Recurrent cystitis                              |
| K15y.          | All     | Other specified cystitis                        |
| K15y0          | All     | Cystitis cystica                                |
| K15y1          | All     | Irradiation cystitis                            |



|       |     |                                                              |
|-------|-----|--------------------------------------------------------------|
| K15y2 | All | Pyocystis                                                    |
| K15y3 | All | NULL                                                         |
| K15yz | All | Other cystitis NOS                                           |
| K15z. | All | Cystitis NOS                                                 |
| K1632 | All | Diverticulitis of bladder                                    |
| K190. | All | Urinary tract infection: [site not specified] or [recurrent] |
| K1900 | All | Bacteriuria: [site not specified] or [asymptomatic]          |
| K1901 | All | Pyuria                                                       |
| K1902 | All | Postoperative urinary tract infection                        |
| K1903 | All | Recurrent urinary tract infection                            |
| K1904 | All | Chronic urinary tract infection                              |
| K1905 | All | NULL                                                         |
| K1906 | All | NULL                                                         |
| K190X | All | NULL                                                         |
| K190z | All | Urinary tract infection, site not specified NOS              |
| Kyu50 | All | [X]Other chronic cystitis                                    |
| Kyu51 | All | [X]Other cystitis                                            |
| X30Na | All | Recurrent cystitis - culture-negative                        |
| X30Nb | All | Chronic cystitis - culture negative                          |
| X30Nc | All | Chronic nonspecific cystitis                                 |
| X30Nd | All | Acute radiation cystitis                                     |
| X30Ne | All | Chronic radiation cystitis                                   |
| X30Nf | All | Chemical cystitis                                            |
| X30Ng | All | Leukoplakia of bladder                                       |
| X30Nh | All | Malakoplakia of bladder                                      |
| X30NV | All | Infective cystitis                                           |
| X30NX | All | Chronic infective cystitis                                   |
| X30NY | All | Non-infective cystitis                                       |
| X30NZ | All | Acute cystitis - culture-negative                            |
| X30Pa | All | Recurrent infective cystitis                                 |
| X30PZ | All | Acute culture positive cystitis                              |
| Xa0t3 | All | Amyloid of bladder                                           |
| Xa8EJ | All | Acute cystitis                                               |
| Xa8EK | All | Chronic cystitis                                             |
| XaA05 | All | Bullous cystitis                                             |
| XaB66 | All | Acute infective cystitis                                     |
| XaY6b | All | Follicular cystitis                                          |
| XE0dq | All | Trigonitis                                                   |
| XE0fX | All | Acute cystitis (& [recurrent])                               |
| XE0fZ | All | (Cystitis NOS) or (trigonitis)                               |
| XM0sZ | All | Acute recurrent cystitis                                     |
| XM10v | All | Infected diverticulum of bladder                             |

1  
2  
3  
4  
5  
6  
7  
8  
9  
10  
11  
12  
13  
14  
15  
16  
17  
18  
19  
20  
21  
22  
23  
24  
25  
26  
27  
28  
29  
30  
31  
32  
33  
34  
35  
36  
37  
38  
39  
40  
41  
42  
43  
44  
45  
46  
47  
48  
49  
50  
51  
52  
53  
54  
55  
56  
57  
58  
59  
60

|       |     |                       |
|-------|-----|-----------------------|
| XM1Ox | All | Cystitis of pregnancy |
| XM1Us | All | Sterile pyuria        |

For peer review only

**Supplementary table S5.8.** The case definitions for included Genital infections.

| Genital infections |         |                                          |
|--------------------|---------|------------------------------------------|
| Read V2 Code       | Term ID | Description                              |
| AB21.              | All     | Candidal vulvovaginitis                  |
| AB210              | All     | Candidiasis of vulva                     |
| AB211              | All     | Candidiasis of vagina                    |
| AB21z              | All     | Candidal vulvovaginitis NOS              |
| AB22.              | All     | Other urogenital candidiasis             |
| AB220              | All     | Candidal balanitis                       |
| AB221              | All     | Perianal candidiasis                     |
| AB22z              | All     | Other urogenital candida NOS             |
| K17..              | All     | Urethritis due to non venereal causes    |
| K170.              | All     | Urethral and periurethral abscess        |
| K1700              | All     | Urethral abscess unspecified             |
| K1701              | All     | Bulbourethral gland abscess              |
| K1702              | All     | Urethral gland abscess                   |
| K1703              | All     | Periurethral cellulitis                  |
| K1704              | All     | Periurethral abscess                     |
| K170z              | All     | Urethral abscess NOS                     |
| K172.              | All     | Candidal urethritis                      |
| K17y2              | All     | Skene's glands adenitis                  |
| K17y3              | All     | Cowperitis                               |
| K17y4              | All     | Urethral meatitis                        |
| K17y6              | All     | Verumontanitis                           |
| K17y7              | All     | Utriculus masculinus                     |
| K17yz              | All     | Other urethritis NOS                     |
| K17z.              | All     | Urethritis due to non venereal cause NOS |
| Read CTV3 Code     | Term ID | Description                              |
| AB21.              | All     | Candidal vulvovaginitis                  |
| XE0SH              | All     | Candidal vulvovaginitis NOS              |
| X407o              | All     | Streptococcal vulvovaginitis             |
| X407r              | All     | Chlamydial vulvovaginitis                |
| K4212              | All     | Vulvovaginitis unspecified               |
| K4216              | All     | Vulvovaginitis in diseases EC            |
| Xa16P              | All     | Infective vulvitis                       |
| X4087              | All     | Vulval amoebiasis                        |
| AB210              | All     | Candidiasis of vulva                     |
| X407h              | All     | Infective vaginitis                      |
| AB211              | All     | Vaginal candidiasis                      |
| Xa0Er              | All     | Trichomonal vaginitis                    |
| X407i              | All     | Bacterial vaginosis                      |
| X4080              | All     | Vaginal vault infection                  |
| AB22.              | All     | Other urogenital candidiasis             |
| AB22z              | All     | Other urogenital candida NOS             |

|       |     |                                     |
|-------|-----|-------------------------------------|
| XaBjl | All | Infective balanitis                 |
| X4007 | All | Bacterial balanitis                 |
| X4008 | All | Anaerobic balanitis                 |
| X400A | All | Mycoplasma balanitis                |
| XE0SI | All | Candidal balanitis                  |
| A05y1 | All | Amoebic balanitis                   |
| X70Qk | All | Anogenital candidiasis              |
| XE0SJ | All | Perianal candidiasis                |
| X70Qo | All | Anal candidiasis                    |
| X70Qj | All | Candida infection of genital region |
| X407N | All | Candidiasis of cervix               |
| X70Qn | All | Penile candidiasis                  |
| XE0SI | All | Candidal balanitis                  |
| X30Oy | All | Infective urethritis                |
| XE0dt | All | Non-venereal urethritis             |
| X30P3 | All | Tuberculous urethritis              |
| X30P6 | All | Urethral abscess                    |
| K1700 | All | Urethral abscess unspecified        |
| K170z | All | Urethral abscess NOS                |
| K17y2 | All | Skene's glands adenitis             |
| K17y3 | All | Cowperitis                          |
| K17y4 | All | Urethral meatitis                   |
| X30PD | All | Male accessory gland infection      |
| K17y6 | All | Verumontanitis                      |
| K17yz | All | Other urethritis NOS                |
| K1703 | All | Periurethral cellulitis             |
| K1704 | All | Periurethral abscess                |

**Supplementary table S5.9.** The case definitions for included Gastrointestinal infection.

| Gastrointestinal infection |         |                                               |
|----------------------------|---------|-----------------------------------------------|
| Read V2 Code               | Term ID | Description                                   |
| 19G..                      | All     | Diarrhoea and vomiting                        |
| 1J8..                      | All     | Suspected food poisoning                      |
| A0...                      | All     | Intestinal infectious diseases                |
| A00..                      | All     | Cholera                                       |
| A000.                      | All     | Cholera - <i>Vibrio cholerae</i>              |
| A001.                      | All     | Cholera - <i>Vibrio cholerae</i> El Tor       |
| A00z.                      | All     | Cholera NOS                                   |
| A01..                      | All     | Typhoid and paratyphoid fevers                |
| A010.                      | All     | Typhoid fever                                 |
| A011.                      | All     | Paratyphoid fever A                           |
| A012.                      | All     | Paratyphoid fever B                           |
| A013.                      | All     | Paratyphoid fever C                           |
| A01z.                      | All     | Paratyphoid fever NOS                         |
| A02..                      | All     | Other salmonella infections                   |
| A020.                      | All     | <i>Salmonella</i> gastroenteritis             |
| A021.                      | All     | <i>Salmonella</i> septicaemia                 |
| A022.                      | All     | Localised salmonella infection                |
| A0220                      | All     | Local salmonella infection unspecified        |
| A0221                      | All     | <i>Salmonella</i> meningitis                  |
| A0222                      | All     | <i>Salmonella</i> pneumonia                   |
| A0223                      | All     | <i>Salmonella</i> arthritis                   |
| A0224                      | All     | <i>Salmonella</i> osteomyelitis               |
| A022z                      | All     | Other local salmonella infection              |
| A023.                      | All     | <i>Salmonella</i> sepsis                      |
| A02y.                      | All     | Other specified salmonella infection          |
| A02z.                      | All     | <i>Salmonella</i> infection NOS               |
| A03..                      | All     | Shigellosis                                   |
| A030.                      | All     | <i>Shigella dysenteriae</i> (group A)         |
| A031.                      | All     | <i>Shigella flexneri</i> (group B)            |
| A032.                      | All     | <i>Shigella boydii</i> (group C)              |
| A033.                      | All     | <i>Shigella sonnei</i> (group D)              |
| A03y.                      | All     | Other specified shigella infection            |
| A03z.                      | All     | Shigellosis NOS                               |
| A04..                      | All     | Other bacterial food poisoning                |
| A040.                      | All     | Staphylococcal food poisoning                 |
| A041.                      | All     | Botulism                                      |
| A042.                      | All     | <i>Clostridium perfringens</i> food poisoning |
| A043.                      | All     | Other clostridia causing food poisoning       |
| A044.                      | All     | <i>Vibrio parahaemolyticus</i> food poisoning |
| A04y.                      | All     | Other specified bacterial food poisoning      |

|       |     |                                                            |
|-------|-----|------------------------------------------------------------|
| A04y0 | All | Foodborne Bacillus cereus intoxication                     |
| A04z. | All | Food poisoning NOS                                         |
| A05.. | All | Amoebiasis                                                 |
| A050. | All | Acute amoebic dysentery                                    |
| A051. | All | Chronic intestinal amoebiasis                              |
| A052. | All | Amoebic nondysenteric colitis                              |
| A053. | All | Amoebic liver abscess                                      |
| A054. | All | Amoebic lung abscess                                       |
| A055. | All | Amoebic brain abscess                                      |
| A056. | All | Amoebic skin ulceration                                    |
| A05y. | All | Amoebic infection of other sites                           |
| A05y0 | All | Amoebic appendicitis                                       |
| A05y1 | All | Amoebic balanitis                                          |
| A05y2 | All | Amoeboma                                                   |
| A05yz | All | Amoebic infection of other sites NOS                       |
| A05z. | All | Amoebiasis NOS                                             |
| A06.. | All | Other protozoal intestinal diseases                        |
| A060. | All | Balantidiasis                                              |
| A061. | All | Giardiasis - Lambliasis                                    |
| A062. | All | Coccidiosis                                                |
| A063. | All | Intestinal trichomoniasis                                  |
| A064. | All | Cryptosporidiosis                                          |
| A06y. | All | Other specified protozoal intestinal diseases              |
| A06z. | All | Protozoal intestinal diseases NOS                          |
| A07.. | All | Intestinal infection due to other organisms                |
| A070. | All | Escherichia coli gastrointestinal tract infection          |
| A0700 | All | Enteropathogenic Escherichia coli infection                |
| A0701 | All | Enterotoxigenic Escherichia coli infection                 |
| A0702 | All | Enteroinvasive Escherichia coli infection                  |
| A0703 | All | Enterohaemorrhagic Escherichia coli infection              |
| A071. | All | Arizona paracolon gastrointestinal tract infection         |
| A072. | All | Aerobacter aerogenes gastrointestinal tract infection      |
| A073. | All | Proteus gastrointestinal tract infection                   |
| A0730 | All | Proteus mirabilis gastrointestinal tract infection         |
| A0731 | All | Proteus morganii gastrointestinal tract infection          |
| A073z | All | Proteus gastrointestinal tract infection NOS               |
| A074. | All | Other specified gastrointestinal tract bacterial infection |
| A0740 | All | Staphylococcal gastrointestinal tract infection            |
| A0741 | All | Pseudomonas gastrointestinal tract infection               |
| A0743 | All | Campylobacter gastrointestinal tract infection             |
| A0744 | All | Enteritis due to Yersinia enterocolitica                   |
| A0745 | All | Helicobacter pylori gastrointestinal tract infection       |
| A074y | All | Other specified other gastrointestinal infection           |
| A074z | All | Other specified gastrointestinal tract infections NOS      |
| A075. | All | Unspecified bacterial enteritis                            |

|       |     |                                                                       |
|-------|-----|-----------------------------------------------------------------------|
| A076. | All | Enteritis due to specified virus                                      |
| A0760 | All | Enteritis due to adenovirus                                           |
| A0761 | All | Enteritis due to enterovirus                                          |
| A0762 | All | Enteritis due to rotavirus                                            |
| A0763 | All | Enteritis due to norovirus                                            |
| A076z | All | Enteritis due to specified virus NOS                                  |
| A07y. | All | Gastrointestinal tract infection due to specified organism NEC        |
| A07y0 | All | Viral gastroenteritis                                                 |
| A07y1 | All | Infantile viral gastroenteritis                                       |
| A07z. | All | Gastrointestinal tract infection due to specified organism NOS        |
| A08.. | All | Ill-defined intestinal tract infections                               |
| A080. | All | Infectious colitis, enteritis and gastroenteritis                     |
| A0801 | All | Infectious colitis                                                    |
| A0802 | All | Infectious enteritis                                                  |
| A0803 | All | Infectious gastroenteritis                                            |
| A0804 | All | Catarrhal dysentery                                                   |
| A0805 | All | Haemorrhagic dysentery                                                |
| A080z | All | Infectious colitis, enteritis and gastroenteritis NOS                 |
| A081. | All | Colitis, enteritis and gastroenteritis presumed infectious            |
| A0810 | All | Colitis - presumed infectious origin                                  |
| A0811 | All | Enteritis - presumed infectious origin                                |
| A0812 | All | Gastroenteritis - presumed infectious origin                          |
| A081z | All | Colitis, enteritis and gastroenteritis presumed infectious origin NOS |
| A082. | All | Infectious diarrhoea                                                  |
| A0820 | All | Dysenteric diarrhoea                                                  |
| A0821 | All | Epidemic diarrhoea                                                    |
| A082z | All | Infectious diarrhoea NOS                                              |
| A083. | All | Diarrhoea of presumed infectious origin                               |
| A08z. | All | Ill defined gastrointestinal tract infections NOS                     |
| A0y.. | All | Other specified infectious diseases of intestinal tract               |
| A0z.. | All | Intestinal tract infectious disease NOS                               |
| A3Ay2 | All | Clostridium difficile infection                                       |
| A78y1 | All | Epidemic vomiting syndrome                                            |
| Ayu00 | All | [X]Cholera, unspecified                                               |
| Ayu04 | All | [X]Other shigellosis                                                  |
| Ayu05 | All | [X]Shigellosis, unspecified                                           |
| Ayu07 | All | [X]Bacterial intestinal infection, unspecified                        |
| Ayu0F | All | [X]Viral intestinal infection, unspecified                            |
| Ayu0H | All | [X]Diarrhoea and gastroenteritis of presumed infectious origin        |
| J43.. | All | Other non-infective inflammatory gastroenteritis and colitis          |
| J43z. | All | Other non-infective gastroenteritis and colitis NOS                   |



| Read CTV3 Code | Term ID | Description                                                                                  |
|----------------|---------|----------------------------------------------------------------------------------------------|
| 19G..          | All     | NULL                                                                                         |
| 1J8..          | All     | NULL                                                                                         |
| A0...          | All     | (Intestinal infectious diseases) or (food poisoning [& (bacterial)]) or (infective vomiting) |
| A00..          | All     | (Cholera) or (Vibrio cholerae)                                                               |
| A000.          | All     | Cholera - Vibrio cholerae                                                                    |
| A001.          | All     | Cholera - Vibrio cholerae O1 El Tor biotype                                                  |
| A00z.          | All     | Cholera NOS                                                                                  |
| A01..          | All     | Typhoid and paratyphoid fevers                                                               |
| A010.          | All     | Fever: [typhoid] or [enteric]                                                                |
| A011.          | All     | Paratyphoid A                                                                                |
| A012.          | All     | Paratyphoid B                                                                                |
| A013.          | All     | Paratyphoid C                                                                                |
| A01z.          | All     | Paratyphoid fever NOS                                                                        |
| A02..          | All     | Other salmonella infections                                                                  |
| A020.          | All     | Salmonellosis (& [gastroenteritis] or [food poisoning])                                      |
| A021.          | All     | Salmonella septicaemia                                                                       |
| A022.          | All     | Localised salmonella infection                                                               |
| A0220          | All     | Local salmonella infection unspecified                                                       |
| A0221          | All     | NULL                                                                                         |
| A0222          | All     | Salmonella pneumonia                                                                         |
| A0223          | All     | Salmonella arthritis                                                                         |
| A0224          | All     | Salmonella osteomyelitis                                                                     |
| A022z          | All     | Other local salmonella infection                                                             |
| A023.          | All     | NULL                                                                                         |
| A02y.          | All     | Other specified salmonella infection                                                         |
| A02z.          | All     | Salmonella infection NOS                                                                     |
| A03..          | All     | Shigellosis                                                                                  |
| A030.          | All     | (Shigella dysenteriae - group A) or (bacillary dysentery)                                    |
| A031.          | All     | Shigella flexneri (group B)                                                                  |
| A032.          | All     | Shigella boydii (group C)                                                                    |
| A033.          | All     | Shigella sonnei: [group D] or [bacillary dysentery]                                          |
| A03y.          | All     | Other specified shigella infection                                                           |
| A03z.          | All     | Shigellosis NOS                                                                              |
| A04..          | All     | Other bacterial food poisoning                                                               |
| A040.          | All     | Staphylococcal food poisoning                                                                |
| A041.          | All     | NULL                                                                                         |
| A042.          | All     | Clostridium perfringens food poisoning                                                       |
| A043.          | All     | Other Clostridia causing food poisoning                                                      |
| A044.          | All     | Vibrio parahaemolyticus food poisoning                                                       |
| A04y.          | All     | Other specified bacterial food poisoning                                                     |
| A04y0          | All     | NULL                                                                                         |
| A04z.          | All     | Food poisoning NOS                                                                           |
| A05..          | All     | Amoebiasis                                                                                   |

|       |     |                                                                                         |
|-------|-----|-----------------------------------------------------------------------------------------|
| A050. | All | Acute amoebic dysentery                                                                 |
| A051. | All | Chronic intestinal amoebiasis                                                           |
| A052. | All | Amoebic nondysenteric colitis                                                           |
| A053. | All | Amoebic liver abscess                                                                   |
| A054. | All | Amoebic lung abscess                                                                    |
| A055. | All | Amoebic brain abscess                                                                   |
| A056. | All | Amoebic ulcer of skin                                                                   |
| A05y. | All | Amoebic infection of other sites                                                        |
| A05y0 | All | Amoebic appendicitis                                                                    |
| A05y1 | All | Amoebic balanitis                                                                       |
| A05y2 | All | Amoeboma                                                                                |
| A05yz | All | Amoebic infection of other sites NOS                                                    |
| A05z. | All | Amoebiasis NOS                                                                          |
| A06.. | All | Other protozoal intestinal diseases                                                     |
| A060. | All | Balantidiasis                                                                           |
| A061. | All | Giardiasis: [lambliasis] or [colitis]                                                   |
| A062. | All | Coccidiosis (& [intestinal])                                                            |
| A063. | All | Trichomonas hominis infection                                                           |
| A064. | All | NULL                                                                                    |
| A06y. | All | Other specified protozoal intestinal diseases                                           |
| A06z. | All | Protozoal intestinal diseases NOS                                                       |
| A07.. | All | Intestinal infection due to other organisms                                             |
| A070. | All | Escherichia coli gastrointestinal tract infection                                       |
| A0700 | All | NULL                                                                                    |
| A0701 | All | NULL                                                                                    |
| A0702 | All | NULL                                                                                    |
| A0703 | All | NULL                                                                                    |
| A071. | All | Arizona paracolon gastrointestinal tract infection                                      |
| A072. | All | Aerobacter aerogenes gastrointestinal tract infection                                   |
| A073. | All | Proteus gastrointestinal tract infection                                                |
| A0730 | All | Proteus mirabilis gastrointestinal tract infection                                      |
| A0731 | All | Morganella morganii gastrointestinal tract infection                                    |
| A073z | All | Proteus gastrointestinal tract infection NOS                                            |
| A074. | All | Other specified gastrointestinal tract bacterial infection                              |
| A0740 | All | Staphylococcal: [GIT infection] or [diarrhoea] or [toxin diarrhoea]                     |
| A0741 | All | Pseudomonas: [GIT infection] or [pyocyanea diarrhoea]                                   |
| A0743 | All | (Campylobacter GIT infection (& [diarrhoea] or [enteritis]) or (helicobacter gastritis) |
| A0744 | All | NULL                                                                                    |
| A0745 | All | NULL                                                                                    |
| A074y | All | Other specified other gastrointestinal infection                                        |
| A074z | All | Other specified gastrointestinal tract infections NOS                                   |
| A075. | All | Unspecified bacterial enteritis                                                         |

|       |     |                                                                                     |
|-------|-----|-------------------------------------------------------------------------------------|
| A076. | All | (Specified virus enteritis) or (viral: [diarrhoea] or [vomiting])                   |
| A0760 | All | Enteritis due to adenovirus                                                         |
| A0761 | All | Enteritis due to enterovirus                                                        |
| A0762 | All | Enteritis due to rotavirus                                                          |
| A0763 | All | NULL                                                                                |
| A076z | All | Enteritis due to specified virus NOS                                                |
| A07y. | All | Gastrointestinal tract infection due to specified organism NEC                      |
| A07y0 | All | Viral gastroenteritis                                                               |
| A07y1 | All | NULL                                                                                |
| A07z. | All | Gastrointestinal tract infection due to specified organism NOS                      |
| A08.. | All | (Ill-defined GIT infections) or (gastric flu)                                       |
| A080. | All | Infectious colitis, enteritis and gastroenteritis                                   |
| A0801 | All | Infective colitis                                                                   |
| A0802 | All | Infective enteritis                                                                 |
| A0803 | All | Infectious gastroenteritis                                                          |
| A0804 | All | Catarrhal dysentery                                                                 |
| A0805 | All | Haemorrhagic dysentery                                                              |
| A080z | All | Infectious colitis, enteritis and gastroenteritis NOS                               |
| A081. | All | Colitis and enteritis (& [gastroenteritis]) presumed infectious                     |
| A0810 | All | Colitis - presumed infectious origin                                                |
| A0811 | All | Enteritis - presumed infectious origin                                              |
| A0812 | All | Gastroenteritis - presumed infectious origin                                        |
| A081z | All | Colitis, enteritis and gastroenteritis presumed infectious origin NOS               |
| A082. | All | Diarrhoea: [infectious] or [travellers]                                             |
| A0820 | All | Dysenteric diarrhoea                                                                |
| A0821 | All | (Epidemic diarrhoea) or (viral gastroenteritis)                                     |
| A082z | All | Infectious diarrhoea NOS                                                            |
| A083. | All | (Infectious diarrhoea: [presumed] or [? & vomiting]) or (infantile gastroenteritis) |
| A08z. | All | Ill-defined gastrointestinal tract infections NOS                                   |
| A0y.. | All | Other specified infectious diseases of intestinal tract                             |
| A0z.. | All | Intestinal tract infectious disease NOS                                             |
| A3Ay2 | All | Clostridium difficile infection                                                     |
| A78y1 | All | Epidemic vomiting syndrome                                                          |
| Ayu00 | All | [X]Cholera, unspecified                                                             |
| Ayu04 | All | [X]Other shigellosis                                                                |
| Ayu05 | All | [X]Shigellosis, unspecified                                                         |
| Ayu07 | All | [X]Bacterial intestinal infection, unspecified                                      |
| Ayu0F | All | [X]Viral intestinal infection, unspecified                                          |
| Ayu0H | All | [X]Diarrhoea and gastroenteritis of presumed infectious origin                      |

|       |     |                                                                                                       |
|-------|-----|-------------------------------------------------------------------------------------------------------|
| H24y6 | All | Typhoid pneumonia                                                                                     |
| J43.. | All | (Gastroenteriti) or (enterocolitis) or (other non-infective inflammatory gastroenteritis and colitis) |
| J43z. | All | (Chronic diarrhoea) or (other non-infective gastroenteritis and colitis NOS)                          |
| X301R | All | Helicobacter gastritis                                                                                |
| X303g | All | Colitis,enteritis ? infectious                                                                        |
| X303I | All | Amoebic colitis                                                                                       |
| X303n | All | Fulminant amoebic colitis                                                                             |
| X303q | All | Cytomegaloviral colitis                                                                               |
| X30Bc | All | Prototheca diarrhoea                                                                                  |
| X30Bd | All | Food poisoning                                                                                        |
| X30BN | All | Gastroenteritis                                                                                       |
| X30BP | All | Vomiting - infective                                                                                  |
| X30BR | All | Adenoviral gastroenteritis                                                                            |
| X30BS | All | Rotavirus gastroenteritis                                                                             |
| X30BT | All | Norwalk virus gastroenteritis                                                                         |
| X30BU | All | Small round structured virus gastroenteritis                                                          |
| X30BX | All | Dysentery                                                                                             |
| X70Ft | All | Infantile gastroenteritis                                                                             |
| X70Fv | All | Bacterial food poisoning                                                                              |
| X70Fw | All | Bacillus cereus food poisoning                                                                        |
| X70Ge | All | Asymptomatic amoebic infection                                                                        |
| X70Gf | All | Symptomatic non-invasive amoebic infection                                                            |
| X70Gg | All | Amoebic toxic megacolon                                                                               |
| X70Gi | All | Amoebic perianal ulceration                                                                           |
| X70GJ | All | Cholera - Vibrio cholerae O1 Classical biotype                                                        |
| X70GK | All | Cholera - non-O1 group vibrio                                                                         |
| X70GL | All | Cholera - O139 group Vibrio cholerae                                                                  |
| X70GN | All | Enterotoxigenic Escherichia coli gastrointestinal tract infection                                     |
| X70GO | All | Travellers' diarrhoea                                                                                 |
| X70Gp | All | Cryptosporidiosis                                                                                     |
| X70GP | All | Enteropathogenic Escherichia coli gastrointestinal tract infection                                    |
| X70GQ | All | Verotoxigenic Escherichia coli gastrointestinal tract infection                                       |
| X70GR | All | Enteroinvasive Escherichia coli gastrointestinal tract infection                                      |
| X70GS | All | Enteroadherent Escherichia coli gastrointestinal tract infection                                      |
| X70GZ | All | Yersinia enterocolitis                                                                                |
| X73Mv | All | Vibrio cholerae                                                                                       |
| Xa01t | All | Recurrent salmonella septicaemia                                                                      |
| Xa2Vc | All | Astrovirus gastroenteritis                                                                            |
| Xa2Vd | All | Calicivirus gastroenteritis                                                                           |

|       |     |                                                                                                      |
|-------|-----|------------------------------------------------------------------------------------------------------|
| Xa3dy | All | Specific gastrointestinal infectious disease                                                         |
| Xa8ES | All | Acute infective gastroenteritis                                                                      |
| Xa8I7 | All | Salmonella food poisoning                                                                            |
| Xa97W | All | Cholera - O1 group Vibrio cholerae                                                                   |
| Xa97X | All | Staphylococcus aureus food poisoning                                                                 |
| XaB5z | All | Enterocolitis                                                                                        |
| XaBE5 | All | Helicobacter pylori gastrointestinal tract infection                                                 |
| XaBLu | All | Infantile viral gastroenteritis                                                                      |
| XaDbT | All | Fungal gastroenteritis                                                                               |
| XalnX | All | Suspected food poisoning                                                                             |
| XaREr | All | Enteritis due to norovirus                                                                           |
| XaYaf | All | Sepsis due to Salmonella                                                                             |
| XE0aj | All | Other non-infective inflammatory gastroenteritis and colitis                                         |
| XE0an | All | Other non-infective gastroenteritis and colitis NOS                                                  |
| XE0Qc | All | Cholera                                                                                              |
| XE0Qd | All | Typhoid fever                                                                                        |
| XE0Qe | All | Salmonella gastroenteritis                                                                           |
| XE0Qf | All | Shigella dysenteriae (group A)                                                                       |
| XE0Qg | All | Shigella sonnei (group D)                                                                            |
| XE0Qi | All | Intestinal coccidiosis                                                                               |
| XE0Qj | All | Staphylococcal gastrointestinal tract infection                                                      |
| XE0Qk | All | Pseudomonas gastrointestinal tract infection                                                         |
| XE0Ql | All | Campylobacter gastrointestinal tract infection                                                       |
| XE0Qm | All | Enteritis due to specified virus                                                                     |
| XE0Qn | All | Ill-defined intestinal tract infections                                                              |
| XE0Qo | All | Colitis, enteritis and gastroenteritis presumed infectious                                           |
| XE0Qp | All | Epidemic diarrhoea                                                                                   |
| XE0Qq | All | Diarrhoea of presumed infectious origin                                                              |
| XE0Sm | All | (Intestinal infectious diseases) or (unspecified enteritis)                                          |
| XE0Ss | All | (Bacillary dysentery) or (shigellosis)                                                               |
| XE0Su | All | Giardiasis (& [colitis])                                                                             |
| XE0Sw | All | (OS GIT infections) or (botulism) or (Campylobacter enteritis)                                       |
| XE0Sy | All | Viral: [ill-defined GIT infections (& diarrhoea)] or [gastroenteritis]                               |
| XE0T0 | All | (Gastroenteritis (& [viral NOS])) or (vomiting: [viral] or [& diarrhoea infection]) or (gastric flu) |
| XE0T2 | All | Infectious: [intestinal disease NOS] or [diarrhoea NOS]                                              |
| XM0pJ | All | Bacterial gastroenteritis                                                                            |
| XM0pK | All | Bacillary dysentery                                                                                  |

Supplementary table S5.10. The case definitions for included Herpes simplex.

| Herpes simplex |         |                                                      |
|----------------|---------|------------------------------------------------------|
| Read V2 Code   | Term ID | Description                                          |
| A54..          | All     | Herpes simplex                                       |
| A540.          | All     | Eczema herpeticum - Kaposi's varicelliform eruption  |
| A541.          | All     | Genital herpes simplex                               |
| A5410          | All     | Genital herpes unspecified                           |
| A5411          | All     | Herpetic vulvovaginitis                              |
| A5412          | All     | Herpetic ulceration of vulva                         |
| A5413          | All     | Herpetic infection of penis                          |
| A5414          | All     | Herpesviral infection of perianal skin and rectum    |
| A5415          | All     | Anogenital herpesviral infection                     |
| A5416          | All     | Genital herpes simplex type 1                        |
| A5417          | All     | Genital herpes simplex type 2                        |
| A5418          | All     | Recurrent genital herpes simplex type 1              |
| A5419          | All     | Recurrent genital herpes simplex type 2              |
| A541z          | All     | Genital herpes simplex NOS                           |
| A542.          | All     | Herpetic gingivostomatitis                           |
| A543.          | All     | Herpetic meningoencephalitis                         |
| A544.          | All     | Ophthalmic herpes simplex                            |
| A5440          | All     | Unspecified ophthalmic herpes                        |
| A5441          | All     | Herpes simplex eyelid dermatitis                     |
| A5442          | All     | Herpes simplex dendritic keratitis                   |
| A5443          | All     | Herpes simplex disciform keratitis                   |
| A5444          | All     | Herpes simplex iridocyclitis                         |
| A5445          | All     | Herpes simplex ophthalmicus                          |
| A544z          | All     | Ophthalmic herpes simplex NOS                        |
| A545.          | All     | Herpes simplex septicaemia                           |
| A546.          | All     | Herpes simplex whitlow                               |
| A548.          | All     | [X] Herpes labialis                                  |
| A54x.          | All     | Herpes simplex with other specified complication     |
| A54x0          | All     | Visceral herpes simplex                              |
| A54x1          | All     | Herpes simplex meningitis                            |
| A54x2          | All     | Herpes simplex otitis externa                        |
| A54x3          | All     | Herpesviral vesicular dermatitis                     |
| A54x4          | All     | Herpes simplex pneumonia                             |
| A54xz          | All     | Herpes simplex with other specified complication NOS |
| A54y.          | All     | Herpes simplex with unspecified complication         |
| A54z.          | All     | Herpes simplex no complication NOS                   |
| Read CTV3 Code | Term ID | Description                                          |
| A54..          | All     | (Herpes simplex [& viral infection]) or (scumpox)    |
| A540.          | All     | Eczema herpeticum                                    |
| A541.          | All     | Genital herpes                                       |
| A5410          | All     | Genital herpes unspecified (& [simplex group])       |

|    |       |     |                                                              |
|----|-------|-----|--------------------------------------------------------------|
| 1  |       |     |                                                              |
| 2  |       |     |                                                              |
| 3  |       |     |                                                              |
| 4  | A5411 | All | Herpetic vulvovaginitis                                      |
| 5  | A5412 | All | Herpetic ulceration of vulva                                 |
| 6  | A5413 | All | Herpetic infection of penis                                  |
| 7  | A5414 | All | Herpesviral infection of perianal skin and rectum            |
| 8  | A5415 | All | Anogenital herpesviral infection                             |
| 9  | A5416 | All | NULL                                                         |
| 10 | A5417 | All | NULL                                                         |
| 11 | A5418 | All | NULL                                                         |
| 12 | A5419 | All | NULL                                                         |
| 13 | A541z | All | Genital herpes simplex NOS                                   |
| 14 | A542. | All | Herpetic: [gingivostomatitis] or [cold sore] or [stomatitis] |
| 15 | A543. | All | (Herpetic meningoencephalitis) or (Simian B disease)         |
| 16 | A544. | All | Ophthalmic herpes simplex                                    |
| 17 | A5440 | All | Unspecified ophthalmic herpes (& [simplex group])            |
| 18 | A5441 | All | Herpes simplex eyelid dermatitis                             |
| 19 | A5442 | All | Herpes simplex dendritic keratitis                           |
| 20 | A5443 | All | Herpes simplex disciform keratitis                           |
| 21 | A5444 | All | Herpes simplex iridocyclitis                                 |
| 22 | A5445 | All | NULL                                                         |
| 23 | A544z | All | Ophthalmic herpes simplex NOS                                |
| 24 | A545. | All | Herpes simplex septicaemia                                   |
| 25 | A546. | All | Herpes simplex whitlow                                       |
| 26 | A548. | All | NULL                                                         |
| 27 | A54x. | All | Herpes simplex with other specified complication             |
| 28 | A54x0 | All | Visceral herpes simplex                                      |
| 29 | A54x1 | All | NULL                                                         |
| 30 | A54x2 | All | NULL                                                         |
| 31 | A54x3 | All | Herpesviral vesicular dermatitis                             |
| 32 | A54x4 | All | NULL                                                         |
| 33 | A54xz | All | Herpes simplex with other specified complication NOS         |
| 34 | A54y. | All | Herpes simplex with unspecified complication                 |
| 35 | A54z. | All | Herpes: [simplex, no complication NOS] or [labialis]         |
| 36 | Ayu4G | All | [X]Anogenital herpes viral infection, unspecified            |
| 37 | F5015 | All | Herpes simplex otitis externa                                |
| 38 | X100g | All | Herpes simplex pneumonia                                     |
| 39 | X70Ja | All | Herpes simiae infection                                      |
| 40 | X70JU | All | Primary anogenital herpes                                    |
| 41 | X70JV | All | Recurrent anogenital herpes                                  |
| 42 | XaPEC | All | Genital herpes simplex type 1 infection                      |
| 43 | XaPED | All | Genital herpes simplex type 2 infection                      |
| 44 | XaPER | All | Recurrent genital herpes simplex type 1 infection            |
| 45 | XaPES | All | Recurrent genital herpes simplex type 2 infection            |
| 46 | XEORB | All | Herpes simplex infection                                     |
| 47 | XEORC | All | Herpetic gingivostomatitis                                   |
| 48 | XEORD | All | Herpes simplex encephalitis                                  |
| 49 |       |     |                                                              |
| 50 |       |     |                                                              |
| 51 |       |     |                                                              |
| 52 |       |     |                                                              |
| 53 |       |     |                                                              |
| 54 |       |     |                                                              |
| 55 |       |     |                                                              |
| 56 |       |     |                                                              |
| 57 |       |     |                                                              |
| 58 |       |     |                                                              |
| 59 |       |     |                                                              |
| 60 |       |     |                                                              |

|       |     |                                                         |
|-------|-----|---------------------------------------------------------|
| XE0RE | All | Herpes simplex no complication NOS                      |
| XE0TO | All | (Herpes simplex (& [type 1] or [type 2])) or (scrumpox) |
| XE2vG | All | Genital herpes unspecified                              |
| XE2vH | All | Unspecified ophthalmic herpes                           |
| XM02r | All | Herpes labialis                                         |

For peer review only



Supplementary table S5.11. The case definitions for included Herpes zoster.

| <b>Herpes zoster</b>  |                |                                                                         |
|-----------------------|----------------|-------------------------------------------------------------------------|
| <b>Read V2 Code</b>   | <b>Term ID</b> | <b>Description</b>                                                      |
| A53..                 | All            | Herpes zoster                                                           |
| A530.                 | All            | Herpes zoster with meningitis                                           |
| A531.                 | All            | Herpes zoster with other central nervous system complication            |
| A5310                 | All            | Herpes zoster with other central nervous system complications           |
| A5311                 | All            | Geniculate herpes zoster                                                |
| A5312                 | All            | Postherpetic trigeminal neuralgia                                       |
| A5313                 | All            | Postherpetic polyneuropathy                                             |
| A5314                 | All            | Zoster encephalitis                                                     |
| A5315                 | All            | Postzoster neuralgia                                                    |
| A531z                 | All            | Herpes zoster with other central nervous system complication NOS        |
| A532.                 | All            | Herpes zoster with ophthalmic complication                              |
| A5320                 | All            | Herpes zoster with dermatitis of eyelid                                 |
| A5321                 | All            | Herpes zoster with keratoconjunctivitis                                 |
| A5322                 | All            | Herpes zoster iridocyclitis                                             |
| A5323                 | All            | Ophthalmic herpes zoster infection                                      |
| A5324                 | All            | Herpes zoster ophthalmicus                                              |
| A532z                 | All            | Herpes zoster with other ophthalmic complication                        |
| A53x.                 | All            | Herpes zoster with other specified complication                         |
| A53x0                 | All            | Herpes zoster otitis externa                                            |
| A53x1                 | All            | Disseminated zoster                                                     |
| A53xz                 | All            | Herpes zoster with other specified complication NOS                     |
| A53y.                 | All            | Herpes zoster with unspecified complication                             |
| A53z.                 | All            | Herpes zoster NOS                                                       |
| <b>Read CTV3 Code</b> | <b>Term ID</b> | <b>Description</b>                                                      |
| A53..                 | All            | Herpes zoster [organism] or [infection - shingles]                      |
| A530.                 | All            | NULL                                                                    |
| A531.                 | All            | (Herpes zoster with other CNS complication) or (postherpetic neuralgia) |
| A5310                 | All            | NULL                                                                    |
| A5311                 | All            | (Geniculate herpes zoster) or (Ramsey Hunt syndrome)                    |
| A5312                 | All            | NULL                                                                    |
| A5313                 | All            | Post-herpetic polyneuropathy                                            |
| A5314                 | All            | NULL                                                                    |
| A5315                 | All            | NULL                                                                    |
| A531z                 | All            | Herpes zoster with other central nervous system complication NOS        |
| A532.                 | All            | Herpes zoster with ophthalmic complication                              |
| A5320                 | All            | Herpes zoster with dermatitis of eyelid                                 |
| A5321                 | All            | Herpes zoster with keratoconjunctivitis                                 |
| A5322                 | All            | Herpes zoster iridocyclitis                                             |
| A5323                 | All            | Ophthalmic herpes zoster infection                                      |
| A5324                 | All            | NULL                                                                    |

|       |     |                                                     |
|-------|-----|-----------------------------------------------------|
| A53z  | All | Herpes zoster with other ophthalmic complication    |
| A53x. | All | Herpes zoster with other specified complication     |
| A53x0 | All | NULL                                                |
| A53x1 | All | Disseminated zoster                                 |
| A53xz | All | Herpes zoster with other specified complication NOS |
| A53y. | All | Herpes zoster with unspecified complication         |
| A53z. | All | Herpes zoster NOS                                   |

For peer review only

Supplementary table S5.12. The case definitions for included Meningitis.

| <b>Herpes zoster</b> |                |                                                            |
|----------------------|----------------|------------------------------------------------------------|
| <b>Read V2 Code</b>  | <b>Term ID</b> | <b>Description</b>                                         |
| F00..                | All            | Bacterial meningitis                                       |
| F000.                | All            | Haemophilus meningitis                                     |
| F001.                | All            | Pneumococcal meningitis                                    |
| F002.                | All            | Streptococcal meningitis                                   |
| F003.                | All            | Staphylococcal meningitis                                  |
| F004.                | All            | Meningitis - tuberculous                                   |
| F005.                | All            | Meningitis - meningococcal                                 |
| F007.                | All            | Meningitis in other bacterial disease classified elsewhere |
| F0070                | All            | Meningitis due to gonococcus                               |
| F0071                | All            | Meningitis due to listeriosis                              |
| F0072                | All            | Meningitis due to neurosyphilis                            |
| F0073                | All            | Meningitis due to salmonella                               |
| F0074                | All            | Meningitis due to congenital syphilis                      |
| F0075                | All            | Meningitis due to secondary syphilis                       |
| F0076                | All            | Meningitis due to typhoid fever                            |
| F0077                | All            | Meningitis due to actinomycosis                            |
| F0078                | All            | Meningitis due to pertussis                                |
| F007z                | All            | Unspecified meningitis in bacterial disease EC             |
| F00y.                | All            | Other specified bacterial meningitis                       |
| F00y0                | All            | Meningitis due to aerobacter aerogenes                     |
| F00y1                | All            | Meningitis due to bacillus pyocyaneus                      |
| F00y2                | All            | Meningitis due to escherichia coli                         |
| F00y3                | All            | Meningitis due to Friedlander bacillus                     |
| F00y4                | All            | Meningitis due to klebsiella pneumoniae                    |
| F00y5                | All            | Meningitis due to proteus morgani                          |
| F00y6                | All            | Meningitis due to pseudomonas                              |
| F00yz                | All            | Other specified bacterial meningitis NOS                   |
| F00z.                | All            | Bacterial meningitis NOS                                   |
| F01..                | All            | Meningitis due to other organisms                          |
| F010.                | All            | Meningitis due to fungal organisms                         |
| F0100                | All            | Meningitis due to cryptococcus                             |
| F010z                | All            | Other fungal meningitis                                    |
| F011.                | All            | Meningitis due to viral organisms EC                       |
| F0110                | All            | Meningitis due to coxsackie virus                          |
| F0111                | All            | Meningitis due to ECHO virus                               |
| F0112                | All            | Meningitis due to herpes zoster virus                      |
| F0113                | All            | Meningitis due to herpes simplex virus                     |
| F0114                | All            | Meningitis due to mumps virus                              |
| F0115                | All            | Meningitis due to lymphocytic choriomeningitis virus       |
| F0116                | All            | Meningitis due to adenovirus                               |
| F0117                | All            | Varicella meningitis                                       |

|                       |                |                                                                             |
|-----------------------|----------------|-----------------------------------------------------------------------------|
| F011y                 | All            | Other viral meningitis                                                      |
| F011z                 | All            | Meningitis - viral NOS                                                      |
| F012.                 | All            | Meningitis due to trypanosomiasis                                           |
| F013.                 | All            | Meningitis due to sarcoidosis                                               |
| F01y.                 | All            | Other non-bacterial meningitis                                              |
| F01y0                 | All            | Meningitis due to leptospira                                                |
| F01yz                 | All            | Other non-bacterial meningitis NOS                                          |
| F01z.                 | All            | Meningitis due to organism NOS                                              |
| F02..                 | All            | Meningitis of unspecified cause                                             |
| F020.                 | All            | Nonpyogenic meningitis                                                      |
| F02z.                 | All            | Unspecified meningitis                                                      |
| F03X.                 | All            | Bacterial meningoenkephalitis and meningomyelitis, not elsewhere classified |
| A543.                 | 00             | Herpetic meningoenkephalitis                                                |
| AD00.                 | 00             | Toxoplasma meningoenkephalitis                                              |
| A1303                 | 00             | Tuberculous meningoenkephalitis                                             |
| A1302                 | 00             | Tuberculous leptomeningitis                                                 |
| <b>Read CTV3 Code</b> | <b>Term ID</b> | <b>Description</b>                                                          |
| X000H                 | All            | Meningitis                                                                  |
| XaDmS                 | All            | Infective meningitis                                                        |
| F00..                 | All            | Bacterial meningitis                                                        |
| F0077                 | All            | Actinomycotic meningitis                                                    |
| F00y0                 | All            | Aerobacter meningitis                                                       |
| F00y2                 | All            | Escherichia coli meningitis                                                 |
| F0070                 | All            | Gonococcal meningitis                                                       |
| F000.                 | All            | Haemophilus meningitis                                                      |
| F00y4                 | All            | Klebsiella meningitis                                                       |
| F00y3                 | All            | Meningitis due to Friedlander bacillus                                      |
| F0071                 | All            | Listeria meningitis                                                         |
| X000R                 | All            | Meningitis in Lyme disease                                                  |
| F005.                 | All            | Meningococcal meningitis                                                    |
| F0078                 | All            | Meningitis due to pertussis                                                 |
| A206.                 | All            | Plague meningitis                                                           |
| F001.                 | All            | Pneumococcal meningitis                                                     |
| Xa9B4                 | All            | Proteus meningitis                                                          |
| F00y6                 | All            | Pseudomonas meningitis                                                      |
| F00y1                 | All            | Meningitis due to bacillus pyocyaneus                                       |
| F0073                 | All            | Salmonella meningitis                                                       |
| F0076                 | All            | Meningitis due to typhoid fever                                             |
| F003.                 | All            | Staphylococcal meningitis                                                   |
| X000P                 | All            | Staphylococcus aureus meningitis                                            |
| X000Q                 | All            | Staphylococcus epidermidis meningitis                                       |
| F002.                 | All            | Streptococcal meningitis                                                    |
| Xa7pz                 | All            | Syphilitic meningitis                                                       |
| F0074                 | All            | Congenital syphilitic meningitis                                            |

|    |       |     |                                                            |
|----|-------|-----|------------------------------------------------------------|
| 1  |       |     |                                                            |
| 2  |       |     |                                                            |
| 3  |       |     |                                                            |
| 4  | X000T | All | Late congenital syphilitic meningitis                      |
| 5  | F0075 | All | Secondary syphilitic meningitis                            |
| 6  | A9180 | All | Acute secondary syphilitic meningitis                      |
| 7  | F004. | All | Tuberculous meningitis                                     |
| 8  |       |     |                                                            |
| 9  | A1300 | All | Tuberculosis of cerebral meninges                          |
| 10 | A1301 | All | Tuberculosis of spinal meninges                            |
| 11 | A1302 | All | Tuberculous leptomeningitis                                |
| 12 | A130z | All | Tuberculous meningitis NOS                                 |
| 13 | AA0y0 | All | Leptospiral meningitis                                     |
| 14 | F007. | All | Meningitis in other bacterial disease classified elsewhere |
| 15 | F0072 | All | Meningitis due to neurosyphilis                            |
| 16 | F007z | All | Unspecified meningitis in bacterial disease EC             |
| 17 | F00y. | All | Other specified bacterial meningitis                       |
| 18 | F00yz | All | Other specified bacterial meningitis NOS                   |
| 19 | F00y5 | All | Morganella morganii meningitis                             |
| 20 | F00z. | All | Bacterial meningitis NOS                                   |
| 21 | Fyu00 | All | [X]Other bacterial meningitis                              |
| 22 | Xa9B5 | All | Viral meningitis                                           |
| 23 | A4z1. | All | Adenoviral meningitis                                      |
| 24 | A4z0. | All | Lymphocytic choriomeningitis                               |
| 25 | F0114 | All | Mumps meningitis                                           |
| 26 | X000M | All | Postmeasles meningitis                                     |
| 27 | F0112 | All | Meningitis due to herpes zoster virus                      |
| 28 | F0113 | All | Herpes simplex meningitis                                  |
| 29 | A42.. | All | Enteroviral meningitis                                     |
| 30 | F0110 | All | Coxsackie viral meningitis                                 |
| 31 | X000J | All | Coxsackie A viral meningitis                               |
| 32 | X000K | All | Coxsackie B viral meningitis                               |
| 33 | F0111 | All | Echovirus meningitis                                       |
| 34 | X000L | All | Chronic echovirus meningoencephalitis                      |
| 35 | A42y. | All | Other specified viral meningitis                           |
| 36 | Ayu8C | All | [X]Other viral meningitis                                  |
| 37 | Ayu8D | All | [X]Viral meningitis, unspecified                           |
| 38 | F011. | All | Meningitis due to viral organisms EC                       |
| 39 | F011y | All | Other viral meningitis                                     |
| 40 | Fyu01 | All | [X]Meningitis in viral diseases classified elsewhere       |
| 41 | XE0R7 | All | Viral meningitis NOS                                       |
| 42 | XE15A | All | Meningitis - viral NOS                                     |
| 43 | F010. | All | Fungal meningitis                                          |
| 44 | AB2y2 | All | Candidal meningitis                                        |
| 45 | F0100 | All | Cryptococcal meningitis                                    |
| 46 | AB32. | All | Coccidioidal meningitis                                    |
| 47 | F010z | All | Other fungal meningitis                                    |
| 48 | Fyu02 | All | [X]Meningitis in mycoses classified elsewhere              |
| 49 |       |     |                                                            |
| 50 |       |     |                                                            |
| 51 |       |     |                                                            |
| 52 |       |     |                                                            |
| 53 |       |     |                                                            |
| 54 |       |     |                                                            |
| 55 |       |     |                                                            |
| 56 |       |     |                                                            |
| 57 |       |     |                                                            |
| 58 |       |     |                                                            |
| 59 |       |     |                                                            |
| 60 |       |     |                                                            |

|       |       |                                                                                         |
|-------|-------|-----------------------------------------------------------------------------------------|
| X000V | All   | Parasitic meningitis                                                                    |
| F012. | All   | Meningitis due to trypanosomiasis                                                       |
| F01.. | All   | Meningitis due to other organisms                                                       |
| F01y. | All   | Other non-bacterial meningitis                                                          |
| F01yz | All   | Other non-bacterial meningitis NOS                                                      |
| F01z. | All   | Meningitis due to organism NOS                                                          |
| Fyu03 | All   | [X]Meningitis in other specified infectious and parasitic diseases classified elsewhere |
| F02.. | All   | Meningitis of unspecified cause                                                         |
| F020. | All   | Non-pyogenic meningitis                                                                 |
| F02z. | All   | Unspecified meningitis                                                                  |
| Fyu04 | All   | [X]Meningitis due to other specified causes                                             |
| X001F | All   | Listeria meningoencephalitis                                                            |
| XE0RD | All   | Herpetic meningoencephalitis                                                            |
| F0334 | Y71kx | Toxoplasma meningoencephalitis                                                          |
| A1303 | All   | Tuberculous meningoencephalitis                                                         |
| X001N | Y00Ck | PAM - Primary amoebic meningoencephalitis                                               |
| Fyu05 | YMACn | [X]Bacterial meningoencephalitis and meningomyelitis, not elsewhere classified          |

## References

1. Abuabara K, Magyari AM, Hoffstad O, Jabbar-Lopez ZK, Smeeth L, Williams HC, et al. Development and Validation of an Algorithm to Accurately Identify Atopic Eczema Patients in Primary Care Electronic Health Records from the UK. *Journal of Investigative Dermatology*. 2017;137(8):1655-62.
2. Hoang U, Liyanage H, Coyle R, Godden C, Jones S, Blair M, et al. Determinants of inter-practice variation in childhood asthma and respiratory infections: cross-sectional study of a national sentinel network. *BMJ open*. 2019;9(1):e024372-e.
3. McGovern A, Hinton W, Correa A, Munro N, Whyte M, de Lusignan S. Real-world evidence studies into treatment adherence, thresholds for intervention and disparities in treatment in people with type 2 diabetes in the UK. *BMJ open*. 2016;6(11):e012801.
4. Muller S, Hider SL, Raza K, Stack RJ, Hayward RA, Mallen CD. An algorithm to identify rheumatoid arthritis in primary care: a Clinical Practice Research Datalink study. *BMJ open*. 2015;5(12):e009309.

# BMJ Open

## The epidemiology, management, and the associated burden of mental health illness, atopic and autoimmune conditions, and common infections in alopecia areata: Protocol for an observational study series

|                                 |                                                                                                                                                                                                                                                                                                                                                                                                                                                                                                                                                                                                                                                                                                                                                                                 |
|---------------------------------|---------------------------------------------------------------------------------------------------------------------------------------------------------------------------------------------------------------------------------------------------------------------------------------------------------------------------------------------------------------------------------------------------------------------------------------------------------------------------------------------------------------------------------------------------------------------------------------------------------------------------------------------------------------------------------------------------------------------------------------------------------------------------------|
| Journal:                        | <i>BMJ Open</i>                                                                                                                                                                                                                                                                                                                                                                                                                                                                                                                                                                                                                                                                                                                                                                 |
| Manuscript ID                   | bmjopen-2020-045718.R1                                                                                                                                                                                                                                                                                                                                                                                                                                                                                                                                                                                                                                                                                                                                                          |
| Article Type:                   | Protocol                                                                                                                                                                                                                                                                                                                                                                                                                                                                                                                                                                                                                                                                                                                                                                        |
| Date Submitted by the Author:   | 15-Jun-2021                                                                                                                                                                                                                                                                                                                                                                                                                                                                                                                                                                                                                                                                                                                                                                     |
| Complete List of Authors:       | Harries, Matthew; Salford Royal NHS Foundation Trust, The Dermatology Centre<br>Macbeth, Abby; Norfolk and Norwich University Hospitals NHS Foundation Trust, Department of Dermatology<br>Holmes, Susan; Queen Elizabeth University Hospital, Alan Lyell Centre for Dermatology<br>Thompson, Andrew; Cardiff University, South Wales Clinical Psychology Training Programme<br>Chiu, Wing; Pfizer Ltd<br>Gallardo, William; Pfizer Ltd<br>Messenger, Andrew; Royal Hallamshire Hospital, Department of Dermatology<br>Tziotzios, Christos; King's College London, St. John's Institute of Dermatology<br>de Lusignan, Simon; University of Oxford, Nuffield Department of Primary Care Health Sciences; University of Surrey, Department of Clinical and Experimental Medicine |
| <b>Primary Subject Heading</b>: | Dermatology                                                                                                                                                                                                                                                                                                                                                                                                                                                                                                                                                                                                                                                                                                                                                                     |
| Secondary Subject Heading:      | Epidemiology, Evidence based practice, General practice / Family practice, Mental health, Patient-centred medicine                                                                                                                                                                                                                                                                                                                                                                                                                                                                                                                                                                                                                                                              |
| Keywords:                       | EPIDEMIOLOGY, MENTAL HEALTH, DERMATOLOGY, IMMUNOLOGY, INFECTIOUS DISEASES, PRIMARY CARE                                                                                                                                                                                                                                                                                                                                                                                                                                                                                                                                                                                                                                                                                         |
|                                 |                                                                                                                                                                                                                                                                                                                                                                                                                                                                                                                                                                                                                                                                                                                                                                                 |

SCHOLARONE™  
Manuscripts



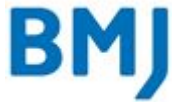

I, the Submitting Author has the right to grant and does grant on behalf of all authors of the Work (as defined in the below author licence), an exclusive licence and/or a non-exclusive licence for contributions from authors who are: i) UK Crown employees; ii) where BMJ has agreed a CC-BY licence shall apply, and/or iii) in accordance with the terms applicable for US Federal Government officers or employees acting as part of their official duties; on a worldwide, perpetual, irrevocable, royalty-free basis to BMJ Publishing Group Ltd ("BMJ") its licensees and where the relevant Journal is co-owned by BMJ to the co-owners of the Journal, to publish the Work in this journal and any other BMJ products and to exploit all rights, as set out in our [licence](#).

The Submitting Author accepts and understands that any supply made under these terms is made by BMJ to the Submitting Author unless you are acting as an employee on behalf of your employer or a postgraduate student of an affiliated institution which is paying any applicable article publishing charge ("APC") for Open Access articles. Where the Submitting Author wishes to make the Work available on an Open Access basis (and intends to pay the relevant APC), the terms of reuse of such Open Access shall be governed by a Creative Commons licence – details of these licences and which [Creative Commons](#) licence will apply to this Work are set out in our licence referred to above.

Other than as permitted in any relevant BMJ Author's Self Archiving Policies, I confirm this Work has not been accepted for publication elsewhere, is not being considered for publication elsewhere and does not duplicate material already published. I confirm all authors consent to publication of this Work and authorise the granting of this licence.

1  
2  
3  
4  
5  
6  
7  
8  
9  
10  
11  
12  
13  
14  
15  
16  
17  
18  
19  
20  
21  
22  
23  
24  
25  
26  
27  
28  
29  
30  
31  
32  
33  
34  
35  
36  
37  
38  
39  
40  
41  
42  
43  
44  
45  
46  
47  
48  
49  
50  
51  
52  
53  
54  
55  
56  
57  
58  
59  
60

# The epidemiology, management, and the associated burden of mental health illness, atopic and autoimmune conditions, and common infections in alopecia areata: Protocol for an observational study series

## Authors:

Dr Matthew Harries<sup>1</sup>, Dr Abby E. Macbeth<sup>2</sup>, Dr Susan Holmes<sup>3</sup>, Professor Andrew R Thompson<sup>4</sup>, Dr Wing Sin Chiu<sup>5</sup>, Dr William Romero Gallardo<sup>5</sup>, Professor Andrew G Messenger<sup>6</sup>, Dr Christos Tziotzios<sup>7</sup>, Professor Simon de Lusignan<sup>8\*</sup>

## Author Affiliations:

1. The Dermatology Centre, Salford Royal NHS Foundation Trust, Salford, Greater Manchester, UK; Centre for Dermatology Research, University of Manchester, MAHSC and NIHR Manchester Biomedical Research Centre, Manchester, UK
2. Department of Dermatology, Norfolk & Norwich University Hospitals NHS Foundation Trust, Norwich, UK
3. Alan Lyell Centre for Dermatology, Queen Elizabeth University Hospital, Glasgow, UK
4. South Wales Clinical Psychology Training Programme, Department of Psychology, Cardiff University, 11th Floor, Tower Building, 70 Park Place Cardiff, CF10 3AT, Wales
5. Pfizer Ltd, Walton Oaks, Walton on the Hill, Tadworth, Surrey, UK
6. Department of Dermatology, Royal Hallamshire Hospital, Sheffield, S10 2JF, UK
7. St. John's Institute of Dermatology, King's College London, London, Guy's Hospital, London, SE1 9RT, UK
8. Nuffield Department of Primary Care health Sciences, University of Oxford, UK; Royal College of General Practitioners, Research and Surveillance Centre, London, UK
- 9.

\* Corresponding author: [simon.delusignan@phc.ox.ac.uk](mailto:simon.delusignan@phc.ox.ac.uk)

**Word count:** 4,525

## Abstract

### Introduction:

Alopecia Areata (AA) is a common cause of immune-mediated non-scarring hair loss. Links between AA and common mental health, autoimmune and atopic conditions, and common infections have previously been described but remain incompletely elucidated and contemporary descriptions of the epidemiology of AA in the UK are lacking.

### Methods and analysis:

Retrospective study series using a large population-based cohort (5.2 million) from the Oxford-Royal College of General Practitioners (RCGP) Research and Surveillance Centre (RSC) database, exploring four themes: AA epidemiology, mental health comorbidities, autoimmune/atopic associations and common infections.

In the epidemiology theme, we will describe the incidence and point prevalence of AA overall and by age, sex, and sociodemographic factors. Healthcare utilisation (primary care visits and secondary care referrals) and treatments for AA will also be assessed. In the mental health theme, we will explore the prevalence and incidence of mental-health conditions (anxiety, depressive episodes, recurrent depressive disorder, adjustment disorder, agoraphobia, self-harm, and parasuicide) in people with AA compared with matched controls. We will also explore mental health treatment patterns (medication and psychological interventions), time off work and unemployment rates. Within the

1  
2  
3 autoimmune/atopic associations theme, we will examine the prevalence of atopic  
4  
5 (atopic dermatitis, allergic rhinitis, asthma) and autoimmune conditions (Crohn's  
6  
7 disease, ulcerative colitis, coeliac disease, type 1 diabetes, Hashimoto's thyroiditis,  
8  
9 Grave's disease, rheumatoid arthritis, psoriatic arthritis, ankylosing spondylitis,  
10  
11 systemic lupus erythematosus, polymyalgia rheumatica, Sjögren's syndrome,  
12  
13 psoriasis, vitiligo, multiple sclerosis, pernicious anaemia) in people with AA  
14  
15 compared with matched controls. We will also estimate the incidence of new onset  
16  
17 atopic and autoimmune conditions after AA diagnosis. Within the common  
18  
19 infections theme, we will examine the incidence of common infections (respiratory  
20  
21 tract Infection, pneumonia, acute bronchitis, influenza, skin infection, urinary tract  
22  
23 infection, genital infections, gastrointestinal infection, herpes simplex, herpes  
24  
25 zoster, meningitis, COVID-19) in people with AA compared with matched controls.

26  
27  
28  
29  
30  
31 **Ethics and dissemination:**

32  
33 The Health Research Authority decision tool classed this a study of usual practice,  
34  
35 ethics approval was not required. Study approval was granted by the RCGP RSC  
36  
37 Study Approval Committee. Results will be disseminated through peer reviewed  
38  
39 publications.  
40  
41  
42  
43  
44

45 **Study Registration:** ClinicalTrials.gov observational study identifier

46  
47 NCT04239521  
48  
49  
50  
51  
52  
53  
54  
55  
56  
57  
58  
59  
60

## Strengths and limitations of this study

- We will use a nationally representative primary care database of over 5.2 million people to explore the epidemiology of alopecia areata (AA), as well as associations of AA with mental health conditions, autoimmune and atopic conditions, and common infections.
- As national guidelines recommend initial assessment and management of AA is undertaken in primary care, this study will provide an accurate contemporary analysis of AA epidemiology in England in both children and adults.
- The Oxford-RCGP-RSC primary care dataset has a high level of completeness on sociodemographic and geographic data and therefore enables an assessment of variation in the incidence and prevalence of AA across England.
- Oxford-RCGP-RSC is the primary infectious disease sentinel network for the UK; the common infections to be explored are all regularly monitored conditions within the network.
- A limitation of the study is that a validated case definition of AA is not available for primary care databases; this will be mitigated by additional analysis to explore the sensitivity of findings when non-specific alopecia diagnostic codes (e.g. unspecified alopecia) are included.

### Key words:

Alopecia areata, epidemiology, incidence, prevalence, common mental health conditions, depression, anxiety, autoimmune disease, atopic conditions, study protocol, common infections.

## Introduction

Alopecia areata (AA) is a common cause of immune-mediated, non-scarring hair loss.(1) Clinical presentations of AA are heterogeneous, ranging from well-demarcated patches of hair loss on the scalp to total loss of hair on the scalp (*alopecia areata totalis*) or entire scalp and body (*alopecia areata universalis*).(2) Active AA is estimated to affect approximately 0.1-0.2%(2, 3) of the population worldwide, with a lifetime risk of 1.0-2.1%.(4-6)

Following the initial episode, the majority of those with limited patchy AA will experience spontaneous remission, but over 80% will have subsequent relapses.(7) Spontaneous remission has been reported to occur in less than 10% of those with extensive AA.(7) A number of treatment options can induce hair growth in people with AA, but none have been shown to have a durable impact on remission.(8)

AA has been associated with a number of autoimmune conditions, supporting the theory of an underlying autoimmune aetiology.(9) Atopic conditions and mental health disorders have also been demonstrated to be more common in people with AA,(9-11) although the temporal relationship between psychiatric conditions and AA remains poorly researched.(12) The association between AA and common infections is not well studied.

This study series, using a large contemporary population-based sample aims to explore and describe many important elements of AA over four key areas: i) the

1  
2  
3 current epidemiology of AA; ii) the prevalence and incidence of psychiatric co-  
4 morbidity in people with AA; iii) the prevalence and incidence of autoimmune  
5 and atopic conditions in people with AA; iv) the incidence of common infections in  
6 people with AA.  
7  
8  
9  
10  
11  
12  
13  
14

## 15 Current knowledge

### 16 Epidemiology

17  
18  
19 Population studies in the USA using the Rochester Epidemiology Project database  
20 estimate the lifetime risk of AA to be 2.1%.<sup>(4)</sup> The database contained information  
21 from all patients registered with a healthcare provider in Olmsted County,  
22 Minnesota from 1990-2009. Previous studies using this database from 1971-1974  
23 estimated the overall prevalence of AA to be 0.1-0.2%,<sup>(13)</sup> with no published  
24 studies reporting prevalence estimates since this. Other epidemiological studies  
25 have assessed the incidence of AA in patients referred to dermatology services.  
26  
27 Clinic-based studies from around the world have estimated the incidence of AA to  
28 be in the region of 0.57-3.8%.<sup>(14-18)</sup>  
29  
30  
31  
32  
33  
34  
35  
36  
37  
38  
39  
40  
41  
42  
43  
44  
45

46 Worldwide, the majority of studies on AA have not found a significant difference in  
47 incidence between males and females.<sup>(5)</sup> AA onset occurs before the age of 40 in  
48 82-86% of cases.<sup>(5)</sup> To date, there have been no large population-based studies of  
49 AA epidemiology in UK populations.  
50  
51  
52  
53  
54  
55  
56  
57  
58  
59  
60

## Mental Health Comorbidities

It is well-recognised by clinical experts in AA that the condition can have a profound psychological impact and a possible comorbid burden of mental health conditions. A recent USA cross-sectional database study comparing 5,605 patients with AA with matched controls found a higher prevalence of mental health diagnoses in the AA group (32.8% vs 20.0%).(19) In particular, higher rates of depression (OR 2.18, 95%CI 1.80-2.63), anxiety disorders (OR 2.46, 95%CI 1.91-3.16), attention-deficit disorders (OR 8.11, 95%CI 5.22-12.59), adjustment disorders (OR 4.80, 95%CI 2.58-8.91) and obsessive compulsive disorders (OR 4.95, 95%CI 1.59-15.35) were observed when compared with controls.(19) These findings concur with previous work and a similar pattern is seen in other countries.(20-23)

Recently a British study identified a bi-directional positive association between major depressive disorder and AA.(24) In a sample of over 400,000 participants, major depressive disorder was seen to increase the risk of incident AA by 90% [HR 1.90, 95%CI 1.67-2.15] and AA was found to increase the risk of incident major depressive disorder by 34% [HR 1.34, 95%CI 1.23-1.46].(24) The association of other common mental health conditions with AA however was not assessed.

## Autoimmune and atopic comorbidities

A central theory in AA pathogenesis is that it is an autoimmune phenomenon resulting from a disruption of hair follicle 'immune privilege', where numerous



1  
2  
3 immunological mechanisms fail to prevent cytotoxic immune attack on cells and  
4 antigens present at that site.(25)  
5  
6  
7  
8  
9

10 A number of studies have reported autoimmune conditions to occur more  
11 frequently in those with AA than in the general population, however results are  
12 conflicting and studies have been limited by potential recruiting, recall and  
13 reporting biases.(26) A Taiwanese retrospective cohort study found individuals  
14 with AA to have an overall increased risk of developing an autoimmune condition  
15 when compared with matched controls (HR 1.86, 95%CI 1.32-2.63). In particular,  
16 greater risks of incident systemic lupus erythematosus (SLE) (HR 5.02; 95%CI  
17 2.08-12.51), psoriasis (HR 2.01; 95%CI 1.06-3.83) and rheumatoid arthritis (RA)  
18 (HR 1.79; 95%CI 1.07-3.00) were observed.(27) There was no relationship  
19 between AA and Hashimoto's thyroiditis or type 1 diabetes (T1DM). A recent  
20 systematic review and meta-analysis found AA to be significantly associated with  
21 Graves' Disease (OR 2.07, 95%CI 1.80-2.38) and Hashimoto's Thyroiditis (OR 2.15;  
22 95%CI 1.71-2.72) but not with SLE, RA, Psoriasis or T1DM.(9)  
23  
24  
25  
26  
27  
28  
29  
30  
31  
32  
33  
34  
35  
36  
37  
38  
39  
40  
41  
42

43 There has also been interest in the prevalence of co-morbid atopy in patients with  
44 AA. The prevalence of atopy in patients with AA has been reported to be in the  
45 range of 11-38.2%(5) representing cohorts from the USA, India and Singapore .(11,  
46 14, 28, 29) A large meta-analysis found patients with AA had higher odds of having  
47 atopic dermatitis (OR 2.36; 95%CI 1.80-3.09) or allergic rhinitis (OR 1.33;95%CI  
48 1.19-1.47) when compared with controls.(9) It is not however surprising from a  
49 pathogenesis perspective in terms of shared pathways of autoimmune  
50 susceptibility; IL-13 loci have been associated with autoimmune and atopic  
51  
52  
53  
54  
55  
56  
57  
58  
59  
60

1  
2  
3 conditions, and a genome-wide association study established that IL-13 is also  
4 susceptible loci for AA. (30)  
5  
6  
7  
8  
9

## 10 Common infections

11  
12  
13 It has been hypothesized that infections may act as triggers for AA; with particular  
14 interest in *Helicobacter pylori*, cytomegalovirus, Epstein-Barr virus, hepatitis B  
15 virus, hepatitis C virus, and human immunodeficiency virus but others have also  
16 been suggested.(9, 31-38) Some case reports have suggested improvement or  
17 resolution of AA with treatment of the associated infection.(33, 39). However, early  
18 small-scale studies have failed to find convincing evidence to support  
19 associations.(35, 36, 40)  
20  
21  
22  
23  
24  
25  
26  
27  
28  
29

30 Multiple genetic loci have been identified to be both protective from infection but  
31 increase the risk for autoimmune disease.(41) Examples include the HLA variants  
32 HLA-DQ2 and HLA-DQ8 which confer protection against viral infections including  
33 influenza but are associated with inflammatory bowel disease,(42, 43) and SH2B3  
34 rs3184504\*A gene variant protective against *Escherichia coli* infection but also  
35 detrimental for inflammatory bowel disease.(44) These loci which, in the past have  
36 conferred a genetic advantage, may still confer a reduced infection risk.(41) It is  
37 currently unclear if the genetic predisposition for AA is caused by genetic factors  
38 which also confer protection against any common infections. In other autoimmune  
39 conditions infection risk is often increased as a result of the pathological changes  
40 resulting from the condition itself, the effects of immune-modulatory treatment, or  
41 through increased exposure to pathogens through healthcare contact.(45-51) An  
42 understanding of the relative infection rates in people with AA compared to those  
43  
44  
45  
46  
47  
48  
49  
50  
51  
52  
53  
54  
55  
56  
57  
58  
59  
60

1  
2  
3 without is of particular importance with the emergence of Janus kinase inhibitors  
4  
5 as a potential treatment option.(52) Whilst this medication class can produce  
6  
7 impressive hair regrowth results even in long-standing AA their use is associated  
8  
9 with some increased infection risk; in particular, urinary tract infections, viral  
10  
11 gastroenteritis fungal infections, and varicella zoster infection.(52)  
12  
13  
14  
15  
16  
17  
18  
19  
20  
21  
22  
23  
24  
25  
26  
27  
28  
29  
30  
31  
32  
33  
34  
35  
36  
37  
38  
39  
40  
41  
42  
43  
44  
45  
46  
47  
48  
49  
50  
51  
52  
53  
54  
55  
56  
57  
58  
59  
60

For peer review only

## Aims and Objectives

We aim to perform a series of retrospective studies using a large population-based cohort in England, over a decade (1<sup>st</sup> January 2009 to 1<sup>st</sup> January 2019) exploring AA in four theme areas: epidemiology, mental health, autoimmune and atopic comorbidities and common infections.

Within the epidemiology theme, our initial objective is to provide a complete description of the incidence and prevalence of AA in England. We will explore the influence of socio-demographic and geographic factors on disease incidence and describe the current service utilisation and management patterns in AA during the year after diagnosis.

Within the mental health theme, we will explore the disease burden of common mental health conditions in people with AA compared with matched controls. We will calculate the prevalence of disease at AA diagnosis, the incidence of disease in the first two years after diagnosis and the influence of socio-demographic factors on the prevalence of common mental health conditions in AA. We will describe the mental health treatment burden in people (medication and psychological service use) with AA and depression and anxiety. We will also explore potential associations between AA and both time off work and unemployment.

Within the autoimmune and atopic comorbidities theme, we will examine the prevalence of atopic and autoimmune conditions at AA diagnosis, and the incidence

1  
2  
3 of new onset atopic and autoimmune conditions in the first five years after  
4 diagnosis in people with AA compared with matched controls.  
5  
6  
7  
8  
9

10 Within the common infections theme, we will examine the incidence of multiple  
11 common infections in the first five years after diagnosis in people with AA  
12 compared with matched controls.  
13  
14  
15  
16  
17

18  
19 The primary and secondary objects of each study theme are formally described in  
20 the Statistical Analysis Plan (Additional file 1).  
21  
22  
23  
24  
25  
26  
27  
28  
29  
30  
31  
32  
33  
34  
35  
36  
37  
38  
39  
40  
41  
42  
43  
44  
45  
46  
47  
48  
49  
50  
51  
52  
53  
54  
55  
56  
57  
58  
59  
60

## Methods and analysis

### Data source

These studies will use routinely collected and collated data from the Oxford-Royal College of General Practitioners (RCGP) Research and Surveillance Centre (RSC) database to provide a broadly representative sample of the population of England. The RCGP RSC incorporates pseudonymised primary care records from over 200 GP practices distributed across England. Details of the cohort included in the database have been published previously.<sup>(53)</sup> At the current time, the database contains data from 2.6 million actively registered people and the historic records of up to 5.2 million people over the last 20 years.

The RCGP RSC database includes patient demographics, diagnoses, laboratory test results, primary care issued prescriptions and processes of care such as clinic visits and specialist referrals. These data are coded using the Read code system. UK general practice records provide several advantages for this study type; UK primary care is a registration-based system (a patient can only register with a single GP), records have been computerised since the 1990s, and pay-for-performance targets (introduced in 2004 through The Quality and Outcomes Framework; QOF) have resulted in consistent high-quality clinical data entry about chronic disease.<sup>(54, 55)</sup> Studies in many chronic diseases such as atopic dermatitis, rheumatoid arthritis, diabetes, inflammatory bowel disease, and chronic obstructive pulmonary disease have been published using RCGP RSC data.<sup>(51, 56-59)</sup> RCGP RSC practices get feedback on their data quality, with a particular

1  
2  
3 emphasis on “episode typing” – designating cases first, new, or ongoing, which  
4  
5 helps differentiate incidence from prevalence.(60)  
6  
7  
8  
9

## 10 Study design

11  
12  
13  
14 Within RCGP RSC, people with and without AA will be identified using Read  
15  
16 diagnostic codes. A range of study designs will be used across the studies and  
17  
18 include; repeated cross-sectional design (epidemiology of AA), case-control design  
19  
20 (the prevalence of common mental health conditions, atopic and autoimmune  
21  
22 conditions, and common infections at AA diagnosis), and matched-cohort design  
23  
24 (the incidence of common mental health conditions, atopic and autoimmune  
25  
26 conditions, and common infections after AA diagnosis).  
27  
28  
29  
30  
31  
32

## 33 Alopecia areata case detection

34  
35  
36 We will identify cases of AA using specific diagnostic codes (Supplementary Table  
37  
38 S1.1, Additional file 2). Confirmed AA will be defined as one or more AA code and  
39  
40 no alternative diagnostic code in the subsequent 365 days (alternative diagnoses  
41  
42 are defined in Supplementary Table S1.1, Additional file 2). Specificity of findings  
43  
44 to this case definition will be evaluated (see Sensitivity analysis and Supplementary  
45  
46 Table S1.2, Additional file 2).  
47  
48  
49  
50  
51  
52  
53  
54  
55  
56  
57  
58  
59  
60

## Study 1: Epidemiology of alopecia areata

### *The incidence and lifetime prevalence of alopecia areata*

We will describe the incidence and point prevalence of AA over 2009-2018 inclusive, by age group, sex, ethnicity, and socioeconomic status, and geographical region. Ethnicity will be categorised as follows based on UK census categories: White, Asian, Black African/Caribbean, Mixed, and Other.(61) Index of multiple deprivation (IMD) will be used as a measure of socioeconomic status.(62)

### *Service utilisation in people with alopecia areata*

We will assess primary care visit frequency, up to one year, in people newly diagnosed with AA compared to matched controls without AA. Measures of healthcare management will also be assessed in people newly diagnosed with AA up to one year, comprising; secondary care dermatology referrals (Supplementary Table S1.3, Additional file 2) and primary care prescriptions for AA treatments (Supplementary Table S1.4, Additional file 2).

## Study 2: Mental Health conditions in people with alopecia areata

We will assess the prevalence and incidence of three common mental conditions as defined by the International Statistical Classification of Diseases and Related Health Problems 10th Revision (ICD10) classification; depressive episodes (F32), recurrent depressive disorder (F33), and non-phobia related anxiety disorders (F41). These conditions have been chosen as they represent the most common mental health conditions presenting to primary care.(63) Conditions will be



1  
2  
3 identified using algorithms validated in UK primary care. We selected the  
4 algorithms to be used in the study to optimise the positive predictive value of case  
5 identification. In brief, we will use a concurrent diagnosis and treatment code to  
6 identify acute depression episodes and for recurrent depressive disorder either a  
7 historical code for any depression and current treatment or a recurrent depressive  
8 disorder specific diagnosis code (Supplementary Tables S2.1, S2.2 and S2.3,  
9 Additional file 2). Anxiety disorder will be identified using a concurrent diagnosis  
10 of an anxiety episode and treatment code (Supplementary Table S2.4, Additional  
11 file 2).

12  
13  
14  
15  
16  
17  
18  
19  
20  
21  
22  
23  
24  
25  
26  
27 To assess prevalence, we will perform a case-control analysis to compare the  
28 prevalence of mental health conditions between people newly diagnosed with AA  
29 and controls. To assess incidence, we will perform a matched cohort analysis in the  
30 subset of cases and controls free of the mental health conditions of interest at  
31 baseline. In addition, we will examine the prevalence and incidence of other mental  
32 health conditions; adjustment disorder, agoraphobia, self-harm, and  
33 overdose/parasuicide attempts (Supplementary Tables S2.5–S2.9, Additional file  
34 2).

35  
36  
37  
38  
39  
40  
41  
42  
43  
44  
45  
46  
47  
48 We will determine the treatment burden of mental health medications in AA  
49 (selective serotonin reuptake inhibitors, serotonin and norepinephrine reuptake  
50 inhibitors, tricyclic antidepressants, tetracyclic antidepressants, and monoamine  
51 oxidase inhibitors, anxiolytic medications) and psychological intervention (referral  
52 rates for counselling, secondary care psychiatrist referrals, including the referrals  
53 to the clinical psychology services/specialists and UK Improving Access to  
54  
55  
56  
57  
58  
59  
60

1  
2  
3 Psychological Therapies (IAPT) program. (Supplementary Table S2.10, Additional  
4 file 2)).  
5  
6

7  
8 We will also assess unemployment and time off work in people of working age (18-  
9 64). Unemployment will be identified using codes relating to unemployment  
10 recorded in the clinical record or the issuing of IB113 or ESA113 form  
11 (Supplementary Table S3.1, Additional file 2). These forms are completed by GPs  
12 when their patients are accessing incapacity benefits (historically) or employment  
13 and support allowance (current) because of a disability or health condition  
14 affecting their ability to work. Time off work will be assessed by reporting the rates  
15 of issue of Med 3 (Statement of Fitness for Work) certification from primary care  
16 (Supplementary Table S3.2, Additional file 2). These “fit notes” are required by  
17 employers when employees have periods of absence from work for sickness lasting  
18 longer than seven days.  
19  
20  
21  
22  
23  
24  
25  
26  
27  
28  
29  
30  
31  
32  
33  
34  
35

### 36 **Study 3: Autoimmune and atopic comorbidities in alopecia areata**

37

38  
39 We will assess the prevalence and incidence of autoimmune and atopic conditions  
40 as listed in Table 1 and defined in Supplementary Tables S4, Additional file 2, in  
41 people with AA. To assess prevalence, we will perform a case-control study to  
42 compare the prevalence of these conditions between cases and controls. To assess  
43 incidence, we will perform a matched cohort study to compare the incidence of new  
44 autoimmune and atopic conditions in the same cases and controls after the point  
45 of matching. Autoimmune and atopic conditions were included if prevalence has  
46 been reported to be 0.3% or greater.<sup>(9, 64-67)</sup> This cut-off was based on power  
47 calculations suggesting this is minimum background prevalence required to detect  
48  
49  
50  
51  
52  
53  
54  
55  
56  
57  
58  
59  
60

1  
2  
3 a 2-fold difference in prevalence (Additional file 1). Excluded autoimmune  
4 conditions due to low prevalence are Addison's disease, autoimmune haemolytic  
5 anaemia, immune thrombocytopenic purpura, autoimmune hepatitis, systemic  
6 sclerosis, myasthenia gravis, and systemic vasculitides.  
7  
8  
9  
10  
11

#### 12 **Study 4: common infections in alopecia areata**

13  
14  
15 We will assess the incidence of common infections in people with AA using a  
16 matched cohort study to compare the incidence of common infections in cases and  
17 controls. The common infections to be examined are listed in Table 2 and defined  
18 in Supplementary Tables S5, Additional file 2.  
19  
20  
21  
22  
23  
24

#### 25 **Statistical methods**

26  
27  
28 The full statistical analysis plan is provided in Additional file 1. Briefly, for Study 1,  
29 AA prevalence will be calculated by dividing the number of AA cases by the total  
30 number of eligible people in the study population. Point prevalence will be  
31 reported for the cohort overall and stratified by sex and age. AA incidence will be  
32 calculated by dividing the total number of new AA cases by the total person-years  
33 of follow-up. Incidence rates will be stratified by calendar year, socio-demographic  
34 factors (age group, sex, ethnicity, rural/urban classification and socioeconomic  
35 status) and geographical region. Adjusted incidence rates will be estimated using  
36 Poisson regression.  
37  
38  
39  
40  
41  
42  
43  
44  
45  
46  
47  
48  
49  
50  
51

52 Service utilisation (Study 1 and 2) will be evaluated by calculation of annual  
53 primary care attendance rates, treatment rates (prescriptions per person per year),  
54 and the total proportion of people with one or more referral for additional services  
55 (dermatology review [Study 1], psychiatrist referral and counselling [Study 2]).  
56  
57  
58  
59  
60

1  
2  
3  
4  
5 For studies 1 (for comparison of primary care visit frequency only), 2 and 3,  
6 matching will be performed as follows: control cohorts will be defined by matching  
7 cases with people without a diagnosis of AA or other alopecia. The follow-up period  
8 for each matched control will begin at the start of follow-up of their matched case.  
9  
10 Each case will be nearest neighbour matched with four controls by age and sex  
11 within GP practices. After matching, if there are substantial differences in  
12 socioeconomic status between cases and controls, re-matching with IMD as an  
13 additional matching criterion will be considered. Study 4 will use the same nearest  
14 neighbour matching process but cases will be defined as people diagnosed with AA  
15 on or before 1<sup>st</sup> January 2014, people who develop AA during follow up will be  
16 excluded from the pool of available controls prior to matching.  
17  
18  
19  
20  
21  
22  
23  
24  
25  
26  
27  
28  
29  
30  
31  
32  
33

34 For Study 2, we will report the prevalence of mental health conditions by socio-  
35 demographic subgroups in cases and controls. The burden of treatment for mental  
36 health conditions will be estimated as the total proportion of people prescribed  
37 each treatment within one year after the study start. The burden of sick days will  
38 be estimated as the total proportion of people issued a Med 3 certificate. To assess  
39 differences in incident mental health conditions in the two years after the study  
40 start, we will use adjusted Cox regression stratified by case/control status. Study 3  
41 (atopic and autoimmune conditions) will similarly compare baseline disease  
42 prevalence in cases and controls, and compare incidence of new onset conditions  
43 in the five years after the study start using adjusted Cox regression.  
44  
45  
46  
47  
48  
49  
50  
51  
52  
53  
54  
55  
56  
57  
58  
59  
60

1  
2  
3 Study 4 will compare infection incidence in cases and controls up to five years.  
4  
5 Infection incidence rates will be estimated by dividing the number of incident  
6  
7 common infections by total person-years of follow-up. Adjusted Poisson regression  
8  
9 will be used to estimate the association between AA and rates of common infection.  
10  
11  
12  
13  
14

### 15 *Sensitivity analyses*

16  
17  
18 To evaluate the specificity of any identified associations to our AA case definition,  
19  
20 in sensitivity analysis we will extract alopecia recorded where the type has not  
21  
22 been specified (Supplementary Table S1.1, Additional file 2). We will then assess  
23  
24 the characteristics of people with non-specific alopecia codes only (i.e. no prior or  
25  
26 subsequent codes specifying alopecia type) compared to the primary AA cohort. If  
27  
28 the characteristics are not markedly different, which would indicate the groups are  
29  
30 clinically different and not comparable, we will evaluate major study outcomes in  
31  
32 this non-specific AA cohort and compare results to those obtained for the primary  
33  
34 AA cohort. We will also evaluate whether stratifying analyses by alopecia extent is  
35  
36 possible, dependent on how well this is recorded in primary care data  
37  
38 (Supplementary Table S1.2, Additional file 2).  
39  
40  
41  
42  
43  
44  
45

46 In Study 4, we will use a Cox regression to estimate time to first infection. We will  
47  
48 also compare the results of the study outcomes when 1) people who develop AA  
49  
50 during the follow up are included as cases and 2) when we perform matching using  
51  
52 the time of AA diagnosis and follow for up to five years after diagnosis (or matched  
53  
54 date for controls).  
55  
56  
57  
58  
59  
60

1  
2  
3  
4  
5  
6  
7  
8  
9  
10  
11  
12  
13  
14  
15  
16  
17  
18  
19  
20  
21  
22  
23  
24  
25  
26  
27  
28  
29  
30  
31  
32  
33  
34  
35  
36  
37  
38  
39  
40  
41  
42  
43  
44  
45  
46  
47  
48  
49  
50  
51  
52  
53  
54  
55  
56  
57  
58  
59  
60

For peer review only

## Discussion

### Clinical Implications

Results derived from this study will be useful in monitoring trends in the incidence of AA in England and may identify factors that influence the disease distribution and treatment patterns. Furthermore, obtaining an accurate picture of the state of AA in the UK will help inform Health Needs Assessments and policy development.

A greater understanding of the prevalence of mental health conditions associated with AA and the directionality of these relationships may help with the development of psychological interventions in AA, as the approach required would likely differ if the symptoms patients are experiencing are pervasive or reactive to an episode of hair loss.(12, 68)

Awareness of AA as a potential risk factor or associated comorbidity for certain autoimmune and atopic conditions may help reduce delays in diagnosis for these conditions and increase vigilance of GPs and dermatologists when reviewing their patients with AA in detecting co-existent conditions. Future work may focus upon whether improved control of an underlying autoimmune or atopic condition may improve chances of achieving remission in AA.

Finally, analysing associations between AA and common infections may provide evidence to support the prescribing of immune modulating medications for the treatment of AA.

## Strengths and limitations of the research methods

Several strengths of our study design are noteworthy. Only two previous studies on the incidence and prevalence of AA have been population-based, with the vast majority being conducted on clinic patients and thus leading to skewed prevalence estimates. This study will also provide a contemporary picture of the burden of AA, as the previous population-based studies were over 20 years ago, and this will be the first AA epidemiology study conducted in the UK. To our knowledge, our study examining common infections will be the first study to attempt to answer the question of whether AA confers protection or increased risk for common infections. A final key strength of this study is the use of the national infections surveillance network to analyse infection risk; with regular feedback to practices with a focus on the quality of infections recording the quality of recording of these infection events higher in this network than other data sources.

A limitation of the study is the lack of a validated AA case definition using primary care data. We are unable to develop one as we have access only to coded anonymised healthcare record data for this study. However, our ontological approach to detecting cases of AA and associated comorbidities will improve accuracy compared to the use of diagnostic codes alone.<sup>(69, 70)</sup> Exclusion of individuals with potentially confounding conditions (i.e. other causes of hair loss) will also improve the accuracy of our estimates. The algorithms used to detect common mental health conditions have been previously validated in UK primary care. The completeness of GP data coding for prescriptions, referrals and issue of Med 3 certificates will ensure that our findings on AA and comorbidity



1  
2  
3 management are robust and reliable, and the “episode typing” functionality of the  
4 RCGP RSC database will ensure incident and prevalent cases are appropriately  
5  
6 RCGP RSC database will ensure incident and prevalent cases are appropriately  
7  
8 assigned. The RCGP RSC database has been shown to be a representative sample of  
9  
10 the UK population (53) and hence our results are broadly generalisable to the UK  
11  
12 as a whole but should not be extended to populations which are dissimilar.  
13  
14  
15

16  
17 There are also other several limitations of the study design that are worthy of  
18  
19 consideration. Whilst a previous study has shown the ethnic breakdown in primary  
20  
21 care data is similar to the UK census and suitable for research,(71) 86% of people  
22  
23 in the UK are from white ethnic groups, limiting power to evaluate people of non-  
24  
25 white ethnicity despite the large sample size. Findings may not be generalisable to  
26  
27 countries with a substantially different ethnicity mix to the UK. This study does not  
28  
29 attempt to detect cases of AA (or the comorbidities of interest) that do not present  
30  
31 to medical attention and hence may underestimate the true burden of disease.  
32  
33 Furthermore, only coded data in the database can be used and hence we rely upon  
34  
35 accurate coding. Some individuals may need to be excluded due to incomplete data,  
36  
37 although in similar studies the exclusion rate due to incomplete data has been  
38  
39 low.(72, 73)  
40  
41  
42  
43  
44  
45  
46  
47

48 Prevalence of Med 3 certification is well captured in primary care but the reason  
49  
50 for issue is not available meaning that we cannot identify the condition relating to  
51  
52 the Med 3 certification. We cannot therefore determine whether the sick leave was  
53  
54 as a result of AA. However, our case-control approach will provide a method for  
55  
56 comparing Med 3 certificate issue rates in those affected and unaffected by AA. The  
57  
58 use of Read codes to identify unemployment is likely to systemically under-  
59  
60

1  
2  
3 estimate unemployment prevalence but is likely to be suitable for providing a  
4  
5 comparison with controls.  
6  
7  
8  
9

10 Another limitation is the possibility of missing treatment information from  
11 secondary care. Secondary care records in the UK are frequently not computerised  
12 and prescriptions are still commonly hand-written. At present there is no  
13  
14 mechanism for universally capturing secondary care prescriptions and linking  
15 them to primary care records. We are therefore likely to underestimate  
16  
17 prescription rates for those with the most severe disease who are seen frequently  
18  
19 in secondary care. Where prescriptions are issued from primary care the indication  
20 for the prescription is not available and we can therefore not confirm that the  
21  
22 prescription is for the treatment of AA.  
23  
24  
25  
26  
27  
28  
29  
30  
31  
32  
33

### 34 **Data management**

35  
36 Individual patient data will be anonymised at the point of data extraction. All data  
37 will remain in anonymised form and will be held on a secure server at the  
38  
39 University of Surrey. All statistical analyses will be performed using R software.  
40  
41  
42  
43

### 44 **Patient and Public Involvement**

45  
46 The design of this protocol did not involve patients or this public.  
47  
48  
49

### 50 **Ethics approval and dissemination**

51  
52 Study approval has been granted by the RCGP RSC Study Approval Committee. The  
53 study does not require formal research ethics committee (REC) approval as it will  
54  
55 use anonymised routinely collected healthcare data; as defined by the NHS Health  
56  
57 Research Authority research decision tool (<http://www.hra->  
58  
59  
60

1  
2  
3 decisiontools.org.uk/research/) and the University of Surrey own Self-Assessment  
4 for Governance and Ethics (SAGE) tool. This observational study has been  
5 registered with ClinicalTrials.gov (NCT03823794). The data will not be used for  
6 any purposes other than for the research which is described in the respective  
7 protocols and which has been approved by the RCGP RSC Study Approval  
8 Committee. We plan to publish the final study results in peer-reviewed journals  
9 and present early findings at scientific meetings.  
10  
11  
12  
13  
14  
15  
16  
17  
18  
19  
20  
21

## 22 Conclusions

23  
24  
25 This study series aims to provide the first large scale population-based analysis of  
26 the epidemiology of AA in the UK and the current patterns of healthcare utilisation  
27 and treatments in this group. We also aim to provide an extensive assessment of  
28 the association between common mental health conditions and work-related  
29 difficulties in people with AA; reporting the prevalence and incidence of these  
30 conditions in people with new onset AA and matched controls. We aim to provide  
31 an extensive evaluation of the prevalence and incidence of autoimmune and atopic  
32 conditions in people with new onset AA and matched controls. Finally, we aim to  
33 provide evidence for baseline common infection risk in people with AA which can  
34 be used to support treatment decisions regarding the use of immune-modulating  
35 medications for AA. This study series will extend our knowledge of the current  
36 disease burden from AA and associated conditions.  
37  
38  
39  
40  
41  
42  
43  
44  
45  
46  
47  
48  
49  
50  
51  
52  
53  
54  
55  
56  
57  
58  
59  
60

## List of abbreviations

|      |                                             |
|------|---------------------------------------------|
| AA   | Alopecia Areata                             |
| CI   | Confidence Interval                         |
| HR   | Hazard Ratio                                |
| IAPT | Improving Access to Psychological Therapies |
| IMD  | Index of Multiple Deprivation               |
| LRTI | Lower respiratory tract infection           |
| OR   | Odds Ratio                                  |
| RA   | Rheumatoid Arthritis                        |
| RCGP | Royal College of General Practitioners      |
| RSC  | Research and Surveillance Centre            |
| SLE  | Systemic Lupus Erythematosus                |
| T1DM | Type 1 Diabetes                             |

## Declarations

## Consent for publication

Not applicable

## Availability of data and materials

The RCGP RSC dataset can be accessed by *bone fide* researchers, approval is on a project-by-project basis ([www.rcgp.org.uk/rsc](http://www.rcgp.org.uk/rsc)). Researchers wishing to directly analyse the patient-level pseudonymised data will be required to complete information governance training and work on the data from the secure servers at the University of Surrey or University of Oxford. Patient-level data cannot be taken out of the secure networks.

## Competing interests

SdeL is Director of RCGP RSC, he has received funding for projects from Eli Lilly, Astra Zeneca, GSK, Seqirus and Takeda – all through his Universities and none related to this study. WSC and WRG are employees of Pfizer Ltd. SH and CT are investigators on the Pfizer funded Allegro clinical trial. AEM, ART, CT, MH and AGM declare that they have no competing interests.

## Funding statement

This research was sponsored and funded by Pfizer.

## Authors' contributions

The study was designed and developed by CT, MH, SH, ART, AEM, WSC, WRG, and AGM with input from SdeL. The protocol writing was directed and critically reviewed by CT, MH, SH, ART, AEM, WSC, WRG, SdeL, and AGM.

## Acknowledgements

Medical writing and editorial support was provided by Louise Jordan, Anita Lynam, Andrew McGovern, and John Dennis at Momentum Data and was funded by Pfizer. The authors would like to acknowledge project management support from Filipa Ferreira of the University of Oxford and University of Surrey. MH was supported by the NIHR Manchester Biomedical Research Centre.

## References

1. Hordinsky MK. Overview of alopecia areata. *J Investig Dermatol Symp Proc*. 2013;16(1):S13-5.
2. Alkhalifah A, Alsantali A, Wang E, McElwee KJ, Shapiro J. Alopecia areata update: part I. Clinical picture, histopathology, and pathogenesis. *Journal of the American Academy of Dermatology*. 2010;62(2):177-88, quiz 89-90.
3. Madani S, Shapiro J. Alopecia areata update. *Journal of the American Academy of Dermatology*. 2000;42(4):549-66; quiz 67-70.
4. Mirzoyev SA, Schrum AG, Davis MDP, Torgerson RR. Lifetime incidence risk of alopecia areata estimated at 2.1% by Rochester Epidemiology Project, 1990-2009. *J Invest Dermatol*. 2014;134(4):1141-2.
5. Villasante Fricke AC, Miteva M. Epidemiology and burden of alopecia areata: a systematic review. *Clin Cosmet Investig Dermatol*. 2015;8:397-403.
6. Richard MA, Corgibet F, Beylot-Barry M, Barbaud A, Bodemer C, Chaussade V, et al. Sex- and age-adjusted prevalence estimates of five chronic inflammatory skin diseases in France: results of the << OBJECTIFS PEAU >> study. *J Eur Acad Dermatol Venereol*. 2018;32(11):1967-71.
7. Harries MJ, Sun J, Paus R, King LE. Management of alopecia areata. *BMJ*. 2010;341:c3671.
8. Cochrane. Treatments for alopecia areata, alopecia totalis and alopecia universalis. 2008.
9. Lee S, Lee H, Lee CH, Lee WS. Comorbidities in alopecia areata: A systematic review and meta-analysis. *Journal of the American Academy of Dermatology*. 2019;80(2):466-77.e16.
10. Montgomery K, White C, Thompson A. A mixed methods survey of social anxiety, anxiety, depression and wig use in alopecia. *BMJ open*. 2017;7(4):e015468.
11. Huang KP, Mullangi S, Guo Y, Qureshi AA. Autoimmune, atopic, and mental health comorbid conditions associated with alopecia areata in the United States. *JAMA Dermatol*. 2013;149(7):789-94.
12. Hunt N, McHale S. The psychological impact of alopecia. *BMJ*. 2005;331(7522):951-3.
13. Safavi K. Prevalence of alopecia areata in the First National Health and Nutrition Examination Survey. *Arch Dermatol*. 1992;128(5):702.
14. Sharma VK, Dawn G, Kumar B. Profile of alopecia areata in Northern India. *Int J Dermatol*. 1996;35(1):22-7.
15. Tan E, Tay YK, Goh CL, Chin Giam Y. The pattern and profile of alopecia areata in Singapore--a study of 219 Asians. *Int J Dermatol*. 2002;41(11):748-53.
16. Yang S, Yang J, Liu JB, Wang HY, Yang Q, Gao M, et al. The genetic epidemiology of alopecia areata in China. *Br J Dermatol*. 2004;151(1):16-23.
17. Guzmán-Sánchez DA, Villanueva-Quintero GD, Alfaro Alfaro N, McMichael A. A clinical study of alopecia areata in Mexico. *Int J Dermatol*. 2007;46(12):1308-10.
18. Furue M, Yamazaki S, Jimbow K, Tsuchida T, Amagai M, Tanaka T, et al. Prevalence of dermatological disorders in Japan: a nationwide, cross-sectional, seasonal, multicenter, hospital-based study. *J Dermatol*. 2011;38(4):310-20.
19. Singam V, Patel KR, Lee HH, Rastogi S, Silverberg JI. Association of alopecia areata with hospitalization for mental health disorders in US adults. *Journal of the American Academy of Dermatology*. 2019;80(3):792-4.

20. Sellami R, Masmoudi J, Ouali U, Mnif L, Amouri M, Turki H, et al. The relationship between alopecia areata and alexithymia, anxiety and depression: a case-control study. *Indian J Dermatol*. 2014;59(4):421.
21. Ruiz-Doblado S, Carrizosa A, García-Hernández MJ. Alopecia areata: psychiatric comorbidity and adjustment to illness. *Int J Dermatol*. 2003;42(6):434-7.
22. Baghestani S, Zare S, Seddigh SH. Severity of Depression and Anxiety in Patients with Alopecia Areata in Bandar Abbas, Iran. *Dermatol Reports*. 2015;7(3):6063.
23. Chu SY, Chen YJ, Tseng WC, Lin MW, Chen TJ, Hwang CY, et al. Psychiatric comorbidities in patients with alopecia areata in Taiwan: a case-control study. *Br J Dermatol*. 2012;166(3):525-31.
24. Vallerand IA, Lewinson RT, Parsons LM, Hardin J, Haber RM, Lowerison MW, et al. Assessment of a Bidirectional Association Between Major Depressive Disorder and Alopecia Areata. *JAMA Dermatol*. 2019.
25. Paus R, Ito N, Takigawa M, Ito T. The hair follicle and immune privilege. *J Invest Dermatol Symp Proc*. 2003;8(2):188-94.
26. Barahmani N, Schabath MB, Duvic M. History of atopy or autoimmunity increases risk of alopecia areata. *Journal of the American Academy of Dermatology*. 2009;61(4):581-91.
27. Chen C-H, Wang K-H, Lin H-C, Chung S-D. Follow-up study on the relationship between alopecia areata and risk of autoimmune diseases. *The Journal of Dermatology*. 2016;43(2):228-9.
28. Tosti A. Practice gaps. Alopecia areata and comorbid conditions. *JAMA Dermatol*. 2013;149(7):794.
29. Tan E, Tay YK, Giam YC. A clinical study of childhood alopecia areata in Singapore. *Pediatr Dermatol*. 2002;19(4):298-301.
30. Jagielska D, Redler S, Brockschmidt FF, Herold C, Pasternack SM, Garcia Bartels N, et al. Follow-up study of the first genome-wide association scan in alopecia areata: IL13 and KIAA0350 as susceptibility loci supported with genome-wide significance. *J Invest Dermatol*. 2012;132(9):2192-7.
31. Bhardwaj EK, Trüeb RM. Acute diffuse and total alopecia of the female scalp associated with borrelia-infection. *International journal of trichology*. 2015;7(1):26-8.
32. Cho M, Cohen PR, Duvic M. Vitiligo and alopecia areata in patients with human immunodeficiency virus infection. *Southern medical journal*. 1995;88(4):489-91.
33. Gil Montoya JA, Cutando Soriano A, Jimenez Prat J. Alopecia areata of dental origin. *Medicina oral : organo oficial de la Sociedad Espanola de Medicina Oral y de la Academia Iberoamericana de Patologia y Medicina Bucal*. 2002;7(4):303-8.
34. Ito T, Tokura Y. Alopecia areata triggered or exacerbated by swine flu virus infection. *The Journal of dermatology*. 2012;39(10):863-4.
35. Jackow C, Puffer N, Hordinsky M, Nelson J, Tarrand J, Duvic M. Alopecia areata and cytomegalovirus infection in twins: genes versus environment? *Journal of the American Academy of Dermatology*. 1998;38(3):418-25.
36. Offidani A, Amerio P, Bernardini ML, Feliciani C, Bossi G. Role of cytomegalovirus replication in alopecia areata pathogenesis. *Journal of cutaneous medicine and surgery*. 2000;4(2):63-5.



- 1
  - 2
  - 3
  - 4
  - 5
  - 6
  - 7
  - 8
  - 9
  - 10
  - 11
  - 12
  - 13
  - 14
  - 15
  - 16
  - 17
  - 18
  - 19
  - 20
  - 21
  - 22
  - 23
  - 24
  - 25
  - 26
  - 27
  - 28
  - 29
  - 30
  - 31
  - 32
  - 33
  - 34
  - 35
  - 36
  - 37
  - 38
  - 39
  - 40
  - 41
  - 42
  - 43
  - 44
  - 45
  - 46
  - 47
  - 48
  - 49
  - 50
  - 51
  - 52
  - 53
  - 54
  - 55
  - 56
  - 57
  - 58
  - 59
  - 60
37. Paoletti V, Mammarella A, Basili S, Paradiso M, Di Franco M, De Matteis A, et al. Prevalence and clinical features of skin diseases in chronic HCV infection. A prospective study in 96 patients. *Panminerva medica*. 2002;44(4):349-52.
38. Richardson CT, Hayden MS, Gilmore ES, Poligone B. Evaluation of the Relationship between Alopecia Areata and Viral Antigen Exposure. *American journal of clinical dermatology*. 2018;19(1):119-26.
39. Kartal ED, Alpat SN, Ozgunes I, Usluer G. Reversible alopecia universalis secondary to PEG-interferon alpha-2b and ribavirin combination therapy in a patient with chronic hepatitis C virus infection. *European journal of gastroenterology & hepatology*. 2007;19(9):817-20.
40. Abdel Hafez HZ, Mahran AM, Hofny EM, Attallah DAA, Sayed DS, Rashed H. Alopecia areata is not associated with *Helicobacter pylori*. *Indian journal of dermatology*. 2009;54(1):17-9.
41. Domínguez-Andrés J, Netea MG. Impact of Historic Migrations and Evolutionary Processes on Human Immunity. *Trends in Immunology*. 2019;40(12):1105-19.
42. Dubois PC, Trynka G, Franke L, Hunt KA, Romanos J, Curtotti A, et al. Multiple common variants for celiac disease influencing immune gene expression. *Nat Genet*. 2010;42(4):295-302.
43. Hung SC, Hou T, Jiang W, Wang N, Qiao SW, Chow IT, et al. Epitope Selection for HLA-DQ2 Presentation: Implications for Celiac Disease and Viral Defense. *J Immunol*. 2019;202(9):2558-69.
44. Zhernakova A, Elbers CC, Ferwerda B, Romanos J, Trynka G, Dubois PC, et al. Evolutionary and functional analysis of celiac risk loci reveals SH2B3 as a protective factor against bacterial infection. *Am J Hum Genet*. 2010;86(6):970-7.
45. Kucharzik T, Maaser C. Infections and Chronic Inflammatory Bowel Disease. *Viszeralmedizin*. 2014;30(5):326-32.
46. Toruner M, Loftus EV, Jr., Harmsen WS, Zinsmeister AR, Orenstein R, Sandborn WJ, et al. Risk factors for opportunistic infections in patients with inflammatory bowel disease. *Gastroenterology*. 2008;134(4):929-36.
47. Brassard P, Bitton A, Suissa A, Sinyavskaya L, Patenaude V, Suissa S. Oral Corticosteroids and the Risk of Serious Infections in Patients With Elderly-Onset Inflammatory Bowel Diseases. *The American Journal Of Gastroenterology*. 2014;109:1795.
48. Lichtenstein GR, Feagan BG, Cohen RD, Salzberg BA, Diamond RH, Chen DM, et al. Serious infections and mortality in association with therapies for Crohn's disease: TREAT registry. *Clinical gastroenterology and hepatology : the official clinical practice journal of the American Gastroenterological Association*. 2006;4(5):621-30.
49. Lichtenstein GR, Feagan BG, Cohen RD, Salzberg BA, Diamond RH, Price S, et al. Serious infection and mortality in patients with Crohn's disease: more than 5 years of follow-up in the TREAT registry. *The American journal of gastroenterology*. 2012;107(9):1409-22.
50. Fardet L, Petersen I, Nazareth I. Common Infections in Patients Prescribed Systemic Glucocorticoids in Primary Care: A Population-Based Cohort Study. *PLOS Medicine*. 2016;13(5):e1002024.
51. Nikiphorou E, de Lusignan S, Mallen C, Khavandi K, Roberts J, Buckley CD, et al. Haematological abnormalities in new-onset rheumatoid arthritis and risk of common infections: a population-based study. *Rheumatology*. 2019.

- 1  
2  
3 52. Gilhar A, Keren A, Paus R. JAK inhibitors and alopecia areata. *The Lancet*. 2019;393(10169):318-9.
- 4  
5  
6 53. Correa A, Hinton W, McGovern A, van Vlymen J, Yonova I, Jones S, et al. Royal  
7 College of General Practitioners Research and Surveillance Centre (RCGP RSC)  
8 sentinel network: a cohort profile. *BMJ Open*. 2016;6(4):e011092.
- 9  
10 54. de Lusignan S, van Weel C. The use of routinely collected computer data for  
11 research in primary care: opportunities and challenges. *Family practice*.  
12 2006;23(2):253-63.
- 13  
14 55. de Lusignan S, Metsemakers JF, Houwink P, Gunnarsdottir V, van der Lei J.  
15 Routinely collected general practice data: goldmines for research? A report of the  
16 European Federation for Medical Informatics Primary Care Informatics Working  
17 Group (EFMI PCIWG) from MIE2006, Maastricht, The Netherlands. *Informatics in  
18 primary care*. 2006;14(3):203-9.
- 19  
20 56. Woodmansey C, McGovern AP, McCullough KA, Whyte MB, Munro NM,  
21 Correa AC, et al. Incidence, Demographics, and Clinical Characteristics of Diabetes  
22 of the Exocrine Pancreas (Type 3c): A Retrospective Cohort Study. *Diabetes care*.  
23 2017;40(11):1486-93.
- 24  
25 57. Nikiphorou E, de Lusignan S, Mallen C, Roberts J, Khavandi K, Bedarida G, et  
26 al. Prognostic value of comorbidity indices and lung diseases in early rheumatoid  
27 arthritis: a UK population-based study. *Rheumatology*. 2019.
- 28  
29 58. de Lusignan S, Alexander H, Broderick C, Dennis J, McGovern A, Feeney C, et  
30 al. Epidemiology and management of atopic dermatitis in England: an  
31 observational cohort study protocol. *BMJ Open*. 2020;10(9):e037518.
- 32  
33 59. Galloway J, Barrett K, Irving P, Khavandi K, Nijher M, Nicholson R, et al. Risk  
34 of venous thromboembolism in immune-mediated inflammatory diseases: a UK  
35 matched cohort study. *RMD Open*. 2020;6(3):e001392.
- 36  
37 60. Pathirannehelage S, Kumarapeli P, Byford R, Yonova I, Ferreira F, de  
38 Lusignan S. Uptake of a Dashboard Designed to Give Realtime Feedback to a  
39 Sentinel Network About Key Data Required for Influenza Vaccine Effectiveness  
40 Studies. *Stud Health Technol Inform*. 2018;247:161-5.
- 41  
42 61. Office for National Statistics. Ethnicity2018 2nd January 2020. Available  
43 from:  
44 [https://www.ons.gov.uk/peoplepopulationandcommunity/culturalidentity/ethni](https://www.ons.gov.uk/peoplepopulationandcommunity/culturalidentity/ethnicity)  
45 [city](https://www.ons.gov.uk/peoplepopulationandcommunity/culturalidentity/ethnicity).
- 46  
47 62. Ministry of Housing CLG. English indices of deprivation 2015: technical  
48 report2015 2nd Jan 2020. Available from:  
49 [https://www.gov.uk/government/publications/english-indices-of-deprivation-](https://www.gov.uk/government/publications/english-indices-of-deprivation-2015-technical-report)  
50 [2015-technical-report](https://www.gov.uk/government/publications/english-indices-of-deprivation-2015-technical-report).
- 51  
52 63. Kessler RC, Chiu WT, Demler O, Merikangas KR, Walters EE. Prevalence,  
53 severity, and comorbidity of 12-month DSM-IV disorders in the National  
54 Comorbidity Survey Replication. *Archives of general psychiatry*. 2005;62(6):617-  
55 27.
- 56  
57 64. Hayter SM, Cook MC. Updated assessment of the prevalence, spectrum and  
58 case definition of autoimmune disease. *Autoimmun Rev*. 2012;11(10):754-65.
- 59  
60 65. Cooper GS, Bynum MLK, Somers EC. Recent insights in the epidemiology of  
61 autoimmune diseases: improved prevalence estimates and understanding of  
62 clustering of diseases. *J Autoimmun*. 2009;33(3-4):197-207.
- 63  
64 66. Dean LE, Jones GT, MacDonald AG, Downham C, Sturrock RD, Macfarlane GJ.  
65 Global prevalence of ankylosing spondylitis. *Rheumatology*. 2013;53(4):650-7.

- 1  
2  
3 67. Gladman DD, Antoni C, Mease P, Clegg DO, Nash P. Psoriatic arthritis:  
4 epidemiology, clinical features, course, and outcome. *Annals of the Rheumatic*  
5 *Diseases*. 2005;64(suppl 2):ii14-ii7.  
6  
7 68. Prickitt J, McMichael AJ, Gallagher L, Kalabokes V, Boeck C. Helping patients  
8 cope with chronic alopecia areata. *Dermatol Nurs*. 2004;16(3):237-41.  
9  
10 69. Rayner L, Sherlock J, Creagh-Brown B, Williams J, deLusignan S. The  
11 prevalence of COPD in England: An ontological approach to case detection in  
12 primary care. *Respir Med*. 2017;132:217-25.  
13  
14 70. de Lusignan S. In this issue: Ontologies a key concept in informatics and key  
15 for open definition of cases, exposures and outcome measures. *BMJ Health &*  
16 *Care Informatics*. 2015;22(2):i-v.  
17  
18 71. Mathur R, Bhaskaran K, Chaturvedi N, Leon DA, vanStaa T, Grundy E, et al.  
19 Completeness and usability of ethnicity data in UK-based primary care and hospital  
20 databases. *Journal of public health (Oxford, England)*. 2014;36(4):684-92.  
21  
22 72. Rayner LH, McGovern A, Sherlock J, Gatenby P, Correa A, Creagh-Brown B, et  
23 al. The impact of therapy on the risk of asthma in type 2 diabetes. *Clin Respir J*.  
24 2019;13(5):299-305.  
25  
26 73. Kumar S, de Lusignan S, McGovern A, Correa A, Hriskova M, Gatenby P, et al.  
27 Ischaemic stroke, haemorrhage, and mortality in older patients with chronic  
28 kidney disease newly started on anticoagulation for atrial fibrillation: a population  
29 based study from UK primary care. *Bmj*. 2018;360:k342.  
30  
31 74. Behr MA, Divangahi M, Lalande J-D. What's in a name? The (mis)labelling of  
32 Crohn's as an autoimmune disease. *The Lancet*. 2010;376(9736):202-3.  
33  
34  
35  
36  
37  
38  
39  
40  
41  
42  
43  
44  
45  
46  
47  
48  
49  
50  
51  
52  
53  
54  
55  
56  
57  
58  
59  
60

## Tables

**Table 1.** The autoimmune and atopic conditions to be explored. For full definitions see Supplementary Tables S4.1 – S4.16, Additional file 2

| <b>Disease category</b>  | <b>Conditions</b>                                                                                                                           |
|--------------------------|---------------------------------------------------------------------------------------------------------------------------------------------|
| <b>Atopic conditions</b> | Atopic dermatitis, allergic rhinitis, asthma                                                                                                |
| <b>Gastrointestinal</b>  | Crohn's disease*, ulcerative colitis, coeliac disease, pernicious anaemia                                                                   |
| <b>Endocrine</b>         | Type 1 diabetes, Hashimoto's thyroiditis, Grave's disease                                                                                   |
| <b>Rheumatological</b>   | Rheumatoid arthritis, psoriatic arthritis, ankylosing spondylitis, systemic lupus erythematosus, polymyalgia rheumatica, Sjögren's syndrome |
| <b>Dermatological</b>    | Psoriasis, vitiligo                                                                                                                         |
| <b>Neurological</b>      | Multiple sclerosis                                                                                                                          |

\*Whilst there has been some debate about whether or not Crohn's disease is an autoimmune condition it involves a degree of immune dysregulation and is therefore included for completeness.(74)

**Table 2.** The common infections to be explored. \*Inclusion of COVID-19 will depend on data availability.

| <b>Infection</b>                         | <b>Description</b>                                                                                                    |
|------------------------------------------|-----------------------------------------------------------------------------------------------------------------------|
| <b>Upper respiratory tract infection</b> | All infections of the upper respiratory tract including rhinitis, pharyngitis, sinusitis, and the common cold         |
| <b>Lower respiratory tract infection</b> | All infection of the lower respiratory tract including pneumonia and acute bronchitis.                                |
| <b>Pneumonia</b>                         | A subgroup of LRTI consisting of bacterial and viral pneumonias                                                       |
| <b>Acute bronchitis</b>                  | A subgroup of LRTI consisting of inflammation of the large and medium airways usually of viral origin                 |
| <b>Influenza</b>                         | Confirmed cases of influenza and cases of influenza-like illness                                                      |
| <b>Skin infection</b>                    | Cellulitis and other infective skin conditions                                                                        |
| <b>Urinary tract infection</b>           | Infections of the urinary tract including cystitis and pyelonephritis                                                 |
| <b>Genital infections</b>                | All infections of the genital tract including sexually transmitted infections and non-sexually transmitted infections |
| <b>Gastrointestinal infection</b>        | All infections of the gastrointestinal tract including gastroenteritis                                                |
| <b>Herpes simplex</b>                    | Mucocutaneous infections caused by herpes simplex viruses                                                             |
| <b>Herpes zoster</b>                     | Infections caused by the varicella-zoster virus                                                                       |
| <b>Meningitis</b>                        | All infections, bacterial or viral, causing meningitis                                                                |
| <b>COVID-19</b>                          | Confirmed or clinically diagnosed COVID-19*                                                                           |

1  
2  
3  
4  
5  
6  
7  
8

# **The epidemiology, management, and the associated burden of mental health illness, atopic and autoimmune conditions, and common infections in alopecia areata: Statistical Analysis Plan**

9  
10  
11  
12  
13  
14  
15  
16  
17  
18  
19  
20  
21  
22  
23  
24  
25  
26  
27  
28  
29  
30  
31  
32  
33  
34  
35  
36  
37  
38  
39  
40  
41  
42  
43  
44  
45  
46  
47  
48  
49  
50  
51  
52  
53  
54  
55  
56  
57  
58  
59  
60

Dr Matthew Harries, Dr Abby E. Macbeth, Dr Susan Holmes, Professor Andrew R  
Thompson, Dr Wing Sin Chiu, Dr William Romero Gallardo, Professor Andrew G  
Messenger, Dr Christos Tziotzios, Professor Simon de Lusignan

For peer review only

## Contents

|    |                                                                     |    |
|----|---------------------------------------------------------------------|----|
| 1  |                                                                     |    |
| 2  | List of abbreviations .....                                         | 4  |
| 3  |                                                                     |    |
| 4  | 1. Introduction .....                                               | 5  |
| 5  | 1.1 Background .....                                                | 5  |
| 6  | 1.2. Purposes of analyses .....                                     | 5  |
| 7  | Study 1: Epidemiology of AA .....                                   | 5  |
| 8  | Study 2: Mental health comorbidities in patients with AA .....      | 5  |
| 9  | Study 3: Autoimmune and atopic conditions in people with AA .....   | 6  |
| 10 | Study 4: Common infections in people with AA .....                  | 6  |
| 11 |                                                                     |    |
| 12 | 2. Study objectives and endpoints .....                             | 7  |
| 13 | 2.1 Study objectives .....                                          | 7  |
| 14 | 2.1.1 Study 1 .....                                                 | 7  |
| 15 | 2.1.2 Study 2 .....                                                 | 7  |
| 16 | 2.1.3 Study 3 .....                                                 | 7  |
| 17 | 2.1.4 Study 4 .....                                                 | 7  |
| 18 | 2.2 Primary objectives .....                                        | 8  |
| 19 | 2.2.1 Study 1 .....                                                 | 8  |
| 20 | 2.2.2 Study 2 .....                                                 | 8  |
| 21 | 2.2.3 Study 3 .....                                                 | 8  |
| 22 | 2.2.4 Study 4 .....                                                 | 8  |
| 23 | 2.3 Secondary objectives: .....                                     | 9  |
| 24 | 2.3.1 Study 1 .....                                                 | 9  |
| 25 | 2.3.2 Study 2 .....                                                 | 9  |
| 26 | 2.3.3 Study 3 .....                                                 | 9  |
| 27 | 2.3.4 Study 4 .....                                                 | 9  |
| 28 | 2.4 Primary endpoint .....                                          | 10 |
| 29 | 2.5 Secondary endpoints .....                                       | 11 |
| 30 | 2.6 Other exploratory analyses .....                                | 11 |
| 31 | 3 General Study Design and Plan .....                               | 11 |
| 32 | 3.1 Study Design .....                                              | 11 |
| 33 | 3.1.1 Study 1: .....                                                | 11 |
| 34 | 3.1.2 Study 2: .....                                                | 11 |
| 35 | 3.1.3 Study 3: .....                                                | 11 |
| 36 | 3.1.4 Study 4: .....                                                | 12 |
| 37 | 3.2 Data source and Read codes .....                                | 12 |
| 38 | 3.3 Data extraction .....                                           | 12 |
| 39 | 3.4 Inclusion-Exclusion Criteria and General Study Population ..... | 12 |
| 40 | 3.4.1 AA definition .....                                           | 12 |
| 41 | 3.5 Baseline socio-economic characteristics .....                   | 13 |
| 42 |                                                                     |    |
| 43 |                                                                     |    |
| 44 |                                                                     |    |
| 45 |                                                                     |    |
| 46 |                                                                     |    |
| 47 |                                                                     |    |
| 48 |                                                                     |    |
| 49 |                                                                     |    |
| 50 |                                                                     |    |
| 51 |                                                                     |    |
| 52 |                                                                     |    |
| 53 |                                                                     |    |
| 54 |                                                                     |    |
| 55 |                                                                     |    |
| 56 |                                                                     |    |
| 57 |                                                                     |    |
| 58 |                                                                     |    |
| 59 |                                                                     |    |
| 60 |                                                                     |    |

|    |                                                                     |    |
|----|---------------------------------------------------------------------|----|
| 1  | 3.6 Epidemiology of AA .....                                        | 13 |
| 2  | 3.7 Current service utilisation and management patterns .....       | 13 |
| 3  | 3.8 Mental health treatment, sick day, and unemployment burden..... | 13 |
| 4  |                                                                     |    |
| 5  | 4 Sample size calculations.....                                     | 14 |
| 6  |                                                                     |    |
| 7  | 4.1.1 Study 1.....                                                  | 14 |
| 8  | 4.1.2 Study 2.....                                                  | 14 |
| 9  |                                                                     |    |
| 10 | 4.1.3 Study 3.....                                                  | 14 |
| 11 | 4.1.4 Study 4.....                                                  | 15 |
| 12 |                                                                     |    |
| 13 | 5 Populations to be analysed.....                                   | 15 |
| 14 |                                                                     |    |
| 15 | 5.1 Inclusion Criteria .....                                        | 15 |
| 16 | 5.2 Exclusion Criteria .....                                        | 15 |
| 17 | 5.3 Matching process.....                                           | 16 |
| 18 | 5.4 AA definition exploratory analyses.....                         | 16 |
| 19 |                                                                     |    |
| 20 | 6 Statistical Analysis .....                                        | 17 |
| 21 |                                                                     |    |
| 22 | 6.1 Statistical principles .....                                    | 17 |
| 23 | 6.2 Primary Endpoint Analysis .....                                 | 17 |
| 24 |                                                                     |    |
| 25 | 6.2.1 Study 1 .....                                                 | 17 |
| 26 | 6.2.2 Study 2 .....                                                 | 18 |
| 27 | 6.2.3 Study 3 .....                                                 | 19 |
| 28 | 6.2.4 Study 4.....                                                  | 19 |
| 29 |                                                                     |    |
| 30 | 6.3 Secondary Objective Analysis .....                              | 19 |
| 31 |                                                                     |    |
| 32 | 6.2.1 Study 1 .....                                                 | 19 |
| 33 | 6.2.2 Study 2 .....                                                 | 19 |
| 34 | 6.2.3 Study 3 .....                                                 | 20 |
| 35 | 6.2.4 Study 4.....                                                  | 20 |
| 36 |                                                                     |    |
| 37 | 6.4 Sensitivity analysis.....                                       | 20 |
| 38 | 6.5 Missing data.....                                               | 20 |
| 39 |                                                                     |    |
| 40 | 7 Study Limitations .....                                           | 21 |
| 41 |                                                                     |    |
| 42 | 8 Statistical software .....                                        | 21 |
| 43 |                                                                     |    |
| 44 | 9 Ethics .....                                                      | 21 |
| 45 |                                                                     |    |
| 46 | 10 Acknowledgements .....                                           | 21 |
| 47 |                                                                     |    |
| 48 | References .....                                                    | 22 |
| 49 |                                                                     |    |
| 50 |                                                                     |    |
| 51 |                                                                     |    |
| 52 |                                                                     |    |
| 53 |                                                                     |    |
| 54 |                                                                     |    |
| 55 |                                                                     |    |
| 56 |                                                                     |    |
| 57 |                                                                     |    |
| 58 |                                                                     |    |
| 59 |                                                                     |    |
| 60 |                                                                     |    |



## List of abbreviations

| Abbreviation | Full Form                                                               |
|--------------|-------------------------------------------------------------------------|
| AA           | Alopecia Areata                                                         |
| BMI          | Body Mass Index                                                         |
| CKD          | Chronic Kidney Disease stage 3-5                                        |
| COPD         | Chronic Obstructive Pulmonary Disorder                                  |
| HR           | Hazard Ratio                                                            |
| IMD          | Index of Multiple Deprivation                                           |
| NIHR         | National Institute for Health Research                                  |
| OR           | Odds Ratio                                                              |
| RA           | Rheumatoid Arthritis                                                    |
| RCGP RSC     | Royal College of General Practitioners Research and Surveillance Centre |
| SD           | Standard Deviation                                                      |
| SES          | Socio-Economic Status                                                   |
| SLE          | Systemic Lupus Erythematosus                                            |
| SSRI         | Selective Serotonin Reuptake Inhibitor                                  |
| T1DM         | Type 1 Diabetes                                                         |
| T2DM         | Type 2 Diabetes                                                         |

# 1. Introduction

## 1.1 Background

Alopecia areata (AA) is a common cause of immune-mediated, non-scarring hair loss. (1) Clinical presentations of AA are heterogeneous, ranging from well-demarcated patches of hair loss on the scalp to total loss of hair on the scalp (*alopecia areata totalis*) or entire scalp and body (*alopecia areata universalis*). (2) Active AA is estimated to affect approximately 0.1-0.2% (2, 3) of the population worldwide, with a lifetime risk of 1.0 -2.1%. (4-6)

Following the initial episode, the majority of those with limited patchy AA will experience spontaneous remission, but over 80% will have subsequent relapses. (7) Spontaneous remission has been reported to occur in less than 10% of those with extensive AA. (7) A number of treatment options can induce hair growth in people with AA, but none have been shown to have a durable impact on remission. (8)

AA has been associated with several autoimmune conditions supporting the theory of an underlying autoimmune aetiology. (9, 10) Atopic conditions and mental health disorders have also been demonstrated to be more common in people with AA, (9-11) although the temporal relationship between psychiatric conditions and AA remains poorly researched. (12) The association between AA and common infections is not well studied.

## 1.2. Purposes of analyses

This statistical analysis plan covers four related AA studies.

### Study 1: Epidemiology of AA

Population studies in the USA using the Rochester Epidemiology Project database estimate the lifetime risk of AA to be 2.1%. (4) The database contained information from all patients registered with a healthcare provider in Olmstead County, Minnesota from 1990-2009. Previous studies using this database from 1971-1974 estimated the overall prevalence of AA to be 0.1-0.2%, (13) with no published studies reporting prevalence estimates since this. Other epidemiological studies have assessed the incidence of AA in patients referred to dermatology services. Clinic-based studies from around the world have estimated the incidence of AA to be in the region of 0.57-3.8%. (14-18)

Worldwide, the majority of studies on AA have not found a significant difference in incidence between males and females. (5) AA onset occurs before the age of 40 in 82-86% of cases. (5) To date, there have been no large population-based studies of AA epidemiology in UK populations.

### Study 2: Mental health comorbidities in patients with AA

It is well recognised by clinical experts in AA that the condition can have a profound psychological impact and a possible comorbid burden of mental health conditions. A recent USA cross-sectional database study comparing 5,605 patients with AA with matched controls found a higher prevalence of mental health diagnoses in the AA group (32.8% vs 20.0%). (19) In particular, higher rates of depression (OR 2.18, 95%CI 1.80-2.63), anxiety disorders (OR 2.46, 95%CI 1.91-3.16), attention-deficit disorders (OR 8.11, 95%CI 5.22-12.59), adjustment disorders (OR 4.80, 95%CI 2.58-8.91) and obsessive compulsive

1 disorders (OR 4.95, 95%CI 1.59-15.35) were observed when compared with controls. (19)  
2 These findings concur with previous work and a similar pattern is seen in other countries.  
3 (20-23)  
4

5 Recently a British study identified a bi-directional positive association between major  
6 depressive disorder and AA. (24) In a sample of over 400,000 participants, major depressive  
7 disorder was seen to increase the risk of incident AA by 90% [HR 1.90, 95%CI 1.67-2.15]  
8 and AA was found to increase the risk of incident major depressive disorder by 34% [HR  
9 1.34, 95%CI 1.23-1.46]. (24) The association of other common mental health conditions  
10 with AA however was not assessed.  
11

### 12 **Study 3: Autoimmune and atopic conditions in people with AA**

13 A central theory in AA pathogenesis is that it is an autoimmune phenomenon resulting from  
14 a disruption of hair follicle 'immune privilege', where numerous immunological  
15 mechanisms fail to prevent cytotoxic immune attack on cells and antigens present at that  
16 site. (25)  
17

18 A number of studies have reported autoimmune conditions to occur more frequently in  
19 those with AA than in the general population, however results are conflicting, and studies  
20 have been limited by potential recruiting, recall and reporting biases. (26) A Taiwanese  
21 retrospective cohort study found individuals with AA to have an overall increased risk of  
22 developing an autoimmune condition when compared with matched controls (HR 1.86,  
23 95%CI 1.32-2.63). In particular, greater risks of incident systemic lupus erythematosus  
24 (SLE) (HR 5.02; 95%CI 2.08-12.51), psoriasis (HR 2.01; 95%CI 1.06-3.83) and rheumatoid  
25 arthritis (RA) (HR 1.79; 95%CI 1.07-3.00) were observed. (27) There was no relationship  
26 between AA and Hashimoto's thyroiditis or type 1 diabetes (T1DM). A large USA cross-  
27 sectional study of 3,658 individuals with AA, found that 14.6% had a diagnosis of thyroid  
28 disease, 11.1% had T1DM, 4.3% had inflammatory bowel disease, 2.8% had vitiligo and 6.3%  
29 had psoriasis. (10) These figures were all higher than would be expected in the general  
30 population. A recent systematic review and meta-analysis found AA to be significantly  
31 associated with Graves' Disease (OR 2.07, 95%CI 1.80-2.38) and Hashimoto's Thyroiditis  
32 (OR 2.15; 95%CI 1.71-2.72) but not with SLE, RA, Psoriasis or T1DM. (9)  
33  
34

35 There has also been interest in the prevalence of co-morbid atopy in patients with AA. The  
36 prevalence of atopy in patients with AA has been reported to be in the range of 11-38.2%  
37 (5) representing cohorts from the USA, India and Singapore. (10, 14, 28, 29) A large meta-  
38 analysis found patients with AA had higher odds of having atopic dermatitis (OR 2.36;  
39 95%CI 1.80-3.09) and allergic rhinitis (OR 1.33;95%CI 1.19-1.47) when compared with  
40 controls. (9) It is not however surprising from a pathogenesis perspective in terms of shared  
41 pathways of autoimmune susceptibility; IL-13 loci have been associated with autoimmune  
42 and atopic conditions, and a genome-wide association study established that IL-13 is also  
43 susceptible loci for AA. (30)  
44  
45

### 46 **Study 4: Common infections in people with AA**

47 It has been hypothesized that infections may act as triggers for AA; with particular interest  
48 in *Helicobacter pylori*, cytomegalovirus, Epstein-Barr virus, hepatitis B virus, hepatitis C  
49 virus, and human immunodeficiency virus but others have also been suggested.(9, 31-38)  
50 Some case reports has suggested improvement or resolution of AA with treatment of the  
51 associated infection.(33, 39). However, early small-scale studies have failed to find  
52 convincing evidence to support associations.(35, 36, 40)  
53  
54  
55  
56  
57  
58  
59  
60

1 Multiple genetic loci have been identified to be both protective from infection but increase  
2 the risk for autoimmune disease.(41) Examples include the HLA variants HLA-DQ2 and  
3 HLA-DQ8 which confer protection against viral infections including influenza but are  
4 associated with inflammatory bowel disease,(42, 43) and SH2B3 rs3184504\*A gene variant  
5 protective against Escherichia coli infection but also detrimental for inflammatory bowel  
6 disease.(44) These loci which, in the past have conferred a genetic advantage, may still  
7 confer a reduced infection risk.(41) It is currently unclear if the genetic predisposition for  
8 AA is caused by genetic factors which also confer protection against any common infections.  
9 In other autoimmune conditions, infection risk is often increased as a result of the  
10 pathological changes resulting from the condition itself, the effects of immune-modulatory  
11 treatment, or through increased exposure to pathogens through healthcare contact.(45-51)  
12 An understanding of the relative infection rates in people with AA compared to those  
13 without is of particular importance with the emergence of Janus kinase inhibitors as a  
14 potential treatment option.(52) Whilst this medication class can produce impressive hair  
15 regrowth results even in long-standing, AA their use is associated with some increased  
16 infection risk; in particular, urinary tract infections, viral gastroenteritis fungal infections,  
17 and varicella zoster infection.(52)

## 2. Study objectives and endpoints

### 2.1 Study objectives

#### 2.1.1 Study 1

The overall purpose of study 1 is to describe the epidemiology (incidence and prevalence) of AA and to assess the current level of primary care service utilisation and management patterns associated with people diagnosed with AA.

#### 2.1.2 Study 2

The overall purpose of study 2 is to assess the prevalence and incidence of mental health conditions (depressive episodes, recurrent depressive disorder and anxiety disorder) in adult people diagnosed with AA relative to a control population of people without a diagnosis of AA. In addition, the study will determine the treatment burden (medications and psychological interventions used to treat mental health conditions), 'sick day' burden, and unemployment burden of AA.

#### 2.1.3 Study 3

The overall purpose of study 3 is to assess the prevalence and incidence of atopic and autoimmune conditions in adult people diagnosed with AA relative to a control population of people without AA.

#### 2.1.4 Study 4

The overall purpose of study 4 is to assess the incidence of common infections in people diagnosed with AA relative to a control population of people without AA.

## 2.2 Primary objectives

### 2.2.1 Study 1

#### 2.2.1.1

Describe the epidemiology of AA: Incidence of AA over time and by age, sex, ethnicity, and sociodemographic factors, and point prevalence by age and sex.

#### 2.2.1.2

Describe current primary care service utilisation and management patterns in AA.

### 2.2.2 Study 2

#### 2.2.2.1

Describe the prevalence of common mental health conditions (depressive episodes, recurrent depressive disorder and anxiety disorder) in adult people diagnosed with AA in a contemporary real-world population compared with matched controls without AA.

#### 2.2.2.2

Describe the incidence of common mental health conditions (depressive episodes, recurrent depressive disorder and anxiety disorder) in adult people diagnosed with AA in a contemporary real-world population compared with matched controls in the first two years after AA diagnosis.

#### 2.2.2.3

Describe the mental health treatment burden of adult people diagnosed with AA.

### 2.2.3 Study 3

#### 2.2.3.1

Describe the prevalence of atopic and autoimmune conditions in adult people diagnosed with AA in a contemporary real-world population at diagnosis compared with matched controls without AA.

#### 2.2.3.2

Describe the incidence of atopic and autoimmune conditions in adult people with AA in a contemporary real-world population compared with matched controls in the first five years after AA diagnosis.

### 2.2.4 Study 4

#### 2.2.4.1

Describe the overall rate of common infections in people with AA in a contemporary real-world population at diagnosis compared with matched controls in the first five years after AA diagnosis.

#### 2.2.4.2

1 Describe the rates of individual common infections in people with AA in a contemporary  
2 real-world population at diagnosis compared with matched controls in the first five years  
3 after AA diagnosis.  
4  
5

## 6 **2.3 Secondary objectives:**

### 8 **2.3.1 Study 1**

#### 10 **2.3.1.1**

11 Describe the geographic distribution of AA incidence within England. English regions  
12 comprise; Greater London, South East, South West, West Midlands, North West, North East,  
13 Yorkshire and the Humber, East Midlands, and East of England.  
14  
15

### 16 **2.3.2 Study 2**

#### 18 **2.3.2.1**

19 Describe the prevalence of additional mental health conditions (adjustment disorder,  
20 agoraphobia, self-harm, and overdose/parasuicide attempts) in adult people diagnosed  
21 with AA and controls.  
22  
23

#### 24 **2.3.2.2**

25 Describe the burden of 'sick days' in adult people diagnosed with AA and controls.  
26  
27

#### 28 **2.3.2.3**

29 Describe the prevalence of unemployment in adult people diagnosed with AA and controls.  
30  
31

### 32 **2.3.3 Study 3**

33 None  
34

### 35 **2.3.4 Study 4**

36 None  
37  
38  
39  
40  
41  
42  
43  
44  
45  
46  
47  
48  
49  
50  
51  
52  
53  
54  
55  
56  
57  
58  
59  
60

## 2.4 Primary endpoint

The primary endpoints for the four studies are listed in Table 1.

| Study | Endpoints                                                                                                                                                                                                                                                                                                                                                                                                                                                                                                                                                                                                                                                                                                                                                                  |
|-------|----------------------------------------------------------------------------------------------------------------------------------------------------------------------------------------------------------------------------------------------------------------------------------------------------------------------------------------------------------------------------------------------------------------------------------------------------------------------------------------------------------------------------------------------------------------------------------------------------------------------------------------------------------------------------------------------------------------------------------------------------------------------------|
| 1     | Diagnosis of AA is the date of the first diagnosis code in the record and no alternative diagnosis that merits exclusion* diagnosed in the subsequent 365 days from date of AA diagnosis (see Supplementary Table S1.1, Additional file 2).                                                                                                                                                                                                                                                                                                                                                                                                                                                                                                                                |
| 2     | Diagnosis of AA is the date of the first diagnosis code in the record and no alternative diagnosis that merits exclusion* diagnosed in the subsequent 365 days from date of AA diagnosis (see Supplementary Table S1.1, Additional file 2).<br><br>Diagnosis of a common mental health condition categorized as depressive episodes, recurrent depressive disorder or non-phobia related anxiety disorders at the time of AA diagnosis (See Supplementary Tables S2.1 - S2.4, Additional file 2).<br><br>Time to diagnosis of a common mental health condition categorized as depressive episodes, recurrent depressive disorder or non-phobia related anxiety disorders in the first two years post AA diagnosis (See Supplementary Tables S2.1 -S2.4, Additional file 2) |
| 3     | Diagnosis of AA is the date of the first diagnosis code in the record and no alternative diagnosis that merits exclusion* diagnosed in the subsequent 365 days from date of AA diagnosis (see Supplementary Table S1.1, Additional file 2).<br><br>Diagnosis of an atopic (atopic dermatitis, allergic rhinitis, asthma) or autoimmune condition (Supplementary Tables S4.1 – S4.16, Additional file 2) at the time of AA diagnosis.<br><br>Time to diagnosis of an atopic (atopic dermatitis, allergic rhinitis, asthma) or autoimmune condition (Supplementary Tables S4.1 – S4.16, Additional file 2) in the first five years after AA diagnosis.                                                                                                                       |
| 4     | Diagnosis of AA is the date of the first diagnosis code in the record and no alternative diagnosis that merits exclusion* diagnosed in the subsequent 365 days from date of AA diagnosis (see Supplementary Table S1.1, Additional file 2).<br><br>Diagnosis of a common infection (Upper and lower respiratory tract infection, Pneumonia, Acute bronchitis, Influenza, Skin infection, Urinary tract infection, Genital infections, Gastrointestinal infection, Herpes simplex , Herpes zoster, Meningitis and Covid-19 (depending on data availability)) (Supplementary Tables S5.1 – S5.12, Additional file 2) in the first five years after AA diagnosis.                                                                                                             |

**Table 1:** Primary endpoints. \*Exclusion diagnoses are; any form of scarring alopecia, (53) traction alopecia, congenital alopecia, androgenetic alopecia, telogen effluvium, tinea capitis, trichotillomania, or secondary syphilis of the scalp (See Supplementary Table S1.1, Additional file 2)



## 2.5 Secondary endpoints

None

## 2.6 Other exploratory analyses

Study 1: Explore the incidence of AA by age (children) and age group (adults [18-30], [30-40], [50-60], [60,70], [70-80],  $\geq 80$ ). These age groups are provisional. If, during exploratory analysis, we find that these age groups obscure the true incidence of AA (for example if AA incidence rates change substantially across one of these age groups) then we may modify these groupings. Any changes will be clearly stated as such in a final manuscript.

## 3 General Study Design and Plan

The proposed studies will use the retrospectively collected data of all eligible patients within Oxford-Royal College of General Practitioners Research and Surveillance Centre database (RCGP RSC) at the date of data extraction. The RCGP RSC database incorporates pseudonymised primary care records from up to 200 GP practices distributed across England. Details of the cohort included in the database have been published previously. (54) The RCGP RSC cohort size (as of January 2019) is over 2.6 million actively registered patients, and historic records available for up to 5.2 million patients over the last 20 years. The cohort provides a broadly representative sample of the UK population.

The study period for study 2 and study 3 incidence analyses will be ten-years starting January 1, 2009 and ending December 31, 2018 inclusive.

For study 4, we will start data collection from the beginning of 2004 when the quality and outcomes framework was first introduced in primary care. The study period will end December 31, 2018.

### 3.1 Study Design

These are non-interventional studies. A range of study designs will be used across the studies as follows:

#### 3.1.1 Study 1:

Cross-sectional design (incidence and prevalence of AA). Cohort design to assess healthcare utilisation in people with AA.

#### 3.1.2 Study 2:

Case-control design for prevalence of mental health conditions (depressive episodes, recurrent depressive disorder and anxiety disorder) at AA diagnosis. Matched-cohort design for incidence of such conditions in the first two years after AA diagnosis in the subset of adult people diagnosed with AA without a mental health condition at baseline (and excluding controls if they have a baseline mental health condition).

#### 3.1.3 Study 3:

Case-control design for prevalence of atopic and autoimmune conditions at AA diagnosis. Matched-cohort design for incidence of atopic and autoimmune conditions in the first five years after AA diagnosis in the subset of adult people diagnosed with AA without an atopic/autoimmune condition at baseline (and excluding controls if they have a baseline atopic/autoimmune condition).



### 3.1.4 Study 4:

Matched-cohort design for incidence of common infections in the first five years after AA diagnosis in the subset of people diagnosed with AA without a common infection at baseline (and excluding controls if they have a baseline common infection).

## 3.2 Data source and Read codes

The case and control cohorts will be identified from the RCGP RSC database. The RCGP RSC database contains complete data on all events and clinical entities coded in UK primary care. These include demographic information, clinical diagnoses, laboratory test results, primary care issued prescriptions, process of care codes (e.g. specialist dermatology reviews), and anthropometric measurements (e.g. body mass index (BMI)), and are coded using the Read Coding system. (55) Read code lists used to define variables have been developed in accordance with published guidelines. (55)

## 3.3 Data extraction

Individual patient data will be anonymised at the point of data extraction. All data will remain in anonymised form and will be held on a secure server at the University of Surrey. The data will not be used for any purposes other than for the research which is described in the respective protocols and which has been approved by the RCGP RSC Research Committee. The sponsor, Pfizer Ltd, will not have access to the individual anonymised patient data.

Queries will be executed to extract relevant data from the Structured Query Language (SQL) database using the Read code listed in Additional file 2.

## 3.4 Inclusion-Exclusion Criteria and General Study Population

### 3.4.1 AA definition

We will identify people diagnosed with AA using diagnosis Read codes which are specific to the condition (see Supplementary Table S1.1 (AA section), Additional file 2). A person will be considered to have a confirmed AA diagnosis if they have one or more of these diagnoses Read codes and no code for an alternative diagnosis in the subsequent 365 days. Alternative diagnoses which merit exclusion comprise any form of scarring alopecia, (53) traction alopecia, congenital alopecia, androgenetic alopecia, telogen effluvium, tinea capitis, trichotillomania, or secondary syphilis of the scalp (see Supplementary Table S1.1, Additional file 2). We will identify all incident cases of AA meeting this case definition over the study period which will form the case cohorts for the four studies. We will also extract data on the extent of the alopecia where this has been recorded (See Supplementary Table S1.2, Additional file 2).

Study 2 will identify three groups of common mental health conditions defined by the International Statistical Classification of Diseases and Related Health Problems 10th Revision (ICD10) classification (56) (depressive episodes (F32), recurrent depressive disorder (F33), and non-phobia related anxiety disorders (F41)) identified using algorithms validated in UK primary care. (57)

Study 3 will identify atopic conditions and autoimmune conditions respectively (Supplementary Tables S4.1 – S4.16, Additional file 2) using diagnostic Read codes.

Autoimmune conditions were selected based on a combination of expert knowledge and a minimum background population prevalence of 0.3% in the general population (refer to section 4.1.3). Case definition using Read codes for atopic dermatitis has been previously validated. An ontologically driven case definition is used for both allergic rhinitis and asthma. (55)

Study 4 will identify common infections using diagnostic Read codes (Supplementary Tables S5.1 – S5.12, Additional file 2).

### 3.5 Baseline socio-economic characteristics

Age, sex, socio-economic status (SES), and ethnicity will comprise the socio-economic factors used for stratification of the outcome measures. Ethnicity will be categorized as follows in accordance with the major UK census categories: (58, 59) White, Asian, Black African/Caribbean, Mixed, Other and not recorded. Deprivation will be defined using the official national deprivation measure; index of multiple deprivation (IMD). (60) This will be calculated at the point of data extraction, using patient postcode, with the resultant scores stratified by deprivation quintile according to the national distribution.

### 3.6 Epidemiology of AA

This will comprise of the incidence of AA over the study period (stratified by age group, sex ethnicity, and SES) and point prevalence (stratified by age and sex). The study will also describe the geographic distribution of AA by region across England.

### 3.7 Current service utilisation and management patterns

Current service utilisation will comprise of annual primary care visit rates, in Study 1 we will compare primary care visit frequency in people with AA and matched controls without AA.

The management patterns will comprise of an assessment of the percentage of the people with AA having a secondary care review (by dermatology (study 1) or mental health services (study 2)), and an assessment of primary care medication prescriptions issued to treat AA (Supplementary Table S1.4, Additional file 2). Primary care visits, secondary care reviews and medication to treat AA will all be limited to those within 365 days of AA diagnosis.

### 3.8 Mental health treatment, sick day, and unemployment burden

This will comprise of the rates for medications and psychological interventions used to treat mental health conditions in people diagnosed with AA. Antidepressant medication classes to be examined comprise; selective serotonin reuptake inhibitors (SSRIs) and related medications (serotonin and norepinephrine reuptake inhibitors; SNRIs), tricyclic antidepressants (TCAs) and related medications (tetracyclic antidepressant TeCAs), and monoamine oxidase inhibitors (MOAIs). Anxiolytic medications to be examined comprise all benzodiazepines and other related medications indicated for use in anxiety states. Psychological interventions comprise of will comprise; referral rates for counselling, secondary care psychiatrist referrals, including the referrals to the clinical psychology services/specialists and UK Improving Access to Psychological Therapies (IAPT) program. (61) (Supplementary Table S2.10, Additional file 2).

1 Additional mental health conditions consist of adjustment disorder, agoraphobia, self-harm,  
2 and overdose/parasuicide attempts and will be identified using the presence of one or more  
3 diagnosis codes appearing in the clinical record (Supplementary Tables S2.5 – S2.9,  
4 Additional file 2).

5  
6 Unemployment will be identified using Read codes relating to unemployment recorded in  
7 the primary care record or the issuing of IB113 or ESA113 forms (Supplementary Table S3.1,  
8 Additional file 2). Sick days will be indicated by the issuing of Med 3 certification from  
9 primary care (Statement of Fitness for Work certification) (Supplementary Table S3.2,  
10 Additional file 2).

## 14 4 Sample size calculations

15  
16 In the controls, the prevalence of common conditions (e.g. depressive episodes) is assumed  
17 to be 10%, less common conditions are assumed to be 1% and rare conditions (e.g. multiple  
18 sclerosis) assumed to be 0.1%. Sample size calculations were performed in OpenEpi, (62)  
19 results are presented using methods of Kelsey.(63)

### 21 4.1.1 Study 1

22  
23 The analysis of the primary endpoint is a descriptive analysis of the incidence and  
24 prevalence of AA, and no sample size calculation is therefore applicable.

25  
26 Our inclusion criteria specify all people with a confirmed diagnosis of AA will be included  
27 for analysis. The RCGP RSC database contains information on around 2 million actively  
28 registered patients. Based on an AA prevalence of 0.2% (13), we would anticipate a sample  
29 size of around 4,000 people diagnosed with AA for this study.

### 32 4.1.2 Study 2

33  
34 Assuming 80% power, a 5% level of statistical significance, and a background population  
35 prevalence of 15% for anxiety and 10% for depression, (64) our anticipated sample size for  
36 AA (n = 4,000) would be sufficient to detect a prevalence difference of 1.8% in anxiety  
37 between those with and without AA, and 1.5% difference in depression between those with  
38 and without AA.

### 42 4.1.3 Study 3

43  
44 A sample size calculation is applicable to estimate the incidence of atopic and autoimmune  
45 conditions in people diagnosed with AA. There is, however, a paucity of large-scale  
46 epidemiological data exploring the association between AA and either atopic or  
47 autoimmune conditions on which to base the sample size calculations for this study.

48  
49 A large population-based study based in Taiwan (65) found associations between the  
50 presence of AA and the presence of atopic dermatitis (OR 2.24, 95% CI 1.95-2.58) and  
51 allergic rhinitis (OR 1.29, 95% CI 1.18-1.41), and with the autoimmune condition psoriasis  
52 (OR 2.80, 95% CI 2.24-3.50). No associations were found in either asthma (atopic) or RA  
53 (autoimmune). Applying an estimate informed by this study of OR 2.0 for atopic conditions  
54 and OR 2.8 for autoimmune conditions, assuming 80% power, a 5% level of statistical  
55 significance, a 4:1 ratio of controls to cases and a probability of outcome in the control  
56 cohort of 1% (less common condition prevalence) for both atopic and autoimmune  
57 conditions, a total (both cases and controls) sample size of 6,034 for atopic conditions  
58 (1,207 cases and 4,827 controls) and 2,133 for autoimmune conditions (427 cases and  
59 1,706 controls).

1,706 controls) would be required to detect statistically significant differences between people diagnosed with AA and the control populations.

For the assessment of prevalence of co-existing autoimmune conditions, assuming 80% power, a 5% level of statistical significance, our anticipated sample size for AA (n = 4,000) and an OR 2.0 effect, we would have sufficient power to detect a difference between those with and without AA in autoimmune conditions having  $\geq 0.3\%$  background population prevalence.

#### 4.1.4 Study 4

A sample size calculation is applicable to estimate the incidence of common infections in people diagnosed with AA. There is, however, no previous data exploring the association between AA and common infections on which to base the sample size calculations for this study. We therefore estimate the number of people diagnosed with AA we will have for this study (n = 4,000) and use this number to estimate the minimum effect size we are powered to detect. Based on a Cox PH model, 80% power, a 5% level of statistical significance and a 4:1 ratio of controls to cases, we would have sufficient power to detect a difference between those with and without AA in common infections having  $\geq 0.46\%$  background population prevalence.

## 5 Populations to be analysed

### 5.1 Inclusion Criteria

The cohorts for studies 1, 2 and 3 (cases and controls) will consist of patients contributing to RCGP RCS database during the study period (between January 1, 2009 and December 31, 2018 inclusive). The cohorts for study 4 (cases and controls) will consist of patients contributing to RCGP RCS database between January 1, 2004 and December 31, 2018 inclusive.

The AA prevalence population consists of patients actively registered and alive at the end date of the study period (December 31, 2018).

The AA incidence population consists of patients registered at any point during the study period but without a prior recorded AA diagnosis. The follow-up period for incident cases will begin on the latest of the date of diagnosis indicated by the first diagnostic AA Read code. Follow-up will end at the earliest of the study end-date (December 31, 2018), the date of patient transfer from an included practice or date of death.

Studies 1 and 4 will include both children and adults. Studies 2 and 3 will include only people aged  $\geq 18$  (as at date of AA diagnosis for cases or start of follow-up for controls). Only people aged  $\geq 18$  and  $\leq 65$  will be included in the unemployment and sick day analysis (Study 2).

### 5.2 Exclusion Criteria

The following exclusion criteria will be applied:

- People with the alternative non-AA diagnoses (section 3.4.1) (AA incidence cohort).
- People with AA diagnosis within 6 months of registration (AA incidence cohort).
- People with less than 1 year of follow up within the dataset (unless under 1 year old) (AA incidence and AA prevalence cohorts).

### 5.3 Matching process

The control cohorts will be defined by matching cases with people who have never been diagnosed with AA either prior to or during the study period, by age, sex, and time since practice registration, at GP practice level. After matching an assessment of sociodemographic differences using IMD quintiles will be performed. If there are substantial differences in socioeconomic status between cases and controls, re-matching with IMD as an additional matching criterion will be considered

Controls will require at least one year of follow-up when matched to minimize the risk of a non-recorded existing diagnosis of AA. The follow-up period for each matched control will begin at the start of follow-up of their matched case and have the same follow-up time criteria applied (where applicable).

Each case is matched with four controls using a nearest neighbour matching algorithm (66) to create a baseline matched dataset.

Study 1 will include all matched patients to compare rates of primary care visits. Study 2 (incidence of mental health after AA diagnosis) and study 3 (incidence of atopic and autoimmune conditions) will both use a subset of the baseline matched dataset; cases will be people diagnosed with AA without the relevant condition at their start of follow up, controls will be people not diagnosed with AA and without the relevant condition at their start of follow up.

The matching for the incidence of common infections (study 4) will use a different approach to studies 2 and 3: cases will be people diagnosed with AA on or before 1<sup>st</sup> January 2014 (exact date will be dependent on data availability) without the relevant infection, controls will be people not diagnosed with AA prior to this date and without the relevant infection. People who develop AA during the follow up will be excluded from the pool of available cohorts prior to matching. This approach will mitigate systematic recording bias that is likely due to an increased propensity of people with incident AA to consult within the months following diagnosis.

The case-control design studies (prevalence of mental health at AA diagnosis (study 2), and prevalence of atopic and autoimmune conditions at AA diagnosis (study 3)) will both define cases as people newly diagnosed with AA over the study period. For each case, the prevalence of the conditions of interest as at the date of AA diagnosis will be retrospectively established. Controls will be people not diagnosed with AA. For each control, the date of AA diagnosis of their matched case counterpart will then be used as the baseline date and the prevalence of the conditions of interest on that date will be retrospectively established.

In Study 2 and Study 3, the same baseline cases and control cohorts will be used for both the case-control and matched-cohort analyses.

### 5.4 AA definition exploratory analyses

To check the validity of our AA definition (section 3.4.1), annual incident trends of specified alopecia (AA), (Supplementary Table S1.1, Additional file 2), non-specific alopecia (Supplementary Table S1.1, Additional file 2) and other specified alopecia (Supplementary Table S1.1, Additional file 2) will be analysed for the purpose of identifying changes in coding practice. The AA case definition may be amended based on the results of this analysis if considered appropriate and necessary. Any changes required will be reported in full in a final study publication.



## 6 Statistical Analysis

### 6.1 Statistical principles

The mean, standard deviation (sd) and any other statistical measures, will be reported to one decimal place. Continuous data will be summarised in the form of means, sd, median, interquartile range (IQR) and range as appropriate. Categorical data will be summarised using frequencies and proportions. Chi-squared and t-tests will be performed to compare the frequency of dichotomous variables and the values of continuous variables where relevant. 95% CIs will be reported for main effect sizes. Statistical significance will be assessed using  $p < 0.05$ . Actual p-values will be reported except for p-values less than 3 decimal places which will be reported as " $< 0.001$ ". P-values  $> 0.1$  will be reported to one decimal place, p-values between 0.01 and 0.1 will be reported to 2 decimal places, and p-values between 0.001 and 0.01 will be reported to three decimal places.

The assessment of any associations with baseline characteristics and the outcomes of interest (mental health conditions (study 2), autoimmune and atopic conditions (study 3) and common infections (study 4)) will be assessed using logistic regression, Cox proportional hazards models, Poisson regression or zero-inflated Poisson regression as appropriate depending on the characteristics of the outcome variable. A standard set of features will be used in all multivariable models: age, sex, ethnicity, socioeconomic status, BMI, smoking status, alcohol status, and historical propensity to consult (defined as the number of primary care visits an individual has in the year prior to their study start date). Specific co-morbidity adjustment will be specific to each analysis.

Assumptions of statistical approaches will be assessed, and transformations used if necessary (although it is not anticipated that the data will violate model assumptions).

### 6.2 Primary Endpoint Analysis

#### 6.2.1 Study 1

**AA incidence:** Incident cases will be defined as people with a first ever diagnostic Read code for AA during the study period. To ensure cases are truly incident, people with an AA diagnosis within six months of registering with a practice will be excluded from the analysis (unless under one year old). Incidence of new onset AA will be calculated by dividing the total number of new cases by the total person-years of follow-up for the total eligible population over the study period. Incidence rates will be reported for the complete cohort and stratified by calendar year, sex and age (categorised), and SES factors. Adjusted incidence rates by socio-demographic factors (including geographic area classification) will be estimated using Poisson regression.

**AA point prevalence:** Prevalence cases will be defined as all people with a historical diagnostic Read code for AA and no exclusion code within one year of AA diagnosis. For this prevalence analysis all people will be included regardless of the date of AA diagnosis in relation to the date of registration with a practice. Cases with  $< 365$  days of follow up from date of registration will be excluded from the analysis (unless under one year old). Point prevalence will be calculated by dividing the number of prevalent cases by the total number of eligible people in the study population at the study end date (December 31, 2018). Point prevalence will be reported for the complete cohort and stratified by sex and age (categorised).

1 We anticipate some attrition of recording of AA in the historic records. This is particularly  
2 likely to be the case in records preceding the computerisation of primary care which  
3 occurred in the 1990s. If we observe evidence of this being a major source of error in our  
4 point calculations (as evidenced by a falling point incidence in the older adult population  
5 despite there being a substantial number of incident diagnoses in this age group) then we  
6 will consider using the actuarial life table method to estimate lifetime AA risk (67).  
7

8 **Service utilisation and management patterns:** Service utilisation will be evaluated by  
9 calculation of the annual rates of primary care visits for people diagnosed with AA in the  
10 year following diagnosis. Primary care visits will be identified from the patient's electronic  
11 health record.  
12

13  
14 Management patterns will be evaluated by calculation of annual proportion of people  
15 referred for dermatology review in people diagnosed with AA in the year following  
16 diagnosis. Secondary care dermatology reviews will be identified from Read codes.  
17

18  
19 In addition, management patterns will also comprise of the percentage of people diagnosed  
20 with AA and prescribed AA medication, in primary care, grouped by medication class during  
21 the year following diagnosis. Prescription information will be identified using Read and  
22 EMIS codes.  
23

## 24 6.2.2 Study 2

25  
26 **Prevalence of mental health conditions:** Prevalence will be calculated by dividing the  
27 number of prevalent people at the study start date by the total number of eligible people in  
28 the study population at the same time point.  
29

30  
31 The prevalence of each common mental health condition (depressive episodes, recurrent  
32 depressive disorder and anxiety disorder) category for people diagnosed with AA will be  
33 reported in Study 2 and compared to the prevalence in the control population without AA.  
34 The prevalence of mental health conditions by socio-demographic subgroups will also be  
35 reported.  
36

37  
38 **Incidence of mental health conditions:** Incident cases will be defined as in Study 1.  
39 Incidence rates of mental health conditions (depressive episodes, recurrent depressive  
40 disorder and anxiety disorder) within two years of diagnosis date (matched follow-up start  
41 date for controls) will be calculated in both cases and controls and compared.  
42

43  
44 Risk of developing a mental health condition (grouped by mental health condition category)  
45 will be examined using time to failure analysis. Initially, unadjusted Cox proportional  
46 hazards models, stratified by matched set (AA versus non-AA), will be used to provide  
47 overall hazard ratios (HRs) as summary estimates for the association of the presence of AA  
48 with the time to each mental health condition category in separate models. Models will be  
49 subsequently adjusted for standard set factors (section 6.1) and comorbidities (type 2  
50 diabetes (T2DM), hypertension, atrial fibrillation, angina, acute myocardial infarction,  
51 stroke, heart failure, chronic liver disease, dementia, RA, asthma, Chronic obstructive  
52 pulmonary disease, Chronic Kidney Disease stage 3-5 (CKD), malignancy and inflammatory  
53 bowel disease) in multivariable analysis.  
54

55  
56 **Mental health treatment and management patterns:** The burden of treatment for  
57 mental health conditions will be evaluated as the total percentage of people diagnosed with  
58  
59  
60

AA and prescribed, within one year of AA diagnosis, a medication used to treat mental health conditions (section 3.8) (e.g. SSRIs), grouped by mental health condition category.

Management patterns will be evaluated by calculation of annual proportion of people referred for psychiatrist referral and counselling in people diagnosed with AA in the year following diagnosis (Supplementary Table S2.10, Additional file 2).

### 6.2.3 Study 3

**Prevalence of atopic and autoimmune conditions:** The prevalence of atopic and autoimmune conditions in both cases and controls will be reported and compared.

**Incidence of atopic and autoimmune conditions:** Incidence rates of atopic and autoimmune conditions within five years of diagnosis date (matched follow-up start date for controls) will be calculated in both cases and controls and compared.

Risk of developing an atopic or autoimmune condition will be examined using time to failure analysis. Initially, unadjusted Cox proportional hazards models, stratified by matched set (AA versus non-AA), will be used to provide overall HRs as summary estimates for the association of the presence of AA with the time to each of atopic and autoimmune conditions in separate models. Models will be subsequently adjusted for standard set factors (section 6.1) and comorbidities (hypertension, hyperlipidaemia, T2DM, peripheral arterial disease, atrial fibrillation, angina, myocardial infarction, stroke, heart failure, CKD, chronic obstructive pulmonary disorder (COPD), chronic liver disease, malignancy, dementia, fracture history, depression) in multivariable analysis.

### 6.2.4 Study 4

**Incidence of common infections:** Incidence rates of common infections within five years of diagnosis date (matched follow-up start date for controls) will be calculated at both overall and individual infection levels in both cases and controls and compared. : Initially, infection incidence rates in people with and without AA will be estimated by dividing the number of incident common infections by the sum of person-years of follow-up for each cohort over the period of interest. Unadjusted Poisson regression models, stratified by matched set (AA versus controls), will be used to provide overall incident rate ratios as summary estimates for the association between rates of common infections and the presence of AA. Models will subsequently be adjusted for standard set factors (section 6.1) and comorbidities (hypertension, hyperlipidaemia, T2DM, peripheral arterial disease, atrial fibrillation, angina, myocardial infarction, stroke, heart failure, CKD, COPD, chronic liver disease, malignancy, dementia, RA, depression).

## 6.3 Secondary Objective Analysis

### 6.2.1 Study 1

**Geographical distribution of AA:** The geographic distribution of people with AA will be calculated from the disease incidence. The adjusted incident rate ratios will be reported. Models will be adjusted for age category, sex, ethnicity, IMD and geographic area classification derived using patient postcode at the point of data extraction.

### 6.2.2 Study 2

**Stratified prevalence of mental health conditions:** The prevalence of mental health conditions (depressive episodes, recurrent depressive disorder and anxiety disorder) by sociodemographic subgroups will also be reported in both cases and controls.



1 **Additional mental health conditions:** The prevalence of additional mental health  
2 conditions (adjustment disorder, agoraphobia, self-harm, and overdose/parasuicide  
3 attempts) will be estimated as the total percentage of people diagnosed with AA and with  
4 the presence of one or more diagnosis codes appearing in the clinical record  
5  
6

7 **Sick day and unemployment burden:** The burden of sick days will be estimated as the  
8 total percentage of people diagnosed with AA and issued one or more Med 3 certificate. The  
9 burden of unemployment will be estimated as the total percentage of people diagnosed with  
10 AA and with a Read code relating to unemployment recorded in the primary care record or  
11 an IB113 or ESA113 form issued.  
12  
13

### 14 6.2.3 Study 3

15 Not applicable.  
16

### 17 6.2.4 Study 4

18 Not applicable.  
19  
20  
21  
22  
23  
24

## 25 6.4 Sensitivity analysis

26  
27  
28 Study 2: Sensitivity analyses will be performed to compare the baseline prevalence and  
29 incidence over two years post alopecia diagnosis of the three primary mental health  
30 conditions (depressive episodes, recurrent depressive disorder and anxiety disorder) in  
31 people with non-specific alopecia codes only (i.e. no prior or subsequent codes specifying  
32 alopecia type) using the same matching process used for the primary analyses.  
33  
34

35 Study 3: We will replicate this sensitivity analysis to compare the baseline prevalence and  
36 incidence of atopic and autoimmune conditions in people with non-specific alopecia codes  
37 only.  
38  
39

40 Study 4: In the common infections theme, we will use a survival model to investigate time  
41 to first infection. We will also compare the results of the study outcomes when 1) we  
42 increase the number of cases to include people who develop AA during the follow up and 2)  
43 use a similar matching approach to the other studies: perform matching using the time of  
44 AA diagnosis and follow for up to five years after diagnosis (or matched date for controls).  
45 Both of these approaches will be used to investigate the effect of bias.  
46  
47  
48

## 49 6.5 Missing data

50 These studies will use the missing indicator variable method as missing data are considered  
51 likely not to be missing at random, meaning multiple imputation approaches will lack  
52 validity.  
53  
54

55 Patient will need to be excluded from analyses based on a matched design if they have  
56 incomplete data in the fields (age, sex) required to run the matching process. In similar  
57 studies, the exclusion rate due to incomplete data has been low (68, 69).  
58  
59  
60

## 7 Study Limitations

These are discussed in the associated protocol manuscript.

## 8 Statistical software

All statistical analyses will be performed using R software.

## 9 Ethics

Study approval will be requested from the Research Committee of the RCGP RSC. These studies do not meet the requirements for formal ethics board review in their current form as defined using the NHS Health Research Authority research decision tool (<http://www.hra-decisiontools.org.uk/research/>).

The study will be conducted in accordance with legal and regulatory requirements, as well as with scientific purpose, value, and rigor and follow generally accepted research practices described in Guidelines for Good Pharmacoepidemiology Practices (GPP) issued by the International Society for Pharmacoepidemiology (ISPE), and Good Epidemiological Practice (GEP) guidelines issued by the International Epidemiological Association (IEA). Study reporting will be conducted in accordance with the relevant EQUATOR (Enhancing the QUALity and Transparency Of health Research) guidelines.

## 10 Acknowledgements

Medical writing support was provided by Louise Jordan at Momentum Data and was funded by Pfizer. Editorial support was provided by Anita Lynam, Andrew McGovern, and John Dennis at Momentum Data and was funded by Pfizer. The authors would like to acknowledge project management support from Filipa Ferreira of the University of Oxford and University of Surrey. Matthew Harries was supported by the NIHR Manchester.

## References

1. Hordinsky MK. Overview of alopecia areata. *J Investig Dermatol Symp Proc.* 2013;16(1):S13-5.
2. Alkhalifah A, Alsantali A, Wang E, McElwee KJ, Shapiro J. Alopecia areata update: part I. Clinical picture, histopathology, and pathogenesis. *Journal of the American Academy of Dermatology.* 2010;62(2):177-88, quiz 89-90.
3. Madani S, Shapiro J. Alopecia areata update. *Journal of the American Academy of Dermatology.* 2000;42(4):549-66; quiz 67-70.
4. Mirzoyev SA, Schrum AG, Davis MDP, Torgerson RR. Lifetime incidence risk of alopecia areata estimated at 2.1% by Rochester Epidemiology Project, 1990-2009. *J Invest Dermatol.* 2014;134(4):1141-2.
5. Villasante Fricke AC, Miteva M. Epidemiology and burden of alopecia areata: a systematic review. *Clin Cosmet Investig Dermatol.* 2015;8:397-403.
6. Richard MA, Corgibet F, Beylot-Barry M, Barbaud A, Bodemer C, Chaussade V, et al. Sex- and age-adjusted prevalence estimates of five chronic inflammatory skin diseases in France: results of the << OBJECTIFS PEAU >> study. *J Eur Acad Dermatol Venereol.* 2018;32(11):1967-71.
7. Harries MJ, Sun J, Paus R, King LE. Management of alopecia areata. *BMJ.* 2010;341:c3671.
8. Cochrane. Treatments for alopecia areata, alopecia totalis and alopecia universalis. 2008.
9. Lee S, Lee H, Lee CH, Lee WS. Comorbidities in alopecia areata: A systematic review and meta-analysis. *Journal of the American Academy of Dermatology.* 2019;80(2):466-77.e16.
10. Huang KP, Mullangi S, Guo Y, Qureshi AA. Autoimmune, atopic, and mental health comorbid conditions associated with alopecia areata in the United States. *JAMA Dermatol.* 2013;149(7):789-94.
11. Montgomery K, White C, Thompson A. A mixed methods survey of social anxiety, anxiety, depression and wig use in alopecia. *BMJ open.* 2017;7(4):e015468.
12. Hunt N, McHale S. The psychological impact of alopecia. *BMJ.* 2005;331(7522):951-3.
13. Safavi K. Prevalence of alopecia areata in the First National Health and Nutrition Examination Survey. *Arch Dermatol.* 1992;128(5):702.
14. Sharma VK, Dawn G, Kumar B. Profile of alopecia areata in Northern India. *Int J Dermatol.* 1996;35(1):22-7.
15. Tan E, Tay YK, Goh CL, Chin Giam Y. The pattern and profile of alopecia areata in Singapore--a study of 219 Asians. *Int J Dermatol.* 2002;41(11):748-53.
16. Yang S, Yang J, Liu JB, Wang HY, Yang Q, Gao M, et al. The genetic epidemiology of alopecia areata in China. *Br J Dermatol.* 2004;151(1):16-23.
17. Guzmán-Sánchez DA, Villanueva-Quintero GD, Alfaro Alfaro N, McMichael A. A clinical study of alopecia areata in Mexico. *Int J Dermatol.* 2007;46(12):1308-10.
18. Furue M, Yamazaki S, Jimbow K, Tsuchida T, Amagai M, Tanaka T, et al. Prevalence of dermatological disorders in Japan: a nationwide, cross-sectional, seasonal, multicenter, hospital-based study. *J Dermatol.* 2011;38(4):310-20.
19. Singam V, Patel KR, Lee HH, Rastogi S, Silverberg JI. Association of alopecia areata with hospitalization for mental health disorders in US adults. *Journal of the American Academy of Dermatology.* 2019;80(3):792-4.
20. Sellami R, Masmoudi J, Ouali U, Mnif L, Amouri M, Turki H, et al. The relationship between alopecia areata and alexithymia, anxiety and depression: a case-control study. *Indian J Dermatol.* 2014;59(4):421.
21. Ruiz-Doblado S, Carrizosa A, García-Hernández MJ. Alopecia areata: psychiatric comorbidity and adjustment to illness. *Int J Dermatol.* 2003;42(6):434-7.
22. Baghestani S, Zare S, Seddigh SH. Severity of Depression and Anxiety in Patients with Alopecia Areata in Bandar Abbas, Iran. *Dermatol Reports.* 2015;7(3):6063.

23. Chu SY, Chen YJ, Tseng WC, Lin MW, Chen TJ, Hwang CY, et al. Psychiatric comorbidities in patients with alopecia areata in Taiwan: a case-control study. *Br J Dermatol.* 2012;166(3):525-31.
24. Vallerand IA, Lewinson RT, Parsons LM, Hardin J, Haber RM, Lowerison MW, et al. Assessment of a Bidirectional Association Between Major Depressive Disorder and Alopecia Areata. *JAMA Dermatol.* 2019.
25. Paus R, Ito N, Takigawa M, Ito T. The hair follicle and immune privilege. *J Investig Dermatol Symp Proc.* 2003;8(2):188-94.
26. Barahmani N, Schabath MB, Duvic M. History of atopy or autoimmunity increases risk of alopecia areata. *Journal of the American Academy of Dermatology.* 2009;61(4):581-91.
27. Chen C-H, Wang K-H, Lin H-C, Chung S-D. Follow-up study on the relationship between alopecia areata and risk of autoimmune diseases. *The Journal of Dermatology.* 2016;43(2):228-9.
28. Tosti A. Practice gaps. Alopecia areata and comorbid conditions. *JAMA Dermatol.* 2013;149(7):794.
29. Tan E, Tay YK, Giam YC. A clinical study of childhood alopecia areata in Singapore. *Pediatr Dermatol.* 2002;19(4):298-301.
30. Jagielska D, Redler S, Brockschmidt FF, Herold C, Pasternack SM, Garcia Bartels N, et al. Follow-up study of the first genome-wide association scan in alopecia areata: IL13 and KIAA0350 as susceptibility loci supported with genome-wide significance. *J Invest Dermatol.* 2012;132(9):2192-7.
31. Bhardwaj EK, Trüeb RM. Acute diffuse and total alopecia of the female scalp associated with borrelia-infection. *International journal of trichology.* 2015;7(1):26-8.
32. Cho M, Cohen PR, Duvic M. Vitiligo and alopecia areata in patients with human immunodeficiency virus infection. *Southern medical journal.* 1995;88(4):489-91.
33. Gil Montoya JA, Cutando Soriano A, Jimenez Prat J. Alopecia areata of dental origin. *Medicina oral : organo oficial de la Sociedad Espanola de Medicina Oral y de la Academia Iberoamericana de Patologia y Medicina Bucal.* 2002;7(4):303-8.
34. Ito T, Tokura Y. Alopecia areata triggered or exacerbated by swine flu virus infection. *The Journal of dermatology.* 2012;39(10):863-4.
35. Jackow C, Puffer N, Hordinsky M, Nelson J, Tarrand J, Duvic M. Alopecia areata and cytomegalovirus infection in twins: genes versus environment? *Journal of the American Academy of Dermatology.* 1998;38(3):418-25.
36. Offidani A, Amerio P, Bernardini ML, Feliciani C, Bossi G. Role of cytomegalovirus replication in alopecia areata pathogenesis. *Journal of cutaneous medicine and surgery.* 2000;4(2):63-5.
37. Paoletti V, Mammarella A, Basili S, Paradiso M, Di Franco M, De Matteis A, et al. Prevalence and clinical features of skin diseases in chronic HCV infection. A prospective study in 96 patients. *Panminerva medica.* 2002;44(4):349-52.
38. Richardson CT, Hayden MS, Gilmore ES, Poligone B. Evaluation of the Relationship between Alopecia Areata and Viral Antigen Exposure. *American journal of clinical dermatology.* 2018;19(1):119-26.
39. Kartal ED, Alpat SN, Ozgunes I, Usluer G. Reversible alopecia universalis secondary to PEG-interferon alpha-2b and ribavirin combination therapy in a patient with chronic hepatitis C virus infection. *European journal of gastroenterology & hepatology.* 2007;19(9):817-20.
40. Abdel Hafez HZ, Mahran AM, Hofny EM, Attallah DAA, Sayed DS, Rashed H. Alopecia areata is not associated with *Helicobacter pylori*. *Indian journal of dermatology.* 2009;54(1):17-9.
41. Domínguez-Andrés J, Netea MG. Impact of Historic Migrations and Evolutionary Processes on Human Immunity. *Trends in Immunology.* 2019;40(12):1105-19.
42. Dubois PC, Trynka G, Franke L, Hunt KA, Romanos J, Curtotti A, et al. Multiple common variants for celiac disease influencing immune gene expression. *Nat Genet.* 2010;42(4):295-302.

- 1 43. Hung SC, Hou T, Jiang W, Wang N, Qiao SW, Chow IT, et al. Epitope Selection for HLA-  
2 DQ2 Presentation: Implications for Celiac Disease and Viral Defense. *J Immunol.*  
3 2019;202(9):2558-69.
- 4 44. Zhernakova A, Elbers CC, Ferwerda B, Romanos J, Trynka G, Dubois PC, et al.  
5 Evolutionary and functional analysis of celiac risk loci reveals SH2B3 as a protective factor  
6 against bacterial infection. *Am J Hum Genet.* 2010;86(6):970-7.
- 7 45. Kucharzik T, Maaser C. Infections and Chronic Inflammatory Bowel Disease.  
8 *Viszeralmedizin.* 2014;30(5):326-32.
- 9 46. Toruner M, Loftus EV, Jr., Harmsen WS, Zinsmeister AR, Orenstein R, Sandborn WJ, et  
10 al. Risk factors for opportunistic infections in patients with inflammatory bowel disease.  
11 *Gastroenterology.* 2008;134(4):929-36.
- 12 47. Brassard P, Bitton A, Suissa A, Sinyavskaya L, Patenaude V, Suissa S. Oral  
13 Corticosteroids and the Risk of Serious Infections in Patients With Elderly-Onset Inflammatory  
14 Bowel Diseases. *The American journal of gastroenterology.* 2014;109:1795.
- 15 48. Lichtenstein GR, Feagan BG, Cohen RD, Salzberg BA, Diamond RH, Chen DM, et al.  
16 Serious infections and mortality in association with therapies for Crohn's disease: TREAT registry.  
17 *Clinical gastroenterology and hepatology : the official clinical practice journal of the American*  
18 *Gastroenterological Association.* 2006;4(5):621-30.
- 19 49. Lichtenstein GR, Feagan BG, Cohen RD, Salzberg BA, Diamond RH, Price S, et al.  
20 Serious infection and mortality in patients with Crohn's disease: more than 5 years of follow-up  
21 in the TREAT registry. *The American journal of gastroenterology.* 2012;107(9):1409-22.
- 22 50. Fardet L, Petersen I, Nazareth I. Common Infections in Patients Prescribed Systemic  
23 Glucocorticoids in Primary Care: A Population-Based Cohort Study. *PLOS Medicine.*  
24 2016;13(5):e1002024.
- 25 51. Nikiphorou E, de Lusignan S, Mallen C, Khavandi K, Roberts J, Buckley CD, et al.  
26 Haematological abnormalities in new-onset rheumatoid arthritis and risk of common infections:  
27 a population-based study. *Rheumatology.* 2019.
- 28 52. Gilhar A, Keren A, Paus R. JAK inhibitors and alopecia areata. *The Lancet.*  
29 2019;393(10169):318-9.
- 30 53. Olsen EA, Bergfeld WF, Cotsarelis G, Price VH, Shapiro J, Sinclair R, et al. Summary of  
31 North American Hair Research Society (NAHRS)-sponsored Workshop on Cicatricial Alopecia,  
32 Duke University Medical Center, February 10 and 11, 2001. *Journal of the American Academy*  
33 *of Dermatology.* 2003;48(1):103-10.
- 34 54. Correa A, Hinton W, McGovern A, van Vlymen J, Yonova I, Jones S, et al. Royal College  
35 of General Practitioners Research and Surveillance Centre (RCGP RSC) sentinel network: a  
36 cohort profile. *BMJ open.* 2016;6(4):e011092.
- 37 55. de Lusignan S, Liaw ST, Michalakidis G, Jones S. Defining datasets and creating data  
38 dictionaries for quality improvement and research in chronic disease using routinely collected  
39 data: an ontology-driven approach. *Informatics in primary care.* 2011;19(3):127-34.
- 40 56. World Health Organisation. International Statistical Classification of Diseases and  
41 Related Health Problems 10th Revision 2016 2nd January 2020. Available from:  
42 <http://apps.who.int/classifications/icd10/browse/2016/en>.
- 43 57. John A, McGregor J, Fone D, Dunstan F, Cornish R, Lyons RA, et al. Case-finding for  
44 common mental disorders of anxiety and depression in primary care: an external validation of  
45 routinely collected data. *BMC Medical Informatics and Decision Making.* 2016;16(1):35.
- 46 58. Office for National Statistics. Ethnicity 2018 2nd January 2020. Available from:  
47 <https://www.ons.gov.uk/peoplepopulationandcommunity/culturalidentity/ethnicity>.
- 48 59. Tippu Z, Correa A, Liyanage H, Burleigh D, McGovern A, Van Vlymen J, et al. Ethnicity  
49 Recording in Primary Care Computerised Medical Record Systems: An Ontological Approach. *J*  
50 *Innov Health Inform.* 2017;23(4):920.
- 51 60. Ministry of Housing CLG. English indices of deprivation 2015: technical report 2015 2nd  
52 Jan 2020. Available from: [https://www.gov.uk/government/publications/english-indices-of-](https://www.gov.uk/government/publications/english-indices-of-deprivation-2015-technical-report)  
53 [deprivation-2015-technical-report](https://www.gov.uk/government/publications/english-indices-of-deprivation-2015-technical-report).



- 1  
2  
3  
4  
5  
6  
7  
8  
9  
10  
11  
12  
13  
14  
15  
16  
17  
18  
19  
20  
21  
22  
23  
24  
25  
26  
27  
28  
29  
30  
31  
32  
33  
34  
35  
36  
37  
38  
39  
40  
41  
42  
43  
44  
45  
46  
47  
48  
49  
50  
51  
52  
53  
54  
55  
56  
57  
58  
59  
60
61. Clark DM. Realizing the Mass Public Benefit of Evidence-Based Psychological Therapies: The IAPT Program. *Annu Rev Clin Psychol*. 2018;14:159-83.
  62. Dean AG, Sullivan KM, Soe MM. OpenEpi: Open Source Epidemiologic Statistics for Public Health, Version [updated 06/04/2013. Available from: [www.OpenEpi.com](http://www.OpenEpi.com).
  63. Kelsey JL, Whittemore AS, Evans AS, Thompson WD. *Methods in Observational Epidemiology* 2nd Edition, Table 12-15. New York: Oxford University Press; 1996.
  64. Kessler RC, Chiu WT, Demler O, Merikangas KR, Walters EE. Prevalence, severity, and comorbidity of 12-month DSM-IV disorders in the National Comorbidity Survey Replication. *Archives of general psychiatry*. 2005;62(6):617-27.
  65. Chu SY, Chen YJ, Tseng WC, Lin MW, Chen TJ, Hwang CY, et al. Comorbidity profiles among patients with alopecia areata: the importance of onset age, a nationwide population-based study. *Journal of the American Academy of Dermatology*. 2011;65(5):949-56.
  66. Ho D, Imai K, King G, Stuart E. MatchIt: Nonparametric Preprocessing for Parametric Causal Inference. *Journal of Statistical Software, Articles*. 2011;42(8):1 - 28.
  67. Schouten LJ, Straatman H, Kiemeny LA, Verbeek AL. Cancer incidence: life table risk versus cumulative risk. *J Epidemiol Community Health*. 1994;48(6):596-600.
  68. Kumar S, de Lusignan S, McGovern A, Correa A, Hriskova M, Gatenby P, et al. Ischaemic stroke, haemorrhage, and mortality in older patients with chronic kidney disease newly started on anticoagulation for atrial fibrillation: a population based study from UK primary care. *Bmj*. 2018;360:k342.
  69. Rayner LH, McGovern A, Sherlock J, Gatenby P, Correa A, Creagh-Brown B, et al. The impact of therapy on the risk of asthma in type 2 diabetes. *Clin Respir J*. 2019;13(5):299-305.

## Additional File 2

### The epidemiology, management, and the associated burden of mental health illness, atopic and autoimmune conditions, and common infections in alopecia areata: Protocol for an observational study series

Dr Matthew Harries, Dr Abby Macbeth, Dr Susan Holmes, Professor Andrew R Thompson, Dr Wing Sin Chui, Dr William Romero Gallardo, Professor Andrew G Messenger, Dr Christos Tziotzios, Professor Simon de Lusignan

## Codes used to define alopecia areata and related clinical conditions, dermatology referrals, and treatments for alopecia areata which may be issued in primary care

**Supplementary table S1.1.** Read codes to be used to identify cases of alopecia areata, non-specified alopecia and alternative diagnoses (exclusion diagnoses).

| <b>Alopecia Areata</b>       |                |                           |
|------------------------------|----------------|---------------------------|
| <b>Read V2 Code</b>          | <b>Term ID</b> | <b>Description</b>        |
| M2401                        | All            | Alopecia areata           |
| M240B                        | All            | Alopecia totalis          |
| M240K                        | All            | Alopecia universalis      |
| M240U                        | All            | Ophiasis                  |
| Myu62                        | All            | [X]Other alopecia areata  |
| <b>Read CTV3 Code</b>        | <b>Term ID</b> | <b>Description</b>        |
| XE1BH                        | All            | Alopecia areata           |
| M240D                        | All            | Ophiasic alopecia areata  |
| M240B                        | All            | Total alopecia areata     |
| X509h                        | All            | Alopecia universalis      |
| X590h                        | All            | Universal alopecia areata |
| Myu62                        | All            | [x]Other alopecia areata  |
| <b>Non-specific alopecia</b> |                |                           |
| <b>Read V2 Code</b>          | <b>Term ID</b> | <b>Description</b>        |
| M240.                        | All            | Alopecia                  |
| M2400                        | All            | Alopecia unspecified      |
| M2408                        | All            | Alopecia localis          |
| M2409                        | All            | Alopecia disseminata      |
| M240z                        | All            | Alopecia NOS              |
| 22D7.                        | All            | O/E - alopecia            |
| <b>Read CTV3 Code</b>        | <b>Term ID</b> | <b>Description</b>        |
| XE2Qa                        | All            | Alopecia                  |
| X75wD                        | All            | Partial loss of hair      |
| X509c                        | All            | Non-scarring alopecia     |
| M2409                        | All            | Diffuse alopecia          |
| X509e                        | All            | Circumscribed alopecia    |
| M2408                        | All            | Alopecia localis          |
| M240z                        | All            | Alopecia NOS              |
| XE1BG                        | All            | Alopecia unspecified      |
| XM1YG                        | All            | O/E - alopecia            |



|                          |                |                                          |
|--------------------------|----------------|------------------------------------------|
| XE1h9                    | All            | O/E - patches of alopecia                |
| <b>Scarring alopecia</b> |                |                                          |
| <b>Read V2 Code</b>      | <b>Term ID</b> | <b>Description</b>                       |
| M240Q                    | All            | Pseudopelade                             |
| M147.                    | All            | Erosive pustular dermatosis of the scalp |
| M24X.                    | All            | Cicatricial alopecia, unspecified        |
| M240R                    | All            | Lichen planopilaris                      |
| M240P                    | All            | Alopecia mucinosa                        |
| M2yF.                    | All            | Follicular mucinosis                     |
| M240S                    | All            | Folliculitis decalvans                   |
| M240T                    | All            | Folliculitis ulerythematosa reticulata   |
| X7055                    | All            | Linear morphoea                          |
| M2440                    | All            | Dissecting cellulitis of scalp           |
| M261K                    | All            | Acne keloidalis                          |
| M261J                    | All            | Acne necrotica                           |
| M2448                    | All            | Perifolliculitis capitis abscedens       |
| M2447                    | All            | Perifolliculitis of scalp                |
| <b>Read CTV3 Code</b>    | <b>Term ID</b> | <b>Description</b>                       |
| X509i                    | All            | Scarring alopecia                        |
| X509i                    | All            | Cicatricial alopecia                     |
| X50Eo                    | All            | Lipoedematous alopecia                   |
| X509j                    | All            | Alopecia parvimaculata                   |
| X509k                    | All            | Pseudopelade                             |
| X509l                    | All            | Tufted folliculitis                      |
| X509m                    | All            | Erosive pustular dermatosis of the scalp |
| X509n                    | All            | Traumatic alopecia                       |
| M240C                    | All            | Alopecia follicularis                    |
| Myu65                    | All            | [X]Other cicatricial alopecia            |
| Myu6E                    | All            | [X]Cicatricial alopecia, unspecified     |
| X507b                    | All            | Lichen planopilaris                      |
| X507i                    | All            | Lichen planopilaris of scalp             |
| X50Ff                    | All            | Alopecia mucinosa                        |
| XaQbR                    | All            | Follicular mucinosis                     |
| X500w                    | All            | Folliculitis decalvans                   |
| X5076                    | All            | Keratosis pilaris decalvans              |
| M21y5                    | All            | Folliculitis ulerythematosa reticulata   |
| X500x                    | All            | Folliculitis keloidalis                  |
| M2104                    | All            | Linear scleroderma                       |
| M2440                    | All            | Folliculitis abscedens et suffodiens     |
| X50Es                    | All            | Acne necrotica                           |
| X50Eq                    | All            | Keloidalis nuchae                        |
| M2440                    | All            | Dissecting cellulitis of scalp           |
| M2448                    | All            | Perifolliculitis capitis abscedens       |

|                                       |                |                                                               |
|---------------------------------------|----------------|---------------------------------------------------------------|
| M2447                                 | All            | Perifolliculitis of scalp                                     |
| <b>Congenital alopecia</b>            |                |                                                               |
| <b>Read V2 Code</b>                   | <b>Term ID</b> | <b>Description</b>                                            |
| PH40.                                 | All            | Congenital alopecia                                           |
| PH400                                 | All            | Congenital alopecia, unspecified                              |
| PH401                                 | All            | Congenital localised alopecia                                 |
| PH402                                 | All            | Congenital generalised alopecia                               |
| PH40z                                 | All            | Congenital alopecia NOS                                       |
| <b>Read CTV3 Code</b>                 | <b>Term ID</b> | <b>Description</b>                                            |
| XE1MR                                 | All            | Congenital alopecia                                           |
| X78De                                 | All            | Total congenital alopecia                                     |
| X78Df                                 | All            | Congenital alopecia with keratin cysts                        |
| PH401                                 | All            | Congenital localised alopecia                                 |
| PH40z                                 | All            | Congenital alopecia NOS                                       |
| XE1MS                                 | All            | Congenital generalised alopecia                               |
| PH400                                 | All            | Congenital alopecia, unspecified                              |
| <b>Traction or traumatic alopecia</b> |                |                                                               |
| <b>Read V2 Code</b>                   | <b>Term ID</b> | <b>Description</b>                                            |
| M240V                                 | All            | Traction alopecia                                             |
| <b>Read CTV3 Code</b>                 | <b>Term ID</b> | <b>Description</b>                                            |
| Ua1AS                                 | All            | Traction alopecia                                             |
| X509n                                 | All            | Traumatic alopecia                                            |
| X503h                                 | All            | Friction alopecia                                             |
| <b>Androgenetic alopecia</b>          |                |                                                               |
| <b>Read V2 Code</b>                   | <b>Term ID</b> | <b>Description</b>                                            |
| M2402                                 | All            | Male pattern alopecia                                         |
| M2403                                 | All            | Frontal alopecia of women                                     |
| 7G140                                 | All            | Hair bearing skin flap to scalp for male pattern baldness     |
| 7G1E.                                 | All            | Hair bearing graft of skin to scalp for male pattern baldness |
| 7G1E0                                 | All            | Hair bearing punch graft to scalp for male pattern baldness   |
| 7G1E1                                 | All            | Hair bearing strip graft to scalp for male pattern baldness   |
| 7G1E2                                 | All            | Hair bearing graft to scalp for male pattern baldness NEC     |
| <b>Read CTV3 Code</b>                 | <b>Term ID</b> | <b>Description</b>                                            |
| M2402                                 | Y50P7          | Androgenetic alopecia                                         |
| M2402                                 | Y50P8          | Male pattern alopecia                                         |
| M2402                                 | Y57P9          | Male pattern baldness                                         |
| M2402                                 | Y57PA          | Pattern baldness                                              |
| M2403                                 | All            | Frontal alopecia of women                                     |
| X509f                                 | All            | Involutional alopecia                                         |
| 7G140                                 | All            | Hair bearing skin flap to scalp for male pattern baldness     |

|                           |                |                                                               |
|---------------------------|----------------|---------------------------------------------------------------|
| 7G1E0                     | All            | Hair bearing punch graft to scalp for male pattern baldness   |
| XM1JM                     | All            | Hair bearing graft of skin to scalp for male pattern baldness |
| 7G1E2                     | All            | Hair bearing graft to scalp for male pattern baldness NEC     |
| 7G1E1                     | All            | Hair bearing strip graft to scalp for male pattern baldness   |
| <b>Telogen effluvium</b>  |                |                                                               |
| <b>Read V2 Code</b>       | <b>Term ID</b> | <b>Description</b>                                            |
| M240M                     | All            | Telogen effluvium                                             |
| <b>Read CTV3 Code</b>     | <b>Term ID</b> | <b>Description</b>                                            |
| X509q                     | All            | Telogen effluvium                                             |
| <b>Anagen effluvium</b>   |                |                                                               |
| <b>Read V2 Code</b>       | <b>Term ID</b> | <b>Description</b>                                            |
| M240N                     | All            | Anagen effluvium                                              |
| <b>Read CTV3 Code</b>     | <b>Term ID</b> | <b>Description</b>                                            |
| M240N                     | All            | Anagen effluvium                                              |
| <b>Tinea capitis</b>      |                |                                                               |
| <b>Read V2 Code</b>       | <b>Term ID</b> | <b>Description</b>                                            |
| AB00.                     | 00             | Dermatophytosis of scalp or beard                             |
| AB00.                     | 11             | Kerion                                                        |
| AB000                     | 00             | Dermatophytosis of scalp                                      |
| AB000                     | 11             | Tinea Capitis                                                 |
| AB00z                     | 00             | Dermatophytosis of scalp or beard NOS                         |
| <b>Read CTV3 Code</b>     | <b>Term ID</b> | <b>Description</b>                                            |
| AB000                     | All            | Tinea capitis                                                 |
| AB000                     | Y71oW          | Scalp ringworm                                                |
| AB000                     | Y71oX          | Dermatophytosis of scalp                                      |
| AB000                     | Y71oY          | Tinea capitis                                                 |
| AB000                     | Y71oZ          | Black dot ringworm                                            |
| AB000                     | Y71od          | Tinea tonsurans                                               |
| AB000                     | Ya6oA          | Tinea of the scalp                                            |
| X70QN                     | All            | Favus                                                         |
| X70QN                     | Y71ob          | Favus                                                         |
| X70QN                     | Y71oc          | Tinea favosa                                                  |
| X70QM                     | All            | Suppurative ringworm                                          |
| XE0SA                     | All            | Dermatophytosis of scalp or beard                             |
| AB00z                     | All            | Dermatophytosis of scalp or beard NOS                         |
| <b>Secondary syphilis</b> |                |                                                               |
| <b>Read V2 Code</b>       | <b>Term ID</b> | <b>Description</b>                                            |
| A913.                     | All            | Secondary syphilis of skin or mucus membranes                 |
| A9133                     | All            | Secondary syphilis of skin                                    |
| A913z                     | All            | Secondary syphilis of skin or mucus membranes NOS             |

|                         |                |                                                   |
|-------------------------|----------------|---------------------------------------------------|
| A9181                   | All            | Syphilitic alopecia                               |
| <b>Read CTV3 Code</b>   | <b>Term ID</b> | <b>Description</b>                                |
| A913.                   | All            | Secondary syphilis of skin and mucous membrane    |
| A9133                   | All            | Secondary syphilis of skin                        |
| A913z                   | All            | Secondary syphilis of skin or mucus membranes NOS |
| A9181                   | All            | Syphilitic alopecia                               |
| <b>Trichotillomania</b> |                |                                                   |
| <b>Read V2 Code</b>     | <b>Term ID</b> | <b>Description</b>                                |
| Eu633                   | All            | [X]Trichotillomania                               |
| <b>Read CTV3 Code</b>   | <b>Term ID</b> | <b>Description</b>                                |
| Eu633                   | All            | Trichotillomania                                  |

**Supplementary table S1.2.** Read codes to identify the extent of alopecia. The extent of disease will be considered to be that of the category recorded with the greatest extent

| <b>Alopecia Areata (Category: Localised)</b>   |                |                           |
|------------------------------------------------|----------------|---------------------------|
| <b>Read V2 Code</b>                            | <b>Term ID</b> | <b>Description</b>        |
| M2401                                          | All            | Alopecia areata           |
| M240U                                          | All            | Ophiasis                  |
| Myu62                                          | All            | [X]Other alopecia areata  |
| <b>Read CTV3 Code</b>                          | <b>Term ID</b> | <b>Description</b>        |
| XE1BH                                          | All            | Alopecia areata           |
| M240D                                          | All            | Ophiasic alopecia areata  |
| Myu62                                          | All            | [x]Other alopecia areata  |
| <b>Alopecia Areata (Category: Totalis)</b>     |                |                           |
| <b>Read V2 Code</b>                            | <b>Term ID</b> | <b>Description</b>        |
| M240B                                          | All            | Alopecia totalis          |
| <b>Read CTV3 Code</b>                          | <b>Term ID</b> | <b>Description</b>        |
| M240B                                          | All            | Total alopecia areata     |
| <b>Alopecia Areata (Category: Universalis)</b> |                |                           |
| <b>Read V2 Code</b>                            | <b>Term ID</b> | <b>Description</b>        |
| M240K                                          | All            | Alopecia universalis      |
| <b>Read CTV3 Code</b>                          | <b>Term ID</b> | <b>Description</b>        |
| X509h                                          | All            | Alopecia universalis      |
| X590h                                          | All            | Universal alopecia areata |

**Supplementary table S1.3.** Read codes to identify dermatology referrals.

| <b>Dermatology referrals</b> |                |                                                               |
|------------------------------|----------------|---------------------------------------------------------------|
| <b>Read V2 Code</b>          | <b>Term ID</b> | <b>Description</b>                                            |
| 8HJD.                        | All            | Dermatology self-referral                                     |
| 8H43.                        | All            | Dermatological referral                                       |
| 8H4S.                        | All            | Referral to dermatology special interest general practitioner |
| 8HHX.                        | All            | Referral to dermatology nurse specialist                      |
| 8HVI.                        | All            | Private referral to dermatologist                             |
| 8Hkq.                        | All            | Referral to community dermatology service                     |
| 8Hm0.                        | All            | Referral to dermatology clinical assessment service           |
| 8HM3.                        | All            | Listed for Dermatology admisn                                 |
| 8H3I.                        | All            | Non-urgent dermatology admisn.                                |
| 8HIJ4                        | All            | Internal practice dermatology referral                        |
| 8TOD.                        | All            | Referral to paediatric dermatology service                    |
| <b>Read CTV3 Code</b>        | <b>Term ID</b> | <b>Description</b>                                            |
| 8H43.                        | All            | Dermatological referral                                       |
| XaZJ0                        | All            | Referral to teledermatology service                           |
| XaXsX                        | All            | Referral to community dermatology service                     |
| 8HJD.                        | All            | Dermatology self-referral                                     |
| XaBTS                        | All            | Referral to dermatologist                                     |
| 8HVI.                        | All            | Private referral to dermatologist                             |
| Xaaln                        | All            | Internal practice dermatology referral                        |
| XaKCB                        | All            | Referral to dermatology nurse specialist                      |
| XaXsX                        | All            | Referral to community dermatology service                     |
| Xaacp                        | All            | Referral to paediatric dermatology service                    |
| XaAeq                        | All            | Referral for dermatology domiciliary visit                    |
| XaLqL                        | All            | Referral to dermatology special interest general practitioner |
| XaQKh                        | All            | Referral to dermatology clinical assessment service           |
| 8HK3.                        | All            | Dermatology D.V. requested                                    |
| XaAeq                        | All            | Referral for dermatology DV                                   |

**Supplementary table S1.4.** Medications which may be issued in primary care for the treatment of alopecia areata.

\* topical steroids will be grouped by potency; mild, moderate, potent, and very potent.

| Medication group  | Examples                                                                                                         |
|-------------------|------------------------------------------------------------------------------------------------------------------|
| Topical steroids* | Hydrocortisone, Bethamethasone, Fluocinolone acetonide, Clobetasol proprionate, Clobetasone butyrate, Mometasone |
| Minoxidil         | Minoxidil                                                                                                        |
| Systemic steroids | Prednisolone                                                                                                     |
| Dithranol         | Dithranol                                                                                                        |

## Codes used to identify mental health conditions and treatments

**Supplementary table S2.1.** Algorithms used to identify anxiety (non-phobia related anxiety disorder), depression episodes, recurrent major depression, agoraphobia, adjustment disorder self-harm and parasuicide.

Expressions in capitals equate to Boolean expressions. \*More than 1 year ago. SSRIs = selective serotonin reuptake inhibitors, TCA = tricyclic antidepressants, MAOI = monoamine oxidase inhibitors, CBT = cognitive behavioural therapy.

| Clinical entity               | ICD 10 code | Definition                                                                                                                                                                 |
|-------------------------------|-------------|----------------------------------------------------------------------------------------------------------------------------------------------------------------------------|
| Depressive episodes           | F32         | Any coded depressive episode (Supplementary table S2.2) AND concurrent treatment for depression                                                                            |
| Recurrent depressive disorder | F33         | (Any historical code* for a depressive episode [table S2.2] AND current treatment for depression) OR Any code for recurrent depressive disorder (Supplementary table S2.3) |
| Anxiety disorder              | F41         | Any coded anxiety episode (Supplementary table S2.4) AND concurrent treatment for anxiety                                                                                  |
| Adjustment disorder           | F43.2       | Any diagnosis code for adjustment disorder (Supplementary table S2.5)                                                                                                      |
| Agoraphobia                   | F40.0       | Any diagnosis code for agoraphobia (Supplementary table S2.6)                                                                                                              |
| Self-harm                     | NA          | Any diagnosis code or other strongly indicative code for self-harm (Supplementary table S2.7)                                                                              |
| Parasuicide                   | NA          | Any diagnosis code or other strongly indicative code for parasuicide including overdose (Supplementary tables S2.8 and S2.9)                                               |
| Depression treatments         | NA          | SSRIs, TCAs, MAOIs, counselling, CBT, and psychotherapy (Supplementary table S2.10)                                                                                        |
| Anxiety treatments            | NA          | SSRIs, anxiolytics, counselling, CBT, and psychotherapy (Supplementary table S2.10)                                                                                        |



**Supplementary table S2.2.** Read codes used to identify depression episodes.

| <b>Depression episodes</b> |                |                                                                           |
|----------------------------|----------------|---------------------------------------------------------------------------|
| <b>Read V2 Code</b>        | <b>Term ID</b> | <b>Description</b>                                                        |
| E0013                      | All            | Presenile dementia with depression                                        |
| E0021                      | All            | Senile dementia with depression                                           |
| E112.                      | All            | Single major depressive episode                                           |
| E1120                      | All            | Single major depressive episode, unspecified                              |
| E1121                      | All            | Single major depressive episode, mild                                     |
| E1122                      | All            | Single major depressive episode, moderate                                 |
| E1123                      | All            | Single major depressive episode, severe, without mention of psychosis     |
| E1124                      | All            | Single major depressive episode, severe, with psychosis                   |
| E1125                      | All            | Single major depressive episode, in partial or unspecified remission      |
| E1126                      | All            | Single major depressive episode, in full remission                        |
| E112z                      | All            | Single major depressive episode NOS                                       |
| E113.                      | All            | Recurrent major depressive episode                                        |
| E1130                      | All            | Recurrent major depressive episodes, unspecified                          |
| E1131                      | All            | Recurrent major depressive episodes, mild                                 |
| E1132                      | All            | Recurrent major depressive episodes, moderate                             |
| E1133                      | All            | Recurrent major depressive episodes, severe, without mention of psychosis |
| E1134                      | All            | Recurrent major depressive episodes, severe, with psychosis               |
| E1137                      | All            | Recurrent depressive disorder                                             |
| E113z                      | All            | Recurrent major depressive episode NOS                                    |
| E118.                      | All            | Seasonal affective disorder                                               |
| E11y2                      | All            | Atypical depressive disorder                                              |
| E11z2                      | All            | Masked depression                                                         |
| E130.                      | All            | Reactive depressive psychosis                                             |
| E135.                      | All            | Agitated depression                                                       |
| E2003                      | All            | Anxiety with depression                                                   |
| E291.                      | All            | Prolonged depressive reaction                                             |
| E2B..                      | All            | Depressive disorder NEC                                                   |
| E2B1.                      | All            | Chronic depression                                                        |
| E2B0.                      | All            | Postviral depression                                                      |
| Eu204                      | All            | [X]Post-schizophrenic depression                                          |
| Eu251                      | All            | [X]Schizoaffective disorder, depressive type                              |
| Eu32.                      | All            | [X]Depressive episode                                                     |
| Eu320                      | All            | [X]Mild depressive episode                                                |
| Eu321                      | All            | [X]Moderate depressive episode                                            |
| Eu322                      | All            | [X]Severe depressive episode without psychotic symptoms                   |
| Eu323                      | All            | [X]Severe depressive episode with psychotic symptoms                      |
| Eu324                      | All            | [X]Mild depression                                                        |
| Eu325                      | All            | [X]Major depression, mild                                                 |
| Eu326                      | All            | [X]Major depression, moderately severe                                    |



|    |       |     |                                                                                     |
|----|-------|-----|-------------------------------------------------------------------------------------|
| 1  |       |     |                                                                                     |
| 2  |       |     |                                                                                     |
| 3  |       |     |                                                                                     |
| 4  | E1136 | All | Recurrent major depressive episodes, in full remission                              |
| 5  | E113z | All | Recurrent major depressive episode NOS                                              |
| 6  | X00SU | All | Masked depression                                                                   |
| 7  | E11y2 | All | Atypical depressive disorder                                                        |
| 8  |       |     |                                                                                     |
| 9  | X00S8 | All | Post-schizophrenic depression                                                       |
| 10 | XSEGJ | All | Major depressive disorder                                                           |
| 11 | XSKr7 | All | Cotard syndrome                                                                     |
| 12 | XSGol | All | Moderate major depression                                                           |
| 13 | XSGok | All | Mild major depression                                                               |
| 14 | XSGom | All | Severe major depression without psychotic features                                  |
| 15 | XSGon | All | Severe major depression with psychotic features                                     |
| 16 |       |     |                                                                                     |
| 17 | E1137 | All | Recurrent depressive disorder                                                       |
| 18 | E130. | All | Reactive depressive psychosis                                                       |
| 19 | E2B.. | All | Depressive disorder NEC                                                             |
| 20 | E2B0. | All | Postviral depression                                                                |
| 21 | E2B1. | All | Chronic depression                                                                  |
| 22 |       |     |                                                                                     |
| 23 | Eu320 | All | [X]Mild depressive episode                                                          |
| 24 | Eu321 | All | [X]Moderate depressive episode                                                      |
| 25 | Eu331 | All | [X]Recurrent depressive disorder, current episode moderate                          |
| 26 | XE1Y1 | All | Recurrent major depressive episodes                                                 |
| 27 | XE1ZY | All | [X]Severe depressive episode without psychotic symptoms                             |
| 28 | XE1ZZ | All | [X]Severe depressive episode with psychotic symptoms                                |
| 29 | XE1Za | All | [X]Other depressive episodes                                                        |
| 30 | XE1Zb | All | [X]Depressive episode, unspecified                                                  |
| 31 |       |     |                                                                                     |
| 32 | XE1Zd | All | [X]Recurrent depressive disorder, current episode severe without psychotic symptoms |
| 33 |       |     |                                                                                     |
| 34 | XE1Ze | All | [X]Recurrent depressive disorder, current episode severe with psychotic symptoms    |
| 35 | XE1Zf | All | [X]Recurrent depressive disorder, unspecified                                       |
| 36 |       |     |                                                                                     |
| 37 | XaB9J | All | Depression NOS                                                                      |
| 38 | XaCHr | All | [X] Single episode agitated depression without psychotic symptoms                   |
| 39 | XaCHs | All | [X] Single episode major depression without psychotic symptoms                      |
| 40 | XaCIs | All | Mild depression                                                                     |
| 41 | XaCIt | All | Moderate depression                                                                 |
| 42 | XaCIu | All | Severe depression                                                                   |
| 43 |       |     |                                                                                     |
| 44 | E0013 | All | Presenile dementia with depression                                                  |
| 45 | E0021 | All | Senile dementia with depression                                                     |
| 46 |       |     |                                                                                     |
| 47 |       |     |                                                                                     |
| 48 |       |     |                                                                                     |
| 49 |       |     |                                                                                     |
| 50 |       |     |                                                                                     |
| 51 |       |     |                                                                                     |
| 52 |       |     |                                                                                     |
| 53 |       |     |                                                                                     |
| 54 |       |     |                                                                                     |
| 55 |       |     |                                                                                     |
| 56 |       |     |                                                                                     |
| 57 |       |     |                                                                                     |
| 58 |       |     |                                                                                     |
| 59 |       |     |                                                                                     |
| 60 |       |     |                                                                                     |

**Supplementary table S2.3.** Read codes used to identify a diagnosis of recurrent major depression.

| <b>Recurrent major depression</b> |                |                                                                                        |
|-----------------------------------|----------------|----------------------------------------------------------------------------------------|
| <b>Read V2 Code</b>               | <b>Term ID</b> | <b>Description</b>                                                                     |
| E113.                             | All            | Recurrent major depressive episode                                                     |
| E1130                             | All            | Recurrent major depressive episodes, unspecified                                       |
| E1131                             | All            | Recurrent major depressive episodes, mild                                              |
| E1132                             | All            | Recurrent major depressive episodes, moderate                                          |
| E1133                             | All            | Recurrent major depressive episodes, severe, without mention of psychosis              |
| E1134                             | All            | Recurrent major depressive episodes, severe, with psychosis                            |
| E1135                             | All            | Recurrent major depressive episodes, in partial or unspecified remission               |
| E1136                             | All            | Recurrent major depressive episodes, in full remission                                 |
| E1137                             | All            | Recurrent depressive disorder                                                          |
| E113z                             | All            | Recurrent major depressive episode NOS                                                 |
| E2B1.                             | All            | Chronic depression                                                                     |
| Eu32A                             | All            | [X]Recurrent major depressive episodes, severe, with psychosis, psychosis in remission |
| Eu33.                             | All            | [X]Recurrent depressive disorder                                                       |
| Eu330                             | All            | [X]Recurrent depressive disorder, current episode mild                                 |
| Eu331                             | All            | [X]Recurrent depressive disorder, current episode moderate                             |
| Eu332                             | All            | [X]Recurrent depressive disorder, current episode severe without psychotic symptoms    |
| Eu333                             | All            | [X]Recurrent depressive disorder, current episode severe with psychotic symptoms       |
| Eu334                             | All            | [X]Recurrent depressive disorder, currently in remission                               |
| Eu33y                             | All            | [X]Other recurrent depressive disorders                                                |
| Eu33z                             | All            | [X]Recurrent depressive disorder, unspecified                                          |
| <b>Read CTV3 Code</b>             | <b>Term ID</b> | <b>Description</b>                                                                     |
| Xa0wV                             | All            | Recurrent brief depressive disorder                                                    |
| XM1GC                             | All            | Endogenous depression - recurrent                                                      |
| E1130                             | All            | Recurrent major depressive episodes, unspecified                                       |
| E1131                             | All            | Recurrent major depressive episodes, mild                                              |
| E1132                             | All            | Recurrent major depressive episodes, moderate                                          |
| E1133                             | All            | Recurrent major depressive episodes, severe, without mention of psychosis              |
| E1134                             | All            | Recurrent major depressive episodes, severe, with psychosis                            |
| XaX54                             | All            | Recurrent major depressive episodes, severe, with psychosis, psychosis in remission    |
| E1135                             | All            | Recurrent major depressive episodes, in partial or unspecified remission               |
| E1136                             | All            | Recurrent major depressive episodes, in full remission                                 |
| E113z                             | All            | Recurrent major depressive episode NOS                                                 |
| E1137                             | All            | Recurrent depressive disorder                                                          |

|       |     |                                                                                     |
|-------|-----|-------------------------------------------------------------------------------------|
| E2B1. | All | Chronic depression                                                                  |
| Eu331 | All | [X]Recurrent depressive disorder, current episode moderate                          |
| XE1Y1 | All | Recurrent major depressive episodes                                                 |
| XE1Zd | All | [X]Recurrent depressive disorder, current episode severe without psychotic symptoms |
| XE1Ze | All | [X]Recurrent depressive disorder, current episode severe with psychotic symptoms    |
| XE1Zf | All | [X]Recurrent depressive disorder, unspecified                                       |

For peer review only

**Supplementary table S2.4.** Read codes used to identify anxiety episodes.

| <b>Anxiety episode</b> |                |                                                 |
|------------------------|----------------|-------------------------------------------------|
| <b>Read V2 Code</b>    | <b>Term ID</b> | <b>Description</b>                              |
| E200.                  | All            | Anxiety states                                  |
| E2000                  | All            | Anxiety state unspecified                       |
| E2001                  | All            | Panic disorder                                  |
| E2002                  | All            | Generalised anxiety disorder                    |
| E2003                  | All            | Anxiety with depression                         |
| E2004                  | All            | Chronic anxiety                                 |
| E2005                  | All            | Recurrent anxiety                               |
| E200z                  | All            | Anxiety state NOS                               |
| Eu41.                  | All            | [X]Other anxiety disorders                      |
| Eu410                  | All            | [X]Panic disorder [episodic paroxysmal anxiety] |
| Eu411                  | All            | [X]Generalized anxiety disorder                 |
| Eu412                  | All            | [X]Mixed anxiety and depressive disorder        |
| Eu413                  | All            | [X]Other mixed anxiety disorders                |
| Eu41y                  | All            | [X]Other specified anxiety disorders            |
| Eu41z                  | All            | [X]Anxiety disorder, unspecified                |
| <b>Read CTV3 Code</b>  | <b>Term ID</b> | <b>Description</b>                              |
| E200.                  | All            | Anxiety disorder                                |
| XE1Y7                  | All            | Panic disorder                                  |
| Eu410                  | All            | [X]Panic disorder [episodic paroxysmal anxiety] |
| E2002                  | All            | Generalised anxiety disorder                    |
| X00Sb                  | All            | Mixed anxiety and depressive disorder           |
| X00RP                  | All            | Organic anxiety disorder                        |
| E2004                  | All            | Chronic anxiety                                 |
| E2005                  | All            | Recurrent anxiety                               |
| E200z                  | All            | Anxiety state NOS                               |
| X00Sc                  | All            | Anxiety hysteria                                |
| Eu41.                  | All            | [X]Other anxiety disorders                      |
| Eu413                  | All            | [X]Other mixed anxiety disorders                |
| Eu41z                  | All            | [X]Anxiety disorder, unspecified                |
| XE1Zj                  | All            | [X]Other specified anxiety disorders            |

**Supplementary table S2.5.** Read codes used to identify adjustment disorder.

| <b>Adjustment disorder</b> |                |                                                                    |
|----------------------------|----------------|--------------------------------------------------------------------|
| <b>Read V2 Code</b>        | <b>Term ID</b> | <b>Description</b>                                                 |
| E29..                      | All            | Adjustment reaction                                                |
| E290.                      | All            | Brief depressive reaction                                          |
| E2900                      | All            | Grief reaction                                                     |
| E290z                      | All            | Brief depressive reaction NOS                                      |
| E291.                      | All            | Prolonged depressive reaction                                      |
| E292.                      | All            | Adjustment reaction with predominant disturbance of other emotions |
| E2924                      | All            | Adjustment reaction with anxious mood                              |
| E292y                      | All            | Adjustment reaction with mixed disturbance of emotion              |
| E292z                      | All            | Adjustment reaction with disturbance of other emotion NOS          |
| E293.                      | All            | Adjustment reaction with predominant disturbance of conduct        |
| E2930                      | All            | Adjustment reaction with aggression                                |
| E2931                      | All            | Adjustment reaction with antisocial behaviour                      |
| E2932                      | All            | Adjustment reaction with destructiveness                           |
| E293z                      | All            | Adjustment reaction with predominant disturbance of conduct NOS    |
| E294.                      | All            | Adjustment reaction with mixed disturbance of emotion and conduct  |
| E29y.                      | All            | Other adjustment reactions                                         |
| E29y2                      | All            | Adjustment reaction with physical symptoms                         |
| E29y3                      | All            | Elective mutism due to an adjustment reaction                      |
| E29y5                      | All            | Other adjustment reaction with withdrawal                          |
| E29yz                      | All            | Other adjustment reactions NOS                                     |
| E29z.                      | All            | Adjustment reaction NOS                                            |
| <b>Read CTV3 Code</b>      | <b>Term ID</b> | <b>Description</b>                                                 |
| E29..                      | All            | Adjustment disorder                                                |
| E290.                      | All            | Brief depressive adjustment reaction                               |
| E290z                      | All            | Brief depressive reaction NOS                                      |
| E291.                      | All            | Prolonged depressive adjustment reaction                           |
| E2924                      | All            | Adjustment reaction with anxious mood                              |
| E292y                      | All            | Adjustment reaction with mixed disturbance of emotion              |
| E293.                      | All            | Adjustment reaction with predominant disturbance of conduct        |
| E2930                      | All            | Adjustment reaction with aggression                                |
| E2931                      | All            | Adjustment reaction with antisocial behaviour                      |
| E2932                      | All            | Adjustment reaction with destructiveness                           |
| E293z                      | All            | Adjustment reaction with predominant disturbance of conduct NOS    |
| E294.                      | All            | Adjustment reaction with mixed disturbance of emotion and conduct  |
| E292.                      | All            | Adjustment reaction with predominant disturbance of other emotions |
| E292z                      | All            | Adjustment reaction with disturbance of other emotion NOS          |
| E29y.                      | All            | Other adjustment reactions                                         |

|       |     |                                               |
|-------|-----|-----------------------------------------------|
| E29yz | All | Other adjustment reactions NOS                |
| E29y2 | All | Adjustment reaction with physical symptoms    |
| E29y3 | All | Elective mutism due to an adjustment reaction |
| E29y5 | All | Other adjustment reaction with withdrawal     |
| E29z. | All | Adjustment reaction NOS                       |

For peer review only



**Supplementary table S2.6.** Read codes used to identify agoraphobia.

| <b>Agoraphobia</b>    |                |                                                           |
|-----------------------|----------------|-----------------------------------------------------------|
| <b>Read V2 Code</b>   | <b>Term ID</b> | <b>Description</b>                                        |
| Eu400                 | All            | [X]Agoraphobia                                            |
| E2021                 | All            | Agoraphobia with panic attacks                            |
| Eu400                 | All            | [X]Panic disorder with agoraphobia                        |
| E2022                 | All            | Agoraphobia without mention of panic attacks              |
| Eu400                 | All            | [X]Agoraphobia without history of panic disorder          |
| E2029                 | All            | Fear of crowds                                            |
| <b>Read CTV3 Code</b> | <b>Term ID</b> | <b>Description</b>                                        |
| X00SV                 | All            | Agoraphobia                                               |
| E2021                 | All            | Agoraphobia with panic attacks                            |
| E2022                 | All            | Agoraphobia without mention of panic attacks              |
| XaK2c                 | All            | H/O: agoraphobia                                          |
| XaY00                 | All            | Mobility inventory for agoraphobia                        |
| XaYS1                 | All            | Mobility inventory for agoraphobia when alone score       |
| XaYS0                 | All            | Mobility inventory for agoraphobia when accompanied score |
| X00SV                 | All            | Phobia of going out                                       |

**Supplementary table S2.7.** Read codes used to identify self-harm.

| <b>Self-harm</b>    |                |                                                                                                                           |
|---------------------|----------------|---------------------------------------------------------------------------------------------------------------------------|
| <b>Read V2 Code</b> | <b>Term ID</b> | <b>Description</b>                                                                                                        |
| U2...               | All            | [X]Intentional self-harm                                                                                                  |
| U2E..               | All            | [X]Self mutilation                                                                                                        |
| U2y..               | All            | [X]Intentional self harm by other specified means                                                                         |
| U2y1.               | All            | [X]Intentional self harm by other specified means, occurrence in residential institution                                  |
| U2y2.               | All            | [X]Intentional self harm by other specified means, occurrence at school, other institution and public administrative area |
| U2y3.               | All            | [X]Intentional self harm by other specified means, occurrence at sports and athletics area                                |
| U2y4.               | All            | [X]Intentional self harm by other specified means, occurrence on street and highway                                       |
| U2y5.               | All            | [X]Intentional self harm by other specified means, occurrence at trade and service area                                   |
| U2y6.               | All            | [X]Intentional self harm by other specified means, occurrence at industrial and construction area                         |
| U2y7.               | All            | [X]Intentional self harm by other specified means, occurrence on farm                                                     |
| U2yy.               | All            | [X]Intentional self harm by other specified means, occurrence at other specified place                                    |
| U2yz.               | All            | [X]Intentional self harm by other specified means, occurrence at unspecified place                                        |
| U2z..               | All            | [X]Intentional self harm by unspecified means                                                                             |
| U2z..               | All            | [X]Intentional self harm by unspecified means                                                                             |
| U2z0.               | All            | [X]Intentional self harm by unspecified means, occurrence at home                                                         |
| U2z1.               | All            | [X]Intentional self harm by unspecified means, occurrence in residential institution                                      |
| U2z2.               | All            | [X]Intentional self harm by unspecified means, occurrence at school, other institution and public administrative area     |
| U2z3.               | All            | [X]Intentional self harm by unspecified means, occurrence at sports and athletics area                                    |
| U2z4.               | All            | [X]Intentional self harm by unspecified means, occurrence on street and highway                                           |
| U2z5.               | All            | [X]Intentional self harm by unspecified means, occurrence at trade and service area                                       |
| U2z6.               | All            | [X]Intentional self harm by unspecified means, occurrence at industrial and construction area                             |
| U2z7.               | All            | [X]Intentional self harm by unspecified means, occurrence on farm                                                         |
| U2zy.               | All            | [X]Intentional self harm by unspecified means, occurrence at other specified place                                        |
| U2zz.               | All            | [X]Intentional self harm by unspecified means, occurrence at unspecified place                                            |
| 146B.               | All            | H/O: deliberate self harm                                                                                                 |
| ZV1B2               | All            | [V]Personal history of self-harm                                                                                          |
| U720.               | All            | [X]Sequelae of intentional self-harm                                                                                      |
| TK601               | All            | Self inflicted lacerations to wrist                                                                                       |
| U26..               | All            | [X]Intentional self harm by explosive material                                                                            |

|       |     |                                                                                                                                        |
|-------|-----|----------------------------------------------------------------------------------------------------------------------------------------|
| U260. | All | [X]Intentional self harm by explosive material, occurrence at home                                                                     |
| U261. | All | [X]Intentional self harm by explosive material, occurrence in residential institution                                                  |
| U262. | All | [X]Intentional self harm by explosive material, occurrence at school, other institution and public administrative area                 |
| U263. | All | [X]Intentional self harm by explosive material, occurrence at sports and athletics area                                                |
| U264. | All | [X]Intentional self harm by explosive material, occurrence on street and highway                                                       |
| U265. | All | [X]Intentional self harm by explosive material, occurrence at trade and service area                                                   |
| U266. | All | [X]Intentional self harm by explosive material, occurrence at industrial and construction area                                         |
| U267. | All | [X]Intentional self harm by explosive material, occurrence on farm                                                                     |
| U26y. | All | [X]Intentional self harm by explosive material, occurrence at other specified place                                                    |
| U26z. | All | [X]Intentional self harm by explosive material, occurrence at unspecified place                                                        |
| U27.. | All | [X]Intentional self harm by smoke, fire and flames                                                                                     |
| U270. | All | [X]Intentional self harm by smoke, fire and flames, occurrence at home                                                                 |
| U271. | All | [X]Intentional self harm by smoke, fire and flames, occurrence in residential institution                                              |
| U272. | All | [X]Intentional self harm by smoke, fire and flames, occurrence at school, other institution and public administrative area             |
| U273. | All | [X]Intentional self harm by smoke, fire and flames, occurrence at sports and athletics area                                            |
| U274. | All | [X]Intentional self harm by smoke, fire and flames, occurrence on street and highway                                                   |
| U275. | All | [X]Intentional self harm by smoke, fire and flames, occurrence at trade and service area                                               |
| U276. | All | [X]Intentional self harm by smoke, fire and flames, occurrence at industrial and construction area                                     |
| U277. | All | [X]Intentional self harm by smoke, fire and flames, occurrence on farm                                                                 |
| U27y. | All | [X]Intentional self harm by smoke, fire and flames, occurrence at other specified place                                                |
| U27z. | All | [X]Intentional self harm by smoke, fire and flames, occurrence at unspecified place                                                    |
| U28.. | All | [X]Intentional self harm by steam, hot vapours and hot objects                                                                         |
| U280. | All | [X]Intentional self harm by steam, hot vapours and hot objects, occurrence at home                                                     |
| U281. | All | [X]Intentional self harm by steam, hot vapours and hot objects, occurrence in residential institution                                  |
| U282. | All | [X]Intentional self harm by steam, hot vapours and hot objects, occurrence at school, other institution and public administrative area |
| U283. | All | [X]Intentional self harm by steam, hot vapours and hot objects, occurrence at sports and athletics area                                |
| U284. | All | [X]Intentional self harm by steam, hot vapours and hot objects, occurrence on street and highway                                       |

|                       |                |                                                                                                                  |
|-----------------------|----------------|------------------------------------------------------------------------------------------------------------------|
| U285.                 | All            | [X]Intentional self harm by steam, hot vapours and hot objects, occurrence at trade and service area             |
| U286.                 | All            | [X]Intentional self harm by steam, hot vapours and hot objects, occurrence at industrial and construction area   |
| U287.                 | All            | [X]Intentional self harm by steam, hot vapours and hot objects, occurrence on farm                               |
| U28y.                 | All            | [X]Intentional self harm by steam, hot vapours and hot objects, occurrence at other specified place              |
| U28z.                 | All            | [X]Intentional self harm by steam, hot vapours and hot objects, occurrence at unspecified place                  |
| U29..                 | All            | [X]Intentional self harm by sharp object                                                                         |
| U290.                 | All            | [X]Intentional self harm by sharp object, occurrence at home                                                     |
| U291.                 | All            | [X]Intentional self harm by sharp object, occurrence in residential institution                                  |
| U292.                 | All            | [X]Intentional self harm by sharp object, occurrence at school, other institution and public administrative area |
| U293.                 | All            | [X]Intentional self harm by sharp object, occurrence at sports and athletics area                                |
| U294.                 | All            | [X]Intentional self harm by sharp object, occurrence on street and highway                                       |
| U295.                 | All            | [X]Intentional self harm by sharp object, occurrence at trade and service area                                   |
| U296.                 | All            | [X]Intentional self harm by sharp object, occurrence at industrial and construction area                         |
| U297.                 | All            | [X]Intentional self harm by sharp object, occurrence on farm                                                     |
| U2A..                 | All            | [X]Intentional self harm by blunt object                                                                         |
| U2A0.                 | All            | [X]Intentional self harm by blunt object, occurrence at home                                                     |
| U2A1.                 | All            | [X]Intentional self harm by blunt object, occurrence in residential institution                                  |
| U2A2.                 | All            | [X]Intentional self harm by blunt object, occurrence at school, other institution and public administrative area |
| U2A3.                 | All            | [X]Intentional self harm by blunt object, occurrence at sports and athletics area                                |
| U2A4.                 | All            | [X]Intentional self harm by blunt object, occurrence on street and highway                                       |
| U2A5.                 | All            | [X]Intentional self harm by blunt object, occurrence at trade and service area                                   |
| U2A6.                 | All            | [X]Intentional self harm by blunt object, occurrence at industrial and construction area                         |
| U2A7.                 | All            | [X]Intentional self harm by blunt object, occurrence on farm                                                     |
| U2Ay.                 | All            | [X]Intentional self harm by blunt object, occurrence at other specified place                                    |
| U2Az.                 | All            | [X]Intentional self harm by blunt object, occurrence at unspecified place                                        |
| <b>Read CTV3 Code</b> | <b>Term ID</b> | <b>Description</b>                                                                                               |
| XE22H                 | All            | Suicide and self harm                                                                                            |
| X71BH                 | All            | Self injury by cigarette burn                                                                                    |
| XE22K                 | All            | Self injury with external chemical burn                                                                          |
| Xa0EN                 | All            | Self inflicted injury                                                                                            |
| ZV1B2                 | All            | [V]Personal history of self-harm                                                                                 |

|       |     |                                                                                                                  |
|-------|-----|------------------------------------------------------------------------------------------------------------------|
| XaF9U | All | H/O: deliberate self harm                                                                                        |
| U2A.. | All | [X]Intentional self harm by blunt object                                                                         |
| U2A0. | All | [X]Intentional self harm by blunt object, occurrence at home                                                     |
| U2A1. | All | [X]Intentional self harm by blunt object, occurrence in residential institution                                  |
| U2A2. | All | [X]Intentional self harm by blunt object, occurrence at school, other institution and public administrative area |
| U2A3. | All | [X]Intentional self harm by blunt object, occurrence at sports and athletics area                                |
| U2A4. | All | [X]Intentional self harm by blunt object, occurrence on street and highway                                       |
| U2A5. | All | [X]Intentional self harm by blunt object, occurrence at trade and service area                                   |
| U2A6. | All | [X]Intentional self harm by blunt object, occurrence at industrial and construction area                         |
| U2A7. | All | [X]Intentional self harm by blunt object, occurrence on farm                                                     |
| U2Ay. | All | [X]Intentional self harm by blunt object, occurrence at other specified place                                    |
| U2Az. | All | [X]Intentional self harm by blunt object, occurrence at unspecified place                                        |
| U29.. | All | [X]Intentional self harm by sharp object                                                                         |
| U290. | All | [X]Intentional self harm by sharp object, occurrence at home                                                     |
| U291. | All | [X]Intentional self harm by sharp object, occurrence in residential institution                                  |
| U292. | All | [X]Intentional self harm by sharp object, occurrence at school, other institution and public administrative area |
| U293. | All | [X]Intentional self harm by sharp object, occurrence at sports and athletics area                                |
| U294. | All | [X]Intentional self harm by sharp object, occurrence on street and highway                                       |
| U295. | All | [X]Intentional self harm by sharp object, occurrence at trade and service area                                   |
| U296. | All | [X]Intentional self harm by sharp object, occurrence at industrial and construction area                         |
| U297. | All | [X]Intentional self harm by sharp object, occurrence on farm                                                     |
| U29y. | All | [X]Intentional self harm by sharp object, occurrence at other specified place                                    |
| U29z. | All | [X]Intentional self harm by sharp object, occurrence at unspecified place                                        |
| XE22i | All | [X]Intentional self harm by self mutilation                                                                      |
| X766K | All | Deliberate self-harm                                                                                             |
| X766U | All | Biting self                                                                                                      |
| X766R | All | Biting own hand                                                                                                  |
| Xa2zx | All | Biting own fingers                                                                                               |
| Xa2zy | All | Biting own toes                                                                                                  |
| Xa2o5 | All | Biting own arm                                                                                                   |
| Xa2p5 | All | Burning self                                                                                                     |
| X766V | All | Cutting self                                                                                                     |
| XaBA0 | All | Cutting own wrists                                                                                               |

|    |       |     |                                                                    |
|----|-------|-----|--------------------------------------------------------------------|
| 1  |       |     |                                                                    |
| 2  |       |     |                                                                    |
| 3  |       |     |                                                                    |
| 4  | Ua1A4 | All | Cutting own throat                                                 |
| 5  | Xa2pE | All | Damaging own wounds                                                |
| 6  | Xa2pF | All | Reopening scars                                                    |
| 7  | Xa2pH | All | Poking fingers into wound                                          |
| 8  |       |     |                                                                    |
| 9  | XaAxe | All | Inserting objects into wound                                       |
| 10 | Xa2ny | All | Gouging own body parts                                             |
| 11 | Xa2nz | All | Gouging own flesh                                                  |
| 12 |       |     |                                                                    |
| 13 | Xa2o0 | All | Gouging own eyes                                                   |
| 14 | Xa2o1 | All | Gouging own rectum                                                 |
| 15 | Xa30D | All | Gouging own vagina                                                 |
| 16 | E2731 | All | Head-banging                                                       |
| 17 |       |     |                                                                    |
| 18 | Xa2o2 | All | Banging own head against object                                    |
| 19 | Xa2o3 | All | Banging own head against own body parts                            |
| 20 | Xa2pI | All | Hitting self                                                       |
| 21 | Xa2pJ | All | Punching self                                                      |
| 22 | Xa2pK | All | Slapping self                                                      |
| 23 |       |     |                                                                    |
| 24 | X766S | All | Head-hitting                                                       |
| 25 | Xa2p3 | All | Inserting foreign bodies into own orifices                         |
| 26 |       |     |                                                                    |
| 27 | Ua14Q | All | Self-electrocution                                                 |
| 28 | Xa2pQ | All | Nipping self                                                       |
| 29 | Xa2pM | All | Picking own skin                                                   |
| 30 | Xa2pR | All | Pinching self                                                      |
| 31 | Xa2pN | All | Rubbing own skin                                                   |
| 32 |       |     |                                                                    |
| 33 | X766T | All | Scratches self                                                     |
| 34 | Xa303 | All | Self-scalding                                                      |
| 35 |       |     |                                                                    |
| 36 | Ua14N | All | Self-incineration                                                  |
| 37 | X766L | All | Self-mutilation                                                    |
| 38 | X766M | All | Self-mutilation of hands                                           |
| 39 |       |     |                                                                    |
| 40 | Xa2nl | All | Self-mutilation of genitalia                                       |
| 41 | X766N | All | Self-mutilation of penis                                           |
| 42 | X766O | All | Self-mutilation of eyes                                            |
| 43 | Xa2nm | All | Enucleation of own eyes                                            |
| 44 |       |     |                                                                    |
| 45 | X766P | All | Self-mutilation of ears                                            |
| 46 | Xa2no | All | Self-inducing a prolapse                                           |
| 47 | Xa2nq | All | Breaking own bones                                                 |
| 48 | Xa2nr | All | Pulling own teeth out                                              |
| 49 | Xa2nt | All | Eating own flesh                                                   |
| 50 | Xa2nv | All | Stripping own skin                                                 |
| 51 |       |     |                                                                    |
| 52 | U2E.. | All | [X]Self mutilation                                                 |
| 53 | X766W | All | Swallowing objects                                                 |
| 54 | Xa2p2 | All | Swallowing substances                                              |
| 55 | X766Q | All | Self-inflicted skin problems                                       |
| 56 |       |     |                                                                    |
| 57 | XE22c | All | [X]Intentional self-harm                                           |
| 58 | U26.. | All | [X]Intentional self harm by explosive material                     |
| 59 | U260. | All | [X]Intentional self harm by explosive material, occurrence at home |
| 60 |       |     |                                                                    |



|       |     |                                                                                                                                        |
|-------|-----|----------------------------------------------------------------------------------------------------------------------------------------|
| U261. | All | [X]Intentional self harm by explosive material, occurrence in residential institution                                                  |
| U262. | All | [X]Intentional self harm by explosive material, occurrence at school, other institution and public administrative area                 |
| U263. | All | [X]Intentional self harm by explosive material, occurrence at sports and athletics area                                                |
| U264. | All | [X]Intentional self harm by explosive material, occurrence on street and highway                                                       |
| U265. | All | [X]Intentional self harm by explosive material, occurrence at trade and service area                                                   |
| U266. | All | [X]Intentional self harm by explosive material, occurrence at industrial and construction area                                         |
| U267. | All | [X]Intentional self harm by explosive material, occurrence on farm                                                                     |
| U26y. | All | [X]Intentional self harm by explosive material, occurrence at other specified place                                                    |
| U26z. | All | [X]Intentional self harm by explosive material, occurrence at unspecified place                                                        |
| U27.. | All | [X]Intentional self harm by smoke, fire and flames                                                                                     |
| U270. | All | [X]Intentional self harm by smoke, fire and flames, occurrence at home                                                                 |
| U271. | All | [X]Intentional self harm by smoke, fire and flames, occurrence in residential institution                                              |
| U272. | All | [X]Intentional self harm by smoke, fire and flames, occurrence at school, other institution and public administrative area             |
| U273. | All | [X]Intentional self harm by smoke, fire and flames, occurrence at sports and athletics area                                            |
| U274. | All | [X]Intentional self harm by smoke, fire and flames, occurrence on street and highway                                                   |
| U275. | All | [X]Intentional self harm by smoke, fire and flames, occurrence at trade and service area                                               |
| U276. | All | [X]Intentional self harm by smoke, fire and flames, occurrence at industrial and construction area                                     |
| U277. | All | [X]Intentional self harm by smoke, fire and flames, occurrence on farm                                                                 |
| U27y. | All | [X]Intentional self harm by smoke, fire and flames, occurrence at other specified place                                                |
| U27z. | All | [X]Intentional self harm by smoke, fire and flames, occurrence at unspecified place                                                    |
| U28.. | All | [X]Intentional self harm by steam, hot vapours and hot objects                                                                         |
| U280. | All | [X]Intentional self harm by steam, hot vapours and hot objects, occurrence at home                                                     |
| U281. | All | [X]Intentional self harm by steam, hot vapours and hot objects, occurrence in residential institution                                  |
| U282. | All | [X]Intentional self harm by steam, hot vapours and hot objects, occurrence at school, other institution and public administrative area |
| U283. | All | [X]Intentional self harm by steam, hot vapours and hot objects, occurrence at sports and athletics area                                |
| U284. | All | [X]Intentional self harm by steam, hot vapours and hot objects, occurrence on street and highway                                       |
| U285. | All | [X]Intentional self harm by steam, hot vapours and hot objects, occurrence at trade and service area                                   |

|       |     |                                                                                                                  |
|-------|-----|------------------------------------------------------------------------------------------------------------------|
| U286. | All | [X]Intentional self harm by steam, hot vapours and hot objects, occurrence at industrial and construction area   |
| U287. | All | [X]Intentional self harm by steam, hot vapours and hot objects, occurrence on farm                               |
| U28y. | All | [X]Intentional self harm by steam, hot vapours and hot objects, occurrence at other specified place              |
| U28z. | All | [X]Intentional self harm by steam, hot vapours and hot objects, occurrence at unspecified place                  |
| U29.. | All | [X]Intentional self harm by sharp object                                                                         |
| U290. | All | [X]Intentional self harm by sharp object, occurrence at home                                                     |
| U291. | All | [X]Intentional self harm by sharp object, occurrence in residential institution                                  |
| U292. | All | [X]Intentional self harm by sharp object, occurrence at school, other institution and public administrative area |
| U293. | All | [X]Intentional self harm by sharp object, occurrence at sports and athletics area                                |
| U294. | All | [X]Intentional self harm by sharp object, occurrence on street and highway                                       |
| U295. | All | [X]Intentional self harm by sharp object, occurrence at trade and service area                                   |
| U296. | All | [X]Intentional self harm by sharp object, occurrence at industrial and construction area                         |
| U297. | All | [X]Intentional self harm by sharp object, occurrence on farm                                                     |
| U2A.. | All | [X]Intentional self harm by blunt object                                                                         |
| U2A0. | All | [X]Intentional self harm by blunt object, occurrence at home                                                     |
| U2A1. | All | [X]Intentional self harm by blunt object, occurrence in residential institution                                  |
| U2A2. | All | [X]Intentional self harm by blunt object, occurrence at school, other institution and public administrative area |
| U2A3. | All | [X]Intentional self harm by blunt object, occurrence at sports and athletics area                                |
| U2A4. | All | [X]Intentional self harm by blunt object, occurrence on street and highway                                       |
| U2A5. | All | [X]Intentional self harm by blunt object, occurrence at trade and service area                                   |
| U2A6. | All | [X]Intentional self harm by blunt object, occurrence at industrial and construction area                         |
| U2A7. | All | [X]Intentional self harm by blunt object, occurrence on farm                                                     |
| U2Ay. | All | [X]Intentional self harm by blunt object, occurrence at other specified place                                    |
| U2Az. | All | [X]Intentional self harm by blunt object, occurrence at unspecified place                                        |



**Supplementary table S2.8.** Read codes used to identify parasuicide.

| <b>Parasuicide</b>  |                |                                                                                  |
|---------------------|----------------|----------------------------------------------------------------------------------|
| <b>Read V2 Code</b> | <b>Term ID</b> | <b>Description</b>                                                               |
| U21..               | All            | [X]Intent self harm by hanging, strangulation/suffocation                        |
| U210.               | All            | [X]Int self harm by hanging, strangulation/suffocation occ home                  |
| U211.               | All            | [X]Intent self harm by hanging, strangulation/suffocation at res institut        |
| U212.               | All            | [X]Int self harm by hanging, strangulation/suffocation in school/pub admin area  |
| U213.               | All            | [X]Intent self harm by hanging, strangulation/suffocation in sport/athletic area |
| U214.               | All            | [X]Int self harm by hanging, strangulation/suffocation in street/highway         |
| U215.               | All            | [X]Intent self harm by hanging, strangulation/suffocation trade/service area     |
| U216.               | All            | [X]Int self harm by hanging, strangulation/suffocation indust/construct area     |
| U217.               | All            | [X]Int self harm by hanging, strangulation/suffocation occ farm                  |
| U21y.               | All            | [X]Int self harm by hanging, strangulation/suffocation other spec place          |
| U21z.               | All            | [X]Intent self harm by hanging, strangulation/suffocation unspecif place         |
| U22..               | All            | [X]Intent self harm by drowning and submersion                                   |
| U220.               | All            | [X]Int self harm by drowning and submersion occ home                             |
| U221.               | All            | [X]Intent self harm by drowning and submersion at res institut                   |
| U222.               | All            | [X]Int self harm by drowning and submersion in school/pub admin area             |
| U223.               | All            | [X]Intent self harm by drowning and submersion in sport/athletic area            |
| U224.               | All            | [X]Int self harm by drowning and submersion in street/highway                    |
| U225.               | All            | [X]Intent self harm by drowning and submersion trade/service area                |
| U226.               | All            | [X]Int self harm by drowning and submersion indust/construct area                |
| U227.               | All            | [X]Int self harm by drowning and submersion occ farm                             |
| U22y.               | All            | [X]Int self harm by drowning and submersion other spec place                     |
| U22z.               | All            | [X]Intent self harm by drowning and submersion unspecif place                    |
| U23..               | All            | [X]Intent self harm by handgun discharge                                         |
| U230.               | All            | [X]Int self harm by handgun discharge occ home                                   |
| U231.               | All            | [X]Intent self harm by handgun discharge at res institut                         |
| U232.               | All            | [X]Int self harm by handgun discharge in school/pub admin area                   |
| U233.               | All            | [X]Intent self harm by handgun discharge in sport/athletic area                  |
| U234.               | All            | [X]Int self harm by handgun discharge in street/highway                          |
| U235.               | All            | [X]Intent self harm by handgun discharge trade/service area                      |
| U236.               | All            | [X]Int self harm by handgun discharge indust/construct area                      |
| U237.               | All            | [X]Int self harm by handgun discharge occ farm                                   |
| U23y.               | All            | [X]Int self harm by handgun discharge other spec place                           |
| U23z.               | All            | [X]Intent self harm by handgun discharge unspecif place                          |

|       |     |                                                                                                                                                 |
|-------|-----|-------------------------------------------------------------------------------------------------------------------------------------------------|
| U24.. | All | [X]Intentional self harm by rifle, shotgun and larger firearm discharge                                                                         |
| U240. | All | [X]Intentional self harm by rifle, shotgun and larger firearm discharge, occurrence at home                                                     |
| U241. | All | [X]Intentional self harm by rifle, shotgun and larger firearm discharge, occurrence in residential institution                                  |
| U242. | All | [X]Intentional self harm by rifle, shotgun and larger firearm discharge, occurrence at school, other institution and public administrative area |
| U243. | All | [X]Intentional self harm by rifle, shotgun and larger firearm discharge, occurrence at sports and athletics area                                |
| U244. | All | [X]Intentional self harm by rifle, shotgun and larger firearm discharge, occurrence on street and highway                                       |
| U245. | All | [X]Intentional self harm by rifle, shotgun and larger firearm discharge, occurrence at trade and service area                                   |
| U246. | All | [X]Intentional self harm by rifle, shotgun and larger firearm discharge, occurrence at industrial and construction area                         |
| U247. | All | [X]Intentional self harm by rifle, shotgun and larger firearm discharge, occurrence on farm                                                     |
| U24y. | All | [X]Intentional self harm by rifle, shotgun and larger firearm discharge, occurrence at other specified place                                    |
| U24z. | All | [X]Intentional self harm by rifle, shotgun and larger firearm discharge, occurrence at unspecified place                                        |
| U25.. | All | [X]Intentional self harm by other and unspecified firearm discharge                                                                             |
| U250. | All | [X]Intentional self harm by other and unspecified firearm discharge, occurrence at home                                                         |
| U251. | All | [X]Intentional self harm by other and unspecified firearm discharge, occurrence in residential institution                                      |
| U252. | All | [X]Intentional self harm by other and unspecified firearm discharge, occurrence at school, other institution and public administrative area     |
| U253. | All | [X]Intentional self harm by other and unspecified firearm discharge, occurrence at sports and athletics area                                    |
| U254. | All | [X]Intentional self harm by other and unspecified firearm discharge, occurrence on street and highway                                           |
| U255. | All | [X]Intentional self harm by other and unspecified firearm discharge, occurrence at trade and service area                                       |
| U256. | All | [X]Intentional self harm by other and unspecified firearm discharge, occurrence at industrial and construction area                             |
| U257. | All | [X]Intentional self harm by other and unspecified firearm discharge, occurrence on farm                                                         |
| U25y. | All | [X]Intentional self harm by other and unspecified firearm discharge, occurrence at other specified place                                        |
| U25z. | All | [X]Intentional self harm by other and unspecified firearm discharge, occurrence at unspecified place                                            |
| 2...  | All | [X]Suicide                                                                                                                                      |
| TK... | All | Attempted suicide                                                                                                                               |
| TK0.. | All | Suicide and selfinflicted poisoning by solid and liquid substances                                                                              |
| TK00. | All | Suicide and selfinflicted poisoning by analgesics, antipyretics and anti-rheumatics                                                             |
| TK01. | All | Suicide + selfinflicted poisoning by barbiturates                                                                                               |
| TK010 | All | Suicide and self inflicted injury by Amylobarbitone                                                                                             |

|       |     |                                                                                                                                                       |
|-------|-----|-------------------------------------------------------------------------------------------------------------------------------------------------------|
| TK011 | All | Suicide and self inflicted injury by Barbitone                                                                                                        |
| TK012 | All | Suicide and self inflicted injury by Butabarbitalone                                                                                                  |
| TK013 | All | Suicide and self inflicted injury by Pentabarbitalone                                                                                                 |
| TK014 | All | Suicide and self inflicted injury by Phenobarbitalone                                                                                                 |
| TK015 | All | Suicide and self inflicted injury by Quinalbarbitalone                                                                                                |
| TK01z | All | Suicide and self inflicted injury by barbiturates                                                                                                     |
| TK02. | All | Suicide and selfinflicted poisoning by other sedatives and hypnotics                                                                                  |
| TK03. | All | Suicide and selfinflicted poisoning by tranquillisers and other psychotropic agents                                                                   |
| TK04. | All | Suicide and selfinflicted poisoning by other drugs and medicines                                                                                      |
| TK05. | All | Suicide + selfinflicted poisoning by drug or medicine NOS                                                                                             |
| TK06. | All | Suicide and selfinflicted poisoning by agricultural and horticultural chemical and pharmaceutical preparations other than plant foods and fertilizers |
| TK07. | All | Suicide and selfinflicted poisoning by corrosive and caustic substances                                                                               |
| TK08. | All | Suicide and selfinflicted poisoning by arsenic and its compounds                                                                                      |
| TK0z. | All | Suicide and selfinflicted poisoning by solid and liquid substances NOS                                                                                |
| TK1.. | All | Suicide + selfinflicted poisoning by gases in domestic use                                                                                            |
| TK10. | All | Suicide and selfinflicted poisoning by gas distributed by pipeline                                                                                    |
| TK11. | All | Suicide and selfinflicted poisoning by liquefied petroleum gas distributed in mobile containers                                                       |
| TK1y. | All | Suicide and selfinflicted poisoning by other utility gas                                                                                              |
| TK1z. | All | Suicide and selfinflicted poisoning by gases in domestic use NOS                                                                                      |
| TK2.. | All | Suicide and selfinflicted poisoning by other gases and vapours                                                                                        |
| TK20. | All | Suicide and selfinflicted poisoning by motor vehicle exhaust gas                                                                                      |
| TK21. | All | Suicide and selfinflicted poisoning by other carbon monoxide                                                                                          |
| TK2y. | All | Suicide and selfinflicted poisoning by other gases and vapours                                                                                        |
| TK2z. | All | Suicide + selfinflicted poisoning by gases and vapours NOS                                                                                            |
| TK3.. | All | Suicide and selfinflicted injury by hanging, strangulation and suffocation                                                                            |
| TK31. | All | Suicide and selfinflicted injury by suffocation by plastic bag                                                                                        |
| TK3y. | All | Suicide and selfinflicted injury by other means of hanging, strangulation and suffocation                                                             |
| TK3z. | All | Suicide and selfinflicted injury by hanging, strangulation and suffocation NOS                                                                        |
| TK4.. | All | Suicide and selfinflicted injury by drowning                                                                                                          |
| TK5.. | All | Suicide and selfinflicted injury by firearms and explosives                                                                                           |
| TK50. | All | Suicide and selfinflicted injury by handgun                                                                                                           |
| TK51. | All | Suicide and selfinflicted injury by shotgun                                                                                                           |
| TK52. | All | Suicide and selfinflicted injury by hunting rifle                                                                                                     |
| TK53. | All | Suicide and selfinflicted injury by military firearms                                                                                                 |
| TK54. | All | Suicide and selfinflicted injury by other firearm                                                                                                     |
| TK55. | All | Suicide and selfinflicted injury by explosives                                                                                                        |
| TK5z. | All | Suicide and selfinflicted injury by firearms and explosives NOS                                                                                       |
| TK6.. | All | Suicide and selfinflicted injury by cutting and stabbing instruments                                                                                  |

|                       |                |                                                                                           |
|-----------------------|----------------|-------------------------------------------------------------------------------------------|
| TK60.                 | All            | Suicide and selfinflicted injury by cutting                                               |
| TK61.                 | All            | Suicide and selfinflicted injury by stabbing                                              |
| TK6z.                 | All            | Suicide and selfinflicted injury by cutting and stabbing instruments NOS                  |
| TK7..                 | All            | Suicide and selfinflicted injury by jumping from high place                               |
| TK70.                 | All            | Suicide and selfinflicted injury by jumping from residential premises                     |
| TK71.                 | All            | Suicide and selfinflicted injury by jumping from other manmade structure                  |
| TK72.                 | All            | Suicide and selfinflicted injury by jumping from natural sites                            |
| TK72.                 | All            | Suicide and selfinflicted injury by jumping from natural sites                            |
| TK7z.                 | All            | Suicide and selfinflicted injury by jumping from high place NOS                           |
| TKx..                 | All            | Suicide and selfinflicted injury by other means                                           |
| TKx0.                 | All            | Suicide and selfinflicted injury by jumping or lying before moving object                 |
| TKx01                 | All            | Suicide and selfinflicted injury by lying before moving object                            |
| TKx0z                 | All            | Suicide and selfinflicted injury by jumping or lying before moving object NOS             |
| TKx1.                 | All            | Suicide and selfinflicted injury by burns or fire                                         |
| TKx2.                 | All            | Suicide and selfinflicted injury by scald                                                 |
| TKx3.                 | All            | Suicide and selfinflicted injury by extremes of cold                                      |
| TKx4.                 | All            | Suicide and selfinflicted injury by electrocution                                         |
| TKx5.                 | All            | Suicide and selfinflicted injury by crashing of motor vehicle                             |
| TKx6.                 | All            | Suicide and selfinflicted injury by crashing of aircraft                                  |
| TKx7.                 | All            | Suicide and selfinflicted injury by caustic substances, except poisoning                  |
| TKxy.                 | All            | Suicide and selfinflicted injury by other specified means                                 |
| TKxz.                 | All            | Suicide and selfinflicted injury by other means NOS                                       |
| TKz..                 | All            | Suicide and selfinflicted injury NOS                                                      |
| <b>Read CTV3 Code</b> | <b>Term ID</b> | <b>Description</b>                                                                        |
| Xa04L                 | All            | Parasuicide                                                                               |
| Xa3jI                 | All            | Attempted suicide NOS                                                                     |
| 146A.                 | All            | H/O: attempted suicide                                                                    |
| XM1Fs                 | All            | Self hanging, strangulation or suffocation                                                |
| TK3..                 | All            | Suicide and selfinflicted injury by hanging, strangulation and suffocation                |
| TK30.                 | All            | Suicide or attempted suicide by hanging                                                   |
| Xa3jC                 | All            | Attempted suicide - hanging                                                               |
| Xa3jL                 | All            | Suicide - hanging                                                                         |
| TK3y.                 | All            | Suicide and selfinflicted injury by other means of hanging, strangulation and suffocation |
| TK3z.                 | All            | Suicide and selfinflicted injury by hanging, strangulation and suffocation NOS            |
| XE22I                 | All            | Suicide and selfinflicted injury by suffocation by plastic bag                            |
| Xa3jD                 | All            | Attempted suicide - suffocation                                                           |
| Xa3jM                 | All            | Suicide - suffocation                                                                     |
| TK0..                 | All            | Suicide and selfinflicted poisoning by solid and liquid substances                        |

|       |     |                                                                               |
|-------|-----|-------------------------------------------------------------------------------|
| TK0z. | All | Suicide and selfinflicted poisoning by solid and liquid substances NOS        |
| TK4.. | All | Suicide and selfinflicted injury by drowning                                  |
| TK5.. | All | Suicide or selfinflicted injury by firearms and explosives                    |
| TK50. | All | Suicide or selfinflicted injury by handgun                                    |
| TK51. | All | Suicide or selfinflicted injury by shotgun                                    |
| TK52. | All | Suicide or selfinflicted injury by hunting rifle                              |
| TK53. | All | Suicide or selfinflicted injury by military firearm                           |
| TK54. | All | Suicide and selfinflicted injury by other firearm                             |
| TK55. | All | Suicide or selfinflicted injury by explosives                                 |
| TK5z. | All | Suicide and selfinflicted injury by firearms and explosives NOS               |
| Xa3jF | All | Attempted suicide - firearms                                                  |
| Xa3jO | All | Suicide - firearms                                                            |
| TK6.. | All | Suicide or selfinflicted injury by cutting and stabbing                       |
| TK60. | All | Suicide or selfinflicted injury by cutting                                    |
| TK61. | All | Suicide or selfinflicted injury by stabbing                                   |
| TK6z. | All | Suicide and selfinflicted injury by cutting and stabbing instruments NOS      |
| Xa3jG | All | Attempted suicide - cut/stab                                                  |
| Xa3jP | All | Suicide - cut/stab                                                            |
| TK7.. | All | Suicide or self injury by jumping from a height                               |
| TK70. | All | Suicide and selfinflicted injury by jumping from residential premises         |
| TK71. | All | Suicide and selfinflicted injury by jumping from other man-made structure     |
| TK72. | All | Suicide and selfinflicted injury by jumping from natural sites                |
| TK72. | All | Suicide and selfinflicted injury by jumping from natural sites                |
| TK7z. | All | Suicide and selfinflicted injury by jumping from high place NOS               |
| X71B6 | All | Suicide or self injury by jumping from high man-made structure                |
| X71B7 | All | Suicide or self injury by jumping from high building                          |
| X71B8 | All | Suicide or self injury by jumping from bridge                                 |
| X71B9 | All | Suicide or self injury by jumping from high natural feature                   |
| X71BA | All | Suicide or self injury by jumping off cliff                                   |
| Xa3jH | All | Attempted suicide - jumping from a high place                                 |
| Xa3jQ | All | Suicide - jumping from a high place                                           |
| TKx.. | All | Suicide and selfinflicted injury by other means                               |
| TKx0. | All | Suicide and selfinflicted injury by jumping or lying before moving object     |
| TKx00 | All | Suicide and selfinflicted injury by jumping before moving object              |
| TKx01 | All | Suicide and selfinflicted injury by lying before moving object                |
| TKx0z | All | Suicide and selfinflicted injury by jumping or lying before moving object NOS |
| TKxy. | All | Suicide and selfinflicted injury by other specified means                     |
| TKxz. | All | Suicide and selfinflicted injury by other means NOS                           |
| TKx1. | All | Suicide or self injury by burning or fire                                     |
| TKx2. | All | Suicide or self injury by scalding                                            |
| X71BF | All | Suicide or self injury by igniting petrol soaked clothing                     |

|       |     |                                                                                           |
|-------|-----|-------------------------------------------------------------------------------------------|
| X71BG | All | Suicide or self injury by arson                                                           |
| TKx3. | All | Suicide or self injury by exposure to cold                                                |
| TKx4. | All | Suicide or self injury by electric current                                                |
| TKx7. | All | Suicide and selfinflicted injury by caustic substances, excluding poisoning               |
| TKz.. | All | Suicide and selfinflicted injury NOS                                                      |
| Xa3jI | All | Attempted suicide NOS                                                                     |
| Xa3jR | All | Suicide NOS                                                                               |
| X71B3 | All | Self poisoning by gas                                                                     |
| TK1.. | All | Suicide and selfinflicted poisoning by gases in domestic use                              |
| TK21. | All | Suicide and selfinflicted poisoning by other carbon monoxide                              |
| TK2y. | All | Suicide and selfinflicted poisoning by other gases and vapours                            |
| TK2z. | All | Suicide and selfinflicted poisoning by gases and vapours NOS                              |
| X71B4 | All | Self poisoning by carbon monoxide                                                         |
| TK20. | All | Self poisoning by motor vehicle exhaust gas                                               |
| X71B5 | All | Self poisoning by coal gas                                                                |
| X71BB | All | Suicide or self injury associated with moving vehicles                                    |
| TKx5. | All | Suicide or selfinflicted injury by crashing motor vehicle                                 |
| TKx6. | All | Suicide or selfinflicted injury by crashing of aircraft                                   |
| X71BC | All | Suicide or self injury by placing self in path of moving vehicle                          |
| X71BD | All | Suicide or self injury by placing self in path of moving motor vehicle                    |
| X71BE | All | Suicide or self injury by placing self in path of moving railway vehicle                  |
| XE22J | All | Suicide or attempted suicide by drowning                                                  |
| Xa3jE | All | Attempted suicide - drowning                                                              |
| Xa3jN | All | Suicide - drowning                                                                        |
| XM1Fs | All | Self hanging, strangulation or suffocation                                                |
| TK3.. | All | Suicide and selfinflicted injury by hanging, strangulation and suffocation                |
| TK30. | All | Suicide or attempted suicide by hanging                                                   |
| Xa3jL | All | Suicide - hanging                                                                         |
| TK3y. | All | Suicide and selfinflicted injury by other means of hanging, strangulation and suffocation |
| TK3z. | All | Suicide and selfinflicted injury by hanging, strangulation and suffocation NOS            |
| XE22I | All | Suicide and selfinflicted injury by suffocation by plastic bag                            |
| Xa3jD | All | Attempted suicide - suffocation                                                           |
| Xa3jM | All | Suicide - suffocation                                                                     |
| TK50. | All | Suicide or selfinflicted injury by handgun                                                |
| Ua1AA | All | Hanging self                                                                              |
| Ua1AB | All | Drowning self                                                                             |
| Ua1A9 | All | Jumping from height                                                                       |
| Ua1A8 | All | Jumping from building                                                                     |
| Ua1A7 | All | Jumping from bridge                                                                       |
| Ua14U | All | Jumping from cliff                                                                        |
| Ua1AE | All | Self-asphyxiation                                                                         |



|       |     |                                                                                                                                                       |
|-------|-----|-------------------------------------------------------------------------------------------------------------------------------------------------------|
| Ua1AD | All | Self-strangulation                                                                                                                                    |
| Ua1AC | All | Self-suffocation                                                                                                                                      |
| Ua14S | All | Throwing self in front of vehicle                                                                                                                     |
| Ua14T | All | Throwing self in front of train                                                                                                                       |
| X71B0 | All | Self poisoning by non-drug solid or liquid agents                                                                                                     |
| TK07. | All | Self poisoning by corrosive or caustic substance                                                                                                      |
| TK08. | All | Self poisoning by arsenic or its compounds                                                                                                            |
| X71B2 | All | Self poisoning by plants or parts of plants                                                                                                           |
| XM1FX | All | Self poisoning by agricultural chemical                                                                                                               |
| TK06. | All | Suicide and selfinflicted poisoning by agricultural and horticultural chemical and pharmaceutical preparations other than plant foods and fertilizers |
| X71B1 | All | Self poisoning by paraquat                                                                                                                            |
| Ua14R | All | Shooting self                                                                                                                                         |
| Xa2pL | All | Stabbing self                                                                                                                                         |
| U21.. | All | [X]Intent self harm by hanging, strangulation/suffocation                                                                                             |
| U210. | All | [X]Int self harm by hanging, strangulation/suffocation occ home                                                                                       |
| U211. | All | [X]Intent self harm by hanging, strangulation/suffocation at res institut                                                                             |
| U212. | All | [X]Int self harm by hanging, strangulation/suffocation in school/pub admin area                                                                       |
| U213. | All | [X]Intent self harm by hanging, strangulation/suffocation in sport/athletic area                                                                      |
| U214. | All | [X]Int self harm by hanging, strangulation/suffocation in street/highway                                                                              |
| U215. | All | [X]Intent self harm by hanging, strangulation/suffocation trade/service area                                                                          |
| U216. | All | [X]Int self harm by hanging, strangulation/suffocation indust/construct area                                                                          |
| U217. | All | [X]Int self harm by hanging, strangulation/suffocation occ farm                                                                                       |
| U21y. | All | [X]Int self harm by hanging, strangulation/suffocation other spec place                                                                               |
| U21z. | All | [X]Intent self harm by hanging, strangulation/suffocation unspecif place                                                                              |
| U22.. | All | [X]Intent self harm by drowning and submersion                                                                                                        |
| U220. | All | [X]Int self harm by drowning and submersion occ home                                                                                                  |
| U221. | All | [X]Intent self harm by drowning and submersion at res institut                                                                                        |
| U222. | All | [X]Int self harm by drowning and submersion in school/pub admin area                                                                                  |
| U223. | All | [X]Intent self harm by drowning and submersion in sport/athletic area                                                                                 |
| U224. | All | [X]Int self harm by drowning and submersion in street/highway                                                                                         |
| U225. | All | [X]Intent self harm by drowning and submersion trade/service area                                                                                     |
| U226. | All | [X]Int self harm by drowning and submersion indust/construct area                                                                                     |
| U227. | All | [X]Int self harm by drowning and submersion occ farm                                                                                                  |
| U22y. | All | [X]Int self harm by drowning and submersion other spec place                                                                                          |
| U22z. | All | [X]Intent self harm by drowning and submersion unspecif place                                                                                         |
| U23.. | All | [X]Intent self harm by handgun discharge                                                                                                              |

|       |     |                                                                                                                                                 |
|-------|-----|-------------------------------------------------------------------------------------------------------------------------------------------------|
| U230. | All | [X]Int self harm by handgun discharge occ home                                                                                                  |
| U231. | All | [X]Intent self harm by handgun discharge at res institut                                                                                        |
| U232. | All | [X]Int self harm by handgun discharge in school/pub admin area                                                                                  |
| U233. | All | [X]Intent self harm by handgun discharge in sport/athletic area                                                                                 |
| U234. | All | [X]Int self harm by handgun discharge in street/highway                                                                                         |
| U235. | All | [X]Intent self harm by handgun discharge trade/service area                                                                                     |
| U236. | All | [X]Int self harm by handgun discharge indust/construct area                                                                                     |
| U237. | All | [X]Int self harm by handgun discharge occ farm                                                                                                  |
| U23y. | All | [X]Int self harm by handgun discharge other spec place                                                                                          |
| U23z. | All | [X]Intent self harm by handgun discharge unspecif place                                                                                         |
| U24.. | All | [X]Intentional self harm by rifle, shotgun and larger firearm discharge                                                                         |
| U240. | All | [X]Intentional self harm by rifle, shotgun and larger firearm discharge, occurrence at home                                                     |
| U241. | All | [X]Intentional self harm by rifle, shotgun and larger firearm discharge, occurrence in residential institution                                  |
| U242. | All | [X]Intentional self harm by rifle, shotgun and larger firearm discharge, occurrence at school, other institution and public administrative area |
| U243. | All | [X]Intentional self harm by rifle, shotgun and larger firearm discharge, occurrence at sports and athletics area                                |
| U244. | All | [X]Intentional self harm by rifle, shotgun and larger firearm discharge, occurrence on street and highway                                       |
| U245. | All | [X]Intentional self harm by rifle, shotgun and larger firearm discharge, occurrence at trade and service area                                   |
| U246. | All | [X]Intentional self harm by rifle, shotgun and larger firearm discharge, occurrence at industrial and construction area                         |
| U247. | All | [X]Intentional self harm by rifle, shotgun and larger firearm discharge, occurrence on farm                                                     |
| U24y. | All | [X]Intentional self harm by rifle, shotgun and larger firearm discharge, occurrence at other specified place                                    |
| U24z. | All | [X]Intentional self harm by rifle, shotgun and larger firearm discharge, occurrence at unspecified place                                        |
| U25.. | All | [X]Intentional self harm by other and unspecified firearm discharge                                                                             |
| U250. | All | [X]Intentional self harm by other and unspecified firearm discharge, occurrence at home                                                         |
| U251. | All | [X]Intentional self harm by other and unspecified firearm discharge, occurrence in residential institution                                      |
| U252. | All | [X]Intentional self harm by other and unspecified firearm discharge, occurrence at school, other institution and public administrative area     |
| U253. | All | [X]Intentional self harm by other and unspecified firearm discharge, occurrence at sports and athletics area                                    |
| U254. | All | [X]Intentional self harm by other and unspecified firearm discharge, occurrence on street and highway                                           |
| U255. | All | [X]Intentional self harm by other and unspecified firearm discharge, occurrence at trade and service area                                       |
| U256. | All | [X]Intentional self harm by other and unspecified firearm discharge, occurrence at industrial and construction area                             |
| U257. | All | [X]Intentional self harm by other and unspecified firearm discharge, occurrence on farm                                                         |



1  
2  
3  
4  
5  
6  
7  
8  
9  
10  
11  
12  
13  
14  
15  
16  
17  
18  
19  
20  
21  
22  
23  
24  
25  
26  
27  
28  
29  
30  
31  
32  
33  
34  
35  
36  
37  
38  
39  
40  
41  
42  
43  
44  
45  
46  
47  
48  
49  
50  
51  
52  
53  
54  
55  
56  
57  
58  
59  
60

|       |     |                                                                                                                                           |
|-------|-----|-------------------------------------------------------------------------------------------------------------------------------------------|
| U25y. | All | <input checked="" type="checkbox"/> Intentional self harm by other and unspecified firearm discharge, occurrence at other specified place |
| U25z. | All | <input checked="" type="checkbox"/> Intentional self harm by other and unspecified firearm discharge, occurrence at unspecified place     |

For peer review only

Supplementary table S2.9. Read codes used to identify overdose.

| Medication overdose |         |                                                                 |
|---------------------|---------|-----------------------------------------------------------------|
| Read V2 Code        | Term ID | Description                                                     |
| U20..               | All     | [X]Intentional self poisoning /exposure to noxious substance    |
| U200.               | All     | [X]Intent self poison/exposure to nonopioid analgesic           |
| U2000               | All     | [X]Int self poison/exposure to nonopioid analgesic at home      |
| U2001               | All     | [X]Intent self poison nonopioid analgesic at res institut       |
| U2002               | All     | [X]Int self poison nonopioid analgesic in school/pub admin area |
| U2003               | All     | [X]Intent self pois nonopioid analgesic in sport/athletic area  |
| U2004               | All     | [X]Int self pois to nonopioid analgesic in street/highway       |
| U2005               | All     | [X]Intent self pois to nonopioid analgesic trade/service area   |
| U2006               | All     | [X]Int self pois to nonopioid analgesic indust/construct area   |
| U2007               | All     | [X]Int self poison/exposure to nonopioid analgesic on farm      |
| U200y               | All     | [X]Int self poison nonopioid analgesic other spec place         |
| U200z               | All     | [X]Intent self poison to nonopioid analgesic unspecif place     |
| U201.               | All     | [X]Intent self poison/exposure to antiepileptic                 |
| U2010               | All     | [X]Int self poison/exposure to antiepileptic at home            |
| U2011               | All     | [X]Intent self poison antiepileptic at res institut             |
| U2012               | All     | [X]Int self poison antiepileptic in school/pub admin area       |
| U2013               | All     | [X]Intent self pois antiepileptic in sport/athletic area        |
| U2014               | All     | [X]Int self pois antiepileptic in street/highway                |
| U2015               | All     | [X]Intent self pois antiepileptic trade/service area            |
| U2016               | All     | [X]Int self poison antiepileptic indust/construct area          |
| U2017               | All     | [X]Int self poison/exposure to antiepileptic on farm            |
| U201y               | All     | [X]Int self poison antiepileptic other spec place               |
| U201z               | All     | [X]Intent self poison antiepileptic unspecif place              |
| U202.               | All     | [X]Intent self poison/exposure to sedative hypnotic             |
| U2020               | All     | [X]Int self poison/exposure to sedative hypnotic at home        |
| U2021               | All     | [X]Intent self poison sedative hypnotic at res institut         |
| U2022               | All     | [X]Int self poison sedative hypnotic in school/pub admin area   |
| U2023               | All     | [X]Intent self pois sedative hypnotic in sport/athletic area    |
| U2024               | All     | [X]Int self pois sedative hypnotic in street/highway            |
| U2025               | All     | [X]Intent self pois sedative hypnotic trade/service area        |
| U2026               | All     | [X]Int self poison sedative hypnotic indust/construct area      |
| U2027               | All     | [X]Int self poison/exposure to sedative hypnotic on farm        |
| U202y               | All     | [X]Int self poison sedative hypnotic other spec place           |
| U202z               | All     | [X]Intent self poison sedative hypnotic unspecif place          |
| U203.               | All     | [X]Intent self poison/exposure to antiparkinson drug            |
| U2030               | All     | [X]Int self poison/exposure to antiparkinson drug at home       |
| U2031               | All     | [X]Intent self poison antiparkinson drug at res institut        |
| U2032               | All     | [X]Int self poison antiparkinson drug in school/pub admin area  |
| U2033               | All     | [X]Intent self pois antiparkinson drug in sport/athletic area   |
| U2034               | All     | [X]Int self pois antiparkinson drug in street/highway           |

|    |       |     |                                                               |
|----|-------|-----|---------------------------------------------------------------|
| 1  |       |     |                                                               |
| 2  |       |     |                                                               |
| 3  |       |     |                                                               |
| 4  | U2035 | All | [X]Intent self pois antiparkinson drug trade/service area     |
| 5  | U2036 | All | [X]Int self poison antiparkinson drug indust/construct area   |
| 6  | U2037 | All | [X]Int self poison/exposure to antiparkinson drug on farm     |
| 7  | U203y | All | [X]Int self poison antiparkinson drug other spec place        |
| 8  | U203z | All | [X]Intent self poison antiparkinson drug unspecif place       |
| 9  | U204. | All | [X]Intent self poison/exposure to psychotropic drug           |
| 10 | U2040 | All | [X]Int self poison/exposure to psychotropic drug at home      |
| 11 | U2041 | All | [X]Intent self poison psychotropic drug at res institut       |
| 12 | U2042 | All | [X]Int self poison psychotropic drug in school/pub admin area |
| 13 | U2043 | All | [X]Intent self pois psychotropic drug in sport/athletic area  |
| 14 | U2044 | All | [X]Int self pois psychotropic drug in street/highway          |
| 15 | U2045 | All | [X]Intent self pois psychotropic drug trade/service area      |
| 16 | U2046 | All | [X]Int self poison psychotropic drug indust/construct area    |
| 17 | U2047 | All | [X]Int self poison/exposure to psychotropic drug on farm      |
| 18 | U204y | All | [X]Int self poison psychotropic drug other spec place         |
| 19 | U204z | All | [X]Intent self poison psychotropic drug unspecif place        |
| 20 | U205. | All | [X]Intent self poison/exposure to narcotic drug               |
| 21 | U2050 | All | [X]Int self poison/exposure to narcotic drug at home          |
| 22 | U2051 | All | [X]Intent self poison narcotic drug at res institut           |
| 23 | U2052 | All | [X]Int self poison narcotic drug in school/pub admin area     |
| 24 | U2053 | All | [X]Intent self pois narcotic drug in sport/athletic area      |
| 25 | U2054 | All | [X]Int self pois narcotic drug in street/highway              |
| 26 | U2055 | All | [X]Intent self pois narcotic drug trade/service area          |
| 27 | U2056 | All | [X]Int self poison narcotic drug indust/construct area        |
| 28 | U2057 | All | [X]Int self poison/exposure to narcotic drug on farm          |
| 29 | U205y | All | [X]Int self poison narcotic drug other spec place             |
| 30 | U205z | All | [X]Intent self poison narcotic drug unspecif place            |
| 31 | U206. | All | [X]Intent self poison/exposure to hallucinogen                |
| 32 | U2060 | All | [X]Int self poison/exposure to hallucinogen at home           |
| 33 | U2061 | All | [X]Intent self poison hallucinogen at res institut            |
| 34 | U2062 | All | [X]Int self poison hallucinogen in school/pub admin area      |
| 35 | U2063 | All | [X]Intent self pois hallucinogen in sport/athletic area       |
| 36 | U2064 | All | [X]Int self pois hallucinogen in street/highway               |
| 37 | U2065 | All | [X]Intent self pois hallucinogen trade/service area           |
| 38 | U2066 | All | [X]Int self poison hallucinogen indust/construct area         |
| 39 | U2067 | All | [X]Int self poison/exposure to hallucinogen on farm           |
| 40 | U206y | All | [X]Int self poison hallucinogen other spec place              |
| 41 | U206z | All | [X]Intent self poison hallucinogen unspecif place             |
| 42 | U207. | All | [X]Intent self poison/exposure to oth autonom drug            |
| 43 | U2070 | All | [X]Int self poison/exposure to oth autonom drug at home       |
| 44 | U2071 | All | [X]Intent self poison oth autonom drug at res institut        |
| 45 | U2072 | All | [X]Int self poison oth autonom drug in school/pub admin area  |
| 46 | U2073 | All | [X]Intent self pois oth autonom drug in sport/athletic area   |
| 47 | U2074 | All | [X]Int self pois oth autonom drug in street/highway           |
| 48 | U2075 | All | [X]Intent self pois oth autonom drug trade/service area       |
| 49 |       |     |                                                               |
| 50 |       |     |                                                               |
| 51 |       |     |                                                               |
| 52 |       |     |                                                               |
| 53 |       |     |                                                               |
| 54 |       |     |                                                               |
| 55 |       |     |                                                               |
| 56 |       |     |                                                               |
| 57 |       |     |                                                               |
| 58 |       |     |                                                               |
| 59 |       |     |                                                               |
| 60 |       |     |                                                               |

|       |     |                                                                               |
|-------|-----|-------------------------------------------------------------------------------|
| U2076 | All | [X]Int self poison oth autonom drug indust/construct area                     |
| U2077 | All | [X]Int self poison/exposure to oth autonom drug on farm                       |
| U207y | All | [X]Int self poison oth autonom drug other spec place                          |
| U207z | All | [X]Intent self poison oth autonom drug unspecif place                         |
| U208. | All | [X]Intent self poison/exposure to other/unspec drug/medicament                |
| U2080 | All | [X]Int self poison/exposure to other/unspec drug/medicament at home           |
| U2081 | All | [X]Intent self poison other/unspec drug/medicament at res institut            |
| U2082 | All | [X]Int self poison other/unspec drug/medicament in school/pub admin area      |
| U2083 | All | [X]Intent self pois other/unspec drug/medicament in sport/athletic area       |
| U2084 | All | [X]Int self pois other/unspec drug/medicament in street/highway               |
| U2085 | All | [X]Intent self pois other/unspec drug/medicament trade/service area           |
| U2086 | All | [X]Int self poison other/unspec drug/medicament indust/construct area         |
| U2087 | All | [X]Int self poison/exposure to other/unspec drug/medicament on farm           |
| U208y | All | [X]Int self poison other/unspec drug/medicament other spec place              |
| U208z | All | [X]Intent self poison other/unspec drug/medicament unspecif place             |
| U209. | All | [X]Intent self poison/exposure to alcohol                                     |
| U2090 | All | [X]Int self poison/exposure to alcohol at home                                |
| U2091 | All | [X]Intent self poison alcohol at res institut                                 |
| U2092 | All | [X]Int self poison alcohol in school/pub admin area                           |
| U2093 | All | [X]Intent self pois alcohol in sport/athletic area                            |
| U2094 | All | [X]Int self pois alcohol in street/highway                                    |
| U2095 | All | [X]Intent self pois alcohol trade/service area                                |
| U2096 | All | [X]Int self poison alcohol indust/construct area                              |
| U2097 | All | [X]Int self poison/exposure alcohol on farm                                   |
| U209y | All | [X]Int self poison alcohol other spec place                                   |
| U209z | All | [X]Intent self poison alcohol unspecif place                                  |
| U20A. | All | [X]Intent self poison/exposure to organ solvent, halogen, hydrocarb           |
| U20A0 | All | [X]Int self poison/exposure to organ solvent, halogen, hydrocarb at home      |
| U20A1 | All | [X]Intent self poison organ solvent, halogen, hydrocarb at res institut       |
| U20A2 | All | [X]Int self poison organ solvent, halogen, hydrocarb in school/pub admin area |
| U20A3 | All | [X]Intent self pois organ solvent, halogen, hydrocarb in sport/athletic area  |
| U20A4 | All | [X]Int self pois organ solvent, halogen, hydrocarb in street/highway          |
| U20A5 | All | [X]Intent self pois organ solvent, halogen, hydrocarb trade/service area      |
| U20A6 | All | [X]Int self poison organ solvent, halogen, hydrocarb indust/construct area    |
| U20A7 | All | [X]Int self poison/exposure organ solvent, halogen, hydrocarb on farm         |
| U20Ay | All | [X]Int self poison organ solvent, halogen, hydrocarb other spec place         |

|                       |                |                                                                        |
|-----------------------|----------------|------------------------------------------------------------------------|
| U20Az                 | All            | [X]Intent self poison organ solvent, halogen, hydrocarb unspecif place |
| U20B.                 | All            | [X]Intent self poison/exposure to other gas/vapour                     |
| U20B0                 | All            | [X]Int self poison/exposure to other gas/vapour at home                |
| U20B1                 | All            | [X]Intent self poison other gas/vapour at res institut                 |
| U20B2                 | All            | [X]Int self poison other gas/vapour in school/pub admin area           |
| U20B3                 | All            | [X]Intent self pois other gas/vapour in sport/athletic area            |
| U20B4                 | All            | [X]Int self pois other gas/vapour in street/highway                    |
| U20B5                 | All            | [X]Intent self pois other gas/vapour trade/service area                |
| U20B6                 | All            | [X]Int self poison other gas/vapour indust/construct area              |
| U20B7                 | All            | [X]Int self poison/exposure other gas/vapourl on farm                  |
| U20By                 | All            | [X]Int self poison other gas/vapour other spec place                   |
| U20Bz                 | All            | [X]Intent self poison other gas/vapour unspecif place                  |
| U20C.                 | All            | [X]Intent self poison/exposure to pesticide                            |
| U20C0                 | All            | [X]Int self poison/exposure to pesticide at home                       |
| U20C1                 | All            | [X]Intent self poison pesticide at res institut                        |
| U20C2                 | All            | [X]Int self poison pesticide in school/pub admin area                  |
| U20C3                 | All            | [X]Intent self pois pesticide in sport/athletic area                   |
| U20C4                 | All            | [X]Int self pois pesticide in street/highway                           |
| U20C5                 | All            | [X]Intent self pois pesticidel trade/service area                      |
| U20C6                 | All            | [X]Int self poison pesticide indust/construct area                     |
| U20C7                 | All            | [X]Int self poison/exposure pesticide on farm                          |
| U20Cy                 | All            | [X]Int self poison pesticide other spec place                          |
| U20Cz                 | All            | [X]Intent self poison pesticide unspecif place                         |
| U20y.                 | All            | [X]Intent self poison/exposure to unspecif chemical                    |
| U20y0                 | All            | [X]Int self poison/exposure to unspecif chemical at home               |
| U20y1                 | All            | [X]Intent self poison unspecif chemical at res institut                |
| U20y2                 | All            | [X]Int self poison unspecif chemical in school/pub admin area          |
| U20y3                 | All            | [X]Intent self pois unspecif chemical in sport/athletic area           |
| U20y4                 | All            | [X]Int self pois unspecif chemical in street/highway                   |
| U20y5                 | All            | [X]Intent self pois unspecif chemical trade/service area               |
| U20y6                 | All            | [X]Int self poison unspecif chemical indust/construct area             |
| U20y7                 | All            | [X]Int self poison/exposure unspecif chemical on farm                  |
| U20yy                 | All            | [X]Int self poison unspecif chemical other spec place                  |
| U20yz                 | All            | [X]Intent self poison unspecif chemical unspecif place                 |
| 14K0.                 | All            | H/O: repeated overdose                                                 |
| 1JP..                 | All            | Suspected drug overdose                                                |
| TK...                 | All            | Cause of overdose - deliberate                                         |
| <b>Read CTV3 Code</b> | <b>Term ID</b> | <b>Description</b>                                                     |
| U200.                 | All            | [X]Intent self poison/exposure to nonopioid analgesic                  |
| U2000                 | All            | [X]Int self poison/exposure to nonopioid analgesic at home             |
| U2001                 | All            | [X]Intent self poison nonopioid analgesic at res institut              |
| U2002                 | All            | [X]Int self poison nonopioid analgesic in school/pub admin area        |
| U2003                 | All            | [X]Intent self pois nonopioid analgesic in sport/athletic area         |

|       |     |                                                                |
|-------|-----|----------------------------------------------------------------|
| U2004 | All | [X]Int self pois to nonopioid analgesic in street/highway      |
| U2005 | All | [X]Intent self pois to nonopioid analgesic trade/service area  |
| U2006 | All | [X]Int self pois to nonopioid analgesic indust/construct area  |
| U2007 | All | [X]Int self poison/exposure to nonopioid analgesic on farm     |
| U200y | All | [X]Int self poison nonopioid analgesic other spec place        |
| U200z | All | [X]Intent self poison to nonopioid analgesic unspecif place    |
| U201. | All | [X]Intent self poison/exposure to antiepileptic                |
| U2010 | All | [X]Int self poison/exposure to antiepileptic at home           |
| U2011 | All | [X]Intent self poison antiepileptic at res institut            |
| U2012 | All | [X]Int self poison antiepileptic in school/pub admin area      |
| U2013 | All | [X]Intent self pois antiepileptic in sport/athletic area       |
| U2014 | All | [X]Int self pois antiepileptic in street/highway               |
| U2015 | All | [X]Intent self pois antiepileptic trade/service area           |
| U2016 | All | [X]Int self poison antiepileptic indust/construct area         |
| U2017 | All | [X]Int self poison/exposure to antiepileptic on farm           |
| U201y | All | [X]Int self poison antiepileptic other spec place              |
| U201z | All | [X]Intent self poison antiepileptic unspecif place             |
| U2030 | All | [X]Int self poison/exposure to antiparkinson drug at home      |
| U2031 | All | [X]Intent self poison antiparkinson drug at res institut       |
| U2032 | All | [X]Int self poison antiparkinson drug in school/pub admin area |
| U2033 | All | [X]Intent self pois antiparkinson drug in sport/athletic area  |
| U2034 | All | [X]Int self pois antiparkinson drug in street/highway          |
| U2035 | All | [X]Intent self pois antiparkinson drug trade/service area      |
| U2036 | All | [X]Int self poison antiparkinson drug indust/construct area    |
| U2037 | All | [X]Int self poison/exposure to antiparkinson drug on farm      |
| U203y | All | [X]Int self poison antiparkinson drug other spec place         |
| U203z | All | [X]Intent self poison antiparkinson drug unspecif place        |
| XE22f | All | [X]Intent self poison/exposure to narcotic drug                |
| U2050 | All | [X]Int self poison/exposure to narcotic drug at home           |
| U2051 | All | [X]Intent self poison narcotic drug at res institut            |
| U2052 | All | [X]Int self poison narcotic drug in school/pub admin area      |
| U2053 | All | [X]Intent self pois narcotic drug in sport/athletic area       |
| U2054 | All | [X]Int self pois narcotic drug in street/highway               |
| U2055 | All | [X]Intent self pois narcotic drug trade/service area           |
| U2056 | All | [X]Int self poison narcotic drug indust/construct area         |
| U2057 | All | [X]Int self poison/exposure to narcotic drug on farm           |
| U205y | All | [X]Int self poison narcotic drug other spec place              |
| U205z | All | [X]Intent self poison narcotic drug unspecif place             |
| U206. | All | [X]Intent self poison/exposure to hallucinogen                 |
| U2060 | All | [X]Int self poison/exposure to hallucinogen at home            |
| U2061 | All | [X]Intent self poison hallucinogen at res institut             |
| U2062 | All | [X]Int self poison hallucinogen in school/pub admin area       |
| U2063 | All | [X]Intent self pois hallucinogen in sport/athletic area        |
| U2064 | All | [X]Int self pois hallucinogen in street/highway                |
| U2065 | All | [X]Intent self pois hallucinogen trade/service area            |



|    |       |     |                                                                     |
|----|-------|-----|---------------------------------------------------------------------|
| 1  |       |     |                                                                     |
| 2  |       |     |                                                                     |
| 3  |       |     |                                                                     |
| 4  | U2066 | All | [X]Int self poison hallucinogen indust/construct area               |
| 5  | U2067 | All | [X]Int self poison/exposure to hallucinogen on farm                 |
| 6  | U206y | All | [X]Int self poison hallucinogen other spec place                    |
| 7  | U206z | All | [X]Intent self poison hallucinogen unspecif place                   |
| 8  |       |     |                                                                     |
| 9  | U207. | All | [X]Intent self poison/exposure to oth autonom drug                  |
| 10 | U2070 | All | [X]Int self poison/exposure to oth autonom drug at home             |
| 11 | U2071 | All | [X]Intent self poison oth autonom drug at res institut              |
| 12 | U2072 | All | [X]Int self poison oth autonom drug in school/pub admin area        |
| 13 | U2073 | All | [X]Intent self pois oth autonom drug in sport/athletic area         |
| 14 | U2074 | All | [X]Int self pois oth autonom drug in street/highway                 |
| 15 | U2075 | All | [X]Intent self pois oth autonom drug trade/service area             |
| 16 | U2076 | All | [X]Int self poison oth autonom drug indust/construct area           |
| 17 | U2077 | All | [X]Int self poison/exposure to oth autonom drug on farm             |
| 18 | U207y | All | [X]Int self poison oth autonom drug other spec place                |
| 19 | U207z | All | [X]Intent self poison oth autonom drug unspecif place               |
| 20 | U208. | All | [X]Intent self poison/exposure to other/unspec drug/medicament      |
| 21 |       |     | [X]Int self poison/exposure to other/unspec drug/medicament at      |
| 22 | U2080 | All | home                                                                |
| 23 | U2081 | All | [X]Intent self poison other/unspec drug/medicament at res institut  |
| 24 |       |     | [X]Int self poison other/unspec drug/medicament in school/pub       |
| 25 | U2082 | All | admin area                                                          |
| 26 |       |     | [X]Intent self pois other/unspec drug/medicament in sport/athletic  |
| 27 | U2083 | All | area                                                                |
| 28 | U2084 | All | [X]Int self pois other/unspec drug/medicament in street/highway     |
| 29 |       |     | [X]Intent self pois other/unspec drug/medicament trade/service      |
| 30 | U2085 | All | area                                                                |
| 31 |       |     | [X]Int self poison other/unspec drug/medicament indust/construct    |
| 32 | U2086 | All | area                                                                |
| 33 |       |     | [X]Int self poison/exposure to other/unspec drug/medicament on      |
| 34 | U2087 | All | farm                                                                |
| 35 | U208y | All | [X]Int self poison other/unspec drug/medicament other spec place    |
| 36 | U208z | All | [X]Intent self poison other/unspec drug/medicament unspecif place   |
| 37 | SyuFc | All | [X]Poisoning by other & unspecified drugs and biologic substances   |
| 38 | U209. | All | [X]Intent self poison/exposure to alcohol                           |
| 39 | U2090 | All | [X]Int self poison/exposure to alcohol at home                      |
| 40 | U2091 | All | [X]Intent self poison alcohol at res institut                       |
| 41 | U2092 | All | [X]Int self poison alcohol in school/pub admin area                 |
| 42 | U2093 | All | [X]Intent self pois alcohol in sport/athletic area                  |
| 43 | U2094 | All | [X]Int self pois alcohol in street/highway                          |
| 44 | U2095 | All | [X]Intent self pois alcohol trade/service area                      |
| 45 | U2096 | All | [X]Int self poison alcohol indust/construct area                    |
| 46 | U2097 | All | [X]Int self poison/exposure alcohol on farm                         |
| 47 | U209y | All | [X]Int self poison alcohol other spec place                         |
| 48 | U209z | All | [X]Intent self poison alcohol unspecif place                        |
| 49 | U20A. | All | [X]Intent self poison/exposure to organ solvent, halogen, hydrocarb |
| 50 |       |     | [X]Int self poison/exposure to organ solvent, halogen, hydrocarb at |
| 51 | U20A0 | All | home                                                                |
| 52 |       |     |                                                                     |
| 53 |       |     |                                                                     |
| 54 |       |     |                                                                     |
| 55 |       |     |                                                                     |
| 56 |       |     |                                                                     |
| 57 |       |     |                                                                     |
| 58 |       |     |                                                                     |
| 59 |       |     |                                                                     |
| 60 |       |     |                                                                     |



|       |     |                                                                               |
|-------|-----|-------------------------------------------------------------------------------|
| U20A1 | All | [X]Intent self poison organ solvent, halogen, hydrocarbat res institut        |
| U20A2 | All | [X]Int self poison organ solvent, halogen, hydrocarb in school/pub admin area |
| U20A3 | All | [X]Intent self pois organ solvent, halogen, hydrocarb in sport/athletic area  |
| U20A4 | All | [X]Int self pois organ solvent, halogen, hydrocarb in street/highway          |
| U20A5 | All | [X]Intent self pois organ solvent, halogen, hydrocarb trade/service area      |
| U20A6 | All | [X]Int self poison organ solvent, halogen, hydrocarb indust/construct area    |
| U20A7 | All | [X]Int self poison/exposure organ solvent, halogen, hydrocarb on farm         |
| U20Ay | All | [X]Int self poison organ solvent, halogen, hydrocarb other spec place         |
| U20Az | All | [X]Intent self poison organ solvent, halogen, hydrocarb unspecif place        |
| XE22g | All | [X]Intent self poison/exposure to other gas/vapour                            |
| U20B0 | All | [X]Int self poison/exposure to other gas/vapour at home                       |
| U20B1 | All | [X]Intent self poison other gas/vapour at res institut                        |
| U20B2 | All | [X]Int self poison other gas/vapour in school/pub admin area                  |
| U20B3 | All | [X]Intent self pois other gas/vapour in sport/athletic area                   |
| U20B4 | All | [X]Int self pois other gas/vapour in street/highway                           |
| U20B5 | All | [X]Intent self pois other gas/vapour trade/service area                       |
| U20B6 | All | [X]Int self poison other gas/vapour indust/construct area                     |
| U20B7 | All | [X]Int self poison/exposure other gas/vapourl on farm                         |
| U20By | All | [X]Int self poison other gas/vapour other spec place                          |
| U20Bz | All | [X]Intent self poison other gas/vapour unspecif place                         |
| U20C. | All | [X]Intent self poison/exposure to pesticide                                   |
| U20C0 | All | [X]Int self poison/exposure to pesticide at home                              |
| U20C1 | All | [X]Intent self poison pesticide at res institut                               |
| U20C2 | All | [X]Int self poison pesticide in school/pub admin area                         |
| U20C3 | All | [X]Intent self pois pesticide in sport/athletic area                          |
| U20C4 | All | [X]Int self pois pesticide in street/highway                                  |
| U20C5 | All | [X]Intent self pois pesticidel trade/service area                             |
| U20C6 | All | [X]Int self poison pesticide indust/construct area                            |
| U20C7 | All | [X]Int self poison/exposure pesticide on farm                                 |
| U20Cy | All | [X]Int self poison pesticide other spec place                                 |
| U20Cz | All | [X]Intent self poison pesticide unspecif place                                |
| Xa59l | All | Intentional pesticide product poisoning                                       |
| U20y. | All | [X]Intent self poison/exposure to unspecif chemical                           |
| U20y0 | All | [X]Int self poison/exposure to unspecif chemical at home                      |
| U20y1 | All | [X]Intent self poison unspecif chemical at res institut                       |
| U20y2 | All | [X]Int self poison unspecif chemical in school/pub admin area                 |
| U20y3 | All | [X]Intent self pois unspecif chemical in sport/athletic area                  |
| U20y4 | All | [X]Int self pois unspecif chemical in street/highway                          |
| U20y5 | All | [X]Intent self pois unspecif chemical trade/service area                      |
| U20y6 | All | [X]Int self poison unspecif chemical indust/construct area                    |

|       |     |                                                                                     |
|-------|-----|-------------------------------------------------------------------------------------|
| U20y7 | All | [X]Int self poison/exposure unspecif chemical on farm                               |
| U20yy | All | [X]Int self poison unspecif chemical other spec place                               |
| U20yz | All | [X]Intent self poison unspecif chemical unspecif place                              |
| TK0z. | All | Suicide and selfinflicted poisoning by solid and liquid substances NOS              |
| XM0Ba | All | Deliberate self poisoning                                                           |
| TK0.. | All | Suicide and selfinflicted poisoning by solid and liquid substances                  |
| X71Am | All | Deliberate overdose of drug or pharmaceutical preparation                           |
| TK00. | All | Suicide and selfinflicted poisoning by analgesics, antipyretics and anti-rheumatics |
| TK01. | All | Suicide and selfinflicted poisoning by barbiturates                                 |
| TK010 | All | Suicide and self inflicted injury by amobarbital                                    |
| TK011 | All | Suicide and self inflicted injury by Barbitone                                      |
| TK012 | All | Suicide and self inflicted injury by Butabarbitone                                  |
| TK013 | All | Suicide and self inflicted injury by Pentabarbitone                                 |
| TK014 | All | Suicide and self inflicted injury by phenobarbital                                  |
| TK015 | All | Suicide and self inflicted injury by secobarbital                                   |
| TK01z | All | Suicide and self inflicted injury by barbiturates                                   |
| TK02. | All | Suicide and selfinflicted poisoning by other sedatives and hypnotics                |
| TK03. | All | Suicide and selfinflicted poisoning by tranquillisers and other psychotropic agents |
| TK04. | All | Suicide and selfinflicted poisoning by other drugs and medicines                    |
| TK05. | All | Suicide and selfinflicted poisoning by drug or medicine NOS                         |
| X71Ap | All | Deliberate overdose of aspirin                                                      |
| X71Ax | All | Deliberate overdose of diazepam                                                     |
| X71Av | All | Deliberate overdose of methadone                                                    |
| X71Az | All | Deliberate overdose of temazepam                                                    |
| X71Ar | All | Deliberate overdose of co-proxamol                                                  |
| X71At | All | Deliberate overdose of diamorphine                                                  |
| X71Aw | All | Deliberate overdose of benzodiazepine                                               |
| X71Au | All | Deliberate overdose of dihydrocodeine                                               |
| X71As | All | Deliberate overdose of opiate analgesic                                             |
| X71Ay | All | Deliberate overdose of chlordiazepoxide                                             |
| X71Aq | All | Deliberate overdose of combined analgesic                                           |
| X71An | All | Deliberate overdose of non-opiate analgesics                                        |
| Xa0Jl | All | Deliberate overdose of non-steroidal anti-inflammatory agent                        |
| XaR4S | All | Intentional overdose of prescription only medication                                |
| Xa62F | All | Intentional over-the-counter product overdose                                       |
| Xa65i | All | Intentional bismuth compound overdose                                               |
| Xa65m | All | Intentional sucralfate overdose                                                     |
| Xa65q | All | Intentional liquorice overdose                                                      |
| Xa65u | All | Intentional misoprostol overdose                                                    |
| Xa65z | All | Intentional cimetidine overdose                                                     |
| Xa663 | All | Intentional famotidine overdose                                                     |
| Xa667 | All | Intentional nizatidine overdose                                                     |

|       |     |                                                |
|-------|-----|------------------------------------------------|
| Xa66B | All | Intentional ranitidine overdose                |
| Xa66D | All | Intentional overdose of H2 antagonist          |
| Xa66I | All | Intentional omeprazole overdose                |
| Xa66M | All | Intentional lansoprazole overdose              |
| Xa66Q | All | Intentional carbenoxolone overdose             |
| Xa66U | All | Intentional pirenzepine overdose               |
| Xa66Y | All | Intentional 5-aminosalicylic acid overdose     |
| Xa66d | All | Intentional aluminium hydroxide overdose       |
| Xa66h | All | Intentional magnesium trisilicate overdose     |
| Xa66l | All | Intentional loperamide overdose                |
| Xa66p | All | Intentional kaolin overdose                    |
| Xa66u | All | Intentional cisapride overdose                 |
| Xa66z | All | Intentional nabilone overdose                  |
| Xa673 | All | Intentional domperidone overdose               |
| Xa677 | All | Intentional metoclopramide overdose            |
| Xa67B | All | Intentional 5-HT3-receptor antagonist overdose |
| Xa67G | All | Intentional bisacodyl overdose                 |
| Xa67K | All | Intentional dantron overdose                   |
| Xa67O | All | Intentional sodium picosulfate overdose        |
| Xa67S | All | Intentional lactulose overdose                 |
| Xa67W | All | Intentional magnesium sulphate overdose        |
| Xa67a | All | Intentional bulk-forming laxative overdose     |
| Xa67e | All | Intentional anthraquinone laxative overdose    |
| Xa67i | All | Intentional cascara overdose                   |
| Xa67m | All | Intentional senna overdose                     |
| Xa67q | All | Intentional docusate overdose                  |
| Xa67v | All | Intentional castor oil overdose                |
| Xa67z | All | Intentional phenolphthalein overdose           |
| Xa684 | All | Intentional dioctyl sulphosuccinate overdose   |
| Xa688 | All | Intentional antispasmodic overdose             |
| Xa68C | All | Intentional bile agent overdose                |
| Xa69o | All | Intentional immunostimulant overdose           |
| Xa69u | All | Intentional mitobronitol overdose              |
| Xa69y | All | Intentional busulfan overdose                  |
| Xa6A2 | All | Intentional treosulfan overdose                |
| Xa6A6 | All | Intentional thiotepa overdose                  |
| Xa6AB | All | Intentional chlorambucil overdose              |
| Xa6AF | All | Intentional cyclophosphamide overdose          |
| Xa6AJ | All | Intentional ethoglucid overdose                |
| Xa6AN | All | Intentional ifosfamide overdose                |
| Xa6AR | All | Intentional melphalan overdose                 |
| Xa6AV | All | Intentional estramustine overdose              |
| Xa6AZ | All | Intentional chlormethine overdose              |
| Xa6Ae | All | Intentional carmustine overdose                |
| Xa6Ai | All | Intentional lomustine overdose                 |

|       |     |                                                  |
|-------|-----|--------------------------------------------------|
| Xa6An | All | Intentional dacarbazine overdose                 |
| Xa6As | All | Intentional dactinomycin overdose                |
| Xa6Aw | All | Intentional bleomycin overdose                   |
| Xa6B0 | All | Intentional mitomycin overdose                   |
| Xa6B4 | All | Intentional plicamycin overdose                  |
| Xa6B8 | All | Intentional aclarubicin overdose                 |
| Xa6BC | All | Intentional mitoxantrone overdose                |
| Xa6BG | All | Intentional doxorubicin overdose                 |
| Xa6BK | All | Intentional epirubicin overdose                  |
| Xa6B0 | All | Intentional idarubicin overdose                  |
| Xa6BT | All | Intentional mercuric oxide overdose              |
| Xa6BX | All | Intentional methotrexate overdose                |
| Xa6Bb | All | Intentional mercaptopurine overdose              |
| Xa6Bf | All | Intentional tioguanine overdose                  |
| Xa6Bj | All | Intentional pentostatin overdose                 |
| Xa6Bn | All | Intentional cytarabine overdose                  |
| Xa6Br | All | Intentional fluorouracil overdose                |
| Xa6Bv | All | Intentional etoposide overdose                   |
| Xa6Bz | All | Intentional amsacrine overdose                   |
| Xa6C3 | All | Intentional carboplatin overdose                 |
| Xa6C7 | All | Intentional cisplatin overdose                   |
| Xa6CB | All | Intentional hydroxycarbamide overdose            |
| Xa6CF | All | Intentional procarbazine overdose                |
| Xa6CJ | All | Intentional razoxane overdose                    |
| Xa6CN | All | Intentional crisantaspase overdose               |
| Xa6CR | All | Intentional paclitaxel overdose                  |
| Xa6CV | All | Intentional fludarabine overdose                 |
| Xa6CZ | All | Intentional aminoglutethimide overdose           |
| Xa6Ce | All | Intentional trilostane overdose                  |
| Xa6Ci | All | Intentional tamoxifen overdose                   |
| Xa6Cm | All | Intentional formestane overdose                  |
| Xa6Cr | All | Intentional vinblastine overdose                 |
| Xa6Cv | All | Intentional vincristine overdose                 |
| Xa6Cz | All | Intentional vindesine overdose                   |
| Xa6D4 | All | Intentional ciclosporin overdose                 |
| Xa6D8 | All | Intentional azathioprine overdose                |
| Xa6DD | All | Intentional central appetite depressant overdose |
| Xa6DI | All | Intentional levodopa overdose                    |
| Xa6DM | All | Intentional amantadine overdose                  |
| Xa6DQ | All | Intentional lisuride overdose                    |
| Xa6DU | All | Intentional bromocriptine overdose               |
| Xa6DZ | All | Intentional lithium overdose                     |
| Xa6Dd | All | Intentional amitriptyline overdose               |
| Xa6Dh | All | Intentional amoxapine overdose                   |
| Xa6DI | All | Intentional butriptyline overdose                |

|       |     |                                                  |
|-------|-----|--------------------------------------------------|
| Xa6Dp | All | Intentional clomipramine overdose                |
| Xa6Dt | All | Intentional desipramine overdose                 |
| Xa6Dx | All | Intentional dosulepin overdose                   |
| Xa6E1 | All | Intentional doxepin overdose                     |
| Xa6E5 | All | Intentional imipramine overdose                  |
| Xa6E9 | All | Intentional iprindole overdose                   |
| Xa6ED | All | Intentional lofepramine overdose                 |
| Xa6EH | All | Intentional nortriptyline overdose               |
| Xa6EL | All | Intentional protriptyline overdose               |
| Xa6EP | All | Intentional trimipramine overdose                |
| Xa6Zp | All | Intentional overdose of tricyclic antidepressant |
| Xa6EU | All | Intentional phenelzine overdose                  |
| Xa6EY | All | Intentional iproniazid overdose                  |
| Xa6Ec | All | Intentional isocarboxazid overdose               |
| Xa6Eg | All | Intentional tranlycypromine overdose             |
| Xa6Ek | All | Intentional moclobemide overdose                 |
| Xa6Eo | All | Intentional tryptophan overdose                  |
| Xa6Es | All | Intentional venlafaxine overdose                 |
| Xa6Ex | All | Intentional sertraline overdose                  |
| Xa6F1 | All | Intentional paroxetine overdose                  |
| Xa6F5 | All | Intentional nefazodone overdose                  |
| Xa6F9 | All | Intentional citalopram overdose                  |
| Xa6FD | All | Intentional fluoxetine overdose                  |
| Xa6FH | All | Intentional fluvoxamine overdose                 |
| Xa6FM | All | Intentional maprotiline overdose                 |
| Xa6FQ | All | Intentional mianserin overdose                   |
| Xa6FU | All | Intentional trazodone overdose                   |
| Xa6FY | All | Intentional viloxazine overdose                  |
| Xa6Fd | All | Intentional beclamide overdose                   |
| Xa6Fh | All | Intentional lamotrigine overdose                 |
| Xa6Fl | All | Intentional piracetam overdose                   |
| Xa6Fp | All | Intentional gabapentin overdose                  |
| Xa6Ft | All | Intentional overdose by sodium valproate         |
| Xa6Fy | All | Intentional methylphenobarbital overdose         |
| Xa6G2 | All | Intentional phenobarbital overdose               |
| Xa6G6 | All | Intentional primidone overdose                   |
| Xa6GA | All | Intentional overdose by carbamazepine            |
| Xa6GE | All | Intentional vigabatrin overdose                  |
| X711g | All | Accidental overdose of phenytoin                 |
| Xa6GL | All | Intentional ethosuximide overdose                |
| Xa6GP | All | Intentional clonazepam overdose                  |
| Xa6GV | All | Intentional zopiclone overdose                   |
| Xa6GZ | All | Intentional zolpidem overdose                    |
| Xa6Gd | All | Intentional chlormezanone overdose               |
| Xa6Gh | All | Intentional methyprylone overdose                |

|       |     |                                              |
|-------|-----|----------------------------------------------|
| Xa6Gl | All | Intentional paraldehyde overdose             |
| Xa6Gq | All | Intentional amobarbital overdose             |
| Xa6Gu | All | Intentional butabarbital overdose            |
| Xa6Gy | All | Intentional cyclobarbitone overdose          |
| Xa6H2 | All | Intentional secobarbital overdose            |
| Xa6H7 | All | Intentional flunitrazepam overdose           |
| Xa6HB | All | Intentional flurazepam overdose              |
| Xa6HF | All | Intentional loprozepam overdose              |
| Xa6HJ | All | Intentional lormetazepam overdose            |
| Xa6HN | All | Intentional nitrazepam overdose              |
| Xa6HR | All | Intentional triazolam overdose               |
| Xa6HV | All | Intentional alprazolam overdose              |
| Xa6HZ | All | Intentional bromazepam overdose              |
| X71Ay | All | Deliberate overdose of chlordiazepoxide      |
| Xa6Hg | All | Intentional clobazam overdose                |
| Xa6Hk | All | Intentional dipotassium clorazepate overdose |
| Xa6Ho | All | Intentional ketazolam overdose               |
| Xa6Hs | All | Intentional medazepam overdose               |
| Xa6Hw | All | Intentional oxazepam overdose                |
| Xa6I0 | All | Intentional prazepam overdose                |
| Xa6I4 | All | Intentional midazolam overdose               |
| X71Ax | All | Deliberate overdose of diazepam              |
| Xa6IB | All | Intentional lorazepam overdose               |
| X71Az | All | Deliberate overdose of temazepam             |
| X71Aw | All | Deliberate overdose of benzodiazepine        |
| Xa6IL | All | Intentional meprobamate overdose             |
| Xa6IQ | All | Intentional chloral hydrate overdose         |
| Xa6IU | All | Intentional dichloralphenazone overdose      |
| Xa6IY | All | Intentional triclofos sodium overdose        |
| Xa6Ic | All | Intentional buspirone overdose               |
| Xa6Ig | All | Intentional clomethiazole overdose           |
| Xa6Il | All | Intentional sulphiride overdose              |
| Xa6Ip | All | Intentional loxapine overdose                |
| Xa6It | All | Intentional clozapine overdose               |
| Xa6Ix | All | Intentional risperidone overdose             |
| Xa6J1 | All | Intentional tetrabenazine overdose           |
| Xa6J6 | All | Intentional benperidol overdose              |
| Xa6JA | All | Intentional trifluoperidol overdose          |
| Xa6JE | All | Intentional haloperidol overdose             |
| Xa6JI | All | Intentional droperidol overdose              |
| Xa6JN | All | Intentional pimozide overdose                |
| Xa6JR | All | Intentional fluspirilene overdose            |
| Xa6JW | All | Intentional levomepromazine overdose         |
| Xa6Ja | All | Intentional pericyazine overdose             |
| Xa6Je | All | Intentional fluphenazine decanoate overdose  |



|       |     |                                                       |
|-------|-----|-------------------------------------------------------|
| Xa6Ji | All | Intentional fluphenazine enanthate overdose           |
| Xa6Jm | All | Intentional thiethylperazine overdose                 |
| Xa6Jq | All | Intentional chlorpromazine overdose                   |
| Xa6Ju | All | Intentional pipotiazine overdose                      |
| Xa6Jy | All | Intentional promazine overdose                        |
| Xa6K2 | All | Intentional thioridazine overdose                     |
| Xa6K6 | All | Intentional perphenazine overdose                     |
| Xa6KA | All | Intentional prochlorperazine overdose                 |
| Xa6KE | All | Intentional trifluoperazine overdose                  |
| Xa6KJ | All | Intentional chlorprothixene overdose                  |
| Xa6KN | All | Intentional flupentixol decanoate overdose            |
| Xa6KR | All | Intentional zuclopenthixol decanoate overdose         |
| Xa6KV | All | Intentional zuclopenthixol overdose                   |
| Xa6KZ | All | Intentional flupentixol overdose                      |
| Xa6Kd | All | Intentional oxypertine overdose                       |
| Xa6Kh | All | Intentional remoxipride overdose                      |
| Xa6Kj | All | Intentional overdose of non-barbiturate hypnotic      |
| Xa6Ko | All | Intentional selegiline overdose                       |
| Xa6Kt | All | Intentional amfetamine overdose                       |
| Xa6Ky | All | Intentional antabuse overdose                         |
| Xa6L3 | All | Intentional cannabis overdose                         |
| Xa6L7 | All | Intentional overdose by lysergic acid                 |
| Xa6LB | All | Intentional psilocybin overdose                       |
| Xa6LF | All | Intentional mescaline overdose                        |
| Xa6LJ | All | Intentional overdose of ecstasy                       |
| Xa6LN | All | Intentional overdose by cocaine                       |
| Xa6LR | All | Intentional overdose by crack cocaine                 |
| Xa6LV | All | Intentional caffeine overdose                         |
| Xa6Lb | All | Intentional atenolol overdose                         |
| Xa6Lf | All | Intentional propranolol overdose                      |
| Xa6Lh | All | Intentional overdose of beta-adrenergic blocking drug |
| Xa6Lm | All | Intentional phenoxybenzamine overdose                 |
| Xa6Lq | All | Intentional nicotine overdose                         |
| Xa6Lu | All | Intentional overdose by calcium-channel blockers      |
| Xa6Lz | All | Intentional pilocarpine overdose                      |
| Xa6M3 | All | Intentional acetylcholine overdose                    |
| Xa6M7 | All | Intentional anticholinesterase overdose               |
| Xa6MD | All | Intentional metaraminol overdose                      |
| Xa6MI | All | Intentional salbutamol overdose                       |
| Xa6ML | All | Intentional overdose of isoprenaline                  |
| Xa6MQ | All | Intentional clonidine overdose                        |
| Xa6MV | All | Intentional hyoscine overdose                         |
| Xa6MZ | All | Intentional atropine overdose                         |
| Xa6Me | All | Intentional acetylcysteine overdose                   |
| Xa6Mj | All | Intentional nikethamide overdose                      |



|       |     |                                                  |
|-------|-----|--------------------------------------------------|
| Xa6Mo | All | Intentional chlorphenamine overdose              |
| Xa6Ms | All | Intentional diphenhydramine overdose             |
| Xa6N0 | All | Intentional thonzylamine overdose                |
| Xa6N4 | All | Intentional tripeleennamine overdose             |
| Xa6N8 | All | Intentional hydroxyzine overdose                 |
| Xa6ND | All | Intentional aminophylline overdose               |
| Xa6NH | All | Intentional theophylline overdose                |
| Xa6NL | All | Intentional bronchodilator preparations overdose |
| Xa6NR | All | Intentional dithranol overdose                   |
| Xa6NW | All | Intentional gamolenic acid overdose              |
| Xa6Nb | All | Intentional etretinate overdose                  |
| Xa6Nf | All | Intentional acitretin overdose                   |
| Xa6Nj | All | Intentional tretinoin overdose                   |
| Xa6Nn | All | Intentional isotretinoin overdose                |
| Xa6Nt | All | Intentional allopurinol overdose                 |
| Xa6Nx | All | Intentional colchicine overdose                  |
| Xa6O3 | All | Intentional baclofen overdose                    |
| Xa6O7 | All | Intentional methocarbamol overdose               |
| Xa6OB | All | Intentional gold salt overdose                   |
| Xa6OG | All | Intentional papaverine overdose                  |
| Xa6OL | All | Intentional prostaglandin overdose               |
| Xa6OS | All | Intentional naloxone overdose                    |
| Xa6OW | All | Intentional protamine sulphate overdose          |
| Xa6Oa | All | Intentional alternative medicine overdose        |
| Xa6Oj | All | Intentional flucytosine overdose                 |
| Xa6On | All | Intentional griseofulvin overdose                |
| Xa6Or | All | Intentional amphotericin B overdose              |
| Xa6Ov | All | Intentional nystatin overdose                    |
| Xa6P0 | All | Intentional idoxuridine overdose                 |
| Xa6P5 | All | Intentional pyrimethamine overdose               |
| Xa6P9 | All | Intentional chloroquine overdose                 |
| Xa6PD | All | Intentional primaquine overdose                  |
| Xa6PH | All | Intentional quinine overdose                     |
| Xa6PL | All | Intentional mefloquine overdose                  |
| Xa6PP | All | Intentional proguanil overdose                   |
| Xa6PU | All | Intentional piperazine overdose                  |
| Xa6PY | All | Intentional tiabendazole overdose                |
| Xa6Pe | All | Intentional kanamycin overdose                   |
| Xa6Pi | All | Intentional streptomycin overdose                |
| Xa6Pm | All | Intentional gentamicin overdose                  |
| Xa6Pq | All | Intentional tobramycin overdose                  |
| Xa6Pu | All | Intentional netilmicin overdose                  |
| Xa6Pz | All | Intentional erythromycin overdose                |
| Xa6Q3 | All | Intentional azithromycin overdose                |
| Xa6Q7 | All | Intentional clarithromycin overdose              |

|       |     |                                                |
|-------|-----|------------------------------------------------|
| Xa6QB | All | Intentional sodium fusidate overdose           |
| Xa6QF | All | Intentional spectinomycin overdose             |
| Xa6QJ | All | Intentional vancomycin overdose                |
| Xa6QN | All | Intentional trimethoprim overdose              |
| Xa6QR | All | Intentional nitrofurantoin derivative overdose |
| Xa6QV | All | Intentional fusidic acid overdose              |
| Xa6QZ | All | Intentional 4-quinolones overdose              |
| Xa6Qe | All | Intentional ampicillin overdose                |
| Xa6Qj | All | Intentional cloxacillin overdose               |
| Xa6Qn | All | Intentional carbenicillin overdose             |
| Xa6Qr | All | Intentional flucloxacillin overdose            |
| Xa6Qx | All | Intentional cefadroxil overdose                |
| Xa6R1 | All | Intentional cefalexin overdose                 |
| Xa6R5 | All | Intentional cephalothin overdose               |
| Xa6R9 | All | Intentional cefazolin overdose                 |
| Xa6RD | All | Intentional cefradine overdose                 |
| Xa6RH | All | Intentional latamoxef overdose                 |
| Xa6RM | All | Intentional cefaclor overdose                  |
| Xa6RQ | All | Intentional cefuroxime overdose                |
| Xa6RU | All | Intentional cephamandole overdose              |
| Xa6RZ | All | Intentional cefotaxime overdose                |
| Xa6Rd | All | Intentional ceftazidime overdose               |
| Xa6Rh | All | Intentional ceftizoxime overdose               |
| Xa6Rl | All | Intentional cefixime overdose                  |
| Xa6Rp | All | Intentional cefodizime overdose                |
| Xa6Rt | All | Intentional cefpodoxime overdose               |
| Xa6Rx | All | Intentional ceftriaxone overdose               |
| Xa6SA | All | Intentional cefpirome overdose                 |
| Xa6S1 | All | Intentional ceftibuten overdose                |
| Xa6S5 | All | Intentional cefsulodin overdose                |
| Xa6SG | All | Intentional doxycycline overdose               |
| Xa6SK | All | Intentional minocycline overdose               |
| Xa6SO | All | Intentional oxytetracycline overdose           |
| Xa6SS | All | Intentional tetracycline overdose              |
| Xa6SW | All | Intentional chloramphenicol overdose           |
| Xa6Sa | All | Intentional co-trimoxazole overdose            |
| Xa6Sf | All | Intentional antimony compound overdose         |
| Xa6Sj | All | Intentional hydroxyquinoline overdose          |
| Xa6Sp | All | Intentional rifampin overdose                  |
| Xa6St | All | Intentional isoniazid overdose                 |
| Xa6Sx | All | Intentional ethambutol overdose                |
| Xa6T1 | All | Intentional antileprotic drug overdose         |
| Xa6T5 | All | Intentional pesticide product overdose         |
| Xa6TB | All | Intentional gamma globulin overdose            |
| Xa6TF | All | Intentional vaccine overdose                   |

|       |     |                                                |
|-------|-----|------------------------------------------------|
| Xa6TJ | All | Intentional antisera overdose                  |
| Xa6TO | All | Intentional glucagon overdose                  |
| Xa6TU | All | Intentional carbimazole overdose               |
| Xa6TY | All | Intentional thiouracil overdose                |
| Xa6Td | All | Intentional prednisone overdose                |
| Xa6Th | All | Intentional dexamethasone overdose             |
| Xa6Tl | All | Intentional insulin overdose                   |
| Xa6Tr | All | Intentional acetoexamide overdose              |
| Xa6Tv | All | Intentional chlorpropamide overdose            |
| Xa6Tz | All | Intentional overdose by glibenclamide          |
| Xa6U3 | All | Intentional tolbutamide overdose               |
| Xa6U8 | All | Intentional overdose by metformin              |
| Xa6UD | All | Intentional progestogen overdose               |
| Xa6UI | All | Intentional nandrolone overdose                |
| Xa6UM | All | Intentional oxymetholone overdose              |
| Xa6UQ | All | Intentional methandriol overdose               |
| Xa6UU | All | Intentional oral contraceptive overdose        |
| Xa6UZ | All | Intentional testosterone overdose              |
| Xa6Ud | All | Intentional oestrogen overdose                 |
| Xa6Ui | All | Intentional liothyronine overdose              |
| Xa6Xh | All | Intentional streptokinase overdose             |
| Xa6Xl | All | Intentional urokinase overdose                 |
| Xa6Um | All | Intentional thyroxin overdose                  |
| Xa6Uz | All | Intentional heparin overdose                   |
| Xa6V3 | All | Intentional coumarin overdose                  |
| Xa6V7 | All | Intentional warfarin sodium overdose           |
| Xa6VD | All | Intentional ferrous sulphate overdose          |
| Xa6VI | All | Intentional iodide overdose                    |
| Xa6VN | All | Intentional vitamin A overdose                 |
| Xa6VR | All | Intentional vitamin D overdose                 |
| Xa6VV | All | Intentional vitamin K overdose                 |
| Xa6Va | All | Intentional nicotinic acid derivative overdose |
| Xa6Ve | All | Intentional folic acid overdose                |
| Xa6Vi | All | Intentional potassium overdose                 |
| Xa6Vo | All | Intentional clofibrate overdose                |
| Xa6Vu | All | Intentional disopyramide overdose              |
| Xa6Vy | All | Intentional quinidine overdose                 |
| Xa6W2 | All | Intentional procainamide overdose              |
| Xa6W7 | All | Intentional bretylium overdose                 |
| Xa6WC | All | Intentional amiodarone overdose                |
| Xa6WJ | All | Intentional bendroflumethiazide overdose       |
| Xa6WN | All | Intentional chlorothiazide overdose            |
| Xa6WS | All | Intentional furosemide overdose                |
| Xa6WW | All | Intentional bumetanide overdose                |
| Xa6Wa | All | Intentional etacrynic acid overdose            |

|       |     |                                                                                                                                             |
|-------|-----|---------------------------------------------------------------------------------------------------------------------------------------------|
| Xa6We | All | Intentional potassium sparing diuretic overdose                                                                                             |
| Xa6Wi | All | Intentional osmotic diuretic overdose                                                                                                       |
| Xa6Wn | All | Intentional mersalyl overdose                                                                                                               |
| Xa6Ws | All | Intentional acetazolamide overdose                                                                                                          |
| Xa6Wy | All | Intentional guanethidine overdose                                                                                                           |
| Xa6X2 | All | Intentional overdose by angiotensin-converting-enzyme inhibitors                                                                            |
| Xa6X5 | All | Intentional antihypertensive overdose                                                                                                       |
| Xa6XA | All | Intentional digoxin overdose                                                                                                                |
| Xa6XE | All | Intentional phosphodiesterase inhibitor overdose                                                                                            |
| Xa6XJ | All | Intentional ergot alkaloid overdose                                                                                                         |
| Xa6XO | All | Intentional diazoxide overdose                                                                                                              |
| Xa6XS | All | Intentional hydralazine overdose                                                                                                            |
| Xa6XW | All | Intentional dipyridamole overdose                                                                                                           |
| Xa6Xh | All | Intentional streptokinase overdose                                                                                                          |
| Xa6Xl | All | Intentional urokinase overdose                                                                                                              |
| Xa6Tl | All | Intentional insulin overdose                                                                                                                |
| Xa6TF | All | Intentional vaccine overdose                                                                                                                |
| Xa6TO | All | Intentional glucagon overdose                                                                                                               |
| Xa6Lq | All | Intentional nicotine overdose                                                                                                               |
| Xa6TJ | All | Intentional antisera overdose                                                                                                               |
| U204. | All | [X]Overdose - SSRI                                                                                                                          |
| U2040 | All | [X]Intentional self poisoning by and exposure to psychotropic drugs, occurrence at home                                                     |
| U2041 | All | [X]Intentional self poisoning by and exposure to psychotropic drugs, occurrence in residential institution                                  |
| U2042 | All | [X]Intentional self poisoning by and exposure to psychotropic drugs, occurrence at school, other institution and public administrative area |
| U2043 | All | [X]Intentional self poisoning by and exposure to psychotropic drugs, occurrence at sports and athletics area                                |
| U2044 | All | [X]Intentional self poisoning by and exposure to psychotropic drugs, occurrence on street and highway                                       |
| U2045 | All | [X]Intentional self poisoning by and exposure to psychotropic drugs, occurrence at trade and service area                                   |
| U2046 | All | [X]Intentional self poisoning by and exposure to psychotropic drugs, occurrence at industrial and construction area                         |
| U2047 | All | [X]Intentional self poisoning by and exposure to psychotropic drugs, occurrence on farm                                                     |
| U204y | All | [X]Intentional self poisoning by and exposure to psychotropic drugs, occurrence at other specified place                                    |
| U204z | All | [X]Intentional self poisoning by and exposure to psychotropic drugs, occurrence at unspecified place                                        |
| Xa1Py | All | H/O: repeated overdose                                                                                                                      |
| U2020 | All | [X]Intentional self poisoning by and exposure to sedative hypnotics, occurrence at home                                                     |
| U2021 | All | [X]Intentional self poisoning by and exposure to sedative hypnotics, occurrence in residential institution                                  |

|       |     |                                                                                                                                             |
|-------|-----|---------------------------------------------------------------------------------------------------------------------------------------------|
| U2022 | All | [X]Intentional self poisoning by and exposure to sedative hypnotics, occurrence at school, other institution and public administrative area |
| U2023 | All | [X]Intentional self poisoning by and exposure to sedative hypnotics, occurrence at sports and athletics area                                |
| U2024 | All | [X]Intentional self poisoning by and exposure to sedative hypnotics, occurrence on street and highway                                       |
| U2025 | All | [X]Intentional self poisoning by and exposure to sedative hypnotics, occurrence at trade and service area                                   |
| U2026 | All | [X]Intentional self poisoning by and exposure to sedative hypnotics, occurrence at industrial and construction area                         |
| U2027 | All | [X]Intentional self poisoning by and exposure to sedative hypnotics, occurrence on farm                                                     |
| U202y | All | [X]Intentional self poisoning by and exposure to sedative hypnotics, occurrence at other specified place                                    |
| U202z | All | [X]Intentional self poisoning by and exposure to sedative hypnotics, occurrence at unspecified place                                        |
| Xa67B | All | Intentional 5-HT <sub>3</sub> -receptor antagonist overdose                                                                                 |
| Xa4kL | All | Intentional paracetamol poisoning                                                                                                           |
| Xa4kP | All | Intentional paracetamol and dextropropoxyphene poisoning                                                                                    |
| Xa4kV | All | Intentional aspirin poisoning                                                                                                               |
| Xa4kY | All | Intentional salicylic acid salt poisoning                                                                                                   |
| Xa4kb | All | Intentional pentazocine poisoning                                                                                                           |
| Xa4kf | All | Intentional phenazocine poisoning                                                                                                           |
| Xa4kk | All | Intentional dextromoramide poisoning                                                                                                        |
| Xa4ko | All | Intentional dextropropoxyphene poisoning                                                                                                    |
| Xa4ks | All | Intentional dipipanone poisoning                                                                                                            |
| Xa4kv | All | Intentional methadone poisoning                                                                                                             |
| Xa4l0 | All | Intentional buprenorphine poisoning                                                                                                         |
| Xa4l3 | All | Intentional poisoning by codeine                                                                                                            |
| Xa4l6 | All | Intentional heroin poisoning                                                                                                                |
| Xa4l9 | All | Intentional poisoning by dihydrocodeine                                                                                                     |
| Xa4lD | All | Intentional nalbuphine poisoning                                                                                                            |
| Xa4lG | All | Intentional morphine poisoning                                                                                                              |
| Xa4lM | All | Intentional alfentanil poisoning                                                                                                            |
| Xa4lQ | All | Intentional fentanyl poisoning                                                                                                              |
| Xa4lT | All | Intentional pethidine poisoning                                                                                                             |
| Xa4lX | All | Intentional phenoperidine poisoning                                                                                                         |
| Xa4lb | All | Intentional meptazinol poisoning                                                                                                            |
| Xa4lf | All | Intentional levorphanol poisoning                                                                                                           |
| Xa4li | All | Intentional narcotic poisoning                                                                                                              |
| Xa4lo | All | Intentional poisoning by combination analgesic                                                                                              |
| Xa4ls | All | Intentional acemetacin poisoning                                                                                                            |
| Xa4lw | All | Intentional azapropazone poisoning                                                                                                          |
| Xa4m0 | All | Intentional diclofenac poisoning                                                                                                            |
| Xa4m4 | All | Intentional etodolac poisoning                                                                                                              |
| Xa4m8 | All | Intentional felbinac poisoning                                                                                                              |

|       |     |                                                                 |
|-------|-----|-----------------------------------------------------------------|
| Xa4mC | All | Intentional fenbufen poisoning                                  |
| Xa4mG | All | Intentional fenoprofen poisoning                                |
| Xa4mK | All | Intentional flurbiprofen poisoning                              |
| Xa4mN | All | Intentional ibuprofen poisoning                                 |
| Xa4mQ | All | Intentional indometacin poisoning                               |
| Xa4mU | All | Intentional ketoprofen poisoning                                |
| Xa4mY | All | Intentional ketorolac poisoning                                 |
| Xa4mc | All | Intentional mefenamic acid poisoning                            |
| Xa4mg | All | Intentional nabumetone poisoning                                |
| Xa4mj | All | Intentional naproxen poisoning                                  |
| Xa4mn | All | Intentional nefopam poisoning                                   |
| Xa4mr | All | Intentional oxyphenbutazone poisoning                           |
| Xa4mu | All | Intentional phenylbutazone poisoning                            |
| Xa4my | All | Intentional piroxicam poisoning                                 |
| Xa4n2 | All | Intentional sulindac poisoning                                  |
| Xa4n6 | All | Intentional tenoxicam poisoning                                 |
| Xa4nA | All | Intentional tiaprofenic acid poisoning                          |
| Xa4nE | All | Intentional tolmetin poisoning                                  |
| Xa4nJ | All | Intentional radiopharmaceutical poisoning                       |
| Xa4nR | All | Intentional X-ray contrast media poisoning                      |
| Xa4nV | All | Intentional magnetic resonance imaging contrast media poisoning |
| Xa4nN | All | Intentional X-ray diagnostic contrast media poisoning           |
| Xa4nZ | All | Intentional allergen extract vaccine poisoning                  |
| Xa4nd | All | Intentional diagnostic dye poisoning                            |
| Xa53n | All | Intentional dextromethorphan poisoning                          |
| Xa53q | All | Intentional guaifenesin poisoning                               |
| Xa53t | All | Intentional terpin hydrate poisoning                            |
| Xa53w | All | Intentional poisoning by bronchodilator drug                    |
| Xa53z | All | Intentional aminophylline poisoning                             |
| Xa542 | All | Intentional theophylline poisoning                              |
| Xa545 | All | Intentional poisoning by herbal asthma mixture                  |
| Xa548 | All | Intentional anti-common cold drug poisoning                     |
| Xa54B | All | Intentional local antipruritic poisoning                        |
| Xa54E | All | Intentional local astringent and detergent poisoning            |
| Xa54H | All | Intentional hair treatment poisoning                            |
| Xa54L | All | Intentional allopurinol poisoning                               |
| Xa54O | All | Intentional colchicine poisoning                                |
| Xa54R | All | Intentional probenecid poisoning                                |
| Xa54X | All | Intentional gold salt poisoning                                 |
| Xa54a | All | Intentional antirheumatic poisoning                             |
| Xa54v | All | Intentional chelating agent poisoning                           |
| Xa54z | All | Intentional alternative medicine poisoning                      |
| Xa556 | All | Intentional flucytosine poisoning                               |
| Xa559 | All | Intentional griseofulvin poisoning                              |
| Xa55C | All | Intentional amphotericin B poisoning                            |



|       |     |                                                 |
|-------|-----|-------------------------------------------------|
| Xa55F | All | Intentional nystatin poisoning                  |
| Xa55I | All | Intentional trichomycin poisoning               |
| Xa55L | All | Intentional idoxuridine poisoning               |
| Xa55x | All | Intentional kanamycin poisoning                 |
| Xa560 | All | Intentional streptomycin poisoning              |
| Xa564 | All | Intentional gentamicin poisoning                |
| Xa568 | All | Intentional tobramycin poisoning                |
| Xa56C | All | Intentional netilmicin poisoning                |
| Xa56F | All | Intentional erythromycin poisoning              |
| Xa56J | All | Intentional azithromycin poisoning              |
| Xa56N | All | Intentional clarithromycin poisoning            |
| Xa56Q | All | Intentional oleandomycin poisoning              |
| Xa56T | All | Intentional spiramycin poisoning                |
| Xa56X | All | Intentional sodium fusidate poisoning           |
| Xa56b | All | Intentional spectinomycin poisoning             |
| Xa56f | All | Intentional vancomycin poisoning                |
| Xa56j | All | Intentional trimethoprim poisoning              |
| Xa56m | All | Intentional nitrofurantoin derivative poisoning |
| Xa56q | All | Intentional fusidic acid poisoning              |
| Xa56u | All | Intentional 4-quinolones poisoning              |
| Xa6QZ | All | Intentional 4-quinolones overdose               |
| Xa56x | All | Intentional ampicillin poisoning                |
| Xa570 | All | Intentional cloxacillin poisoning               |
| Xa573 | All | Intentional carbenicillin poisoning             |
| Xa576 | All | Intentional penicillin G poisoning              |
| Xa57A | All | Intentional flucloxacillin poisoning            |
| Xa57E | All | Intentional piperacillin poisoning              |
| Xa57J | All | Intentional cefadroxil poisoning                |
| Xa57M | All | Intentional cefalexin poisoning                 |
| Xa57P | All | Intentional cephalothin poisoning               |
| Xa57T | All | Intentional cefazolin poisoning                 |
| Xa57X | All | Intentional cefradine poisoning                 |
| Xa57b | All | Intentional latamoxef poisoning                 |
| Xa57k | All | Intentional cefuroxime poisoning                |
| Xa57g | All | Intentional cefaclor poisoning                  |
| Xa57o | All | Intentional cephmandole poisoning               |
| Xa57t | All | Intentional cefotaxime poisoning                |
| Xa57x | All | Intentional ceftazidime poisoning               |
| Xa581 | All | Intentional ceftizoxime poisoning               |
| Xa585 | All | Intentional cefixime poisoning                  |
| Xa589 | All | Intentional cefodizime poisoning                |
| Xa58D | All | Intentional cefpodoxime poisoning               |
| Xa58H | All | Intentional ceftriaxone poisoning               |
| Xa58L | All | Intentional ceftibuten poisoning                |
| Xa58P | All | Intentional cefsulodin poisoning                |



|       |     |                                                |
|-------|-----|------------------------------------------------|
| Xa58U | All | Intentional ceftiofime poisoning               |
| Xa58X | All | Intentional cephaloridine poisoning            |
| Xa58a | All | Intentional sulfadiazine poisoning             |
| Xa58d | All | Intentional sulphafurazole poisoning           |
| Xa58g | All | Intentional sulfamethoxazole poisoning         |
| Xa58j | All | Intentional doxycycline poisoning              |
| Xa58m | All | Intentional minocycline poisoning              |
| Xa58p | All | Intentional oxytetracycline poisoning          |
| Xa58s | All | Intentional tetracycline poisoning             |
| Xa58v | All | Intentional chloramphenicol poisoning          |
| Xa58z | All | Intentional co-trimoxazole poisoning           |
| Xa59F | All | Intentional hydroxyquinoline poisoning         |
| Xa59I | All | Intentional diiodohydroxyquinoline poisoning   |
| Xa59L | All | Intentional rifampin poisoning                 |
| Xa59O | All | Intentional isoniazid poisoning                |
| Xa59R | All | Intentional ethambutol poisoning               |
| Xa59U | All | Intentional cycloserine poisoning              |
| Xa59Y | All | Intentional antileprotic drug poisoning        |
| Xa59b | All | Intentional ethionamide poisoning              |
| Xa59e | All | Intentional para-aminosalicylic acid poisoning |
| Xa59h | All | Intentional sulphone poisoning                 |
| Xa59l | All | Intentional pesticide product poisoning        |

**Supplementary table S2.10.** Read codes used to identify non-medication based treatments for depression or anxiety.

| <b>Counselling</b>    |                |                                            |
|-----------------------|----------------|--------------------------------------------|
| <b>Read V2 Code</b>   | <b>Term ID</b> | <b>Description</b>                         |
| 67...                 | 11             | Counselling/health education               |
| 671..                 | All            | Counselling - general                      |
| 6712.                 | All            | Counselling offered                        |
| 6714.                 | All            | Counselling carried out                    |
| 6715.                 | All            | Counselling by other agency                |
| 6716.                 | All            | Counselling of benefit                     |
| 6717.                 | All            | Counselling of no benefit                  |
| 671Z.                 | All            | Counselling - general NOS                  |
| 672..                 | All            | Person counselled                          |
| 6721.                 | All            | Patient counselled                         |
| 6722.                 | All            | Family counselled                          |
| 673..                 | All            | Person counselled by                       |
| 6731.                 | All            | Counselled by a doctor                     |
| 6732.                 | All            | Counselled by a nurse                      |
| 6733.                 | All            | Counselled by a health visitor             |
| 6735.                 | All            | Counselled by a social worker              |
| 6736.                 | All            | Counselled by a counsellor                 |
| 6737.                 | All            | Counselled by a vol. worker                |
| 673Z.                 | All            | Counselled by person NOS                   |
| 8M8..                 | All            | Counselling requested                      |
| 9NJ1.                 | All            | In-house counselling                       |
| 9NJR.                 | All            | In-house counselling first appointment     |
| 9NJT.                 | All            | In-house counselling follow-up appointment |
| <b>Read CTV3 Code</b> | <b>Term ID</b> | <b>Description</b>                         |
| X71Ec                 | All            | Counselling                                |
| X71Ep                 | All            | Coping strategy counselling                |
| XaEC1                 | All            | Phobia counselling                         |
| XaD27                 | All            | Family counselling                         |
| 6779.                 | All            | Psychological counselling                  |
| XaECG                 | All            | Anxiety counselling                        |
| XaECF                 | All            | Self-esteem counselling                    |
| XaI8j                 | All            | Stress counselling                         |
| 672..                 | All            | Person counselled                          |
| 6721.                 | All            | Patient counselled                         |
| 6722.                 | All            | Family counselled                          |
| XE1TI                 | All            | Person counselled by                       |
| 6715.                 | All            | Counselling by other agency                |
| 6731.                 | All            | Counselled by a doctor                     |

|                                      |                |                                                         |
|--------------------------------------|----------------|---------------------------------------------------------|
| 6732.                                | All            | Counselled by a nurse                                   |
| 6733.                                | All            | Counselled by a health visitor                          |
| 6735.                                | All            | Counselled by a social worker                           |
| 6736.                                | All            | Counselled by a counsellor                              |
| 6737.                                | All            | Counselled by voluntary worker                          |
| 673Z.                                | All            | Counselled by person NOS                                |
| Xa07L                                | All            | Counselled by member of primary health care team        |
| 9N2B.                                | All            | Seen by counsellor                                      |
| XaAS4                                | All            | Seen by mental health counsellor                        |
| XaBT1                                | All            | Refer to counsellor                                     |
| XaAfj                                | All            | Referral to mental health counsellor                    |
| 9NJ1.                                | All            | In-house counselling                                    |
| XaLnp                                | All            | In-house counselling first appointment                  |
| XaLnr                                | All            | In-house counselling follow-up appointment              |
| 671..                                | All            | Counselling - general                                   |
| 6712.                                | All            | Counselling offered                                     |
| 6714.                                | All            | Counselling carried out                                 |
| 6716.                                | All            | Counselling of benefit                                  |
| 6717.                                | All            | Counselling of no benefit                               |
| 671Z.                                | All            | Counselling - general NOS                               |
| XaAOd                                | All            | Under care of counsellor                                |
| XaAOh                                | All            | Under care of mental health counsellor                  |
| <b>Cognitive Behavioural Therapy</b> |                |                                                         |
| <b>Read V2 Code</b>                  | <b>Term ID</b> | <b>Description</b>                                      |
| 8G13.                                | All            | Cognitive-behaviour therapy                             |
| 8G130                                | All            | Cognitive behavioural therapy parenting programme       |
| 8G131                                | All            | CBTp - cognitive behavioural therapy for psychosis      |
| 7L1a.                                | All            | Cognitive behavioural therapy                           |
| 7L1a0                                | All            | Cognitive behavioural therapy by unidisciplinary team   |
| 7L1a1                                | All            | Cognitive behavioural therapy by multidisciplinary team |
| 7L1ay                                | All            | Other specified cognitive behavioural therapy           |
| 7L1az                                | All            | Cognitive behavioural therapy NOS                       |
| 8G510                                | All            | Group cognitive behavioural therapy                     |
| 8G15.                                | All            | Computerised cognitive behavioural therapy              |
| 8HLK.                                | All            | Referral for cognitive behavioural therapy              |
| <b>Read CTV3 Code</b>                | <b>Term ID</b> | <b>Description</b>                                      |
| Ub0qp                                | All            | Cognitive and behavioural therapy                       |
| XaABO                                | All            | Cognitive - behaviour therapy                           |
| Xad6j                                | All            | Cognitive behavioural therapy for psychosis             |
| Xaaa6                                | All            | Cognitive behavioural therapy parenting programme       |
| XaQC0                                | All            | Guided self help cognitive behavioural therapy          |
| XaKzQ                                | All            | Computerised cognitive behavioural therapy              |
| Xa8I9                                | All            | Generic cognitive behavioural therapy                   |

|                       |                |                                                                   |
|-----------------------|----------------|-------------------------------------------------------------------|
| XaM2I                 | All            | Cognitive behavioural therapy by unidisciplinary team             |
| XaM2J                 | All            | Cognitive behavioural therapy by multidisciplinary team           |
| XaM2K                 | All            | Other specified cognitive behavioural therapy                     |
| XaM2L                 | All            | Cognitive behavioural therapy NOS                                 |
| XaR2j                 | All            | Referral to cognitive behavioural therapist                       |
| XaR5D                 | All            | Referral for cognitive behavioural therapy                        |
| XaYgB                 | All            | Referral for high intensity cognitive behavioural therapy         |
| <b>Psychotherapy</b>  |                |                                                                   |
| <b>Read V2 Code</b>   | <b>Term ID</b> | <b>Description</b>                                                |
| 8G...                 | All            | Psychotherapy                                                     |
| 8G1..                 | All            | General psychotherapy                                             |
| 8G10.                 | All            | Psychotherapy - behavioural                                       |
| 8G100                 | All            | Behavioural activation therapy                                    |
| 8G101                 | All            | Dialectical behaviour therapy                                     |
| 8G102                 | All            | Behavioural parent training                                       |
| 8G11.                 | All            | Psychotherapy - cognitive                                         |
| 8G12.                 | All            | Psychotherapy - psychodynamic                                     |
| 8G120                 | All            | Short-term psychodynamic therapy                                  |
| 8G121                 | All            | Dynamic interpersonal therapy                                     |
| 8G122                 | All            | Focal psychodynamic therapy                                       |
| 8G14.                 | All            | Cognitive analytic therapy                                        |
| 8G15.                 | All            | Computerised cognitive behavioural therapy                        |
| 8G16.                 | All            | Interpersonal psychotherapy                                       |
| 8G18.                 | All            | Cognitive stimulation therapy                                     |
| 9NIK.                 | All            | Seen by psychotherapist                                           |
| 9NIK0                 | All            | Seen by trainee psychotherapist                                   |
| 8HHT.                 | All            | Referral to psychotherapist                                       |
| ZV57D                 | All            | [V]Psychotherapy, not elsewhere classified                        |
| ZV673                 | All            | [V]Psychotherapy or other treatment for mental disorder follow-up |
| 8G9Z.                 | All            | Other psychotherapy NOS                                           |
| 8G9..                 | All            | Other psychotherapy                                               |
| <b>Read CTV3 Code</b> | <b>Term ID</b> | <b>Description</b>                                                |
| X71bp                 | All            | Psychotherapy                                                     |
| XaaUO                 | All            | Cognitive rehabilitation therapy                                  |
| XaItc                 | All            | Brief solution focused psychotherapy                              |
| Xa8IG                 | All            | Psychoanalytic and psychodynamic therapy                          |
| Xa8IJ                 | All            | Long-term exploratory psychotherapy                               |
| 3841.                 | All            | Psychoanalysis                                                    |
| XaA8V                 | All            | Generic psychoanalysis                                            |
| XaA8W                 | All            | Independent psychoanalysis                                        |
| XaA8T                 | All            | Kleinian psychoanalysis                                           |
| XaA8U                 | All            | Bion-based group psychoanalysis                                   |
| XaA8X                 | All            | Classical psychoanalysis                                          |

|       |     |                                                   |
|-------|-----|---------------------------------------------------|
| XaA8Y | All | Lacanian psychoanalysis                           |
| XaA8g | All | Group psychoanalysis                              |
| XaA8U | All | Bion-based group psychoanalysis                   |
| 384Z. | All | Psychological analysis NOS                        |
| Xa8IM | All | Jungian-based therapy                             |
| Xa8IN | All | Generic Jungian-based therapy                     |
| Xa8IP | All | Analytical psychology                             |
| Xa8IR | All | Long-term psychodynamic psychotherapy             |
| XaA8Z | All | Developmental psychodynamic psychotherapy         |
| XaA8c | All | Supportive expressive psychodynamic psychotherapy |
| XaA8d | All | Psychodynamic-interpersonal psychotherapy         |
| XaEVq | All | Psychodynamic psychotherapy                       |
| Xad7C | All | Focal psychodynamic therapy                       |
| Xa8IR | All | Long-term psychodynamic psychotherapy             |
| XaA8Z | All | Developmental psychodynamic psychotherapy         |
| XaA8c | All | Supportive expressive psychodynamic psychotherapy |
| XaA8d | All | Psychodynamic-interpersonal psychotherapy         |
| Xa8II | All | Short-term psychodynamic therapy                  |
| XaXuc | All | Dynamic interpersonal therapy                     |
| XaA9g | All | Specific task orientated psychotherapy            |
| XE0iL | All | Psychotherapy/sociotherapy                        |
| 8G9Z. | All | Other psychotherapy NOS                           |
| 8G9.. | All | Other psychotherapy                               |

## Codes used to identify time off work and unemployment

**Supplementary table S3.1.** Read codes used to identify unemployment.

| Unemployment   |         |                                                                       |
|----------------|---------|-----------------------------------------------------------------------|
| Read V2 Code   | Term ID | Description                                                           |
| 13J7.          | All     | Unemployed                                                            |
| 13J70          | All     | Recently unemployed                                                   |
| 13J71          | All     | Chronic unemployment                                                  |
| ZV620          | All     | [V]Unemployment                                                       |
| 13R..          | All     | Unemployment benefits                                                 |
| 13R1.          | All     | Unemployment benefits                                                 |
| 13R2.          | All     | Redundancy payment                                                    |
| 13RZ.          | All     | Unemployment benefit NOS                                              |
| 13JX.          | All     | Time off work                                                         |
| 13JG.          | All     | Voluntarily redundant                                                 |
| 13J3.          | All     | Loss of job                                                           |
| 13J30          | All     | Sacked from work                                                      |
| 13J8.          | All     | Redundant                                                             |
| 13JJ.          | All     | Unfit for work                                                        |
| 13JJ0          | All     | Benefit agency reports unfit for work                                 |
| 13JJ1          | All     | Benefit agency reports unfit for work but fit note no longer required |
| 13Jk.          | All     | Not in employment, education or training                              |
| 9DG4.          | All     | IB 113 DLS incapacity for work form paid                              |
| 9DG2.          | All     | IB 113 DLS incapacity for work form sent                              |
| 9DG3.          | All     | IB 113 DLS incapacity for work form received                          |
| 9DG1.          | All     | IB 113 DLS incapacity for work form completed                         |
| 9DQ3.          | All     | ESA113 form paid                                                      |
| 9DQ1.          | All     | ESA113 form sent                                                      |
| 9DQ2.          | All     | ESA113 form received                                                  |
| 9DQ0.          | All     | ESA113 form completed                                                 |
| 130D.          | All     | Employment and support allowance                                      |
| Read CTV3 Code | Term ID | Description                                                           |
| 13J7.          | All     | Unemployed                                                            |
| 13J70          | All     | Recently unemployed                                                   |
| 13J71          | All     | Chronic unemployment                                                  |
| ZV620          | All     | [V]Unemployment                                                       |
| XaPhf          | All     | Benefit agency reports unfit for work                                 |
| Xabd4          | All     | Benefit agency reports unfit for work but fit note no longer required |
| 13J8.          | All     | Redundant                                                             |
| 13JG.          | All     | Voluntarily redundant                                                 |

|       |     |                                               |
|-------|-----|-----------------------------------------------|
| Ua2BD | All | Unfit to return to work                       |
| Ua2BE | All | Physically unfit for work                     |
| U12BF | All | Mentally unfit for work                       |
| 13JX. | All | Time off work                                 |
| XaZHu | All | ESA113 form paid                              |
| XaZHt | All | ESA113 form sent                              |
| XaZHs | All | ESA113 form received                          |
| XaZHj | All | ESA113 form completed                         |
| XaBhC | All | Employment and support allowance              |
| XacJr | All | Not in employment, education or training      |
| XE0pT | All | Loss of job                                   |
| Ua0V9 | All | Dismissed from job                            |
| Ua0VA | All | Unfair dismissal from job                     |
| XaCIW | All | IB 113 DLS incapacity for work form paid      |
| XaCIU | All | IB 113 DLS incapacity for work form sent      |
| XaCIV | All | IB 113 DLS incapacity for work form received  |
| XaCIT | All | IB 113 DLS incapacity for work form completed |
| 13JJ. | All | Unfit for work                                |
| 13J6. | All | Medically retired                             |



**Supplementary table S3.2.** Read codes used to identify time off work via the issuing of Med 3 (“fit notes”) certificates.

| <b>Unemployment</b>   |                |                                                      |
|-----------------------|----------------|------------------------------------------------------|
| <b>Read V2 Code</b>   | <b>Term ID</b> | <b>Description</b>                                   |
| 9D1..                 | All            | MED3 - doctor's statement                            |
| 9D11.                 | All            | MED3 issued to patient                               |
| 9D12.                 | All            | MED3 duplicate issued                                |
| 9D15.                 | All            | eMED3 (2010) new statement issued, not fit for work  |
| 9D17.                 | All            | eMED3 (2010) duplicate issued, not fit for work      |
| 9D19.                 | All            | MED3 (2010) issued by hand, not fit for work         |
| 9D1C.                 | All            | MED3 (2010) issued to patient                        |
| 9D1D.                 | All            | MED3 (2010) duplicate issued                         |
| 9D1E.                 | All            | MED3 (2010) issued - recommend phased return to work |
| 9D1F.                 | All            | MED3 (2010) issued - recommend altered hours         |
| 9D1G.                 | All            | MED3 (2010) issued - recommend amended duties        |
| 9D1Z.                 | All            | MED3 - NOS                                           |
| <b>Read CTV3 Code</b> | <b>Term ID</b> | <b>Description</b>                                   |
| XaBHd                 | All            | MED3 status                                          |
| XaXf2                 | All            | MED3 (2010) duplicate issued                         |
| XaXf1                 | All            | MED3 (2010) issued to patient                        |
| XaXf5                 | All            | MED3 (2010) issued - recommend amended duties        |
| XaXf4                 | All            | MED3 (2010) issued - recommend altered hours         |
| XaXf3                 | All            | MED3 (2010) issued - recommend phased return to work |
| 9D11.                 | All            | MED3 issued to patient                               |
| XaX1R                 | All            | MED3 (2010) issued by hand, not fit for work         |
| XaX1L                 | All            | eMED3 (2010) duplicate issued, not fit for work      |
| XaX1E                 | All            | eMED3 (2010) new statement issued, not fit for work  |
| 9D12.                 | All            | MED3 duplicate issued                                |
| 9D1Z.                 | All            | MED3 - NOS                                           |

## Definitions of atopic and autoimmune conditions with Read code lists.

**Supplementary table S4.1.** The case definitions for included atopic and autoimmune conditions.

| Condition                          | Definition                                                                                                                                                                                                                                |
|------------------------------------|-------------------------------------------------------------------------------------------------------------------------------------------------------------------------------------------------------------------------------------------|
| <b>Atopic conditions</b>           |                                                                                                                                                                                                                                           |
| Atopic dermatitis                  | Defined using the validated algorithm by Abuabara et al. (2017)(1)                                                                                                                                                                        |
| Allergic rhinitis                  | A diagnosis code for allergic rhinitis (Supplementary table S4.2)                                                                                                                                                                         |
| Asthma                             | Defined using the RCGP RSC asthma algorithm(2)                                                                                                                                                                                            |
| <b>Gastrointestinal conditions</b> |                                                                                                                                                                                                                                           |
| Crohn's disease                    | A diagnosis code for Crohn's and no conflicting code for ulcerative colitis (where conflicted codes occur the most recent diagnosis code is used to define the condition) (Supplementary table S4.3)                                      |
| Ulcerative colitis                 | A diagnosis code for ulcerative colitis and no conflicting code for Crohn's disease (where conflicted codes occur the most recent diagnosis code is used to define the condition) (Supplementary table S4.4)                              |
| Coeliac disease                    | A diagnosis code for Coeliac disease (Supplementary table S4.5)                                                                                                                                                                           |
| Pernicious anaemia                 | A diagnosis code for pernicious anaemia (Supplementary table S4.6)                                                                                                                                                                        |
| <b>Endocrine conditions</b>        |                                                                                                                                                                                                                                           |
| Type 1 diabetes                    | Defined using the RCGP RSC diabetes type algorithm(3)                                                                                                                                                                                     |
| Hashimoto's thyroiditis            | Either: <ul style="list-style-type: none"> <li>• A code for Hashimoto's thyroiditis (Supplementary table S4.7)</li> <li>OR</li> <li>• A code for "non-specific hypothyroidism" AND no code for "non-autoimmune hypothyroidism"</li> </ul> |
| Grave's disease                    | A diagnosis code for Grave's disease (Supplementary table S4.8)                                                                                                                                                                           |
| <b>Rheumatological conditions</b>  |                                                                                                                                                                                                                                           |
| Rheumatoid arthritis               | Defined using the validated algorithm by Muller et al. (2015)(4)                                                                                                                                                                          |
| Psoriatic arthritis                | A diagnosis code for psoriatic arthritis (Supplementary table S4.9)                                                                                                                                                                       |
| Ankylosing spondylitis             | A diagnosis code for ankylosing spondylitis (Supplementary table S4.10)                                                                                                                                                                   |
| Systemic lupus erythematosus       | A diagnosis code for systemic lupus erythematosus (Supplementary table S4.11)                                                                                                                                                             |
| Polymyalgia rheumatica             | A diagnosis code for polymyalgia rheumatica (Supplementary table S4.12)                                                                                                                                                                   |
| Sjögren's syndrome                 | A diagnosis code for Sjögren's syndrome (Supplementary table S4.13)                                                                                                                                                                       |
| <b>Dermatological conditions</b>   |                                                                                                                                                                                                                                           |
| Psoriasis                          | A diagnosis code for psoriasis (Supplementary table S4.14)                                                                                                                                                                                |
| Vitiligo                           | A diagnosis code for vitiligo (Supplementary table S4.15)                                                                                                                                                                                 |

1  
2  
3  
4  
5  
6  
7  
8  
9  
10  
11  
12  
13  
14  
15  
16  
17  
18  
19  
20  
21  
22  
23  
24  
25  
26  
27  
28  
29  
30  
31  
32  
33  
34  
35  
36  
37  
38  
39  
40  
41  
42  
43  
44  
45  
46  
47  
48  
49  
50  
51  
52  
53  
54  
55  
56  
57  
58  
59  
60

| <b>Neurological conditions</b> |                                                                     |
|--------------------------------|---------------------------------------------------------------------|
| Multiple sclerosis             | A diagnosis code for multiple sclerosis (Supplementary table S4.16) |

For peer review only

**Supplementary table S4.2.** Read codes used to identify allergic rhinitis.

| <b>Allergic rhinitis</b> |                |                                                     |
|--------------------------|----------------|-----------------------------------------------------|
| <b>Read V2 Code</b>      | <b>Term ID</b> | <b>Description</b>                                  |
| H17..                    | All            | Allergic rhinitis                                   |
| H170.                    | All            | Allergic rhinitis due to pollens                    |
| H171.                    | All            | Allergic rhinitis due to other allergens            |
| H1710                    | All            | Allergy to animal                                   |
| H1711                    | All            | Dog allergy                                         |
| H172.                    | All            | Allergic rhinitis due to unspecified allergen       |
| H17z.                    | All            | Allergic rhinitis NOS                               |
| 14B1.                    | All            | H/O: hay fever                                      |
| H3300                    | All            | Hay fever with asthma                               |
| <b>Read CTV3 Code</b>    | <b>Term ID</b> | <b>Description</b>                                  |
| XE0Y5                    | All            | Allergic rhinitis                                   |
| Xa0IX                    | All            | Seasonal allergic rhinitis                          |
| XE2QI                    | All            | Allergic rhinitis due to pollens                    |
| Hyu20                    | All            | [X]Other seasonal allergic rhinitis                 |
| X00I8                    | All            | Hay fever - other allergen                          |
| X00I9                    | All            | Hay fever - unspecified allergen                    |
| X1020                    | All            | Hay fever with asthma                               |
| X00IA                    | All            | Perennial allergic rhinitis                         |
| X00IB                    | All            | Perennial allergic rhinitis with seasonal variation |
| H17z.                    | All            | Allergic rhinitis NOS                               |
| Hyu21                    | All            | [X]Other allergic rhinitis                          |
| XE0Y6                    | All            | Allergic rhinitis due to other allergens            |
| XE0Y7                    | All            | Allergic rhinitis due to unspecified allergen       |
| 14B1.                    | All            | H/O: hay fever                                      |

**Supplementary table S4.3. Read codes used to Crohn's disease.**

| <b>Crohn's disease</b> |                |                                                    |
|------------------------|----------------|----------------------------------------------------|
| <b>Read V2 Code</b>    | <b>Term ID</b> | <b>Description</b>                                 |
| J40..                  | All            | Regional enteritis- Crohn's disease                |
| J400.                  | All            | Regional enteritis of the small bowel              |
| J4000                  | All            | Regional enteritis of the duodenum                 |
| J4001                  | All            | Regional enteritis of the jejunum                  |
| J4002                  | All            | Crohn's disease of the terminal ileum              |
| J4003                  | All            | Crohn's disease of the ileum unspecified           |
| J4004                  | All            | Crohn's disease of the ileum NOS                   |
| J4005                  | All            | Exacerbation of Crohn's disease of small intestine |
| J400z                  | All            | Crohn's disease of the small bowel NOS             |
| J40..                  | All            | Crohn's disease                                    |
| J4010                  | All            | Regional enteritis of the colon                    |
| J4011                  | All            | Regional enteritis of the rectum                   |
| J4012                  | All            | Exacerbation of Crohn's disease of large intestine |
| J401z                  | All            | Crohn's disease of the large bowel NOS             |
| J40z.                  | All            | Crohn's disease NOS                                |
| <b>Read CTV3 Code</b>  | <b>Term ID</b> | <b>Description</b>                                 |
| XE2QL                  | All            | Crohn's disease                                    |
| Xa0lh                  | All            | Regional enteritis                                 |
| X302r                  | All            | Crohn's jejunitis                                  |
| X302t                  | All            | Crohn's ileitis                                    |
| J4003                  | All            | Crohn's disease of the ileum unspecified           |
| J4004                  | All            | Crohn's disease of the ileum NOS                   |
| J4002                  | All            | Crohn's disease of terminal ileum                  |
| J400.                  | All            | Regional enteritis of small bowel                  |
| XaK6C                  | All            | Exacerbation of Crohn's disease of small intestine |
| J400z                  | All            | Crohn's disease of the small bowel NOS             |
| J401.                  | All            | Regional enteritis of the large bowel              |
| XE0af                  | All            | Crohn's disease of the large bowel NOS             |
| XaK6D                  | All            | Exacerbation of Crohn's disease of large intestine |
| J40z.                  | All            | Regional enteritis NOS                             |
| J4010                  | All            | Crohn's colitis                                    |
| J4011                  | All            | Crohn's proctitis                                  |
| X3050                  | All            | Perianal Crohn's disease                           |
| Jyu40                  | All            | [X]Other Crohn's disease                           |
| J4001                  | Y30Fy          | Regional enteritis of the jejunum                  |

**Supplementary table S4.4.** Read codes used to identify Ulcerative colitis.

| <b>Ulcerative colitis</b> |                |                                          |
|---------------------------|----------------|------------------------------------------|
| <b>Read V2 Code</b>       | <b>Term ID</b> | <b>Description</b>                       |
| J41..                     | All            | Ulcerative colitis and/or proctitis      |
| J410.                     | All            | Ulcerative proctocolitis                 |
| J4100                     | All            | Ulcerative ileocolitis                   |
| J4101                     | All            | Ulcerative colitis                       |
| J4102                     | All            | Ulcerative rectosigmoiditis              |
| J4103                     | All            | Ulcerative proctitis                     |
| J4104                     | All            | Exacerbation of ulcerative colitis       |
| J410z                     | All            | Ulcerative proctocolitis NOS             |
| J411.                     | All            | Ulcerative (chronic) enterocolitis       |
| J412.                     | All            | Ulcerative (chronic) ileocolitis         |
| J413.                     | All            | Ulcerative pancolitis                    |
| N0454                     | All            | Juvenile arthritis in ulcerative colitis |
| N0310                     | All            | Arthropathy in ulcerative colitis        |
| <b>Read CTV3 Code</b>     | <b>Term ID</b> | <b>Description</b>                       |
| XE0ag                     | All            | Ulcerative colitis                       |
| XaZ2j                     | All            | Left sided ulcerative colitis            |
| XaYzX                     | All            | Ulcerative pancolitis                    |
| XaK6E                     | All            | Exacerbation of ulcerative colitis       |
| J410.                     | All            | Ulcerative proctocolitis                 |
| J4100                     | All            | Ulcerative ileocolitis                   |
| J410z                     | All            | Ulcerative proctocolitis NOS             |
| Jyu41                     | All            | [X]Other ulcerative colitis              |
| J4103                     | Y30D7          | Ulcerative proctitis                     |

**Supplementary table S4.5.** Read codes used to identify Coeliac disease.

| <b>Coeliac disease</b>    |                |                                               |
|---------------------------|----------------|-----------------------------------------------|
| <b>Read V2 Code</b>       | <b>Term ID</b> | <b>Description</b>                            |
| J690.                     | All            | Coeliac disease                               |
| J6900                     | All            | Congenital coeliac disease                    |
| J6901                     | All            | Acquired coeliac disease                      |
| J690z                     | All            | Coeliac disease NOS                           |
| 6648.                     | All            | Coeliac disease monitoring                    |
| 66480                     | All            | Coeliac disease annual review                 |
| 68W4.                     | All            | Coeliac disease autoantibody profile positive |
| <b>Read CTV3 Code</b>     | <b>Term ID</b> | <b>Description</b>                            |
| XE0bL                     | All            | Childhood coeliac disease                     |
| X3037                     | All            | Adult coeliac disease                         |
| J6901                     | All            | Acquired coeliac disease                      |
| J690z                     | All            | Coeliac disease NOS                           |
| XE0bK                     | All            | Coeliac disease                               |
| XaQIX                     | All            | Coeliac disease autoantibody profile positive |
| XaXGl                     | All            | Coeliac disease monitoring                    |
| J6900                     | All            | Congenital coeliac disease                    |
| <b>Pernicious anaemia</b> |                |                                               |
| <b>Read V2 Code</b>       | <b>Term ID</b> | <b>Description</b>                            |
| D010.                     | All            | Pernicious anaemia                            |
| F3815                     | All            | Myasthenic syndrome due to pernicious anaemia |
| <b>Read CTV3 Code</b>     | <b>Term ID</b> | <b>Description</b>                            |
| XE2ro                     | All            | Pernicious anaemia                            |
| X20CE                     | All            | Selective malabsorption of cyanocobalamin     |
| X20CC                     | All            | Congenital deficiency of intrinsic factor     |
| X20CD                     | All            | Biermer's congenital pernicious anaemia       |
| F3815                     | All            | Myasthenic syndrome due to pernicious anaemia |



**Supplementary table S4.6.** Read codes used to identify pernicious anaemia.

| <b>Pernicious anaemia</b> |                |                                               |
|---------------------------|----------------|-----------------------------------------------|
| <b>Read V2 Code</b>       | <b>Term ID</b> | <b>Description</b>                            |
| D010.                     | All            | Pernicious anaemia                            |
| F3815                     | All            | Myasthenic syndrome due to pernicious anaemia |
| <b>Read CTV3 Code</b>     | <b>Term ID</b> | <b>Description</b>                            |
| XE2ro                     | All            | Pernicious anaemia                            |
| X20CE                     | All            | Selective malabsorption of cyanocobalamin     |
| X20CC                     | All            | Congenital deficiency of intrinsic factor     |
| X20CD                     | All            | Biermer's congenital pernicious anaemia       |
| F3815                     | All            | Myasthenic syndrome due to pernicious anaemia |

**Supplementary table S4.7.** Read codes used to identify Hashimoto's thyroiditis.

This will be defined as either a code for Hashimoto's thyroiditis or a non-specific code for hypothyroidism and no codes for any non-autoimmune hypothyroidism.

| <b>Hashimoto's thyroiditis</b>     |                |                                                      |
|------------------------------------|----------------|------------------------------------------------------|
| <b>Read V2 Code</b>                | <b>Term ID</b> | <b>Description</b>                                   |
| C052.                              | All            | Hashimoto's disease                                  |
| C05y4                              | All            | Chronic thyroiditis with transient thyrotoxicosis    |
| C046.                              | All            | Autoimmune myxoedema                                 |
| L1815                              | All            | Postpartum thyroiditis                               |
| <b>Read CTV3 Code</b>              | <b>Term ID</b> | <b>Description</b>                                   |
| X40G1                              | All            | Thyrotoxicosis due to Hashimoto's thyroiditis        |
| X40Gm                              | All            | Hashitoxicosis - transient                           |
| X40Ha                              | All            | Struma lymphomatosis                                 |
| X40HE                              | All            | Autoimmune hypothyroidism                            |
| X40HF                              | All            | Hypothyroidism due to Hashimoto's thyroiditis        |
| X40HG                              | All            | Hypothyroidism due to TSH receptor blocking antibody |
| X40HW                              | All            | Hashimoto's disease                                  |
| X40HY                              | All            | Lymphadenoid goitre                                  |
| X40HZ                              | All            | Lymphocytic thyroiditis - autoimmune                 |
| XE10C                              | All            | Autoimmune thyroiditis                               |
| X40HW                              | All            | Hashimoto's thyroiditis                              |
| X40Gm                              | All            | Hashitoxicosis - transient                           |
| X40HY                              | All            | Lymphadenoid goitre                                  |
| X40HZ                              | All            | Lymphocytic thyroiditis - autoimmune                 |
| X40Ha                              | All            | Struma lymphomatosis                                 |
| X40Dj                              | All            | Postpartum thyroiditis                               |
| <b>Non-specific hypothyroidism</b> |                |                                                      |
| <b>Read V2 Code</b>                | <b>Term ID</b> | <b>Description</b>                                   |
| C04..                              | All            | Acquired hypothyroidism                              |
| C045.                              | All            | Acquired atrophy of thyroid                          |
| C046.                              | All            | Autoimmune myxoedema                                 |
| C04y.                              | All            | Other acquired hypothyroidism                        |
| C04z.                              | All            | Hypothyroidism NOS                                   |
| C04z0                              | All            | Premature puberty due to hypothyroidism              |
| C04z1                              | All            | Myxoedema coma                                       |
| C05y.                              | All            | Other and unspecified chronic thyroiditis            |
| F3953                              | All            | Myopathy due to myxoedema                            |
| F1441                              | All            | Cerebellar ataxia due to myxoedema                   |
| F11x5                              | All            | Cerebral degeneration due to myxoedema               |
| 1432                               | All            | H/O: hypothyroidism                                  |
| 66BB.                              | All            | Hypothyroidism annual review                         |

|                                      |                |                                                           |
|--------------------------------------|----------------|-----------------------------------------------------------|
| 90j..                                | All            | Hypothyroidism monitoring administration                  |
| 90j0.                                | All            | Hypothyroidism monitoring first letter                    |
| 90j1.                                | All            | Hypothyroidism monitoring second letter                   |
| 90j2.                                | All            | Hypothyroidism monitoring third letter                    |
| 90j3.                                | All            | Hypothyroidism monitoring verbal invite                   |
| 90j4.                                | All            | Hypothyroidism monitoring telephone invitation            |
| F3814                                | All            | Myasthenic syndrome due to hypothyroidism                 |
| 90j4.                                | All            | Hypothyroidism monitoring telephone invitation            |
| <b>Read CTV3 Code</b>                | <b>Term ID</b> | <b>Description</b>                                        |
| X40IQ                                | All            | Hypothyroid                                               |
| XE108                                | All            | Acquired hypothyroidism                                   |
| X40HI                                | All            | Compensated hypothyroidism                                |
| X005I                                | All            | Myxoedema coma                                            |
| C04y.                                | All            | Other acquired hypothyroidism                             |
| X40HD                                | All            | Hypothyroid goitre, acquired                              |
| XE10A                                | All            | Hypothyroidism NOS                                        |
| Xa3ed                                | All            | Acquired hypothyroidism NOS                               |
| XaLUg                                | All            | Hypothyroidism review                                     |
| XaOjl                                | All            | Hypothyroidism annual review                              |
| X40HD                                | All            | Hypothyroid goitre, acquired                              |
| XaJul                                | All            | Hypothyroidism monitoring invitation                      |
| XaMFm                                | All            | Hypothyroidism monitoring telephone invitation            |
| XaKbz                                | All            | Hypothyroidism monitoring verbal invite                   |
| XaJuO                                | All            | Hypothyroidism monitoring third letter                    |
| XaJuN                                | All            | Hypothyroidism monitoring second letter                   |
| XaJuM                                | All            | Hypothyroidism monitoring first letter                    |
| C06y1                                | All            | Thyroid atrophy                                           |
| X40I1                                | All            | Atrophy of thyroid - acquired                             |
| F3953                                | All            | Myxoedema myopathy                                        |
| F11x5                                | All            | Myxoedema encephalopathy                                  |
| F1441                                | All            | Myxoedema cerebellar degeneration                         |
| PK251                                | All            | Aplasia of thyroid with myxoedema                         |
| X00Ao                                | All            | Myxoedema neuropathy                                      |
| 1432.                                | All            | H/O: hypothyroidism                                       |
| C04z0                                | All            | Premature puberty due to hypothyroidism                   |
| C05y.                                | All            | Other and unspecified chronic thyroiditis                 |
| <b>Non-autoimmune hypothyroidism</b> |                |                                                           |
| <b>Read V2 Code</b>                  | <b>Term ID</b> | <b>Description</b>                                        |
| C0A..                                | All            | Congenital iodine deficiency syndrome                     |
| C0A0.                                | All            | Congenital iodine-deficiency syndrome, neurological type  |
| C0A1.                                | All            | Congenital iodine-deficiency syndrome, myxoedematous type |
| C0A2.                                | All            | Congenital iodine-deficiency syndrome, mixed type         |
| C0A3.                                | All            | Iodine-deficiency-related diffuse (endemic) goitre        |

|                       |                |                                                            |
|-----------------------|----------------|------------------------------------------------------------|
| C0A4.                 | All            | Iodine-deficiency-related multinodular (endemic) goitre    |
| C0A5.                 | All            | Subclinical iodine-deficiency hypothyroidism               |
| C0AX.                 | All            | Iodine-deficiency-related (endemic) goitre, unspecified    |
| C03..                 | All            | Congenital hypothyroidism                                  |
| C030.                 | All            | Pendred's syndrome                                         |
| C031.                 | All            | Goitrous cretin                                            |
| C03y.                 | All            | Other specified congenital hypothyroidism                  |
| C03y0                 | All            | Congenital hypothyroidism with diffuse goitre              |
| C03y1                 | All            | Congenital hypothyroidism without goitre                   |
| C03z.                 | All            | Congenital hypothyroidism NOS                              |
| C040.                 | All            | Postsurgical hypothyroidism                                |
| C041.                 | All            | Other postablative hypothyroidism                          |
| C0410                 | All            | Irradiation hypothyroidism                                 |
| C041z                 | All            | Postablative hypothyroidism NOS                            |
| C042.                 | All            | Iodine hypothyroidism                                      |
| C043.                 | All            | Other iatrogenic hypothyroidism                            |
| C0430                 | All            | Hypothyroidism resulting from para-aminosalicylic acid     |
| C0431                 | All            | Hypothyroidism resulting from phenylbutazone               |
| C0432                 | All            | Hypothyroidism resulting from resorcinol                   |
| C043z                 | All            | Iatrogenic hypothyroidism NOS                              |
| C044.                 | All            | Postinfectious hypothyroidism                              |
| 71100                 | All            | Total thyroidectomy                                        |
| 71101                 | All            | Subtotal thyroidectomy                                     |
| 5A11.                 | All            | Thyroid gland ablat - irradiat                             |
| 5A12.                 | All            | Thyroid tumour/metast irradiat                             |
| C1343                 | All            | TSH - thyroid-stimulating hormone deficiency               |
| Q4337                 | All            | Neonatal jaunduce with congenital hypothyroidism           |
| <b>Read CTV3 Code</b> | <b>Term ID</b> | <b>Description</b>                                         |
| C03..                 | All            | Congenital hypothyroidism                                  |
| Xa017                 | All            | Congenital hypothyroidism with diffuse goitre              |
| X40H8                 | All            | Congenital hypothyroidism without goitre                   |
| PK251                 | All            | Congenital thyroid aplasia                                 |
| X40HA                 | All            | Congenital thyroid hypoplasia                              |
| X40HB                 | All            | Congenital atrophy of thyroid                              |
| X40HC                 | All            | Congenital hypothyroidism with ectopic thyroid             |
| C03y.                 | All            | Other specified congenital hypothyroidism                  |
| XE107                 | All            | Congenital hypothyroidism NOS                              |
| X40I7                 | All            | Congenital iodine deficiency hypothyroidism                |
| X40I8                 | All            | Congenital iodine deficiency syndrome - myxoedematous type |
| X40I9                 | All            | Congenital iodine deficiency syndrome - mixed type         |
| X40HL                 | All            | Iatrogenic hypothyroidism                                  |
| X40HM                 | All            | Postablative hypothyroidism                                |
| XE109                 | All            | Post-surgical hypothyroidism                               |
| C0410                 | All            | Irradiation hypothyroidism                                 |

|       |     |                                                            |
|-------|-----|------------------------------------------------------------|
| X40HN | All | Radioactive iodine-induced hypothyroidism                  |
| C041. | All | Other postablative hypothyroidism                          |
| C041z | All | Postablative hypothyroidism NOS                            |
| C043. | All | Other iatrogenic hypothyroidism                            |
| C043z | All | Iatrogenic hypothyroidism NOS                              |
| X40HO | All | Drug-induced hypothyroidism                                |
| C0430 | All | Hypothyroidism resulting from para-aminosalicylic acid     |
| C0431 | All | Hypothyroidism resulting from phenylbutazone               |
| C0432 | All | Hypothyroidism resulting from resorcinol                   |
| X40HP | All | Post-infectious hypothyroidism                             |
| X40IB | All | Subclinical iodine deficiency hypothyroidism               |
| C042. | All | Iodine hypothyroidism                                      |
| C1343 | All | TSH deficiency                                             |
| X40LB | All | Isolated TSH deficiency                                    |
| X40LC | All | Idiopathic TSH deficiency                                  |
| X40Hv | All | Hypothyroidism due to iodide trapping defect               |
| X40Hw | All | Hypothyroidism due to iodide organification defect         |
| X40Hx | All | Hypothyroidism due to coupling defect                      |
| X40Hy | All | Hypothyroidism due to deiodase defect                      |
| X40Hz | All | Hypothyroidism due to thyroglobulin synthesis defect       |
| Cyu11 | All | [X]Other specified hypothyroidism                          |
| Xa3ec | All | Hypothyroidism - congenital and acquired                   |
| C03.. | All | Congenital hypothyroidism                                  |
| Xa0l7 | All | Congenital hypothyroidism with diffuse goitre              |
| X40H8 | All | Congenital hypothyroidism without goitre                   |
| PK251 | All | Congenital thyroid aplasia                                 |
| X40HA | All | Congenital thyroid hypoplasia                              |
| X40HB | All | Congenital atrophy of thyroid                              |
| X40HC | All | Congenital hypothyroidism with ectopic thyroid             |
| C03y. | All | Other specified congenital hypothyroidism                  |
| XE107 | All | Congenital hypothyroidism NOS                              |
| X40I7 | All | Congenital iodine deficiency hypothyroidism                |
| X40I8 | All | Congenital iodine deficiency syndrome - myxoedematous type |
| X40I9 | All | Congenital iodine deficiency syndrome - mixed type         |
| X40HL | All | Iatrogenic hypothyroidism                                  |
| X40HM | All | Postablative hypothyroidism                                |
| XE109 | All | Post-surgical hypothyroidism                               |
| C0410 | All | Irradiation hypothyroidism                                 |
| X40HN | All | Radioactive iodine-induced hypothyroidism                  |
| C041. | All | Other postablative hypothyroidism                          |
| C041z | All | Postablative hypothyroidism NOS                            |
| C043. | All | Other iatrogenic hypothyroidism                            |
| C043z | All | Iatrogenic hypothyroidism NOS                              |
| X40HO | All | Drug-induced hypothyroidism                                |
| C0430 | All | Hypothyroidism resulting from para-aminosalicylic acid     |

|       |     |                                                      |
|-------|-----|------------------------------------------------------|
| C0431 | All | Hypothyroidism resulting from phenylbutazone         |
| C0432 | All | Hypothyroidism resulting from resorcinol             |
| X40HP | All | Post-infectious hypothyroidism                       |
| X40IB | All | Subclinical iodine deficiency hypothyroidism         |
| C042. | All | Iodine hypothyroidism                                |
| C1343 | All | TSH deficiency                                       |
| X40LB | All | Isolated TSH deficiency                              |
| X40LC | All | Idiopathic TSH deficiency                            |
| X40Hv | All | Hypothyroidism due to iodide trapping defect         |
| X40Hw | All | Hypothyroidism due to iodide organification defect   |
| X40Hx | All | Hypothyroidism due to coupling defect                |
| X40Hy | All | Hypothyroidism due to deiodase defect                |
| X40Hz | All | Hypothyroidism due to thyroglobulin synthesis defect |
| Cyu11 | All | [X]Other specified hypothyroidism                    |
| Xa3ec | All | Hypothyroidism - congenital and acquired             |
| Xa08g | All | Transient neonatal hypothyroidism                    |
| Q4337 | All | Neonatal jaundice with congenital hypothyroidism     |

**Supplementary table S4.8.** Read codes used to identify Grave's disease.

| <b>Grave's disease</b> |                |                                       |
|------------------------|----------------|---------------------------------------|
| <b>Read V2 Code</b>    | <b>Term ID</b> | <b>Description</b>                    |
| 66B4.                  | All            | Thyroid eye disease                   |
| C020.                  | All            | Graves' disease                       |
| C0200                  | All            | Toxic diffuse goitre with no crisis   |
| C0201                  | All            | Toxic diffuse goitre with crisis      |
| C020z                  | All            | Toxic diffuse goitre NOS              |
| F4G2.                  | All            | Endocrine exophthalmos                |
| F4G20                  | All            | Thyrotoxic exophthalmos               |
| F4G21                  | All            | Exophthalmic ophthalmoplegia          |
| F4G2z                  | All            | Endocrine exophthalmos NOS            |
| <b>Read CTV3 Code</b>  | <b>Term ID</b> | <b>Description</b>                    |
| F4G2.                  | All            | Dysthyroid ophthalmopathy             |
| F4G20                  | All            | Thyrotoxic exophthalmos               |
| F4G21                  | All            | Exophthalmic ophthalmoplegia          |
| F4G2z                  | All            | Endocrine exophthalmos NOS            |
| X400I                  | All            | Graves' disease                       |
| X40Gk                  | All            | Thyrotoxicosis due to Graves' disease |
| X400K                  | All            | Juvenile Graves' disease              |
| X400R                  | All            | Exophthalmic goitre                   |
| X40Gk                  | All            | Thyrotoxicosis due to Graves' disease |
| XS29G                  | All            | Thyroid eye disease                   |
| XE105                  | All            | Toxic diffuse goitre                  |
| C0200                  | All            | Toxic diffuse goitre with no crisis   |
| C0201                  | All            | Toxic diffuse goitre with crisis      |
| C020z                  | All            | Toxic diffuse goitre NOS              |



**Supplementary table S4.9.** Read codes used to identify psoriatic arthritis.

| <b>Psoriatic arthritis</b>    |                |                                                                   |
|-------------------------------|----------------|-------------------------------------------------------------------|
| <b>Read V2 Code</b>           | <b>Term ID</b> | <b>Description</b>                                                |
| M160.                         | All            | Psoriatic arthropathy                                             |
| M1601                         | All            | Distal interphalangeal psoriatic arthropathy                      |
| M160z                         | All            | Psoriatic arthropathy NOS                                         |
| Nyu13                         | All            | [X]Other psoriatic arthropathies                                  |
| M1600                         | All            | Psoriasis spondylitica                                            |
| M1602                         | All            | Arthritis mutilans                                                |
| <b>Read CTV3 Code</b>         | <b>Term ID</b> | <b>Description</b>                                                |
| M160.                         | All            | Psoriatic arthritis                                               |
| M1600                         | All            | Psoriatic arthritis with spine involvement                        |
| X7026                         | All            | Psoriatic arthritis with distal interphalangeal joint involvement |
| X7027                         | All            | Psoriatic arthritis - destructive type                            |
| X7028                         | All            | Psoriatic dactylitis                                              |
| X701u                         | All            | Juvenile psoriatic arthritis                                      |
| X701v                         | All            | Juvenile psoriatic arthritis with psoriasis                       |
| X701w                         | All            | Juvenile psoriatic arthritis without psoriasis                    |
| M160z                         | All            | Psoriatic arthropathy NOS                                         |
| Nyu13                         | All            | [X]Other psoriatic arthropathies                                  |
| <b>Ankylosing spondylitis</b> |                |                                                                   |
| <b>Read V2 Code</b>           | <b>Term ID</b> | <b>Description</b>                                                |
| N100.                         | All            | Ankylosing spondylitis                                            |
| N0450                         | All            | Juvenile ankylosing spondylitis                                   |
| <b>Read CTV3 Code</b>         | <b>Term ID</b> | <b>Description</b>                                                |
| N100.                         | All            | Ankylosing spondylitis                                            |
| X7023                         | All            | Ankylosing spondylitis with organ / system involvement            |
| X7024                         | All            | Ankylosing spondylitis with multisystem involvement               |
| X701x                         | All            | Juvenile ankylosing spondylitis                                   |

**Supplementary table S4.10.** Read codes used to identify ankylosing spondylitis.

| <b>Ankylosing spondylitis</b> |                |                                                        |
|-------------------------------|----------------|--------------------------------------------------------|
| <b>Read V2 Code</b>           | <b>Term ID</b> | <b>Description</b>                                     |
| N100.                         | All            | Ankylosing spondylitis                                 |
| N0450                         | All            | Juvenile ankylosing spondylitis                        |
| <b>Read CTV3 Code</b>         | <b>Term ID</b> | <b>Description</b>                                     |
| N100.                         | All            | Ankylosing spondylitis                                 |
| X7023                         | All            | Ankylosing spondylitis with organ / system involvement |
| X7024                         | All            | Ankylosing spondylitis with multisystem involvement    |
| X701x                         | All            | Juvenile ankylosing spondylitis                        |

**Supplementary table S4.11.** Read codes used to identify systemic lupus erythematosus.

| <b>Systemic lupus erythematosus</b> |                |                                                                  |
|-------------------------------------|----------------|------------------------------------------------------------------|
| <b>Read V2 Code</b>                 | <b>Term ID</b> | <b>Description</b>                                               |
| N000.                               | All            | Systemic lupus erythematosus                                     |
| N0000                               | All            | Disseminated lupus erythematosus                                 |
| N0001                               | All            | Libman-Sacks disease                                             |
| N0002                               | All            | Drug-induced systemic lupus erythematosus                        |
| N0003                               | All            | Systemic lupus erythematosus with organ or system involvement    |
| N0004                               | All            | Systemic lupus erythematosus with pericarditis                   |
| N0005                               | All            | Neonatal lupus erythematosus                                     |
| N0006                               | All            | Cerebral lupus                                                   |
| N000z                               | All            | Systemic lupus erythematosus NOS                                 |
| K01x4                               | All            | Nephrotic syndrome in systemic lupus erythematosus               |
| <b>Read CTV3 Code</b>               | <b>Term ID</b> | <b>Description</b>                                               |
| N000.                               | All            | Systemic lupus erythematosus                                     |
| X704X                               | All            | Systemic lupus erythematosus with organ/system involvement       |
| XE0da                               | All            | Lupus nephritis                                                  |
| X30Kn                               | All            | Lupus nephritis - WHO Class I                                    |
| X30Ko                               | All            | Lupus nephritis - WHO Class II                                   |
| X30Kp                               | All            | Lupus nephritis - WHO Class III                                  |
| X30Kq                               | All            | Lupus nephritis - WHO Class IV                                   |
| X30Kr                               | All            | Lupus nephritis - WHO Class V                                    |
| X30Ks                               | All            | Lupus nephritis - WHO Class VI                                   |
| XM197                               | All            | [EDTA] Lupus erythematosus associated with renal failure         |
| X00Dx                               | All            | Cerebral lupus                                                   |
| X704a                               | All            | Lupus panniculitis                                               |
| N0001                               | All            | Libman-Sacks disease                                             |
| XaC1J                               | All            | Systemic lupus erythematosus with pericarditis                   |
| X704c                               | All            | Systemic lupus erythematosus with multisystem involvement        |
| N0002                               | All            | Drug-induced systemic lupus erythematosus                        |
| N000z                               | All            | Systemic lupus erythematosus NOS                                 |
| Nyu43                               | All            | [X]Other forms of systemic lupus erythematosus                   |
| X0046                               | All            | Chorea in systemic lupus erythematosus                           |
| H57y4                               | All            | Lung disease with systemic lupus erythematosus                   |
| XaBE1                               | All            | Renal tubulo-interstitial disord in systemic lupus erythematosus |

**Supplementary table S4.12.** Read codes used to identify polymyalgia rheumatica.

| <b>Polymyalgia rheumatica</b> |                |                                                  |
|-------------------------------|----------------|--------------------------------------------------|
| <b>Read V2 Code</b>           | <b>Term ID</b> | <b>Description</b>                               |
| N20..                         | All            | Polymyalgia rheumatica                           |
| N200.                         | All            | Giant cell arteritis with polymyalgia rheumatica |
| <b>Read CTV3 Code</b>         | <b>Term ID</b> | <b>Description</b>                               |
| XE1FJ                         | All            | Polymyalgia rheumatica                           |
| X705I                         | All            | Giant cell arteritis with polymyalgia rheumatica |

**Supplementary table S4.13.** Read codes used to identify Sjögren's syndrome.

| <b>Sjögren's syndrome</b> |                |                                                            |
|---------------------------|----------------|------------------------------------------------------------|
| <b>Read V2 Code</b>       | <b>Term ID</b> | <b>Description</b>                                         |
| N002.                     | All            | Sicca (Sjogren's) syndrome                                 |
| F3967                     | All            | Myopathy due to Sjogren's disease                          |
| H57y3                     | All            | Lung disease with Sjogren's disease                        |
| <b>Read CTV3 Code</b>     | <b>Term ID</b> | <b>Description</b>                                         |
| Xa0hF                     | All            | Sjogren's syndrome                                         |
| X705A                     | All            | Primary Sjogren's syndrome                                 |
| X705B                     | All            | Primary Sjogren's syndrome with organ/system involvement   |
| X705C                     | All            | Primary Sjogren's syndrome with multisystem involvement    |
| X705D                     | All            | Secondary Sjogren's syndrome                               |
| X705E                     | All            | Secondary Sjogren's syndrome with organ/system involvement |
| X705F                     | All            | Secondary Sjogren's syndrome with multisystem involvement  |
| F3967                     | All            | Myopathy due to Sjogren's disease                          |
| H57y3                     | All            | Lung disease with Sjogren's disease                        |

**Supplementary table S4.14.** Read codes used to identify psoriasis.

| <b>Psoriasis</b>      |                |                                             |
|-----------------------|----------------|---------------------------------------------|
| <b>Read V2 Code</b>   | <b>Term ID</b> | <b>Description</b>                          |
| M16..                 | All            | Psoriasis and similar disorders             |
| M161.                 | All            | Other psoriasis                             |
| M1610                 | All            | Psoriasis unspecified                       |
| M1611                 | All            | Psoriasis annularis                         |
| M1612                 | All            | Psoriasis circinata                         |
| M1613                 | All            | Psoriasis diffusa                           |
| M1614                 | All            | Psoriasis discoidea                         |
| M1615                 | All            | Psoriasis geographica                       |
| M1616                 | All            | Guttate psoriasis                           |
| M1617                 | All            | Psoriasis gyrata                            |
| M1618                 | All            | Psoriasis inveterata                        |
| M1619                 | All            | Psoriasis ostracea                          |
| M161A                 | All            | Psoriasis palmaris                          |
| M161B                 | All            | Psoriasis plantaris                         |
| M161C                 | All            | Psoriasis punctata                          |
| M161D                 | All            | Pustular psoriasis                          |
| M161E                 | All            | Psoriasis universalis                       |
| M161F                 | All            | Psoriasis vulgaris                          |
| M161G                 | All            | Acrodermatitis continua                     |
| M161H                 | All            | Erythrodermic psoriasis                     |
| M161J                 | All            | Flexural psoriasis                          |
| M161z                 | All            | Psoriasis NOS                               |
| M166.                 | All            | Palmoplantar pustular psoriasis             |
| M16y.                 | All            | Other psoriasis and similar disorders       |
| M16y0                 | All            | Scalp psoriasis                             |
| M16z.                 | All            | Psoriasis and similar disorders NOS         |
| Myu30                 | All            | [X]Other psoriasis                          |
| <b>Read CTV3 Code</b> | <b>Term ID</b> | <b>Description</b>                          |
| X506Y                 | All            | Psoriasis                                   |
| XaY0x                 | All            | Pustular psoriasis                          |
| X506p                 | All            | Generalised pustular psoriasis              |
| X506q                 | All            | Acute generalised pustular psoriasis        |
| X506r                 | All            | Generalised pustular psoriasis of pregnancy |
| X506s                 | All            | Pustular psoriasis in children              |
| X506t                 | All            | Juvenile pustular psoriasis                 |
| X506u                 | All            | Infantile pustular psoriasis                |
| X506l                 | All            | Localised pustular psoriasis                |
| X506m                 | All            | Palmoplantar pustular psoriasis             |
| M07y0                 | All            | Acute palmoplantar pustular psoriasis       |
| M161A                 | All            | Psoriasis palmaris                          |

|       |     |                                          |
|-------|-----|------------------------------------------|
| M161B | All | Psoriasis plantaris                      |
| X506o | All | Lapiere type of psoriasis                |
| X506v | All | Circinate and annular pustular psoriasis |
| M1611 | All | Psoriasis annularis                      |
| M1612 | All | Psoriasis circinata                      |
| M1614 | All | Plaque psoriasis                         |
| XaNXa | All | Chronic large plaque psoriasis           |
| M1616 | All | Guttate psoriasis                        |
| X506Z | All | Flexural psoriasis                       |
| X506a | All | Unstable psoriasis                       |
| X506b | All | Erythrodermic psoriasis                  |
| X506i | All | Scalp psoriasis                          |
| M161. | All | Other psoriasis                          |
| M1610 | All | Psoriasis unspecified                    |
| M1613 | All | Psoriasis diffusa                        |
| M1615 | All | Psoriasis geographica                    |
| M1617 | All | Psoriasis gyrata                         |
| M1618 | All | Psoriasis inveterata                     |
| M161C | All | Psoriasis punctata                       |
| M161E | All | Psoriasis universalis                    |
| XaNXt | All | Psoriasis vulgaris                       |
| M161z | All | Psoriasis NOS                            |
| Myu30 | All | [X]Other psoriasis                       |

**Supplementary table S4.15.** Read codes used to identify vitiligo.

| <b>Vitiligo</b>       |                |                       |
|-----------------------|----------------|-----------------------|
| <b>Read V2 Code</b>   | <b>Term ID</b> | <b>Description</b>    |
| M2951                 | All            | Vitiligo              |
| F4E53                 | All            | Vitiligo of eyelid    |
| <b>Read CTV3 Code</b> | <b>Term ID</b> | <b>Description</b>    |
| M2951                 | All            | Vitiligo              |
| F4E53                 | All            | Vitiligo of eyelid    |
| X508z                 | All            | Occupational vitiligo |

**Supplementary table S4.16.** Read codes used to identify multiple sclerosis.

| <b>Multiple sclerosis</b> |                |                                                                                              |
|---------------------------|----------------|----------------------------------------------------------------------------------------------|
| <b>Read V2 Code</b>       | <b>Term ID</b> | <b>Description</b>                                                                           |
| 666A.                     | All            | Multiple sclerosis review                                                                    |
| 9mD..                     | All            | Multiple sclerosis monitoring administration                                                 |
| 9mD0.                     | All            | Multiple sclerosis monitoring first letter                                                   |
| 9mD1.                     | All            | Multiple sclerosis monitoring second letter                                                  |
| 9mD2.                     | All            | Multiple sclerosis monitoring telephone invitation                                           |
| 9mD3.                     | All            | Multiple sclerosis monitoring third letter                                                   |
| F20..                     | All            | Multiple sclerosis                                                                           |
| F200.                     | All            | Multiple sclerosis of the brain stem                                                         |
| F201.                     | All            | Multiple sclerosis of the spinal cord                                                        |
| F202.                     | All            | Generalised multiple sclerosis                                                               |
| F203.                     | All            | Exacerbation of multiple sclerosis                                                           |
| F204.                     | All            | Benign multiple sclerosis                                                                    |
| F205.                     | All            | Malignant multiple sclerosis                                                                 |
| F206.                     | All            | Primary progressive multiple sclerosis                                                       |
| F207.                     | All            | Relapsing and remitting multiple sclerosis                                                   |
| F208.                     | All            | Secondary progressive multiple sclerosis                                                     |
| F20z.                     | All            | Multiple sclerosis NOS                                                                       |
| 8CS1.                     | All            | Multiple sclerosis care plan agreed                                                          |
| 9kG..                     | All            | Specialised services for patients with multiple sclerosis - enhanced services administration |
| <b>Read CTV3 Code</b>     | <b>Term ID</b> | <b>Description</b>                                                                           |
| XaKvm                     | All            | Multiple sclerosis review                                                                    |
| XaKvn                     | All            | Multiple sclerosis multidisciplinary review                                                  |
| XaX9A                     | All            | Multiple sclerosis monitoring administration                                                 |
| XaX9F                     | All            | Multiple sclerosis monitoring first letter                                                   |
| XaX9H                     | All            | Multiple sclerosis monitoring second letter                                                  |
| XaX9J                     | All            | Multiple sclerosis monitoring telephone invitation                                           |
| XaX9L                     | All            | Multiple sclerosis monitoring third letter                                                   |
| F20..                     | All            | Multiple sclerosis                                                                           |
| XaP1V                     | All            | Secondary progressive multiple sclerosis                                                     |
| XaP1B                     | All            | Relapsing and remitting multiple sclerosis                                                   |
| XaP0r                     | All            | Primary progressive multiple sclerosis                                                       |
| XaP0X                     | All            | Malignant multiple sclerosis                                                                 |
| XaOzZ                     | All            | Benign multiple sclerosis                                                                    |
| X005c                     | All            | Acute relapsing multiple sclerosis                                                           |
| X005d                     | All            | Chronic progressive multiple sclerosis                                                       |
| X005e                     | All            | Remittent-progressive multiple sclerosis                                                     |
| F200.                     | All            | Multiple sclerosis of the brainstem                                                          |
| F201.                     | All            | Multiple sclerosis of the spinal cord                                                        |
| F202.                     | All            | Generalised multiple sclerosis                                                               |



|       |     |                                                                                            |
|-------|-----|--------------------------------------------------------------------------------------------|
| F203. | All | Exacerbation of multiple sclerosis                                                         |
| F20z. | All | Multiple sclerosis NOS                                                                     |
| XaPSc | All | Management of multiple sclerosis in palliative phase                                       |
| XaPSb | All | Management of multiple sclerosis in progressive disability phase                           |
| XaPSa | All | Management of multiple sclerosis in stable disability phase                                |
| XaPSZ | All | Management of multiple sclerosis in early disease phase                                    |
| XaPSY | All | Management of multiple sclerosis in onset phase                                            |
| XaXsg | All | Referral to community multiple sclerosis team                                              |
| XaKA8 | All | Specialised services for patients with multiple sclerosis enhanced services administration |
| XaKzg | All | Multiple sclerosis care plan agreed                                                        |

For peer review only

## Definitions of common infections with Read code lists.

**Supplementary table S5.1.** The case definitions for included Upper Respiratory Tract Infections.

| Upper Respiratory Tract Infections |         |                                                           |
|------------------------------------|---------|-----------------------------------------------------------|
| Read V2 Code                       | Term ID | Description                                               |
| F51..                              | All     | Nonsuppurative otitis media + eustachian tube disorders   |
| F510.                              | All     | Acute non suppurative otitis media                        |
| F5100                              | All     | Acute otitis media with effusion                          |
| F5101                              | All     | Acute serous otitis media                                 |
| F5102                              | All     | Acute mucoid otitis media                                 |
| F5103                              | All     | Acute sanguinous otitis media                             |
| F5104                              | All     | Acute allergic serous otitis media                        |
| F5105                              | All     | Acute allergic mucoid otitis media                        |
| F5106                              | All     | Acute allergic sanguinous otitis media                    |
| F510z                              | All     | Acute nonsuppurative otitis media NOS                     |
| F52..                              | All     | Suppurative and unspecified otitis media                  |
| F520.                              | All     | Acute suppurative otitis media                            |
| F5200                              | All     | Acute suppurative otitis media tympanic membrane intact   |
| F5201                              | All     | Acute suppurative otitis media tympanic membrane ruptured |
| F5203                              | All     | Acute suppurative otitis media due to disease EC          |
| F520z                              | All     | Acute suppurative otitis media NOS                        |
| F526.                              | All     | Acute left otitis media                                   |
| F527.                              | All     | Acute right otitis media                                  |
| F528.                              | All     | Acute bilateral otitis media                              |
| F52z.                              | All     | Otitis media NOS                                          |
| H00..                              | All     | Acute nasopharyngitis                                     |
| H01..                              | All     | Acute sinusitis                                           |
| H010.                              | All     | Acute maxillary sinusitis                                 |
| H011.                              | All     | Acute frontal sinusitis                                   |
| H012.                              | All     | Acute ethmoidal sinusitis                                 |
| H013.                              | All     | Acute sphenoidal sinusitis                                |
| H014.                              | All     | Acute rhinosinusitis                                      |
| H01y.                              | All     | Other acute sinusitis                                     |
| H01y0                              | All     | Acute pansinusitis                                        |
| H01yz                              | All     | Other acute sinusitis NOS                                 |
| H01z.                              | All     | Acute sinusitis NOS                                       |
| H02..                              | All     | Acute pharyngitis                                         |
| H020.                              | All     | Acute gangrenous pharyngitis                              |
| H021.                              | All     | Acute phlegmonous pharyngitis                             |
| H022.                              | All     | Acute ulcerative pharyngitis                              |

|       |     |                                             |
|-------|-----|---------------------------------------------|
| H023. | All | Acute bacterial pharyngitis                 |
| H0230 | All | Acute pneumococcal pharyngitis              |
| H0231 | All | Acute staphylococcal pharyngitis            |
| H023z | All | Acute bacterial pharyngitis NOS             |
| H024. | All | Acute viral pharyngitis                     |
| H025. | All | Allergic pharyngitis                        |
| H02z. | All | Acute pharyngitis NOS                       |
| H03.. | All | Acute tonsillitis                           |
| H030. | All | Acute erythematous tonsillitis              |
| H031. | All | Acute follicular tonsillitis                |
| H032. | All | Acute ulcerative tonsillitis                |
| H033. | All | Acute catarrhal tonsillitis                 |
| H034. | All | Acute gangrenous tonsillitis                |
| H035. | All | Acute bacterial tonsillitis                 |
| H0350 | All | Acute pneumococcal tonsillitis              |
| H0351 | All | Acute staphylococcal tonsillitis            |
| H035z | All | Acute bacterial tonsillitis NOS             |
| H036. | All | Acute viral tonsillitis                     |
| H037. | All | Recurrent acute tonsillitis                 |
| H03z. | All | Acute tonsillitis NOS                       |
| H04.. | All | Acute laryngitis and tracheitis             |
| H040. | All | Acute laryngitis                            |
| H0400 | All | Acute oedematous laryngitis                 |
| H0401 | All | Acute ulcerative laryngitis                 |
| H0402 | All | Acute catarrhal laryngitis                  |
| H0403 | All | Acute phlegmonous laryngitis                |
| H0404 | All | Acute haemophilus influenzae laryngitis     |
| H0405 | All | Acute pneumococcal laryngitis               |
| H0406 | All | Acute suppurative laryngitis                |
| H040w | All | Acute viral laryngitis unspecified          |
| H040x | All | Acute bacterial laryngitis unspecified      |
| H040z | All | Acute laryngitis NOS                        |
| H041. | All | Acute tracheitis                            |
| H0410 | All | Acute tracheitis without obstruction        |
| H0411 | All | Acute tracheitis with obstruction           |
| H041z | All | Acute tracheitis NOS                        |
| H042. | All | Acute laryngotracheitis                     |
| H0420 | All | Acute laryngotracheitis without obstruction |
| H0421 | All | Acute laryngotracheitis with obstruction    |
| H042z | All | Acute laryngotracheitis NOS                 |
| H043. | All | Acute epiglottitis (non strep)              |
| H0430 | All | Acute epiglottitis without obstruction      |

|                       |                |                                                             |
|-----------------------|----------------|-------------------------------------------------------------|
| H0431                 | All            | Acute epiglottitis with obstruction                         |
| H0432                 | All            | Acute obstructive laryngitis                                |
| H043z                 | All            | Acute epiglottitis NOS                                      |
| H044.                 | All            | Croup                                                       |
| H04z.                 | All            | Acute laryngitis and tracheitis NOS                         |
| H05..                 | All            | Other acute upper respiratory infections                    |
| H050.                 | All            | Acute laryngopharyngitis                                    |
| H051.                 | All            | Acute upper respiratory tract infection                     |
| H052.                 | All            | Pharyngotracheitis                                          |
| H053.                 | All            | Tracheopharyngitis                                          |
| H054.                 | All            | Recurrent upper respiratory tract infection                 |
| H055.                 | All            | Pharyngolaryngitis                                          |
| H05y.                 | All            | Other upper respiratory infections of multiple sites        |
| H05z.                 | All            | Upper respiratory infection NOS                             |
| H0y..                 | All            | Other specified acute respiratory infections                |
| H0z..                 | All            | Acute respiratory infection NOS                             |
| <b>Read CTV3 Code</b> | <b>Term ID</b> | <b>Description</b>                                          |
| A3401                 | All            | Streptococcal laryngitis                                    |
| A3403                 | All            | Streptococcal tonsillitis                                   |
| A740.                 | All            | Herpangina                                                  |
| AA12.                 | All            | Vincent's angina - pharyngitis                              |
| F51..                 | All            | Non-suppurative otitis media with eustachian tube disorders |
| F510.                 | All            | Acute non-suppurative otitis media                          |
| F5100                 | All            | Acute otitis media: [with effusion] or [secretory]          |
| F5101                 | All            | Acute non-suppurative otitis media - serous                 |
| F5102                 | All            | Acute non-suppurative otitis media - mucoid                 |
| F5103                 | All            | Acute non-suppurative otitis media - sanguinous             |
| F5104                 | All            | Acute allergic serous otitis media                          |
| F5105                 | All            | Acute allergic mucoid otitis media                          |
| F5106                 | All            | Acute allergic sanguinous otitis media                      |
| F510z                 | All            | Acute non-suppurative otitis media NOS                      |
| F52..                 | All            | Suppurative and unspecified otitis media                    |
| F520.                 | All            | Acute suppurative otitis media                              |
| F5200                 | All            | Acute suppurative otitis media - tympanic membrane intact   |
| F5201                 | All            | Acute suppurative otitis media - tympanic membrane ruptured |
| F5203                 | All            | Acute suppurative otitis media due to disease EC            |
| F520z                 | All            | Acute suppurative otitis media NOS                          |
| F526.                 | All            | Acute left otitis media                                     |
| F527.                 | All            | Acute right otitis media                                    |
| F528.                 | All            | Acute bilateral otitis media                                |
| F52z.                 | All            | Ear infection &/or otitis media NOS                         |
| FyuP0                 | All            | [X]Other acute non-suppurative otitis media                 |
| H00..                 | All            | (Acute nasopharyngitis or rhinitis) or (common cold)        |

|       |     |                                                                    |
|-------|-----|--------------------------------------------------------------------|
| H01.. | All | Sinusitis (& acute)                                                |
| H010. | All | Acute maxillary sinusitis                                          |
| H011. | All | Acute frontal sinusitis                                            |
| H012. | All | Acute ethmoidal sinusitis                                          |
| H013. | All | Acute sphenoidal sinusitis                                         |
| H014. | All | NULL                                                               |
| H01y. | All | Other acute sinusitis                                              |
| H01y0 | All | Acute pansinusitis                                                 |
| H01yz | All | Other acute sinusitis NOS                                          |
| H01z. | All | Acute sinusitis NOS                                                |
| H02.. | All | Throat: [acute pharyngitis] or [sore NOS (& viral)] or [infection] |
| H020. | All | Acute gangrenous pharyngitis                                       |
| H021. | All | Acute phlegmonous pharyngitis                                      |
| H022. | All | Acute ulcerative pharyngitis                                       |
| H023. | All | Acute bacterial pharyngitis                                        |
| H0230 | All | Acute pneumococcal pharyngitis                                     |
| H0231 | All | Acute staphylococcal pharyngitis                                   |
| H023z | All | Acute bacterial pharyngitis NOS                                    |
| H024. | All | Acute viral pharyngitis                                            |
| H025. | All | Allergic pharyngitis                                               |
| H02z. | All | Acute pharyngitis NOS                                              |
| H03.. | All | Tonsillitis (& acute)                                              |
| H030. | All | Acute erythematous tonsillitis                                     |
| H031. | All | Acute follicular tonsillitis                                       |
| H032. | All | Acute ulcerative tonsillitis                                       |
| H033. | All | Acute catarrhal tonsillitis                                        |
| H034. | All | Acute gangrenous tonsillitis                                       |
| H035. | All | Acute bacterial tonsillitis                                        |
| H0350 | All | Acute pneumococcal tonsillitis                                     |
| H0351 | All | Acute staphylococcal tonsillitis                                   |
| H035z | All | Acute bacterial tonsillitis NOS                                    |
| H036. | All | Acute viral tonsillitis                                            |
| H037. | All | Recurrent acute tonsillitis                                        |
| H03z. | All | Acute tonsillitis NOS                                              |
| H04.. | All | NULL                                                               |
| H040. | All | Acute laryngitis                                                   |
| H0400 | All | Acute oedematous laryngitis                                        |
| H0401 | All | Acute ulcerative laryngitis                                        |
| H0402 | All | Acute catarrhal laryngitis                                         |
| H0403 | All | Acute phlegmonous laryngitis                                       |
| H0404 | All | Acute haemophilus influenzae laryngitis                            |
| H0405 | All | Acute pneumococcal laryngitis                                      |

|       |     |                                                      |
|-------|-----|------------------------------------------------------|
| H0406 | All | Acute suppurative laryngitis                         |
| H040w | All | Acute viral laryngitis unspecified                   |
| H040x | All | Acute bacterial laryngitis unspecified               |
| H040z | All | Acute laryngitis NOS                                 |
| H041. | All | Acute tracheitis                                     |
| H0410 | All | Acute tracheitis without obstruction                 |
| H0411 | All | Acute tracheitis with obstruction                    |
| H041z | All | Acute tracheitis NOS                                 |
| H042. | All | Laryngotracheitis (& acute)                          |
| H0420 | All | Acute laryngotracheitis without obstruction          |
| H0421 | All | Acute laryngotracheitis with obstruction             |
| H042z | All | Acute laryngotracheitis NOS                          |
| H043. | All | Epiglottitis: [viral] or [acute non streptococcal]   |
| H0430 | All | Acute epiglottitis without obstruction               |
| H0431 | All | Acute epiglottitis with obstruction                  |
| H0432 | All | NULL                                                 |
| H043z | All | Acute epiglottitis NOS                               |
| H044. | All | NULL                                                 |
| H04z. | All | Acute laryngitis and tracheitis NOS                  |
| H05.. | All | Other acute upper respiratory infections             |
| H050. | All | Acute laryngopharyngitis                             |
| H051. | All | NULL                                                 |
| H052. | All | NULL                                                 |
| H053. | All | Tracheopharyngitis                                   |
| H054. | All | Recurrent upper respiratory tract infection          |
| H055. | All | Pharyngolaryngitis                                   |
| H05y. | All | Other upper respiratory infections of multiple sites |
| H05z. | All | Upper respiratory tract infection (& viral) NOS      |
| H0y.. | All | Other specified acute respiratory infections         |
| H0z.. | All | Acute respiratory infection NOS                      |
| X00iq | All | Recurrent acute suppurative otitis media             |
| X00m1 | All | Pott's puffy tumour                                  |
| X00mH | All | Acute herpes simplex pharyngitis                     |
| X00mI | All | Acute herpes zoster pharyngitis                      |
| X00mJ | All | Enteroviral lymphonodular pharyngitis                |
| X00mL | All | Glandular fever pharyngitis                          |
| X00mq | All | Vincent's tonsillitis                                |
| X00n1 | All | Acute simple laryngitis                              |
| X00n2 | All | Vincent's laryngitis                                 |
| X00n4 | All | Acute membranous laryngitis                          |
| X00n5 | All | Acute subglottic laryngitis                          |
| X00n6 | All | Recurrent allergic croup                             |

|       |     |                                                                              |
|-------|-----|------------------------------------------------------------------------------|
| X1003 | All | Viral upper respiratory tract infection NOS                                  |
| Xa0IW | All | Acute laryngotracheobronchitis                                               |
| Xa86D | All | Acute viral laryngotracheitis                                                |
| XaKyZ | All | Acute obstructive laryngitis                                                 |
| XE0Xo | All | Acute laryngotracheitis                                                      |
| XE0Xq | All | Upper respiratory infection NOS                                              |
| XE17D | All | Otitis media NOS                                                             |
| XE1A1 | All | Suppurative otitis media &/or ([left] or [right]) &/or purulent otitis media |
| XE2QD | All | Acute otitis media with effusion                                             |
| XM1QT | All | Acute fibrinous laryngotracheobronchitis                                     |

For peer review only



**Supplementary table S5.2.** The case definitions for included Lower Respiratory Tract Infections.

| <b>Lower Respiratory Tract Infections</b> |                |                                                       |
|-------------------------------------------|----------------|-------------------------------------------------------|
| <b>Pneumonia</b>                          |                |                                                       |
| <b>Read V2 Code</b>                       | <b>Term ID</b> | <b>Description</b>                                    |
| H20..                                     | All            | Viral pneumonia                                       |
| H200.                                     | All            | Pneumonia due to adenovirus                           |
| H201.                                     | All            | Pneumonia due to respiratory syncytial virus          |
| H202.                                     | All            | Pneumonia due to parainfluenza virus                  |
| H203.                                     | All            | Pneumonia due to human metapneumovirus                |
| H20y.                                     | All            | Viral pneumonia NEC                                   |
| H20y0                                     | All            | Severe acute respiratory syndrome                     |
| H20z.                                     | All            | Viral pneumonia NOS                                   |
| H21..                                     | All            | Lobar (pneumococcal) pneumonia                        |
| H22..                                     | All            | Other bacterial pneumonia                             |
| H220.                                     | All            | Pneumonia due to klebsiella pneumoniae                |
| H221.                                     | All            | Pneumonia due to pseudomonas                          |
| H222.                                     | All            | Pneumonia due to haemophilus influenzae               |
| H223.                                     | All            | Pneumonia due to streptococcus                        |
| H2230                                     | All            | Pneumonia due to streptococcus, group B               |
| H224.                                     | All            | Pneumonia due to staphylococcus                       |
| H22y.                                     | All            | Pneumonia due to other specified bacteria             |
| H22y0                                     | All            | Pneumonia due to escherichia coli                     |
| H22y1                                     | All            | Pneumonia due to proteus                              |
| H22y2                                     | All            | Pneumonia - Legionella                                |
| H22y3                                     | All            | Pneumonia due to Gram negative bacteria               |
| H22yX                                     | All            | Pneumonia due to other aerobic gram-negative bacteria |
| H22yz                                     | All            | Pneumonia due to bacteria NOS                         |
| H22z.                                     | All            | Bacterial pneumonia NOS                               |
| H23..                                     | All            | Pneumonia due to other specified organisms            |
| H230.                                     | All            | Pneumonia due to Eaton's agent                        |
| H231.                                     | All            | Pneumonia due to mycoplasma pneumoniae                |
| H232.                                     | All            | Pneumonia due to pleuropneumonia like organisms       |
| H233.                                     | All            | Chlamydial pneumonia                                  |
| H23z.                                     | All            | Pneumonia due to specified organism NOS               |
| H24..                                     | All            | Pneumonia with infectious diseases EC                 |
| H240.                                     | All            | Pneumonia with measles                                |
| H241.                                     | All            | Pneumonia with cytomegalic inclusion disease          |
| H242.                                     | All            | Pneumonia with ornithosis                             |
| H243.                                     | All            | Pneumonia with whooping cough                         |
| H244.                                     | All            | Pneumonia with tularaemia                             |
| H245.                                     | All            | Pneumonia with anthrax                                |
| H246.                                     | All            | Pneumonia with aspergillosis                          |

|                       |                |                                                 |
|-----------------------|----------------|-------------------------------------------------|
| H247.                 | All            | Pneumonia with other systemic mycoses           |
| H2470                 | All            | Pneumonia with candidiasis                      |
| H2471                 | All            | Pneumonia with coccidioidomycosis               |
| H2472                 | All            | Pneumonia with histoplasmosis                   |
| H247z                 | All            | Pneumonia with systemic mycosis NOS             |
| H24y.                 | All            | Pneumonia with other infectious diseases EC     |
| H24y0                 | All            | Pneumonia with actinomycosis                    |
| H24y1                 | All            | Pneumonia with nocardiasis                      |
| H24y2                 | All            | Pneumonia with pneumocystis carinii             |
| H24y3                 | All            | Pneumonia with Q-fever                          |
| H24y4                 | All            | Pneumonia with salmonellosis                    |
| H24y5                 | All            | Pneumonia with toxoplasmosis                    |
| H24y6                 | All            | Pneumonia with typhoid fever                    |
| H24y7                 | All            | Pneumonia with varicella                        |
| H24yz                 | All            | Pneumonia with other infectious diseases EC NOS |
| H24z.                 | All            | Pneumonia with infectious diseases EC NOS       |
| H25..                 | All            | Bronchopneumonia due to unspecified organism    |
| H26..                 | All            | Pneumonia due to unspecified organism           |
| H260.                 | All            | Lobar pneumonia due to unspecified organism     |
| H2600                 | All            | Lung consolidation                              |
| H261.                 | All            | Basal pneumonia due to unspecified organism     |
| H262.                 | All            | Postoperative pneumonia                         |
| H263.                 | All            | Pneumonitis, unspecified                        |
| H28..                 | All            | Atypical pneumonia                              |
| <b>Read CTV3 Code</b> | <b>Term ID</b> | <b>Description</b>                              |
| H20..                 | All            | Viral pneumonia (& chest infection)             |
| H200.                 | All            | Adenoviral pneumonia                            |
| H201.                 | All            | Pneumonia due to respiratory syncytial virus    |
| H202.                 | All            | Parainfluenzal pneumonia                        |
| H203.                 | All            | NULL                                            |
| H20y.                 | All            | Viral pneumonia NEC                             |
| H20y0                 | All            | NULL                                            |
| H20z.                 | All            | Viral pneumonia NOS                             |
| H21..                 | All            | Pneumococcal pneumonia (& lobar)                |
| H22..                 | All            | Other bacterial pneumonia                       |
| H220.                 | All            | Pneumonia due to Klebsiella pneumoniae          |
| H221.                 | All            | Pseudomonal pneumonia                           |
| H222.                 | All            | Haemophilus influenzae pneumonia                |
| H223.                 | All            | Streptococcal pneumonia                         |
| H2230                 | All            | Group B streptococcal pneumonia                 |
| H224.                 | All            | Staphylococcal pneumonia                        |
| H22y.                 | All            | Pneumonia due to other specified bacteria       |
| H22y0                 | All            | Escherichia coli pneumonia                      |
| H22y1                 | All            | Proteus pneumonia                               |

|       |     |                                                                             |
|-------|-----|-----------------------------------------------------------------------------|
| H22y2 | All | Legionella pneumonia                                                        |
| H22y3 | All | NULL                                                                        |
| H22yX | All | NULL                                                                        |
| H22yz | All | Pneumonia due to bacteria NOS                                               |
| H22z. | All | Bacterial pneumonia NOS                                                     |
| H23.. | All | Pneumonia due to other specified organisms                                  |
| H230. | All | NULL                                                                        |
| H231. | All | NULL                                                                        |
| H232. | All | Pneumonia due to pleuropneumonia-like organism                              |
| H233. | All | NULL                                                                        |
| H23z. | All | Pneumonia due to specified organism NOS                                     |
| H24.. | All | (Pneumonia) or (chest infection) with infectious diseases EC                |
| H240. | All | Measles pneumonia                                                           |
| H241. | All | Cytomegalovirus pneumonia                                                   |
| H242. | All | Ornithosis with pneumonia                                                   |
| H243. | All | Pertussis pneumonia                                                         |
| H244. | All | Tularaemia pneumonia                                                        |
| H245. | All | Anthrax pneumonia                                                           |
| H246. | All | Pneumonia with aspergillosis                                                |
| H247. | All | Pneumonia with other systemic mycoses                                       |
| H2470 | All | Candidal pneumonia                                                          |
| H2471 | All | Pneumonia with coccidioidomycosis                                           |
| H2472 | All | Pneumonia with histoplasmosis                                               |
| H247z | All | Pneumonia with systemic mycosis NOS                                         |
| H24y. | All | Pneumonia with other infectious diseases EC                                 |
| H24y0 | All | Actinomycotic pneumonia                                                     |
| H24y1 | All | Nocardial pneumonia                                                         |
| H24y2 | All | Pneumocystis carinii pneumonia                                              |
| H24y3 | All | Q fever pneumonia                                                           |
| H24y4 | All | NULL                                                                        |
| H24y5 | All | Toxoplasma pneumonia                                                        |
| H24y6 | All | Typhoid pneumonia                                                           |
| H24y7 | All | Chickenpox pneumonia                                                        |
| H24yz | All | Pneumonia with other infectious diseases EC NOS                             |
| H24z. | All | Pneumonia with infectious diseases EC NOS                                   |
| H25.. | All | Bronchopneumonia: [unspecified organism] or [chest infection - unspecified] |
| H26.. | All | Pneumonia due to unspecified organism                                       |
| H260. | All | Lobar pneumonia due to unspecified organism                                 |
| H2600 | All | NULL                                                                        |
| H261. | All | NULL                                                                        |
| H262. | All | NULL                                                                        |
| H263. | All | NULL                                                                        |
| H28.. | All | NULL                                                                        |
| X100h | All | Giant cell pneumonia                                                        |
| XaBE9 | All | Basal pneumonia due to unspecified organism                                 |

|                         |                |                                                        |
|-------------------------|----------------|--------------------------------------------------------|
| XaDtI                   | All            | Legionnaire's disease                                  |
| XEOYJ                   | All            | Bronchopneumonia due to unspecified organism           |
| <b>Acute Bronchitis</b> |                |                                                        |
| <b>Read V2 Code</b>     | <b>Term ID</b> | <b>Description</b>                                     |
| H06..                   | All            | Acute bronchitis and bronchiolitis                     |
| H060.                   | All            | Acute bronchitis                                       |
| H0600                   | All            | Acute fibrinous bronchitis                             |
| H0601                   | All            | Acute membranous bronchitis                            |
| H0602                   | All            | Acute pseudomembranous bronchitis                      |
| H0603                   | All            | Acute purulent bronchitis                              |
| H0604                   | All            | Acute croupous bronchitis                              |
| H0605                   | All            | Acute tracheobronchitis                                |
| H0606                   | All            | Acute pneumococcal bronchitis                          |
| H0607                   | All            | Acute streptococcal bronchitis                         |
| H0608                   | All            | Acute haemophilus influenzae bronchitis                |
| H0609                   | All            | Acute neisseria catarrhalis bronchitis                 |
| H060A                   | All            | Acute bronchitis due to mycoplasma pneumoniae          |
| H060B                   | All            | Acute bronchitis due to coxsackievirus                 |
| H060C                   | All            | Acute bronchitis due to parainfluenza virus            |
| H060D                   | All            | Acute bronchitis due to respiratory syncytial virus    |
| H060E                   | All            | Acute bronchitis due to rhinovirus                     |
| H060F                   | All            | Acute bronchitis due to echovirus                      |
| H060v                   | All            | Subacute bronchitis unspecified                        |
| H060w                   | All            | Acute viral bronchitis unspecified                     |
| H060x                   | All            | Acute bacterial bronchitis unspecified                 |
| H060z                   | All            | Acute bronchitis NOS                                   |
| H061.                   | All            | Acute bronchiolitis                                    |
| H0610                   | All            | Acute capillary bronchiolitis                          |
| H0611                   | All            | Acute obliterating bronchiolitis                       |
| H0612                   | All            | Acute bronchiolitis with bronchospasm                  |
| H0613                   | All            | Acute exudative bronchiolitis                          |
| H0614                   | All            | Obliterating fibrous bronchiolitis                     |
| H0615                   | All            | Acute bronchiolitis due to respiratory syncytial virus |
| H0616                   | All            | Acute bronchiolitis due to other specified organisms   |
| H0617                   | All            | Acute bronchiolitis due to human metapneumovirus       |
| H061z                   | All            | Acute bronchiolitis NOS                                |
| H062.                   | All            | Acute lower respiratory tract infection                |
| H06z.                   | All            | Acute bronchitis or bronchiolitis NOS                  |
| H06z0                   | All            | Chest infection NOS                                    |
| H06z1                   | All            | Lower resp tract infection                             |
| H06z2                   | All            | Recurrent chest infection                              |
| H30..                   | All            | Bronchitis unspecified                                 |
| H300.                   | All            | Tracheobronchitis NOS                                  |

|                |         |                                                        |
|----------------|---------|--------------------------------------------------------|
| H301.          | All     | Laryngotracheobronchitis                               |
| H302.          | All     | Wheezy bronchitis                                      |
| H30z.          | All     | Bronchitis NOS                                         |
| Read CTV3 Code | Term ID | Description                                            |
| A33y.          | All     | Whooping cough - other specified organism              |
| A33yz          | All     | Other whooping cough NOS                               |
| A33z.          | All     | Whooping cough NOS                                     |
| Ayu39          | All     | [X]Whooping cough due to other Bordetella species      |
| Ayu3A          | All     | [X]Whooping cough, unspecified                         |
| H06..          | All     | Acute bronchitis and bronchiolitis                     |
| H060.          | All     | Acute bronchitis (& wheezy)                            |
| H0600          | All     | Acute fibrinous bronchitis                             |
| H0601          | All     | Acute membranous bronchitis                            |
| H0602          | All     | Acute pseudomembranous bronchitis                      |
| H0603          | All     | Acute purulent bronchitis                              |
| H0604          | All     | Acute croupous bronchitis                              |
| H0605          | All     | Acute tracheobronchitis                                |
| H0606          | All     | Acute pneumococcal bronchitis                          |
| H0607          | All     | Acute streptococcal bronchitis                         |
| H0608          | All     | Acute haemophilus influenzae bronchitis                |
| H0609          | All     | Acute Neisseria catarrhalis bronchitis                 |
| H060A          | All     | NULL                                                   |
| H060B          | All     | Acute coxsackievirus bronchitis                        |
| H060C          | All     | Acute parainfluenza virus bronchitis                   |
| H060D          | All     | Acute respiratory syncytial virus bronchitis           |
| H060E          | All     | Acute bronchitis due to rhinovirus                     |
| H060F          | All     | Acute echovirus bronchitis                             |
| H060v          | All     | Subacute bronchitis unspecified                        |
| H060w          | All     | Acute viral bronchitis unspecified                     |
| H060x          | All     | Acute bacterial bronchitis unspecified                 |
| H060z          | All     | Acute bronchitis NOS                                   |
| H061.          | All     | Acute bronchiolitis                                    |
| H0610          | All     | Acute capillary bronchiolitis                          |
| H0611          | All     | Acute obliterating bronchiolitis                       |
| H0612          | All     | Acute bronchiolitis with bronchospasm                  |
| H0613          | All     | Acute exudative bronchiolitis                          |
| H0614          | All     | Obliterating fibrous bronchiolitis                     |
| H0615          | All     | Acute bronchiolitis due to respiratory syncytial virus |
| H0616          | All     | Acute bronchiolitis due to other specified organisms   |
| H0617          | All     | NULL                                                   |
| H061z          | All     | Acute bronchiolitis NOS                                |
| H062.          | All     | NULL                                                   |

|       |     |                                                                     |
|-------|-----|---------------------------------------------------------------------|
| H06z. | All | Acute bronchitis or bronchiolitis NOS                               |
| H06z0 | All | Chest infection (& NOS)                                             |
| H06z1 | All | Respiratory tract infection (& [acute lower] or [lower])            |
| H06z2 | All | NULL                                                                |
| H243. | All | Pertussis pneumonia                                                 |
| H30.. | All | Bronchitis: [unspecified (& chest infection)] or [recurrent wheezy] |
| H300. | All | Tracheobronchitis NOS                                               |
| H301. | All | Laryngotracheobronchitis                                            |
| H302. | All | NULL                                                                |
| H30z. | All | Bronchitis NOS                                                      |
| Hyu10 | All | [X]Acute bronchitis due to other specified organisms                |
| Hyu11 | All | [X]Acute bronchiolitis due to other specified organisms             |
| X1006 | All | Chest infection - unspecified bronchitis                            |
| X1007 | All | Acute bacterial bronchitis                                          |
| X1009 | All | Acute mycoplasmal bronchitis                                        |
| X100A | All | Acute chlamydial bronchitis                                         |
| X100B | All | Acute viral bronchitis                                              |
| X100C | All | Acute viral bronchiolitis                                           |
| X100D | All | Acute bronchiolitis due to adenovirus                               |
| Xa0IW | All | Acute laryngotracheobronchitis                                      |
| Xa0IZ | All | Asthmatic bronchitis                                                |
| XaDtB | All | Acute infective bronchitis                                          |
| XaDth | All | Acute infective tracheobronchitis                                   |
| XaYYt | All | Acute bronchiolitis due to human metapneumovirus                    |
| XE0Qw | All | Whooping cough                                                      |
| XE0Xr | All | Acute bronchitis                                                    |
| XE0YL | All | Bronchitis unspecified                                              |
| XE0Yt | All | Acute: [bronchitis] or [chest infections] or [tracheobronchitis]    |
| XM1QT | All | Acute fibrinous laryngotracheobronchitis                            |
| XM1QX | All | Acute wheezy bronchitis                                             |

**Supplementary table S5.3.** The case definitions for included Pneumonia and Pneumonitis.

| Pneumonia and Pneumonitis |         |                                                       |
|---------------------------|---------|-------------------------------------------------------|
| Read V2 Code              | Term ID | Description                                           |
| H20..                     | All     | Viral pneumonia                                       |
| H200.                     | All     | Pneumonia due to adenovirus                           |
| H201.                     | All     | Pneumonia due to respiratory syncytial virus          |
| H202.                     | All     | Pneumonia due to parainfluenza virus                  |
| H203.                     | All     | Pneumonia due to human metapneumovirus                |
| H20y.                     | All     | Viral pneumonia NEC                                   |
| H20y0                     | All     | Severe acute respiratory syndrome                     |
| H20z.                     | All     | Viral pneumonia NOS                                   |
| H21..                     | All     | Lobar (pneumococcal) pneumonia                        |
| H22..                     | All     | Other bacterial pneumonia                             |
| H220.                     | All     | Pneumonia due to klebsiella pneumoniae                |
| H221.                     | All     | Pneumonia due to pseudomonas                          |
| H222.                     | All     | Pneumonia due to haemophilus influenzae               |
| H223.                     | All     | Pneumonia due to streptococcus                        |
| H2230                     | All     | Pneumonia due to streptococcus, group B               |
| H224.                     | All     | Pneumonia due to staphylococcus                       |
| H22y.                     | All     | Pneumonia due to other specified bacteria             |
| H22y0                     | All     | Pneumonia due to escherichia coli                     |
| H22y1                     | All     | Pneumonia due to proteus                              |
| H22y2                     | All     | Pneumonia - Legionella                                |
| H22y3                     | All     | Pneumonia due to Gram negative bacteria               |
| H22yX                     | All     | Pneumonia due to other aerobic gram-negative bacteria |
| H22yz                     | All     | Pneumonia due to bacteria NOS                         |
| H22z.                     | All     | Bacterial pneumonia NOS                               |
| H23..                     | All     | Pneumonia due to other specified organisms            |
| H230.                     | All     | Pneumonia due to Eaton's agent                        |
| H231.                     | All     | Pneumonia due to mycoplasma pneumoniae                |
| H232.                     | All     | Pneumonia due to pleuropneumonia like organisms       |
| H233.                     | All     | Chlamydial pneumonia                                  |
| H23z.                     | All     | Pneumonia due to specified organism NOS               |
| H24..                     | All     | Pneumonia with infectious diseases EC                 |
| H240.                     | All     | Pneumonia with measles                                |
| H241.                     | All     | Pneumonia with cytomegalic inclusion disease          |
| H242.                     | All     | Pneumonia with ornithosis                             |
| H243.                     | All     | Pneumonia with whooping cough                         |
| H244.                     | All     | Pneumonia with tularaemia                             |
| H245.                     | All     | Pneumonia with anthrax                                |
| H246.                     | All     | Pneumonia with aspergillosis                          |
| H247.                     | All     | Pneumonia with other systemic mycoses                 |



|                       |                |                                                 |
|-----------------------|----------------|-------------------------------------------------|
| H2470                 | All            | Pneumonia with candidiasis                      |
| H2471                 | All            | Pneumonia with coccidioidomycosis               |
| H2472                 | All            | Pneumonia with histoplasmosis                   |
| H247z                 | All            | Pneumonia with systemic mycosis NOS             |
| H24y.                 | All            | Pneumonia with other infectious diseases EC     |
| H24y0                 | All            | Pneumonia with actinomycosis                    |
| H24y1                 | All            | Pneumonia with nocardiasis                      |
| H24y2                 | All            | Pneumonia with pneumocystis carinii             |
| H24y3                 | All            | Pneumonia with Q-fever                          |
| H24y4                 | All            | Pneumonia with salmonellosis                    |
| H24y5                 | All            | Pneumonia with toxoplasmosis                    |
| H24y6                 | All            | Pneumonia with typhoid fever                    |
| H24y7                 | All            | Pneumonia with varicella                        |
| H24yz                 | All            | Pneumonia with other infectious diseases EC NOS |
| H24z.                 | All            | Pneumonia with infectious diseases EC NOS       |
| H25..                 | All            | Bronchopneumonia due to unspecified organism    |
| H26..                 | All            | Pneumonia due to unspecified organism           |
| H260.                 | All            | Lobar pneumonia due to unspecified organism     |
| H2600                 | All            | Lung consolidation                              |
| H261.                 | All            | Basal pneumonia due to unspecified organism     |
| H262.                 | All            | Postoperative pneumonia                         |
| H263.                 | All            | Pneumonitis, unspecified                        |
| H28..                 | All            | Atypical pneumonia                              |
| <b>Read CTV3 Code</b> | <b>Term ID</b> | <b>Description</b>                              |
| H20..                 | All            | Viral pneumonia (& chest infection)             |
| H200.                 | All            | Adenoviral pneumonia                            |
| H201.                 | All            | Pneumonia due to respiratory syncytial virus    |
| H202.                 | All            | Parainfluenzal pneumonia                        |
| H203.                 | All            | NULL                                            |
| H20y.                 | All            | Viral pneumonia NEC                             |
| H20y0                 | All            | NULL                                            |
| H20z.                 | All            | Viral pneumonia NOS                             |
| H21..                 | All            | Pneumococcal pneumonia (& lobar)                |
| H22..                 | All            | Other bacterial pneumonia                       |
| H220.                 | All            | Pneumonia due to Klebsiella pneumoniae          |
| H221.                 | All            | Pseudomonal pneumonia                           |
| H222.                 | All            | Haemophilus influenzae pneumonia                |
| H223.                 | All            | Streptococcal pneumonia                         |
| H2230                 | All            | Group B streptococcal pneumonia                 |
| H224.                 | All            | Staphylococcal pneumonia                        |
| H22y.                 | All            | Pneumonia due to other specified bacteria       |
| H22y0                 | All            | Escherichia coli pneumonia                      |
| H22y1                 | All            | Proteus pneumonia                               |
| H22y2                 | All            | Legionella pneumonia                            |

|       |     |                                                                             |
|-------|-----|-----------------------------------------------------------------------------|
| H22y3 | All | NULL                                                                        |
| H22yX | All | NULL                                                                        |
| H22yz | All | Pneumonia due to bacteria NOS                                               |
| H22z. | All | Bacterial pneumonia NOS                                                     |
| H23.. | All | Pneumonia due to other specified organisms                                  |
| H230. | All | NULL                                                                        |
| H231. | All | NULL                                                                        |
| H232. | All | Pneumonia due to pleuropneumonia-like organism                              |
| H233. | All | NULL                                                                        |
| H23z. | All | Pneumonia due to specified organism NOS                                     |
| H24.. | All | (Pneumonia) or (chest infection) with infectious diseases EC                |
| H240. | All | Measles pneumonia                                                           |
| H241. | All | Cytomegalovirus pneumonia                                                   |
| H242. | All | Ornithosis with pneumonia                                                   |
| H243. | All | Pertussis pneumonia                                                         |
| H244. | All | Tularaemia pneumonia                                                        |
| H245. | All | Anthrax pneumonia                                                           |
| H246. | All | Pneumonia with aspergillosis                                                |
| H247. | All | Pneumonia with other systemic mycoses                                       |
| H2470 | All | Candidal pneumonia                                                          |
| H2471 | All | Pneumonia with coccidioidomycosis                                           |
| H2472 | All | Pneumonia with histoplasmosis                                               |
| H247z | All | Pneumonia with systemic mycosis NOS                                         |
| H24y. | All | Pneumonia with other infectious diseases EC                                 |
| H24y0 | All | Actinomycotic pneumonia                                                     |
| H24y1 | All | Nocardial pneumonia                                                         |
| H24y2 | All | Pneumocystis carinii pneumonia                                              |
| H24y3 | All | Q fever pneumonia                                                           |
| H24y4 | All | NULL                                                                        |
| H24y5 | All | Toxoplasma pneumonia                                                        |
| H24y6 | All | Typhoid pneumonia                                                           |
| H24y7 | All | Chickenpox pneumonia                                                        |
| H24yz | All | Pneumonia with other infectious diseases EC NOS                             |
| H24z. | All | Pneumonia with infectious diseases EC NOS                                   |
| H25.. | All | Bronchopneumonia: [unspecified organism] or [chest infection - unspecified] |
| H26.. | All | Pneumonia due to unspecified organism                                       |
| H260. | All | Lobar pneumonia due to unspecified organism                                 |
| H2600 | All | NULL                                                                        |
| H261. | All | NULL                                                                        |
| H262. | All | NULL                                                                        |
| H263. | All | NULL                                                                        |
| H28.. | All | NULL                                                                        |
| X100h | All | Giant cell pneumonia                                                        |
| XaBE9 | All | Basal pneumonia due to unspecified organism                                 |
| XaDtl | All | Legionnaire's disease                                                       |

|       |     |                                              |
|-------|-----|----------------------------------------------|
| XEOYJ | All | Bronchopneumonia due to unspecified organism |
|-------|-----|----------------------------------------------|

For peer review only

**Supplementary table S5.4.** The case definitions for included Acute Bronchitis

| <b>Acute Bronchitis</b> |                |                                                        |
|-------------------------|----------------|--------------------------------------------------------|
| <b>Read V2 Code</b>     | <b>Term ID</b> | <b>Description</b>                                     |
| H06..                   | All            | Acute bronchitis and bronchiolitis                     |
| H060.                   | All            | Acute bronchitis                                       |
| H0600                   | All            | Acute fibrinous bronchitis                             |
| H0601                   | All            | Acute membranous bronchitis                            |
| H0602                   | All            | Acute pseudomembranous bronchitis                      |
| H0603                   | All            | Acute purulent bronchitis                              |
| H0604                   | All            | Acute croupous bronchitis                              |
| H0605                   | All            | Acute tracheobronchitis                                |
| H0606                   | All            | Acute pneumococcal bronchitis                          |
| H0607                   | All            | Acute streptococcal bronchitis                         |
| H0608                   | All            | Acute haemophilus influenzae bronchitis                |
| H0609                   | All            | Acute neisseria catarrhalis bronchitis                 |
| H060A                   | All            | Acute bronchitis due to mycoplasma pneumoniae          |
| H060B                   | All            | Acute bronchitis due to coxsackievirus                 |
| H060C                   | All            | Acute bronchitis due to parainfluenza virus            |
| H060D                   | All            | Acute bronchitis due to respiratory syncytial virus    |
| H060E                   | All            | Acute bronchitis due to rhinovirus                     |
| H060F                   | All            | Acute bronchitis due to echovirus                      |
| H060v                   | All            | Subacute bronchitis unspecified                        |
| H060w                   | All            | Acute viral bronchitis unspecified                     |
| H060x                   | All            | Acute bacterial bronchitis unspecified                 |
| H060z                   | All            | Acute bronchitis NOS                                   |
| H061.                   | All            | Acute bronchiolitis                                    |
| H0610                   | All            | Acute capillary bronchiolitis                          |
| H0611                   | All            | Acute obliterating bronchiolitis                       |
| H0612                   | All            | Acute bronchiolitis with bronchospasm                  |
| H0613                   | All            | Acute exudative bronchiolitis                          |
| H0614                   | All            | Obliterating fibrous bronchiolitis                     |
| H0615                   | All            | Acute bronchiolitis due to respiratory syncytial virus |
| H0616                   | All            | Acute bronchiolitis due to other specified organisms   |
| H0617                   | All            | Acute bronchiolitis due to human metapneumovirus       |
| H061z                   | All            | Acute bronchiolitis NOS                                |
| H062.                   | All            | Acute lower respiratory tract infection                |
| H06z.                   | All            | Acute bronchitis or bronchiolitis NOS                  |
| H06z0                   | All            | Chest infection NOS                                    |
| H06z1                   | All            | Lower resp tract infection                             |
| H06z2                   | All            | Recurrent chest infection                              |
| H30..                   | All            | Bronchitis unspecified                                 |
| H300.                   | All            | Tracheobronchitis NOS                                  |

|                       |                |                                                        |
|-----------------------|----------------|--------------------------------------------------------|
| H301.                 | All            | Laryngotracheobronchitis                               |
| H302.                 | All            | Wheezy bronchitis                                      |
| H30z.                 | All            | Bronchitis NOS                                         |
| <b>Read CTV3 Code</b> | <b>Term ID</b> | <b>Description</b>                                     |
| A33y.                 | All            | Whooping cough - other specified organism              |
| A33yz                 | All            | Other whooping cough NOS                               |
| A33z.                 | All            | Whooping cough NOS                                     |
| Ayu39                 | All            | [X]Whooping cough due to other Bordetella species      |
| Ayu3A                 | All            | [X]Whooping cough, unspecified                         |
| H06..                 | All            | Acute bronchitis and bronchiolitis                     |
| H060.                 | All            | Acute bronchitis (& wheezy)                            |
| H0600                 | All            | Acute fibrinous bronchitis                             |
| H0601                 | All            | Acute membranous bronchitis                            |
| H0602                 | All            | Acute pseudomembranous bronchitis                      |
| H0603                 | All            | Acute purulent bronchitis                              |
| H0604                 | All            | Acute croupous bronchitis                              |
| H0605                 | All            | Acute tracheobronchitis                                |
| H0606                 | All            | Acute pneumococcal bronchitis                          |
| H0607                 | All            | Acute streptococcal bronchitis                         |
| H0608                 | All            | Acute haemophilus influenzae bronchitis                |
| H0609                 | All            | Acute Neisseria catarrhalis bronchitis                 |
| H060A                 | All            | NULL                                                   |
| H060B                 | All            | Acute coxsackievirus bronchitis                        |
| H060C                 | All            | Acute parainfluenza virus bronchitis                   |
| H060D                 | All            | Acute respiratory syncytial virus bronchitis           |
| H060E                 | All            | Acute bronchitis due to rhinovirus                     |
| H060F                 | All            | Acute echovirus bronchitis                             |
| H060v                 | All            | Subacute bronchitis unspecified                        |
| H060w                 | All            | Acute viral bronchitis unspecified                     |
| H060x                 | All            | Acute bacterial bronchitis unspecified                 |
| H060z                 | All            | Acute bronchitis NOS                                   |
| H061.                 | All            | Acute bronchiolitis                                    |
| H0610                 | All            | Acute capillary bronchiolitis                          |
| H0611                 | All            | Acute obliterating bronchiolitis                       |
| H0612                 | All            | Acute bronchiolitis with bronchospasm                  |
| H0613                 | All            | Acute exudative bronchiolitis                          |
| H0614                 | All            | Obliterating fibrous bronchiolitis                     |
| H0615                 | All            | Acute bronchiolitis due to respiratory syncytial virus |
| H0616                 | All            | Acute bronchiolitis due to other specified organisms   |
| H0617                 | All            | NULL                                                   |
| H061z                 | All            | Acute bronchiolitis NOS                                |
| H062.                 | All            | NULL                                                   |

|       |     |                                                                     |
|-------|-----|---------------------------------------------------------------------|
| H06z. | All | Acute bronchitis or bronchiolitis NOS                               |
| H06z0 | All | Chest infection (& NOS)                                             |
| H06z1 | All | Respiratory tract infection (& [acute lower] or [lower])            |
| H06z2 | All | NULL                                                                |
| H243. | All | Pertussis pneumonia                                                 |
| H30.. | All | Bronchitis: [unspecified (& chest infection)] or [recurrent wheezy] |
| H300. | All | Tracheobronchitis NOS                                               |
| H301. | All | Laryngotracheobronchitis                                            |
| H302. | All | NULL                                                                |
| H30z. | All | Bronchitis NOS                                                      |
| Hyu10 | All | [X]Acute bronchitis due to other specified organisms                |
| Hyu11 | All | [X]Acute bronchiolitis due to other specified organisms             |
| X1006 | All | Chest infection - unspecified bronchitis                            |
| X1007 | All | Acute bacterial bronchitis                                          |
| X1009 | All | Acute mycoplasmal bronchitis                                        |
| X100A | All | Acute chlamydial bronchitis                                         |
| X100B | All | Acute viral bronchitis                                              |
| X100C | All | Acute viral bronchiolitis                                           |
| X100D | All | Acute bronchiolitis due to adenovirus                               |
| Xa0IW | All | Acute laryngotracheobronchitis                                      |
| Xa0IZ | All | Asthmatic bronchitis                                                |
| XaDtB | All | Acute infective bronchitis                                          |
| XaDth | All | Acute infective tracheobronchitis                                   |
| XaYYt | All | Acute bronchiolitis due to human metapneumovirus                    |
| XE0Qw | All | Whooping cough                                                      |
| XE0Xr | All | Acute bronchitis                                                    |
| XE0YL | All | Bronchitis unspecified                                              |
| XE0Yt | All | Acute: [bronchitis] or [chest infections] or [tracheobronchitis]    |
| XM1QT | All | Acute fibrinous laryngotracheobronchitis                            |
| XM1QX | All | Acute wheezy bronchitis                                             |

**Supplementary table S5.5.** The case definitions for included influenza and cases of influenza-like illness.

| <b>Influenza</b>      |                |                                                                                |
|-----------------------|----------------|--------------------------------------------------------------------------------|
| <b>Read V2 Code</b>   | <b>Term ID</b> | <b>Description</b>                                                             |
| 16L..                 | All            | Influenza-like symptoms                                                        |
| H27..                 | All            | Influenza                                                                      |
| H270.                 | All            | Influenza with pneumonia                                                       |
| H2700                 | All            | Influenza with bronchopneumonia                                                |
| H2701                 | All            | Influenza with pneumonia, influenza virus identified                           |
| H270z                 | All            | Influenza with pneumonia NOS                                                   |
| H271.                 | All            | Influenza with other respiratory manifestation                                 |
| H2710                 | All            | Influenza with laryngitis                                                      |
| H2711                 | All            | Influenza with pharyngitis                                                     |
| H271z                 | All            | Influenza with respiratory manifestations NOS                                  |
| H27y.                 | All            | Influenza with other manifestations                                            |
| H27y0                 | All            | Influenza with encephalopathy                                                  |
| H27y1                 | All            | Influenza with gastrointestinal tract involvement                              |
| H27yz                 | All            | Influenza with other manifestations NOS                                        |
| H27z.                 | All            | Influenza NOS                                                                  |
| H2A..                 | All            | Influenza due to Influenza A virus subtype H1N1                                |
| <b>Read CTV3 Code</b> | <b>Term ID</b> | <b>Description</b>                                                             |
| 16L..                 | All            | NULL                                                                           |
| G5203                 | All            | Acute myocarditis - influenzal                                                 |
| H27..                 | All            | Influenza                                                                      |
| H270.                 | All            | Influenzal pneumonia                                                           |
| H2700                 | All            | Influenza with bronchopneumonia                                                |
| H2701                 | All            | Influenza with pneumonia, influenza virus identified                           |
| H270z                 | All            | Influenza with pneumonia NOS                                                   |
| H271.                 | All            | Influenza with other respiratory manifestation                                 |
| H2710                 | All            | Influenza with laryngitis                                                      |
| H2711                 | All            | Influenza with pharyngitis                                                     |
| H271z                 | All            | Influenza with respiratory manifestations NOS                                  |
| H27y.                 | All            | Influenza with other manifestations                                            |
| H27y0                 | All            | Influenza with encephalopathy                                                  |
| H27y1                 | All            | Influenza with gastrointestinal tract involvement                              |
| H27yz                 | All            | Influenza with other manifestations NOS                                        |
| H27z.                 | All            | (Influenza like illness) or (influenza NOS)                                    |
| H2A..                 | All            | NULL                                                                           |
| Hyu04                 | All            | [X]Influenza with other respiratory manifestations, influenza virus identified |
| Hyu05                 | All            | [X]Influenza with other manifestations, influenza virus identified             |



|       |     |                                                                          |
|-------|-----|--------------------------------------------------------------------------|
| Hyu06 | All | [X]Influenza with other respiratory manifestations, virus not identified |
| Hyu07 | All | [X]Influenza with other manifestations, virus not identified             |
| XaC1s | All | Encephalitis due to influenza                                            |
| XaC2H | All | Encephalitis due to influenza-virus identified                           |
| XaEGX | All | Encephalitis due to influenza-specific virus not identified              |
| XaeVK | All | Influenza due to zoonotic influenza virus                                |
| XaeVL | All | Influenza due to pandemic influenza virus                                |
| XaeVM | All | Influenza due to seasonal influenza virus                                |
| XaeVN | All | Influenza with pneumonia due to seasonal influenza virus                 |
| XaIBK | All | Influenza-like symptoms                                                  |
| XaMih | All | Avian influenza                                                          |
| XaQQp | All | Influenza due to Influenza A virus subtype H1N1                          |
| XEOYK | All | Influenza NOS                                                            |
| XEOZJ | All | (Influenza NOS) or (influenza-like illness)                              |
| XM0rz | All | Influenza-like illness                                                   |
| XM0s0 | All | Flu-like illness NOS                                                     |

**Supplementary table S5.6.** The case definitions for included Skin infections.

| <b>Skin infections</b> |                |                                         |
|------------------------|----------------|-----------------------------------------|
| <b>Read V2 Code</b>    | <b>Term ID</b> | <b>Description</b>                      |
| M0...                  | All            | Skin and subcutaneous tissue infections |
| M00..                  | All            | Carbuncle                               |
| M000.                  | All            | Carbuncle of face                       |
| M0000                  | All            | Carbuncle of ear                        |
| M0001                  | All            | Carbuncle of face (excluding eye)       |
| M0002                  | All            | Carbuncle of nasal septum               |
| M0003                  | All            | Carbuncle of temple region              |
| M000z                  | All            | Carbuncle of face NOS                   |
| M001.                  | All            | Carbuncle of neck                       |
| M002.                  | All            | Carbuncle of trunk                      |
| M0020                  | All            | Carbuncle of chest wall                 |
| M0021                  | All            | Carbuncle of breast                     |
| M0022                  | All            | Carbuncle of back                       |
| M0023                  | All            | Carbuncle of abdominal wall             |
| M0024                  | All            | Carbuncle of umbilicus                  |
| M0025                  | All            | Carbuncle of flank                      |
| M0026                  | All            | Carbuncle of groin                      |
| M0027                  | All            | Carbuncle of perineum                   |
| M002z                  | All            | Carbuncle of trunk NOS                  |
| M003.                  | All            | Carbuncle of upper arm and forearm      |
| M0030                  | All            | Carbuncle of shoulder                   |
| M0031                  | All            | Carbuncle of axilla                     |
| M0032                  | All            | Carbuncle of upper arm                  |
| M0033                  | All            | Carbuncle of elbow                      |
| M0034                  | All            | Carbuncle of forearm                    |
| M003z                  | All            | Carbuncle of upper arm and forearm NOS  |
| M004.                  | All            | Carbuncle of hand                       |
| M0040                  | All            | Carbuncle of wrist                      |
| M0041                  | All            | Carbuncle of thumb                      |
| M0042                  | All            | Carbuncle of finger                     |
| M004z                  | All            | Carbuncle of hand NOS                   |
| M005.                  | All            | Carbuncle of buttock                    |
| M0050                  | All            | Carbuncle of anus                       |
| M0051                  | All            | Carbuncle of gluteal region             |
| M005z                  | All            | Carbuncle of buttock NOS                |
| M006.                  | All            | Carbuncle of leg (excluding foot)       |
| M0060                  | All            | Carbuncle of hip                        |
| M0061                  | All            | Carbuncle of thigh                      |
| M0062                  | All            | Carbuncle of knee                       |

|    |       |     |                                       |
|----|-------|-----|---------------------------------------|
| 1  |       |     |                                       |
| 2  |       |     |                                       |
| 3  |       |     |                                       |
| 4  | M0063 | All | Carbuncle of lower leg                |
| 5  | M0064 | All | Carbuncle of ankle                    |
| 6  | M006z | All | Carbuncle of leg (excluding foot) NOS |
| 7  | M007. | All | Carbuncle of foot                     |
| 8  |       |     |                                       |
| 9  | M0070 | All | Carbuncle of foot unspecified         |
| 10 | M0071 | All | Carbuncle of heel                     |
| 11 |       |     |                                       |
| 12 | M0072 | All | Carbuncle of toe                      |
| 13 | M007z | All | Carbuncle of foot NOS                 |
| 14 | M00y. | All | Carbuncle of other specified site     |
| 15 |       |     |                                       |
| 16 | M00y0 | All | Carbuncle of head (excluding face)    |
| 17 | M00yz | All | Carbuncle of other specified site NOS |
| 18 | M00z. | All | Carbuncle NOS                         |
| 19 |       |     |                                       |
| 20 | M01.. | All | Furuncle - boil                       |
| 21 | M010. | All | Boil of face                          |
| 22 |       |     |                                       |
| 23 | M0100 | All | Boil of ear                           |
| 24 | M0101 | All | Boil of face (excluding eye)          |
| 25 | M0102 | All | Boil of nasal septum                  |
| 26 | M0103 | All | Boil of temple region                 |
| 27 |       |     |                                       |
| 28 | M0104 | All | Boil of external nose                 |
| 29 | M010z | All | Boil of face NOS                      |
| 30 | M011. | All | Boil of neck                          |
| 31 |       |     |                                       |
| 32 | M012. | All | Boil of trunk                         |
| 33 |       |     |                                       |
| 34 | M0120 | All | Boil of chest wall                    |
| 35 | M0121 | All | Boil of breast                        |
| 36 | M0122 | All | Boil of back                          |
| 37 | M0123 | All | Boil of abdominal wall                |
| 38 |       |     |                                       |
| 39 | M0124 | All | Boil of umbilicus                     |
| 40 | M0125 | All | Boil of flank                         |
| 41 | M0126 | All | Boil of groin                         |
| 42 |       |     |                                       |
| 43 | M0127 | All | Boil of perineum                      |
| 44 | M012z | All | Boil of trunk NOS                     |
| 45 | M013. | All | Boil of upper arm and forearm         |
| 46 |       |     |                                       |
| 47 | M0130 | All | Boil of shoulder                      |
| 48 | M0131 | All | Boil of axilla                        |
| 49 | M0132 | All | Boil of upper arm                     |
| 50 |       |     |                                       |
| 51 | M0133 | All | Boil of elbow                         |
| 52 | M0134 | All | Boil of forearm                       |
| 53 |       |     |                                       |
| 54 | M013z | All | Boil of upper arm and forearm NOS     |
| 55 | M014. | All | Boil of hand                          |
| 56 | M0140 | All | Boil of wrist                         |
| 57 | M0141 | All | Boil of thumb                         |
| 58 |       |     |                                       |
| 59 | M0142 | All | Boil of finger                        |
| 60 |       |     |                                       |

|       |     |                                              |
|-------|-----|----------------------------------------------|
| M014z | All | Boil of hand NOS                             |
| M015. | All | Boil of buttock                              |
| M0150 | All | Boil of anus                                 |
| M0151 | All | Boil of gluteal region                       |
| M015z | All | Boil of buttock NOS                          |
| M016. | All | Boil of leg (excluding foot)                 |
| M0160 | All | Boil of hip                                  |
| M0161 | All | Boil of thigh                                |
| M0162 | All | Boil of knee                                 |
| M0163 | All | Boil of lower leg                            |
| M0164 | All | Boil of ankle                                |
| M016z | All | Boil of leg (excluding foot) NOS             |
| M017. | All | Boil of foot                                 |
| M0170 | All | Boil of foot unspecified                     |
| M0171 | All | Boil of heel                                 |
| M0172 | All | Boil of toe                                  |
| M017z | All | Boil of foot NOS                             |
| M01y. | All | Boil of other specified site                 |
| M01y0 | All | Boil of head (excluding face)                |
| M01yz | All | Boil of other specified site NOS             |
| M01z. | All | Boil NOS                                     |
| M01z0 | All | Multiple boils                               |
| M02.. | All | Cellulitis and abscess of finger and toe     |
| M020. | All | Cellulitis and abscess of finger             |
| M0200 | All | Cellulitis and abscess of finger unspecified |
| M0201 | All | Finger pulp abscess                          |
| M0202 | All | Onychia of finger                            |
| M0203 | All | Paronychia of finger                         |
| M0204 | All | Finger web space infection                   |
| M0205 | All | Pulp space infection of finger/thumb         |
| M020z | All | Cellulitis and abscess of finger NOS         |
| M021. | All | Cellulitis and abscess of toe                |
| M0210 | All | Cellulitis and abscess of toe unspecified    |
| M0211 | All | Onychia of toe                               |
| M0212 | All | Paronychia of toe                            |
| M0213 | All | Pulp space infection of toe                  |
| M021z | All | Cellulitis and abscess of toe NOS            |
| M02z. | All | Cellulitis and abscess of digit NOS          |
| M03.. | All | Other cellulitis and abscess                 |
| M030. | All | Cellulitis and abscess of face               |
| M0300 | All | Cellulitis and abscess of cheek (external)   |
| M0301 | All | Cellulitis and abscess of nose (external)    |

|       |     |                                                 |
|-------|-----|-------------------------------------------------|
| M0302 | All | Cellulitis and abscess of chin                  |
| M0303 | All | Cellulitis and abscess of submandibular region  |
| M0304 | All | Cellulitis and abscess of forehead              |
| M0305 | All | Cellulitis and abscess of temple region         |
| M0306 | All | Cellulitis of face                              |
| M030z | All | Cellulitis and abscess of face NOS              |
| M031. | All | Cellulitis and abscess of neck                  |
| M032. | All | Cellulitis and abscess of trunk                 |
| M0320 | All | Cellulitis and abscess of chest wall            |
| M0321 | All | Cellulitis and abscess of breast                |
| M0322 | All | Cellulitis and abscess of back                  |
| M0323 | All | Cellulitis and abscess of abdominal wall        |
| M0324 | All | Cellulitis and abscess of umbilicus             |
| M0325 | All | Cellulitis and abscess of flank                 |
| M0326 | All | Cellulitis and abscess of groin                 |
| M0327 | All | Cellulitis and abscess of perineum              |
| M0328 | All | Cellulitis of trunk                             |
| M032z | All | Cellulitis and abscess of trunk NOS             |
| M033. | All | Cellulitis and abscess of arm                   |
| M0330 | All | Cellulitis and abscess of shoulder              |
| M0331 | All | Cellulitis and abscess of axilla                |
| M0332 | All | Cellulitis and abscess of upper arm             |
| M0333 | All | Cellulitis and abscess of elbow                 |
| M0334 | All | Cellulitis and abscess of forearm               |
| M033z | All | Cellulitis and abscess of arm NOS               |
| M034. | All | Cellulitis and abscess of hand excluding digits |
| M0340 | All | Cellulitis and abscess of hand unspecified      |
| M0341 | All | Cellulitis and abscess of wrist                 |
| M034z | All | Cellulitis and abscess of hand NOS              |
| M035. | All | Cellulitis and abscess of buttock               |
| M036. | All | Cellulitis and abscess of leg excluding foot    |
| M0360 | All | Cellulitis and abscess of hip                   |
| M0361 | All | Cellulitis and abscess of thigh                 |
| M0362 | All | Cellulitis and abscess of knee                  |
| M0363 | All | Cellulitis and abscess of lower leg             |
| M0364 | All | Cellulitis and abscess of ankle                 |
| M036z | All | Cellulitis and abscess of leg NOS               |
| M037. | All | Cellulitis and abscess of foot excluding toe    |
| M0370 | All | Cellulitis and abscess of foot unspecified      |
| M0371 | All | Cellulitis and abscess of heel                  |
| M0372 | All | Cellulitis in diabetic foot                     |
| M037z | All | Cellulitis and abscess of foot NOS              |

|       |     |                                                        |
|-------|-----|--------------------------------------------------------|
| M038. | All | Cellulitis of external ear                             |
| M03y. | All | Other specified cellulitis and abscess                 |
| M03y0 | All | Cellulitis and abscess of head unspecified             |
| M03z. | All | Cellulitis and abscess NOS                             |
| M03z0 | All | Cellulitis NOS                                         |
| M03z1 | All | Abscess NOS                                            |
| M03zz | All | Cellulitis and abscess NOS                             |
| M04.. | All | Acute lymphadenitis                                    |
| M040. | All | Acute lymphadenitis of trunk                           |
| M041. | All | Acute lymphadenitis of upper limb                      |
| M042. | All | Acute lymphadenitis of lower limb                      |
| M043. | All | Acute lymphadenitis of face, head and neck             |
| M05.. | All | Impetigo                                               |
| M050. | All | Impetigo contagiosa unspecified                        |
| M051. | All | Impetigo contagiosa bullosa                            |
| M052. | All | Impetigo contagiosa gyrata                             |
| M053. | All | Impetigo circinata                                     |
| M054. | All | Impetigo neonatorum                                    |
| M055. | All | Impetigo simplex                                       |
| M056. | All | Impetigo follicularis                                  |
| M057. | All | Chronic symmetrical impetigo                           |
| M05z. | All | Impetigo NOS                                           |
| M06.. | All | Pilonidal sinus/cyst                                   |
| M060. | All | Pilonidal cyst with abscess                            |
| M061. | All | Pilonidal cyst with no abscess                         |
| M062. | All | Pilonidal sinus with abscess                           |
| M063. | All | Pilonidal sinus without abscess                        |
| M06z. | All | Pilonidal sinus/cyst NOS                               |
| M07.. | All | Other local infections of skin and subcutaneous tissue |
| M070. | All | Pyoderma                                               |
| M0700 | All | Pyoderma chancriforme                                  |
| M0701 | All | Pyoderma faciale                                       |
| M0702 | All | Pyoderma gangrenosum                                   |
| M0703 | All | Pyoderma ulcerosum tropicalum                          |
| M070z | All | Pyoderma NOS                                           |
| M071. | All | Pyogenic granuloma                                     |
| M0710 | All | Pyogenic granuloma unspecified                         |
| M0711 | All | Pyogenic progressive granuloma                         |
| M0712 | All | Granuloma telangiectaticum                             |
| M0713 | All | Umbilical granuloma                                    |
| M071z | All | Pyogenic granuloma NOS                                 |
| M072. | All | Erythrasma                                             |

|    |       |                                                                         |
|----|-------|-------------------------------------------------------------------------|
| 1  |       |                                                                         |
| 2  |       |                                                                         |
| 3  |       |                                                                         |
| 4  | M073. | All Scalp infection                                                     |
| 5  | M07y. | All Other specified local infection of skin or subcutaneous tissue      |
| 6  | M07y0 | All Pustular bacterid                                                   |
| 7  | M07y1 | All Ecthyma                                                             |
| 8  | M07y2 | All Dermatitis vegetans                                                 |
| 9  | M07y3 | All Perleche                                                            |
| 10 | M07y4 | All Pitted keratolysis                                                  |
| 11 | M07y5 | All Inflammation of scar                                                |
| 12 | M07yz | All Other specified local infection of skin and subcutaneous tissue NOS |
| 13 | M07z. | All Local infection skin/subcut tissue NOS                              |
| 14 | M07z0 | All Infection foot                                                      |
| 15 | M07z1 | All Infection toe                                                       |
| 16 | M07z2 | All Infection finger                                                    |
| 17 | M08.. | All Cutaneous cellulitis                                                |
| 18 | M080. | All [X]Cellulitis of finger and toe                                     |
| 19 | M081. | All [X]Cellulitis of other parts of limb                                |
| 20 | M082. | All Cellulitis of face                                                  |
| 21 | M083. | All Cellulitis of trunk                                                 |
| 22 | M084. | All [X]Cellulitis of breast                                             |
| 23 | M085. | All Cellulitis of leg                                                   |
| 24 | M086. | All Cellulitis of ankle                                                 |
| 25 | M087. | All Chronic paronychia                                                  |
| 26 | M088. | All Cellulitis of arm                                                   |
| 27 | M089. | All Cellulitis of neck                                                  |
| 28 | M08A. | All Cellulitis of axilla                                                |
| 29 | M08B. | All Cellulitis of foot                                                  |
| 30 | M08C. | All Cellulitis of toe                                                   |
| 31 | M08y. | All [X]Cellulitis of other sites                                        |
| 32 | M09.. | All Cutaneous abscess                                                   |
| 33 | M090. | All [X]Abscess of face                                                  |
| 34 | M091. | All [X]Abscess of neck                                                  |
| 35 | M092. | All [X]Abscess of trunk                                                 |
| 36 | M0920 | All [X]Abscess of buttock                                               |
| 37 | M0921 | All [X]Abdominal wall abscess                                           |
| 38 | M0922 | All [X]Perineal abscess                                                 |
| 39 | M093. | All [X]Abscess of buttock                                               |
| 40 | M094. | All [X]Abscess of limb                                                  |
| 41 | M0940 | All [X]Abscess of axilla                                                |
| 42 | M095. | All Skin abscess                                                        |
| 43 | M09y. | All [X]Abscess of other site                                            |
| 44 | M0y.. | All Other specified infections of skin or subcutaneous tissue           |
| 45 | M0z.. | All Skin and subcut tissue infection NOS                                |
| 46 |       |                                                                         |
| 47 |       |                                                                         |
| 48 |       |                                                                         |
| 49 |       |                                                                         |
| 50 |       |                                                                         |
| 51 |       |                                                                         |
| 52 |       |                                                                         |
| 53 |       |                                                                         |
| 54 |       |                                                                         |
| 55 |       |                                                                         |
| 56 |       |                                                                         |
| 57 |       |                                                                         |
| 58 |       |                                                                         |
| 59 |       |                                                                         |
| 60 |       |                                                                         |



| Read CTV3 Code | Term ID | Description                                                                   |
|----------------|---------|-------------------------------------------------------------------------------|
| A056.          | All     | Amoebic ulcer of skin                                                         |
| A05y1          | All     | Amoebic balanitis                                                             |
| A170.          | All     | Tuberculosis of skin & subcutaneous tissue (& tuberculous lupus)              |
| A1700          | All     | Lupus vulgaris                                                                |
| A1702          | All     | Scrofuloderma                                                                 |
| A1703          | All     | Tuberculosis - lupus NOS                                                      |
| A1706          | All     | Lichen scrofulosorum                                                          |
| A1707          | All     | Tuberculosis papulonecrotica                                                  |
| A1708          | All     | Tuberculosis verrucosa cutis                                                  |
| A170z          | All     | Tuberculosis of skin and subcutaneous tissue NOS                              |
| A171.          | All     | Tuberculous erythema nodosum                                                  |
| A1710          | All     | Erythema induratum                                                            |
| A171z          | All     | Erythema nodosum with tuberculosis NOS                                        |
| A201.          | All     | Cutaneous plague                                                              |
| A210.          | All     | Ulceroglandular tularaemia                                                    |
| A390.          | All     | (Cutaneous actinomycosis) or (erythrasma) or (trichomycosis axillaris)        |
| A394.          | All     | Madura foot - actinomycotic                                                   |
| A39z0          | All     | Maduromycosis NOS                                                             |
| A5320          | All     | Herpes zoster with dermatitis of eyelid                                       |
| A540.          | All     | Eczema herpeticum                                                             |
| A5441          | All     | Herpes simplex eyelid dermatitis                                              |
| A546.          | All     | Herpes simplex whitlow                                                        |
| A781.          | All     | Warts: [viral] or [verrucae]                                                  |
| A7810          | All     | Verruca vulgaris                                                              |
| A7811          | All     | Plantar wart                                                                  |
| A7812          | All     | (Warts: [genital] or [penile] or [venereal]) or (condylomata acuminatum)      |
| A7813          | All     | Warts: [perianal] or [anal]                                                   |
| A781z          | All     | Unspecified viral warts                                                       |
| A783.          | All     | Cat scratch disease                                                           |
| A990.          | All     | (Chancroid [& bubo]) or (Ducrey's chancre)                                    |
| A992.          | All     | (Granuloma inguinale) or (donovanosis) or (pudendal ulcer)                    |
| AA22.          | All     | Other early yaws skin lesions                                                 |
| AA23.          | All     | (Yaws hyperkeratosis) or (ghoul hand) or (wormeaten soles)                    |
| AB0..          | All     | (Dermatophytosis &/or tinea &/or ringworm) or (skin fungal infection)         |
| AB00.          | All     | (Dermatophytosis of scalp or beard) or (Kerion)                               |
| AB000          | All     | Scalp ringworm                                                                |
| AB001          | All     | Dermatophytosis of beard                                                      |
| AB00z          | All     | Dermatophytosis of scalp or beard NOS                                         |
| AB02.          | All     | Dermatophytosis of hand                                                       |
| AB03.          | All     | (Dermatophytosis of groin & perianal area) or (Dhobie itch) or (tinea cruris) |
| AB030          | All     | Dermatophytosis of groin                                                      |

|    |       |     |                                                                            |
|----|-------|-----|----------------------------------------------------------------------------|
| 1  |       |     |                                                                            |
| 2  |       |     |                                                                            |
| 3  |       |     |                                                                            |
| 4  | AB031 | All | Dermatophytosis of the perianal area                                       |
| 5  | AB03z | All | Dermatophytosis of groin and perianal area NOS                             |
| 6  | AB04. | All | Dermatophytosis of foot (& tinea pedis)                                    |
| 7  | AB05. | All | (Dermatophytosis of the body) or (herpes circinatus) or (tinea corporis)   |
| 8  |       |     | (Deep seated dermatophytosis) or (granuloma: [trichophyticum] or           |
| 9  | AB06. | All | [Majocchi's])                                                              |
| 10 | AB0y. | All | Other specified dermatophytosis                                            |
| 11 | AB0z. | All | Dermatophytosis NOS                                                        |
| 12 | AB1.. | All | Dermatophytosis other and unspecified                                      |
| 13 | AB10. | All | Pityriasis versicolor                                                      |
| 14 | AB11. | All | Nigra: [tinea] or [keratomycosis]                                          |
| 15 | AB1y. | All | Other specified dermatomycoses                                             |
| 16 | AB1z. | All | Dermatomycosis NOS                                                         |
| 17 | AB230 | All | Candidal: [intertrigo] or [nappy rash] or [submammary]                     |
| 18 | AB231 | All | Other skin candidiasis                                                     |
| 19 | AB233 | All | Candidal paronychia                                                        |
| 20 | AB330 | All | Coccidioidal granuloma                                                     |
| 21 | AB500 | All | Cutaneous blastomycosis                                                    |
| 22 | AB510 | All | Mucocutaneous-lymphangitic paracoccidioidomycosis                          |
| 23 | AB620 | All | Cutaneous chromomycosis                                                    |
| 24 | AB622 | All | Subcutaneous phaeohyphomycotic abscess and cyst                            |
| 25 | AB64. | All | Mycotic: [mycetomas] or [madura foot]                                      |
| 26 | AB640 | All | Actinomycotic mycetoma                                                     |
| 27 | AD30. | All | (Scabies (& [Norwegian])) or (sarcoptic itch)                              |
| 28 |       |     | (Infestation: [other arthropod] or [Chigoe] or [sand flea]) or (Jigger     |
| 29 | AD41. | All | disease) or (Tungiasis)                                                    |
| 30 | Ayu50 | All | [X]Other early skin lesions of yaws                                        |
| 31 | AyuH4 | All | [X]Other arthropod infestations                                            |
| 32 | F4D10 | All | Stye                                                                       |
| 33 | F4D4. | All | Infective eyelid dermatitis of types resulting in deformity                |
| 34 | F4D5. | All | Other eyelid infective dermatitis                                          |
| 35 | F4D6. | All | Parasitic eyelid infestation                                               |
| 36 |       |     | (Acute infective otitis externa) or (abscess external ear) or (cellulitis  |
| 37 | F5011 | All | external ear)                                                              |
| 38 | F5018 | All | Furunculosis of external auditory meatus                                   |
| 39 | FyuB4 | All | [X]Parasitic infestation of eyelid in diseases classified elsewhere        |
| 40 | FyuB5 | All | [X]Involvement of eyelid in other infectious diseases classified elsewhere |
| 41 | G7510 | All | Kawasaki's disease                                                         |
| 42 | G751z | All | Acute febrile mucocutaneous lymph node syndrome NOS                        |
| 43 | J574G | All | Perianal infection                                                         |
| 44 | K2721 | All | Penile boil                                                                |
| 45 | K2722 | All | Penile carbuncle                                                           |
| 46 | K2723 | All | Cellulitis of penis                                                        |
| 47 |       |     |                                                                            |
| 48 |       |     |                                                                            |
| 49 |       |     |                                                                            |
| 50 |       |     |                                                                            |
| 51 |       |     |                                                                            |
| 52 |       |     |                                                                            |
| 53 |       |     |                                                                            |
| 54 |       |     |                                                                            |
| 55 |       |     |                                                                            |
| 56 |       |     |                                                                            |
| 57 |       |     |                                                                            |
| 58 |       |     |                                                                            |
| 59 |       |     |                                                                            |
| 60 |       |     |                                                                            |

|    |       |     |                                        |
|----|-------|-----|----------------------------------------|
| 1  |       |     |                                        |
| 2  |       |     |                                        |
| 3  |       |     |                                        |
| 4  | K2841 | All | Boil of scrotum                        |
| 5  | K2842 | All | Carbuncle of scrotum                   |
| 6  | K2843 | All | Cellulitis of scrotum                  |
| 7  | K4242 | All | Furuncle of vulva                      |
| 8  | K42y0 | All | Carbuncle of vagina                    |
| 9  | K42y1 | All | Carbuncle of labium                    |
| 10 | M0... | All | Infective dermatological disorders     |
| 11 | M00.. | All | Carbuncle                              |
| 12 | M000. | All | Carbuncle of face                      |
| 13 | M0000 | All | Carbuncle of ear                       |
| 14 | M0001 | All | Carbuncle of face (excluding eye)      |
| 15 | M0002 | All | Carbuncle of nasal septum              |
| 16 | M0003 | All | Carbuncle of temple region             |
| 17 | M000z | All | Carbuncle of face NOS                  |
| 18 | M001. | All | Carbuncle of neck                      |
| 19 | M002. | All | Carbuncle of trunk                     |
| 20 | M0020 | All | Carbuncle of chest wall                |
| 21 | M0021 | All | Carbuncle of breast                    |
| 22 | M0022 | All | Carbuncle of back                      |
| 23 | M0023 | All | Carbuncle of abdominal wall            |
| 24 | M0024 | All | Carbuncle of umbilicus                 |
| 25 | M0025 | All | Carbuncle of flank                     |
| 26 | M0026 | All | Carbuncle of groin                     |
| 27 | M0027 | All | Carbuncle of perineum                  |
| 28 | M002z | All | Carbuncle of trunk NOS                 |
| 29 | M003. | All | Carbuncle of upper arm and forearm     |
| 30 | M0030 | All | Carbuncle of shoulder                  |
| 31 | M0031 | All | Carbuncle of axilla                    |
| 32 | M0032 | All | Carbuncle of upper arm                 |
| 33 | M0033 | All | Carbuncle of elbow                     |
| 34 | M0034 | All | Carbuncle of forearm                   |
| 35 | M003z | All | Carbuncle of upper arm and forearm NOS |
| 36 | M004. | All | Carbuncle of hand                      |
| 37 | M0040 | All | Carbuncle of wrist                     |
| 38 | M0041 | All | Carbuncle of thumb                     |
| 39 | M0042 | All | Carbuncle of finger                    |
| 40 | M004z | All | Carbuncle of hand NOS                  |
| 41 | M005. | All | Carbuncle of buttock                   |
| 42 | M0050 | All | Carbuncle of anus                      |
| 43 | M0051 | All | Carbuncle of gluteal region            |
| 44 | M005z | All | Carbuncle of buttock NOS               |
| 45 | M006. | All | Carbuncle of leg (excluding foot)      |
| 46 |       |     |                                        |
| 47 |       |     |                                        |
| 48 |       |     |                                        |
| 49 |       |     |                                        |
| 50 |       |     |                                        |
| 51 |       |     |                                        |
| 52 |       |     |                                        |
| 53 |       |     |                                        |
| 54 |       |     |                                        |
| 55 |       |     |                                        |
| 56 |       |     |                                        |
| 57 |       |     |                                        |
| 58 |       |     |                                        |
| 59 |       |     |                                        |
| 60 |       |     |                                        |

|       |     |                                       |
|-------|-----|---------------------------------------|
| M0060 | All | Carbuncle of hip                      |
| M0061 | All | Carbuncle of thigh                    |
| M0062 | All | Carbuncle of knee                     |
| M0063 | All | Carbuncle of lower leg                |
| M0064 | All | Carbuncle of ankle                    |
| M006z | All | Carbuncle of leg (excluding foot) NOS |
| M007. | All | Carbuncle of foot                     |
| M0070 | All | Carbuncle of foot unspecified         |
| M0071 | All | Carbuncle of heel                     |
| M0072 | All | Carbuncle of toe                      |
| M007z | All | Carbuncle of foot NOS                 |
| M00y. | All | Carbuncle of other specified site     |
| M00y0 | All | Carbuncle of head (excluding face)    |
| M00yz | All | Carbuncle of other specified site NOS |
| M00z. | All | Carbuncle NOS                         |
| M01.. | All | Furuncle                              |
| M010. | All | Boil of face                          |
| M0100 | All | Boil of ear                           |
| M0101 | All | Boil of face (excluding eye)          |
| M0102 | All | Boil of nasal septum                  |
| M0103 | All | Boil of temple region                 |
| M0104 | All | Boil of external nose                 |
| M010z | All | Boil of face NOS                      |
| M011. | All | Boil of neck                          |
| M012. | All | Boil of trunk                         |
| M0120 | All | Boil of chest wall                    |
| M0121 | All | Boil of breast                        |
| M0122 | All | Boil of back                          |
| M0123 | All | Boil of abdominal wall                |
| M0124 | All | Boil of umbilicus                     |
| M0125 | All | Boil of flank                         |
| M0126 | All | Boil of groin                         |
| M0127 | All | Boil of perineum                      |
| M012z | All | Boil of trunk NOS                     |
| M013. | All | Boil of upper arm and forearm         |
| M0130 | All | Boil of shoulder                      |
| M0131 | All | Boil of axilla                        |
| M0132 | All | Boil of upper arm                     |
| M0133 | All | Boil of elbow                         |
| M0134 | All | Boil of forearm                       |
| M013z | All | Boil of upper arm and forearm NOS     |
| M014. | All | Boil of hand                          |

|       |     |                                                                                                                  |
|-------|-----|------------------------------------------------------------------------------------------------------------------|
| M0140 | All | Boil of wrist                                                                                                    |
| M0141 | All | Boil of thumb                                                                                                    |
| M0142 | All | Boil of finger                                                                                                   |
| M014z | All | Boil of hand NOS                                                                                                 |
| M015. | All | Boil of buttock                                                                                                  |
| M0150 | All | Boil of anus                                                                                                     |
| M0151 | All | Boil of gluteal region                                                                                           |
| M015z | All | Boil of buttock NOS                                                                                              |
| M016. | All | Boil of leg (excluding foot)                                                                                     |
| M0160 | All | Boil of hip                                                                                                      |
| M0161 | All | Boil of thigh                                                                                                    |
| M0162 | All | Boil of knee                                                                                                     |
| M0163 | All | Boil of lower leg                                                                                                |
| M0164 | All | Boil of ankle                                                                                                    |
| M016z | All | Boil of leg (excluding foot) NOS                                                                                 |
| M017. | All | Boil of foot                                                                                                     |
| M0170 | All | Boil of foot unspecified                                                                                         |
| M0171 | All | Boil of heel                                                                                                     |
| M0172 | All | Boil of toe                                                                                                      |
| M017z | All | Boil of foot NOS                                                                                                 |
| M01y. | All | Boil of other specified site                                                                                     |
| M01y0 | All | Boil of head (excluding face)                                                                                    |
| M01yz | All | Boil of other specified site NOS                                                                                 |
| M01z. | All | Boils: [Recurrent] or [multiple sites] or [NOS]                                                                  |
| M01z0 | All | Multiple boils                                                                                                   |
| M02.. | All | Cellulitis and abscess of finger and toe                                                                         |
| M020. | All | Cellulitis and abscess of finger                                                                                 |
| M0200 | All | Cellulitis and abscess of finger unspecified                                                                     |
| M0201 | All | (Finger pulp abscess) or (felon) or (whitlow)                                                                    |
| M0202 | All | Onychia of finger                                                                                                |
| M0203 | All | Finger: [perionychia] or [paronychia]                                                                            |
| M0204 | All | Finger web space infection                                                                                       |
| M0205 | All | Pulp space infection of finger/thumb                                                                             |
| M020z | All | Cellulitis and abscess of finger NOS                                                                             |
| M021. | All | Cellulitis and abscess of toe                                                                                    |
| M0210 | All | Cellulitis and abscess of toe unspecified                                                                        |
| M0211 | All | Onychia of toe                                                                                                   |
| M0212 | All | Paronychial infection of toe                                                                                     |
| M0213 | All | Pulp space infection of toe                                                                                      |
| M021z | All | Toe: [Perionychia] or [cellulitis and abscess NOS]                                                               |
| M02z. | All | Digit: [paronychial infection] or [infected nailfold] or [cellulitis and abscess of NOS] or [nail infection NOS] |

|       |     |                                                                                                                                           |
|-------|-----|-------------------------------------------------------------------------------------------------------------------------------------------|
| M03.. | All | (Skin area excluding digits of hand or foot: [abscess] or [acute lymphangitis of skin] or [cellulitis]) or (other cellulitis and abscess) |
| M030. | All | Cellulitis and abscess of face                                                                                                            |
| M0300 | All | Cellulitis and abscess of cheek (& external)                                                                                              |
| M0301 | All | Cellulitis and abscess of nose (& external)                                                                                               |
| M0302 | All | Cellulitis and abscess of chin                                                                                                            |
| M0303 | All | Cellulitis and abscess of submandibular region                                                                                            |
| M0304 | All | Cellulitis and abscess of forehead                                                                                                        |
| M0305 | All | Cellulitis and abscess of temple region                                                                                                   |
| M0306 | All | Cellulitis of face                                                                                                                        |
| M030z | All | Cellulitis and abscess of face NOS                                                                                                        |
| M031. | All | (Cellulitis and abscess of neck) or (cervical abscess)                                                                                    |
| M032. | All | Cellulitis and abscess of trunk                                                                                                           |
| M0320 | All | Cellulitis and abscess of chest wall                                                                                                      |
| M0321 | All | Cellulitis and abscess of breast                                                                                                          |
| M0322 | All | Cellulitis and abscess of back                                                                                                            |
| M0323 | All | Cellulitis and abscess of abdominal wall                                                                                                  |
| M0324 | All | Cellulitis and abscess of umbilicus                                                                                                       |
| M0325 | All | Cellulitis and abscess of flank                                                                                                           |
| M0326 | All | Cellulitis and abscess of groin                                                                                                           |
| M0327 | All | Cellulitis and abscess of perineum                                                                                                        |
| M0328 | All | Cellulitis of trunk                                                                                                                       |
| M032z | All | Cellulitis and abscess of trunk NOS                                                                                                       |
| M033. | All | Cellulitis and abscess of arm                                                                                                             |
| M0330 | All | Cellulitis and abscess of shoulder                                                                                                        |
| M0331 | All | Cellulitis and abscess of axilla                                                                                                          |
| M0332 | All | Cellulitis and abscess of upper arm                                                                                                       |
| M0333 | All | Cellulitis and abscess of elbow                                                                                                           |
| M0334 | All | Cellulitis and abscess of forearm                                                                                                         |
| M033z | All | Cellulitis and abscess of arm NOS                                                                                                         |
| M034. | All | Cellulitis and abscess of hand (& excluding digits)                                                                                       |
| M0340 | All | Hand: (abscess and/or cellulitis) of (dorsum or palm or unspecified)                                                                      |
| M0341 | All | Cellulitis and abscess of wrist                                                                                                           |
| M034z | All | Cellulitis and abscess of hand NOS                                                                                                        |
| M035. | All | Cellulitis and abscess of buttock                                                                                                         |
| M036. | All | Cellulitis and abscess of leg (& excluding foot)                                                                                          |
| M0360 | All | Cellulitis and abscess of hip                                                                                                             |
| M0361 | All | Cellulitis and abscess of thigh                                                                                                           |
| M0362 | All | Cellulitis and abscess of knee                                                                                                            |
| M0363 | All | Cellulitis and abscess of lower leg                                                                                                       |
| M0364 | All | Cellulitis and abscess of ankle                                                                                                           |
| M036z | All | Cellulitis and abscess of leg NOS                                                                                                         |
| M037. | All | Cellulitis and abscess of foot (& excluding toe)                                                                                          |

|       |     |                                                                       |
|-------|-----|-----------------------------------------------------------------------|
| M0370 | All | Cellulitis and abscess of foot unspecified                            |
| M0371 | All | Cellulitis and abscess of heel                                        |
| M0372 | All | Cellulitis in diabetic foot                                           |
| M037z | All | Cellulitis and abscess of foot NOS                                    |
| M038. | All | NULL                                                                  |
| M03y. | All | Other specified cellulitis and abscess                                |
| M03y0 | All | (Cellulitis and abscess of head unspecified) or (abscess of scalp)    |
| M03z. | All | Cellulitis and abscess NOS                                            |
| M03z0 | All | Cellulitis NOS                                                        |
| M03z1 | All | Abscess NOS                                                           |
| M03zz | All | (Cellulitis and abscess NOS) or (acute lymphangitis NOS)              |
| M04.. | All | Acute: [lymphadenitis] or [abscess lymph node] or [cervical adenitis] |
| M040. | All | Acute lymphadenitis of trunk                                          |
| M041. | All | Acute lymphadenitis of upper limb                                     |
| M042. | All | Acute lymphadenitis of lower limb                                     |
| M043. | All | Acute lymphadenitis of face, head and neck                            |
| M05.. | All | Impetigo                                                              |
| M050. | All | Impetigo contagiosa unspecified                                       |
| M051. | All | [Bullous impetigo] or [impetigo herpetiformis]                        |
| M052. | All | Impetigo contagiosa gyrata                                            |
| M053. | All | Impetigo circinata                                                    |
| M054. | All | Impetigo neonatorum                                                   |
| M055. | All | Impetigo simplex                                                      |
| M056. | All | Impetigo follicularis                                                 |
| M057. | All | Chronic symmetrical impetigo                                          |
| M05z. | All | Impetigo NOS                                                          |
| M06.. | All | Pilonidal sinus/cyst                                                  |
| M060. | All | Pilonidal cyst with abscess                                           |
| M061. | All | (Pilonidal cyst with no abscess) or (dermal sinus)                    |
| M062. | All | Pilonidal sinus with abscess                                          |
| M063. | All | Pilonidal sinus without abscess                                       |
| M06z. | All | Pilonidal sinus/cyst NOS                                              |
| M07.. | All | Other local infections of skin and subcutaneous tissue                |
| M070. | All | Pyogenic infection of skin and subcutis                               |
| M0700 | All | Chancriform pyoderma                                                  |
| M0701 | All | Pyoderma faciale                                                      |
| M0702 | All | Pyoderma gangrenosum                                                  |
| M0703 | All | Pyoderma ulcerosum tropicalum                                         |
| M070z | All | Pyoderma NOS                                                          |
| M071. | All | Pyogenic granuloma                                                    |
| M0710 | All | Pyogenic granuloma unspecified                                        |
| M0711 | All | Pyogenic progressive granuloma                                        |

|       |     |                                                                                                                                          |
|-------|-----|------------------------------------------------------------------------------------------------------------------------------------------|
| M0712 | All | NULL                                                                                                                                     |
| M0713 | All | Umbilical granuloma                                                                                                                      |
| M071z | All | Pyogenic granuloma NOS                                                                                                                   |
| M072. | All | NULL                                                                                                                                     |
| M073. | All | Scalp infection                                                                                                                          |
| M07y. | All | (Pustular eczema) or (other specified local infection of skin or subcutaneous tissue)                                                    |
| M07y0 | All | Acute palmoplantar pustular psoriasis                                                                                                    |
| M07y1 | All | Ecthyma                                                                                                                                  |
| M07y2 | All | Dermatitis vegetans                                                                                                                      |
| M07y3 | All | NULL                                                                                                                                     |
| M07y4 | All | NULL                                                                                                                                     |
| M07y5 | All | Inflammation of scar                                                                                                                     |
| M07yz | All | Infection: [toe] or [foot] or [finger] or [other specified local infection of skin and subcutaneous tissue NOS]                          |
| M07z. | All | (Septic spots) or (sinus) or (infected skin: [insect bite] or [ulcer] or [dermatitis] or [local infection skin/subcutaneous tissue NOS]) |
| M07z0 | All | NULL                                                                                                                                     |
| M07z1 | All | NULL                                                                                                                                     |
| M07z2 | All | NULL                                                                                                                                     |
| M08.. | All | NULL                                                                                                                                     |
| M080. | All | (Cellulitis: [of thumb] or [[X] of finger and toe]) or (nail bed infection) or (septic thumb)                                            |
| M081. | All | [X]Cellulitis of other parts limb                                                                                                        |
| M082. | All | NULL                                                                                                                                     |
| M083. | All | NULL                                                                                                                                     |
| M084. | All | [X]Cellulitis of breast                                                                                                                  |
| M085. | All | NULL                                                                                                                                     |
| M086. | All | Cellulitis of ankle                                                                                                                      |
| M087. | All | Chronic paronychia                                                                                                                       |
| M088. | All | NULL                                                                                                                                     |
| M089. | All | NULL                                                                                                                                     |
| M08A. | All | NULL                                                                                                                                     |
| M08B. | All | NULL                                                                                                                                     |
| M08C. | All | NULL                                                                                                                                     |
| M08y. | All | [X]Cellulitis of other sites                                                                                                             |
| M09.. | All | NULL                                                                                                                                     |
| M090. | All | Abscess of face                                                                                                                          |
| M091. | All | Abscess of neck                                                                                                                          |
| M092. | All | Abscess of trunk                                                                                                                         |
| M0920 | All | NULL                                                                                                                                     |
| M0921 | All | NULL                                                                                                                                     |
| M0922 | All | NULL                                                                                                                                     |
| M093. | All | Abscess of buttock                                                                                                                       |



|       |     |                                                                               |
|-------|-----|-------------------------------------------------------------------------------|
| M094. | All | Abscess of limb                                                               |
| M0940 | All | NULL                                                                          |
| M095. | All | NULL                                                                          |
| M09y. | All | [X]Abscess of other site                                                      |
| M0y.. | All | Other specified infections of skin or subcutaneous tissue                     |
| M0z.. | All | Infected: [sebaceous cyst] or [skin and subcut tissue NOS]                    |
| M102. | All | [Infective eczematoid dermatitis] or [Pustular eczema] or [Septic dermatitis] |
| M1512 | All | Erythema marginatum                                                           |
| M15y0 | All | Staphylococcal scalded skin syndrome                                          |
| M15y6 | All | Erythema marginatum in acute rheumatic fever                                  |
| M161A | All | Psoriasis palmaris                                                            |
| M161B | All | Psoriasis plantaris                                                           |
| M163. | All | Pityriasis rosea                                                              |
| M21y0 | All | Acrodermatitis chronica atrophicans                                           |
| M2440 | All | Dissecting cellulitis of scalp                                                |
| M2441 | All | Sycosis barbae                                                                |
| M2442 | All | Folliculitis depilans                                                         |
| M2443 | All | Pustular folliculitis                                                         |
| M2444 | All | Perifolliculitis                                                              |
| M2446 | All | Deep bacterial folliculitis                                                   |
| M2447 | All | Perifolliculitis of scalp                                                     |
| M244z | All | Folliculitis NOS                                                              |
| Myu0. | All | [X]Infections of the skin and subcutaneous tissue                             |
| Myu01 | All | [X]Other specified local infections of the skin and subcutaneous tissue       |
| Myu02 | All | [X]Impetiginisation of other dermatoses                                       |
| SP30. | All | Generalised vaccinia                                                          |
| X00hk | All | Cellulitis of external ear                                                    |
| X00hm | All | Cellulitis of pinna                                                           |
| X00hn | All | Abscess of pinna                                                              |
| X00IR | All | Lupus vulgaris of nose                                                        |
| X00YN | All | Cellulitis of eyelid                                                          |
| X00YS | All | Infectious dermatosis of eyelid                                               |
| X00YT | All | Bacterial dermatitis of eyelid                                                |
| X00YU | All | Impetigo of eyelid                                                            |
| X00YV | All | Viral dermatitis of eyelid                                                    |
| X00YW | All | Fungal dermatitis of eyelid                                                   |
| X20QY | All | Cancrum oris                                                                  |
| X4004 | All | Gangrenous balanitis                                                          |
| X400A | All | Mycoplasma balanitis                                                          |
| X400B | All | Chlamydial balanitis                                                          |
| X400w | All | Fournier's gangrene of scrotum                                                |
| X4087 | All | Vulval amoebiasis                                                             |

|       |     |                                                          |
|-------|-----|----------------------------------------------------------|
| X4089 | All | Chlamydial Bartholinitis                                 |
| X408C | All | Vulval warts                                             |
| X408D | All | Condyloma acuminata of vulva                             |
| X5002 | All | Viral dermatological disorders                           |
| X5003 | All | Pox virus infection of skin                              |
| X5004 | All | Vaccinia                                                 |
| X5005 | All | Eczema vaccinatum                                        |
| X5006 | All | Viral exanthem                                           |
| X5007 | All | Infectious mononucleosis exanthem                        |
| X500A | All | Dermatosis of suspected viral aetiology                  |
| X500b | All | Pseudomonas aeruginosa paronychia                        |
| X500B | All | Gianotti-Crosti syndrome                                 |
| X500E | All | Chlamydial dermatological disorders                      |
| X500f | All | Recurrent boils                                          |
| X500g | All | Boils of multiple sites                                  |
| X500I | All | Exanthem due to ornithosis                               |
| X500J | All | Bacterial dermatological disorders                       |
| X500K | All | Non-bullous impetigo                                     |
| X500L | All | Streptococcal impetigo                                   |
| X500M | All | Staphylococcal non-bullous impetigo                      |
| X500N | All | Secondary impetiginisation                               |
| X500O | All | Scalp folliculitis                                       |
| X500P | All | Staphylococcal folliculitis of scalp                     |
| X500q | All | Ecthyma gangrenosum                                      |
| X500Q | All | Gram-negative folliculitis                               |
| X500r | All | Sycosis                                                  |
| X500R | All | Staphylococcal granuloma                                 |
| X500s | All | Acute sycosis barbae                                     |
| X500t | All | Sycosis cruris                                           |
| X500u | All | Lupoid sycosis                                           |
| X500U | All | Abscess of skin                                          |
| X500v | All | Lupoid sycosis of beard                                  |
| X500V | All | Cervical abscess                                         |
| X500w | All | Folliculitis decalvans                                   |
| X500W | All | Abscess of skin area excluding digits of hand or foot    |
| X500x | All | Folliculitis keloidalis nuchae                           |
| X500X | All | Abscess of dorsum of hand                                |
| X500y | All | Chronic folliculitis of legs                             |
| X500Y | All | Abscess of palm of hand                                  |
| X500z | All | Cutaneous cellulitis                                     |
| X500Z | All | Abscess of scalp                                         |
| X5010 | All | Cellulitis of skin area excluding digits of hand or foot |

|       |     |                                                             |
|-------|-----|-------------------------------------------------------------|
| X5011 | All | Cellulitis of dorsum of hand                                |
| X5012 | All | Cellulitis of palm of hand                                  |
| X5013 | All | Necrotising fasciitis                                       |
| X5014 | All | Necrotising fasciitis of scrotum and perineum               |
| X5015 | All | Progressive bacterial synergistic gangrene                  |
| X5018 | All | Anaerobic cellulitis                                        |
| X501b | All | Non-pyogenic bacterial infection of skin                    |
| X501c | All | Erythrasma                                                  |
| X501d | All | Pitted keratolysis                                          |
| X501E | All | Cellulitis of leg                                           |
| X501G | All | Acute lymphangitis NOS                                      |
| X501H | All | Acute lymphangitis of skin excluding digits of hand or foot |
| X501I | All | Acute cervical adenitis                                     |
| X501J | All | Site-specific pyogenic infection of skin and subcutis       |
| X501N | All | Blistering distal dactylitis                                |
| X501O | All | Infection of nail                                           |
| X501Q | All | Infection of toe web                                        |
| X501r | All | Cutaneous involvement in listeriosis                        |
| X501R | All | Staphylococcal intertrigo                                   |
| X501S | All | Streptococcal intertrigo                                    |
| X501t | All | Fusobacterium infection of skin                             |
| X501U | All | Perianal streptococcal infection of newborn                 |
| X501v | All | Tropical ulcer                                              |
| X501V | All | Botryomycosis                                               |
| X501w | All | Desert sore                                                 |
| X501W | All | Staphylococcal botryomycosis                                |
| X501x | All | Corynebacterium pyogenes infection of skin                  |
| X501X | All | Cutaneous botryomycosis                                     |
| X501Z | All | Dermatitis gangrenosa infantum                              |
| X5020 | All | Moraxella infection of skin                                 |
| X5021 | All | Staphylococcal scarlatina                                   |
| X502a | All | Primary cutaneous blastomycosis                             |
| X502A | All | Tuberculide                                                 |
| X502B | All | Papular tuberculide                                         |
| X502E | All | Nodular tuberculide                                         |
| X502H | All | Cutaneous complication of BCG immunisation                  |
| X502I | All | BCG granuloma                                               |
| X502j | All | Chromomycosis                                               |
| X502J | All | BCG ulcer                                                   |
| X502I | All | Subcutaneous zygomycosis                                    |
| X502o | All | Systemic fungal infection affecting skin                    |
| X502p | All | Dermatophytide                                              |

|       |     |                                                |
|-------|-----|------------------------------------------------|
| X502P | All | Pityrosporum infection of skin                 |
| X502q | All | Trichophytide                                  |
| X502Q | All | Pityrosporum folliculitis                      |
| X502r | All | Microsporide                                   |
| X502R | All | Steroid-modified tinea infection               |
| X502s | All | Epidermophytide                                |
| X502t | All | Parasitic infestation of skin                  |
| X502u | All | Nematode infestation of skin                   |
| X502U | All | Cutaneous alternariosis                        |
| X502v | All | Streptocerciasis                               |
| X502V | All | Scytalidium dimidiatum infection of skin       |
| X502W | All | Scytalidium hyalinum infection of skin         |
| X502Y | All | Systemic mycosis affecting skin                |
| X5031 | All | Amoebiasis of skin                             |
| X5038 | All | Protozoal infestation of skin                  |
| X503J | All | Maculae ceruleae - disorder                    |
| X509H | All | Nail infection NOS                             |
| X509m | All | Erosive pustular dermatosis of the scalp       |
| X50BW | All | Infected skin ulcer                            |
| X50Dw | All | Eosinophilic panniculitis                      |
| X50FB | All | Eosinophilic cellulitis                        |
| X50GV | All | Bullous pyoderma                               |
| X70HA | All | Tuberculous chancre                            |
| X70HB | All | Acute tuberculous ulcer                        |
| X70HC | All | Acute miliary cutaneous tuberculosis           |
| X70HD | All | Cutaneous tuberculous gumma                    |
| X70Hy | All | Cutaneous mycobacterium ulcerans infection     |
| X70Hz | All | Cutaneous mycobacterium marinum infection      |
| X70I0 | All | Swimming pool granuloma                        |
| X70I1 | All | Fish tank granuloma                            |
| X70IA | All | Cutaneous streptococcal ulcer                  |
| X70IS | All | Gas gangrene of skin                           |
| X70JO | All | Herpes simplex infection of skin               |
| X70JP | All | Chronic mucocutaneous herpes simplex infection |
| X70Lc | All | Giant condyloma acuminata                      |
| X70LO | All | Facial wart                                    |
| X70LP | All | Hand wart                                      |
| X70LQ | All | Periungual wart                                |
| X70LR | All | Subungual wart                                 |
| X70LS | All | Filiform wart                                  |
| X70LT | All | Digitate wart                                  |
| X70LU | All | Butcher's wart                                 |

|       |     |                                  |
|-------|-----|----------------------------------|
| X70LV | All | Plane wart                       |
| X70LW | All | Mosaic plantar wart              |
| X70LX | All | Myrmecia plantar wart            |
| X70LY | All | Epidermodysplasia verruciformis  |
| X70LZ | All | Anogenital warts                 |
| X70N8 | All | Cutaneous gonorrhoea             |
| X70N9 | All | Gonococcal cellulitis            |
| X70NB | All | Chancroid - anogenital ulcer     |
| X70NC | All | Chancroid - extragenital ulcer   |
| X70Nd | All | Anal warts                       |
| X70ND | All | Chancroid - latent infection     |
| X70Nf | All | Penile warts                     |
| X70Nt | All | Donovanosis - anogenital ulcer   |
| X70Nu | All | Donovanosis - inguinal lesion    |
| X70Nv | All | Donovanosis - non-genital lesion |
| X70OR | All | Bacillary angiomatosis           |
| X70Pi | All | Leptospiral rash                 |
| X70PJ | All | Penile amoebiasis                |
| X70PL | All | Amoebic abscess of skin          |
| X70Pn | All | Plantar papillomata of yaws      |
| X70Po | All | Palmar papillomata of yaws       |
| X70Pp | All | Macular yaws                     |
| X70Pq | All | Maculopapular yaws               |
| X70Pr | All | Micropapular yaws                |
| X70Ps | All | Papular yaws                     |
| X70Pt | All | Palmar yaws hyperkeratosis       |
| X70Pu | All | Plantar yaws hyperkeratosis      |
| X70PY | All | Erythema chronicum migrans       |
| X70Qe | All | Cutaneous aspergillosis          |
| X70QJ | All | Fungal dermatosis                |
| X70QK | All | Mycetoma                         |
| X70QM | All | Kerion                           |
| X70QN | All | Favus                            |
| X70QO | All | Tinea faciei                     |
| X70Qp | All | Perineal candidiasis             |
| X70QP | All | Tinea cruris                     |
| X70QQ | All | Nodular folliculitis             |
| X70Qr | All | Candidiasis of skin              |
| X70QR | All | Trichomyces axillaris            |
| X70Qs | All | Napkin candidiasis               |
| X70QS | All | Tinea imbricata                  |
| X70Qt | All | Submammary intertrigo            |

|       |     |                                          |
|-------|-----|------------------------------------------|
| X70Qu | All | Candidiasis of finger web                |
| X70Rc | All | Cutaneous histoplasmosis                 |
| X70Rd | All | Primary cutaneous histoplasmosis         |
| X70RD | All | Cutaneous cryptococcosis                 |
| X70Re | All | Disseminated cutaneous histoplasmosis    |
| X70RG | All | Cutaneous coccidioidomycosis             |
| X70Rh | All | Disseminated cutaneous blastomycosis     |
| X70RH | All | Subcutaneous coccidioidomycosis          |
| X70Rj | All | Cutaneous lobomycosis                    |
| X70Rk | All | Primary lobomycotic nodule               |
| X70RI | All | Chronic coalescent cutaneous lobomycosis |
| X70Rw | All | Cutaneous trichosporonosis               |
| X70Rz | All | Cutaneous chromoblastomycosis            |
| X70S0 | All | Primary chromoblastomycotic nodule       |
| X70S1 | All | Cutaneous chromoblastomycotic abscess    |
| X70S2 | All | Lymphocutaneous chromoblastomycosis      |
| X70S5 | All | Phaeohyphomycosis of skin                |
| X70S6 | All | Phaeohyphomycotic subcutaneous cyst      |
| X70SK | All | Conidiobolomycosis                       |
| X70SL | All | Rhinofacial conidiobolomycosis           |
| X70SM | All | Disseminated conidiobolomycosis          |
| X70SO | All | Cutaneous basidiobolomycosis             |
| X70Tk | All | Onchodermatitis                          |
| X70Tm | All | Onchocercal subcutaneous nodule          |
| X70Tn | All | Onchocercal depigmentation               |
| X70To | All | Onchocercal lichenification              |
| X70Tp | All | Sowda                                    |
| X70UA | All | Cutaneous strongyloidiasis               |
| X70UB | All | Strongyloidal ground itch                |
| X70UC | All | Strongyloidal cutaneous larva migrans    |
| X70UD | All | Larva currens                            |
| X70UJ | All | Gnathostomal cutaneous larva migrans     |
| X70Ut | All | Scabetic nodule                          |
| X70Uu | All | Post-scabetic nodule                     |
| X70Uv | All | Crusted scabies                          |
| X70Uy | All | Arthropod dermatosis                     |
| X70Uz | All | Dermatosis due to mites                  |
| X70V0 | All | Grocer's itch                            |
| X70V1 | All | Baker's itch                             |
| X70V2 | All | Copra itch                               |
| X70V3 | All | Straw itch                               |
| X70V4 | All | Grain itch                               |

|       |     |                                                |
|-------|-----|------------------------------------------------|
| X70V5 | All | Grain-shoveller's itch                         |
| X70V6 | All | Cotton-seed itch                               |
| X70V7 | All | Bean itch                                      |
| X70V8 | All | Barley itch                                    |
| X70V9 | All | Demodex folliculitis                           |
| X70VA | All | Dermatophagoidal dermatosis                    |
| X70VB | All | Animal mite infestation                        |
| X70VC | All | Cheyletiella dermatitis                        |
| X70VD | All | Dog mite infestation                           |
| X70VE | All | Cat mite infestation                           |
| X70VF | All | Rabbit mite infestation                        |
| X70VG | All | Rat mite infestation                           |
| X70VH | All | Mouse mite infestation                         |
| X70VI | All | Bird mite infestation                          |
| X70VK | All | Fowl mite infestation                          |
| X70VL | All | Chiggers infestation                           |
| X70VM | All | Dermatoses due to plant mites                  |
| X70VN | All | Dermatosis due to bug                          |
| X70VQ | All | Flea infestation                               |
| X70VR | All | Jiggers infestation                            |
| X70VS | All | Tongueworm infection                           |
| X70VT | All | Tongueworm cyst                                |
| X70VU | All | Tongueworm granuloma                           |
| X70VV | All | Halzoun                                        |
| X75vf | All | Paronychia                                     |
| X75vg | All | Bacterial paronychia                           |
| X75wp | All | Folliculitis of lids                           |
| X78Rn | All | Infected sebaceous cyst                        |
| X78Rs | All | Warty dyskeratoma                              |
| XA00w | All | Infected insect bite                           |
| Xa0Aq | All | Neonatal pyoderma                              |
| Xa0bE | All | Streptococcal cellulitis                       |
| Xa0bF | All | Meleney's gangrene                             |
| Xa0bG | All | Cutaneous African histoplasmosis               |
| Xa0bl | All | Larva migrans of skin                          |
| Xa0kT | All | Amoebic granuloma of skin                      |
| Xa0Qy | All | Complicated donovanosis                        |
| Xa0Ws | All | Staphylococcus aureus superficial folliculitis |
| Xa139 | All | Site-specific infective disorders of skin      |
| Xa13A | All | Intertrigo                                     |
| Xa13C | All | Submammary monilia                             |
| Xa1y2 | All | Abscess of toe                                 |

|       |     |                                            |
|-------|-----|--------------------------------------------|
| Xa1ZW | All | Cutaneous disorders of Yaws                |
| Xa2jn | All | Cellulitis of arm                          |
| Xa3gD | All | Carbuncle/boil                             |
| Xa3gE | All | Cellulitis of toe                          |
| Xa3gF | All | Cellulitis of hand excluding finger        |
| Xa3gG | All | Cellulitis of leg, excluding foot          |
| Xa3gH | All | Cellulitis of foot excluding toe           |
| Xa40b | All | Cellulitis - digit NOS                     |
| Xa6qC | All | Perineal wart                              |
| Xa6qD | All | Female perineal wart                       |
| Xa7Ht | All | Cellulitis of heel                         |
| Xa7Hw | All | Axillary abscess                           |
| Xa7I2 | All | Periorbital cellulitis                     |
| Xa7Ic | All | Infected nail bed                          |
| Xa7Id | All | Cellulitis of scalp                        |
| Xa7Iv | All | Infected face                              |
| Xa7Iz | All | Infected heel                              |
| Xa7m0 | All | Infected thumb                             |
| Xa7m3 | All | Septic finger                              |
| Xa7m4 | All | Infected hand                              |
| Xa7nf | All | Intertrigo of abdominal skin fold          |
| Xa7Ni | All | Infection toe                              |
| Xa7Nj | All | Infection foot                             |
| Xa7Nk | All | Infection finger                           |
| Xa7yw | All | Abscess of finger                          |
| Xa82g | All | Perineal abscess                           |
| Xa83I | All | Cellulitis of elbow                        |
| Xa83m | All | Abscess of elbow                           |
| Xa83W | All | Abscess of foot                            |
| Xa85W | All | Loin abscess                               |
| Xa86C | All | Cellulitis of abdominal wall               |
| Xa89z | All | Boil of lower limb                         |
| Xa8A1 | All | Carbuncle of upper limb                    |
| Xa8A4 | All | Carbuncle of lower limb                    |
| Xa97f | All | Anogenital human papilloma virus infection |
| Xa97i | All | Early yaws skin lesion                     |
| Xa97k | All | Tinea pedis                                |
| Xa97I | All | Ringworm of body                           |
| Xa9CU | All | Pilonidal abscess                          |
| Xa9CY | All | Hidradenitis suppurativa                   |
| Xa9zj | All | Abscess of ankle                           |
| Xaa9L | All | Recurrent genital warts                    |



|       |     |                                            |
|-------|-----|--------------------------------------------|
| XaB64 | All | Cellulitis - anus or rectum                |
| XaB65 | All | Perianal cellulitis                        |
| XaBDy | All | Cellulitis of axilla                       |
| XaBEE | All | Cellulitis of neck                         |
| XaBj5 | All | Abscess of back                            |
| XaBkZ | All | Groin abscess                              |
| XaBmh | All | Cellulitis of skin of back                 |
| XaBsM | All | Infection of big toe                       |
| XaBXe | All | Abdominal wall abscess                     |
| XaBXh | All | Abscess of big toe                         |
| XaBXi | All | Abscess of cheek                           |
| XaBXj | All | Abscess of thigh                           |
| XaBXk | All | Abscess of forehead                        |
| XaDbx | All | Toxocara larva migrans of skin             |
| XaEGL | All | Hand warts                                 |
| XaEJd | All | Prepatellar abscess                        |
| XaF8F | All | Preseptal cellulitis                       |
| XaFCr | All | Cellulitis of thigh                        |
| XaI8d | All | Abscess of lower limb                      |
| XaI8e | All | Abscess of upper limb                      |
| XaINT | All | Blind boil                                 |
| XaLWv | All | Nasal furuncle                             |
| XaMgL | All | [X]Vulval warts                            |
| XaMgM | All | [X]Perineal warts                          |
| XaR2I | All | Recurrent cellulitis                       |
| XaY4a | All | Pustular eczema                            |
| XaY4o | All | Infected eczema                            |
| XaY4Z | All | Infective eczematoid dermatitis            |
| XaYO5 | All | Cellulitis of thumb                        |
| XaYOq | All | Bullous impetigo                           |
| XaYRx | All | Bullous staphylococcal impetigo            |
| XE0aH | All | Angular cheilitis                          |
| XE0eV | All | Carbuncle of vulva                         |
| XE0RS | All | Human papilloma virus infection of skin    |
| XE0RT | All | Genital warts                              |
| XE0RU | All | Perianal warts                             |
| XE0S1 | All | Chancroid                                  |
| XE0S2 | All | Donovanosis                                |
| XE0S7 | All | Yaws hyperkeratosis                        |
| XE0S9 | All | Dermatophytosis                            |
| XE0SA | All | Dermatophytosis of scalp or beard          |
| XE0SC | All | Dermatophytosis of groin and perianal area |

|    |       |     |                                                                     |
|----|-------|-----|---------------------------------------------------------------------|
| 1  |       |     |                                                                     |
| 2  |       |     |                                                                     |
| 3  |       |     |                                                                     |
| 4  |       |     |                                                                     |
| 5  |       |     |                                                                     |
| 6  |       |     |                                                                     |
| 7  |       |     |                                                                     |
| 8  |       |     |                                                                     |
| 9  |       |     |                                                                     |
| 10 |       |     |                                                                     |
| 11 |       |     |                                                                     |
| 12 |       |     |                                                                     |
| 13 |       |     |                                                                     |
| 14 |       |     |                                                                     |
| 15 |       |     |                                                                     |
| 16 |       |     |                                                                     |
| 17 |       |     |                                                                     |
| 18 |       |     |                                                                     |
| 19 |       |     |                                                                     |
| 20 |       |     |                                                                     |
| 21 |       |     |                                                                     |
| 22 |       |     |                                                                     |
| 23 |       |     |                                                                     |
| 24 |       |     |                                                                     |
| 25 |       |     |                                                                     |
| 26 |       |     |                                                                     |
| 27 |       |     |                                                                     |
| 28 |       |     |                                                                     |
| 29 |       |     |                                                                     |
| 30 |       |     |                                                                     |
| 31 |       |     |                                                                     |
| 32 |       |     |                                                                     |
| 33 |       |     |                                                                     |
| 34 |       |     |                                                                     |
| 35 |       |     |                                                                     |
| 36 |       |     |                                                                     |
| 37 |       |     |                                                                     |
| 38 |       |     |                                                                     |
| 39 |       |     |                                                                     |
| 40 |       |     |                                                                     |
| 41 |       |     |                                                                     |
| 42 |       |     |                                                                     |
| 43 |       |     |                                                                     |
| 44 |       |     |                                                                     |
| 45 |       |     |                                                                     |
| 46 |       |     |                                                                     |
| 47 |       |     |                                                                     |
| 48 |       |     |                                                                     |
| 49 |       |     |                                                                     |
| 50 |       |     |                                                                     |
| 51 |       |     |                                                                     |
| 52 |       |     |                                                                     |
| 53 |       |     |                                                                     |
| 54 |       |     |                                                                     |
| 55 |       |     |                                                                     |
| 56 |       |     |                                                                     |
| 57 |       |     |                                                                     |
| 58 |       |     |                                                                     |
| 59 |       |     |                                                                     |
| 60 |       |     |                                                                     |
|    | XE0SD | All | Dermatophytosis of the body                                         |
|    | XE0Se | All | Scabies                                                             |
|    | XE0SE | All | Deep seated dermatophytosis                                         |
|    | XE0SF | All | Tinea nigra                                                         |
|    | XE0Sg | All | Other arthropod infestation                                         |
|    | XE0SK | All | Candida intertrigo                                                  |
|    | XE0SP | All | Eumycetoma                                                          |
|    | XE0TC | All | (Actinomycosis (& [infections]) or (erythrasma)                     |
|    | XE0Te | All | Viral warts (& [condyloma acuminatum])                              |
|    | XE0Tg | All | Other viral warts                                                   |
|    | XE0UC | All | (Tinea: [groin/perianal] or [cruris]) or (Dhobie itch)              |
|    | XE16h | All | Abscess of eyelid                                                   |
|    | XE1Aa | All | Cellulitis and abscess of leg                                       |
|    | XE1Ab | All | Cellulitis and abscess of foot excluding toe                        |
|    | XE1Ac | All | Cellulitis and abscess of head unspecified                          |
|    | XE1Ad | All | Acute lymphadenitis                                                 |
|    | XE1Ae | All | Pilonidal cyst with no abscess                                      |
|    | XE1Ag | All | Other specified local infection of skin or subcutaneous tissue      |
|    | XE1Ai | All | Other specified local infection of skin and subcutaneous tissue NOS |
|    | XE1Aj | All | Local infection skin/subcut tissue NOS                              |
|    | XE1Ak | All | [X]Cellulitis of finger and toe                                     |
|    | XE1Al | All | Skin and subcut tissue infection NOS                                |
|    | XE1AO | All | Boil of upper limb                                                  |
|    | XE1AP | All | Boil NOS                                                            |
|    | XE1AQ | All | Finger pulp abscess                                                 |
|    | XE1AR | All | Paronychia of finger                                                |
|    | XE1AS | All | Cellulitis and abscess of toe NOS                                   |
|    | XE1AT | All | Cellulitis and abscess of digit NOS                                 |
|    | XE1AU | All | Other cellulitis and abscess                                        |
|    | XE1AV | All | Cellulitis and abscess of cheek (external)                          |
|    | XE1AW | All | Cellulitis and abscess of nose (external)                           |
|    | XE1AX | All | Cellulitis and abscess of neck                                      |
|    | XE1AY | All | Cellulitis and abscess of hand excluding digits                     |
|    | XE1AZ | All | Cellulitis and abscess of hand unspecified                          |
|    | XE1Bc | All | (Carbuncle) &/or (boil) or (furuncle)                               |
|    | XE1Be | All | Boil: (face) or (external auditory) or (external ear)               |
|    | XE1Bg | All | (Boil - upper arm and forearm) or (axillary furunculosis)           |
|    | XE1Bi | All | (Cellulitis &/or abscess finger/toe) or (felon - whitlow)           |
|    | XE1BJ | All | Superficial folliculitis                                            |
|    | XE1Bk | All | (Cellulitis - finger-paronychia) or (paronychia)                    |
|    | XE1Bm | All | (Cellulitis/abscess: [NOS] or [other]) or (abscess NOS)             |
|    | XE1Bo | All | (Cellulitis/abscess - face) or (cellulitis - lips)                  |

|       |     |                                                                       |
|-------|-----|-----------------------------------------------------------------------|
| XE1Bq | All | Cellulitis -hand (& -excl. finger)                                    |
| XE1Bs | All | Cellulitis (&/or abscess): [buttock] or [perirectal]                  |
| XE1Bu | All | Cellulitis - foot (& - excl. toe)                                     |
| XE1Bw | All | (Impetigo) or (pemphigus neonatorum)                                  |
| XE1By | All | (Pilonidal: [sinus &/or cyst] or [abscess]) or (dimple - parasacral)  |
| XE1C0 | All | (Skin infection, localised NOS) or (pyoderma) or (pyogenic granuloma) |
| XE1C2 | All | (Skin infections NOS) or (perleche)                                   |
| XE1Cq | All | Folliculitis                                                          |
| XE2RI | All | Toe: [cellulitis] or [paronychia]                                     |
| XE2uC | All | Tuberculosis of skin and subcutaneous tissue                          |
| XE2uM | All | Dermatophytosis of foot                                               |
| XE2v1 | All | Multiple yaws papillomata                                             |
| XE2xh | All | Phthiriasis pubis                                                     |
| XM0pU | All | Tinea kerion of beard                                                 |
| XM0tp | All | Cellulitis of hand                                                    |
| XM0tr | All | Cellulitis of foot                                                    |
| XM1PT | All | Superficial bacterial infection of skin                               |
| XM1R0 | All | Acute abscess lymph node                                              |
| XSBpB | All | Abscess of hand                                                       |

**Supplementary table S5.7.** The case definitions for included Urinary tract infection.

| Urinary tract infection |         |                                             |
|-------------------------|---------|---------------------------------------------|
| Read V2 Code            | Term ID | Description                                 |
| K15..                   | All     | Cystitis                                    |
| K150.                   | All     | Acute cystitis                              |
| K151.                   | All     | Chronic interstitial cystitis               |
| K1510                   | All     | Hunner's ulcer                              |
| K1511                   | All     | Panmural fibrosis of bladder                |
| K1512                   | All     | Submucous cystitis                          |
| K151z                   | All     | Chronic interstitial cystitis NOS           |
| K152.                   | All     | Other chronic cystitis                      |
| K1520                   | All     | Subacute cystitis                           |
| K152y                   | All     | Chronic cystitis unspecified                |
| K152z                   | All     | Other chronic cystitis NOS                  |
| K153.                   | All     | Trigonitis                                  |
| K1530                   | All     | Acute trigonitis                            |
| K1531                   | All     | Chronic trigonitis                          |
| K1532                   | All     | Urethrotigonitis                            |
| K153z                   | All     | Trigonitis NOS                              |
| K154.                   | All     | Cystitis in diseases EC                     |
| K1540                   | All     | Cystitis in actinomycosis                   |
| K1541                   | All     | Cystitis in amoebiasis                      |
| K1542                   | All     | Cystitis in bilharziasis                    |
| K1543                   | All     | Cystitis in echinococcus infestation        |
| K1544                   | All     | Cystitis in diphtheria                      |
| K1545                   | All     | Cystitis in gonorrhoea                      |
| K1546                   | All     | Cystitis in moniliasis                      |
| K1547                   | All     | Cystitis in trichomoniasis                  |
| K1548                   | All     | Cystitis in tuberculosis                    |
| K154z                   | All     | Cystitis in diseases EC NOS                 |
| K155.                   | All     | Recurrent cystitis                          |
| K15y.                   | All     | Other specified cystitis                    |
| K15y0                   | All     | Cystitis cystica                            |
| K15y1                   | All     | Irradiation cystitis                        |
| K15y2                   | All     | Abscess of bladder                          |
| K15y3                   | All     | Malakoplakia of bladder                     |
| K15yz                   | All     | Other cystitis NOS                          |
| K15z.                   | All     | Cystitis NOS                                |
| K190.                   | All     | Urinary tract infection, site not specified |
| K1900                   | All     | Bacteriuria, site not specified             |
| K1901                   | All     | Pyuria, site not specified                  |

|                |         |                                                 |
|----------------|---------|-------------------------------------------------|
| K1902          | All     | Post operative urinary tract infection          |
| K1903          | All     | Recurrent urinary tract infection               |
| K1904          | All     | Chronic urinary tract infection                 |
| K1905          | All     | Urinary tract infection                         |
| K1906          | All     | Urosepsis                                       |
| K190X          | All     | Persistent proteinuria, unspecified             |
| K190z          | All     | Urinary tract infection, site not specified NOS |
| Read CTV3 Code | Term ID | Description                                     |
| A32y3          | All     | Diphtheritic cystitis                           |
| A9811          | All     | Acute gonococcal cystitis                       |
| A9831          | All     | Chronic gonococcal cystitis                     |
| K15..          | All     | Inflammation of bladder                         |
| K150.          | All     | NULL                                            |
| K151.          | All     | Chronic interstitial cystitis                   |
| K1510          | All     | Hunner's ulcer                                  |
| K1511          | All     | Panmural fibrosis of bladder                    |
| K1512          | All     | Submucous cystitis                              |
| K151z          | All     | Chronic interstitial cystitis NOS               |
| K152.          | All     | Other chronic cystitis                          |
| K1520          | All     | Subacute cystitis                               |
| K152y          | All     | Chronic cystitis unspecified                    |
| K152z          | All     | Other chronic cystitis NOS                      |
| K153.          | All     | (Trigonitis) or (follicular cystitis)           |
| K1530          | All     | Acute trigonitis                                |
| K1531          | All     | Chronic trigonitis                              |
| K1532          | All     | Urethrotrigonitis                               |
| K153z          | All     | Trigonitis NOS                                  |
| K154.          | All     | Cystitis in diseases EC                         |
| K1540          | All     | Actinomycotic cystitis                          |
| K1541          | All     | Amoebic cystitis                                |
| K1542          | All     | Schistosomiasis of bladder                      |
| K1543          | All     | Echinococcal cystitis                           |
| K1544          | All     | NULL                                            |
| K1545          | All     | Gonococcal cystitis                             |
| K1546          | All     | Monilial cystitis                               |
| K1547          | All     | Trichomonal cystitis                            |
| K1548          | All     | Tuberculous cystitis                            |
| K154z          | All     | Cystitis in diseases EC NOS                     |
| K155.          | All     | Recurrent cystitis                              |
| K15y.          | All     | Other specified cystitis                        |
| K15y0          | All     | Cystitis cystica                                |
| K15y1          | All     | Irradiation cystitis                            |

|    |       |     |                                                              |
|----|-------|-----|--------------------------------------------------------------|
| 1  |       |     |                                                              |
| 2  |       |     |                                                              |
| 3  |       |     |                                                              |
| 4  | K15y2 | All | Pyocystis                                                    |
| 5  | K15y3 | All | NULL                                                         |
| 6  | K15yz | All | Other cystitis NOS                                           |
| 7  | K15z. | All | Cystitis NOS                                                 |
| 8  |       |     |                                                              |
| 9  | K1632 | All | Diverticulitis of bladder                                    |
| 10 | K190. | All | Urinary tract infection: [site not specified] or [recurrent] |
| 11 | K1900 | All | Bacteriuria: [site not specified] or [asymptomatic]          |
| 12 | K1901 | All | Pyuria                                                       |
| 13 | K1902 | All | Postoperative urinary tract infection                        |
| 14 | K1903 | All | Recurrent urinary tract infection                            |
| 15 | K1904 | All | Chronic urinary tract infection                              |
| 16 | K1905 | All | NULL                                                         |
| 17 | K1906 | All | NULL                                                         |
| 18 | K190X | All | NULL                                                         |
| 19 | K190z | All | Urinary tract infection, site not specified NOS              |
| 20 | Kyu50 | All | [X]Other chronic cystitis                                    |
| 21 | Kyu51 | All | [X]Other cystitis                                            |
| 22 | X30Na | All | Recurrent cystitis - culture-negative                        |
| 23 | X30Nb | All | Chronic cystitis - culture negative                          |
| 24 | X30Nc | All | Chronic nonspecific cystitis                                 |
| 25 | X30Nd | All | Acute radiation cystitis                                     |
| 26 | X30Ne | All | Chronic radiation cystitis                                   |
| 27 | X30Nf | All | Chemical cystitis                                            |
| 28 | X30Ng | All | Leukoplakia of bladder                                       |
| 29 | X30Nh | All | Malakoplakia of bladder                                      |
| 30 | X30NV | All | Infective cystitis                                           |
| 31 | X30NX | All | Chronic infective cystitis                                   |
| 32 | X30NY | All | Non-infective cystitis                                       |
| 33 | X30NZ | All | Acute cystitis - culture-negative                            |
| 34 | X30Pa | All | Recurrent infective cystitis                                 |
| 35 | X30PZ | All | Acute culture positive cystitis                              |
| 36 | Xa0t3 | All | Amyloid of bladder                                           |
| 37 | Xa8EJ | All | Acute cystitis                                               |
| 38 | Xa8EK | All | Chronic cystitis                                             |
| 39 | XaA05 | All | Bullous cystitis                                             |
| 40 | XaB66 | All | Acute infective cystitis                                     |
| 41 | XaY6b | All | Follicular cystitis                                          |
| 42 | XE0dq | All | Trigonitis                                                   |
| 43 | XE0fX | All | Acute cystitis (& [recurrent])                               |
| 44 | XE0fZ | All | (Cystitis NOS) or (trigonitis)                               |
| 45 | XM0sZ | All | Acute recurrent cystitis                                     |
| 46 | XM10v | All | Infected diverticulum of bladder                             |
| 47 |       |     |                                                              |
| 48 |       |     |                                                              |
| 49 |       |     |                                                              |
| 50 |       |     |                                                              |
| 51 |       |     |                                                              |
| 52 |       |     |                                                              |
| 53 |       |     |                                                              |
| 54 |       |     |                                                              |
| 55 |       |     |                                                              |
| 56 |       |     |                                                              |
| 57 |       |     |                                                              |
| 58 |       |     |                                                              |
| 59 |       |     |                                                              |
| 60 |       |     |                                                              |

|       |     |                       |
|-------|-----|-----------------------|
| XM1Ox | All | Cystitis of pregnancy |
| XM1Us | All | Sterile pyuria        |

For peer review only

**Supplementary table S5.8.** The case definitions for included Genital infections.

| Genital infections |         |                                          |
|--------------------|---------|------------------------------------------|
| Read V2 Code       | Term ID | Description                              |
| AB21.              | All     | Candidal vulvovaginitis                  |
| AB210              | All     | Candidiasis of vulva                     |
| AB211              | All     | Candidiasis of vagina                    |
| AB21z              | All     | Candidal vulvovaginitis NOS              |
| AB22.              | All     | Other urogenital candidiasis             |
| AB220              | All     | Candidal balanitis                       |
| AB221              | All     | Perianal candidiasis                     |
| AB22z              | All     | Other urogenital candida NOS             |
| K17..              | All     | Urethritis due to non venereal causes    |
| K170.              | All     | Urethral and periurethral abscess        |
| K1700              | All     | Urethral abscess unspecified             |
| K1701              | All     | Bulbourethral gland abscess              |
| K1702              | All     | Urethral gland abscess                   |
| K1703              | All     | Periurethral cellulitis                  |
| K1704              | All     | Periurethral abscess                     |
| K170z              | All     | Urethral abscess NOS                     |
| K172.              | All     | Candidal urethritis                      |
| K17y2              | All     | Skene's glands adenitis                  |
| K17y3              | All     | Cowperitis                               |
| K17y4              | All     | Urethral meatitis                        |
| K17y6              | All     | Verumontanitis                           |
| K17y7              | All     | Utriculus masculinus                     |
| K17yz              | All     | Other urethritis NOS                     |
| K17z.              | All     | Urethritis due to non venereal cause NOS |
| Read CTV3 Code     | Term ID | Description                              |
| AB21.              | All     | Candidal vulvovaginitis                  |
| XE0SH              | All     | Candidal vulvovaginitis NOS              |
| X407o              | All     | Streptococcal vulvovaginitis             |
| X407r              | All     | Chlamydial vulvovaginitis                |
| K4212              | All     | Vulvovaginitis unspecified               |
| K4216              | All     | Vulvovaginitis in diseases EC            |
| Xa16P              | All     | Infective vulvitis                       |
| X4087              | All     | Vulval amoebiasis                        |
| AB210              | All     | Candidiasis of vulva                     |
| X407h              | All     | Infective vaginitis                      |
| AB211              | All     | Vaginal candidiasis                      |
| Xa0Er              | All     | Trichomonal vaginitis                    |
| X407i              | All     | Bacterial vaginosis                      |
| X4080              | All     | Vaginal vault infection                  |
| AB22.              | All     | Other urogenital candidiasis             |
| AB22z              | All     | Other urogenital candida NOS             |



|       |     |                                     |
|-------|-----|-------------------------------------|
| XaBjl | All | Infective balanitis                 |
| X4007 | All | Bacterial balanitis                 |
| X4008 | All | Anaerobic balanitis                 |
| X400A | All | Mycoplasma balanitis                |
| XE0SI | All | Candidal balanitis                  |
| A05y1 | All | Amoebic balanitis                   |
| X70Qk | All | Anogenital candidiasis              |
| XE0SJ | All | Perianal candidiasis                |
| X70Qo | All | Anal candidiasis                    |
| X70Qj | All | Candida infection of genital region |
| X407N | All | Candidiasis of cervix               |
| X70Qn | All | Penile candidiasis                  |
| XE0SI | All | Candidal balanitis                  |
| X30Oy | All | Infective urethritis                |
| XE0dt | All | Non-venereal urethritis             |
| X30P3 | All | Tuberculous urethritis              |
| X30P6 | All | Urethral abscess                    |
| K1700 | All | Urethral abscess unspecified        |
| K170z | All | Urethral abscess NOS                |
| K17y2 | All | Skene's glands adenitis             |
| K17y3 | All | Cowperitis                          |
| K17y4 | All | Urethral meatitis                   |
| X30PD | All | Male accessory gland infection      |
| K17y6 | All | Verumontanitis                      |
| K17yz | All | Other urethritis NOS                |
| K1703 | All | Periurethral cellulitis             |
| K1704 | All | Periurethral abscess                |

**Supplementary table S5.9.** The case definitions for included Gastrointestinal infection.

| <b>Gastrointestinal infection</b> |                |                                               |
|-----------------------------------|----------------|-----------------------------------------------|
| <b>Read V2 Code</b>               | <b>Term ID</b> | <b>Description</b>                            |
| 19G..                             | All            | Diarrhoea and vomiting                        |
| 1J8..                             | All            | Suspected food poisoning                      |
| A0...                             | All            | Intestinal infectious diseases                |
| A00..                             | All            | Cholera                                       |
| A000.                             | All            | Cholera - <i>Vibrio cholerae</i>              |
| A001.                             | All            | Cholera - <i>Vibrio cholerae</i> El Tor       |
| A00z.                             | All            | Cholera NOS                                   |
| A01..                             | All            | Typhoid and paratyphoid fevers                |
| A010.                             | All            | Typhoid fever                                 |
| A011.                             | All            | Paratyphoid fever A                           |
| A012.                             | All            | Paratyphoid fever B                           |
| A013.                             | All            | Paratyphoid fever C                           |
| A01z.                             | All            | Paratyphoid fever NOS                         |
| A02..                             | All            | Other salmonella infections                   |
| A020.                             | All            | <i>Salmonella</i> gastroenteritis             |
| A021.                             | All            | <i>Salmonella</i> septicaemia                 |
| A022.                             | All            | Localised salmonella infection                |
| A0220                             | All            | Local salmonella infection unspecified        |
| A0221                             | All            | <i>Salmonella</i> meningitis                  |
| A0222                             | All            | <i>Salmonella</i> pneumonia                   |
| A0223                             | All            | <i>Salmonella</i> arthritis                   |
| A0224                             | All            | <i>Salmonella</i> osteomyelitis               |
| A022z                             | All            | Other local salmonella infection              |
| A023.                             | All            | <i>Salmonella</i> sepsis                      |
| A02y.                             | All            | Other specified salmonella infection          |
| A02z.                             | All            | <i>Salmonella</i> infection NOS               |
| A03..                             | All            | Shigellosis                                   |
| A030.                             | All            | <i>Shigella dysenteriae</i> (group A)         |
| A031.                             | All            | <i>Shigella flexneri</i> (group B)            |
| A032.                             | All            | <i>Shigella boydii</i> (group C)              |
| A033.                             | All            | <i>Shigella sonnei</i> (group D)              |
| A03y.                             | All            | Other specified shigella infection            |
| A03z.                             | All            | Shigellosis NOS                               |
| A04..                             | All            | Other bacterial food poisoning                |
| A040.                             | All            | Staphylococcal food poisoning                 |
| A041.                             | All            | Botulism                                      |
| A042.                             | All            | <i>Clostridium perfringens</i> food poisoning |
| A043.                             | All            | Other clostridia causing food poisoning       |
| A044.                             | All            | <i>Vibrio parahaemolyticus</i> food poisoning |
| A04y.                             | All            | Other specified bacterial food poisoning      |

|       |     |                                                            |
|-------|-----|------------------------------------------------------------|
| A04y0 | All | Foodborne Bacillus cereus intoxication                     |
| A04z. | All | Food poisoning NOS                                         |
| A05.. | All | Amoebiasis                                                 |
| A050. | All | Acute amoebic dysentery                                    |
| A051. | All | Chronic intestinal amoebiasis                              |
| A052. | All | Amoebic nondysenteric colitis                              |
| A053. | All | Amoebic liver abscess                                      |
| A054. | All | Amoebic lung abscess                                       |
| A055. | All | Amoebic brain abscess                                      |
| A056. | All | Amoebic skin ulceration                                    |
| A05y. | All | Amoebic infection of other sites                           |
| A05y0 | All | Amoebic appendicitis                                       |
| A05y1 | All | Amoebic balanitis                                          |
| A05y2 | All | Amoeboma                                                   |
| A05yz | All | Amoebic infection of other sites NOS                       |
| A05z. | All | Amoebiasis NOS                                             |
| A06.. | All | Other protozoal intestinal diseases                        |
| A060. | All | Balantidiasis                                              |
| A061. | All | Giardiasis - Lambliasis                                    |
| A062. | All | Coccidiosis                                                |
| A063. | All | Intestinal trichomoniasis                                  |
| A064. | All | Cryptosporidiosis                                          |
| A06y. | All | Other specified protozoal intestinal diseases              |
| A06z. | All | Protozoal intestinal diseases NOS                          |
| A07.. | All | Intestinal infection due to other organisms                |
| A070. | All | Escherichia coli gastrointestinal tract infection          |
| A0700 | All | Enteropathogenic Escherichia coli infection                |
| A0701 | All | Enterotoxigenic Escherichia coli infection                 |
| A0702 | All | Enteroinvasive Escherichia coli infection                  |
| A0703 | All | Enterohaemorrhagic Escherichia coli infection              |
| A071. | All | Arizona paracolon gastrointestinal tract infection         |
| A072. | All | Aerobacter aerogenes gastrointestinal tract infection      |
| A073. | All | Proteus gastrointestinal tract infection                   |
| A0730 | All | Proteus mirabilis gastrointestinal tract infection         |
| A0731 | All | Proteus morganii gastrointestinal tract infection          |
| A073z | All | Proteus gastrointestinal tract infection NOS               |
| A074. | All | Other specified gastrointestinal tract bacterial infection |
| A0740 | All | Staphylococcal gastrointestinal tract infection            |
| A0741 | All | Pseudomonas gastrointestinal tract infection               |
| A0743 | All | Campylobacter gastrointestinal tract infection             |
| A0744 | All | Enteritis due to Yersinia enterocolitica                   |
| A0745 | All | Helicobacter pylori gastrointestinal tract infection       |
| A074y | All | Other specified other gastrointestinal infection           |
| A074z | All | Other specified gastrointestinal tract infections NOS      |
| A075. | All | Unspecified bacterial enteritis                            |

|    |       |     |                                                                       |
|----|-------|-----|-----------------------------------------------------------------------|
| 1  |       |     |                                                                       |
| 2  |       |     |                                                                       |
| 3  |       |     |                                                                       |
| 4  | A076. | All | Enteritis due to specified virus                                      |
| 5  | A0760 | All | Enteritis due to adenovirus                                           |
| 6  | A0761 | All | Enteritis due to enterovirus                                          |
| 7  | A0762 | All | Enteritis due to rotavirus                                            |
| 8  | A0763 | All | Enteritis due to norovirus                                            |
| 9  | A076z | All | Enteritis due to specified virus NOS                                  |
| 10 | A07y. | All | Gastrointestinal tract infection due to specified organism NEC        |
| 11 | A07y0 | All | Viral gastroenteritis                                                 |
| 12 | A07y1 | All | Infantile viral gastroenteritis                                       |
| 13 | A07z. | All | Gastrointestinal tract infection due to specified organism NOS        |
| 14 | A08.. | All | Ill-defined intestinal tract infections                               |
| 15 | A080. | All | Infectious colitis, enteritis and gastroenteritis                     |
| 16 | A0801 | All | Infectious colitis                                                    |
| 17 | A0802 | All | Infectious enteritis                                                  |
| 18 | A0803 | All | Infectious gastroenteritis                                            |
| 19 | A0804 | All | Catarrhal dysentery                                                   |
| 20 | A0805 | All | Haemorrhagic dysentery                                                |
| 21 | A080z | All | Infectious colitis, enteritis and gastroenteritis NOS                 |
| 22 | A081. | All | Colitis, enteritis and gastroenteritis presumed infectious            |
| 23 | A0810 | All | Colitis - presumed infectious origin                                  |
| 24 | A0811 | All | Enteritis - presumed infectious origin                                |
| 25 | A0812 | All | Gastroenteritis - presumed infectious origin                          |
| 26 | A081z | All | Colitis, enteritis and gastroenteritis presumed infectious origin NOS |
| 27 | A082. | All | Infectious diarrhoea                                                  |
| 28 | A0820 | All | Dysenteric diarrhoea                                                  |
| 29 | A0821 | All | Epidemic diarrhoea                                                    |
| 30 | A082z | All | Infectious diarrhoea NOS                                              |
| 31 | A083. | All | Diarrhoea of presumed infectious origin                               |
| 32 | A08z. | All | Ill defined gastrointestinal tract infections NOS                     |
| 33 | A0y.. | All | Other specified infectious diseases of intestinal tract               |
| 34 | A0z.. | All | Intestinal tract infectious disease NOS                               |
| 35 | A3Ay2 | All | Clostridium difficile infection                                       |
| 36 | A78y1 | All | Epidemic vomiting syndrome                                            |
| 37 | Ayu00 | All | [X]Cholera, unspecified                                               |
| 38 | Ayu04 | All | [X]Other shigellosis                                                  |
| 39 | Ayu05 | All | [X]Shigellosis, unspecified                                           |
| 40 | Ayu07 | All | [X]Bacterial intestinal infection, unspecified                        |
| 41 | Ayu0F | All | [X]Viral intestinal infection, unspecified                            |
| 42 | Ayu0H | All | [X]Diarrhoea and gastroenteritis of presumed infectious origin        |
| 43 | J43.. | All | Other non-infective inflammatory gastroenteritis and colitis          |
| 44 | J43z. | All | Other non-infective gastroenteritis and colitis NOS                   |
| 45 |       |     |                                                                       |
| 46 |       |     |                                                                       |
| 47 |       |     |                                                                       |
| 48 |       |     |                                                                       |
| 49 |       |     |                                                                       |
| 50 |       |     |                                                                       |
| 51 |       |     |                                                                       |
| 52 |       |     |                                                                       |
| 53 |       |     |                                                                       |
| 54 |       |     |                                                                       |
| 55 |       |     |                                                                       |
| 56 |       |     |                                                                       |
| 57 |       |     |                                                                       |
| 58 |       |     |                                                                       |
| 59 |       |     |                                                                       |
| 60 |       |     |                                                                       |

| Read CTV3 Code | Term ID | Description                                                                                  |
|----------------|---------|----------------------------------------------------------------------------------------------|
| 19G..          | All     | NULL                                                                                         |
| 1J8..          | All     | NULL                                                                                         |
| A0...          | All     | (Intestinal infectious diseases) or (food poisoning [& (bacterial)]) or (infective vomiting) |
| A00..          | All     | (Cholera) or (Vibrio cholerae)                                                               |
| A000.          | All     | Cholera - Vibrio cholerae                                                                    |
| A001.          | All     | Cholera - Vibrio cholerae O1 El Tor biotype                                                  |
| A00z.          | All     | Cholera NOS                                                                                  |
| A01..          | All     | Typhoid and paratyphoid fevers                                                               |
| A010.          | All     | Fever: [typhoid] or [enteric]                                                                |
| A011.          | All     | Paratyphoid A                                                                                |
| A012.          | All     | Paratyphoid B                                                                                |
| A013.          | All     | Paratyphoid C                                                                                |
| A01z.          | All     | Paratyphoid fever NOS                                                                        |
| A02..          | All     | Other salmonella infections                                                                  |
| A020.          | All     | Salmonellosis (& [gastroenteritis] or [food poisoning])                                      |
| A021.          | All     | Salmonella septicaemia                                                                       |
| A022.          | All     | Localised salmonella infection                                                               |
| A0220          | All     | Local salmonella infection unspecified                                                       |
| A0221          | All     | NULL                                                                                         |
| A0222          | All     | Salmonella pneumonia                                                                         |
| A0223          | All     | Salmonella arthritis                                                                         |
| A0224          | All     | Salmonella osteomyelitis                                                                     |
| A022z          | All     | Other local salmonella infection                                                             |
| A023.          | All     | NULL                                                                                         |
| A02y.          | All     | Other specified salmonella infection                                                         |
| A02z.          | All     | Salmonella infection NOS                                                                     |
| A03..          | All     | Shigellosis                                                                                  |
| A030.          | All     | (Shigella dysenteriae - group A) or (bacillary dysentery)                                    |
| A031.          | All     | Shigella flexneri (group B)                                                                  |
| A032.          | All     | Shigella boydii (group C)                                                                    |
| A033.          | All     | Shigella sonnei: [group D] or [bacillary dysentery]                                          |
| A03y.          | All     | Other specified shigella infection                                                           |
| A03z.          | All     | Shigellosis NOS                                                                              |
| A04..          | All     | Other bacterial food poisoning                                                               |
| A040.          | All     | Staphylococcal food poisoning                                                                |
| A041.          | All     | NULL                                                                                         |
| A042.          | All     | Clostridium perfringens food poisoning                                                       |
| A043.          | All     | Other Clostridia causing food poisoning                                                      |
| A044.          | All     | Vibrio parahaemolyticus food poisoning                                                       |
| A04y.          | All     | Other specified bacterial food poisoning                                                     |
| A04y0          | All     | NULL                                                                                         |
| A04z.          | All     | Food poisoning NOS                                                                           |
| A05..          | All     | Amoebiasis                                                                                   |

|       |     |                                                                                         |
|-------|-----|-----------------------------------------------------------------------------------------|
| A050. | All | Acute amoebic dysentery                                                                 |
| A051. | All | Chronic intestinal amoebiasis                                                           |
| A052. | All | Amoebic nondysenteric colitis                                                           |
| A053. | All | Amoebic liver abscess                                                                   |
| A054. | All | Amoebic lung abscess                                                                    |
| A055. | All | Amoebic brain abscess                                                                   |
| A056. | All | Amoebic ulcer of skin                                                                   |
| A05y. | All | Amoebic infection of other sites                                                        |
| A05y0 | All | Amoebic appendicitis                                                                    |
| A05y1 | All | Amoebic balanitis                                                                       |
| A05y2 | All | Amoeboma                                                                                |
| A05yz | All | Amoebic infection of other sites NOS                                                    |
| A05z. | All | Amoebiasis NOS                                                                          |
| A06.. | All | Other protozoal intestinal diseases                                                     |
| A060. | All | Balantidiasis                                                                           |
| A061. | All | Giardiasis: [lambliasis] or [colitis]                                                   |
| A062. | All | Coccidiosis (& [intestinal])                                                            |
| A063. | All | Trichomonas hominis infection                                                           |
| A064. | All | NULL                                                                                    |
| A06y. | All | Other specified protozoal intestinal diseases                                           |
| A06z. | All | Protozoal intestinal diseases NOS                                                       |
| A07.. | All | Intestinal infection due to other organisms                                             |
| A070. | All | Escherichia coli gastrointestinal tract infection                                       |
| A0700 | All | NULL                                                                                    |
| A0701 | All | NULL                                                                                    |
| A0702 | All | NULL                                                                                    |
| A0703 | All | NULL                                                                                    |
| A071. | All | Arizona paracolon gastrointestinal tract infection                                      |
| A072. | All | Aerobacter aerogenes gastrointestinal tract infection                                   |
| A073. | All | Proteus gastrointestinal tract infection                                                |
| A0730 | All | Proteus mirabilis gastrointestinal tract infection                                      |
| A0731 | All | Morganella morganii gastrointestinal tract infection                                    |
| A073z | All | Proteus gastrointestinal tract infection NOS                                            |
| A074. | All | Other specified gastrointestinal tract bacterial infection                              |
| A0740 | All | Staphylococcal: [GIT infection] or [diarrhoea] or [toxin diarrhoea]                     |
| A0741 | All | Pseudomonas: [GIT infection] or [pyocyanea diarrhoea]                                   |
| A0743 | All | (Campylobacter GIT infection (& [diarrhoea] or [enteritis]) or (helicobacter gastritis) |
| A0744 | All | NULL                                                                                    |
| A0745 | All | NULL                                                                                    |
| A074y | All | Other specified other gastrointestinal infection                                        |
| A074z | All | Other specified gastrointestinal tract infections NOS                                   |
| A075. | All | Unspecified bacterial enteritis                                                         |

|       |     |                                                                                     |
|-------|-----|-------------------------------------------------------------------------------------|
| A076. | All | (Specified virus enteritis) or (viral: [diarrhoea] or [vomiting])                   |
| A0760 | All | Enteritis due to adenovirus                                                         |
| A0761 | All | Enteritis due to enterovirus                                                        |
| A0762 | All | Enteritis due to rotavirus                                                          |
| A0763 | All | NULL                                                                                |
| A076z | All | Enteritis due to specified virus NOS                                                |
| A07y. | All | Gastrointestinal tract infection due to specified organism NEC                      |
| A07y0 | All | Viral gastroenteritis                                                               |
| A07y1 | All | NULL                                                                                |
| A07z. | All | Gastrointestinal tract infection due to specified organism NOS                      |
| A08.. | All | (Ill-defined GIT infections) or (gastric flu)                                       |
| A080. | All | Infectious colitis, enteritis and gastroenteritis                                   |
| A0801 | All | Infective colitis                                                                   |
| A0802 | All | Infective enteritis                                                                 |
| A0803 | All | Infectious gastroenteritis                                                          |
| A0804 | All | Catarrhal dysentery                                                                 |
| A0805 | All | Haemorrhagic dysentery                                                              |
| A080z | All | Infectious colitis, enteritis and gastroenteritis NOS                               |
| A081. | All | Colitis and enteritis (& [gastroenteritis]) presumed infectious                     |
| A0810 | All | Colitis - presumed infectious origin                                                |
| A0811 | All | Enteritis - presumed infectious origin                                              |
| A0812 | All | Gastroenteritis - presumed infectious origin                                        |
| A081z | All | Colitis, enteritis and gastroenteritis presumed infectious origin NOS               |
| A082. | All | Diarrhoea: [infectious] or [travellers]                                             |
| A0820 | All | Dysenteric diarrhoea                                                                |
| A0821 | All | (Epidemic diarrhoea) or (viral gastroenteritis)                                     |
| A082z | All | Infectious diarrhoea NOS                                                            |
| A083. | All | (Infectious diarrhoea: [presumed] or [? & vomiting]) or (infantile gastroenteritis) |
| A08z. | All | Ill-defined gastrointestinal tract infections NOS                                   |
| A0y.. | All | Other specified infectious diseases of intestinal tract                             |
| A0z.. | All | Intestinal tract infectious disease NOS                                             |
| A3Ay2 | All | Clostridium difficile infection                                                     |
| A78y1 | All | Epidemic vomiting syndrome                                                          |
| Ayu00 | All | [X]Cholera, unspecified                                                             |
| Ayu04 | All | [X]Other shigellosis                                                                |
| Ayu05 | All | [X]Shigellosis, unspecified                                                         |
| Ayu07 | All | [X]Bacterial intestinal infection, unspecified                                      |
| Ayu0F | All | [X]Viral intestinal infection, unspecified                                          |
| Ayu0H | All | [X]Diarrhoea and gastroenteritis of presumed infectious origin                      |

|       |     |                                                                                                       |
|-------|-----|-------------------------------------------------------------------------------------------------------|
| H24y6 | All | Typhoid pneumonia                                                                                     |
| J43.. | All | (Gastroenteriti) or (enterocolitis) or (other non-infective inflammatory gastroenteritis and colitis) |
| J43z. | All | (Chronic diarrhoea) or (other non-infective gastroenteritis and colitis NOS)                          |
| X301R | All | Helicobacter gastritis                                                                                |
| X303g | All | Colitis,enteritis ? infectious                                                                        |
| X303I | All | Amoebic colitis                                                                                       |
| X303n | All | Fulminant amoebic colitis                                                                             |
| X303q | All | Cytomegaloviral colitis                                                                               |
| X30Bc | All | Prototheca diarrhoea                                                                                  |
| X30Bd | All | Food poisoning                                                                                        |
| X30BN | All | Gastroenteritis                                                                                       |
| X30BP | All | Vomiting - infective                                                                                  |
| X30BR | All | Adenoviral gastroenteritis                                                                            |
| X30BS | All | Rotavirus gastroenteritis                                                                             |
| X30BT | All | Norwalk virus gastroenteritis                                                                         |
| X30BU | All | Small round structured virus gastroenteritis                                                          |
| X30BX | All | Dysentery                                                                                             |
| X70Ft | All | Infantile gastroenteritis                                                                             |
| X70Fv | All | Bacterial food poisoning                                                                              |
| X70Fw | All | Bacillus cereus food poisoning                                                                        |
| X70Ge | All | Asymptomatic amoebic infection                                                                        |
| X70Gf | All | Symptomatic non-invasive amoebic infection                                                            |
| X70Gg | All | Amoebic toxic megacolon                                                                               |
| X70Gi | All | Amoebic perianal ulceration                                                                           |
| X70GJ | All | Cholera - Vibrio cholerae O1 Classical biotype                                                        |
| X70GK | All | Cholera - non-O1 group vibrio                                                                         |
| X70GL | All | Cholera - O139 group Vibrio cholerae                                                                  |
| X70GN | All | Enterotoxigenic Escherichia coli gastrointestinal tract infection                                     |
| X70GO | All | Travellers' diarrhoea                                                                                 |
| X70Gp | All | Cryptosporidiosis                                                                                     |
| X70GP | All | Enteropathogenic Escherichia coli gastrointestinal tract infection                                    |
| X70GQ | All | Verotoxigenic Escherichia coli gastrointestinal tract infection                                       |
| X70GR | All | Enteroinvasive Escherichia coli gastrointestinal tract infection                                      |
| X70GS | All | Enteroadherent Escherichia coli gastrointestinal tract infection                                      |
| X70GZ | All | Yersinia enterocolitis                                                                                |
| X73Mv | All | Vibrio cholerae                                                                                       |
| Xa01t | All | Recurrent salmonella septicaemia                                                                      |
| Xa2Vc | All | Astrovirus gastroenteritis                                                                            |
| Xa2Vd | All | Calicivirus gastroenteritis                                                                           |



|       |     |                                                                                                      |
|-------|-----|------------------------------------------------------------------------------------------------------|
| Xa3dy | All | Specific gastrointestinal infectious disease                                                         |
| Xa8ES | All | Acute infective gastroenteritis                                                                      |
| Xa8I7 | All | Salmonella food poisoning                                                                            |
| Xa97W | All | Cholera - O1 group <i>Vibrio cholerae</i>                                                            |
| Xa97X | All | <i>Staphylococcus aureus</i> food poisoning                                                          |
| XaB5z | All | Enterocolitis                                                                                        |
| XaBE5 | All | <i>Helicobacter pylori</i> gastrointestinal tract infection                                          |
| XaBLu | All | Infantile viral gastroenteritis                                                                      |
| XaDbT | All | Fungal gastroenteritis                                                                               |
| XalnX | All | Suspected food poisoning                                                                             |
| XaREr | All | Enteritis due to norovirus                                                                           |
| XaYaf | All | Sepsis due to <i>Salmonella</i>                                                                      |
| XE0aj | All | Other non-infective inflammatory gastroenteritis and colitis                                         |
| XE0an | All | Other non-infective gastroenteritis and colitis NOS                                                  |
| XE0Qc | All | Cholera                                                                                              |
| XE0Qd | All | Typhoid fever                                                                                        |
| XE0Qe | All | <i>Salmonella</i> gastroenteritis                                                                    |
| XE0Qf | All | <i>Shigella dysenteriae</i> (group A)                                                                |
| XE0Qg | All | <i>Shigella sonnei</i> (group D)                                                                     |
| XE0Qi | All | Intestinal coccidiosis                                                                               |
| XE0Qj | All | Staphylococcal gastrointestinal tract infection                                                      |
| XE0Qk | All | <i>Pseudomonas</i> gastrointestinal tract infection                                                  |
| XE0Ql | All | <i>Campylobacter</i> gastrointestinal tract infection                                                |
| XE0Qm | All | Enteritis due to specified virus                                                                     |
| XE0Qn | All | Ill-defined intestinal tract infections                                                              |
| XE0Qo | All | Colitis, enteritis and gastroenteritis presumed infectious                                           |
| XE0Qp | All | Epidemic diarrhoea                                                                                   |
| XE0Qq | All | Diarrhoea of presumed infectious origin                                                              |
| XE0Sm | All | (Intestinal infectious diseases) or (unspecified enteritis)                                          |
| XE0Ss | All | (Bacillary dysentery) or (shigellosis)                                                               |
| XE0Su | All | Giardiasis (& [colitis])                                                                             |
| XE0Sw | All | (OS GIT infections) or (botulism) or ( <i>Campylobacter</i> enteritis)                               |
| XE0Sy | All | Viral: [ill-defined GIT infections (& diarrhoea)] or [gastroenteritis]                               |
| XE0T0 | All | (Gastroenteritis (& [viral NOS])) or (vomiting: [viral] or [& diarrhoea infection]) or (gastric flu) |
| XE0T2 | All | Infectious: [intestinal disease NOS] or [diarrhoea NOS]                                              |
| XM0pJ | All | Bacterial gastroenteritis                                                                            |
| XM0pK | All | Bacillary dysentery                                                                                  |

Supplementary table S5.10. The case definitions for included Herpes simplex.

| <b>Herpes simplex</b> |                |                                                      |
|-----------------------|----------------|------------------------------------------------------|
| <b>Read V2 Code</b>   | <b>Term ID</b> | <b>Description</b>                                   |
| A54..                 | All            | Herpes simplex                                       |
| A540.                 | All            | Eczema herpeticum - Kaposi's varicelliform eruption  |
| A541.                 | All            | Genital herpes simplex                               |
| A5410                 | All            | Genital herpes unspecified                           |
| A5411                 | All            | Herpetic vulvovaginitis                              |
| A5412                 | All            | Herpetic ulceration of vulva                         |
| A5413                 | All            | Herpetic infection of penis                          |
| A5414                 | All            | Herpesviral infection of perianal skin and rectum    |
| A5415                 | All            | Anogenital herpesviral infection                     |
| A5416                 | All            | Genital herpes simplex type 1                        |
| A5417                 | All            | Genital herpes simplex type 2                        |
| A5418                 | All            | Recurrent genital herpes simplex type 1              |
| A5419                 | All            | Recurrent genital herpes simplex type 2              |
| A541z                 | All            | Genital herpes simplex NOS                           |
| A542.                 | All            | Herpetic gingivostomatitis                           |
| A543.                 | All            | Herpetic meningoencephalitis                         |
| A544.                 | All            | Ophthalmic herpes simplex                            |
| A5440                 | All            | Unspecified ophthalmic herpes                        |
| A5441                 | All            | Herpes simplex eyelid dermatitis                     |
| A5442                 | All            | Herpes simplex dendritic keratitis                   |
| A5443                 | All            | Herpes simplex disciform keratitis                   |
| A5444                 | All            | Herpes simplex iridocyclitis                         |
| A5445                 | All            | Herpes simplex ophthalmicus                          |
| A544z                 | All            | Ophthalmic herpes simplex NOS                        |
| A545.                 | All            | Herpes simplex septicaemia                           |
| A546.                 | All            | Herpes simplex whitlow                               |
| A548.                 | All            | [X] Herpes labialis                                  |
| A54x.                 | All            | Herpes simplex with other specified complication     |
| A54x0                 | All            | Visceral herpes simplex                              |
| A54x1                 | All            | Herpes simplex meningitis                            |
| A54x2                 | All            | Herpes simplex otitis externa                        |
| A54x3                 | All            | Herpesviral vesicular dermatitis                     |
| A54x4                 | All            | Herpes simplex pneumonia                             |
| A54xz                 | All            | Herpes simplex with other specified complication NOS |
| A54y.                 | All            | Herpes simplex with unspecified complication         |
| A54z.                 | All            | Herpes simplex no complication NOS                   |
| <b>Read CTV3 Code</b> | <b>Term ID</b> | <b>Description</b>                                   |
| A54..                 | All            | (Herpes simplex [& viral infection]) or (scumpox)    |
| A540.                 | All            | Eczema herpeticum                                    |
| A541.                 | All            | Genital herpes                                       |
| A5410                 | All            | Genital herpes unspecified (& [simplex group])       |

|       |     |                                                              |
|-------|-----|--------------------------------------------------------------|
| A5411 | All | Herpetic vulvovaginitis                                      |
| A5412 | All | Herpetic ulceration of vulva                                 |
| A5413 | All | Herpetic infection of penis                                  |
| A5414 | All | Herpesviral infection of perianal skin and rectum            |
| A5415 | All | Anogenital herpesviral infection                             |
| A5416 | All | NULL                                                         |
| A5417 | All | NULL                                                         |
| A5418 | All | NULL                                                         |
| A5419 | All | NULL                                                         |
| A541z | All | Genital herpes simplex NOS                                   |
| A542. | All | Herpetic: [gingivostomatitis] or [cold sore] or [stomatitis] |
| A543. | All | (Herpetic meningoencephalitis) or (Simian B disease)         |
| A544. | All | Ophthalmic herpes simplex                                    |
| A5440 | All | Unspecified ophthalmic herpes (& [simplex group])            |
| A5441 | All | Herpes simplex eyelid dermatitis                             |
| A5442 | All | Herpes simplex dendritic keratitis                           |
| A5443 | All | Herpes simplex disciform keratitis                           |
| A5444 | All | Herpes simplex iridocyclitis                                 |
| A5445 | All | NULL                                                         |
| A544z | All | Ophthalmic herpes simplex NOS                                |
| A545. | All | Herpes simplex septicaemia                                   |
| A546. | All | Herpes simplex whitlow                                       |
| A548. | All | NULL                                                         |
| A54x. | All | Herpes simplex with other specified complication             |
| A54x0 | All | Visceral herpes simplex                                      |
| A54x1 | All | NULL                                                         |
| A54x2 | All | NULL                                                         |
| A54x3 | All | Herpesviral vesicular dermatitis                             |
| A54x4 | All | NULL                                                         |
| A54xz | All | Herpes simplex with other specified complication NOS         |
| A54y. | All | Herpes simplex with unspecified complication                 |
| A54z. | All | Herpes: [simplex, no complication NOS] or [labialis]         |
| Ayu4G | All | [X]Anogenital herpes viral infection, unspecified            |
| F5015 | All | Herpes simplex otitis externa                                |
| X100g | All | Herpes simplex pneumonia                                     |
| X70Ja | All | Herpes simiae infection                                      |
| X70JU | All | Primary anogenital herpes                                    |
| X70JV | All | Recurrent anogenital herpes                                  |
| XaPEC | All | Genital herpes simplex type 1 infection                      |
| XaPED | All | Genital herpes simplex type 2 infection                      |
| XaPER | All | Recurrent genital herpes simplex type 1 infection            |
| XaPES | All | Recurrent genital herpes simplex type 2 infection            |
| XEORB | All | Herpes simplex infection                                     |
| XEORC | All | Herpetic gingivostomatitis                                   |
| XEORD | All | Herpes simplex encephalitis                                  |

|       |     |                                                         |
|-------|-----|---------------------------------------------------------|
| XE0RE | All | Herpes simplex no complication NOS                      |
| XE0TO | All | (Herpes simplex (& [type 1] or [type 2])) or (scrumpox) |
| XE2vG | All | Genital herpes unspecified                              |
| XE2vH | All | Unspecified ophthalmic herpes                           |
| XM02r | All | Herpes labialis                                         |

For peer review only

Supplementary table S5.11. The case definitions for included Herpes zoster.

| <b>Herpes zoster</b>  |                |                                                                         |
|-----------------------|----------------|-------------------------------------------------------------------------|
| <b>Read V2 Code</b>   | <b>Term ID</b> | <b>Description</b>                                                      |
| A53..                 | All            | Herpes zoster                                                           |
| A530.                 | All            | Herpes zoster with meningitis                                           |
| A531.                 | All            | Herpes zoster with other central nervous system complication            |
| A5310                 | All            | Herpes zoster with other central nervous system complications           |
| A5311                 | All            | Geniculate herpes zoster                                                |
| A5312                 | All            | Postherpetic trigeminal neuralgia                                       |
| A5313                 | All            | Postherpetic polyneuropathy                                             |
| A5314                 | All            | Zoster encephalitis                                                     |
| A5315                 | All            | Postzoster neuralgia                                                    |
| A531z                 | All            | Herpes zoster with other central nervous system complication NOS        |
| A532.                 | All            | Herpes zoster with ophthalmic complication                              |
| A5320                 | All            | Herpes zoster with dermatitis of eyelid                                 |
| A5321                 | All            | Herpes zoster with keratoconjunctivitis                                 |
| A5322                 | All            | Herpes zoster iridocyclitis                                             |
| A5323                 | All            | Ophthalmic herpes zoster infection                                      |
| A5324                 | All            | Herpes zoster ophthalmicus                                              |
| A532z                 | All            | Herpes zoster with other ophthalmic complication                        |
| A53x.                 | All            | Herpes zoster with other specified complication                         |
| A53x0                 | All            | Herpes zoster otitis externa                                            |
| A53x1                 | All            | Disseminated zoster                                                     |
| A53xz                 | All            | Herpes zoster with other specified complication NOS                     |
| A53y.                 | All            | Herpes zoster with unspecified complication                             |
| A53z.                 | All            | Herpes zoster NOS                                                       |
| <b>Read CTV3 Code</b> | <b>Term ID</b> | <b>Description</b>                                                      |
| A53..                 | All            | Herpes zoster [organism] or [infection - shingles]                      |
| A530.                 | All            | NULL                                                                    |
| A531.                 | All            | (Herpes zoster with other CNS complication) or (postherpetic neuralgia) |
| A5310                 | All            | NULL                                                                    |
| A5311                 | All            | (Geniculate herpes zoster) or (Ramsey Hunt syndrome)                    |
| A5312                 | All            | NULL                                                                    |
| A5313                 | All            | Post-herpetic polyneuropathy                                            |
| A5314                 | All            | NULL                                                                    |
| A5315                 | All            | NULL                                                                    |
| A531z                 | All            | Herpes zoster with other central nervous system complication NOS        |
| A532.                 | All            | Herpes zoster with ophthalmic complication                              |
| A5320                 | All            | Herpes zoster with dermatitis of eyelid                                 |
| A5321                 | All            | Herpes zoster with keratoconjunctivitis                                 |
| A5322                 | All            | Herpes zoster iridocyclitis                                             |
| A5323                 | All            | Ophthalmic herpes zoster infection                                      |
| A5324                 | All            | NULL                                                                    |

|       |     |                                                     |
|-------|-----|-----------------------------------------------------|
| A53z  | All | Herpes zoster with other ophthalmic complication    |
| A53x. | All | Herpes zoster with other specified complication     |
| A53x0 | All | NULL                                                |
| A53x1 | All | Disseminated zoster                                 |
| A53xz | All | Herpes zoster with other specified complication NOS |
| A53y. | All | Herpes zoster with unspecified complication         |
| A53z. | All | Herpes zoster NOS                                   |

For peer review only

Supplementary table S5.12. The case definitions for included Meningitis.

| <b>Herpes zoster</b> |                |                                                            |
|----------------------|----------------|------------------------------------------------------------|
| <b>Read V2 Code</b>  | <b>Term ID</b> | <b>Description</b>                                         |
| F00..                | All            | Bacterial meningitis                                       |
| F000.                | All            | Haemophilus meningitis                                     |
| F001.                | All            | Pneumococcal meningitis                                    |
| F002.                | All            | Streptococcal meningitis                                   |
| F003.                | All            | Staphylococcal meningitis                                  |
| F004.                | All            | Meningitis - tuberculous                                   |
| F005.                | All            | Meningitis - meningococcal                                 |
| F007.                | All            | Meningitis in other bacterial disease classified elsewhere |
| F0070                | All            | Meningitis due to gonococcus                               |
| F0071                | All            | Meningitis due to listeriosis                              |
| F0072                | All            | Meningitis due to neurosyphilis                            |
| F0073                | All            | Meningitis due to salmonella                               |
| F0074                | All            | Meningitis due to congenital syphilis                      |
| F0075                | All            | Meningitis due to secondary syphilis                       |
| F0076                | All            | Meningitis due to typhoid fever                            |
| F0077                | All            | Meningitis due to actinomycosis                            |
| F0078                | All            | Meningitis due to pertussis                                |
| F007z                | All            | Unspecified meningitis in bacterial disease EC             |
| F00y.                | All            | Other specified bacterial meningitis                       |
| F00y0                | All            | Meningitis due to aerobacter aerogenes                     |
| F00y1                | All            | Meningitis due to bacillus pyocyaneus                      |
| F00y2                | All            | Meningitis due to escherichia coli                         |
| F00y3                | All            | Meningitis due to Friedlander bacillus                     |
| F00y4                | All            | Meningitis due to klebsiella pneumoniae                    |
| F00y5                | All            | Meningitis due to proteus morgani                          |
| F00y6                | All            | Meningitis due to pseudomonas                              |
| F00yz                | All            | Other specified bacterial meningitis NOS                   |
| F00z.                | All            | Bacterial meningitis NOS                                   |
| F01..                | All            | Meningitis due to other organisms                          |
| F010.                | All            | Meningitis due to fungal organisms                         |
| F0100                | All            | Meningitis due to cryptococcus                             |
| F010z                | All            | Other fungal meningitis                                    |
| F011.                | All            | Meningitis due to viral organisms EC                       |
| F0110                | All            | Meningitis due to coxsackie virus                          |
| F0111                | All            | Meningitis due to ECHO virus                               |
| F0112                | All            | Meningitis due to herpes zoster virus                      |
| F0113                | All            | Meningitis due to herpes simplex virus                     |
| F0114                | All            | Meningitis due to mumps virus                              |
| F0115                | All            | Meningitis due to lymphocytic choriomeningitis virus       |
| F0116                | All            | Meningitis due to adenovirus                               |
| F0117                | All            | Varicella meningitis                                       |

|                       |                |                                                                             |
|-----------------------|----------------|-----------------------------------------------------------------------------|
| F011y                 | All            | Other viral meningitis                                                      |
| F011z                 | All            | Meningitis - viral NOS                                                      |
| F012.                 | All            | Meningitis due to trypanosomiasis                                           |
| F013.                 | All            | Meningitis due to sarcoidosis                                               |
| F01y.                 | All            | Other non-bacterial meningitis                                              |
| F01y0                 | All            | Meningitis due to leptospira                                                |
| F01yz                 | All            | Other non-bacterial meningitis NOS                                          |
| F01z.                 | All            | Meningitis due to organism NOS                                              |
| F02..                 | All            | Meningitis of unspecified cause                                             |
| F020.                 | All            | Nonpyogenic meningitis                                                      |
| F02z.                 | All            | Unspecified meningitis                                                      |
| F03X.                 | All            | Bacterial meningoencephalitis and meningomyelitis, not elsewhere classified |
| A543.                 | 00             | Herpetic meningoencephalitis                                                |
| AD00.                 | 00             | Toxoplasma meningoencephalitis                                              |
| A1303                 | 00             | Tuberculous meningoencephalitis                                             |
| A1302                 | 00             | Tuberculous leptomeningitis                                                 |
| <b>Read CTV3 Code</b> | <b>Term ID</b> | <b>Description</b>                                                          |
| X000H                 | All            | Meningitis                                                                  |
| XaDmS                 | All            | Infective meningitis                                                        |
| F00..                 | All            | Bacterial meningitis                                                        |
| F0077                 | All            | Actinomycotic meningitis                                                    |
| F00y0                 | All            | Aerobacter meningitis                                                       |
| F00y2                 | All            | Escherichia coli meningitis                                                 |
| F0070                 | All            | Gonococcal meningitis                                                       |
| F000.                 | All            | Haemophilus meningitis                                                      |
| F00y4                 | All            | Klebsiella meningitis                                                       |
| F00y3                 | All            | Meningitis due to Friedlander bacillus                                      |
| F0071                 | All            | Listeria meningitis                                                         |
| X000R                 | All            | Meningitis in Lyme disease                                                  |
| F005.                 | All            | Meningococcal meningitis                                                    |
| F0078                 | All            | Meningitis due to pertussis                                                 |
| A206.                 | All            | Plague meningitis                                                           |
| F001.                 | All            | Pneumococcal meningitis                                                     |
| Xa9B4                 | All            | Proteus meningitis                                                          |
| F00y6                 | All            | Pseudomonas meningitis                                                      |
| F00y1                 | All            | Meningitis due to bacillus pyocyaneus                                       |
| F0073                 | All            | Salmonella meningitis                                                       |
| F0076                 | All            | Meningitis due to typhoid fever                                             |
| F003.                 | All            | Staphylococcal meningitis                                                   |
| X000P                 | All            | Staphylococcus aureus meningitis                                            |
| X000Q                 | All            | Staphylococcus epidermidis meningitis                                       |
| F002.                 | All            | Streptococcal meningitis                                                    |
| Xa7pz                 | All            | Syphilitic meningitis                                                       |
| F0074                 | All            | Congenital syphilitic meningitis                                            |



|       |     |                                                            |
|-------|-----|------------------------------------------------------------|
| X000T | All | Late congenital syphilitic meningitis                      |
| F0075 | All | Secondary syphilitic meningitis                            |
| A9180 | All | Acute secondary syphilitic meningitis                      |
| F004. | All | Tuberculous meningitis                                     |
| A1300 | All | Tuberculosis of cerebral meninges                          |
| A1301 | All | Tuberculosis of spinal meninges                            |
| A1302 | All | Tuberculous leptomeningitis                                |
| A130z | All | Tuberculous meningitis NOS                                 |
| AA0y0 | All | Leptospiral meningitis                                     |
| F007. | All | Meningitis in other bacterial disease classified elsewhere |
| F0072 | All | Meningitis due to neurosyphilis                            |
| F007z | All | Unspecified meningitis in bacterial disease EC             |
| F00y. | All | Other specified bacterial meningitis                       |
| F00yz | All | Other specified bacterial meningitis NOS                   |
| F00y5 | All | Morganella morganii meningitis                             |
| F00z. | All | Bacterial meningitis NOS                                   |
| Fyu00 | All | [X]Other bacterial meningitis                              |
| Xa9B5 | All | Viral meningitis                                           |
| A4z1. | All | Adenoviral meningitis                                      |
| A4z0. | All | Lymphocytic choriomeningitis                               |
| F0114 | All | Mumps meningitis                                           |
| X000M | All | Postmeasles meningitis                                     |
| F0112 | All | Meningitis due to herpes zoster virus                      |
| F0113 | All | Herpes simplex meningitis                                  |
| A42.. | All | Enteroviral meningitis                                     |
| F0110 | All | Coxsackie viral meningitis                                 |
| X000J | All | Coxsackie A viral meningitis                               |
| X000K | All | Coxsackie B viral meningitis                               |
| F0111 | All | Echovirus meningitis                                       |
| X000L | All | Chronic echovirus meningoencephalitis                      |
| A42y. | All | Other specified viral meningitis                           |
| Ayu8C | All | [X]Other viral meningitis                                  |
| Ayu8D | All | [X]Viral meningitis, unspecified                           |
| F011. | All | Meningitis due to viral organisms EC                       |
| F011y | All | Other viral meningitis                                     |
| Fyu01 | All | [X]Meningitis in viral diseases classified elsewhere       |
| XE0R7 | All | Viral meningitis NOS                                       |
| XE15A | All | Meningitis - viral NOS                                     |
| F010. | All | Fungal meningitis                                          |
| AB2y2 | All | Candidal meningitis                                        |
| F0100 | All | Cryptococcal meningitis                                    |
| AB32. | All | Coccidioidal meningitis                                    |
| F010z | All | Other fungal meningitis                                    |
| Fyu02 | All | [X]Meningitis in mycoses classified elsewhere              |

|       |       |                                                                                         |
|-------|-------|-----------------------------------------------------------------------------------------|
| X000V | All   | Parasitic meningitis                                                                    |
| F012. | All   | Meningitis due to trypanosomiasis                                                       |
| F01.. | All   | Meningitis due to other organisms                                                       |
| F01y. | All   | Other non-bacterial meningitis                                                          |
| F01yz | All   | Other non-bacterial meningitis NOS                                                      |
| F01z. | All   | Meningitis due to organism NOS                                                          |
| Fyu03 | All   | [X]Meningitis in other specified infectious and parasitic diseases classified elsewhere |
| F02.. | All   | Meningitis of unspecified cause                                                         |
| F020. | All   | Non-pyogenic meningitis                                                                 |
| F02z. | All   | Unspecified meningitis                                                                  |
| Fyu04 | All   | [X]Meningitis due to other specified causes                                             |
| X001F | All   | Listeria meningoencephalitis                                                            |
| XE0RD | All   | Herpetic meningoencephalitis                                                            |
| F0334 | Y71kx | Toxoplasma meningoencephalitis                                                          |
| A1303 | All   | Tuberculous meningoencephalitis                                                         |
| X001N | Y00Ck | PAM - Primary amoebic meningoencephalitis                                               |
| Fyu05 | YMACn | [X]Bacterial meningoencephalitis and meningomyelitis, not elsewhere classified          |

## References

1. Abuabara K, Magyari AM, Hoffstad O, Jabbar-Lopez ZK, Smeeth L, Williams HC, et al. Development and Validation of an Algorithm to Accurately Identify Atopic Eczema Patients in Primary Care Electronic Health Records from the UK. *Journal of Investigative Dermatology*. 2017;137(8):1655-62.
2. Hoang U, Liyanage H, Coyle R, Godden C, Jones S, Blair M, et al. Determinants of inter-practice variation in childhood asthma and respiratory infections: cross-sectional study of a national sentinel network. *BMJ open*. 2019;9(1):e024372-e.
3. McGovern A, Hinton W, Correa A, Munro N, Whyte M, de Lusignan S. Real-world evidence studies into treatment adherence, thresholds for intervention and disparities in treatment in people with type 2 diabetes in the UK. *BMJ open*. 2016;6(11):e012801.
4. Muller S, Hider SL, Raza K, Stack RJ, Hayward RA, Mallen CD. An algorithm to identify rheumatoid arthritis in primary care: a Clinical Practice Research Datalink study. *BMJ open*. 2015;5(12):e009309.
