# Supplementary material for: Epidemiology, management and the associated burden of mental health illness, atopic and autoimmune conditions, and common infections in alopecia areata: protocol for an observational study series
Source: PubMed Central journal article supplement — BMJ Open. 2021 Nov 16;11(11):e045718. doi: 10.1136/bmjopen-2020-045718 (PMC8596050; doi:10.1136/bmjopen-2020-045718), 2021-11-16
Supplement: bmjopen-2020-045718supp002.pdf [file bmjopen-2020-045718supp002.pdf]

## Additional File 2

### **The epidemiology, management, and the associated burden of mental health illness, atopic and autoimmune conditions, and common infections in alopecia areata: Protocol for an observational study series**

Dr Matthew Harries, Dr Abby Macbeth, Dr Susan Holmes, Professor Andrew R Thompson, Dr Wing Sin Chui, Dr William Romero Gallardo, Professor Andrew G Messenger, Dr Christos Tziotzios, Professor Simon de Lusignan

## Codes used to define alopecia areata and related clinical conditions, dermatology referrals, and treatments for alopecia areata which may be issued in primary care

**Supplementary table S1.1.** Read codes to be used to identify cases of alopecia areata, non-specified alopecia and alternative diagnoses (exclusion diagnoses).

| <b>Alopecia Areata</b>       |                |                           |
|------------------------------|----------------|---------------------------|
| <b>Read V2 Code</b>          | <b>Term ID</b> | <b>Description</b>        |
| M2401                        | All            | Alopecia areata           |
| M240B                        | All            | Alopecia totalis          |
| M240K                        | All            | Alopecia universalis      |
| M240U                        | All            | Ophiasis                  |
| Myu62                        | All            | [X]Other alopecia areata  |
| <b>Read CTV3 Code</b>        | <b>Term ID</b> | <b>Description</b>        |
| XE1BH                        | All            | Alopecia areata           |
| M240D                        | All            | Ophiasic alopecia areata  |
| M240B                        | All            | Total alopecia areata     |
| X509h                        | All            | Alopecia universalis      |
| X590h                        | All            | Universal alopecia areata |
| Myu62                        | All            | [x]Other alopecia areata  |
| <b>Non-specific alopecia</b> |                |                           |
| <b>Read V2 Code</b>          | <b>Term ID</b> | <b>Description</b>        |
| M240.                        | All            | Alopecia                  |
| M2400                        | All            | Alopecia unspecified      |
| M2408                        | All            | Alopecia localis          |
| M2409                        | All            | Alopecia disseminata      |
| M240z                        | All            | Alopecia NOS              |
| 22D7.                        | All            | O/E - alopecia            |
| <b>Read CTV3 Code</b>        | <b>Term ID</b> | <b>Description</b>        |
| XE2Qa                        | All            | Alopecia                  |
| X75wD                        | All            | Partial loss of hair      |
| X509c                        | All            | Non-scarring alopecia     |
| M2409                        | All            | Diffuse alopecia          |
| X509e                        | All            | Circumscribed alopecia    |
| M2408                        | All            | Alopecia localis          |
| M240z                        | All            | Alopecia NOS              |
| XE1BG                        | All            | Alopecia unspecified      |
| XM1YG                        | All            | O/E - alopecia            |

|                          |                |                                          |
|--------------------------|----------------|------------------------------------------|
| XE1h9                    | All            | O/E - patches of alopecia                |
| <b>Scarring alopecia</b> |                |                                          |
| <b>Read V2 Code</b>      | <b>Term ID</b> | <b>Description</b>                       |
| M240Q                    | All            | Pseudopelade                             |
| M147.                    | All            | Erosive pustular dermatosis of the scalp |
| M24X.                    | All            | Cicatricial alopecia, unspecified        |
| M240R                    | All            | Lichen planopilaris                      |
| M240P                    | All            | Alopecia mucinosa                        |
| M2yF.                    | All            | Follicular mucinosis                     |
| M240S                    | All            | Folliculitis decalvans                   |
| M240T                    | All            | Folliculitis ulerythematosa reticulata   |
| X7055                    | All            | Linear morphoea                          |
| M2440                    | All            | Dissecting cellulitis of scalp           |
| M261K                    | All            | Acne keloidalis                          |
| M261J                    | All            | Acne necrotica                           |
| M2448                    | All            | Perifolliculitis capitis abscedens       |
| M2447                    | All            | Perifolliculitis of scalp                |
| <b>Read CTV3 Code</b>    | <b>Term ID</b> | <b>Description</b>                       |
| X509i                    | All            | Scarring alopecia                        |
| X509i                    | All            | Cicatricial alopecia                     |
| X50Eo                    | All            | Lipoedematous alopecia                   |
| X509j                    | All            | Alopecia parvimaculata                   |
| X509k                    | All            | Pseudopelade                             |
| X509l                    | All            | Tufted folliculitis                      |
| X509m                    | All            | Erosive pustular dermatosis of the scalp |
| X509n                    | All            | Traumatic alopecia                       |
| M240C                    | All            | Alopecia follicularis                    |
| Myu65                    | All            | [X]Other cicatricial alopecia            |
| Myu6E                    | All            | [X]Cicatricial alopecia, unspecified     |
| X507b                    | All            | Lichen planopilaris                      |
| X507i                    | All            | Lichen planopilaris of scalp             |
| X50Ff                    | All            | Alopecia mucinosa                        |
| XaQbR                    | All            | Follicular mucinosis                     |
| X500w                    | All            | Folliculitis decalvans                   |
| X5076                    | All            | Keratitis pilaris decalvans              |
| M21y5                    | All            | Folliculitis ulerythematosa reticulata   |
| X500x                    | All            | Folliculitis keloidalis                  |
| M2104                    | All            | Linear scleroderma                       |
| M2440                    | All            | Folliculitis abscedens et suffodiens     |
| X50Es                    | All            | Acne necrotica                           |
| X50Eq                    | All            | Keloidalis nuchae                        |
| M2440                    | All            | Dissecting cellulitis of scalp           |
| M2448                    | All            | Perifolliculitis capitis abscedens       |

|                                       |                |                                                               |
|---------------------------------------|----------------|---------------------------------------------------------------|
| M2447                                 | All            | Perifolliculitis of scalp                                     |
| <b>Congenital alopecia</b>            |                |                                                               |
| <b>Read V2 Code</b>                   | <b>Term ID</b> | <b>Description</b>                                            |
| PH40.                                 | All            | Congenital alopecia                                           |
| PH400                                 | All            | Congenital alopecia, unspecified                              |
| PH401                                 | All            | Congenital localised alopecia                                 |
| PH402                                 | All            | Congenital generalised alopecia                               |
| PH40z                                 | All            | Congenital alopecia NOS                                       |
| <b>Read CTV3 Code</b>                 | <b>Term ID</b> | <b>Description</b>                                            |
| XE1MR                                 | All            | Congenital alopecia                                           |
| X78De                                 | All            | Total congenital alopecia                                     |
| X78Df                                 | All            | Congenital alopecia with keratin cysts                        |
| PH401                                 | All            | Congenital localised alopecia                                 |
| PH40z                                 | All            | Congenital alopecia NOS                                       |
| XE1MS                                 | All            | Congenital generalised alopecia                               |
| PH400                                 | All            | Congenital alopecia, unspecified                              |
| <b>Traction or traumatic alopecia</b> |                |                                                               |
| <b>Read V2 Code</b>                   | <b>Term ID</b> | <b>Description</b>                                            |
| M240V                                 | All            | Traction alopecia                                             |
| <b>Read CTV3 Code</b>                 | <b>Term ID</b> | <b>Description</b>                                            |
| Ua1AS                                 | All            | Traction alopecia                                             |
| X509n                                 | All            | Traumatic alopecia                                            |
| X503h                                 | All            | Friction alopecia                                             |
| <b>Androgenetic alopecia</b>          |                |                                                               |
| <b>Read V2 Code</b>                   | <b>Term ID</b> | <b>Description</b>                                            |
| M2402                                 | All            | Male pattern alopecia                                         |
| M2403                                 | All            | Frontal alopecia of women                                     |
| 7G140                                 | All            | Hair bearing skin flap to scalp for male pattern baldness     |
| 7G1E.                                 | All            | Hair bearing graft of skin to scalp for male pattern baldness |
| 7G1E0                                 | All            | Hair bearing punch graft to scalp for male pattern baldness   |
| 7G1E1                                 | All            | Hair bearing strip graft to scalp for male pattern baldness   |
| 7G1E2                                 | All            | Hair bearing graft to scalp for male pattern baldness NEC     |
| <b>Read CTV3 Code</b>                 | <b>Term ID</b> | <b>Description</b>                                            |
| M2402                                 | Y50P7          | Androgenetic alopecia                                         |
| M2402                                 | Y50P8          | Male pattern alopecia                                         |
| M2402                                 | Y57P9          | Male pattern baldness                                         |
| M2402                                 | Y57PA          | Pattern baldness                                              |
| M2403                                 | All            | Frontal alopecia of women                                     |
| X509f                                 | All            | Involutional alopecia                                         |
| 7G140                                 | All            | Hair bearing skin flap to scalp for male pattern baldness     |

|                           |                |                                                               |
|---------------------------|----------------|---------------------------------------------------------------|
| 7G1E0                     | All            | Hair bearing punch graft to scalp for male pattern baldness   |
| XM1JM                     | All            | Hair bearing graft of skin to scalp for male pattern baldness |
| 7G1E2                     | All            | Hair bearing graft to scalp for male pattern baldness NEC     |
| 7G1E1                     | All            | Hair bearing strip graft to scalp for male pattern baldness   |
| <b>Telogen effluvium</b>  |                |                                                               |
| <b>Read V2 Code</b>       | <b>Term ID</b> | <b>Description</b>                                            |
| M240M                     | All            | Telogen effluvium                                             |
| <b>Read CTV3 Code</b>     | <b>Term ID</b> | <b>Description</b>                                            |
| X509q                     | All            | Telogen effluvium                                             |
| <b>Anagen effluvium</b>   |                |                                                               |
| <b>Read V2 Code</b>       | <b>Term ID</b> | <b>Description</b>                                            |
| M240N                     | All            | Anagen effluvium                                              |
| <b>Read CTV3 Code</b>     | <b>Term ID</b> | <b>Description</b>                                            |
| M240N                     | All            | Anagen effluvium                                              |
| <b>Tinea capitis</b>      |                |                                                               |
| <b>Read V2 Code</b>       | <b>Term ID</b> | <b>Description</b>                                            |
| AB00.                     | 00             | Dermatophytosis of scalp or beard                             |
| AB00.                     | 11             | Kerion                                                        |
| AB000                     | 00             | Dermatophytosis of scalp                                      |
| AB000                     | 11             | Tinea Capitis                                                 |
| AB00z                     | 00             | Dermatophytosis of scalp or beard NOS                         |
| <b>Read CTV3 Code</b>     | <b>Term ID</b> | <b>Description</b>                                            |
| AB000                     | All            | Tinea capitis                                                 |
| AB000                     | Y71oW          | Scalp ringworm                                                |
| AB000                     | Y71oX          | Dermatophytosis of scalp                                      |
| AB000                     | Y71oY          | Tinea capitis                                                 |
| AB000                     | Y71oZ          | Black dot ringworm                                            |
| AB000                     | Y71od          | Tinea tonsurans                                               |
| AB000                     | Ya6oA          | Tinea of the scalp                                            |
| X70QN                     | All            | Favus                                                         |
| X70QN                     | Y71ob          | Favus                                                         |
| X70QN                     | Y71oc          | Tinea favosa                                                  |
| X70QM                     | All            | Suppurative ringworm                                          |
| XE0SA                     | All            | Dermatophytosis of scalp or beard                             |
| AB00z                     | All            | Dermatophytosis of scalp or beard NOS                         |
| <b>Secondary syphilis</b> |                |                                                               |
| <b>Read V2 Code</b>       | <b>Term ID</b> | <b>Description</b>                                            |
| A913.                     | All            | Secondary syphilis of skin or mucus membranes                 |
| A9133                     | All            | Secondary syphilis of skin                                    |
| A913z                     | All            | Secondary syphilis of skin or mucus membranes NOS             |

|                         |                |                                                   |
|-------------------------|----------------|---------------------------------------------------|
| A9181                   | All            | Syphilitic alopecia                               |
| <b>Read CTV3 Code</b>   | <b>Term ID</b> | <b>Description</b>                                |
| A913.                   | All            | Secondary syphilis of skin and mucous membrane    |
| A9133                   | All            | Secondary syphilis of skin                        |
| A913z                   | All            | Secondary syphilis of skin or mucus membranes NOS |
| A9181                   | All            | Syphilitic alopecia                               |
| <b>Trichotillomania</b> |                |                                                   |
| <b>Read V2 Code</b>     | <b>Term ID</b> | <b>Description</b>                                |
| Eu633                   | All            | [X]Trichotillomania                               |
| <b>Read CTV3 Code</b>   | <b>Term ID</b> | <b>Description</b>                                |
| Eu633                   | All            | Trichotillomania                                  |

**Supplementary table S1.2.** Read codes to identify the extent of alopecia. The extent of disease will be considered to be that of the category recorded with the greatest extent

| <b>Alopecia Areata (Category: Localised)</b>   |                |                           |
|------------------------------------------------|----------------|---------------------------|
| <b>Read V2 Code</b>                            | <b>Term ID</b> | <b>Description</b>        |
| M2401                                          | All            | Alopecia areata           |
| M240U                                          | All            | Ophiasis                  |
| Myu62                                          | All            | [X]Other alopecia areata  |
| <b>Read CTV3 Code</b>                          | <b>Term ID</b> | <b>Description</b>        |
| XE1BH                                          | All            | Alopecia areata           |
| M240D                                          | All            | Ophiasic alopecia areata  |
| Myu62                                          | All            | [x]Other alopecia areata  |
| <b>Alopecia Areata (Category: Totalis)</b>     |                |                           |
| <b>Read V2 Code</b>                            | <b>Term ID</b> | <b>Description</b>        |
| M240B                                          | All            | Alopecia totalis          |
| <b>Read CTV3 Code</b>                          | <b>Term ID</b> | <b>Description</b>        |
| M240B                                          | All            | Total alopecia areata     |
| <b>Alopecia Areata (Category: Universalis)</b> |                |                           |
| <b>Read V2 Code</b>                            | <b>Term ID</b> | <b>Description</b>        |
| M240K                                          | All            | Alopecia universalis      |
| <b>Read CTV3 Code</b>                          | <b>Term ID</b> | <b>Description</b>        |
| X509h                                          | All            | Alopecia universalis      |
| X590h                                          | All            | Universal alopecia areata |

**Supplementary table S1.3.** Read codes to identify dermatology referrals.

| <b>Dermatology referrals</b> |                |                                                               |
|------------------------------|----------------|---------------------------------------------------------------|
| <b>Read V2 Code</b>          | <b>Term ID</b> | <b>Description</b>                                            |
| 8HJD.                        | All            | Dermatology self-referral                                     |
| 8H43.                        | All            | Dermatological referral                                       |
| 8H4S.                        | All            | Referral to dermatology special interest general practitioner |
| 8HHX.                        | All            | Referral to dermatology nurse specialist                      |
| 8HVI.                        | All            | Private referral to dermatologist                             |
| 8Hkq.                        | All            | Referral to community dermatology service                     |
| 8Hm0.                        | All            | Referral to dermatology clinical assessment service           |
| 8HM3.                        | All            | Listed for Dermatology admisn                                 |
| 8H3I.                        | All            | Non-urgent dermatology admisn.                                |
| 8HIJ4                        | All            | Internal practice dermatology referral                        |
| 8T0D.                        | All            | Referral to paediatric dermatology service                    |
| <b>Read CTV3 Code</b>        | <b>Term ID</b> | <b>Description</b>                                            |
| 8H43.                        | All            | Dermatological referral                                       |
| XaZJ0                        | All            | Referral to teledermatology service                           |
| XaXsX                        | All            | Referral to community dermatology service                     |
| 8HJD.                        | All            | Dermatology self-referral                                     |
| XaBTS                        | All            | Referral to dermatologist                                     |
| 8HVI.                        | All            | Private referral to dermatologist                             |
| Xaaln                        | All            | Internal practice dermatology referral                        |
| XaKCB                        | All            | Referral to dermatology nurse specialist                      |
| XaXsX                        | All            | Referral to community dermatology service                     |
| Xaacp                        | All            | Referral to paediatric dermatology service                    |
| XaAeq                        | All            | Referral for dermatology domiciliary visit                    |
| XaLqL                        | All            | Referral to dermatology special interest general practitioner |
| XaQKh                        | All            | Referral to dermatology clinical assessment service           |
| 8HK3.                        | All            | Dermatology D.V. requested                                    |
| XaAeq                        | All            | Referral for dermatology DV                                   |



**Supplementary table S1.4.** Medications which may be issued in primary care for the treatment of alopecia areata.

\* topical steroids will be grouped by potency; mild, moderate, potent, and very potent.

| <b>Medication group</b> | <b>Examples</b>                                                                                                  |
|-------------------------|------------------------------------------------------------------------------------------------------------------|
| Topical steroids*       | Hydrocortisone, Bethamethasone, Fluocinolone acetonide, Clobetasol proprionate, Clobetasone butyrate, Mometasone |
| Minoxidil               | Minoxidil                                                                                                        |
| Systemic steroids       | Prednisolone                                                                                                     |
| Dithranol               | Dithranol                                                                                                        |

## Codes used to identify mental health conditions and treatments

**Supplementary table S2.1.** Algorithms used to identify anxiety (non-phobia related anxiety disorder), depression episodes, recurrent major depression, agoraphobia, adjustment disorder self-harm and parasuicide.

Expressions in capitals equate to Boolean expressions. \*More than 1 year ago. SSRIs = selective serotonin reuptake inhibitors, TCA = tricyclic antidepressants, MAOI = monoamine oxidase inhibitors, CBT = cognitive behavioural therapy.

| Clinical entity               | ICD 10 code | Definition                                                                                                                                                                 |
|-------------------------------|-------------|----------------------------------------------------------------------------------------------------------------------------------------------------------------------------|
| Depressive episodes           | F32         | Any coded depressive episode (Supplementary table S2.2) AND concurrent treatment for depression                                                                            |
| Recurrent depressive disorder | F33         | (Any historical code* for a depressive episode [table S2.2] AND current treatment for depression) OR Any code for recurrent depressive disorder (Supplementary table S2.3) |
| Anxiety disorder              | F41         | Any coded anxiety episode (Supplementary table S2.4) AND concurrent treatment for anxiety                                                                                  |
| Adjustment disorder           | F43.2       | Any diagnosis code for adjustment disorder (Supplementary table S2.5)                                                                                                      |
| Agoraphobia                   | F40.0       | Any diagnosis code for agoraphobia (Supplementary table S2.6)                                                                                                              |
| Self-harm                     | NA          | Any diagnosis code or other strongly indicative code for self-harm (Supplementary table S2.7)                                                                              |
| Parasuicide                   | NA          | Any diagnosis code or other strongly indicative code for parasuicide including overdose (Supplementary tables S2.8 and S2.9)                                               |
| Depression treatments         | NA          | SSRIs, TCAs, MAOIs, counselling, CBT, and psychotherapy (Supplementary table S2.10)                                                                                        |
| Anxiety treatments            | NA          | SSRIs, anxiolytics, counselling, CBT, and psychotherapy (Supplementary table S2.10)                                                                                        |

**Supplementary table S2.2.** Read codes used to identify depression episodes.

| <b>Depression episodes</b> |                |                                                                           |
|----------------------------|----------------|---------------------------------------------------------------------------|
| <b>Read V2 Code</b>        | <b>Term ID</b> | <b>Description</b>                                                        |
| E0013                      | All            | Presenile dementia with depression                                        |
| E0021                      | All            | Senile dementia with depression                                           |
| E112.                      | All            | Single major depressive episode                                           |
| E1120                      | All            | Single major depressive episode, unspecified                              |
| E1121                      | All            | Single major depressive episode, mild                                     |
| E1122                      | All            | Single major depressive episode, moderate                                 |
| E1123                      | All            | Single major depressive episode, severe, without mention of psychosis     |
| E1124                      | All            | Single major depressive episode, severe, with psychosis                   |
| E1125                      | All            | Single major depressive episode, in partial or unspecified remission      |
| E1126                      | All            | Single major depressive episode, in full remission                        |
| E112z                      | All            | Single major depressive episode NOS                                       |
| E113.                      | All            | Recurrent major depressive episode                                        |
| E1130                      | All            | Recurrent major depressive episodes, unspecified                          |
| E1131                      | All            | Recurrent major depressive episodes, mild                                 |
| E1132                      | All            | Recurrent major depressive episodes, moderate                             |
| E1133                      | All            | Recurrent major depressive episodes, severe, without mention of psychosis |
| E1134                      | All            | Recurrent major depressive episodes, severe, with psychosis               |
| E1137                      | All            | Recurrent depressive disorder                                             |
| E113z                      | All            | Recurrent major depressive episode NOS                                    |
| E118.                      | All            | Seasonal affective disorder                                               |
| E11y2                      | All            | Atypical depressive disorder                                              |
| E11z2                      | All            | Masked depression                                                         |
| E130.                      | All            | Reactive depressive psychosis                                             |
| E135.                      | All            | Agitated depression                                                       |
| E2003                      | All            | Anxiety with depression                                                   |
| E291.                      | All            | Prolonged depressive reaction                                             |
| E2B..                      | All            | Depressive disorder NEC                                                   |
| E2B1.                      | All            | Chronic depression                                                        |
| E2B0.                      | All            | Postviral depression                                                      |
| Eu204                      | All            | [X]Post-schizophrenic depression                                          |
| Eu251                      | All            | [X]Schizoaffective disorder, depressive type                              |
| Eu32.                      | All            | [X]Depressive episode                                                     |
| Eu320                      | All            | [X]Mild depressive episode                                                |
| Eu321                      | All            | [X]Moderate depressive episode                                            |
| Eu322                      | All            | [X]Severe depressive episode without psychotic symptoms                   |
| Eu323                      | All            | [X]Severe depressive episode with psychotic symptoms                      |
| Eu324                      | All            | [X]Mild depression                                                        |
| Eu325                      | All            | [X]Major depression, mild                                                 |
| Eu326                      | All            | [X]Major depression, moderately severe                                    |

|                       |                |                                                                                     |
|-----------------------|----------------|-------------------------------------------------------------------------------------|
| Eu327                 | All            | [X]Major depression, severe without psychotic symptoms                              |
| Eu328                 | All            | [X]Major depression, severe with psychotic symptoms                                 |
| Eu32y                 | All            | [X]Other depressive episodes                                                        |
| Eu32z                 | All            | [X]Depressive episode, unspecified                                                  |
| Eu33.                 | All            | [X]Recurrent depressive disorder                                                    |
| Eu330                 | All            | [X]Recurrent depressive disorder, current episode mild                              |
| Eu331                 | All            | [X]Recurrent depressive disorder, current episode moderate                          |
| Eu332                 | All            | [X]Recurrent depressive disorder, current episode severe without psychotic symptoms |
| Eu333                 | All            | [X]Recurrent depressive disorder, current episode severe with psychotic symptoms    |
| Eu334                 | All            | [X]Recurrent depressive disorder, currently in remission                            |
| Eu33y                 | All            | [X]Other recurrent depressive disorders                                             |
| Eu33z                 | All            | [X]Recurrent depressive disorder, unspecified                                       |
| Eu412                 | All            | [X]Mixed anxiety and depressive disorder                                            |
| <b>Read CTV3 Code</b> | <b>Term ID</b> | <b>Description</b>                                                                  |
| X00Sb                 | All            | Mixed anxiety and depressive disorder                                               |
| X00SO                 | All            | Depressive disorder                                                                 |
| X761L                 | All            | Seasonal affective disorder                                                         |
| Xa0wV                 | All            | Recurrent brief depressive disorder                                                 |
| X00SQ                 | All            | Agitated depression                                                                 |
| XE1YC                 | All            | Reactive depression                                                                 |
| X00SR                 | All            | Endogenous depression                                                               |
| X00SS                 | All            | Endogenous depression first episode                                                 |
| XE1Y0                 | All            | Single major depressive episode                                                     |
| E1120                 | All            | Single major depressive episode, unspecified                                        |
| E1120                 | All            | Single major depressive episode, unspecified                                        |
| E1121                 | All            | Single major depressive episode, mild                                               |
| E1122                 | All            | Single major depressive episode, moderate                                           |
| E1123                 | All            | Single major depressive episode, severe, without mention of psychosis               |
| E1124                 | All            | Single major depressive episode, severe, with psychosis                             |
| XaX53                 | All            | Single major depressive episode, severe, with psychosis, psychosis in remission     |
| E1125                 | All            | Single major depressive episode, in partial or unspecified remission                |
| E1126                 | All            | Single major depressive episode, in full remission                                  |
| E112z                 | All            | Single major depressive episode NOS                                                 |
| XM1GC                 | All            | Endogenous depression - recurrent                                                   |
| E1130                 | All            | Recurrent major depressive episodes, unspecified                                    |
| E1131                 | All            | Recurrent major depressive episodes, mild                                           |
| E1132                 | All            | Recurrent major depressive episodes, moderate                                       |
| E1133                 | All            | Recurrent major depressive episodes, severe, without mention of psychosis           |
| E1134                 | All            | Recurrent major depressive episodes, severe, with psychosis                         |
| E1135                 | All            | Recurrent major depressive episodes, in partial or unspecified remission            |

|       |     |                                                                                     |
|-------|-----|-------------------------------------------------------------------------------------|
| E1136 | All | Recurrent major depressive episodes, in full remission                              |
| E113z | All | Recurrent major depressive episode NOS                                              |
| X00SU | All | Masked depression                                                                   |
| E11y2 | All | Atypical depressive disorder                                                        |
| X00S8 | All | Post-schizophrenic depression                                                       |
| XSEgJ | All | Major depressive disorder                                                           |
| XSKr7 | All | Cotard syndrome                                                                     |
| XSGol | All | Moderate major depression                                                           |
| XSGok | All | Mild major depression                                                               |
| XSGom | All | Severe major depression without psychotic features                                  |
| XSGon | All | Severe major depression with psychotic features                                     |
| E1137 | All | Recurrent depressive disorder                                                       |
| E130. | All | Reactive depressive psychosis                                                       |
| E2B.. | All | Depressive disorder NEC                                                             |
| E2B0. | All | Postviral depression                                                                |
| E2B1. | All | Chronic depression                                                                  |
| Eu320 | All | [X]Mild depressive episode                                                          |
| Eu321 | All | [X]Moderate depressive episode                                                      |
| Eu331 | All | [X]Recurrent depressive disorder, current episode moderate                          |
| XE1Y1 | All | Recurrent major depressive episodes                                                 |
| XE1ZY | All | [X]Severe depressive episode without psychotic symptoms                             |
| XE1ZZ | All | [X]Severe depressive episode with psychotic symptoms                                |
| XE1Za | All | [X]Other depressive episodes                                                        |
| XE1Zb | All | [X]Depressive episode, unspecified                                                  |
| XE1Zd | All | [X]Recurrent depressive disorder, current episode severe without psychotic symptoms |
| XE1Ze | All | [X]Recurrent depressive disorder, current episode severe with psychotic symptoms    |
| XE1Zf | All | [X]Recurrent depressive disorder, unspecified                                       |
| XaB9J | All | Depression NOS                                                                      |
| XaCHr | All | [X] Single episode agitated depression without psychotic symptoms                   |
| XaCHs | All | [X] Single episode major depression without psychotic symptoms                      |
| XaClS | All | Mild depression                                                                     |
| XaClt | All | Moderate depression                                                                 |
| XaClu | All | Severe depression                                                                   |
| E0013 | All | Presenile dementia with depression                                                  |
| E0021 | All | Senile dementia with depression                                                     |

**Supplementary table S2.3.** Read codes used to identify a diagnosis of recurrent major depression.

| <b>Recurrent major depression</b> |                |                                                                                        |
|-----------------------------------|----------------|----------------------------------------------------------------------------------------|
| <b>Read V2 Code</b>               | <b>Term ID</b> | <b>Description</b>                                                                     |
| E113.                             | All            | Recurrent major depressive episode                                                     |
| E1130                             | All            | Recurrent major depressive episodes, unspecified                                       |
| E1131                             | All            | Recurrent major depressive episodes, mild                                              |
| E1132                             | All            | Recurrent major depressive episodes, moderate                                          |
| E1133                             | All            | Recurrent major depressive episodes, severe, without mention of psychosis              |
| E1134                             | All            | Recurrent major depressive episodes, severe, with psychosis                            |
| E1135                             | All            | Recurrent major depressive episodes, in partial or unspecified remission               |
| E1136                             | All            | Recurrent major depressive episodes, in full remission                                 |
| E1137                             | All            | Recurrent depressive disorder                                                          |
| E113z                             | All            | Recurrent major depressive episode NOS                                                 |
| E2B1.                             | All            | Chronic depression                                                                     |
| Eu32A                             | All            | [X]Recurrent major depressive episodes, severe, with psychosis, psychosis in remission |
| Eu33.                             | All            | [X]Recurrent depressive disorder                                                       |
| Eu330                             | All            | [X]Recurrent depressive disorder, current episode mild                                 |
| Eu331                             | All            | [X]Recurrent depressive disorder, current episode moderate                             |
| Eu332                             | All            | [X]Recurrent depressive disorder, current episode severe without psychotic symptoms    |
| Eu333                             | All            | [X]Recurrent depressive disorder, current episode severe with psychotic symptoms       |
| Eu334                             | All            | [X]Recurrent depressive disorder, currently in remission                               |
| Eu33y                             | All            | [X]Other recurrent depressive disorders                                                |
| Eu33z                             | All            | [X]Recurrent depressive disorder, unspecified                                          |
| <b>Read CTV3 Code</b>             | <b>Term ID</b> | <b>Description</b>                                                                     |
| Xa0wV                             | All            | Recurrent brief depressive disorder                                                    |
| XM1GC                             | All            | Endogenous depression - recurrent                                                      |
| E1130                             | All            | Recurrent major depressive episodes, unspecified                                       |
| E1131                             | All            | Recurrent major depressive episodes, mild                                              |
| E1132                             | All            | Recurrent major depressive episodes, moderate                                          |
| E1133                             | All            | Recurrent major depressive episodes, severe, without mention of psychosis              |
| E1134                             | All            | Recurrent major depressive episodes, severe, with psychosis                            |
| XaX54                             | All            | Recurrent major depressive episodes, severe, with psychosis, psychosis in remission    |
| E1135                             | All            | Recurrent major depressive episodes, in partial or unspecified remission               |
| E1136                             | All            | Recurrent major depressive episodes, in full remission                                 |
| E113z                             | All            | Recurrent major depressive episode NOS                                                 |
| E1137                             | All            | Recurrent depressive disorder                                                          |

|       |     |                                                                                     |
|-------|-----|-------------------------------------------------------------------------------------|
| E2B1. | All | Chronic depression                                                                  |
| Eu331 | All | [X]Recurrent depressive disorder, current episode moderate                          |
| XE1Y1 | All | Recurrent major depressive episodes                                                 |
| XE1Zd | All | [X]Recurrent depressive disorder, current episode severe without psychotic symptoms |
| XE1Ze | All | [X]Recurrent depressive disorder, current episode severe with psychotic symptoms    |
| XE1Zf | All | [X]Recurrent depressive disorder, unspecified                                       |

**Supplementary table S2.4.** Read codes used to identify anxiety episodes.

| <b>Anxiety episode</b> |                |                                                 |
|------------------------|----------------|-------------------------------------------------|
| <b>Read V2 Code</b>    | <b>Term ID</b> | <b>Description</b>                              |
| E200.                  | All            | Anxiety states                                  |
| E2000                  | All            | Anxiety state unspecified                       |
| E2001                  | All            | Panic disorder                                  |
| E2002                  | All            | Generalised anxiety disorder                    |
| E2003                  | All            | Anxiety with depression                         |
| E2004                  | All            | Chronic anxiety                                 |
| E2005                  | All            | Recurrent anxiety                               |
| E200z                  | All            | Anxiety state NOS                               |
| Eu41.                  | All            | [X]Other anxiety disorders                      |
| Eu410                  | All            | [X]Panic disorder [episodic paroxysmal anxiety] |
| Eu411                  | All            | [X]Generalized anxiety disorder                 |
| Eu412                  | All            | [X]Mixed anxiety and depressive disorder        |
| Eu413                  | All            | [X]Other mixed anxiety disorders                |
| Eu41y                  | All            | [X]Other specified anxiety disorders            |
| Eu41z                  | All            | [X]Anxiety disorder, unspecified                |
| <b>Read CTV3 Code</b>  | <b>Term ID</b> | <b>Description</b>                              |
| E200.                  | All            | Anxiety disorder                                |
| XE1Y7                  | All            | Panic disorder                                  |
| Eu410                  | All            | [X]Panic disorder [episodic paroxysmal anxiety] |
| E2002                  | All            | Generalised anxiety disorder                    |
| X00Sb                  | All            | Mixed anxiety and depressive disorder           |
| X00RP                  | All            | Organic anxiety disorder                        |
| E2004                  | All            | Chronic anxiety                                 |
| E2005                  | All            | Recurrent anxiety                               |
| E200z                  | All            | Anxiety state NOS                               |
| X00Sc                  | All            | Anxiety hysteria                                |
| Eu41.                  | All            | [X]Other anxiety disorders                      |
| Eu413                  | All            | [X]Other mixed anxiety disorders                |
| Eu41z                  | All            | [X]Anxiety disorder, unspecified                |
| XE1Zj                  | All            | [X]Other specified anxiety disorders            |



**Supplementary table S2.5.** Read codes used to identify adjustment disorder.

| <b>Adjustment disorder</b> |                |                                                                    |
|----------------------------|----------------|--------------------------------------------------------------------|
| <b>Read V2 Code</b>        | <b>Term ID</b> | <b>Description</b>                                                 |
| E29..                      | All            | Adjustment reaction                                                |
| E290.                      | All            | Brief depressive reaction                                          |
| E2900                      | All            | Grief reaction                                                     |
| E290z                      | All            | Brief depressive reaction NOS                                      |
| E291.                      | All            | Prolonged depressive reaction                                      |
| E292.                      | All            | Adjustment reaction with predominant disturbance of other emotions |
| E2924                      | All            | Adjustment reaction with anxious mood                              |
| E292y                      | All            | Adjustment reaction with mixed disturbance of emotion              |
| E292z                      | All            | Adjustment reaction with disturbance of other emotion NOS          |
| E293.                      | All            | Adjustment reaction with predominant disturbance of conduct        |
| E2930                      | All            | Adjustment reaction with aggression                                |
| E2931                      | All            | Adjustment reaction with antisocial behaviour                      |
| E2932                      | All            | Adjustment reaction with destructiveness                           |
| E293z                      | All            | Adjustment reaction with predominant disturbance of conduct NOS    |
| E294.                      | All            | Adjustment reaction with mixed disturbance of emotion and conduct  |
| E29y.                      | All            | Other adjustment reactions                                         |
| E29y2                      | All            | Adjustment reaction with physical symptoms                         |
| E29y3                      | All            | Elective mutism due to an adjustment reaction                      |
| E29y5                      | All            | Other adjustment reaction with withdrawal                          |
| E29yz                      | All            | Other adjustment reactions NOS                                     |
| E29z.                      | All            | Adjustment reaction NOS                                            |
| <b>Read CTV3 Code</b>      | <b>Term ID</b> | <b>Description</b>                                                 |
| E29..                      | All            | Adjustment disorder                                                |
| E290.                      | All            | Brief depressive adjustment reaction                               |
| E290z                      | All            | Brief depressive reaction NOS                                      |
| E291.                      | All            | Prolonged depressive adjustment reaction                           |
| E2924                      | All            | Adjustment reaction with anxious mood                              |
| E292y                      | All            | Adjustment reaction with mixed disturbance of emotion              |
| E293.                      | All            | Adjustment reaction with predominant disturbance of conduct        |
| E2930                      | All            | Adjustment reaction with aggression                                |
| E2931                      | All            | Adjustment reaction with antisocial behaviour                      |
| E2932                      | All            | Adjustment reaction with destructiveness                           |
| E293z                      | All            | Adjustment reaction with predominant disturbance of conduct NOS    |
| E294.                      | All            | Adjustment reaction with mixed disturbance of emotion and conduct  |
| E292.                      | All            | Adjustment reaction with predominant disturbance of other emotions |
| E292z                      | All            | Adjustment reaction with disturbance of other emotion NOS          |
| E29y.                      | All            | Other adjustment reactions                                         |

|       |     |                                               |
|-------|-----|-----------------------------------------------|
| E29yz | All | Other adjustment reactions NOS                |
| E29y2 | All | Adjustment reaction with physical symptoms    |
| E29y3 | All | Elective mutism due to an adjustment reaction |
| E29y5 | All | Other adjustment reaction with withdrawal     |
| E29z. | All | Adjustment reaction NOS                       |

**Supplementary table S2.6.** Read codes used to identify agoraphobia.

| <b>Agoraphobia</b>    |                |                                                           |
|-----------------------|----------------|-----------------------------------------------------------|
| <b>Read V2 Code</b>   | <b>Term ID</b> | <b>Description</b>                                        |
| Eu400                 | All            | [X]Agoraphobia                                            |
| E2021                 | All            | Agoraphobia with panic attacks                            |
| Eu400                 | All            | [X]Panic disorder with agoraphobia                        |
| E2022                 | All            | Agoraphobia without mention of panic attacks              |
| Eu400                 | All            | [X]Agoraphobia without history of panic disorder          |
| E2029                 | All            | Fear of crowds                                            |
| <b>Read CTV3 Code</b> | <b>Term ID</b> | <b>Description</b>                                        |
| X00SV                 | All            | Agoraphobia                                               |
| E2021                 | All            | Agoraphobia with panic attacks                            |
| E2022                 | All            | Agoraphobia without mention of panic attacks              |
| XaK2c                 | All            | H/O: agoraphobia                                          |
| XaY00                 | All            | Mobility inventory for agoraphobia                        |
| XaYS1                 | All            | Mobility inventory for agoraphobia when alone score       |
| XaYS0                 | All            | Mobility inventory for agoraphobia when accompanied score |
| X00SV                 | All            | Phobia of going out                                       |

**Supplementary table S2.7.** Read codes used to identify self-harm.

| <b>Self-harm</b>    |                |                                                                                                                           |
|---------------------|----------------|---------------------------------------------------------------------------------------------------------------------------|
| <b>Read V2 Code</b> | <b>Term ID</b> | <b>Description</b>                                                                                                        |
| U2...               | All            | [X]Intentional self-harm                                                                                                  |
| U2E..               | All            | [X]Self mutilation                                                                                                        |
| U2y..               | All            | [X]Intentional self harm by other specified means                                                                         |
| U2y1.               | All            | [X]Intentional self harm by other specified means, occurrence in residential institution                                  |
| U2y2.               | All            | [X]Intentional self harm by other specified means, occurrence at school, other institution and public administrative area |
| U2y3.               | All            | [X]Intentional self harm by other specified means, occurrence at sports and athletics area                                |
| U2y4.               | All            | [X]Intentional self harm by other specified means, occurrence on street and highway                                       |
| U2y5.               | All            | [X]Intentional self harm by other specified means, occurrence at trade and service area                                   |
| U2y6.               | All            | [X]Intentional self harm by other specified means, occurrence at industrial and construction area                         |
| U2y7.               | All            | [X]Intentional self harm by other specified means, occurrence on farm                                                     |
| U2yy.               | All            | [X]Intentional self harm by other specified means, occurrence at other specified place                                    |
| U2yz.               | All            | [X]Intentional self harm by other specified means, occurrence at unspecified place                                        |
| U2z..               | All            | [X]Intentional self harm by unspecified means                                                                             |
| U2z..               | All            | [X]Intentional self harm by unspecified means                                                                             |
| U2z0.               | All            | [X]Intentional self harm by unspecified means, occurrence at home                                                         |
| U2z1.               | All            | [X]Intentional self harm by unspecified means, occurrence in residential institution                                      |
| U2z2.               | All            | [X]Intentional self harm by unspecified means, occurrence at school, other institution and public administrative area     |
| U2z3.               | All            | [X]Intentional self harm by unspecified means, occurrence at sports and athletics area                                    |
| U2z4.               | All            | [X]Intentional self harm by unspecified means, occurrence on street and highway                                           |
| U2z5.               | All            | [X]Intentional self harm by unspecified means, occurrence at trade and service area                                       |
| U2z6.               | All            | [X]Intentional self harm by unspecified means, occurrence at industrial and construction area                             |
| U2z7.               | All            | [X]Intentional self harm by unspecified means, occurrence on farm                                                         |
| U2zy.               | All            | [X]Intentional self harm by unspecified means, occurrence at other specified place                                        |
| U2zz.               | All            | [X]Intentional self harm by unspecified means, occurrence at unspecified place                                            |
| 146B.               | All            | H/O: deliberate self harm                                                                                                 |
| ZV1B2               | All            | [V]Personal history of self-harm                                                                                          |
| U720.               | All            | [X]Sequelae of intentional self-harm                                                                                      |
| TK601               | All            | Self inflicted lacerations to wrist                                                                                       |
| U26..               | All            | [X]Intentional self harm by explosive material                                                                            |

|       |     |                                                                                                                                        |
|-------|-----|----------------------------------------------------------------------------------------------------------------------------------------|
| U260. | All | [X]Intentional self harm by explosive material, occurrence at home                                                                     |
| U261. | All | [X]Intentional self harm by explosive material, occurrence in residential institution                                                  |
| U262. | All | [X]Intentional self harm by explosive material, occurrence at school, other institution and public administrative area                 |
| U263. | All | [X]Intentional self harm by explosive material, occurrence at sports and athletics area                                                |
| U264. | All | [X]Intentional self harm by explosive material, occurrence on street and highway                                                       |
| U265. | All | [X]Intentional self harm by explosive material, occurrence at trade and service area                                                   |
| U266. | All | [X]Intentional self harm by explosive material, occurrence at industrial and construction area                                         |
| U267. | All | [X]Intentional self harm by explosive material, occurrence on farm                                                                     |
| U26y. | All | [X]Intentional self harm by explosive material, occurrence at other specified place                                                    |
| U26z. | All | [X]Intentional self harm by explosive material, occurrence at unspecified place                                                        |
| U27.. | All | [X]Intentional self harm by smoke, fire and flames                                                                                     |
| U270. | All | [X]Intentional self harm by smoke, fire and flames, occurrence at home                                                                 |
| U271. | All | [X]Intentional self harm by smoke, fire and flames, occurrence in residential institution                                              |
| U272. | All | [X]Intentional self harm by smoke, fire and flames, occurrence at school, other institution and public administrative area             |
| U273. | All | [X]Intentional self harm by smoke, fire and flames, occurrence at sports and athletics area                                            |
| U274. | All | [X]Intentional self harm by smoke, fire and flames, occurrence on street and highway                                                   |
| U275. | All | [X]Intentional self harm by smoke, fire and flames, occurrence at trade and service area                                               |
| U276. | All | [X]Intentional self harm by smoke, fire and flames, occurrence at industrial and construction area                                     |
| U277. | All | [X]Intentional self harm by smoke, fire and flames, occurrence on farm                                                                 |
| U27y. | All | [X]Intentional self harm by smoke, fire and flames, occurrence at other specified place                                                |
| U27z. | All | [X]Intentional self harm by smoke, fire and flames, occurrence at unspecified place                                                    |
| U28.. | All | [X]Intentional self harm by steam, hot vapours and hot objects                                                                         |
| U280. | All | [X]Intentional self harm by steam, hot vapours and hot objects, occurrence at home                                                     |
| U281. | All | [X]Intentional self harm by steam, hot vapours and hot objects, occurrence in residential institution                                  |
| U282. | All | [X]Intentional self harm by steam, hot vapours and hot objects, occurrence at school, other institution and public administrative area |
| U283. | All | [X]Intentional self harm by steam, hot vapours and hot objects, occurrence at sports and athletics area                                |
| U284. | All | [X]Intentional self harm by steam, hot vapours and hot objects, occurrence on street and highway                                       |

|                       |                |                                                                                                                  |
|-----------------------|----------------|------------------------------------------------------------------------------------------------------------------|
| U285.                 | All            | [X]Intentional self harm by steam, hot vapours and hot objects, occurrence at trade and service area             |
| U286.                 | All            | [X]Intentional self harm by steam, hot vapours and hot objects, occurrence at industrial and construction area   |
| U287.                 | All            | [X]Intentional self harm by steam, hot vapours and hot objects, occurrence on farm                               |
| U28y.                 | All            | [X]Intentional self harm by steam, hot vapours and hot objects, occurrence at other specified place              |
| U28z.                 | All            | [X]Intentional self harm by steam, hot vapours and hot objects, occurrence at unspecified place                  |
| U29..                 | All            | [X]Intentional self harm by sharp object                                                                         |
| U290.                 | All            | [X]Intentional self harm by sharp object, occurrence at home                                                     |
| U291.                 | All            | [X]Intentional self harm by sharp object, occurrence in residential institution                                  |
| U292.                 | All            | [X]Intentional self harm by sharp object, occurrence at school, other institution and public administrative area |
| U293.                 | All            | [X]Intentional self harm by sharp object, occurrence at sports and athletics area                                |
| U294.                 | All            | [X]Intentional self harm by sharp object, occurrence on street and highway                                       |
| U295.                 | All            | [X]Intentional self harm by sharp object, occurrence at trade and service area                                   |
| U296.                 | All            | [X]Intentional self harm by sharp object, occurrence at industrial and construction area                         |
| U297.                 | All            | [X]Intentional self harm by sharp object, occurrence on farm                                                     |
| U2A..                 | All            | [X]Intentional self harm by blunt object                                                                         |
| U2A0.                 | All            | [X]Intentional self harm by blunt object, occurrence at home                                                     |
| U2A1.                 | All            | [X]Intentional self harm by blunt object, occurrence in residential institution                                  |
| U2A2.                 | All            | [X]Intentional self harm by blunt object, occurrence at school, other institution and public administrative area |
| U2A3.                 | All            | [X]Intentional self harm by blunt object, occurrence at sports and athletics area                                |
| U2A4.                 | All            | [X]Intentional self harm by blunt object, occurrence on street and highway                                       |
| U2A5.                 | All            | [X]Intentional self harm by blunt object, occurrence at trade and service area                                   |
| U2A6.                 | All            | [X]Intentional self harm by blunt object, occurrence at industrial and construction area                         |
| U2A7.                 | All            | [X]Intentional self harm by blunt object, occurrence on farm                                                     |
| U2Ay.                 | All            | [X]Intentional self harm by blunt object, occurrence at other specified place                                    |
| U2Az.                 | All            | [X]Intentional self harm by blunt object, occurrence at unspecified place                                        |
| <b>Read CTV3 Code</b> | <b>Term ID</b> | <b>Description</b>                                                                                               |
| XE22H                 | All            | Suicide and self harm                                                                                            |
| X71BH                 | All            | Self injury by cigarette burn                                                                                    |
| XE22K                 | All            | Self injury with external chemical burn                                                                          |
| Xa0EN                 | All            | Self inflicted injury                                                                                            |
| ZV1B2                 | All            | [V]Personal history of self-harm                                                                                 |

|       |     |                                                                                                                  |
|-------|-----|------------------------------------------------------------------------------------------------------------------|
| XaF9U | All | H/O: deliberate self harm                                                                                        |
| U2A.. | All | [X]Intentional self harm by blunt object                                                                         |
| U2A0. | All | [X]Intentional self harm by blunt object, occurrence at home                                                     |
| U2A1. | All | [X]Intentional self harm by blunt object, occurrence in residential institution                                  |
| U2A2. | All | [X]Intentional self harm by blunt object, occurrence at school, other institution and public administrative area |
| U2A3. | All | [X]Intentional self harm by blunt object, occurrence at sports and athletics area                                |
| U2A4. | All | [X]Intentional self harm by blunt object, occurrence on street and highway                                       |
| U2A5. | All | [X]Intentional self harm by blunt object, occurrence at trade and service area                                   |
| U2A6. | All | [X]Intentional self harm by blunt object, occurrence at industrial and construction area                         |
| U2A7. | All | [X]Intentional self harm by blunt object, occurrence on farm                                                     |
| U2Ay. | All | [X]Intentional self harm by blunt object, occurrence at other specified place                                    |
| U2Az. | All | [X]Intentional self harm by blunt object, occurrence at unspecified place                                        |
| U29.. | All | [X]Intentional self harm by sharp object                                                                         |
| U290. | All | [X]Intentional self harm by sharp object, occurrence at home                                                     |
| U291. | All | [X]Intentional self harm by sharp object, occurrence in residential institution                                  |
| U292. | All | [X]Intentional self harm by sharp object, occurrence at school, other institution and public administrative area |
| U293. | All | [X]Intentional self harm by sharp object, occurrence at sports and athletics area                                |
| U294. | All | [X]Intentional self harm by sharp object, occurrence on street and highway                                       |
| U295. | All | [X]Intentional self harm by sharp object, occurrence at trade and service area                                   |
| U296. | All | [X]Intentional self harm by sharp object, occurrence at industrial and construction area                         |
| U297. | All | [X]Intentional self harm by sharp object, occurrence on farm                                                     |
| U29y. | All | [X]Intentional self harm by sharp object, occurrence at other specified place                                    |
| U29z. | All | [X]Intentional self harm by sharp object, occurrence at unspecified place                                        |
| XE22i | All | [X]Intentional self harm by self mutilation                                                                      |
| X766K | All | Deliberate self-harm                                                                                             |
| X766U | All | Biting self                                                                                                      |
| X766R | All | Biting own hand                                                                                                  |
| Xa2zx | All | Biting own fingers                                                                                               |
| Xa2zy | All | Biting own toes                                                                                                  |
| Xa2o5 | All | Biting own arm                                                                                                   |
| Xa2p5 | All | Burning self                                                                                                     |
| X766V | All | Cutting self                                                                                                     |
| XaBA0 | All | Cutting own wrists                                                                                               |

|       |     |                                                                    |
|-------|-----|--------------------------------------------------------------------|
| Ua1A4 | All | Cutting own throat                                                 |
| Xa2pE | All | Damaging own wounds                                                |
| Xa2pF | All | Reopening scars                                                    |
| Xa2pH | All | Poking fingers into wound                                          |
| XaAxe | All | Inserting objects into wound                                       |
| Xa2ny | All | Gouging own body parts                                             |
| Xa2nz | All | Gouging own flesh                                                  |
| Xa2o0 | All | Gouging own eyes                                                   |
| Xa2o1 | All | Gouging own rectum                                                 |
| Xa30D | All | Gouging own vagina                                                 |
| E2731 | All | Head-banging                                                       |
| Xa2o2 | All | Banging own head against object                                    |
| Xa2o3 | All | Banging own head against own body parts                            |
| Xa2pI | All | Hitting self                                                       |
| Xa2pJ | All | Punching self                                                      |
| Xa2pK | All | Slapping self                                                      |
| X766S | All | Head-hitting                                                       |
| Xa2p3 | All | Inserting foreign bodies into own orifices                         |
| Ua14Q | All | Self-electrocution                                                 |
| Xa2pQ | All | Nipping self                                                       |
| Xa2pM | All | Picking own skin                                                   |
| Xa2pR | All | Pinching self                                                      |
| Xa2pN | All | Rubbing own skin                                                   |
| X766T | All | Scratches self                                                     |
| Xa303 | All | Self-scalding                                                      |
| Ua14N | All | Self-incineration                                                  |
| X766L | All | Self-mutilation                                                    |
| X766M | All | Self-mutilation of hands                                           |
| Xa2nl | All | Self-mutilation of genitalia                                       |
| X766N | All | Self-mutilation of penis                                           |
| X766O | All | Self-mutilation of eyes                                            |
| Xa2nm | All | Enucleation of own eyes                                            |
| X766P | All | Self-mutilation of ears                                            |
| Xa2no | All | Self-inducing a prolapse                                           |
| Xa2nq | All | Breaking own bones                                                 |
| Xa2nr | All | Pulling own teeth out                                              |
| Xa2nt | All | Eating own flesh                                                   |
| Xa2nv | All | Stripping own skin                                                 |
| U2E.. | All | [X]Self mutilation                                                 |
| X766W | All | Swallowing objects                                                 |
| Xa2p2 | All | Swallowing substances                                              |
| X766Q | All | Self-inflicted skin problems                                       |
| XE22c | All | [X]Intentional self-harm                                           |
| U26.. | All | [X]Intentional self harm by explosive material                     |
| U260. | All | [X]Intentional self harm by explosive material, occurrence at home |



|       |     |                                                                                                                                        |
|-------|-----|----------------------------------------------------------------------------------------------------------------------------------------|
| U261. | All | [X]Intentional self harm by explosive material, occurrence in residential institution                                                  |
| U262. | All | [X]Intentional self harm by explosive material, occurrence at school, other institution and public administrative area                 |
| U263. | All | [X]Intentional self harm by explosive material, occurrence at sports and athletics area                                                |
| U264. | All | [X]Intentional self harm by explosive material, occurrence on street and highway                                                       |
| U265. | All | [X]Intentional self harm by explosive material, occurrence at trade and service area                                                   |
| U266. | All | [X]Intentional self harm by explosive material, occurrence at industrial and construction area                                         |
| U267. | All | [X]Intentional self harm by explosive material, occurrence on farm                                                                     |
| U26y. | All | [X]Intentional self harm by explosive material, occurrence at other specified place                                                    |
| U26z. | All | [X]Intentional self harm by explosive material, occurrence at unspecified place                                                        |
| U27.. | All | [X]Intentional self harm by smoke, fire and flames                                                                                     |
| U270. | All | [X]Intentional self harm by smoke, fire and flames, occurrence at home                                                                 |
| U271. | All | [X]Intentional self harm by smoke, fire and flames, occurrence in residential institution                                              |
| U272. | All | [X]Intentional self harm by smoke, fire and flames, occurrence at school, other institution and public administrative area             |
| U273. | All | [X]Intentional self harm by smoke, fire and flames, occurrence at sports and athletics area                                            |
| U274. | All | [X]Intentional self harm by smoke, fire and flames, occurrence on street and highway                                                   |
| U275. | All | [X]Intentional self harm by smoke, fire and flames, occurrence at trade and service area                                               |
| U276. | All | [X]Intentional self harm by smoke, fire and flames, occurrence at industrial and construction area                                     |
| U277. | All | [X]Intentional self harm by smoke, fire and flames, occurrence on farm                                                                 |
| U27y. | All | [X]Intentional self harm by smoke, fire and flames, occurrence at other specified place                                                |
| U27z. | All | [X]Intentional self harm by smoke, fire and flames, occurrence at unspecified place                                                    |
| U28.. | All | [X]Intentional self harm by steam, hot vapours and hot objects                                                                         |
| U280. | All | [X]Intentional self harm by steam, hot vapours and hot objects, occurrence at home                                                     |
| U281. | All | [X]Intentional self harm by steam, hot vapours and hot objects, occurrence in residential institution                                  |
| U282. | All | [X]Intentional self harm by steam, hot vapours and hot objects, occurrence at school, other institution and public administrative area |
| U283. | All | [X]Intentional self harm by steam, hot vapours and hot objects, occurrence at sports and athletics area                                |
| U284. | All | [X]Intentional self harm by steam, hot vapours and hot objects, occurrence on street and highway                                       |
| U285. | All | [X]Intentional self harm by steam, hot vapours and hot objects, occurrence at trade and service area                                   |

|       |     |                                                                                                                  |
|-------|-----|------------------------------------------------------------------------------------------------------------------|
| U286. | All | [X]Intentional self harm by steam, hot vapours and hot objects, occurrence at industrial and construction area   |
| U287. | All | [X]Intentional self harm by steam, hot vapours and hot objects, occurrence on farm                               |
| U28y. | All | [X]Intentional self harm by steam, hot vapours and hot objects, occurrence at other specified place              |
| U28z. | All | [X]Intentional self harm by steam, hot vapours and hot objects, occurrence at unspecified place                  |
| U29.. | All | [X]Intentional self harm by sharp object                                                                         |
| U290. | All | [X]Intentional self harm by sharp object, occurrence at home                                                     |
| U291. | All | [X]Intentional self harm by sharp object, occurrence in residential institution                                  |
| U292. | All | [X]Intentional self harm by sharp object, occurrence at school, other institution and public administrative area |
| U293. | All | [X]Intentional self harm by sharp object, occurrence at sports and athletics area                                |
| U294. | All | [X]Intentional self harm by sharp object, occurrence on street and highway                                       |
| U295. | All | [X]Intentional self harm by sharp object, occurrence at trade and service area                                   |
| U296. | All | [X]Intentional self harm by sharp object, occurrence at industrial and construction area                         |
| U297. | All | [X]Intentional self harm by sharp object, occurrence on farm                                                     |
| U2A.. | All | [X]Intentional self harm by blunt object                                                                         |
| U2A0. | All | [X]Intentional self harm by blunt object, occurrence at home                                                     |
| U2A1. | All | [X]Intentional self harm by blunt object, occurrence in residential institution                                  |
| U2A2. | All | [X]Intentional self harm by blunt object, occurrence at school, other institution and public administrative area |
| U2A3. | All | [X]Intentional self harm by blunt object, occurrence at sports and athletics area                                |
| U2A4. | All | [X]Intentional self harm by blunt object, occurrence on street and highway                                       |
| U2A5. | All | [X]Intentional self harm by blunt object, occurrence at trade and service area                                   |
| U2A6. | All | [X]Intentional self harm by blunt object, occurrence at industrial and construction area                         |
| U2A7. | All | [X]Intentional self harm by blunt object, occurrence on farm                                                     |
| U2Ay. | All | [X]Intentional self harm by blunt object, occurrence at other specified place                                    |
| U2Az. | All | [X]Intentional self harm by blunt object, occurrence at unspecified place                                        |

**Supplementary table S2.8.** Read codes used to identify parasuicide.

| <b>Parasuicide</b>  |                |                                                                                  |
|---------------------|----------------|----------------------------------------------------------------------------------|
| <b>Read V2 Code</b> | <b>Term ID</b> | <b>Description</b>                                                               |
| U21..               | All            | [X]Intent self harm by hanging, strangulation/suffocation                        |
| U210.               | All            | [X]Int self harm by hanging, strangulation/suffocation occ home                  |
| U211.               | All            | [X]Intent self harm by hanging, strangulation/suffocation at res institut        |
| U212.               | All            | [X]Int self harm by hanging, strangulation/suffocation in school/pub admin area  |
| U213.               | All            | [X]Intent self harm by hanging, strangulation/suffocation in sport/athletic area |
| U214.               | All            | [X]Int self harm by hanging, strangulation/suffocation in street/highway         |
| U215.               | All            | [X]Intent self harm by hanging, strangulation/suffocation trade/service area     |
| U216.               | All            | [X]Int self harm by hanging, strangulation/suffocation indust/construct area     |
| U217.               | All            | [X]Int self harm by hanging, strangulation/suffocation occ farm                  |
| U21y.               | All            | [X]Int self harm by hanging, strangulation/suffocation other spec place          |
| U21z.               | All            | [X]Intent self harm by hanging, strangulation/suffocation unspecif place         |
| U22..               | All            | [X]Intent self harm by drowning and submersion                                   |
| U220.               | All            | [X]Int self harm by drowning and submersion occ home                             |
| U221.               | All            | [X]Intent self harm by drowning and submersion at res institut                   |
| U222.               | All            | [X]Int self harm by drowning and submersion in school/pub admin area             |
| U223.               | All            | [X]Intent self harm by drowning and submersion in sport/athletic area            |
| U224.               | All            | [X]Int self harm by drowning and submersion in street/highway                    |
| U225.               | All            | [X]Intent self harm by drowning and submersion trade/service area                |
| U226.               | All            | [X]Int self harm by drowning and submersion indust/construct area                |
| U227.               | All            | [X]Int self harm by drowning and submersion occ farm                             |
| U22y.               | All            | [X]Int self harm by drowning and submersion other spec place                     |
| U22z.               | All            | [X]Intent self harm by drowning and submersion unspecif place                    |
| U23..               | All            | [X]Intent self harm by handgun discharge                                         |
| U230.               | All            | [X]Int self harm by handgun discharge occ home                                   |
| U231.               | All            | [X]Intent self harm by handgun discharge at res institut                         |
| U232.               | All            | [X]Int self harm by handgun discharge in school/pub admin area                   |
| U233.               | All            | [X]Intent self harm by handgun discharge in sport/athletic area                  |
| U234.               | All            | [X]Int self harm by handgun discharge in street/highway                          |
| U235.               | All            | [X]Intent self harm by handgun discharge trade/service area                      |
| U236.               | All            | [X]Int self harm by handgun discharge indust/construct area                      |
| U237.               | All            | [X]Int self harm by handgun discharge occ farm                                   |
| U23y.               | All            | [X]Int self harm by handgun discharge other spec place                           |
| U23z.               | All            | [X]Intent self harm by handgun discharge unspecif place                          |

|       |     |                                                                                                                                                 |
|-------|-----|-------------------------------------------------------------------------------------------------------------------------------------------------|
| U24.. | All | [X]Intentional self harm by rifle, shotgun and larger firearm discharge                                                                         |
| U240. | All | [X]Intentional self harm by rifle, shotgun and larger firearm discharge, occurrence at home                                                     |
| U241. | All | [X]Intentional self harm by rifle, shotgun and larger firearm discharge, occurrence in residential institution                                  |
| U242. | All | [X]Intentional self harm by rifle, shotgun and larger firearm discharge, occurrence at school, other institution and public administrative area |
| U243. | All | [X]Intentional self harm by rifle, shotgun and larger firearm discharge, occurrence at sports and athletics area                                |
| U244. | All | [X]Intentional self harm by rifle, shotgun and larger firearm discharge, occurrence on street and highway                                       |
| U245. | All | [X]Intentional self harm by rifle, shotgun and larger firearm discharge, occurrence at trade and service area                                   |
| U246. | All | [X]Intentional self harm by rifle, shotgun and larger firearm discharge, occurrence at industrial and construction area                         |
| U247. | All | [X]Intentional self harm by rifle, shotgun and larger firearm discharge, occurrence on farm                                                     |
| U24y. | All | [X]Intentional self harm by rifle, shotgun and larger firearm discharge, occurrence at other specified place                                    |
| U24z. | All | [X]Intentional self harm by rifle, shotgun and larger firearm discharge, occurrence at unspecified place                                        |
| U25.. | All | [X]Intentional self harm by other and unspecified firearm discharge                                                                             |
| U250. | All | [X]Intentional self harm by other and unspecified firearm discharge, occurrence at home                                                         |
| U251. | All | [X]Intentional self harm by other and unspecified firearm discharge, occurrence in residential institution                                      |
| U252. | All | [X]Intentional self harm by other and unspecified firearm discharge, occurrence at school, other institution and public administrative area     |
| U253. | All | [X]Intentional self harm by other and unspecified firearm discharge, occurrence at sports and athletics area                                    |
| U254. | All | [X]Intentional self harm by other and unspecified firearm discharge, occurrence on street and highway                                           |
| U255. | All | [X]Intentional self harm by other and unspecified firearm discharge, occurrence at trade and service area                                       |
| U256. | All | [X]Intentional self harm by other and unspecified firearm discharge, occurrence at industrial and construction area                             |
| U257. | All | [X]Intentional self harm by other and unspecified firearm discharge, occurrence on farm                                                         |
| U25y. | All | [X]Intentional self harm by other and unspecified firearm discharge, occurrence at other specified place                                        |
| U25z. | All | [X]Intentional self harm by other and unspecified firearm discharge, occurrence at unspecified place                                            |
| 2...  | All | [X]Suicide                                                                                                                                      |
| TK... | All | Attempted suicide                                                                                                                               |
| TK0.. | All | Suicide and selfinflicted poisoning by solid and liquid substances                                                                              |
| TK00. | All | Suicide and selfinflicted poisoning by analgesics, antipyretics and anti-rheumatics                                                             |
| TK01. | All | Suicide + selfinflicted poisoning by barbiturates                                                                                               |
| TK010 | All | Suicide and self inflicted injury by Amylobarbitone                                                                                             |

|       |     |                                                                                                                                                       |
|-------|-----|-------------------------------------------------------------------------------------------------------------------------------------------------------|
| TK011 | All | Suicide and self inflicted injury by Barbitone                                                                                                        |
| TK012 | All | Suicide and self inflicted injury by Butabarbitalone                                                                                                  |
| TK013 | All | Suicide and self inflicted injury by Pentabarbitalone                                                                                                 |
| TK014 | All | Suicide and self inflicted injury by Phenobarbitalone                                                                                                 |
| TK015 | All | Suicide and self inflicted injury by Quinalbarbitalone                                                                                                |
| TK01z | All | Suicide and self inflicted injury by barbiturates                                                                                                     |
| TK02. | All | Suicide and selfinflicted poisoning by other sedatives and hypnotics                                                                                  |
| TK03. | All | Suicide and selfinflicted poisoning by tranquilisers and other psychotropic agents                                                                    |
| TK04. | All | Suicide and selfinflicted poisoning by other drugs and medicines                                                                                      |
| TK05. | All | Suicide + selfinflicted poisoning by drug or medicine NOS                                                                                             |
| TK06. | All | Suicide and selfinflicted poisoning by agricultural and horticultural chemical and pharmaceutical preparations other than plant foods and fertilizers |
| TK07. | All | Suicide and selfinflicted poisoning by corrosive and caustic substances                                                                               |
| TK08. | All | Suicide and selfinflicted poisoning by arsenic and its compounds                                                                                      |
| TK0z. | All | Suicide and selfinflicted poisoning by solid and liquid substances NOS                                                                                |
| TK1.. | All | Suicide + selfinflicted poisoning by gases in domestic use                                                                                            |
| TK10. | All | Suicide and selfinflicted poisoning by gas distributed by pipeline                                                                                    |
| TK11. | All | Suicide and selfinflicted poisoning by liquefied petroleum gas distributed in mobile containers                                                       |
| TK1y. | All | Suicide and selfinflicted poisoning by other utility gas                                                                                              |
| TK1z. | All | Suicide and selfinflicted poisoning by gases in domestic use NOS                                                                                      |
| TK2.. | All | Suicide and selfinflicted poisoning by other gases and vapours                                                                                        |
| TK20. | All | Suicide and selfinflicted poisoning by motor vehicle exhaust gas                                                                                      |
| TK21. | All | Suicide and selfinflicted poisoning by other carbon monoxide                                                                                          |
| TK2y. | All | Suicide and selfinflicted poisoning by other gases and vapours                                                                                        |
| TK2z. | All | Suicide + selfinflicted poisoning by gases and vapours NOS                                                                                            |
| TK3.. | All | Suicide and selfinflicted injury by hanging, strangulation and suffocation                                                                            |
| TK31. | All | Suicide and selfinflicted injury by suffocation by plastic bag                                                                                        |
| TK3y. | All | Suicide and selfinflicted injury by other means of hanging, strangulation and suffocation                                                             |
| TK3z. | All | Suicide and selfinflicted injury by hanging, strangulation and suffocation NOS                                                                        |
| TK4.. | All | Suicide and selfinflicted injury by drowning                                                                                                          |
| TK5.. | All | Suicide and selfinflicted injury by firearms and explosives                                                                                           |
| TK50. | All | Suicide and selfinflicted injury by handgun                                                                                                           |
| TK51. | All | Suicide and selfinflicted injury by shotgun                                                                                                           |
| TK52. | All | Suicide and selfinflicted injury by hunting rifle                                                                                                     |
| TK53. | All | Suicide and selfinflicted injury by military firearms                                                                                                 |
| TK54. | All | Suicide and selfinflicted injury by other firearm                                                                                                     |
| TK55. | All | Suicide and selfinflicted injury by explosives                                                                                                        |
| TK5z. | All | Suicide and selfinflicted injury by firearms and explosives NOS                                                                                       |
| TK6.. | All | Suicide and selfinflicted injury by cutting and stabbing instruments                                                                                  |

|                       |                |                                                                                           |
|-----------------------|----------------|-------------------------------------------------------------------------------------------|
| TK60.                 | All            | Suicide and selfinflicted injury by cutting                                               |
| TK61.                 | All            | Suicide and selfinflicted injury by stabbing                                              |
| TK6z.                 | All            | Suicide and selfinflicted injury by cutting and stabbing instruments NOS                  |
| TK7..                 | All            | Suicide and selfinflicted injury by jumping from high place                               |
| TK70.                 | All            | Suicide and selfinflicted injury by jumping from residential premises                     |
| TK71.                 | All            | Suicide and selfinflicted injury by jumping from other manmade structure                  |
| TK72.                 | All            | Suicide and selfinflicted injury by jumping from natural sites                            |
| TK72.                 | All            | Suicide and selfinflicted injury by jumping from natural sites                            |
| TK7z.                 | All            | Suicide and selfinflicted injury by jumping from high place NOS                           |
| TKx..                 | All            | Suicide and selfinflicted injury by other means                                           |
| TKx0.                 | All            | Suicide and selfinflicted injury by jumping or lying before moving object                 |
| TKx01                 | All            | Suicide and selfinflicted injury by lying before moving object                            |
| TKx0z                 | All            | Suicide and selfinflicted injury by jumping or lying before moving object NOS             |
| TKx1.                 | All            | Suicide and selfinflicted injury by burns or fire                                         |
| TKx2.                 | All            | Suicide and selfinflicted injury by scald                                                 |
| TKx3.                 | All            | Suicide and selfinflicted injury by extremes of cold                                      |
| TKx4.                 | All            | Suicide and selfinflicted injury by electrocution                                         |
| TKx5.                 | All            | Suicide and selfinflicted injury by crashing of motor vehicle                             |
| TKx6.                 | All            | Suicide and selfinflicted injury by crashing of aircraft                                  |
| TKx7.                 | All            | Suicide and selfinflicted injury by caustic substances, except poisoning                  |
| TKxy.                 | All            | Suicide and selfinflicted injury by other specified means                                 |
| TKxz.                 | All            | Suicide and selfinflicted injury by other means NOS                                       |
| TKz..                 | All            | Suicide and selfinflicted injury NOS                                                      |
| <b>Read CTV3 Code</b> | <b>Term ID</b> | <b>Description</b>                                                                        |
| Xa04L                 | All            | Parasuicide                                                                               |
| Xa3jI                 | All            | Attempted suicide NOS                                                                     |
| 146A.                 | All            | H/O: attempted suicide                                                                    |
| XM1Fs                 | All            | Self hanging, strangulation or suffocation                                                |
| TK3..                 | All            | Suicide and selfinflicted injury by hanging, strangulation and suffocation                |
| TK30.                 | All            | Suicide or attempted suicide by hanging                                                   |
| Xa3jC                 | All            | Attempted suicide - hanging                                                               |
| Xa3jL                 | All            | Suicide - hanging                                                                         |
| TK3y.                 | All            | Suicide and selfinflicted injury by other means of hanging, strangulation and suffocation |
| TK3z.                 | All            | Suicide and selfinflicted injury by hanging, strangulation and suffocation NOS            |
| XE22I                 | All            | Suicide and selfinflicted injury by suffocation by plastic bag                            |
| Xa3jD                 | All            | Attempted suicide - suffocation                                                           |
| Xa3jM                 | All            | Suicide - suffocation                                                                     |
| TK0..                 | All            | Suicide and selfinflicted poisoning by solid and liquid substances                        |

|       |     |                                                                               |
|-------|-----|-------------------------------------------------------------------------------|
| TK0z. | All | Suicide and selfinflicted poisoning by solid and liquid substances NOS        |
| TK4.. | All | Suicide and selfinflicted injury by drowning                                  |
| TK5.. | All | Suicide or selfinflicted injury by firearms and explosives                    |
| TK50. | All | Suicide or selfinflicted injury by handgun                                    |
| TK51. | All | Suicide or selfinflicted injury by shotgun                                    |
| TK52. | All | Suicide or selfinflicted injury by hunting rifle                              |
| TK53. | All | Suicide or selfinflicted injury by military firearm                           |
| TK54. | All | Suicide and selfinflicted injury by other firearm                             |
| TK55. | All | Suicide or selfinflicted injury by explosives                                 |
| TK5z. | All | Suicide and selfinflicted injury by firearms and explosives NOS               |
| Xa3jF | All | Attempted suicide - firearms                                                  |
| Xa3jO | All | Suicide - firearms                                                            |
| TK6.. | All | Suicide or selfinflicted injury by cutting and stabbing                       |
| TK60. | All | Suicide or selfinflicted injury by cutting                                    |
| TK61. | All | Suicide or selfinflicted injury by stabbing                                   |
| TK6z. | All | Suicide and selfinflicted injury by cutting and stabbing instruments NOS      |
| Xa3jG | All | Attempted suicide - cut/stab                                                  |
| Xa3jP | All | Suicide - cut/stab                                                            |
| TK7.. | All | Suicide or self injury by jumping from a height                               |
| TK70. | All | Suicide and selfinflicted injury by jumping from residential premises         |
| TK71. | All | Suicide and selfinflicted injury by jumping from other man-made structure     |
| TK72. | All | Suicide and selfinflicted injury by jumping from natural sites                |
| TK7z. | All | Suicide and selfinflicted injury by jumping from high place NOS               |
| X71B6 | All | Suicide or self injury by jumping from high man-made structure                |
| X71B7 | All | Suicide or self injury by jumping from high building                          |
| X71B8 | All | Suicide or self injury by jumping from bridge                                 |
| X71B9 | All | Suicide or self injury by jumping from high natural feature                   |
| X71BA | All | Suicide or self injury by jumping off cliff                                   |
| Xa3jH | All | Attempted suicide - jumping from a high place                                 |
| Xa3jQ | All | Suicide - jumping from a high place                                           |
| TKx.. | All | Suicide and selfinflicted injury by other means                               |
| TKx0. | All | Suicide and selfinflicted injury by jumping or lying before moving object     |
| TKx00 | All | Suicide and selfinflicted injury by jumping before moving object              |
| TKx01 | All | Suicide and selfinflicted injury by lying before moving object                |
| TKx0z | All | Suicide and selfinflicted injury by jumping or lying before moving object NOS |
| TKxy. | All | Suicide and selfinflicted injury by other specified means                     |
| TKxz. | All | Suicide and selfinflicted injury by other means NOS                           |
| TKx1. | All | Suicide or self injury by burning or fire                                     |
| TKx2. | All | Suicide or self injury by scalding                                            |
| X71BF | All | Suicide or self injury by igniting petrol soaked clothing                     |



|       |     |                                                                                           |
|-------|-----|-------------------------------------------------------------------------------------------|
| X71BG | All | Suicide or self injury by arson                                                           |
| TKx3. | All | Suicide or self injury by exposure to cold                                                |
| TKx4. | All | Suicide or self injury by electric current                                                |
| TKx7. | All | Suicide and selfinflicted injury by caustic substances, excluding poisoning               |
| TKz.. | All | Suicide and selfinflicted injury NOS                                                      |
| Xa3jI | All | Attempted suicide NOS                                                                     |
| Xa3jR | All | Suicide NOS                                                                               |
| X71B3 | All | Self poisoning by gas                                                                     |
| TK1.. | All | Suicide and selfinflicted poisoning by gases in domestic use                              |
| TK21. | All | Suicide and selfinflicted poisoning by other carbon monoxide                              |
| TK2y. | All | Suicide and selfinflicted poisoning by other gases and vapours                            |
| TK2z. | All | Suicide and selfinflicted poisoning by gases and vapours NOS                              |
| X71B4 | All | Self poisoning by carbon monoxide                                                         |
| TK20. | All | Self poisoning by motor vehicle exhaust gas                                               |
| X71B5 | All | Self poisoning by coal gas                                                                |
| X71BB | All | Suicide or self injury associated with moving vehicles                                    |
| TKx5. | All | Suicide or selfinflicted injury by crashing motor vehicle                                 |
| TKx6. | All | Suicide or selfinflicted injury by crashing of aircraft                                   |
| X71BC | All | Suicide or self injury by placing self in path of moving vehicle                          |
| X71BD | All | Suicide or self injury by placing self in path of moving motor vehicle                    |
| X71BE | All | Suicide or self injury by placing self in path of moving railway vehicle                  |
| XE22J | All | Suicide or attempted suicide by drowning                                                  |
| Xa3jE | All | Attempted suicide - drowning                                                              |
| Xa3jN | All | Suicide - drowning                                                                        |
| XM1Fs | All | Self hanging, strangulation or suffocation                                                |
| TK3.. | All | Suicide and selfinflicted injury by hanging, strangulation and suffocation                |
| TK30. | All | Suicide or attempted suicide by hanging                                                   |
| Xa3jL | All | Suicide - hanging                                                                         |
| TK3y. | All | Suicide and selfinflicted injury by other means of hanging, strangulation and suffocation |
| TK3z. | All | Suicide and selfinflicted injury by hanging, strangulation and suffocation NOS            |
| XE22I | All | Suicide and selfinflicted injury by suffocation by plastic bag                            |
| Xa3jD | All | Attempted suicide - suffocation                                                           |
| Xa3jM | All | Suicide - suffocation                                                                     |
| TK50. | All | Suicide or selfinflicted injury by handgun                                                |
| Ua1AA | All | Hanging self                                                                              |
| Ua1AB | All | Drowning self                                                                             |
| Ua1A9 | All | Jumping from height                                                                       |
| Ua1A8 | All | Jumping from building                                                                     |
| Ua1A7 | All | Jumping from bridge                                                                       |
| Ua14U | All | Jumping from cliff                                                                        |
| Ua1AE | All | Self-asphyxiation                                                                         |



|       |     |                                                                                                                                                       |
|-------|-----|-------------------------------------------------------------------------------------------------------------------------------------------------------|
| Ua1AD | All | Self-strangulation                                                                                                                                    |
| Ua1AC | All | Self-suffocation                                                                                                                                      |
| Ua14S | All | Throwing self in front of vehicle                                                                                                                     |
| Ua14T | All | Throwing self in front of train                                                                                                                       |
| X71B0 | All | Self poisoning by non-drug solid or liquid agents                                                                                                     |
| TK07. | All | Self poisoning by corrosive or caustic substance                                                                                                      |
| TK08. | All | Self poisoning by arsenic or its compounds                                                                                                            |
| X71B2 | All | Self poisoning by plants or parts of plants                                                                                                           |
| XM1FX | All | Self poisoning by agricultural chemical                                                                                                               |
| TK06. | All | Suicide and selfinflicted poisoning by agricultural and horticultural chemical and pharmaceutical preparations other than plant foods and fertilizers |
| X71B1 | All | Self poisoning by paraquat                                                                                                                            |
| Ua14R | All | Shooting self                                                                                                                                         |
| Xa2pL | All | Stabbing self                                                                                                                                         |
| U21.. | All | [X]Intent self harm by hanging, strangulation/suffocation                                                                                             |
| U210. | All | [X]Int self harm by hanging, strangulation/suffocation occ home                                                                                       |
| U211. | All | [X]Intent self harm by hanging, strangulation/suffocation at res institut                                                                             |
| U212. | All | [X]Int self harm by hanging, strangulation/suffocation in school/pub admin area                                                                       |
| U213. | All | [X]Intent self harm by hanging, strangulation/suffocation in sport/athletic area                                                                      |
| U214. | All | [X]Int self harm by hanging, strangulation/suffocation in street/highway                                                                              |
| U215. | All | [X]Intent self harm by hanging, strangulation/suffocation trade/service area                                                                          |
| U216. | All | [X]Int self harm by hanging, strangulation/suffocation indust/construct area                                                                          |
| U217. | All | [X]Int self harm by hanging, strangulation/suffocation occ farm                                                                                       |
| U21y. | All | [X]Int self harm by hanging, strangulation/suffocation other spec place                                                                               |
| U21z. | All | [X]Intent self harm by hanging, strangulation/suffocation unspecif place                                                                              |
| U22.. | All | [X]Intent self harm by drowning and submersion                                                                                                        |
| U220. | All | [X]Int self harm by drowning and submersion occ home                                                                                                  |
| U221. | All | [X]Intent self harm by drowning and submersion at res institut                                                                                        |
| U222. | All | [X]Int self harm by drowning and submersion in school/pub admin area                                                                                  |
| U223. | All | [X]Intent self harm by drowning and submersion in sport/athletic area                                                                                 |
| U224. | All | [X]Int self harm by drowning and submersion in street/highway                                                                                         |
| U225. | All | [X]Intent self harm by drowning and submersion trade/service area                                                                                     |
| U226. | All | [X]Int self harm by drowning and submersion indust/construct area                                                                                     |
| U227. | All | [X]Int self harm by drowning and submersion occ farm                                                                                                  |
| U22y. | All | [X]Int self harm by drowning and submersion other spec place                                                                                          |
| U22z. | All | [X]Intent self harm by drowning and submersion unspecif place                                                                                         |
| U23.. | All | [X]Intent self harm by handgun discharge                                                                                                              |

|       |     |                                                                                                                                                 |
|-------|-----|-------------------------------------------------------------------------------------------------------------------------------------------------|
| U230. | All | [X]Int self harm by handgun discharge occ home                                                                                                  |
| U231. | All | [X]Intent self harm by handgun discharge at res institut                                                                                        |
| U232. | All | [X]Int self harm by handgun discharge in school/pub admin area                                                                                  |
| U233. | All | [X]Intent self harm by handgun discharge in sport/athletic area                                                                                 |
| U234. | All | [X]Int self harm by handgun discharge in street/highway                                                                                         |
| U235. | All | [X]Intent self harm by handgun discharge trade/service area                                                                                     |
| U236. | All | [X]Int self harm by handgun discharge indust/construct area                                                                                     |
| U237. | All | [X]Int self harm by handgun discharge occ farm                                                                                                  |
| U23y. | All | [X]Int self harm by handgun discharge other spec place                                                                                          |
| U23z. | All | [X]Intent self harm by handgun discharge unspecif place                                                                                         |
| U24.. | All | [X]Intentional self harm by rifle, shotgun and larger firearm discharge                                                                         |
| U240. | All | [X]Intentional self harm by rifle, shotgun and larger firearm discharge, occurrence at home                                                     |
| U241. | All | [X]Intentional self harm by rifle, shotgun and larger firearm discharge, occurrence in residential institution                                  |
| U242. | All | [X]Intentional self harm by rifle, shotgun and larger firearm discharge, occurrence at school, other institution and public administrative area |
| U243. | All | [X]Intentional self harm by rifle, shotgun and larger firearm discharge, occurrence at sports and athletics area                                |
| U244. | All | [X]Intentional self harm by rifle, shotgun and larger firearm discharge, occurrence on street and highway                                       |
| U245. | All | [X]Intentional self harm by rifle, shotgun and larger firearm discharge, occurrence at trade and service area                                   |
| U246. | All | [X]Intentional self harm by rifle, shotgun and larger firearm discharge, occurrence at industrial and construction area                         |
| U247. | All | [X]Intentional self harm by rifle, shotgun and larger firearm discharge, occurrence on farm                                                     |
| U24y. | All | [X]Intentional self harm by rifle, shotgun and larger firearm discharge, occurrence at other specified place                                    |
| U24z. | All | [X]Intentional self harm by rifle, shotgun and larger firearm discharge, occurrence at unspecified place                                        |
| U25.. | All | [X]Intentional self harm by other and unspecified firearm discharge                                                                             |
| U250. | All | [X]Intentional self harm by other and unspecified firearm discharge, occurrence at home                                                         |
| U251. | All | [X]Intentional self harm by other and unspecified firearm discharge, occurrence in residential institution                                      |
| U252. | All | [X]Intentional self harm by other and unspecified firearm discharge, occurrence at school, other institution and public administrative area     |
| U253. | All | [X]Intentional self harm by other and unspecified firearm discharge, occurrence at sports and athletics area                                    |
| U254. | All | [X]Intentional self harm by other and unspecified firearm discharge, occurrence on street and highway                                           |
| U255. | All | [X]Intentional self harm by other and unspecified firearm discharge, occurrence at trade and service area                                       |
| U256. | All | [X]Intentional self harm by other and unspecified firearm discharge, occurrence at industrial and construction area                             |
| U257. | All | [X]Intentional self harm by other and unspecified firearm discharge, occurrence on farm                                                         |

|       |     |                                                                                                                                           |
|-------|-----|-------------------------------------------------------------------------------------------------------------------------------------------|
| U25y. | All | <input checked="" type="checkbox"/> Intentional self harm by other and unspecified firearm discharge, occurrence at other specified place |
| U25z. | All | <input checked="" type="checkbox"/> Intentional self harm by other and unspecified firearm discharge, occurrence at unspecified place     |

**Supplementary table S2.9.** Read codes used to identify overdose.

| <b>Medication overdose</b> |                |                                                                 |
|----------------------------|----------------|-----------------------------------------------------------------|
| <b>Read V2 Code</b>        | <b>Term ID</b> | <b>Description</b>                                              |
| U20..                      | All            | [X]Intentional self poisoning /exposure to noxious substance    |
| U200.                      | All            | [X]Intent self poison/exposure to nonopioid analgesic           |
| U2000                      | All            | [X]Int self poison/exposure to nonopioid analgesic at home      |
| U2001                      | All            | [X]Intent self poison nonopioid analgesic at res institut       |
| U2002                      | All            | [X]Int self poison nonopioid analgesic in school/pub admin area |
| U2003                      | All            | [X]Intent self pois nonopioid analgesic in sport/athletic area  |
| U2004                      | All            | [X]Int self pois to nonopioid analgesic in street/highway       |
| U2005                      | All            | [X]Intent self pois to nonopioid analgesic trade/service area   |
| U2006                      | All            | [X]Int self pois to nonopioid analgesic indust/construct area   |
| U2007                      | All            | [X]Int self poison/exposure to nonopioid analgesic on farm      |
| U200y                      | All            | [X]Int self poison nonopioid analgesic other spec place         |
| U200z                      | All            | [X]Intent self poison to nonopioid analgesic unspecif place     |
| U201.                      | All            | [X]Intent self poison/exposure to antiepileptic                 |
| U2010                      | All            | [X]Int self poison/exposure to antiepileptic at home            |
| U2011                      | All            | [X]Intent self poison antiepileptic at res institut             |
| U2012                      | All            | [X]Int self poison antiepileptic in school/pub admin area       |
| U2013                      | All            | [X]Intent self pois antiepileptic in sport/athletic area        |
| U2014                      | All            | [X]Int self pois antiepileptic in street/highway                |
| U2015                      | All            | [X]Intent self pois antiepileptic trade/service area            |
| U2016                      | All            | [X]Int self poison antiepileptic indust/construct area          |
| U2017                      | All            | [X]Int self poison/exposure to antiepileptic on farm            |
| U201y                      | All            | [X]Int self poison antiepileptic other spec place               |
| U201z                      | All            | [X]Intent self poison antiepileptic unspecif place              |
| U202.                      | All            | [X]Intent self poison/exposure to sedative hypnotic             |
| U2020                      | All            | [X]Int self poison/exposure to sedative hypnotic at home        |
| U2021                      | All            | [X]Intent self poison sedative hypnotic at res institut         |
| U2022                      | All            | [X]Int self poison sedative hypnotic in school/pub admin area   |
| U2023                      | All            | [X]Intent self pois sedative hypnotic in sport/athletic area    |
| U2024                      | All            | [X]Int self pois sedative hypnotic in street/highway            |
| U2025                      | All            | [X]Intent self pois sedative hypnotic trade/service area        |
| U2026                      | All            | [X]Int self poison sedative hypnotic indust/construct area      |
| U2027                      | All            | [X]Int self poison/exposure to sedative hypnotic on farm        |
| U202y                      | All            | [X]Int self poison sedative hypnotic other spec place           |
| U202z                      | All            | [X]Intent self poison sedative hypnotic unspecif place          |
| U203.                      | All            | [X]Intent self poison/exposure to antiparkinson drug            |
| U2030                      | All            | [X]Int self poison/exposure to antiparkinson drug at home       |
| U2031                      | All            | [X]Intent self poison antiparkinson drug at res institut        |
| U2032                      | All            | [X]Int self poison antiparkinson drug in school/pub admin area  |
| U2033                      | All            | [X]Intent self pois antiparkinson drug in sport/athletic area   |
| U2034                      | All            | [X]Int self pois antiparkinson drug in street/highway           |

|       |     |                                                               |
|-------|-----|---------------------------------------------------------------|
| U2035 | All | [X]Intent self pois antiparkinson drug trade/service area     |
| U2036 | All | [X]Int self poison antiparkinson drug indust/construct area   |
| U2037 | All | [X]Int self poison/exposure to antiparkinson drug on farm     |
| U203y | All | [X]Int self poison antiparkinson drug other spec place        |
| U203z | All | [X]Intent self poison antiparkinson drug unspecif place       |
| U204. | All | [X]Intent self poison/exposure to psychotropic drug           |
| U2040 | All | [X]Int self poison/exposure to psychotropic drug at home      |
| U2041 | All | [X]Intent self poison psychotropic drug at res institut       |
| U2042 | All | [X]Int self poison psychotropic drug in school/pub admin area |
| U2043 | All | [X]Intent self pois psychotropic drug in sport/athletic area  |
| U2044 | All | [X]Int self pois psychotropic drug in street/highway          |
| U2045 | All | [X]Intent self pois psychotropic drug trade/service area      |
| U2046 | All | [X]Int self poison psychotropic drug indust/construct area    |
| U2047 | All | [X]Int self poison/exposure to psychotropic drug on farm      |
| U204y | All | [X]Int self poison psychotropic drug other spec place         |
| U204z | All | [X]Intent self poison psychotropic drug unspecif place        |
| U205. | All | [X]Intent self poison/exposure to narcotic drug               |
| U2050 | All | [X]Int self poison/exposure to narcotic drug at home          |
| U2051 | All | [X]Intent self poison narcotic drug at res institut           |
| U2052 | All | [X]Int self poison narcotic drug in school/pub admin area     |
| U2053 | All | [X]Intent self pois narcotic drug in sport/athletic area      |
| U2054 | All | [X]Int self pois narcotic drug in street/highway              |
| U2055 | All | [X]Intent self pois narcotic drug trade/service area          |
| U2056 | All | [X]Int self poison narcotic drug indust/construct area        |
| U2057 | All | [X]Int self poison/exposure to narcotic drug on farm          |
| U205y | All | [X]Int self poison narcotic drug other spec place             |
| U205z | All | [X]Intent self poison narcotic drug unspecif place            |
| U206. | All | [X]Intent self poison/exposure to hallucinogen                |
| U2060 | All | [X]Int self poison/exposure to hallucinogen at home           |
| U2061 | All | [X]Intent self poison hallucinogen at res institut            |
| U2062 | All | [X]Int self poison hallucinogen in school/pub admin area      |
| U2063 | All | [X]Intent self pois hallucinogen in sport/athletic area       |
| U2064 | All | [X]Int self pois hallucinogen in street/highway               |
| U2065 | All | [X]Intent self pois hallucinogen trade/service area           |
| U2066 | All | [X]Int self poison hallucinogen indust/construct area         |
| U2067 | All | [X]Int self poison/exposure to hallucinogen on farm           |
| U206y | All | [X]Int self poison hallucinogen other spec place              |
| U206z | All | [X]Intent self poison hallucinogen unspecif place             |
| U207. | All | [X]Intent self poison/exposure to oth autonom drug            |
| U2070 | All | [X]Int self poison/exposure to oth autonom drug at home       |
| U2071 | All | [X]Intent self poison oth autonom drug at res institut        |
| U2072 | All | [X]Int self poison oth autonom drug in school/pub admin area  |
| U2073 | All | [X]Intent self pois oth autonom drug in sport/athletic area   |
| U2074 | All | [X]Int self pois oth autonom drug in street/highway           |
| U2075 | All | [X]Intent self pois oth autonom drug trade/service area       |

|       |     |                                                                               |
|-------|-----|-------------------------------------------------------------------------------|
| U2076 | All | [X]Int self poison oth autonom drug indust/construct area                     |
| U2077 | All | [X]Int self poison/exposure to oth autonom drug on farm                       |
| U207y | All | [X]Int self poison oth autonom drug other spec place                          |
| U207z | All | [X]Intent self poison oth autonom drug unspecif place                         |
| U208. | All | [X]Intent self poison/exposure to other/unspec drug/medicament                |
| U2080 | All | [X]Int self poison/exposure to other/unspec drug/medicament at home           |
| U2081 | All | [X]Intent self poison other/unspec drug/medicament at res institut            |
| U2082 | All | [X]Int self poison other/unspec drug/medicament in school/pub admin area      |
| U2083 | All | [X]Intent self pois other/unspec drug/medicament in sport/athletic area       |
| U2084 | All | [X]Int self pois other/unspec drug/medicament in street/highway               |
| U2085 | All | [X]Intent self pois other/unspec drug/medicament trade/service area           |
| U2086 | All | [X]Int self poison other/unspec drug/medicament indust/construct area         |
| U2087 | All | [X]Int self poison/exposure to other/unspec drug/medicament on farm           |
| U208y | All | [X]Int self poison other/unspec drug/medicament other spec place              |
| U208z | All | [X]Intent self poison other/unspec drug/medicament unspecif place             |
| U209. | All | [X]Intent self poison/exposure to alcohol                                     |
| U2090 | All | [X]Int self poison/exposure to alcohol at home                                |
| U2091 | All | [X]Intent self poison alcohol at res institut                                 |
| U2092 | All | [X]Int self poison alcohol in school/pub admin area                           |
| U2093 | All | [X]Intent self pois alcohol in sport/athletic area                            |
| U2094 | All | [X]Int self pois alcohol in street/highway                                    |
| U2095 | All | [X]Intent self pois alcohol trade/service area                                |
| U2096 | All | [X]Int self poison alcohol indust/construct area                              |
| U2097 | All | [X]Int self poison/exposure alcohol on farm                                   |
| U209y | All | [X]Int self poison alcohol other spec place                                   |
| U209z | All | [X]Intent self poison alcohol unspecif place                                  |
| U20A. | All | [X]Intent self poison/exposure to organ solvent, halogen, hydrocarb           |
| U20A0 | All | [X]Int self poison/exposure to organ solvent, halogen, hydrocarb at home      |
| U20A1 | All | [X]Intent self poison organ solvent, halogen, hydrocarb at res institut       |
| U20A2 | All | [X]Int self poison organ solvent, halogen, hydrocarb in school/pub admin area |
| U20A3 | All | [X]Intent self pois organ solvent, halogen, hydrocarb in sport/athletic area  |
| U20A4 | All | [X]Int self pois organ solvent, halogen, hydrocarb in street/highway          |
| U20A5 | All | [X]Intent self pois organ solvent, halogen, hydrocarb trade/service area      |
| U20A6 | All | [X]Int self poison organ solvent, halogen, hydrocarb indust/construct area    |
| U20A7 | All | [X]Int self poison/exposure organ solvent, halogen, hydrocarb on farm         |
| U20Ay | All | [X]Int self poison organ solvent, halogen, hydrocarb other spec place         |

|                       |                |                                                                        |
|-----------------------|----------------|------------------------------------------------------------------------|
| U20Az                 | All            | [X]Intent self poison organ solvent, halogen, hydrocarb unspecif place |
| U20B.                 | All            | [X]Intent self poison/exposure to other gas/vapour                     |
| U20B0                 | All            | [X]Int self poison/exposure to other gas/vapour at home                |
| U20B1                 | All            | [X]Intent self poison other gas/vapour at res institut                 |
| U20B2                 | All            | [X]Int self poison other gas/vapour in school/pub admin area           |
| U20B3                 | All            | [X]Intent self pois other gas/vapour in sport/athletic area            |
| U20B4                 | All            | [X]Int self pois other gas/vapour in street/highway                    |
| U20B5                 | All            | [X]Intent self pois other gas/vapour trade/service area                |
| U20B6                 | All            | [X]Int self poison other gas/vapour indust/construct area              |
| U20B7                 | All            | [X]Int self poison/exposure other gas/vapourl on farm                  |
| U20By                 | All            | [X]Int self poison other gas/vapour other spec place                   |
| U20Bz                 | All            | [X]Intent self poison other gas/vapour unspecif place                  |
| U20C.                 | All            | [X]Intent self poison/exposure to pesticide                            |
| U20C0                 | All            | [X]Int self poison/exposure to pesticide at home                       |
| U20C1                 | All            | [X]Intent self poison pesticide at res institut                        |
| U20C2                 | All            | [X]Int self poison pesticide in school/pub admin area                  |
| U20C3                 | All            | [X]Intent self pois pesticide in sport/athletic area                   |
| U20C4                 | All            | [X]Int self pois pesticide in street/highway                           |
| U20C5                 | All            | [X]Intent self pois pesticidel trade/service area                      |
| U20C6                 | All            | [X]Int self poison pesticide indust/construct area                     |
| U20C7                 | All            | [X]Int self poison/exposure pesticide on farm                          |
| U20Cy                 | All            | [X]Int self poison pesticide other spec place                          |
| U20Cz                 | All            | [X]Intent self poison pesticide unspecif place                         |
| U20y.                 | All            | [X]Intent self poison/exposure to unspecif chemical                    |
| U20y0                 | All            | [X]Int self poison/exposure to unspecif chemical at home               |
| U20y1                 | All            | [X]Intent self poison unspecif chemical at res institut                |
| U20y2                 | All            | [X]Int self poison unspecif chemical in school/pub admin area          |
| U20y3                 | All            | [X]Intent self pois unspecif chemical in sport/athletic area           |
| U20y4                 | All            | [X]Int self pois unspecif chemical in street/highway                   |
| U20y5                 | All            | [X]Intent self pois unspecif chemical trade/service area               |
| U20y6                 | All            | [X]Int self poison unspecif chemical indust/construct area             |
| U20y7                 | All            | [X]Int self poison/exposure unspecif chemical on farm                  |
| U20yy                 | All            | [X]Int self poison unspecif chemical other spec place                  |
| U20yz                 | All            | [X]Intent self poison unspecif chemical unspecif place                 |
| 14K0.                 | All            | H/O: repeated overdose                                                 |
| 1JP..                 | All            | Suspected drug overdose                                                |
| TK...                 | All            | Cause of overdose - deliberate                                         |
| <b>Read CTV3 Code</b> | <b>Term ID</b> | <b>Description</b>                                                     |
| U200.                 | All            | [X]Intent self poison/exposure to nonopioid analgesic                  |
| U2000                 | All            | [X]Int self poison/exposure to nonopioid analgesic at home             |
| U2001                 | All            | [X]Intent self poison nonopioid analgesic at res institut              |
| U2002                 | All            | [X]Int self poison nonopioid analgesic in school/pub admin area        |
| U2003                 | All            | [X]Intent self pois nonopioid analgesic in sport/athletic area         |



|       |     |                                                                |
|-------|-----|----------------------------------------------------------------|
| U2004 | All | [X]Int self pois to nonopioid analgesic in street/highway      |
| U2005 | All | [X]Intent self pois to nonopioid analgesic trade/service area  |
| U2006 | All | [X]Int self pois to nonopioid analgesic indust/construct area  |
| U2007 | All | [X]Int self poison/exposure to nonopioid analgesic on farm     |
| U200y | All | [X]Int self poison nonopioid analgesic other spec place        |
| U200z | All | [X]Intent self poison to nonopioid analgesic unspecif place    |
| U201. | All | [X]Intent self poison/exposure to antiepileptic                |
| U2010 | All | [X]Int self poison/exposure to antiepileptic at home           |
| U2011 | All | [X]Intent self poison antiepileptic at res institut            |
| U2012 | All | [X]Int self poison antiepileptic in school/pub admin area      |
| U2013 | All | [X]Intent self pois antiepileptic in sport/athletic area       |
| U2014 | All | [X]Int self pois antiepileptic in street/highway               |
| U2015 | All | [X]Intent self pois antiepileptic trade/service area           |
| U2016 | All | [X]Int self poison antiepileptic indust/construct area         |
| U2017 | All | [X]Int self poison/exposure to antiepileptic on farm           |
| U201y | All | [X]Int self poison antiepileptic other spec place              |
| U201z | All | [X]Intent self poison antiepileptic unspecif place             |
| U2030 | All | [X]Int self poison/exposure to antiparkinson drug at home      |
| U2031 | All | [X]Intent self poison antiparkinson drug at res institut       |
| U2032 | All | [X]Int self poison antiparkinson drug in school/pub admin area |
| U2033 | All | [X]Intent self pois antiparkinson drug in sport/athletic area  |
| U2034 | All | [X]Int self pois antiparkinson drug in street/highway          |
| U2035 | All | [X]Intent self pois antiparkinson drug trade/service area      |
| U2036 | All | [X]Int self poison antiparkinson drug indust/construct area    |
| U2037 | All | [X]Int self poison/exposure to antiparkinson drug on farm      |
| U203y | All | [X]Int self poison antiparkinson drug other spec place         |
| U203z | All | [X]Intent self poison antiparkinson drug unspecif place        |
| XE22f | All | [X]Intent self poison/exposure to narcotic drug                |
| U2050 | All | [X]Int self poison/exposure to narcotic drug at home           |
| U2051 | All | [X]Intent self poison narcotic drug at res institut            |
| U2052 | All | [X]Int self poison narcotic drug in school/pub admin area      |
| U2053 | All | [X]Intent self pois narcotic drug in sport/athletic area       |
| U2054 | All | [X]Int self pois narcotic drug in street/highway               |
| U2055 | All | [X]Intent self pois narcotic drug trade/service area           |
| U2056 | All | [X]Int self poison narcotic drug indust/construct area         |
| U2057 | All | [X]Int self poison/exposure to narcotic drug on farm           |
| U205y | All | [X]Int self poison narcotic drug other spec place              |
| U205z | All | [X]Intent self poison narcotic drug unspecif place             |
| U206. | All | [X]Intent self poison/exposure to hallucinogen                 |
| U2060 | All | [X]Int self poison/exposure to hallucinogen at home            |
| U2061 | All | [X]Intent self poison hallucinogen at res institut             |
| U2062 | All | [X]Int self poison hallucinogen in school/pub admin area       |
| U2063 | All | [X]Intent self pois hallucinogen in sport/athletic area        |
| U2064 | All | [X]Int self pois hallucinogen in street/highway                |
| U2065 | All | [X]Intent self pois hallucinogen trade/service area            |



|       |     |                                                                          |
|-------|-----|--------------------------------------------------------------------------|
| U2066 | All | [X]Int self poison hallucinogen indust/construct area                    |
| U2067 | All | [X]Int self poison/exposure to hallucinogen on farm                      |
| U206y | All | [X]Int self poison hallucinogen other spec place                         |
| U206z | All | [X]Intent self poison hallucinogen unspecif place                        |
| U207. | All | [X]Intent self poison/exposure to oth autonom drug                       |
| U2070 | All | [X]Int self poison/exposure to oth autonom drug at home                  |
| U2071 | All | [X]Intent self poison oth autonom drug at res institut                   |
| U2072 | All | [X]Int self poison oth autonom drug in school/pub admin area             |
| U2073 | All | [X]Intent self pois oth autonom drug in sport/athletic area              |
| U2074 | All | [X]Int self pois oth autonom drug in street/highway                      |
| U2075 | All | [X]Intent self pois oth autonom drug trade/service area                  |
| U2076 | All | [X]Int self poison oth autonom drug indust/construct area                |
| U2077 | All | [X]Int self poison/exposure to oth autonom drug on farm                  |
| U207y | All | [X]Int self poison oth autonom drug other spec place                     |
| U207z | All | [X]Intent self poison oth autonom drug unspecif place                    |
| U208. | All | [X]Intent self poison/exposure to other/unspec drug/medicament           |
| U2080 | All | [X]Int self poison/exposure to other/unspec drug/medicament at home      |
| U2081 | All | [X]Intent self poison other/unspec drug/medicament at res institut       |
| U2082 | All | [X]Int self poison other/unspec drug/medicament in school/pub admin area |
| U2083 | All | [X]Intent self pois other/unspec drug/medicament in sport/athletic area  |
| U2084 | All | [X]Int self pois other/unspec drug/medicament in street/highway          |
| U2085 | All | [X]Intent self pois other/unspec drug/medicament trade/service area      |
| U2086 | All | [X]Int self poison other/unspec drug/medicament indust/construct area    |
| U2087 | All | [X]Int self poison/exposure to other/unspec drug/medicament on farm      |
| U208y | All | [X]Int self poison other/unspec drug/medicament other spec place         |
| U208z | All | [X]Intent self poison other/unspec drug/medicament unspecif place        |
| SyuFc | All | [X]Poisoning by other & unspecified drugs and biologic substances        |
| U209. | All | [X]Intent self poison/exposure to alcohol                                |
| U2090 | All | [X]Int self poison/exposure to alcohol at home                           |
| U2091 | All | [X]Intent self poison alcohol at res institut                            |
| U2092 | All | [X]Int self poison alcohol in school/pub admin area                      |
| U2093 | All | [X]Intent self pois alcohol in sport/athletic area                       |
| U2094 | All | [X]Int self pois alcohol in street/highway                               |
| U2095 | All | [X]Intent self pois alcohol trade/service area                           |
| U2096 | All | [X]Int self poison alcohol indust/construct area                         |
| U2097 | All | [X]Int self poison/exposure alcohol on farm                              |
| U209y | All | [X]Int self poison alcohol other spec place                              |
| U209z | All | [X]Intent self poison alcohol unspecif place                             |
| U20A. | All | [X]Intent self poison/exposure to organ solvent, halogen, hydrocarb      |
| U20A0 | All | [X]Int self poison/exposure to organ solvent, halogen, hydrocarb at home |

|       |     |                                                                               |
|-------|-----|-------------------------------------------------------------------------------|
| U20A1 | All | [X]Intent self poison organ solvent, halogen, hydrocarbat res institut        |
| U20A2 | All | [X]Int self poison organ solvent, halogen, hydrocarb in school/pub admin area |
| U20A3 | All | [X]Intent self pois organ solvent, halogen, hydrocarb in sport/athletic area  |
| U20A4 | All | [X]Int self pois organ solvent, halogen, hydrocarb in street/highway          |
| U20A5 | All | [X]Intent self pois organ solvent, halogen, hydrocarb trade/service area      |
| U20A6 | All | [X]Int self poison organ solvent, halogen, hydrocarb indust/construct area    |
| U20A7 | All | [X]Int self poison/exposure organ solvent, halogen, hydrocarb on farm         |
| U20Ay | All | [X]Int self poison organ solvent, halogen, hydrocarb other spec place         |
| U20Az | All | [X]Intent self poison organ solvent, halogen, hydrocarb unspecif place        |
| XE22g | All | [X]Intent self poison/exposure to other gas/vapour                            |
| U20B0 | All | [X]Int self poison/exposure to other gas/vapour at home                       |
| U20B1 | All | [X]Intent self poison other gas/vapour at res institut                        |
| U20B2 | All | [X]Int self poison other gas/vapour in school/pub admin area                  |
| U20B3 | All | [X]Intent self pois other gas/vapour in sport/athletic area                   |
| U20B4 | All | [X]Int self pois other gas/vapour in street/highway                           |
| U20B5 | All | [X]Intent self pois other gas/vapour trade/service area                       |
| U20B6 | All | [X]Int self poison other gas/vapour indust/construct area                     |
| U20B7 | All | [X]Int self poison/exposure other gas/vapourl on farm                         |
| U20By | All | [X]Int self poison other gas/vapour other spec place                          |
| U20Bz | All | [X]Intent self poison other gas/vapour unspecif place                         |
| U20C. | All | [X]Intent self poison/exposure to pesticide                                   |
| U20C0 | All | [X]Int self poison/exposure to pesticide at home                              |
| U20C1 | All | [X]Intent self poison pesticide at res institut                               |
| U20C2 | All | [X]Int self poison pesticide in school/pub admin area                         |
| U20C3 | All | [X]Intent self pois pesticide in sport/athletic area                          |
| U20C4 | All | [X]Int self pois pesticide in street/highway                                  |
| U20C5 | All | [X]Intent self pois pesticidel trade/service area                             |
| U20C6 | All | [X]Int self poison pesticide indust/construct area                            |
| U20C7 | All | [X]Int self poison/exposure pesticide on farm                                 |
| U20Cy | All | [X]Int self poison pesticide other spec place                                 |
| U20Cz | All | [X]Intent self poison pesticide unspecif place                                |
| Xa59l | All | Intentional pesticide product poisoning                                       |
| U20y. | All | [X]Intent self poison/exposure to unspecif chemical                           |
| U20y0 | All | [X]Int self poison/exposure to unspecif chemical at home                      |
| U20y1 | All | [X]Intent self poison unspecif chemical at res institut                       |
| U20y2 | All | [X]Int self poison unspecif chemical in school/pub admin area                 |
| U20y3 | All | [X]Intent self pois unspecif chemical in sport/athletic area                  |
| U20y4 | All | [X]Int self pois unspecif chemical in street/highway                          |
| U20y5 | All | [X]Intent self pois unspecif chemical trade/service area                      |
| U20y6 | All | [X]Int self poison unspecif chemical indust/construct area                    |

|       |     |                                                                                     |
|-------|-----|-------------------------------------------------------------------------------------|
| U20y7 | All | [X]Int self poison/exposure unspecif chemical on farm                               |
| U20yy | All | [X]Int self poison unspecif chemical other spec place                               |
| U20yz | All | [X]Intent self poison unspecif chemical unspecif place                              |
| TK0z. | All | Suicide and selfinflicted poisoning by solid and liquid substances NOS              |
| XM0Ba | All | Deliberate self poisoning                                                           |
| TK0.. | All | Suicide and selfinflicted poisoning by solid and liquid substances                  |
| X71Am | All | Deliberate overdose of drug or pharmaceutical preparation                           |
| TK00. | All | Suicide and selfinflicted poisoning by analgesics, antipyretics and anti-rheumatics |
| TK01. | All | Suicide and selfinflicted poisoning by barbiturates                                 |
| TK010 | All | Suicide and self inflicted injury by amobarbital                                    |
| TK011 | All | Suicide and self inflicted injury by Barbitone                                      |
| TK012 | All | Suicide and self inflicted injury by Butabarbitone                                  |
| TK013 | All | Suicide and self inflicted injury by Pentabarbitone                                 |
| TK014 | All | Suicide and self inflicted injury by phenobarbital                                  |
| TK015 | All | Suicide and self inflicted injury by secobarbital                                   |
| TK01z | All | Suicide and self inflicted injury by barbiturates                                   |
| TK02. | All | Suicide and selfinflicted poisoning by other sedatives and hypnotics                |
| TK03. | All | Suicide and selfinflicted poisoning by tranquillisers and other psychotropic agents |
| TK04. | All | Suicide and selfinflicted poisoning by other drugs and medicines                    |
| TK05. | All | Suicide and selfinflicted poisoning by drug or medicine NOS                         |
| X71Ap | All | Deliberate overdose of aspirin                                                      |
| X71Ax | All | Deliberate overdose of diazepam                                                     |
| X71Av | All | Deliberate overdose of methadone                                                    |
| X71Az | All | Deliberate overdose of temazepam                                                    |
| X71Ar | All | Deliberate overdose of co-proxamol                                                  |
| X71At | All | Deliberate overdose of diamorphine                                                  |
| X71Aw | All | Deliberate overdose of benzodiazepine                                               |
| X71Au | All | Deliberate overdose of dihydrocodeine                                               |
| X71As | All | Deliberate overdose of opiate analgesic                                             |
| X71Ay | All | Deliberate overdose of chlordiazepoxide                                             |
| X71Aq | All | Deliberate overdose of combined analgesic                                           |
| X71An | All | Deliberate overdose of non-opiate analgesics                                        |
| Xa0Jl | All | Deliberate overdose of non-steroidal anti-inflammatory agent                        |
| XaR4S | All | Intentional overdose of prescription only medication                                |
| Xa62F | All | Intentional over-the-counter product overdose                                       |
| Xa65i | All | Intentional bismuth compound overdose                                               |
| Xa65m | All | Intentional sucralfate overdose                                                     |
| Xa65q | All | Intentional liquorice overdose                                                      |
| Xa65u | All | Intentional misoprostol overdose                                                    |
| Xa65z | All | Intentional cimetidine overdose                                                     |
| Xa663 | All | Intentional famotidine overdose                                                     |
| Xa667 | All | Intentional nizatidine overdose                                                     |

|       |     |                                                             |
|-------|-----|-------------------------------------------------------------|
| Xa66B | All | Intentional ranitidine overdose                             |
| Xa66D | All | Intentional overdose of H2 antagonist                       |
| Xa66I | All | Intentional omeprazole overdose                             |
| Xa66M | All | Intentional lansoprazole overdose                           |
| Xa66Q | All | Intentional carbenoxolone overdose                          |
| Xa66U | All | Intentional pirenzepine overdose                            |
| Xa66Y | All | Intentional 5-aminosalicylic acid overdose                  |
| Xa66d | All | Intentional aluminium hydroxide overdose                    |
| Xa66h | All | Intentional magnesium trisilicate overdose                  |
| Xa66l | All | Intentional loperamide overdose                             |
| Xa66p | All | Intentional kaolin overdose                                 |
| Xa66u | All | Intentional cisapride overdose                              |
| Xa66z | All | Intentional nabilone overdose                               |
| Xa673 | All | Intentional domperidone overdose                            |
| Xa677 | All | Intentional metoclopramide overdose                         |
| Xa67B | All | Intentional 5-HT <sub>3</sub> -receptor antagonist overdose |
| Xa67G | All | Intentional bisacodyl overdose                              |
| Xa67K | All | Intentional dantron overdose                                |
| Xa67O | All | Intentional sodium picosulfate overdose                     |
| Xa67S | All | Intentional lactulose overdose                              |
| Xa67W | All | Intentional magnesium sulphate overdose                     |
| Xa67a | All | Intentional bulk-forming laxative overdose                  |
| Xa67e | All | Intentional anthraquinone laxative overdose                 |
| Xa67i | All | Intentional cascara overdose                                |
| Xa67m | All | Intentional senna overdose                                  |
| Xa67q | All | Intentional docusate overdose                               |
| Xa67v | All | Intentional castor oil overdose                             |
| Xa67z | All | Intentional phenolphthalein overdose                        |
| Xa684 | All | Intentional dioctyl sulphosuccinate overdose                |
| Xa688 | All | Intentional antispasmodic overdose                          |
| Xa68C | All | Intentional bile agent overdose                             |
| Xa69o | All | Intentional immunostimulant overdose                        |
| Xa69u | All | Intentional mitobronitol overdose                           |
| Xa69y | All | Intentional busulfan overdose                               |
| Xa6A2 | All | Intentional treosulfan overdose                             |
| Xa6A6 | All | Intentional thiotepa overdose                               |
| Xa6AB | All | Intentional chlorambucil overdose                           |
| Xa6AF | All | Intentional cyclophosphamide overdose                       |
| Xa6AJ | All | Intentional ethoglucid overdose                             |
| Xa6AN | All | Intentional ifosfamide overdose                             |
| Xa6AR | All | Intentional melphalan overdose                              |
| Xa6AV | All | Intentional estramustine overdose                           |
| Xa6AZ | All | Intentional chlormethine overdose                           |
| Xa6Ae | All | Intentional carmustine overdose                             |
| Xa6Ai | All | Intentional lomustine overdose                              |

|       |     |                                                  |
|-------|-----|--------------------------------------------------|
| Xa6An | All | Intentional dacarbazine overdose                 |
| Xa6As | All | Intentional dactinomycin overdose                |
| Xa6Aw | All | Intentional bleomycin overdose                   |
| Xa6B0 | All | Intentional mitomycin overdose                   |
| Xa6B4 | All | Intentional plicamycin overdose                  |
| Xa6B8 | All | Intentional aclarubicin overdose                 |
| Xa6BC | All | Intentional mitoxantrone overdose                |
| Xa6BG | All | Intentional doxorubicin overdose                 |
| Xa6BK | All | Intentional epirubicin overdose                  |
| Xa6BO | All | Intentional idarubicin overdose                  |
| Xa6BT | All | Intentional mercuric oxide overdose              |
| Xa6BX | All | Intentional methotrexate overdose                |
| Xa6Bb | All | Intentional mercaptopurine overdose              |
| Xa6Bf | All | Intentional tioguanine overdose                  |
| Xa6Bj | All | Intentional pentostatin overdose                 |
| Xa6Bn | All | Intentional cytarabine overdose                  |
| Xa6Br | All | Intentional fluorouracil overdose                |
| Xa6Bv | All | Intentional etoposide overdose                   |
| Xa6Bz | All | Intentional amsacrine overdose                   |
| Xa6C3 | All | Intentional carboplatin overdose                 |
| Xa6C7 | All | Intentional cisplatin overdose                   |
| Xa6CB | All | Intentional hydroxycarbamide overdose            |
| Xa6CF | All | Intentional procarbazine overdose                |
| Xa6CJ | All | Intentional razoxane overdose                    |
| Xa6CN | All | Intentional crisantaspase overdose               |
| Xa6CR | All | Intentional paclitaxel overdose                  |
| Xa6CV | All | Intentional fludarabine overdose                 |
| Xa6CZ | All | Intentional aminoglutethimide overdose           |
| Xa6Ce | All | Intentional trilostane overdose                  |
| Xa6Ci | All | Intentional tamoxifen overdose                   |
| Xa6Cm | All | Intentional formestane overdose                  |
| Xa6Cr | All | Intentional vinblastine overdose                 |
| Xa6Cv | All | Intentional vincristine overdose                 |
| Xa6Cz | All | Intentional vindesine overdose                   |
| Xa6D4 | All | Intentional ciclosporin overdose                 |
| Xa6D8 | All | Intentional azathioprine overdose                |
| Xa6DD | All | Intentional central appetite depressant overdose |
| Xa6DI | All | Intentional levodopa overdose                    |
| Xa6DM | All | Intentional amantadine overdose                  |
| Xa6DQ | All | Intentional lisuride overdose                    |
| Xa6DU | All | Intentional bromocriptine overdose               |
| Xa6DZ | All | Intentional lithium overdose                     |
| Xa6Dd | All | Intentional amitriptyline overdose               |
| Xa6Dh | All | Intentional amoxapine overdose                   |
| Xa6DI | All | Intentional butriptyline overdose                |

|       |     |                                                  |
|-------|-----|--------------------------------------------------|
| Xa6Dp | All | Intentional clomipramine overdose                |
| Xa6Dt | All | Intentional desipramine overdose                 |
| Xa6Dx | All | Intentional dosulepin overdose                   |
| Xa6E1 | All | Intentional doxepin overdose                     |
| Xa6E5 | All | Intentional imipramine overdose                  |
| Xa6E9 | All | Intentional iprindole overdose                   |
| Xa6ED | All | Intentional lofepramine overdose                 |
| Xa6EH | All | Intentional nortriptyline overdose               |
| Xa6EL | All | Intentional protriptyline overdose               |
| Xa6EP | All | Intentional trimipramine overdose                |
| Xa6Zp | All | Intentional overdose of tricyclic antidepressant |
| Xa6EU | All | Intentional phenelzine overdose                  |
| Xa6EY | All | Intentional iproniazid overdose                  |
| Xa6Ec | All | Intentional isocarboxazid overdose               |
| Xa6Eg | All | Intentional tranlycypromine overdose             |
| Xa6Ek | All | Intentional moclobemide overdose                 |
| Xa6Eo | All | Intentional tryptophan overdose                  |
| Xa6Es | All | Intentional venlafaxine overdose                 |
| Xa6Ex | All | Intentional sertraline overdose                  |
| Xa6F1 | All | Intentional paroxetine overdose                  |
| Xa6F5 | All | Intentional nefazodone overdose                  |
| Xa6F9 | All | Intentional citalopram overdose                  |
| Xa6FD | All | Intentional fluoxetine overdose                  |
| Xa6FH | All | Intentional fluvoxamine overdose                 |
| Xa6FM | All | Intentional maprotiline overdose                 |
| Xa6FQ | All | Intentional mianserin overdose                   |
| Xa6FU | All | Intentional trazodone overdose                   |
| Xa6FY | All | Intentional viloxazine overdose                  |
| Xa6Fd | All | Intentional beclamide overdose                   |
| Xa6Fh | All | Intentional lamotrigine overdose                 |
| Xa6Fl | All | Intentional piracetam overdose                   |
| Xa6Fp | All | Intentional gabapentin overdose                  |
| Xa6Ft | All | Intentional overdose by sodium valproate         |
| Xa6Fy | All | Intentional methylphenobarbital overdose         |
| Xa6G2 | All | Intentional phenobarbital overdose               |
| Xa6G6 | All | Intentional primidone overdose                   |
| Xa6GA | All | Intentional overdose by carbamazepine            |
| Xa6GE | All | Intentional vigabatrin overdose                  |
| X711g | All | Accidental overdose of phenytoin                 |
| Xa6GL | All | Intentional ethosuximide overdose                |
| Xa6GP | All | Intentional clonazepam overdose                  |
| Xa6GV | All | Intentional zopiclone overdose                   |
| Xa6GZ | All | Intentional zolpidem overdose                    |
| Xa6Gd | All | Intentional chlormezanone overdose               |
| Xa6Gh | All | Intentional methyprylone overdose                |

|       |     |                                              |
|-------|-----|----------------------------------------------|
| Xa6Gl | All | Intentional paraldehyde overdose             |
| Xa6Gq | All | Intentional amobarbital overdose             |
| Xa6Gu | All | Intentional butabarbital overdose            |
| Xa6Gy | All | Intentional cyclobarbital overdose           |
| Xa6H2 | All | Intentional secobarbital overdose            |
| Xa6H7 | All | Intentional flunitrazepam overdose           |
| Xa6HB | All | Intentional flurazepam overdose              |
| Xa6HF | All | Intentional loprazolam overdose              |
| Xa6HJ | All | Intentional lorazepam overdose               |
| Xa6HN | All | Intentional nitrazepam overdose              |
| Xa6HR | All | Intentional triazolam overdose               |
| Xa6HV | All | Intentional alprazolam overdose              |
| Xa6HZ | All | Intentional bromazepam overdose              |
| X71Ay | All | Deliberate overdose of chlordiazepoxide      |
| Xa6Hg | All | Intentional clobazam overdose                |
| Xa6Hk | All | Intentional dipotassium clorazepate overdose |
| Xa6Ho | All | Intentional ketazolam overdose               |
| Xa6Hs | All | Intentional medazepam overdose               |
| Xa6Hw | All | Intentional oxazepam overdose                |
| Xa6I0 | All | Intentional prazepam overdose                |
| Xa6I4 | All | Intentional midazolam overdose               |
| X71Ax | All | Deliberate overdose of diazepam              |
| Xa6I8 | All | Intentional lorazepam overdose               |
| X71Az | All | Deliberate overdose of temazepam             |
| X71Aw | All | Deliberate overdose of benzodiazepine        |
| Xa6IL | All | Intentional meprobamate overdose             |
| Xa6IQ | All | Intentional chloral hydrate overdose         |
| Xa6IU | All | Intentional dichloralphenazone overdose      |
| Xa6IY | All | Intentional triclofos sodium overdose        |
| Xa6Ic | All | Intentional buspirone overdose               |
| Xa6Ig | All | Intentional clomethiazole overdose           |
| Xa6Il | All | Intentional sulphuride overdose              |
| Xa6Ip | All | Intentional loxapine overdose                |
| Xa6It | All | Intentional clozapine overdose               |
| Xa6Ix | All | Intentional risperidone overdose             |
| Xa6J1 | All | Intentional tetrabenazine overdose           |
| Xa6J6 | All | Intentional benperidol overdose              |
| Xa6JA | All | Intentional trifluoperidol overdose          |
| Xa6JE | All | Intentional haloperidol overdose             |
| Xa6JI | All | Intentional droperidol overdose              |
| Xa6JN | All | Intentional pimozide overdose                |
| Xa6JR | All | Intentional fluspirilene overdose            |
| Xa6JW | All | Intentional levomepromazine overdose         |
| Xa6Ja | All | Intentional pericyazine overdose             |
| Xa6Je | All | Intentional fluphenazine decanoate overdose  |



|       |     |                                                       |
|-------|-----|-------------------------------------------------------|
| Xa6Ji | All | Intentional fluphenazine enanthate overdose           |
| Xa6Jm | All | Intentional thiethylperazine overdose                 |
| Xa6Jq | All | Intentional chlorpromazine overdose                   |
| Xa6Ju | All | Intentional pipotiazine overdose                      |
| Xa6Jy | All | Intentional promazine overdose                        |
| Xa6K2 | All | Intentional thioridazine overdose                     |
| Xa6K6 | All | Intentional perphenazine overdose                     |
| Xa6KA | All | Intentional prochlorperazine overdose                 |
| Xa6KE | All | Intentional trifluoperazine overdose                  |
| Xa6KJ | All | Intentional chlorprothixene overdose                  |
| Xa6KN | All | Intentional flupentixol decanoate overdose            |
| Xa6KR | All | Intentional zuclopenthixol decanoate overdose         |
| Xa6KV | All | Intentional zuclopenthixol overdose                   |
| Xa6KZ | All | Intentional flupentixol overdose                      |
| Xa6Kd | All | Intentional oxypertine overdose                       |
| Xa6Kh | All | Intentional remoxipride overdose                      |
| Xa6Kj | All | Intentional overdose of non-barbiturate hypnotic      |
| Xa6Ko | All | Intentional selegiline overdose                       |
| Xa6Kt | All | Intentional amphetamine overdose                      |
| Xa6Ky | All | Intentional antabuse overdose                         |
| Xa6L3 | All | Intentional cannabis overdose                         |
| Xa6L7 | All | Intentional overdose by lysergic acid                 |
| Xa6LB | All | Intentional psilocybin overdose                       |
| Xa6LF | All | Intentional mescaline overdose                        |
| Xa6LJ | All | Intentional overdose of ecstasy                       |
| Xa6LN | All | Intentional overdose by cocaine                       |
| Xa6LR | All | Intentional overdose by crack cocaine                 |
| Xa6LV | All | Intentional caffeine overdose                         |
| Xa6Lb | All | Intentional atenolol overdose                         |
| Xa6Lf | All | Intentional propranolol overdose                      |
| Xa6Lh | All | Intentional overdose of beta-adrenergic blocking drug |
| Xa6Lm | All | Intentional phenoxybenzamine overdose                 |
| Xa6Lq | All | Intentional nicotine overdose                         |
| Xa6Lu | All | Intentional overdose by calcium-channel blockers      |
| Xa6Lz | All | Intentional pilocarpine overdose                      |
| Xa6M3 | All | Intentional acetylcholine overdose                    |
| Xa6M7 | All | Intentional anticholinesterase overdose               |
| Xa6MD | All | Intentional metaraminol overdose                      |
| Xa6MI | All | Intentional salbutamol overdose                       |
| Xa6ML | All | Intentional overdose of isoprenaline                  |
| Xa6MQ | All | Intentional clonidine overdose                        |
| Xa6MV | All | Intentional hyoscine overdose                         |
| Xa6MZ | All | Intentional atropine overdose                         |
| Xa6Me | All | Intentional acetylcysteine overdose                   |
| Xa6Mj | All | Intentional nikethamide overdose                      |



|       |     |                                                  |
|-------|-----|--------------------------------------------------|
| Xa6Mo | All | Intentional chlorphenamine overdose              |
| Xa6Ms | All | Intentional diphenhydramine overdose             |
| Xa6N0 | All | Intentional thonzylamine overdose                |
| Xa6N4 | All | Intentional tripeleminamine overdose             |
| Xa6N8 | All | Intentional hydroxyzine overdose                 |
| Xa6ND | All | Intentional aminophylline overdose               |
| Xa6NH | All | Intentional theophylline overdose                |
| Xa6NL | All | Intentional bronchodilator preparations overdose |
| Xa6NR | All | Intentional dithranol overdose                   |
| Xa6NW | All | Intentional gamolenic acid overdose              |
| Xa6Nb | All | Intentional etretinate overdose                  |
| Xa6Nf | All | Intentional acitretin overdose                   |
| Xa6Nj | All | Intentional tretinoin overdose                   |
| Xa6Nn | All | Intentional isotretinoin overdose                |
| Xa6Nt | All | Intentional allopurinol overdose                 |
| Xa6Nx | All | Intentional colchicine overdose                  |
| Xa6O3 | All | Intentional baclofen overdose                    |
| Xa6O7 | All | Intentional methocarbamol overdose               |
| Xa6OB | All | Intentional gold salt overdose                   |
| Xa6OG | All | Intentional papaverine overdose                  |
| Xa6OL | All | Intentional prostaglandin overdose               |
| Xa6OS | All | Intentional naloxone overdose                    |
| Xa6OW | All | Intentional protamine sulphate overdose          |
| Xa6Oa | All | Intentional alternative medicine overdose        |
| Xa6Oj | All | Intentional flucytosine overdose                 |
| Xa6On | All | Intentional griseofulvin overdose                |
| Xa6Or | All | Intentional amphotericin B overdose              |
| Xa6Ov | All | Intentional nystatin overdose                    |
| Xa6P0 | All | Intentional idoxuridine overdose                 |
| Xa6P5 | All | Intentional pyrimethamine overdose               |
| Xa6P9 | All | Intentional chloroquine overdose                 |
| Xa6PD | All | Intentional primaquine overdose                  |
| Xa6PH | All | Intentional quinine overdose                     |
| Xa6PL | All | Intentional mefloquine overdose                  |
| Xa6PP | All | Intentional proguanil overdose                   |
| Xa6PU | All | Intentional piperazine overdose                  |
| Xa6PY | All | Intentional tiabendazole overdose                |
| Xa6Pe | All | Intentional kanamycin overdose                   |
| Xa6Pi | All | Intentional streptomycin overdose                |
| Xa6Pm | All | Intentional gentamicin overdose                  |
| Xa6Pq | All | Intentional tobramycin overdose                  |
| Xa6Pu | All | Intentional netilmicin overdose                  |
| Xa6Pz | All | Intentional erythromycin overdose                |
| Xa6Q3 | All | Intentional azithromycin overdose                |
| Xa6Q7 | All | Intentional clarithromycin overdose              |

|       |     |                                                |
|-------|-----|------------------------------------------------|
| Xa6QB | All | Intentional sodium fusidate overdose           |
| Xa6QF | All | Intentional spectinomycin overdose             |
| Xa6QJ | All | Intentional vancomycin overdose                |
| Xa6QN | All | Intentional trimethoprim overdose              |
| Xa6QR | All | Intentional nitrofurantoin derivative overdose |
| Xa6QV | All | Intentional fusidic acid overdose              |
| Xa6QZ | All | Intentional 4-quinolones overdose              |
| Xa6Qe | All | Intentional ampicillin overdose                |
| Xa6Qj | All | Intentional cloxacillin overdose               |
| Xa6Qn | All | Intentional carbenicillin overdose             |
| Xa6Qr | All | Intentional flucloxacillin overdose            |
| Xa6Qx | All | Intentional cefadroxil overdose                |
| Xa6R1 | All | Intentional cefalexin overdose                 |
| Xa6R5 | All | Intentional cephalothin overdose               |
| Xa6R9 | All | Intentional cefazolin overdose                 |
| Xa6RD | All | Intentional cefradine overdose                 |
| Xa6RH | All | Intentional latamoxef overdose                 |
| Xa6RM | All | Intentional cefaclor overdose                  |
| Xa6RQ | All | Intentional cefuroxime overdose                |
| Xa6RU | All | Intentional cephmandole overdose               |
| Xa6RZ | All | Intentional cefotaxime overdose                |
| Xa6Rd | All | Intentional ceftazidime overdose               |
| Xa6Rh | All | Intentional ceftizoxime overdose               |
| Xa6Rl | All | Intentional cefixime overdose                  |
| Xa6Rp | All | Intentional cefodizime overdose                |
| Xa6Rt | All | Intentional cefpodoxime overdose               |
| Xa6Rx | All | Intentional ceftriaxone overdose               |
| Xa6SA | All | Intentional cefpirome overdose                 |
| Xa6S1 | All | Intentional ceftibuten overdose                |
| Xa6S5 | All | Intentional cefsulodin overdose                |
| Xa6SG | All | Intentional doxycycline overdose               |
| Xa6SK | All | Intentional minocycline overdose               |
| Xa6SO | All | Intentional oxytetracycline overdose           |
| Xa6SS | All | Intentional tetracycline overdose              |
| Xa6SW | All | Intentional chloramphenicol overdose           |
| Xa6Sa | All | Intentional co-trimoxazole overdose            |
| Xa6Sf | All | Intentional antimony compound overdose         |
| Xa6Sj | All | Intentional hydroxyquinoline overdose          |
| Xa6Sp | All | Intentional rifampin overdose                  |
| Xa6St | All | Intentional isoniazid overdose                 |
| Xa6Sx | All | Intentional ethambutol overdose                |
| Xa6T1 | All | Intentional antileprotic drug overdose         |
| Xa6T5 | All | Intentional pesticide product overdose         |
| Xa6TB | All | Intentional gamma globulin overdose            |
| Xa6TF | All | Intentional vaccine overdose                   |

|       |     |                                                |
|-------|-----|------------------------------------------------|
| Xa6TJ | All | Intentional antisera overdose                  |
| Xa6TO | All | Intentional glucagon overdose                  |
| Xa6TU | All | Intentional carbimazole overdose               |
| Xa6TY | All | Intentional thiouracil overdose                |
| Xa6Td | All | Intentional prednisone overdose                |
| Xa6Th | All | Intentional dexamethasone overdose             |
| Xa6Tl | All | Intentional insulin overdose                   |
| Xa6Tr | All | Intentional acetohexamide overdose             |
| Xa6Tv | All | Intentional chlorpropamide overdose            |
| Xa6Tz | All | Intentional overdose by glibenclamide          |
| Xa6U3 | All | Intentional tolbutamide overdose               |
| Xa6U8 | All | Intentional overdose by metformin              |
| Xa6UD | All | Intentional progestogen overdose               |
| Xa6UI | All | Intentional nandrolone overdose                |
| Xa6UM | All | Intentional oxymetholone overdose              |
| Xa6UQ | All | Intentional methandriol overdose               |
| Xa6UU | All | Intentional oral contraceptive overdose        |
| Xa6UZ | All | Intentional testosterone overdose              |
| Xa6Ud | All | Intentional oestrogen overdose                 |
| Xa6Ui | All | Intentional liothyronine overdose              |
| Xa6Xh | All | Intentional streptokinase overdose             |
| Xa6Xl | All | Intentional urokinase overdose                 |
| Xa6Um | All | Intentional thyroxin overdose                  |
| Xa6Uz | All | Intentional heparin overdose                   |
| Xa6V3 | All | Intentional coumarin overdose                  |
| Xa6V7 | All | Intentional warfarin sodium overdose           |
| Xa6VD | All | Intentional ferrous sulphate overdose          |
| Xa6VI | All | Intentional iodide overdose                    |
| Xa6VN | All | Intentional vitamin A overdose                 |
| Xa6VR | All | Intentional vitamin D overdose                 |
| Xa6VV | All | Intentional vitamin K overdose                 |
| Xa6Va | All | Intentional nicotinic acid derivative overdose |
| Xa6Ve | All | Intentional folic acid overdose                |
| Xa6Vi | All | Intentional potassium overdose                 |
| Xa6Vo | All | Intentional clofibrate overdose                |
| Xa6Vu | All | Intentional disopyramide overdose              |
| Xa6Vy | All | Intentional quinidine overdose                 |
| Xa6W2 | All | Intentional procainamide overdose              |
| Xa6W7 | All | Intentional bretylium overdose                 |
| Xa6WC | All | Intentional amiodarone overdose                |
| Xa6WJ | All | Intentional bendroflumethiazide overdose       |
| Xa6WN | All | Intentional chlorothiazide overdose            |
| Xa6WS | All | Intentional furosemide overdose                |
| Xa6WW | All | Intentional bumetanide overdose                |
| Xa6Wa | All | Intentional etacrynic acid overdose            |

|       |     |                                                                                                                                             |
|-------|-----|---------------------------------------------------------------------------------------------------------------------------------------------|
| Xa6We | All | Intentional potassium sparing diuretic overdose                                                                                             |
| Xa6Wi | All | Intentional osmotic diuretic overdose                                                                                                       |
| Xa6Wn | All | Intentional mersalyl overdose                                                                                                               |
| Xa6Ws | All | Intentional acetazolamide overdose                                                                                                          |
| Xa6Wy | All | Intentional guanethidine overdose                                                                                                           |
| Xa6X2 | All | Intentional overdose by angiotensin-converting-enzyme inhibitors                                                                            |
| Xa6X5 | All | Intentional antihypertensive overdose                                                                                                       |
| Xa6XA | All | Intentional digoxin overdose                                                                                                                |
| Xa6XE | All | Intentional phosphodiesterase inhibitor overdose                                                                                            |
| Xa6XJ | All | Intentional ergot alkaloid overdose                                                                                                         |
| Xa6XO | All | Intentional diazoxide overdose                                                                                                              |
| Xa6XS | All | Intentional hydralazine overdose                                                                                                            |
| Xa6XW | All | Intentional dipyridamole overdose                                                                                                           |
| Xa6Xh | All | Intentional streptokinase overdose                                                                                                          |
| Xa6Xl | All | Intentional urokinase overdose                                                                                                              |
| Xa6Tl | All | Intentional insulin overdose                                                                                                                |
| Xa6TF | All | Intentional vaccine overdose                                                                                                                |
| Xa6TO | All | Intentional glucagon overdose                                                                                                               |
| Xa6Lq | All | Intentional nicotine overdose                                                                                                               |
| Xa6TJ | All | Intentional antisera overdose                                                                                                               |
| U204. | All | [X]Overdose - SSRI                                                                                                                          |
| U2040 | All | [X]Intentional self poisoning by and exposure to psychotropic drugs, occurrence at home                                                     |
| U2041 | All | [X]Intentional self poisoning by and exposure to psychotropic drugs, occurrence in residential institution                                  |
| U2042 | All | [X]Intentional self poisoning by and exposure to psychotropic drugs, occurrence at school, other institution and public administrative area |
| U2043 | All | [X]Intentional self poisoning by and exposure to psychotropic drugs, occurrence at sports and athletics area                                |
| U2044 | All | [X]Intentional self poisoning by and exposure to psychotropic drugs, occurrence on street and highway                                       |
| U2045 | All | [X]Intentional self poisoning by and exposure to psychotropic drugs, occurrence at trade and service area                                   |
| U2046 | All | [X]Intentional self poisoning by and exposure to psychotropic drugs, occurrence at industrial and construction area                         |
| U2047 | All | [X]Intentional self poisoning by and exposure to psychotropic drugs, occurrence on farm                                                     |
| U204y | All | [X]Intentional self poisoning by and exposure to psychotropic drugs, occurrence at other specified place                                    |
| U204z | All | [X]Intentional self poisoning by and exposure to psychotropic drugs, occurrence at unspecified place                                        |
| XaIPy | All | H/O: repeated overdose                                                                                                                      |
| U2020 | All | [X]Intentional self poisoning by and exposure to sedative hypnotics, occurrence at home                                                     |
| U2021 | All | [X]Intentional self poisoning by and exposure to sedative hypnotics, occurrence in residential institution                                  |

|       |     |                                                                                                                                             |
|-------|-----|---------------------------------------------------------------------------------------------------------------------------------------------|
| U2022 | All | [X]Intentional self poisoning by and exposure to sedative hypnotics, occurrence at school, other institution and public administrative area |
| U2023 | All | [X]Intentional self poisoning by and exposure to sedative hypnotics, occurrence at sports and athletics area                                |
| U2024 | All | [X]Intentional self poisoning by and exposure to sedative hypnotics, occurrence on street and highway                                       |
| U2025 | All | [X]Intentional self poisoning by and exposure to sedative hypnotics, occurrence at trade and service area                                   |
| U2026 | All | [X]Intentional self poisoning by and exposure to sedative hypnotics, occurrence at industrial and construction area                         |
| U2027 | All | [X]Intentional self poisoning by and exposure to sedative hypnotics, occurrence on farm                                                     |
| U202y | All | [X]Intentional self poisoning by and exposure to sedative hypnotics, occurrence at other specified place                                    |
| U202z | All | [X]Intentional self poisoning by and exposure to sedative hypnotics, occurrence at unspecified place                                        |
| Xa67B | All | Intentional 5-HT3-receptor antagonist overdose                                                                                              |
| Xa4kL | All | Intentional paracetamol poisoning                                                                                                           |
| Xa4kP | All | Intentional paracetamol and dextropropoxyphene poisoning                                                                                    |
| Xa4kV | All | Intentional aspirin poisoning                                                                                                               |
| Xa4kY | All | Intentional salicylic acid salt poisoning                                                                                                   |
| Xa4kb | All | Intentional pentazocine poisoning                                                                                                           |
| Xa4kf | All | Intentional phenazocine poisoning                                                                                                           |
| Xa4kk | All | Intentional dextromoramide poisoning                                                                                                        |
| Xa4ko | All | Intentional dextropropoxyphene poisoning                                                                                                    |
| Xa4ks | All | Intentional dipipanone poisoning                                                                                                            |
| Xa4kv | All | Intentional methadone poisoning                                                                                                             |
| Xa4l0 | All | Intentional buprenorphine poisoning                                                                                                         |
| Xa4l3 | All | Intentional poisoning by codeine                                                                                                            |
| Xa4l6 | All | Intentional heroin poisoning                                                                                                                |
| Xa4l9 | All | Intentional poisoning by dihydrocodeine                                                                                                     |
| Xa4lD | All | Intentional nalbuphine poisoning                                                                                                            |
| Xa4lG | All | Intentional morphine poisoning                                                                                                              |
| Xa4lM | All | Intentional alfentanil poisoning                                                                                                            |
| Xa4lQ | All | Intentional fentanyl poisoning                                                                                                              |
| Xa4lT | All | Intentional pethidine poisoning                                                                                                             |
| Xa4lX | All | Intentional phenoperidine poisoning                                                                                                         |
| Xa4lb | All | Intentional meptazinol poisoning                                                                                                            |
| Xa4lf | All | Intentional levorphanol poisoning                                                                                                           |
| Xa4li | All | Intentional narcotic poisoning                                                                                                              |
| Xa4lo | All | Intentional poisoning by combination analgesic                                                                                              |
| Xa4ls | All | Intentional acemetacin poisoning                                                                                                            |
| Xa4lw | All | Intentional azapropazone poisoning                                                                                                          |
| Xa4m0 | All | Intentional diclofenac poisoning                                                                                                            |
| Xa4m4 | All | Intentional etodolac poisoning                                                                                                              |
| Xa4m8 | All | Intentional felbinac poisoning                                                                                                              |

|       |     |                                                                 |
|-------|-----|-----------------------------------------------------------------|
| Xa4mC | All | Intentional fenbufen poisoning                                  |
| Xa4mG | All | Intentional fenoprofen poisoning                                |
| Xa4mK | All | Intentional flurbiprofen poisoning                              |
| Xa4mN | All | Intentional ibuprofen poisoning                                 |
| Xa4mQ | All | Intentional indometacin poisoning                               |
| Xa4mU | All | Intentional ketoprofen poisoning                                |
| Xa4mY | All | Intentional ketorolac poisoning                                 |
| Xa4mc | All | Intentional mefenamic acid poisoning                            |
| Xa4mg | All | Intentional nabumetone poisoning                                |
| Xa4mj | All | Intentional naproxen poisoning                                  |
| Xa4mn | All | Intentional nefopam poisoning                                   |
| Xa4mr | All | Intentional oxyphenbutazone poisoning                           |
| Xa4mu | All | Intentional phenylbutazone poisoning                            |
| Xa4my | All | Intentional piroxicam poisoning                                 |
| Xa4n2 | All | Intentional sulindac poisoning                                  |
| Xa4n6 | All | Intentional tenoxicam poisoning                                 |
| Xa4nA | All | Intentional tiaprofenic acid poisoning                          |
| Xa4nE | All | Intentional tolmetin poisoning                                  |
| Xa4nJ | All | Intentional radiopharmaceutical poisoning                       |
| Xa4nR | All | Intentional X-ray contrast media poisoning                      |
| Xa4nV | All | Intentional magnetic resonance imaging contrast media poisoning |
| Xa4nN | All | Intentional X-ray diagnostic contrast media poisoning           |
| Xa4nZ | All | Intentional allergen extract vaccine poisoning                  |
| Xa4nd | All | Intentional diagnostic dye poisoning                            |
| Xa53n | All | Intentional dextromethorphan poisoning                          |
| Xa53q | All | Intentional guaifenesin poisoning                               |
| Xa53t | All | Intentional terpin hydrate poisoning                            |
| Xa53w | All | Intentional poisoning by bronchodilator drug                    |
| Xa53z | All | Intentional aminophylline poisoning                             |
| Xa542 | All | Intentional theophylline poisoning                              |
| Xa545 | All | Intentional poisoning by herbal asthma mixture                  |
| Xa548 | All | Intentional anti-common cold drug poisoning                     |
| Xa54B | All | Intentional local antipruritic poisoning                        |
| Xa54E | All | Intentional local astringent and detergent poisoning            |
| Xa54H | All | Intentional hair treatment poisoning                            |
| Xa54L | All | Intentional allopurinol poisoning                               |
| Xa54O | All | Intentional colchicine poisoning                                |
| Xa54R | All | Intentional probenecid poisoning                                |
| Xa54X | All | Intentional gold salt poisoning                                 |
| Xa54a | All | Intentional antirheumatic poisoning                             |
| Xa54v | All | Intentional chelating agent poisoning                           |
| Xa54z | All | Intentional alternative medicine poisoning                      |
| Xa556 | All | Intentional flucytosine poisoning                               |
| Xa559 | All | Intentional griseofulvin poisoning                              |
| Xa55C | All | Intentional amphotericin B poisoning                            |

|       |     |                                                 |
|-------|-----|-------------------------------------------------|
| Xa55F | All | Intentional nystatin poisoning                  |
| Xa55I | All | Intentional trichomycin poisoning               |
| Xa55L | All | Intentional idoxuridine poisoning               |
| Xa55x | All | Intentional kanamycin poisoning                 |
| Xa560 | All | Intentional streptomycin poisoning              |
| Xa564 | All | Intentional gentamicin poisoning                |
| Xa568 | All | Intentional tobramycin poisoning                |
| Xa56C | All | Intentional netilmicin poisoning                |
| Xa56F | All | Intentional erythromycin poisoning              |
| Xa56J | All | Intentional azithromycin poisoning              |
| Xa56N | All | Intentional clarithromycin poisoning            |
| Xa56Q | All | Intentional oleandomycin poisoning              |
| Xa56T | All | Intentional spiramycin poisoning                |
| Xa56X | All | Intentional sodium fusidate poisoning           |
| Xa56b | All | Intentional spectinomycin poisoning             |
| Xa56f | All | Intentional vancomycin poisoning                |
| Xa56j | All | Intentional trimethoprim poisoning              |
| Xa56m | All | Intentional nitrofurantoin derivative poisoning |
| Xa56q | All | Intentional fusidic acid poisoning              |
| Xa56u | All | Intentional 4-quinolones poisoning              |
| Xa6QZ | All | Intentional 4-quinolones overdose               |
| Xa56x | All | Intentional ampicillin poisoning                |
| Xa570 | All | Intentional cloxacillin poisoning               |
| Xa573 | All | Intentional carbenicillin poisoning             |
| Xa576 | All | Intentional penicillin G poisoning              |
| Xa57A | All | Intentional flucloxacillin poisoning            |
| Xa57E | All | Intentional piperacillin poisoning              |
| Xa57J | All | Intentional cefadroxil poisoning                |
| Xa57M | All | Intentional cefalexin poisoning                 |
| Xa57P | All | Intentional cephalothin poisoning               |
| Xa57T | All | Intentional cefazolin poisoning                 |
| Xa57X | All | Intentional cefradine poisoning                 |
| Xa57b | All | Intentional latamoxef poisoning                 |
| Xa57k | All | Intentional cefuroxime poisoning                |
| Xa57g | All | Intentional cefaclor poisoning                  |
| Xa57o | All | Intentional cephalexin poisoning                |
| Xa57t | All | Intentional cefotaxime poisoning                |
| Xa57x | All | Intentional ceftazidime poisoning               |
| Xa581 | All | Intentional ceftizoxime poisoning               |
| Xa585 | All | Intentional cefixime poisoning                  |
| Xa589 | All | Intentional cefodizime poisoning                |
| Xa58D | All | Intentional cefpodoxime poisoning               |
| Xa58H | All | Intentional ceftriaxone poisoning               |
| Xa58L | All | Intentional ceftibuten poisoning                |
| Xa58P | All | Intentional cefsulodin poisoning                |

|       |     |                                                |
|-------|-----|------------------------------------------------|
| Xa58U | All | Intentional cefpirome poisoning                |
| Xa58X | All | Intentional cephaloridine poisoning            |
| Xa58a | All | Intentional sulfadiazine poisoning             |
| Xa58d | All | Intentional sulphafurazole poisoning           |
| Xa58g | All | Intentional sulfamethoxazole poisoning         |
| Xa58j | All | Intentional doxycycline poisoning              |
| Xa58m | All | Intentional minocycline poisoning              |
| Xa58p | All | Intentional oxytetracycline poisoning          |
| Xa58s | All | Intentional tetracycline poisoning             |
| Xa58v | All | Intentional chloramphenicol poisoning          |
| Xa58z | All | Intentional co-trimoxazole poisoning           |
| Xa59F | All | Intentional hydroxyquinoline poisoning         |
| Xa59I | All | Intentional diiodohydroxyquinoline poisoning   |
| Xa59L | All | Intentional rifampin poisoning                 |
| Xa59O | All | Intentional isoniazid poisoning                |
| Xa59R | All | Intentional ethambutol poisoning               |
| Xa59U | All | Intentional cycloserine poisoning              |
| Xa59Y | All | Intentional antileprotic drug poisoning        |
| Xa59b | All | Intentional ethionamide poisoning              |
| Xa59e | All | Intentional para-aminosalicylic acid poisoning |
| Xa59h | All | Intentional sulphone poisoning                 |
| Xa59l | All | Intentional pesticide product poisoning        |



**Supplementary table S2.10.** Read codes used to identify non-medication based treatments for depression or anxiety.

| <b>Counselling</b>    |                |                                            |
|-----------------------|----------------|--------------------------------------------|
| <b>Read V2 Code</b>   | <b>Term ID</b> | <b>Description</b>                         |
| 67...                 | 11             | Counselling/health education               |
| 671..                 | All            | Counselling - general                      |
| 6712.                 | All            | Counselling offered                        |
| 6714.                 | All            | Counselling carried out                    |
| 6715.                 | All            | Counselling by other agency                |
| 6716.                 | All            | Counselling of benefit                     |
| 6717.                 | All            | Counselling of no benefit                  |
| 671Z.                 | All            | Counselling - general NOS                  |
| 672..                 | All            | Person counselled                          |
| 6721.                 | All            | Patient counselled                         |
| 6722.                 | All            | Family counselled                          |
| 673..                 | All            | Person counselled by                       |
| 6731.                 | All            | Counselled by a doctor                     |
| 6732.                 | All            | Counselled by a nurse                      |
| 6733.                 | All            | Counselled by a health visitor             |
| 6735.                 | All            | Counselled by a social worker              |
| 6736.                 | All            | Counselled by a counsellor                 |
| 6737.                 | All            | Counselled by a vol. worker                |
| 673Z.                 | All            | Counselled by person NOS                   |
| 8M8..                 | All            | Counselling requested                      |
| 9NJ1.                 | All            | In-house counselling                       |
| 9NJR.                 | All            | In-house counselling first appointment     |
| 9NJT.                 | All            | In-house counselling follow-up appointment |
| <b>Read CTV3 Code</b> | <b>Term ID</b> | <b>Description</b>                         |
| X71Ec                 | All            | Counselling                                |
| X71Ep                 | All            | Coping strategy counselling                |
| XaEC1                 | All            | Phobia counselling                         |
| XaD27                 | All            | Family counselling                         |
| 6779.                 | All            | Psychological counselling                  |
| XaECG                 | All            | Anxiety counselling                        |
| XaECF                 | All            | Self-esteem counselling                    |
| XaI8j                 | All            | Stress counselling                         |
| 672..                 | All            | Person counselled                          |
| 6721.                 | All            | Patient counselled                         |
| 6722.                 | All            | Family counselled                          |
| XE1TI                 | All            | Person counselled by                       |
| 6715.                 | All            | Counselling by other agency                |
| 6731.                 | All            | Counselled by a doctor                     |

|                                      |                |                                                         |
|--------------------------------------|----------------|---------------------------------------------------------|
| 6732.                                | All            | Counselled by a nurse                                   |
| 6733.                                | All            | Counselled by a health visitor                          |
| 6735.                                | All            | Counselled by a social worker                           |
| 6736.                                | All            | Counselled by a counsellor                              |
| 6737.                                | All            | Counselled by voluntary worker                          |
| 673Z.                                | All            | Counselled by person NOS                                |
| Xa07L                                | All            | Counselled by member of primary health care team        |
| 9N2B.                                | All            | Seen by counsellor                                      |
| XaAS4                                | All            | Seen by mental health counsellor                        |
| XaBT1                                | All            | Refer to counsellor                                     |
| XaAfj                                | All            | Referral to mental health counsellor                    |
| 9NJ1.                                | All            | In-house counselling                                    |
| XaLnp                                | All            | In-house counselling first appointment                  |
| XaLnr                                | All            | In-house counselling follow-up appointment              |
| 671..                                | All            | Counselling - general                                   |
| 6712.                                | All            | Counselling offered                                     |
| 6714.                                | All            | Counselling carried out                                 |
| 6716.                                | All            | Counselling of benefit                                  |
| 6717.                                | All            | Counselling of no benefit                               |
| 671Z.                                | All            | Counselling - general NOS                               |
| XaA0d                                | All            | Under care of counsellor                                |
| XaA0h                                | All            | Under care of mental health counsellor                  |
| <b>Cognitive Behavioural Therapy</b> |                |                                                         |
| <b>Read V2 Code</b>                  | <b>Term ID</b> | <b>Description</b>                                      |
| 8G13.                                | All            | Cognitive-behaviour therapy                             |
| 8G130                                | All            | Cognitive behavioural therapy parenting programme       |
| 8G131                                | All            | CBTp - cognitive behavioural therapy for psychosis      |
| 7L1a.                                | All            | Cognitive behavioural therapy                           |
| 7L1a0                                | All            | Cognitive behavioural therapy by unidisciplinary team   |
| 7L1a1                                | All            | Cognitive behavioural therapy by multidisciplinary team |
| 7L1ay                                | All            | Other specified cognitive behavioural therapy           |
| 7L1az                                | All            | Cognitive behavioural therapy NOS                       |
| 8G510                                | All            | Group cognitive behavioural therapy                     |
| 8G15.                                | All            | Computerised cognitive behavioural therapy              |
| 8HIK.                                | All            | Referral for cognitive behavioural therapy              |
| <b>Read CTV3 Code</b>                | <b>Term ID</b> | <b>Description</b>                                      |
| Ub0qp                                | All            | Cognitive and behavioural therapy                       |
| XaABO                                | All            | Cognitive - behaviour therapy                           |
| Xad6J                                | All            | Cognitive behavioural therapy for psychosis             |
| Xaaa6                                | All            | Cognitive behavioural therapy parenting programme       |
| XaQC0                                | All            | Guided self help cognitive behavioural therapy          |
| XaKzQ                                | All            | Computerised cognitive behavioural therapy              |
| Xa8I9                                | All            | Generic cognitive behavioural therapy                   |

|                       |                |                                                                   |
|-----------------------|----------------|-------------------------------------------------------------------|
| XaM2I                 | All            | Cognitive behavioural therapy by unidisciplinary team             |
| XaM2J                 | All            | Cognitive behavioural therapy by multidisciplinary team           |
| XaM2K                 | All            | Other specified cognitive behavioural therapy                     |
| XaM2L                 | All            | Cognitive behavioural therapy NOS                                 |
| XaR2j                 | All            | Referral to cognitive behavioural therapist                       |
| XaR5D                 | All            | Referral for cognitive behavioural therapy                        |
| XaYgB                 | All            | Referral for high intensity cognitive behavioural therapy         |
| <b>Psychotherapy</b>  |                |                                                                   |
| <b>Read V2 Code</b>   | <b>Term ID</b> | <b>Description</b>                                                |
| 8G...                 | All            | Psychotherapy                                                     |
| 8G1..                 | All            | General psychotherapy                                             |
| 8G10.                 | All            | Psychotherapy - behavioural                                       |
| 8G100                 | All            | Behavioural activation therapy                                    |
| 8G101                 | All            | Dialectical behaviour therapy                                     |
| 8G102                 | All            | Behavioural parent training                                       |
| 8G11.                 | All            | Psychotherapy - cognitive                                         |
| 8G12.                 | All            | Psychotherapy - psychodynamic                                     |
| 8G120                 | All            | Short-term psychodynamic therapy                                  |
| 8G121                 | All            | Dynamic interpersonal therapy                                     |
| 8G122                 | All            | Focal psychodynamic therapy                                       |
| 8G14.                 | All            | Cognitive analytic therapy                                        |
| 8G15.                 | All            | Computerised cognitive behavioural therapy                        |
| 8G16.                 | All            | Interpersonal psychotherapy                                       |
| 8G18.                 | All            | Cognitive stimulation therapy                                     |
| 9NIK.                 | All            | Seen by psychotherapist                                           |
| 9NIK0                 | All            | Seen by trainee psychotherapist                                   |
| 8HHT.                 | All            | Referral to psychotherapist                                       |
| ZV57D                 | All            | [V]Psychotherapy, not elsewhere classified                        |
| ZV673                 | All            | [V]Psychotherapy or other treatment for mental disorder follow-up |
| 8G9Z.                 | All            | Other psychotherapy NOS                                           |
| 8G9..                 | All            | Other psychotherapy                                               |
| <b>Read CTV3 Code</b> | <b>Term ID</b> | <b>Description</b>                                                |
| X71bp                 | All            | Psychotherapy                                                     |
| XaaUO                 | All            | Cognitive rehabilitation therapy                                  |
| XaItc                 | All            | Brief solution focused psychotherapy                              |
| Xa8IG                 | All            | Psychoanalytic and psychodynamic therapy                          |
| Xa8IJ                 | All            | Long-term exploratory psychotherapy                               |
| 3841.                 | All            | Psychoanalysis                                                    |
| XaA8V                 | All            | Generic psychoanalysis                                            |
| XaA8W                 | All            | Independent psychoanalysis                                        |
| XaA8T                 | All            | Kleinian psychoanalysis                                           |
| XaA8U                 | All            | Bion-based group psychoanalysis                                   |
| XaA8X                 | All            | Classical psychoanalysis                                          |

|       |     |                                                   |
|-------|-----|---------------------------------------------------|
| XaA8Y | All | Lacanian psychoanalysis                           |
| XaA8g | All | Group psychoanalysis                              |
| XaA8U | All | Bion-based group psychoanalysis                   |
| 384Z. | All | Psychological analysis NOS                        |
| Xa8IM | All | Jungian-based therapy                             |
| Xa8IN | All | Generic Jungian-based therapy                     |
| Xa8IP | All | Analytical psychology                             |
| Xa8IR | All | Long-term psychodynamic psychotherapy             |
| XaA8Z | All | Developmental psychodynamic psychotherapy         |
| XaA8c | All | Supportive expressive psychodynamic psychotherapy |
| XaA8d | All | Psychodynamic-interpersonal psychotherapy         |
| XaEVq | All | Psychodynamic psychotherapy                       |
| Xad7C | All | Focal psychodynamic therapy                       |
| Xa8IR | All | Long-term psychodynamic psychotherapy             |
| XaA8Z | All | Developmental psychodynamic psychotherapy         |
| XaA8c | All | Supportive expressive psychodynamic psychotherapy |
| XaA8d | All | Psychodynamic-interpersonal psychotherapy         |
| Xa8II | All | Short-term psychodynamic therapy                  |
| XaXuc | All | Dynamic interpersonal therapy                     |
| XaA9g | All | Specific task orientated psychotherapy            |
| XE0iL | All | Psychotherapy/sociotherapy                        |
| 8G9Z. | All | Other psychotherapy NOS                           |
| 8G9.. | All | Other psychotherapy                               |

## Codes used to identify time off work and unemployment

**Supplementary table S3.1.** Read codes used to identify unemployment.

| <b>Unemployment</b>   |                |                                                                       |
|-----------------------|----------------|-----------------------------------------------------------------------|
| <b>Read V2 Code</b>   | <b>Term ID</b> | <b>Description</b>                                                    |
| 13J7.                 | All            | Unemployed                                                            |
| 13J70                 | All            | Recently unemployed                                                   |
| 13J71                 | All            | Chronic unemployment                                                  |
| ZV620                 | All            | [V]Unemployment                                                       |
| 13R..                 | All            | Unemployment benefits                                                 |
| 13R1.                 | All            | Unemployment benefits                                                 |
| 13R2.                 | All            | Redundancy payment                                                    |
| 13RZ.                 | All            | Unemployment benefit NOS                                              |
| 13JX.                 | All            | Time off work                                                         |
| 13JG.                 | All            | Voluntarily redundant                                                 |
| 13J3.                 | All            | Loss of job                                                           |
| 13J30                 | All            | Sacked from work                                                      |
| 13J8.                 | All            | Redundant                                                             |
| 13JJ.                 | All            | Unfit for work                                                        |
| 13JJ0                 | All            | Benefit agency reports unfit for work                                 |
| 13JJ1                 | All            | Benefit agency reports unfit for work but fit note no longer required |
| 13Jk.                 | All            | Not in employment, education or training                              |
| 9DG4.                 | All            | IB 113 DLS incapacity for work form paid                              |
| 9DG2.                 | All            | IB 113 DLS incapacity for work form sent                              |
| 9DG3.                 | All            | IB 113 DLS incapacity for work form received                          |
| 9DG1.                 | All            | IB 113 DLS incapacity for work form completed                         |
| 9DQ3.                 | All            | ESA113 form paid                                                      |
| 9DQ1.                 | All            | ESA113 form sent                                                      |
| 9DQ2.                 | All            | ESA113 form received                                                  |
| 9DQ0.                 | All            | ESA113 form completed                                                 |
| 130D.                 | All            | Employment and support allowance                                      |
| <b>Read CTV3 Code</b> | <b>Term ID</b> | <b>Description</b>                                                    |
| 13J7.                 | All            | Unemployed                                                            |
| 13J70                 | All            | Recently unemployed                                                   |
| 13J71                 | All            | Chronic unemployment                                                  |
| ZV620                 | All            | [V]Unemployment                                                       |
| XaPhf                 | All            | Benefit agency reports unfit for work                                 |
| Xabd4                 | All            | Benefit agency reports unfit for work but fit note no longer required |
| 13J8.                 | All            | Redundant                                                             |
| 13JG.                 | All            | Voluntarily redundant                                                 |

|       |     |                                               |
|-------|-----|-----------------------------------------------|
| Ua2BD | All | Unfit to return to work                       |
| Ua2BE | All | Physically unfit for work                     |
| U12BF | All | Mentally unfit for work                       |
| 13JX. | All | Time off work                                 |
| XaZHu | All | ESA113 form paid                              |
| XaZHt | All | ESA113 form sent                              |
| XaZHs | All | ESA113 form received                          |
| XaZHj | All | ESA113 form completed                         |
| XaBhC | All | Employment and support allowance              |
| XacJr | All | Not in employment, education or training      |
| XE0pT | All | Loss of job                                   |
| Ua0V9 | All | Dismissed from job                            |
| Ua0VA | All | Unfair dismissal from job                     |
| XaCIW | All | IB 113 DLS incapacity for work form paid      |
| XaCIU | All | IB 113 DLS incapacity for work form sent      |
| XaCIV | All | IB 113 DLS incapacity for work form received  |
| XaCIT | All | IB 113 DLS incapacity for work form completed |
| 13JJ. | All | Unfit for work                                |
| 13J6. | All | Medically retired                             |

**Supplementary table S3.2.** Read codes used to identify time off work via the issuing of Med 3 (“fit notes”) certificates.

| <b>Unemployment</b>   |                |                                                      |
|-----------------------|----------------|------------------------------------------------------|
| <b>Read V2 Code</b>   | <b>Term ID</b> | <b>Description</b>                                   |
| 9D1..                 | All            | MED3 - doctor's statement                            |
| 9D11.                 | All            | MED3 issued to patient                               |
| 9D12.                 | All            | MED3 duplicate issued                                |
| 9D15.                 | All            | eMED3 (2010) new statement issued, not fit for work  |
| 9D17.                 | All            | eMED3 (2010) duplicate issued, not fit for work      |
| 9D19.                 | All            | MED3 (2010) issued by hand, not fit for work         |
| 9D1C.                 | All            | MED3 (2010) issued to patient                        |
| 9D1D.                 | All            | MED3 (2010) duplicate issued                         |
| 9D1E.                 | All            | MED3 (2010) issued - recommend phased return to work |
| 9D1F.                 | All            | MED3 (2010) issued - recommend altered hours         |
| 9D1G.                 | All            | MED3 (2010) issued - recommend amended duties        |
| 9D1Z.                 | All            | MED3 - NOS                                           |
| <b>Read CTV3 Code</b> | <b>Term ID</b> | <b>Description</b>                                   |
| XaBHd                 | All            | MED3 status                                          |
| XaXf2                 | All            | MED3 (2010) duplicate issued                         |
| XaXf1                 | All            | MED3 (2010) issued to patient                        |
| XaXf5                 | All            | MED3 (2010) issued - recommend amended duties        |
| XaXf4                 | All            | MED3 (2010) issued - recommend altered hours         |
| XaXf3                 | All            | MED3 (2010) issued - recommend phased return to work |
| 9D11.                 | All            | MED3 issued to patient                               |
| XaX1R                 | All            | MED3 (2010) issued by hand, not fit for work         |
| XaX1L                 | All            | eMED3 (2010) duplicate issued, not fit for work      |
| XaX1E                 | All            | eMED3 (2010) new statement issued, not fit for work  |
| 9D12.                 | All            | MED3 duplicate issued                                |
| 9D1Z.                 | All            | MED3 - NOS                                           |

## Definitions of atopic and autoimmune conditions with Read code lists.

**Supplementary table S4.1.** The case definitions for included atopic and autoimmune conditions.

| Condition                          | Definition                                                                                                                                                                                                                                |
|------------------------------------|-------------------------------------------------------------------------------------------------------------------------------------------------------------------------------------------------------------------------------------------|
| <b>Atopic conditions</b>           |                                                                                                                                                                                                                                           |
| Atopic dermatitis                  | Defined using the validated algorithm by Abuabara et al. (2017)(1)                                                                                                                                                                        |
| Allergic rhinitis                  | A diagnosis code for allergic rhinitis (Supplementary table S4.2)                                                                                                                                                                         |
| Asthma                             | Defined using the RCGP RSC asthma algorithm(2)                                                                                                                                                                                            |
| <b>Gastrointestinal conditions</b> |                                                                                                                                                                                                                                           |
| Crohn's disease                    | A diagnosis code for Crohn's and no conflicting code for ulcerative colitis (where conflicted codes occur the most recent diagnosis code is used to define the condition) (Supplementary table S4.3)                                      |
| Ulcerative colitis                 | A diagnosis code for ulcerative colitis and no conflicting code for Crohn's disease (where conflicted codes occur the most recent diagnosis code is used to define the condition) (Supplementary table S4.4)                              |
| Coeliac disease                    | A diagnosis code for Coeliac disease (Supplementary table S4.5)                                                                                                                                                                           |
| Pernicious anaemia                 | A diagnosis code for pernicious anaemia (Supplementary table S4.6)                                                                                                                                                                        |
| <b>Endocrine conditions</b>        |                                                                                                                                                                                                                                           |
| Type 1 diabetes                    | Defined using the RCGP RSC diabetes type algorithm(3)                                                                                                                                                                                     |
| Hashimoto's thyroiditis            | Either: <ul style="list-style-type: none"> <li>• A code for Hashimoto's thyroiditis (Supplementary table S4.7)</li> <li>OR</li> <li>• A code for "non-specific hypothyroidism" AND no code for "non-autoimmune hypothyroidism"</li> </ul> |
| Grave's disease                    | A diagnosis code for Grave's disease (Supplementary table S4.8)                                                                                                                                                                           |
| <b>Rheumatological conditions</b>  |                                                                                                                                                                                                                                           |
| Rheumatoid arthritis               | Defined using the validated algorithm by Muller et al. (2015)(4)                                                                                                                                                                          |
| Psoriatic arthritis                | A diagnosis code for psoriatic arthritis (Supplementary table S4.9)                                                                                                                                                                       |
| Ankylosing spondylitis             | A diagnosis code for ankylosing spondylitis (Supplementary table S4.10)                                                                                                                                                                   |
| Systemic lupus erythematosus       | A diagnosis code for systemic lupus erythematosus (Supplementary table S4.11)                                                                                                                                                             |
| Polymyalgia rheumatica             | A diagnosis code for polymyalgia rheumatica (Supplementary table S4.12)                                                                                                                                                                   |
| Sjögren's syndrome                 | A diagnosis code for Sjögren's syndrome (Supplementary table S4.13)                                                                                                                                                                       |
| <b>Dermatological conditions</b>   |                                                                                                                                                                                                                                           |
| Psoriasis                          | A diagnosis code for psoriasis (Supplementary table S4.14)                                                                                                                                                                                |
| Vitiligo                           | A diagnosis code for vitiligo (Supplementary table S4.15)                                                                                                                                                                                 |



| <b>Neurological conditions</b> |                                                                     |
|--------------------------------|---------------------------------------------------------------------|
| Multiple sclerosis             | A diagnosis code for multiple sclerosis (Supplementary table S4.16) |

**Supplementary table S4.2.** Read codes used to identify allergic rhinitis.

| <b>Allergic rhinitis</b> |                |                                                     |
|--------------------------|----------------|-----------------------------------------------------|
| <b>Read V2 Code</b>      | <b>Term ID</b> | <b>Description</b>                                  |
| H17..                    | All            | Allergic rhinitis                                   |
| H170.                    | All            | Allergic rhinitis due to pollens                    |
| H171.                    | All            | Allergic rhinitis due to other allergens            |
| H1710                    | All            | Allergy to animal                                   |
| H1711                    | All            | Dog allergy                                         |
| H172.                    | All            | Allergic rhinitis due to unspecified allergen       |
| H17z.                    | All            | Allergic rhinitis NOS                               |
| 14B1.                    | All            | H/O: hay fever                                      |
| H3300                    | All            | Hay fever with asthma                               |
| <b>Read CTV3 Code</b>    | <b>Term ID</b> | <b>Description</b>                                  |
| XE0Y5                    | All            | Allergic rhinitis                                   |
| Xa0IX                    | All            | Seasonal allergic rhinitis                          |
| XE2QI                    | All            | Allergic rhinitis due to pollens                    |
| Hyu20                    | All            | [X]Other seasonal allergic rhinitis                 |
| X00I8                    | All            | Hay fever - other allergen                          |
| X00I9                    | All            | Hay fever - unspecified allergen                    |
| X1020                    | All            | Hay fever with asthma                               |
| X00IA                    | All            | Perennial allergic rhinitis                         |
| X00IB                    | All            | Perennial allergic rhinitis with seasonal variation |
| H17z.                    | All            | Allergic rhinitis NOS                               |
| Hyu21                    | All            | [X]Other allergic rhinitis                          |
| XE0Y6                    | All            | Allergic rhinitis due to other allergens            |
| XE0Y7                    | All            | Allergic rhinitis due to unspecified allergen       |
| 14B1.                    | All            | H/O: hay fever                                      |

**Supplementary table S4.3.** Read codes used to Crohn's disease.

| <b>Crohn's disease</b> |                |                                                    |
|------------------------|----------------|----------------------------------------------------|
| <b>Read V2 Code</b>    | <b>Term ID</b> | <b>Description</b>                                 |
| J40..                  | All            | Regional enteritis- Crohn's disease                |
| J400.                  | All            | Regional enteritis of the small bowel              |
| J4000                  | All            | Regional enteritis of the duodenum                 |
| J4001                  | All            | Regional enteritis of the jejunum                  |
| J4002                  | All            | Crohn's disease of the terminal ileum              |
| J4003                  | All            | Crohn's disease of the ileum unspecified           |
| J4004                  | All            | Crohn's disease of the ileum NOS                   |
| J4005                  | All            | Exacerbation of Crohn's disease of small intestine |
| J400z                  | All            | Crohn's disease of the small bowel NOS             |
| J40..                  | All            | Crohn's disease                                    |
| J4010                  | All            | Regional enteritis of the colon                    |
| J4011                  | All            | Regional enteritis of the rectum                   |
| J4012                  | All            | Exacerbation of Crohn's disease of large intestine |
| J401z                  | All            | Crohn's disease of the large bowel NOS             |
| J40z.                  | All            | Crohn's disease NOS                                |
| <b>Read CTV3 Code</b>  | <b>Term ID</b> | <b>Description</b>                                 |
| XE2QL                  | All            | Crohn's disease                                    |
| Xa0lh                  | All            | Regional enteritis                                 |
| X302r                  | All            | Crohn's jejunitis                                  |
| X302t                  | All            | Crohn's ileitis                                    |
| J4003                  | All            | Crohn's disease of the ileum unspecified           |
| J4004                  | All            | Crohn's disease of the ileum NOS                   |
| J4002                  | All            | Crohn's disease of terminal ileum                  |
| J400.                  | All            | Regional enteritis of small bowel                  |
| XaK6C                  | All            | Exacerbation of Crohn's disease of small intestine |
| J400z                  | All            | Crohn's disease of the small bowel NOS             |
| J401.                  | All            | Regional enteritis of the large bowel              |
| XE0af                  | All            | Crohn's disease of the large bowel NOS             |
| XaK6D                  | All            | Exacerbation of Crohn's disease of large intestine |
| J40z.                  | All            | Regional enteritis NOS                             |
| J4010                  | All            | Crohn's colitis                                    |
| J4011                  | All            | Crohn's proctitis                                  |
| X3050                  | All            | Perianal Crohn's disease                           |
| Jyu40                  | All            | [X]Other Crohn's disease                           |
| J4001                  | Y30Fy          | Regional enteritis of the jejunum                  |

**Supplementary table S4.4.** Read codes used to identify Ulcerative colitis.

| <b>Ulcerative colitis</b> |                |                                          |
|---------------------------|----------------|------------------------------------------|
| <b>Read V2 Code</b>       | <b>Term ID</b> | <b>Description</b>                       |
| J41..                     | All            | Ulcerative colitis and/or proctitis      |
| J410.                     | All            | Ulcerative proctocolitis                 |
| J4100                     | All            | Ulcerative ileocolitis                   |
| J4101                     | All            | Ulcerative colitis                       |
| J4102                     | All            | Ulcerative rectosigmoiditis              |
| J4103                     | All            | Ulcerative proctitis                     |
| J4104                     | All            | Exacerbation of ulcerative colitis       |
| J410z                     | All            | Ulcerative proctocolitis NOS             |
| J411.                     | All            | Ulcerative (chronic) enterocolitis       |
| J412.                     | All            | Ulcerative (chronic) ileocolitis         |
| J413.                     | All            | Ulcerative pancolitis                    |
| N0454                     | All            | Juvenile arthritis in ulcerative colitis |
| N0310                     | All            | Arthropathy in ulcerative colitis        |
| <b>Read CTV3 Code</b>     | <b>Term ID</b> | <b>Description</b>                       |
| XE0ag                     | All            | Ulcerative colitis                       |
| XaZ2j                     | All            | Left sided ulcerative colitis            |
| XaYzX                     | All            | Ulcerative pancolitis                    |
| XaK6E                     | All            | Exacerbation of ulcerative colitis       |
| J410.                     | All            | Ulcerative proctocolitis                 |
| J4100                     | All            | Ulcerative ileocolitis                   |
| J410z                     | All            | Ulcerative proctocolitis NOS             |
| Jyu41                     | All            | [X]Other ulcerative colitis              |
| J4103                     | Y30D7          | Ulcerative proctitis                     |

**Supplementary table S4.5.** Read codes used to identify Coeliac disease.

| <b>Coeliac disease</b>    |                |                                               |
|---------------------------|----------------|-----------------------------------------------|
| <b>Read V2 Code</b>       | <b>Term ID</b> | <b>Description</b>                            |
| J690.                     | All            | Coeliac disease                               |
| J6900                     | All            | Congenital coeliac disease                    |
| J6901                     | All            | Acquired coeliac disease                      |
| J690z                     | All            | Coeliac disease NOS                           |
| 6648.                     | All            | Coeliac disease monitoring                    |
| 66480                     | All            | Coeliac disease annual review                 |
| 68W4.                     | All            | Coeliac disease autoantibody profile positive |
| <b>Read CTV3 Code</b>     | <b>Term ID</b> | <b>Description</b>                            |
| XE0bL                     | All            | Childhood coeliac disease                     |
| X3037                     | All            | Adult coeliac disease                         |
| J6901                     | All            | Acquired coeliac disease                      |
| J690z                     | All            | Coeliac disease NOS                           |
| XE0bK                     | All            | Coeliac disease                               |
| XaQIX                     | All            | Coeliac disease autoantibody profile positive |
| XaXGl                     | All            | Coeliac disease monitoring                    |
| J6900                     | All            | Congenital coeliac disease                    |
| <b>Pernicious anaemia</b> |                |                                               |
| <b>Read V2 Code</b>       | <b>Term ID</b> | <b>Description</b>                            |
| D010.                     | All            | Pernicious anaemia                            |
| F3815                     | All            | Myasthenic syndrome due to pernicious anaemia |
| <b>Read CTV3 Code</b>     | <b>Term ID</b> | <b>Description</b>                            |
| XE2ro                     | All            | Pernicious anaemia                            |
| X20CE                     | All            | Selective malabsorption of cyanocobalamin     |
| X20CC                     | All            | Congenital deficiency of intrinsic factor     |
| X20CD                     | All            | Biermer's congenital pernicious anaemia       |
| F3815                     | All            | Myasthenic syndrome due to pernicious anaemia |

**Supplementary table S4.6.** Read codes used to identify pernicious anaemia.

| <b>Pernicious anaemia</b> |                |                                               |
|---------------------------|----------------|-----------------------------------------------|
| <b>Read V2 Code</b>       | <b>Term ID</b> | <b>Description</b>                            |
| D010.                     | All            | Pernicious anaemia                            |
| F3815                     | All            | Myasthenic syndrome due to pernicious anaemia |
| <b>Read CTV3 Code</b>     | <b>Term ID</b> | <b>Description</b>                            |
| XE2ro                     | All            | Pernicious anaemia                            |
| X20CE                     | All            | Selective malabsorption of cyanocobalamin     |
| X20CC                     | All            | Congenital deficiency of intrinsic factor     |
| X20CD                     | All            | Biermer's congenital pernicious anaemia       |
| F3815                     | All            | Myasthenic syndrome due to pernicious anaemia |

**Supplementary table S4.7.** Read codes used to identify Hashimoto's thyroiditis. This will be defined as either a code for Hashimoto's thyroiditis or a non-specific code for hypothyroidism and no codes for any non-autoimmune hypothyroidism.

| <b>Hashimoto's thyroiditis</b>     |                |                                                      |
|------------------------------------|----------------|------------------------------------------------------|
| <b>Read V2 Code</b>                | <b>Term ID</b> | <b>Description</b>                                   |
| C052.                              | All            | Hashimoto's disease                                  |
| C05y4                              | All            | Chronic thyroiditis with transient thyrotoxicosis    |
| C046.                              | All            | Autoimmune myxoedema                                 |
| L1815                              | All            | Postpartum thyroiditis                               |
| <b>Read CTV3 Code</b>              | <b>Term ID</b> | <b>Description</b>                                   |
| X40GI                              | All            | Thyrotoxicosis due to Hashimoto's thyroiditis        |
| X40Gm                              | All            | Hashitoxicosis - transient                           |
| X40Ha                              | All            | Struma lymphomatosis                                 |
| X40HE                              | All            | Autoimmune hypothyroidism                            |
| X40HF                              | All            | Hypothyroidism due to Hashimoto's thyroiditis        |
| X40HG                              | All            | Hypothyroidism due to TSH receptor blocking antibody |
| X40HW                              | All            | Hashimoto's disease                                  |
| X40HY                              | All            | Lymphadenoid goitre                                  |
| X40HZ                              | All            | Lymphocytic thyroiditis - autoimmune                 |
| XE10C                              | All            | Autoimmune thyroiditis                               |
| X40HW                              | All            | Hashimoto's thyroiditis                              |
| X40Gm                              | All            | Hashitoxicosis - transient                           |
| X40HY                              | All            | Lymphadenoid goitre                                  |
| X40HZ                              | All            | Lymphocytic thyroiditis - autoimmune                 |
| X40Ha                              | All            | Struma lymphomatosis                                 |
| X40Dj                              | All            | Postpartum thyroiditis                               |
| <b>Non-specific hypothyroidism</b> |                |                                                      |
| <b>Read V2 Code</b>                | <b>Term ID</b> | <b>Description</b>                                   |
| C04..                              | All            | Acquired hypothyroidism                              |
| C045.                              | All            | Acquired atrophy of thyroid                          |
| C046.                              | All            | Autoimmune myxoedema                                 |
| C04y.                              | All            | Other acquired hypothyroidism                        |
| C04z.                              | All            | Hypothyroidism NOS                                   |
| C04z0                              | All            | Premature puberty due to hypothyroidism              |
| C04z1                              | All            | Myxoedema coma                                       |
| C05y.                              | All            | Other and unspecified chronic thyroiditis            |
| F3953                              | All            | Myopathy due to myxoedema                            |
| F1441                              | All            | Cerebellar ataxia due to myxoedema                   |
| F11x5                              | All            | Cerebral degeneration due to myxoedema               |
| 1432                               | All            | H/O: hypothyroidism                                  |
| 66BB.                              | All            | Hypothyroidism annual review                         |

|                                      |                |                                                           |
|--------------------------------------|----------------|-----------------------------------------------------------|
| 90j..                                | All            | Hypothyroidism monitoring administration                  |
| 90j0.                                | All            | Hypothyroidism monitoring first letter                    |
| 90j1.                                | All            | Hypothyroidism monitoring second letter                   |
| 90j2.                                | All            | Hypothyroidism monitoring third letter                    |
| 90j3.                                | All            | Hypothyroidism monitoring verbal invite                   |
| 90j4.                                | All            | Hypothyroidism monitoring telephone invitation            |
| F3814                                | All            | Myasthenic syndrome due to hypothyroidism                 |
| 90j4.                                | All            | Hypothyroidism monitoring telephone invitation            |
| <b>Read CTV3 Code</b>                | <b>Term ID</b> | <b>Description</b>                                        |
| X40IQ                                | All            | Hypothyroid                                               |
| XE108                                | All            | Acquired hypothyroidism                                   |
| X40HI                                | All            | Compensated hypothyroidism                                |
| X005I                                | All            | Myxoedema coma                                            |
| C04y.                                | All            | Other acquired hypothyroidism                             |
| X40HD                                | All            | Hypothyroid goitre, acquired                              |
| XE10A                                | All            | Hypothyroidism NOS                                        |
| Xa3ed                                | All            | Acquired hypothyroidism NOS                               |
| XaLUg                                | All            | Hypothyroidism review                                     |
| XaOjl                                | All            | Hypothyroidism annual review                              |
| X40HD                                | All            | Hypothyroid goitre, acquired                              |
| XaJul                                | All            | Hypothyroidism monitoring invitation                      |
| XaMFm                                | All            | Hypothyroidism monitoring telephone invitation            |
| XaKbz                                | All            | Hypothyroidism monitoring verbal invite                   |
| XaJuO                                | All            | Hypothyroidism monitoring third letter                    |
| XaJuN                                | All            | Hypothyroidism monitoring second letter                   |
| XaJuM                                | All            | Hypothyroidism monitoring first letter                    |
| C06y1                                | All            | Thyroid atrophy                                           |
| X40I1                                | All            | Atrophy of thyroid - acquired                             |
| F3953                                | All            | Myxoedema myopathy                                        |
| F11x5                                | All            | Myxoedema encephalopathy                                  |
| F1441                                | All            | Myxoedema cerebellar degeneration                         |
| PK251                                | All            | Aplasia of thyroid with myxoedema                         |
| X00Ao                                | All            | Myxoedema neuropathy                                      |
| 1432.                                | All            | H/O: hypothyroidism                                       |
| C04z0                                | All            | Premature puberty due to hypothyroidism                   |
| C05y.                                | All            | Other and unspecified chronic thyroiditis                 |
| <b>Non-autoimmune hypothyroidism</b> |                |                                                           |
| <b>Read V2 Code</b>                  | <b>Term ID</b> | <b>Description</b>                                        |
| C0A..                                | All            | Congenital iodine deficiency syndrome                     |
| C0A0.                                | All            | Congenital iodine-deficiency syndrome, neurological type  |
| C0A1.                                | All            | Congenital iodine-deficiency syndrome, myxoedematous type |
| C0A2.                                | All            | Congenital iodine-deficiency syndrome, mixed type         |
| C0A3.                                | All            | Iodine-deficiency-related diffuse (endemic) goitre        |



|                       |                |                                                            |
|-----------------------|----------------|------------------------------------------------------------|
| C0A4.                 | All            | Iodine-deficiency-related multinodular (endemic) goitre    |
| C0A5.                 | All            | Subclinical iodine-deficiency hypothyroidism               |
| C0AX.                 | All            | Iodine-deficiency-related (endemic) goitre, unspecified    |
| C03..                 | All            | Congenital hypothyroidism                                  |
| C030.                 | All            | Pendred's syndrome                                         |
| C031.                 | All            | Goitrous cretin                                            |
| C03y.                 | All            | Other specified congenital hypothyroidism                  |
| C03y0                 | All            | Congenital hypothyroidism with diffuse goitre              |
| C03y1                 | All            | Congenital hypothyroidism without goitre                   |
| C03z.                 | All            | Congenital hypothyroidism NOS                              |
| C040.                 | All            | Postsurgical hypothyroidism                                |
| C041.                 | All            | Other postablative hypothyroidism                          |
| C0410                 | All            | Irradiation hypothyroidism                                 |
| C041z                 | All            | Postablative hypothyroidism NOS                            |
| C042.                 | All            | Iodine hypothyroidism                                      |
| C043.                 | All            | Other iatrogenic hypothyroidism                            |
| C0430                 | All            | Hypothyroidism resulting from para-aminosalicylic acid     |
| C0431                 | All            | Hypothyroidism resulting from phenylbutazone               |
| C0432                 | All            | Hypothyroidism resulting from resorcinol                   |
| C043z                 | All            | Iatrogenic hypothyroidism NOS                              |
| C044.                 | All            | Postinfectious hypothyroidism                              |
| 71100                 | All            | Total thyroidectomy                                        |
| 71101                 | All            | Subtotal thyroidectomy                                     |
| 5A11.                 | All            | Thyroid gland ablat - irradiat                             |
| 5A12.                 | All            | Thyroid tumour/metast irradiat                             |
| C1343                 | All            | TSH - thyroid-stimulating hormone deficiency               |
| Q4337                 | All            | Neonatal jaunduce with congenital hypothyroidism           |
| <b>Read CTV3 Code</b> | <b>Term ID</b> | <b>Description</b>                                         |
| C03..                 | All            | Congenital hypothyroidism                                  |
| Xa017                 | All            | Congenital hypothyroidism with diffuse goitre              |
| X40H8                 | All            | Congenital hypothyroidism without goitre                   |
| PK251                 | All            | Congenital thyroid aplasia                                 |
| X40HA                 | All            | Congenital thyroid hypoplasia                              |
| X40HB                 | All            | Congenital atrophy of thyroid                              |
| X40HC                 | All            | Congenital hypothyroidism with ectopic thyroid             |
| C03y.                 | All            | Other specified congenital hypothyroidism                  |
| XE107                 | All            | Congenital hypothyroidism NOS                              |
| X40I7                 | All            | Congenital iodine deficiency hypothyroidism                |
| X40I8                 | All            | Congenital iodine deficiency syndrome - myxoedematous type |
| X40I9                 | All            | Congenital iodine deficiency syndrome - mixed type         |
| X40HL                 | All            | Iatrogenic hypothyroidism                                  |
| X40HM                 | All            | Postablative hypothyroidism                                |
| XE109                 | All            | Post-surgical hypothyroidism                               |
| C0410                 | All            | Irradiation hypothyroidism                                 |

|       |     |                                                            |
|-------|-----|------------------------------------------------------------|
| X40HN | All | Radioactive iodine-induced hypothyroidism                  |
| C041. | All | Other postablative hypothyroidism                          |
| C041z | All | Postablative hypothyroidism NOS                            |
| C043. | All | Other iatrogenic hypothyroidism                            |
| C043z | All | Iatrogenic hypothyroidism NOS                              |
| X40HO | All | Drug-induced hypothyroidism                                |
| C0430 | All | Hypothyroidism resulting from para-aminosalicylic acid     |
| C0431 | All | Hypothyroidism resulting from phenylbutazone               |
| C0432 | All | Hypothyroidism resulting from resorcinol                   |
| X40HP | All | Post-infectious hypothyroidism                             |
| X40IB | All | Subclinical iodine deficiency hypothyroidism               |
| C042. | All | Iodine hypothyroidism                                      |
| C1343 | All | TSH deficiency                                             |
| X40LB | All | Isolated TSH deficiency                                    |
| X40LC | All | Idiopathic TSH deficiency                                  |
| X40Hv | All | Hypothyroidism due to iodide trapping defect               |
| X40Hw | All | Hypothyroidism due to iodide organification defect         |
| X40Hx | All | Hypothyroidism due to coupling defect                      |
| X40Hy | All | Hypothyroidism due to deiodase defect                      |
| X40Hz | All | Hypothyroidism due to thyroglobulin synthesis defect       |
| Cyu11 | All | [X]Other specified hypothyroidism                          |
| Xa3ec | All | Hypothyroidism - congenital and acquired                   |
| C03.. | All | Congenital hypothyroidism                                  |
| Xa0l7 | All | Congenital hypothyroidism with diffuse goitre              |
| X40H8 | All | Congenital hypothyroidism without goitre                   |
| PK251 | All | Congenital thyroid aplasia                                 |
| X40HA | All | Congenital thyroid hypoplasia                              |
| X40HB | All | Congenital atrophy of thyroid                              |
| X40HC | All | Congenital hypothyroidism with ectopic thyroid             |
| C03y. | All | Other specified congenital hypothyroidism                  |
| XE107 | All | Congenital hypothyroidism NOS                              |
| X40l7 | All | Congenital iodine deficiency hypothyroidism                |
| X40l8 | All | Congenital iodine deficiency syndrome - myxoedematous type |
| X40l9 | All | Congenital iodine deficiency syndrome - mixed type         |
| X40HL | All | Iatrogenic hypothyroidism                                  |
| X40HM | All | Postablative hypothyroidism                                |
| XE109 | All | Post-surgical hypothyroidism                               |
| C0410 | All | Irradiation hypothyroidism                                 |
| X40HN | All | Radioactive iodine-induced hypothyroidism                  |
| C041. | All | Other postablative hypothyroidism                          |
| C041z | All | Postablative hypothyroidism NOS                            |
| C043. | All | Other iatrogenic hypothyroidism                            |
| C043z | All | Iatrogenic hypothyroidism NOS                              |
| X40HO | All | Drug-induced hypothyroidism                                |
| C0430 | All | Hypothyroidism resulting from para-aminosalicylic acid     |

|       |     |                                                      |
|-------|-----|------------------------------------------------------|
| C0431 | All | Hypothyroidism resulting from phenylbutazone         |
| C0432 | All | Hypothyroidism resulting from resorcinol             |
| X40HP | All | Post-infectious hypothyroidism                       |
| X40IB | All | Subclinical iodine deficiency hypothyroidism         |
| C042. | All | Iodine hypothyroidism                                |
| C1343 | All | TSH deficiency                                       |
| X40LB | All | Isolated TSH deficiency                              |
| X40LC | All | Idiopathic TSH deficiency                            |
| X40Hv | All | Hypothyroidism due to iodide trapping defect         |
| X40Hw | All | Hypothyroidism due to iodide organification defect   |
| X40Hx | All | Hypothyroidism due to coupling defect                |
| X40Hy | All | Hypothyroidism due to deiodase defect                |
| X40Hz | All | Hypothyroidism due to thyroglobulin synthesis defect |
| Cyu11 | All | [X]Other specified hypothyroidism                    |
| Xa3ec | All | Hypothyroidism - congenital and acquired             |
| Xa08g | All | Transient neonatal hypothyroidism                    |
| Q4337 | All | Neonatal jaundice with congenital hypothyroidism     |

**Supplementary table S4.8.** Read codes used to identify Grave's disease.

| <b>Grave's disease</b> |                |                                       |
|------------------------|----------------|---------------------------------------|
| <b>Read V2 Code</b>    | <b>Term ID</b> | <b>Description</b>                    |
| 66B4.                  | All            | Thyroid eye disease                   |
| C020.                  | All            | Graves' disease                       |
| C0200                  | All            | Toxic diffuse goitre with no crisis   |
| C0201                  | All            | Toxic diffuse goitre with crisis      |
| C020z                  | All            | Toxic diffuse goitre NOS              |
| F4G2.                  | All            | Endocrine exophthalmos                |
| F4G20                  | All            | Thyrotoxic exophthalmos               |
| F4G21                  | All            | Exophthalmic ophthalmoplegia          |
| F4G2z                  | All            | Endocrine exophthalmos NOS            |
| <b>Read CTV3 Code</b>  | <b>Term ID</b> | <b>Description</b>                    |
| F4G2.                  | All            | Dysthyroid ophthalmopathy             |
| F4G20                  | All            | Thyrotoxic exophthalmos               |
| F4G21                  | All            | Exophthalmic ophthalmoplegia          |
| F4G2z                  | All            | Endocrine exophthalmos NOS            |
| X400I                  | All            | Graves' disease                       |
| X40Gk                  | All            | Thyrotoxicosis due to Graves' disease |
| X400K                  | All            | Juvenile Graves' disease              |
| X400R                  | All            | Exophthalmic goitre                   |
| X40Gk                  | All            | Thyrotoxicosis due to Graves' disease |
| XS29G                  | All            | Thyroid eye disease                   |
| XE105                  | All            | Toxic diffuse goitre                  |
| C0200                  | All            | Toxic diffuse goitre with no crisis   |
| C0201                  | All            | Toxic diffuse goitre with crisis      |
| C020z                  | All            | Toxic diffuse goitre NOS              |

**Supplementary table S4.9.** Read codes used to identify psoriatic arthritis.

| <b>Psoriatic arthritis</b>    |                |                                                                   |
|-------------------------------|----------------|-------------------------------------------------------------------|
| <b>Read V2 Code</b>           | <b>Term ID</b> | <b>Description</b>                                                |
| M160.                         | All            | Psoriatic arthropathy                                             |
| M1601                         | All            | Distal interphalangeal psoriatic arthropathy                      |
| M160z                         | All            | Psoriatic arthropathy NOS                                         |
| Nyu13                         | All            | [X]Other psoriatic arthropathies                                  |
| M1600                         | All            | Psoriasis spondylitica                                            |
| M1602                         | All            | Arthritis mutilans                                                |
| <b>Read CTV3 Code</b>         | <b>Term ID</b> | <b>Description</b>                                                |
| M160.                         | All            | Psoriatic arthritis                                               |
| M1600                         | All            | Psoriatic arthritis with spine involvement                        |
| X7026                         | All            | Psoriatic arthritis with distal interphalangeal joint involvement |
| X7027                         | All            | Psoriatic arthritis - destructive type                            |
| X7028                         | All            | Psoriatic dactylitis                                              |
| X701u                         | All            | Juvenile psoriatic arthritis                                      |
| X701v                         | All            | Juvenile psoriatic arthritis with psoriasis                       |
| X701w                         | All            | Juvenile psoriatic arthritis without psoriasis                    |
| M160z                         | All            | Psoriatic arthropathy NOS                                         |
| Nyu13                         | All            | [X]Other psoriatic arthropathies                                  |
| <b>Ankylosing spondylitis</b> |                |                                                                   |
| <b>Read V2 Code</b>           | <b>Term ID</b> | <b>Description</b>                                                |
| N100.                         | All            | Ankylosing spondylitis                                            |
| N0450                         | All            | Juvenile ankylosing spondylitis                                   |
| <b>Read CTV3 Code</b>         | <b>Term ID</b> | <b>Description</b>                                                |
| N100.                         | All            | Ankylosing spondylitis                                            |
| X7023                         | All            | Ankylosing spondylitis with organ / system involvement            |
| X7024                         | All            | Ankylosing spondylitis with multisystem involvement               |
| X701x                         | All            | Juvenile ankylosing spondylitis                                   |

**Supplementary table S4.10.** Read codes used to identify ankylosing spondylitis.

| <b>Ankylosing spondylitis</b> |                |                                                        |
|-------------------------------|----------------|--------------------------------------------------------|
| <b>Read V2 Code</b>           | <b>Term ID</b> | <b>Description</b>                                     |
| N100.                         | All            | Ankylosing spondylitis                                 |
| N0450                         | All            | Juvenile ankylosing spondylitis                        |
| <b>Read CTV3 Code</b>         | <b>Term ID</b> | <b>Description</b>                                     |
| N100.                         | All            | Ankylosing spondylitis                                 |
| X7023                         | All            | Ankylosing spondylitis with organ / system involvement |
| X7024                         | All            | Ankylosing spondylitis with multisystem involvement    |
| X701x                         | All            | Juvenile ankylosing spondylitis                        |

**Supplementary table S4.11.** Read codes used to identify systemic lupus erythematosus.

| <b>Systemic lupus erythematosus</b> |                |                                                                  |
|-------------------------------------|----------------|------------------------------------------------------------------|
| <b>Read V2 Code</b>                 | <b>Term ID</b> | <b>Description</b>                                               |
| N000.                               | All            | Systemic lupus erythematosus                                     |
| N0000                               | All            | Disseminated lupus erythematosus                                 |
| N0001                               | All            | Libman-Sacks disease                                             |
| N0002                               | All            | Drug-induced systemic lupus erythematosus                        |
| N0003                               | All            | Systemic lupus erythematosus with organ or system involvement    |
| N0004                               | All            | Systemic lupus erythematosus with pericarditis                   |
| N0005                               | All            | Neonatal lupus erythematosus                                     |
| N0006                               | All            | Cerebral lupus                                                   |
| N000z                               | All            | Systemic lupus erythematosus NOS                                 |
| K01x4                               | All            | Nephrotic syndrome in systemic lupus erythematosus               |
| <b>Read CTV3 Code</b>               | <b>Term ID</b> | <b>Description</b>                                               |
| N000.                               | All            | Systemic lupus erythematosus                                     |
| X704X                               | All            | Systemic lupus erythematosus with organ/system involvement       |
| XE0da                               | All            | Lupus nephritis                                                  |
| X30Kn                               | All            | Lupus nephritis - WHO Class I                                    |
| X30Ko                               | All            | Lupus nephritis - WHO Class II                                   |
| X30Kp                               | All            | Lupus nephritis - WHO Class III                                  |
| X30Kq                               | All            | Lupus nephritis - WHO Class IV                                   |
| X30Kr                               | All            | Lupus nephritis - WHO Class V                                    |
| X30Ks                               | All            | Lupus nephritis - WHO Class VI                                   |
| XM197                               | All            | [EDTA] Lupus erythematosus associated with renal failure         |
| X00Dx                               | All            | Cerebral lupus                                                   |
| X704a                               | All            | Lupus panniculitis                                               |
| N0001                               | All            | Libman-Sacks disease                                             |
| XaC1J                               | All            | Systemic lupus erythematosus with pericarditis                   |
| X704c                               | All            | Systemic lupus erythematosus with multisystem involvement        |
| N0002                               | All            | Drug-induced systemic lupus erythematosus                        |
| N000z                               | All            | Systemic lupus erythematosus NOS                                 |
| Nyu43                               | All            | [X]Other forms of systemic lupus erythematosus                   |
| X0046                               | All            | Chorea in systemic lupus erythematosus                           |
| H57y4                               | All            | Lung disease with systemic lupus erythematosus                   |
| XaBE1                               | All            | Renal tubulo-interstitial disord in systemic lupus erythematosus |

**Supplementary table S4.12.** Read codes used to identify polymyalgia rheumatica.

| <b>Polymyalgia rheumatica</b> |                |                                                  |
|-------------------------------|----------------|--------------------------------------------------|
| <b>Read V2 Code</b>           | <b>Term ID</b> | <b>Description</b>                               |
| N20..                         | All            | Polymyalgia rheumatica                           |
| N200.                         | All            | Giant cell arteritis with polymyalgia rheumatica |
| <b>Read CTV3 Code</b>         | <b>Term ID</b> | <b>Description</b>                               |
| XE1FJ                         | All            | Polymyalgia rheumatica                           |
| X705I                         | All            | Giant cell arteritis with polymyalgia rheumatica |

**Supplementary table S4.13.** Read codes used to identify Sjögren's syndrome.

| <b>Sjögren's syndrome</b> |                |                                                            |
|---------------------------|----------------|------------------------------------------------------------|
| <b>Read V2 Code</b>       | <b>Term ID</b> | <b>Description</b>                                         |
| N002.                     | All            | Sicca (Sjogren's) syndrome                                 |
| F3967                     | All            | Myopathy due to Sjogren's disease                          |
| H57y3                     | All            | Lung disease with Sjogren's disease                        |
| <b>Read CTV3 Code</b>     | <b>Term ID</b> | <b>Description</b>                                         |
| Xa0hF                     | All            | Sjogren's syndrome                                         |
| X705A                     | All            | Primary Sjogren's syndrome                                 |
| X705B                     | All            | Primary Sjogren's syndrome with organ/system involvement   |
| X705C                     | All            | Primary Sjogren's syndrome with multisystem involvement    |
| X705D                     | All            | Secondary Sjogren's syndrome                               |
| X705E                     | All            | Secondary Sjogren's syndrome with organ/system involvement |
| X705F                     | All            | Secondary Sjogren's syndrome with multisystem involvement  |
| F3967                     | All            | Myopathy due to Sjogren's disease                          |
| H57y3                     | All            | Lung disease with Sjogren's disease                        |



**Supplementary table S4.14.** Read codes used to identify psoriasis.

| <b>Psoriasis</b>      |                |                                             |
|-----------------------|----------------|---------------------------------------------|
| <b>Read V2 Code</b>   | <b>Term ID</b> | <b>Description</b>                          |
| M16..                 | All            | Psoriasis and similar disorders             |
| M161.                 | All            | Other psoriasis                             |
| M1610                 | All            | Psoriasis unspecified                       |
| M1611                 | All            | Psoriasis annularis                         |
| M1612                 | All            | Psoriasis circinata                         |
| M1613                 | All            | Psoriasis diffusa                           |
| M1614                 | All            | Psoriasis discoidea                         |
| M1615                 | All            | Psoriasis geographica                       |
| M1616                 | All            | Guttate psoriasis                           |
| M1617                 | All            | Psoriasis gyrata                            |
| M1618                 | All            | Psoriasis inveterata                        |
| M1619                 | All            | Psoriasis ostracea                          |
| M161A                 | All            | Psoriasis palmaris                          |
| M161B                 | All            | Psoriasis plantaris                         |
| M161C                 | All            | Psoriasis punctata                          |
| M161D                 | All            | Pustular psoriasis                          |
| M161E                 | All            | Psoriasis universalis                       |
| M161F                 | All            | Psoriasis vulgaris                          |
| M161G                 | All            | Acrodermatitis continua                     |
| M161H                 | All            | Erythrodermic psoriasis                     |
| M161J                 | All            | Flexural psoriasis                          |
| M161z                 | All            | Psoriasis NOS                               |
| M166.                 | All            | Palmoplantar pustular psoriasis             |
| M16y.                 | All            | Other psoriasis and similar disorders       |
| M16y0                 | All            | Scalp psoriasis                             |
| M16z.                 | All            | Psoriasis and similar disorders NOS         |
| Myu30                 | All            | [X]Other psoriasis                          |
| <b>Read CTV3 Code</b> | <b>Term ID</b> | <b>Description</b>                          |
| X506Y                 | All            | Psoriasis                                   |
| XaY0x                 | All            | Pustular psoriasis                          |
| X506p                 | All            | Generalised pustular psoriasis              |
| X506q                 | All            | Acute generalised pustular psoriasis        |
| X506r                 | All            | Generalised pustular psoriasis of pregnancy |
| X506s                 | All            | Pustular psoriasis in children              |
| X506t                 | All            | Juvenile pustular psoriasis                 |
| X506u                 | All            | Infantile pustular psoriasis                |
| X506l                 | All            | Localised pustular psoriasis                |
| X506m                 | All            | Palmoplantar pustular psoriasis             |
| M07y0                 | All            | Acute palmoplantar pustular psoriasis       |
| M161A                 | All            | Psoriasis palmaris                          |

|       |     |                                          |
|-------|-----|------------------------------------------|
| M161B | All | Psoriasis plantaris                      |
| X506o | All | Lapiere type of psoriasis                |
| X506v | All | Circinate and annular pustular psoriasis |
| M1611 | All | Psoriasis annularis                      |
| M1612 | All | Psoriasis circinata                      |
| M1614 | All | Plaque psoriasis                         |
| XaNXa | All | Chronic large plaque psoriasis           |
| M1616 | All | Guttate psoriasis                        |
| X506Z | All | Flexural psoriasis                       |
| X506a | All | Unstable psoriasis                       |
| X506b | All | Erythrodermic psoriasis                  |
| X506i | All | Scalp psoriasis                          |
| M161. | All | Other psoriasis                          |
| M1610 | All | Psoriasis unspecified                    |
| M1613 | All | Psoriasis diffusa                        |
| M1615 | All | Psoriasis geographica                    |
| M1617 | All | Psoriasis gyrata                         |
| M1618 | All | Psoriasis inveterata                     |
| M161C | All | Psoriasis punctata                       |
| M161E | All | Psoriasis universalis                    |
| XaNXt | All | Psoriasis vulgaris                       |
| M161z | All | Psoriasis NOS                            |
| Myu30 | All | [X]Other psoriasis                       |

**Supplementary table S4.15.** Read codes used to identify vitiligo.

| <b>Vitiligo</b>       |                |                       |
|-----------------------|----------------|-----------------------|
| <b>Read V2 Code</b>   | <b>Term ID</b> | <b>Description</b>    |
| M2951                 | All            | Vitiligo              |
| F4E53                 | All            | Vitiligo of eyelid    |
| <b>Read CTV3 Code</b> | <b>Term ID</b> | <b>Description</b>    |
| M2951                 | All            | Vitiligo              |
| F4E53                 | All            | Vitiligo of eyelid    |
| X508z                 | All            | Occupational vitiligo |

**Supplementary table S4.16.** Read codes used to identify multiple sclerosis.

| <b>Multiple sclerosis</b> |                |                                                                                              |
|---------------------------|----------------|----------------------------------------------------------------------------------------------|
| <b>Read V2 Code</b>       | <b>Term ID</b> | <b>Description</b>                                                                           |
| 666A.                     | All            | Multiple sclerosis review                                                                    |
| 9mD..                     | All            | Multiple sclerosis monitoring administration                                                 |
| 9mD0.                     | All            | Multiple sclerosis monitoring first letter                                                   |
| 9mD1.                     | All            | Multiple sclerosis monitoring second letter                                                  |
| 9mD2.                     | All            | Multiple sclerosis monitoring telephone invitation                                           |
| 9mD3.                     | All            | Multiple sclerosis monitoring third letter                                                   |
| F20..                     | All            | Multiple sclerosis                                                                           |
| F200.                     | All            | Multiple sclerosis of the brain stem                                                         |
| F201.                     | All            | Multiple sclerosis of the spinal cord                                                        |
| F202.                     | All            | Generalised multiple sclerosis                                                               |
| F203.                     | All            | Exacerbation of multiple sclerosis                                                           |
| F204.                     | All            | Benign multiple sclerosis                                                                    |
| F205.                     | All            | Malignant multiple sclerosis                                                                 |
| F206.                     | All            | Primary progressive multiple sclerosis                                                       |
| F207.                     | All            | Relapsing and remitting multiple sclerosis                                                   |
| F208.                     | All            | Secondary progressive multiple sclerosis                                                     |
| F20z.                     | All            | Multiple sclerosis NOS                                                                       |
| 8CS1.                     | All            | Multiple sclerosis care plan agreed                                                          |
| 9kG..                     | All            | Specialised services for patients with multiple sclerosis - enhanced services administration |
| <b>Read CTV3 Code</b>     | <b>Term ID</b> | <b>Description</b>                                                                           |
| XaKvm                     | All            | Multiple sclerosis review                                                                    |
| XaKvn                     | All            | Multiple sclerosis multidisciplinary review                                                  |
| XaX9A                     | All            | Multiple sclerosis monitoring administration                                                 |
| XaX9F                     | All            | Multiple sclerosis monitoring first letter                                                   |
| XaX9H                     | All            | Multiple sclerosis monitoring second letter                                                  |
| XaX9J                     | All            | Multiple sclerosis monitoring telephone invitation                                           |
| XaX9L                     | All            | Multiple sclerosis monitoring third letter                                                   |
| F20..                     | All            | Multiple sclerosis                                                                           |
| XaP1V                     | All            | Secondary progressive multiple sclerosis                                                     |
| XaP1B                     | All            | Relapsing and remitting multiple sclerosis                                                   |
| XaP0r                     | All            | Primary progressive multiple sclerosis                                                       |
| XaP0X                     | All            | Malignant multiple sclerosis                                                                 |
| XaOzZ                     | All            | Benign multiple sclerosis                                                                    |
| X005c                     | All            | Acute relapsing multiple sclerosis                                                           |
| X005d                     | All            | Chronic progressive multiple sclerosis                                                       |
| X005e                     | All            | Remittent-progressive multiple sclerosis                                                     |
| F200.                     | All            | Multiple sclerosis of the brainstem                                                          |
| F201.                     | All            | Multiple sclerosis of the spinal cord                                                        |
| F202.                     | All            | Generalised multiple sclerosis                                                               |

|       |     |                                                                                            |
|-------|-----|--------------------------------------------------------------------------------------------|
| F203. | All | Exacerbation of multiple sclerosis                                                         |
| F20z. | All | Multiple sclerosis NOS                                                                     |
| XaPSc | All | Management of multiple sclerosis in palliative phase                                       |
| XaPSb | All | Management of multiple sclerosis in progressive disability phase                           |
| XaPSa | All | Management of multiple sclerosis in stable disability phase                                |
| XaPSZ | All | Management of multiple sclerosis in early disease phase                                    |
| XaPSY | All | Management of multiple sclerosis in onset phase                                            |
| XaXsg | All | Referral to community multiple sclerosis team                                              |
| XaKA8 | All | Specialised services for patients with multiple sclerosis enhanced services administration |
| XaKzg | All | Multiple sclerosis care plan agreed                                                        |

## Definitions of common infections with Read code lists.

**Supplementary table S5.1.** The case definitions for included Upper Respiratory Tract Infections.

| <b>Upper Respiratory Tract Infections</b> |                |                                                           |
|-------------------------------------------|----------------|-----------------------------------------------------------|
| <b>Read V2 Code</b>                       | <b>Term ID</b> | <b>Description</b>                                        |
| F51..                                     | All            | Nonsuppurative otitis media + eustachian tube disorders   |
| F510.                                     | All            | Acute non suppurative otitis media                        |
| F5100                                     | All            | Acute otitis media with effusion                          |
| F5101                                     | All            | Acute serous otitis media                                 |
| F5102                                     | All            | Acute mucoid otitis media                                 |
| F5103                                     | All            | Acute sanguinous otitis media                             |
| F5104                                     | All            | Acute allergic serous otitis media                        |
| F5105                                     | All            | Acute allergic mucoid otitis media                        |
| F5106                                     | All            | Acute allergic sanguinous otitis media                    |
| F510z                                     | All            | Acute nonsuppurative otitis media NOS                     |
| F52..                                     | All            | Suppurative and unspecified otitis media                  |
| F520.                                     | All            | Acute suppurative otitis media                            |
| F5200                                     | All            | Acute suppurative otitis media tympanic membrane intact   |
| F5201                                     | All            | Acute suppurative otitis media tympanic membrane ruptured |
| F5203                                     | All            | Acute suppurative otitis media due to disease EC          |
| F520z                                     | All            | Acute suppurative otitis media NOS                        |
| F526.                                     | All            | Acute left otitis media                                   |
| F527.                                     | All            | Acute right otitis media                                  |
| F528.                                     | All            | Acute bilateral otitis media                              |
| F52z.                                     | All            | Otitis media NOS                                          |
| H00..                                     | All            | Acute nasopharyngitis                                     |
| H01..                                     | All            | Acute sinusitis                                           |
| H010.                                     | All            | Acute maxillary sinusitis                                 |
| H011.                                     | All            | Acute frontal sinusitis                                   |
| H012.                                     | All            | Acute ethmoidal sinusitis                                 |
| H013.                                     | All            | Acute sphenoidal sinusitis                                |
| H014.                                     | All            | Acute rhinosinusitis                                      |
| H01y.                                     | All            | Other acute sinusitis                                     |
| H01y0                                     | All            | Acute pansinusitis                                        |
| H01yz                                     | All            | Other acute sinusitis NOS                                 |
| H01z.                                     | All            | Acute sinusitis NOS                                       |
| H02..                                     | All            | Acute pharyngitis                                         |
| H020.                                     | All            | Acute gangrenous pharyngitis                              |
| H021.                                     | All            | Acute phlegmonous pharyngitis                             |
| H022.                                     | All            | Acute ulcerative pharyngitis                              |

|       |     |                                             |
|-------|-----|---------------------------------------------|
| H023. | All | Acute bacterial pharyngitis                 |
| H0230 | All | Acute pneumococcal pharyngitis              |
| H0231 | All | Acute staphylococcal pharyngitis            |
| H023z | All | Acute bacterial pharyngitis NOS             |
| H024. | All | Acute viral pharyngitis                     |
| H025. | All | Allergic pharyngitis                        |
| H02z. | All | Acute pharyngitis NOS                       |
| H03.. | All | Acute tonsillitis                           |
| H030. | All | Acute erythematous tonsillitis              |
| H031. | All | Acute follicular tonsillitis                |
| H032. | All | Acute ulcerative tonsillitis                |
| H033. | All | Acute catarrhal tonsillitis                 |
| H034. | All | Acute gangrenous tonsillitis                |
| H035. | All | Acute bacterial tonsillitis                 |
| H0350 | All | Acute pneumococcal tonsillitis              |
| H0351 | All | Acute staphylococcal tonsillitis            |
| H035z | All | Acute bacterial tonsillitis NOS             |
| H036. | All | Acute viral tonsillitis                     |
| H037. | All | Recurrent acute tonsillitis                 |
| H03z. | All | Acute tonsillitis NOS                       |
| H04.. | All | Acute laryngitis and tracheitis             |
| H040. | All | Acute laryngitis                            |
| H0400 | All | Acute oedematous laryngitis                 |
| H0401 | All | Acute ulcerative laryngitis                 |
| H0402 | All | Acute catarrhal laryngitis                  |
| H0403 | All | Acute phlegmonous laryngitis                |
| H0404 | All | Acute haemophilus influenzae laryngitis     |
| H0405 | All | Acute pneumococcal laryngitis               |
| H0406 | All | Acute suppurative laryngitis                |
| H040w | All | Acute viral laryngitis unspecified          |
| H040x | All | Acute bacterial laryngitis unspecified      |
| H040z | All | Acute laryngitis NOS                        |
| H041. | All | Acute tracheitis                            |
| H0410 | All | Acute tracheitis without obstruction        |
| H0411 | All | Acute tracheitis with obstruction           |
| H041z | All | Acute tracheitis NOS                        |
| H042. | All | Acute laryngotracheitis                     |
| H0420 | All | Acute laryngotracheitis without obstruction |
| H0421 | All | Acute laryngotracheitis with obstruction    |
| H042z | All | Acute laryngotracheitis NOS                 |
| H043. | All | Acute epiglottitis (non strep)              |
| H0430 | All | Acute epiglottitis without obstruction      |

|                       |                |                                                             |
|-----------------------|----------------|-------------------------------------------------------------|
| H0431                 | All            | Acute epiglottitis with obstruction                         |
| H0432                 | All            | Acute obstructive laryngitis                                |
| H043z                 | All            | Acute epiglottitis NOS                                      |
| H044.                 | All            | Croup                                                       |
| H04z.                 | All            | Acute laryngitis and tracheitis NOS                         |
| H05..                 | All            | Other acute upper respiratory infections                    |
| H050.                 | All            | Acute laryngopharyngitis                                    |
| H051.                 | All            | Acute upper respiratory tract infection                     |
| H052.                 | All            | Pharyngotracheitis                                          |
| H053.                 | All            | Tracheopharyngitis                                          |
| H054.                 | All            | Recurrent upper respiratory tract infection                 |
| H055.                 | All            | Pharyngolaryngitis                                          |
| H05y.                 | All            | Other upper respiratory infections of multiple sites        |
| H05z.                 | All            | Upper respiratory infection NOS                             |
| H0y..                 | All            | Other specified acute respiratory infections                |
| H0z..                 | All            | Acute respiratory infection NOS                             |
| <b>Read CTV3 Code</b> | <b>Term ID</b> | <b>Description</b>                                          |
| A3401                 | All            | Streptococcal laryngitis                                    |
| A3403                 | All            | Streptococcal tonsillitis                                   |
| A740.                 | All            | Herpangina                                                  |
| AA12.                 | All            | Vincent's angina - pharyngitis                              |
| F51..                 | All            | Non-suppurative otitis media with eustachian tube disorders |
| F510.                 | All            | Acute non-suppurative otitis media                          |
| F5100                 | All            | Acute otitis media: [with effusion] or [secretory]          |
| F5101                 | All            | Acute non-suppurative otitis media - serous                 |
| F5102                 | All            | Acute non-suppurative otitis media - mucoid                 |
| F5103                 | All            | Acute non-suppurative otitis media - sanguinous             |
| F5104                 | All            | Acute allergic serous otitis media                          |
| F5105                 | All            | Acute allergic mucoid otitis media                          |
| F5106                 | All            | Acute allergic sanguinous otitis media                      |
| F510z                 | All            | Acute non-suppurative otitis media NOS                      |
| F52..                 | All            | Suppurative and unspecified otitis media                    |
| F520.                 | All            | Acute suppurative otitis media                              |
| F5200                 | All            | Acute suppurative otitis media - tympanic membrane intact   |
| F5201                 | All            | Acute suppurative otitis media - tympanic membrane ruptured |
| F5203                 | All            | Acute suppurative otitis media due to disease EC            |
| F520z                 | All            | Acute suppurative otitis media NOS                          |
| F526.                 | All            | Acute left otitis media                                     |
| F527.                 | All            | Acute right otitis media                                    |
| F528.                 | All            | Acute bilateral otitis media                                |
| F52z.                 | All            | Ear infection &/or otitis media NOS                         |
| FyuP0                 | All            | [X]Other acute non-suppurative otitis media                 |
| H00..                 | All            | (Acute nasopharyngitis or rhinitis) or (common cold)        |

|       |     |                                                                    |
|-------|-----|--------------------------------------------------------------------|
| H01.. | All | Sinusitis (& acute)                                                |
| H010. | All | Acute maxillary sinusitis                                          |
| H011. | All | Acute frontal sinusitis                                            |
| H012. | All | Acute ethmoidal sinusitis                                          |
| H013. | All | Acute sphenoidal sinusitis                                         |
| H014. | All | NULL                                                               |
| H01y. | All | Other acute sinusitis                                              |
| H01y0 | All | Acute pansinusitis                                                 |
| H01yz | All | Other acute sinusitis NOS                                          |
| H01z. | All | Acute sinusitis NOS                                                |
| H02.. | All | Throat: [acute pharyngitis] or [sore NOS (& viral)] or [infection] |
| H020. | All | Acute gangrenous pharyngitis                                       |
| H021. | All | Acute phlegmonous pharyngitis                                      |
| H022. | All | Acute ulcerative pharyngitis                                       |
| H023. | All | Acute bacterial pharyngitis                                        |
| H0230 | All | Acute pneumococcal pharyngitis                                     |
| H0231 | All | Acute staphylococcal pharyngitis                                   |
| H023z | All | Acute bacterial pharyngitis NOS                                    |
| H024. | All | Acute viral pharyngitis                                            |
| H025. | All | Allergic pharyngitis                                               |
| H02z. | All | Acute pharyngitis NOS                                              |
| H03.. | All | Tonsillitis (& acute)                                              |
| H030. | All | Acute erythematous tonsillitis                                     |
| H031. | All | Acute follicular tonsillitis                                       |
| H032. | All | Acute ulcerative tonsillitis                                       |
| H033. | All | Acute catarrhal tonsillitis                                        |
| H034. | All | Acute gangrenous tonsillitis                                       |
| H035. | All | Acute bacterial tonsillitis                                        |
| H0350 | All | Acute pneumococcal tonsillitis                                     |
| H0351 | All | Acute staphylococcal tonsillitis                                   |
| H035z | All | Acute bacterial tonsillitis NOS                                    |
| H036. | All | Acute viral tonsillitis                                            |
| H037. | All | Recurrent acute tonsillitis                                        |
| H03z. | All | Acute tonsillitis NOS                                              |
| H04.. | All | NULL                                                               |
| H040. | All | Acute laryngitis                                                   |
| H0400 | All | Acute oedematous laryngitis                                        |
| H0401 | All | Acute ulcerative laryngitis                                        |
| H0402 | All | Acute catarrhal laryngitis                                         |
| H0403 | All | Acute phlegmonous laryngitis                                       |
| H0404 | All | Acute haemophilus influenzae laryngitis                            |
| H0405 | All | Acute pneumococcal laryngitis                                      |



|       |     |                                                      |
|-------|-----|------------------------------------------------------|
| H0406 | All | Acute suppurative laryngitis                         |
| H040w | All | Acute viral laryngitis unspecified                   |
| H040x | All | Acute bacterial laryngitis unspecified               |
| H040z | All | Acute laryngitis NOS                                 |
| H041. | All | Acute tracheitis                                     |
| H0410 | All | Acute tracheitis without obstruction                 |
| H0411 | All | Acute tracheitis with obstruction                    |
| H041z | All | Acute tracheitis NOS                                 |
| H042. | All | Laryngotracheitis (& acute)                          |
| H0420 | All | Acute laryngotracheitis without obstruction          |
| H0421 | All | Acute laryngotracheitis with obstruction             |
| H042z | All | Acute laryngotracheitis NOS                          |
| H043. | All | Epiglottitis: [viral] or [acute non streptococcal]   |
| H0430 | All | Acute epiglottitis without obstruction               |
| H0431 | All | Acute epiglottitis with obstruction                  |
| H0432 | All | NULL                                                 |
| H043z | All | Acute epiglottitis NOS                               |
| H044. | All | NULL                                                 |
| H04z. | All | Acute laryngitis and tracheitis NOS                  |
| H05.. | All | Other acute upper respiratory infections             |
| H050. | All | Acute laryngopharyngitis                             |
| H051. | All | NULL                                                 |
| H052. | All | NULL                                                 |
| H053. | All | Tracheopharyngitis                                   |
| H054. | All | Recurrent upper respiratory tract infection          |
| H055. | All | Pharyngolaryngitis                                   |
| H05y. | All | Other upper respiratory infections of multiple sites |
| H05z. | All | Upper respiratory tract infection (& viral) NOS      |
| H0y.. | All | Other specified acute respiratory infections         |
| H0z.. | All | Acute respiratory infection NOS                      |
| X00iq | All | Recurrent acute suppurative otitis media             |
| X00m1 | All | Pott's puffy tumour                                  |
| X00mH | All | Acute herpes simplex pharyngitis                     |
| X00mI | All | Acute herpes zoster pharyngitis                      |
| X00mJ | All | Enteroviral lymphonodular pharyngitis                |
| X00mL | All | Glandular fever pharyngitis                          |
| X00mq | All | Vincent's tonsillitis                                |
| X00n1 | All | Acute simple laryngitis                              |
| X00n2 | All | Vincent's laryngitis                                 |
| X00n4 | All | Acute membranous laryngitis                          |
| X00n5 | All | Acute subglottic laryngitis                          |
| X00n6 | All | Recurrent allergic croup                             |

|       |     |                                                                              |
|-------|-----|------------------------------------------------------------------------------|
| X1003 | All | Viral upper respiratory tract infection NOS                                  |
| Xa0IW | All | Acute laryngotracheobronchitis                                               |
| Xa86D | All | Acute viral laryngotracheitis                                                |
| XaKyZ | All | Acute obstructive laryngitis                                                 |
| XE0Xo | All | Acute laryngotracheitis                                                      |
| XE0Xq | All | Upper respiratory infection NOS                                              |
| XE17D | All | Otitis media NOS                                                             |
| XE1A1 | All | Suppurative otitis media &/or ([left] or [right]) &/or purulent otitis media |
| XE2QD | All | Acute otitis media with effusion                                             |
| XM1QT | All | Acute fibrinous laryngotracheobronchitis                                     |

**Supplementary table S5.2.** The case definitions for included Lower Respiratory Tract Infections.

| <b>Lower Respiratory Tract Infections</b> |                |                                                       |
|-------------------------------------------|----------------|-------------------------------------------------------|
| <b>Pneumonia</b>                          |                |                                                       |
| <b>Read V2 Code</b>                       | <b>Term ID</b> | <b>Description</b>                                    |
| H20..                                     | All            | Viral pneumonia                                       |
| H200.                                     | All            | Pneumonia due to adenovirus                           |
| H201.                                     | All            | Pneumonia due to respiratory syncytial virus          |
| H202.                                     | All            | Pneumonia due to parainfluenza virus                  |
| H203.                                     | All            | Pneumonia due to human metapneumovirus                |
| H20y.                                     | All            | Viral pneumonia NEC                                   |
| H20y0                                     | All            | Severe acute respiratory syndrome                     |
| H20z.                                     | All            | Viral pneumonia NOS                                   |
| H21..                                     | All            | Lobar (pneumococcal) pneumonia                        |
| H22..                                     | All            | Other bacterial pneumonia                             |
| H220.                                     | All            | Pneumonia due to klebsiella pneumoniae                |
| H221.                                     | All            | Pneumonia due to pseudomonas                          |
| H222.                                     | All            | Pneumonia due to haemophilus influenzae               |
| H223.                                     | All            | Pneumonia due to streptococcus                        |
| H2230                                     | All            | Pneumonia due to streptococcus, group B               |
| H224.                                     | All            | Pneumonia due to staphylococcus                       |
| H22y.                                     | All            | Pneumonia due to other specified bacteria             |
| H22y0                                     | All            | Pneumonia due to escherichia coli                     |
| H22y1                                     | All            | Pneumonia due to proteus                              |
| H22y2                                     | All            | Pneumonia - Legionella                                |
| H22y3                                     | All            | Pneumonia due to Gram negative bacteria               |
| H22yX                                     | All            | Pneumonia due to other aerobic gram-negative bacteria |
| H22yz                                     | All            | Pneumonia due to bacteria NOS                         |
| H22z.                                     | All            | Bacterial pneumonia NOS                               |
| H23..                                     | All            | Pneumonia due to other specified organisms            |
| H230.                                     | All            | Pneumonia due to Eaton's agent                        |
| H231.                                     | All            | Pneumonia due to mycoplasma pneumoniae                |
| H232.                                     | All            | Pneumonia due to pleuropneumonia like organisms       |
| H233.                                     | All            | Chlamydial pneumonia                                  |
| H23z.                                     | All            | Pneumonia due to specified organism NOS               |
| H24..                                     | All            | Pneumonia with infectious diseases EC                 |
| H240.                                     | All            | Pneumonia with measles                                |
| H241.                                     | All            | Pneumonia with cytomegalic inclusion disease          |
| H242.                                     | All            | Pneumonia with ornithosis                             |
| H243.                                     | All            | Pneumonia with whooping cough                         |
| H244.                                     | All            | Pneumonia with tularaemia                             |
| H245.                                     | All            | Pneumonia with anthrax                                |
| H246.                                     | All            | Pneumonia with aspergillosis                          |

|                       |                |                                                 |
|-----------------------|----------------|-------------------------------------------------|
| H247.                 | All            | Pneumonia with other systemic mycoses           |
| H2470                 | All            | Pneumonia with candidiasis                      |
| H2471                 | All            | Pneumonia with coccidioidomycosis               |
| H2472                 | All            | Pneumonia with histoplasmosis                   |
| H247z                 | All            | Pneumonia with systemic mycosis NOS             |
| H24y.                 | All            | Pneumonia with other infectious diseases EC     |
| H24y0                 | All            | Pneumonia with actinomycosis                    |
| H24y1                 | All            | Pneumonia with nocardiasis                      |
| H24y2                 | All            | Pneumonia with pneumocystis carinii             |
| H24y3                 | All            | Pneumonia with Q-fever                          |
| H24y4                 | All            | Pneumonia with salmonellosis                    |
| H24y5                 | All            | Pneumonia with toxoplasmosis                    |
| H24y6                 | All            | Pneumonia with typhoid fever                    |
| H24y7                 | All            | Pneumonia with varicella                        |
| H24yz                 | All            | Pneumonia with other infectious diseases EC NOS |
| H24z.                 | All            | Pneumonia with infectious diseases EC NOS       |
| H25..                 | All            | Bronchopneumonia due to unspecified organism    |
| H26..                 | All            | Pneumonia due to unspecified organism           |
| H260.                 | All            | Lobar pneumonia due to unspecified organism     |
| H2600                 | All            | Lung consolidation                              |
| H261.                 | All            | Basal pneumonia due to unspecified organism     |
| H262.                 | All            | Postoperative pneumonia                         |
| H263.                 | All            | Pneumonitis, unspecified                        |
| H28..                 | All            | Atypical pneumonia                              |
| <b>Read CTV3 Code</b> | <b>Term ID</b> | <b>Description</b>                              |
| H20..                 | All            | Viral pneumonia (& chest infection)             |
| H200.                 | All            | Adenoviral pneumonia                            |
| H201.                 | All            | Pneumonia due to respiratory syncytial virus    |
| H202.                 | All            | Parainfluenzal pneumonia                        |
| H203.                 | All            | NULL                                            |
| H20y.                 | All            | Viral pneumonia NEC                             |
| H20y0                 | All            | NULL                                            |
| H20z.                 | All            | Viral pneumonia NOS                             |
| H21..                 | All            | Pneumococcal pneumonia (& lobar)                |
| H22..                 | All            | Other bacterial pneumonia                       |
| H220.                 | All            | Pneumonia due to Klebsiella pneumoniae          |
| H221.                 | All            | Pseudomonal pneumonia                           |
| H222.                 | All            | Haemophilus influenzae pneumonia                |
| H223.                 | All            | Streptococcal pneumonia                         |
| H2230                 | All            | Group B streptococcal pneumonia                 |
| H224.                 | All            | Staphylococcal pneumonia                        |
| H22y.                 | All            | Pneumonia due to other specified bacteria       |
| H22y0                 | All            | Escherichia coli pneumonia                      |
| H22y1                 | All            | Proteus pneumonia                               |

|       |     |                                                                             |
|-------|-----|-----------------------------------------------------------------------------|
| H22y2 | All | Legionella pneumonia                                                        |
| H22y3 | All | NULL                                                                        |
| H22yX | All | NULL                                                                        |
| H22yz | All | Pneumonia due to bacteria NOS                                               |
| H22z. | All | Bacterial pneumonia NOS                                                     |
| H23.. | All | Pneumonia due to other specified organisms                                  |
| H230. | All | NULL                                                                        |
| H231. | All | NULL                                                                        |
| H232. | All | Pneumonia due to pleuropneumonia-like organism                              |
| H233. | All | NULL                                                                        |
| H23z. | All | Pneumonia due to specified organism NOS                                     |
| H24.. | All | (Pneumonia) or (chest infection) with infectious diseases EC                |
| H240. | All | Measles pneumonia                                                           |
| H241. | All | Cytomegalovirus pneumonia                                                   |
| H242. | All | Ornithosis with pneumonia                                                   |
| H243. | All | Pertussis pneumonia                                                         |
| H244. | All | Tularaemia pneumonia                                                        |
| H245. | All | Anthrax pneumonia                                                           |
| H246. | All | Pneumonia with aspergillosis                                                |
| H247. | All | Pneumonia with other systemic mycoses                                       |
| H2470 | All | Candidal pneumonia                                                          |
| H2471 | All | Pneumonia with coccidioidomycosis                                           |
| H2472 | All | Pneumonia with histoplasmosis                                               |
| H247z | All | Pneumonia with systemic mycosis NOS                                         |
| H24y. | All | Pneumonia with other infectious diseases EC                                 |
| H24y0 | All | Actinomycotic pneumonia                                                     |
| H24y1 | All | Nocardial pneumonia                                                         |
| H24y2 | All | Pneumocystis carinii pneumonia                                              |
| H24y3 | All | Q fever pneumonia                                                           |
| H24y4 | All | NULL                                                                        |
| H24y5 | All | Toxoplasma pneumonia                                                        |
| H24y6 | All | Typhoid pneumonia                                                           |
| H24y7 | All | Chickenpox pneumonia                                                        |
| H24yz | All | Pneumonia with other infectious diseases EC NOS                             |
| H24z. | All | Pneumonia with infectious diseases EC NOS                                   |
| H25.. | All | Bronchopneumonia: [unspecified organism] or [chest infection - unspecified] |
| H26.. | All | Pneumonia due to unspecified organism                                       |
| H260. | All | Lobar pneumonia due to unspecified organism                                 |
| H2600 | All | NULL                                                                        |
| H261. | All | NULL                                                                        |
| H262. | All | NULL                                                                        |
| H263. | All | NULL                                                                        |
| H28.. | All | NULL                                                                        |
| X100h | All | Giant cell pneumonia                                                        |
| XaBE9 | All | Basal pneumonia due to unspecified organism                                 |

|                         |                |                                                        |
|-------------------------|----------------|--------------------------------------------------------|
| XaDtl                   | All            | Legionnaire's disease                                  |
| XEOYJ                   | All            | Bronchopneumonia due to unspecified organism           |
| <b>Acute Bronchitis</b> |                |                                                        |
| <b>Read V2 Code</b>     | <b>Term ID</b> | <b>Description</b>                                     |
| H06..                   | All            | Acute bronchitis and bronchiolitis                     |
| H060.                   | All            | Acute bronchitis                                       |
| H0600                   | All            | Acute fibrinous bronchitis                             |
| H0601                   | All            | Acute membranous bronchitis                            |
| H0602                   | All            | Acute pseudomembranous bronchitis                      |
| H0603                   | All            | Acute purulent bronchitis                              |
| H0604                   | All            | Acute croupous bronchitis                              |
| H0605                   | All            | Acute tracheobronchitis                                |
| H0606                   | All            | Acute pneumococcal bronchitis                          |
| H0607                   | All            | Acute streptococcal bronchitis                         |
| H0608                   | All            | Acute haemophilus influenzae bronchitis                |
| H0609                   | All            | Acute neisseria catarrhalis bronchitis                 |
| H060A                   | All            | Acute bronchitis due to mycoplasma pneumoniae          |
| H060B                   | All            | Acute bronchitis due to coxsackievirus                 |
| H060C                   | All            | Acute bronchitis due to parainfluenza virus            |
| H060D                   | All            | Acute bronchitis due to respiratory syncytial virus    |
| H060E                   | All            | Acute bronchitis due to rhinovirus                     |
| H060F                   | All            | Acute bronchitis due to echovirus                      |
| H060v                   | All            | Subacute bronchitis unspecified                        |
| H060w                   | All            | Acute viral bronchitis unspecified                     |
| H060x                   | All            | Acute bacterial bronchitis unspecified                 |
| H060z                   | All            | Acute bronchitis NOS                                   |
| H061.                   | All            | Acute bronchiolitis                                    |
| H0610                   | All            | Acute capillary bronchiolitis                          |
| H0611                   | All            | Acute obliterating bronchiolitis                       |
| H0612                   | All            | Acute bronchiolitis with bronchospasm                  |
| H0613                   | All            | Acute exudative bronchiolitis                          |
| H0614                   | All            | Obliterating fibrous bronchiolitis                     |
| H0615                   | All            | Acute bronchiolitis due to respiratory syncytial virus |
| H0616                   | All            | Acute bronchiolitis due to other specified organisms   |
| H0617                   | All            | Acute bronchiolitis due to human metapneumovirus       |
| H061z                   | All            | Acute bronchiolitis NOS                                |
| H062.                   | All            | Acute lower respiratory tract infection                |
| H06z.                   | All            | Acute bronchitis or bronchiolitis NOS                  |
| H06z0                   | All            | Chest infection NOS                                    |
| H06z1                   | All            | Lower resp tract infection                             |
| H06z2                   | All            | Recurrent chest infection                              |
| H30..                   | All            | Bronchitis unspecified                                 |
| H300.                   | All            | Tracheobronchitis NOS                                  |

|                |         |                                                          |
|----------------|---------|----------------------------------------------------------|
| H301.          | All     | Laryngotracheobronchitis                                 |
| H302.          | All     | Wheezy bronchitis                                        |
| H30z.          | All     | Bronchitis NOS                                           |
| Read CTV3 Code | Term ID | Description                                              |
| A33y.          | All     | Whooping cough - other specified organism                |
| A33yz          | All     | Other whooping cough NOS                                 |
| A33z.          | All     | Whooping cough NOS                                       |
| Ayu39          | All     | [X]Whooping cough due to other <i>Bordetella</i> species |
| Ayu3A          | All     | [X]Whooping cough, unspecified                           |
| H06..          | All     | Acute bronchitis and bronchiolitis                       |
| H060.          | All     | Acute bronchitis (& wheezy)                              |
| H0600          | All     | Acute fibrinous bronchitis                               |
| H0601          | All     | Acute membranous bronchitis                              |
| H0602          | All     | Acute pseudomembranous bronchitis                        |
| H0603          | All     | Acute purulent bronchitis                                |
| H0604          | All     | Acute croupous bronchitis                                |
| H0605          | All     | Acute tracheobronchitis                                  |
| H0606          | All     | Acute pneumococcal bronchitis                            |
| H0607          | All     | Acute streptococcal bronchitis                           |
| H0608          | All     | Acute haemophilus influenzae bronchitis                  |
| H0609          | All     | Acute <i>Neisseria catarrhalis</i> bronchitis            |
| H060A          | All     | NULL                                                     |
| H060B          | All     | Acute coxsackievirus bronchitis                          |
| H060C          | All     | Acute parainfluenza virus bronchitis                     |
| H060D          | All     | Acute respiratory syncytial virus bronchitis             |
| H060E          | All     | Acute bronchitis due to rhinovirus                       |
| H060F          | All     | Acute echovirus bronchitis                               |
| H060v          | All     | Subacute bronchitis unspecified                          |
| H060w          | All     | Acute viral bronchitis unspecified                       |
| H060x          | All     | Acute bacterial bronchitis unspecified                   |
| H060z          | All     | Acute bronchitis NOS                                     |
| H061.          | All     | Acute bronchiolitis                                      |
| H0610          | All     | Acute capillary bronchiolitis                            |
| H0611          | All     | Acute obliterating bronchiolitis                         |
| H0612          | All     | Acute bronchiolitis with bronchospasm                    |
| H0613          | All     | Acute exudative bronchiolitis                            |
| H0614          | All     | Obliterating fibrous bronchiolitis                       |
| H0615          | All     | Acute bronchiolitis due to respiratory syncytial virus   |
| H0616          | All     | Acute bronchiolitis due to other specified organisms     |
| H0617          | All     | NULL                                                     |
| H061z          | All     | Acute bronchiolitis NOS                                  |
| H062.          | All     | NULL                                                     |

|       |     |                                                                     |
|-------|-----|---------------------------------------------------------------------|
| H06z. | All | Acute bronchitis or bronchiolitis NOS                               |
| H06z0 | All | Chest infection (& NOS)                                             |
| H06z1 | All | Respiratory tract infection (& [acute lower] or [lower])            |
| H06z2 | All | NULL                                                                |
| H243. | All | Pertussis pneumonia                                                 |
| H30.. | All | Bronchitis: [unspecified (& chest infection)] or [recurrent wheezy] |
| H300. | All | Tracheobronchitis NOS                                               |
| H301. | All | Laryngotracheobronchitis                                            |
| H302. | All | NULL                                                                |
| H30z. | All | Bronchitis NOS                                                      |
| Hyu10 | All | [X]Acute bronchitis due to other specified organisms                |
| Hyu11 | All | [X]Acute bronchiolitis due to other specified organisms             |
| X1006 | All | Chest infection - unspecified bronchitis                            |
| X1007 | All | Acute bacterial bronchitis                                          |
| X1009 | All | Acute mycoplasmal bronchitis                                        |
| X100A | All | Acute chlamydial bronchitis                                         |
| X100B | All | Acute viral bronchitis                                              |
| X100C | All | Acute viral bronchiolitis                                           |
| X100D | All | Acute bronchiolitis due to adenovirus                               |
| Xa0IW | All | Acute laryngotracheobronchitis                                      |
| Xa0IZ | All | Asthmatic bronchitis                                                |
| XaDtB | All | Acute infective bronchitis                                          |
| XaDth | All | Acute infective tracheobronchitis                                   |
| XaYYt | All | Acute bronchiolitis due to human metapneumovirus                    |
| XE0Qw | All | Whooping cough                                                      |
| XE0Xr | All | Acute bronchitis                                                    |
| XE0YL | All | Bronchitis unspecified                                              |
| XE0Yt | All | Acute: [bronchitis] or [chest infections] or [tracheobronchitis]    |
| XM1QT | All | Acute fibrinous laryngotracheobronchitis                            |
| XM1QX | All | Acute wheezy bronchitis                                             |



**Supplementary table S5.3.** The case definitions for included Pneumonia and Pneumonitis.

| Pneumonia and Pneumonitis |         |                                                       |
|---------------------------|---------|-------------------------------------------------------|
| Read V2 Code              | Term ID | Description                                           |
| H20..                     | All     | Viral pneumonia                                       |
| H200.                     | All     | Pneumonia due to adenovirus                           |
| H201.                     | All     | Pneumonia due to respiratory syncytial virus          |
| H202.                     | All     | Pneumonia due to parainfluenza virus                  |
| H203.                     | All     | Pneumonia due to human metapneumovirus                |
| H20y.                     | All     | Viral pneumonia NEC                                   |
| H20y0                     | All     | Severe acute respiratory syndrome                     |
| H20z.                     | All     | Viral pneumonia NOS                                   |
| H21..                     | All     | Lobar (pneumococcal) pneumonia                        |
| H22..                     | All     | Other bacterial pneumonia                             |
| H220.                     | All     | Pneumonia due to klebsiella pneumoniae                |
| H221.                     | All     | Pneumonia due to pseudomonas                          |
| H222.                     | All     | Pneumonia due to haemophilus influenzae               |
| H223.                     | All     | Pneumonia due to streptococcus                        |
| H2230                     | All     | Pneumonia due to streptococcus, group B               |
| H224.                     | All     | Pneumonia due to staphylococcus                       |
| H22y.                     | All     | Pneumonia due to other specified bacteria             |
| H22y0                     | All     | Pneumonia due to escherichia coli                     |
| H22y1                     | All     | Pneumonia due to proteus                              |
| H22y2                     | All     | Pneumonia - Legionella                                |
| H22y3                     | All     | Pneumonia due to Gram negative bacteria               |
| H22yX                     | All     | Pneumonia due to other aerobic gram-negative bacteria |
| H22yz                     | All     | Pneumonia due to bacteria NOS                         |
| H22z.                     | All     | Bacterial pneumonia NOS                               |
| H23..                     | All     | Pneumonia due to other specified organisms            |
| H230.                     | All     | Pneumonia due to Eaton's agent                        |
| H231.                     | All     | Pneumonia due to mycoplasma pneumoniae                |
| H232.                     | All     | Pneumonia due to pleuropneumonia like organisms       |
| H233.                     | All     | Chlamydial pneumonia                                  |
| H23z.                     | All     | Pneumonia due to specified organism NOS               |
| H24..                     | All     | Pneumonia with infectious diseases EC                 |
| H240.                     | All     | Pneumonia with measles                                |
| H241.                     | All     | Pneumonia with cytomegalic inclusion disease          |
| H242.                     | All     | Pneumonia with ornithosis                             |
| H243.                     | All     | Pneumonia with whooping cough                         |
| H244.                     | All     | Pneumonia with tularaemia                             |
| H245.                     | All     | Pneumonia with anthrax                                |
| H246.                     | All     | Pneumonia with aspergillosis                          |
| H247.                     | All     | Pneumonia with other systemic mycoses                 |

|                       |                |                                                 |
|-----------------------|----------------|-------------------------------------------------|
| H2470                 | All            | Pneumonia with candidiasis                      |
| H2471                 | All            | Pneumonia with coccidioidomycosis               |
| H2472                 | All            | Pneumonia with histoplasmosis                   |
| H247z                 | All            | Pneumonia with systemic mycosis NOS             |
| H24y.                 | All            | Pneumonia with other infectious diseases EC     |
| H24y0                 | All            | Pneumonia with actinomycosis                    |
| H24y1                 | All            | Pneumonia with nocardiasis                      |
| H24y2                 | All            | Pneumonia with pneumocystis carinii             |
| H24y3                 | All            | Pneumonia with Q-fever                          |
| H24y4                 | All            | Pneumonia with salmonellosis                    |
| H24y5                 | All            | Pneumonia with toxoplasmosis                    |
| H24y6                 | All            | Pneumonia with typhoid fever                    |
| H24y7                 | All            | Pneumonia with varicella                        |
| H24yz                 | All            | Pneumonia with other infectious diseases EC NOS |
| H24z.                 | All            | Pneumonia with infectious diseases EC NOS       |
| H25..                 | All            | Bronchopneumonia due to unspecified organism    |
| H26..                 | All            | Pneumonia due to unspecified organism           |
| H260.                 | All            | Lobar pneumonia due to unspecified organism     |
| H2600                 | All            | Lung consolidation                              |
| H261.                 | All            | Basal pneumonia due to unspecified organism     |
| H262.                 | All            | Postoperative pneumonia                         |
| H263.                 | All            | Pneumonitis, unspecified                        |
| H28..                 | All            | Atypical pneumonia                              |
| <b>Read CTV3 Code</b> | <b>Term ID</b> | <b>Description</b>                              |
| H20..                 | All            | Viral pneumonia (& chest infection)             |
| H200.                 | All            | Adenoviral pneumonia                            |
| H201.                 | All            | Pneumonia due to respiratory syncytial virus    |
| H202.                 | All            | Parainfluenzal pneumonia                        |
| H203.                 | All            | NULL                                            |
| H20y.                 | All            | Viral pneumonia NEC                             |
| H20y0                 | All            | NULL                                            |
| H20z.                 | All            | Viral pneumonia NOS                             |
| H21..                 | All            | Pneumococcal pneumonia (& lobar)                |
| H22..                 | All            | Other bacterial pneumonia                       |
| H220.                 | All            | Pneumonia due to Klebsiella pneumoniae          |
| H221.                 | All            | Pseudomonal pneumonia                           |
| H222.                 | All            | Haemophilus influenzae pneumonia                |
| H223.                 | All            | Streptococcal pneumonia                         |
| H2230                 | All            | Group B streptococcal pneumonia                 |
| H224.                 | All            | Staphylococcal pneumonia                        |
| H22y.                 | All            | Pneumonia due to other specified bacteria       |
| H22y0                 | All            | Escherichia coli pneumonia                      |
| H22y1                 | All            | Proteus pneumonia                               |
| H22y2                 | All            | Legionella pneumonia                            |

|       |     |                                                                             |
|-------|-----|-----------------------------------------------------------------------------|
| H22y3 | All | NULL                                                                        |
| H22yX | All | NULL                                                                        |
| H22yz | All | Pneumonia due to bacteria NOS                                               |
| H22z. | All | Bacterial pneumonia NOS                                                     |
| H23.. | All | Pneumonia due to other specified organisms                                  |
| H230. | All | NULL                                                                        |
| H231. | All | NULL                                                                        |
| H232. | All | Pneumonia due to pleuropneumonia-like organism                              |
| H233. | All | NULL                                                                        |
| H23z. | All | Pneumonia due to specified organism NOS                                     |
| H24.. | All | (Pneumonia) or (chest infection) with infectious diseases EC                |
| H240. | All | Measles pneumonia                                                           |
| H241. | All | Cytomegalovirus pneumonia                                                   |
| H242. | All | Ornithosis with pneumonia                                                   |
| H243. | All | Pertussis pneumonia                                                         |
| H244. | All | Tularaemia pneumonia                                                        |
| H245. | All | Anthrax pneumonia                                                           |
| H246. | All | Pneumonia with aspergillosis                                                |
| H247. | All | Pneumonia with other systemic mycoses                                       |
| H2470 | All | Candidal pneumonia                                                          |
| H2471 | All | Pneumonia with coccidioidomycosis                                           |
| H2472 | All | Pneumonia with histoplasmosis                                               |
| H247z | All | Pneumonia with systemic mycosis NOS                                         |
| H24y. | All | Pneumonia with other infectious diseases EC                                 |
| H24y0 | All | Actinomycotic pneumonia                                                     |
| H24y1 | All | Nocardial pneumonia                                                         |
| H24y2 | All | Pneumocystis carinii pneumonia                                              |
| H24y3 | All | Q fever pneumonia                                                           |
| H24y4 | All | NULL                                                                        |
| H24y5 | All | Toxoplasma pneumonia                                                        |
| H24y6 | All | Typhoid pneumonia                                                           |
| H24y7 | All | Chickenpox pneumonia                                                        |
| H24yz | All | Pneumonia with other infectious diseases EC NOS                             |
| H24z. | All | Pneumonia with infectious diseases EC NOS                                   |
| H25.. | All | Bronchopneumonia: [unspecified organism] or [chest infection - unspecified] |
| H26.. | All | Pneumonia due to unspecified organism                                       |
| H260. | All | Lobar pneumonia due to unspecified organism                                 |
| H2600 | All | NULL                                                                        |
| H261. | All | NULL                                                                        |
| H262. | All | NULL                                                                        |
| H263. | All | NULL                                                                        |
| H28.. | All | NULL                                                                        |
| X100h | All | Giant cell pneumonia                                                        |
| XaBE9 | All | Basal pneumonia due to unspecified organism                                 |
| XaDtl | All | Legionnaire's disease                                                       |

|       |     |                                              |
|-------|-----|----------------------------------------------|
| XEOYJ | All | Bronchopneumonia due to unspecified organism |
|-------|-----|----------------------------------------------|

**Supplementary table S5.4.** The case definitions for included Acute Bronchitis

| <b>Acute Bronchitis</b> |                |                                                        |
|-------------------------|----------------|--------------------------------------------------------|
| <b>Read V2 Code</b>     | <b>Term ID</b> | <b>Description</b>                                     |
| H06..                   | All            | Acute bronchitis and bronchiolitis                     |
| H060.                   | All            | Acute bronchitis                                       |
| H0600                   | All            | Acute fibrinous bronchitis                             |
| H0601                   | All            | Acute membranous bronchitis                            |
| H0602                   | All            | Acute pseudomembranous bronchitis                      |
| H0603                   | All            | Acute purulent bronchitis                              |
| H0604                   | All            | Acute croupous bronchitis                              |
| H0605                   | All            | Acute tracheobronchitis                                |
| H0606                   | All            | Acute pneumococcal bronchitis                          |
| H0607                   | All            | Acute streptococcal bronchitis                         |
| H0608                   | All            | Acute haemophilus influenzae bronchitis                |
| H0609                   | All            | Acute neisseria catarrhalis bronchitis                 |
| H060A                   | All            | Acute bronchitis due to mycoplasma pneumoniae          |
| H060B                   | All            | Acute bronchitis due to coxsackievirus                 |
| H060C                   | All            | Acute bronchitis due to parainfluenza virus            |
| H060D                   | All            | Acute bronchitis due to respiratory syncytial virus    |
| H060E                   | All            | Acute bronchitis due to rhinovirus                     |
| H060F                   | All            | Acute bronchitis due to echovirus                      |
| H060v                   | All            | Subacute bronchitis unspecified                        |
| H060w                   | All            | Acute viral bronchitis unspecified                     |
| H060x                   | All            | Acute bacterial bronchitis unspecified                 |
| H060z                   | All            | Acute bronchitis NOS                                   |
| H061.                   | All            | Acute bronchiolitis                                    |
| H0610                   | All            | Acute capillary bronchiolitis                          |
| H0611                   | All            | Acute obliterating bronchiolitis                       |
| H0612                   | All            | Acute bronchiolitis with bronchospasm                  |
| H0613                   | All            | Acute exudative bronchiolitis                          |
| H0614                   | All            | Obliterating fibrous bronchiolitis                     |
| H0615                   | All            | Acute bronchiolitis due to respiratory syncytial virus |
| H0616                   | All            | Acute bronchiolitis due to other specified organisms   |
| H0617                   | All            | Acute bronchiolitis due to human metapneumovirus       |
| H061z                   | All            | Acute bronchiolitis NOS                                |
| H062.                   | All            | Acute lower respiratory tract infection                |
| H06z.                   | All            | Acute bronchitis or bronchiolitis NOS                  |
| H06z0                   | All            | Chest infection NOS                                    |
| H06z1                   | All            | Lower resp tract infection                             |
| H06z2                   | All            | Recurrent chest infection                              |
| H30..                   | All            | Bronchitis unspecified                                 |
| H300.                   | All            | Tracheobronchitis NOS                                  |

|                       |                |                                                        |
|-----------------------|----------------|--------------------------------------------------------|
| H301.                 | All            | Laryngotracheobronchitis                               |
| H302.                 | All            | Wheezy bronchitis                                      |
| H30z.                 | All            | Bronchitis NOS                                         |
| <b>Read CTV3 Code</b> | <b>Term ID</b> | <b>Description</b>                                     |
| A33y.                 | All            | Whooping cough - other specified organism              |
| A33yz                 | All            | Other whooping cough NOS                               |
| A33z.                 | All            | Whooping cough NOS                                     |
| Ayu39                 | All            | [X]Whooping cough due to other Bordetella species      |
| Ayu3A                 | All            | [X]Whooping cough, unspecified                         |
| H06..                 | All            | Acute bronchitis and bronchiolitis                     |
| H060.                 | All            | Acute bronchitis (& wheezy)                            |
| H0600                 | All            | Acute fibrinous bronchitis                             |
| H0601                 | All            | Acute membranous bronchitis                            |
| H0602                 | All            | Acute pseudomembranous bronchitis                      |
| H0603                 | All            | Acute purulent bronchitis                              |
| H0604                 | All            | Acute croupous bronchitis                              |
| H0605                 | All            | Acute tracheobronchitis                                |
| H0606                 | All            | Acute pneumococcal bronchitis                          |
| H0607                 | All            | Acute streptococcal bronchitis                         |
| H0608                 | All            | Acute haemophilus influenzae bronchitis                |
| H0609                 | All            | Acute Neisseria catarrhalis bronchitis                 |
| H060A                 | All            | NULL                                                   |
| H060B                 | All            | Acute coxsackievirus bronchitis                        |
| H060C                 | All            | Acute parainfluenza virus bronchitis                   |
| H060D                 | All            | Acute respiratory syncytial virus bronchitis           |
| H060E                 | All            | Acute bronchitis due to rhinovirus                     |
| H060F                 | All            | Acute echovirus bronchitis                             |
| H060v                 | All            | Subacute bronchitis unspecified                        |
| H060w                 | All            | Acute viral bronchitis unspecified                     |
| H060x                 | All            | Acute bacterial bronchitis unspecified                 |
| H060z                 | All            | Acute bronchitis NOS                                   |
| H061.                 | All            | Acute bronchiolitis                                    |
| H0610                 | All            | Acute capillary bronchiolitis                          |
| H0611                 | All            | Acute obliterating bronchiolitis                       |
| H0612                 | All            | Acute bronchiolitis with bronchospasm                  |
| H0613                 | All            | Acute exudative bronchiolitis                          |
| H0614                 | All            | Obliterating fibrous bronchiolitis                     |
| H0615                 | All            | Acute bronchiolitis due to respiratory syncytial virus |
| H0616                 | All            | Acute bronchiolitis due to other specified organisms   |
| H0617                 | All            | NULL                                                   |
| H061z                 | All            | Acute bronchiolitis NOS                                |
| H062.                 | All            | NULL                                                   |

|       |     |                                                                     |
|-------|-----|---------------------------------------------------------------------|
| H06z. | All | Acute bronchitis or bronchiolitis NOS                               |
| H06z0 | All | Chest infection (& NOS)                                             |
| H06z1 | All | Respiratory tract infection (& [acute lower] or [lower])            |
| H06z2 | All | NULL                                                                |
| H243. | All | Pertussis pneumonia                                                 |
| H30.. | All | Bronchitis: [unspecified (& chest infection)] or [recurrent wheezy] |
| H300. | All | Tracheobronchitis NOS                                               |
| H301. | All | Laryngotracheobronchitis                                            |
| H302. | All | NULL                                                                |
| H30z. | All | Bronchitis NOS                                                      |
| Hyu10 | All | [X]Acute bronchitis due to other specified organisms                |
| Hyu11 | All | [X]Acute bronchiolitis due to other specified organisms             |
| X1006 | All | Chest infection - unspecified bronchitis                            |
| X1007 | All | Acute bacterial bronchitis                                          |
| X1009 | All | Acute mycoplasmal bronchitis                                        |
| X100A | All | Acute chlamydial bronchitis                                         |
| X100B | All | Acute viral bronchitis                                              |
| X100C | All | Acute viral bronchiolitis                                           |
| X100D | All | Acute bronchiolitis due to adenovirus                               |
| Xa0IW | All | Acute laryngotracheobronchitis                                      |
| Xa0IZ | All | Asthmatic bronchitis                                                |
| XaDtB | All | Acute infective bronchitis                                          |
| XaDth | All | Acute infective tracheobronchitis                                   |
| XaYYt | All | Acute bronchiolitis due to human metapneumovirus                    |
| XE0Qw | All | Whooping cough                                                      |
| XE0Xr | All | Acute bronchitis                                                    |
| XE0YL | All | Bronchitis unspecified                                              |
| XE0Yt | All | Acute: [bronchitis] or [chest infections] or [tracheobronchitis]    |
| XM1QT | All | Acute fibrinous laryngotracheobronchitis                            |
| XM1QX | All | Acute wheezy bronchitis                                             |

**Supplementary table S5.5.** The case definitions for included influenza and cases of influenza-like illness.

| <b>Influenza</b>      |                |                                                                                |
|-----------------------|----------------|--------------------------------------------------------------------------------|
| <b>Read V2 Code</b>   | <b>Term ID</b> | <b>Description</b>                                                             |
| 16L..                 | All            | Influenza-like symptoms                                                        |
| H27..                 | All            | Influenza                                                                      |
| H270.                 | All            | Influenza with pneumonia                                                       |
| H2700                 | All            | Influenza with bronchopneumonia                                                |
| H2701                 | All            | Influenza with pneumonia, influenza virus identified                           |
| H270z                 | All            | Influenza with pneumonia NOS                                                   |
| H271.                 | All            | Influenza with other respiratory manifestation                                 |
| H2710                 | All            | Influenza with laryngitis                                                      |
| H2711                 | All            | Influenza with pharyngitis                                                     |
| H271z                 | All            | Influenza with respiratory manifestations NOS                                  |
| H27y.                 | All            | Influenza with other manifestations                                            |
| H27y0                 | All            | Influenza with encephalopathy                                                  |
| H27y1                 | All            | Influenza with gastrointestinal tract involvement                              |
| H27yz                 | All            | Influenza with other manifestations NOS                                        |
| H27z.                 | All            | Influenza NOS                                                                  |
| H2A..                 | All            | Influenza due to Influenza A virus subtype H1N1                                |
| <b>Read CTV3 Code</b> | <b>Term ID</b> | <b>Description</b>                                                             |
| 16L..                 | All            | NULL                                                                           |
| G5203                 | All            | Acute myocarditis - influenzal                                                 |
| H27..                 | All            | Influenza                                                                      |
| H270.                 | All            | Influenzal pneumonia                                                           |
| H2700                 | All            | Influenza with bronchopneumonia                                                |
| H2701                 | All            | Influenza with pneumonia, influenza virus identified                           |
| H270z                 | All            | Influenza with pneumonia NOS                                                   |
| H271.                 | All            | Influenza with other respiratory manifestation                                 |
| H2710                 | All            | Influenza with laryngitis                                                      |
| H2711                 | All            | Influenza with pharyngitis                                                     |
| H271z                 | All            | Influenza with respiratory manifestations NOS                                  |
| H27y.                 | All            | Influenza with other manifestations                                            |
| H27y0                 | All            | Influenza with encephalopathy                                                  |
| H27y1                 | All            | Influenza with gastrointestinal tract involvement                              |
| H27yz                 | All            | Influenza with other manifestations NOS                                        |
| H27z.                 | All            | (Influenza like illness) or (influenza NOS)                                    |
| H2A..                 | All            | NULL                                                                           |
| Hyu04                 | All            | [X]Influenza with other respiratory manifestations, influenza virus identified |
| Hyu05                 | All            | [X]Influenza with other manifestations, influenza virus identified             |



|       |     |                                                                          |
|-------|-----|--------------------------------------------------------------------------|
| Hyu06 | All | [X]Influenza with other respiratory manifestations, virus not identified |
| Hyu07 | All | [X]Influenza with other manifestations, virus not identified             |
| XaC1s | All | Encephalitis due to influenza                                            |
| XaC2H | All | Encephalitis due to influenza-virus identified                           |
| XaEGX | All | Encephalitis due to influenza-specific virus not identified              |
| XaeVK | All | Influenza due to zoonotic influenza virus                                |
| XaeVL | All | Influenza due to pandemic influenza virus                                |
| XaeVM | All | Influenza due to seasonal influenza virus                                |
| XaeVN | All | Influenza with pneumonia due to seasonal influenza virus                 |
| XaIBK | All | Influenza-like symptoms                                                  |
| XaMih | All | Avian influenza                                                          |
| XaQQp | All | Influenza due to Influenza A virus subtype H1N1                          |
| XE0YK | All | Influenza NOS                                                            |
| XE0ZJ | All | (Influenza NOS) or (influenza-like illness)                              |
| XM0rz | All | Influenza-like illness                                                   |
| XM0s0 | All | Flu-like illness NOS                                                     |

**Supplementary table S5.6.** The case definitions for included Skin infections.

| <b>Skin infections</b> |                |                                         |
|------------------------|----------------|-----------------------------------------|
| <b>Read V2 Code</b>    | <b>Term ID</b> | <b>Description</b>                      |
| M0...                  | All            | Skin and subcutaneous tissue infections |
| M00..                  | All            | Carbuncle                               |
| M000.                  | All            | Carbuncle of face                       |
| M0000                  | All            | Carbuncle of ear                        |
| M0001                  | All            | Carbuncle of face (excluding eye)       |
| M0002                  | All            | Carbuncle of nasal septum               |
| M0003                  | All            | Carbuncle of temple region              |
| M000z                  | All            | Carbuncle of face NOS                   |
| M001.                  | All            | Carbuncle of neck                       |
| M002.                  | All            | Carbuncle of trunk                      |
| M0020                  | All            | Carbuncle of chest wall                 |
| M0021                  | All            | Carbuncle of breast                     |
| M0022                  | All            | Carbuncle of back                       |
| M0023                  | All            | Carbuncle of abdominal wall             |
| M0024                  | All            | Carbuncle of umbilicus                  |
| M0025                  | All            | Carbuncle of flank                      |
| M0026                  | All            | Carbuncle of groin                      |
| M0027                  | All            | Carbuncle of perineum                   |
| M002z                  | All            | Carbuncle of trunk NOS                  |
| M003.                  | All            | Carbuncle of upper arm and forearm      |
| M0030                  | All            | Carbuncle of shoulder                   |
| M0031                  | All            | Carbuncle of axilla                     |
| M0032                  | All            | Carbuncle of upper arm                  |
| M0033                  | All            | Carbuncle of elbow                      |
| M0034                  | All            | Carbuncle of forearm                    |
| M003z                  | All            | Carbuncle of upper arm and forearm NOS  |
| M004.                  | All            | Carbuncle of hand                       |
| M0040                  | All            | Carbuncle of wrist                      |
| M0041                  | All            | Carbuncle of thumb                      |
| M0042                  | All            | Carbuncle of finger                     |
| M004z                  | All            | Carbuncle of hand NOS                   |
| M005.                  | All            | Carbuncle of buttock                    |
| M0050                  | All            | Carbuncle of anus                       |
| M0051                  | All            | Carbuncle of gluteal region             |
| M005z                  | All            | Carbuncle of buttock NOS                |
| M006.                  | All            | Carbuncle of leg (excluding foot)       |
| M0060                  | All            | Carbuncle of hip                        |
| M0061                  | All            | Carbuncle of thigh                      |
| M0062                  | All            | Carbuncle of knee                       |

|       |     |                                       |
|-------|-----|---------------------------------------|
| M0063 | All | Carbuncle of lower leg                |
| M0064 | All | Carbuncle of ankle                    |
| M006z | All | Carbuncle of leg (excluding foot) NOS |
| M007. | All | Carbuncle of foot                     |
| M0070 | All | Carbuncle of foot unspecified         |
| M0071 | All | Carbuncle of heel                     |
| M0072 | All | Carbuncle of toe                      |
| M007z | All | Carbuncle of foot NOS                 |
| M00y. | All | Carbuncle of other specified site     |
| M00y0 | All | Carbuncle of head (excluding face)    |
| M00yz | All | Carbuncle of other specified site NOS |
| M00z. | All | Carbuncle NOS                         |
| M01.. | All | Furuncle - boil                       |
| M010. | All | Boil of face                          |
| M0100 | All | Boil of ear                           |
| M0101 | All | Boil of face (excluding eye)          |
| M0102 | All | Boil of nasal septum                  |
| M0103 | All | Boil of temple region                 |
| M0104 | All | Boil of external nose                 |
| M010z | All | Boil of face NOS                      |
| M011. | All | Boil of neck                          |
| M012. | All | Boil of trunk                         |
| M0120 | All | Boil of chest wall                    |
| M0121 | All | Boil of breast                        |
| M0122 | All | Boil of back                          |
| M0123 | All | Boil of abdominal wall                |
| M0124 | All | Boil of umbilicus                     |
| M0125 | All | Boil of flank                         |
| M0126 | All | Boil of groin                         |
| M0127 | All | Boil of perineum                      |
| M012z | All | Boil of trunk NOS                     |
| M013. | All | Boil of upper arm and forearm         |
| M0130 | All | Boil of shoulder                      |
| M0131 | All | Boil of axilla                        |
| M0132 | All | Boil of upper arm                     |
| M0133 | All | Boil of elbow                         |
| M0134 | All | Boil of forearm                       |
| M013z | All | Boil of upper arm and forearm NOS     |
| M014. | All | Boil of hand                          |
| M0140 | All | Boil of wrist                         |
| M0141 | All | Boil of thumb                         |
| M0142 | All | Boil of finger                        |

|       |     |                                              |
|-------|-----|----------------------------------------------|
| M014z | All | Boil of hand NOS                             |
| M015. | All | Boil of buttock                              |
| M0150 | All | Boil of anus                                 |
| M0151 | All | Boil of gluteal region                       |
| M015z | All | Boil of buttock NOS                          |
| M016. | All | Boil of leg (excluding foot)                 |
| M0160 | All | Boil of hip                                  |
| M0161 | All | Boil of thigh                                |
| M0162 | All | Boil of knee                                 |
| M0163 | All | Boil of lower leg                            |
| M0164 | All | Boil of ankle                                |
| M016z | All | Boil of leg (excluding foot) NOS             |
| M017. | All | Boil of foot                                 |
| M0170 | All | Boil of foot unspecified                     |
| M0171 | All | Boil of heel                                 |
| M0172 | All | Boil of toe                                  |
| M017z | All | Boil of foot NOS                             |
| M01y. | All | Boil of other specified site                 |
| M01y0 | All | Boil of head (excluding face)                |
| M01yz | All | Boil of other specified site NOS             |
| M01z. | All | Boil NOS                                     |
| M01z0 | All | Multiple boils                               |
| M02.. | All | Cellulitis and abscess of finger and toe     |
| M020. | All | Cellulitis and abscess of finger             |
| M0200 | All | Cellulitis and abscess of finger unspecified |
| M0201 | All | Finger pulp abscess                          |
| M0202 | All | Onychia of finger                            |
| M0203 | All | Paronychia of finger                         |
| M0204 | All | Finger web space infection                   |
| M0205 | All | Pulp space infection of finger/thumb         |
| M020z | All | Cellulitis and abscess of finger NOS         |
| M021. | All | Cellulitis and abscess of toe                |
| M0210 | All | Cellulitis and abscess of toe unspecified    |
| M0211 | All | Onychia of toe                               |
| M0212 | All | Paronychia of toe                            |
| M0213 | All | Pulp space infection of toe                  |
| M021z | All | Cellulitis and abscess of toe NOS            |
| M02z. | All | Cellulitis and abscess of digit NOS          |
| M03.. | All | Other cellulitis and abscess                 |
| M030. | All | Cellulitis and abscess of face               |
| M0300 | All | Cellulitis and abscess of cheek (external)   |
| M0301 | All | Cellulitis and abscess of nose (external)    |

|       |     |                                                 |
|-------|-----|-------------------------------------------------|
| M0302 | All | Cellulitis and abscess of chin                  |
| M0303 | All | Cellulitis and abscess of submandibular region  |
| M0304 | All | Cellulitis and abscess of forehead              |
| M0305 | All | Cellulitis and abscess of temple region         |
| M0306 | All | Cellulitis of face                              |
| M030z | All | Cellulitis and abscess of face NOS              |
| M031. | All | Cellulitis and abscess of neck                  |
| M032. | All | Cellulitis and abscess of trunk                 |
| M0320 | All | Cellulitis and abscess of chest wall            |
| M0321 | All | Cellulitis and abscess of breast                |
| M0322 | All | Cellulitis and abscess of back                  |
| M0323 | All | Cellulitis and abscess of abdominal wall        |
| M0324 | All | Cellulitis and abscess of umbilicus             |
| M0325 | All | Cellulitis and abscess of flank                 |
| M0326 | All | Cellulitis and abscess of groin                 |
| M0327 | All | Cellulitis and abscess of perineum              |
| M0328 | All | Cellulitis of trunk                             |
| M032z | All | Cellulitis and abscess of trunk NOS             |
| M033. | All | Cellulitis and abscess of arm                   |
| M0330 | All | Cellulitis and abscess of shoulder              |
| M0331 | All | Cellulitis and abscess of axilla                |
| M0332 | All | Cellulitis and abscess of upper arm             |
| M0333 | All | Cellulitis and abscess of elbow                 |
| M0334 | All | Cellulitis and abscess of forearm               |
| M033z | All | Cellulitis and abscess of arm NOS               |
| M034. | All | Cellulitis and abscess of hand excluding digits |
| M0340 | All | Cellulitis and abscess of hand unspecified      |
| M0341 | All | Cellulitis and abscess of wrist                 |
| M034z | All | Cellulitis and abscess of hand NOS              |
| M035. | All | Cellulitis and abscess of buttock               |
| M036. | All | Cellulitis and abscess of leg excluding foot    |
| M0360 | All | Cellulitis and abscess of hip                   |
| M0361 | All | Cellulitis and abscess of thigh                 |
| M0362 | All | Cellulitis and abscess of knee                  |
| M0363 | All | Cellulitis and abscess of lower leg             |
| M0364 | All | Cellulitis and abscess of ankle                 |
| M036z | All | Cellulitis and abscess of leg NOS               |
| M037. | All | Cellulitis and abscess of foot excluding toe    |
| M0370 | All | Cellulitis and abscess of foot unspecified      |
| M0371 | All | Cellulitis and abscess of heel                  |
| M0372 | All | Cellulitis in diabetic foot                     |
| M037z | All | Cellulitis and abscess of foot NOS              |

|       |     |                                                        |
|-------|-----|--------------------------------------------------------|
| M038. | All | Cellulitis of external ear                             |
| M03y. | All | Other specified cellulitis and abscess                 |
| M03y0 | All | Cellulitis and abscess of head unspecified             |
| M03z. | All | Cellulitis and abscess NOS                             |
| M03z0 | All | Cellulitis NOS                                         |
| M03z1 | All | Abscess NOS                                            |
| M03zz | All | Cellulitis and abscess NOS                             |
| M04.. | All | Acute lymphadenitis                                    |
| M040. | All | Acute lymphadenitis of trunk                           |
| M041. | All | Acute lymphadenitis of upper limb                      |
| M042. | All | Acute lymphadenitis of lower limb                      |
| M043. | All | Acute lymphadenitis of face, head and neck             |
| M05.. | All | Impetigo                                               |
| M050. | All | Impetigo contagiosa unspecified                        |
| M051. | All | Impetigo contagiosa bullosa                            |
| M052. | All | Impetigo contagiosa gyrata                             |
| M053. | All | Impetigo circinata                                     |
| M054. | All | Impetigo neonatorum                                    |
| M055. | All | Impetigo simplex                                       |
| M056. | All | Impetigo follicularis                                  |
| M057. | All | Chronic symmetrical impetigo                           |
| M05z. | All | Impetigo NOS                                           |
| M06.. | All | Pilonidal sinus/cyst                                   |
| M060. | All | Pilonidal cyst with abscess                            |
| M061. | All | Pilonidal cyst with no abscess                         |
| M062. | All | Pilonidal sinus with abscess                           |
| M063. | All | Pilonidal sinus without abscess                        |
| M06z. | All | Pilonidal sinus/cyst NOS                               |
| M07.. | All | Other local infections of skin and subcutaneous tissue |
| M070. | All | Pyoderma                                               |
| M0700 | All | Pyoderma chancriforme                                  |
| M0701 | All | Pyoderma faciale                                       |
| M0702 | All | Pyoderma gangrenosum                                   |
| M0703 | All | Pyoderma ulcerosum tropicalum                          |
| M070z | All | Pyoderma NOS                                           |
| M071. | All | Pyogenic granuloma                                     |
| M0710 | All | Pyogenic granuloma unspecified                         |
| M0711 | All | Pyogenic progressive granuloma                         |
| M0712 | All | Granuloma telangiectaticum                             |
| M0713 | All | Umbilical granuloma                                    |
| M071z | All | Pyogenic granuloma NOS                                 |
| M072. | All | Erythrasma                                             |

|       |     |                                                                     |
|-------|-----|---------------------------------------------------------------------|
| M073. | All | Scalp infection                                                     |
| M07y. | All | Other specified local infection of skin or subcutaneous tissue      |
| M07y0 | All | Pustular bacterid                                                   |
| M07y1 | All | Ecthyma                                                             |
| M07y2 | All | Dermatitis vegetans                                                 |
| M07y3 | All | Perleche                                                            |
| M07y4 | All | Pitted keratolysis                                                  |
| M07y5 | All | Inflammation of scar                                                |
| M07yz | All | Other specified local infection of skin and subcutaneous tissue NOS |
| M07z. | All | Local infection skin/subcut tissue NOS                              |
| M07z0 | All | Infection foot                                                      |
| M07z1 | All | Infection toe                                                       |
| M07z2 | All | Infection finger                                                    |
| M08.. | All | Cutaneous cellulitis                                                |
| M080. | All | [X]Cellulitis of finger and toe                                     |
| M081. | All | [X]Cellulitis of other parts of limb                                |
| M082. | All | Cellulitis of face                                                  |
| M083. | All | Cellulitis of trunk                                                 |
| M084. | All | [X]Cellulitis of breast                                             |
| M085. | All | Cellulitis of leg                                                   |
| M086. | All | Cellulitis of ankle                                                 |
| M087. | All | Chronic paronychia                                                  |
| M088. | All | Cellulitis of arm                                                   |
| M089. | All | Cellulitis of neck                                                  |
| M08A. | All | Cellulitis of axilla                                                |
| M08B. | All | Cellulitis of foot                                                  |
| M08C. | All | Cellulitis of toe                                                   |
| M08y. | All | [X]Cellulitis of other sites                                        |
| M09.. | All | Cutaneous abscess                                                   |
| M090. | All | [X]Abscess of face                                                  |
| M091. | All | [X]Abscess of neck                                                  |
| M092. | All | [X]Abscess of trunk                                                 |
| M0920 | All | [X]Abscess of buttock                                               |
| M0921 | All | [X]Abdominal wall abscess                                           |
| M0922 | All | [X]Perineal abscess                                                 |
| M093. | All | [X]Abscess of buttock                                               |
| M094. | All | [X]Abscess of limb                                                  |
| M0940 | All | [X]Abscess of axilla                                                |
| M095. | All | Skin abscess                                                        |
| M09y. | All | [X]Abscess of other site                                            |
| M0y.. | All | Other specified infections of skin or subcutaneous tissue           |
| M0z.. | All | Skin and subcut tissue infection NOS                                |

| Read CTV3 Code | Term ID | Description                                                                   |
|----------------|---------|-------------------------------------------------------------------------------|
| A056.          | All     | Amoebic ulcer of skin                                                         |
| A05y1          | All     | Amoebic balanitis                                                             |
| A170.          | All     | Tuberculosis of skin & subcutaneous tissue (& tuberculous lupus)              |
| A1700          | All     | Lupus vulgaris                                                                |
| A1702          | All     | Scrofuloderma                                                                 |
| A1703          | All     | Tuberculosis - lupus NOS                                                      |
| A1706          | All     | Lichen scrofulosorum                                                          |
| A1707          | All     | Tuberculosis papulonecrotica                                                  |
| A1708          | All     | Tuberculosis verrucosa cutis                                                  |
| A170z          | All     | Tuberculosis of skin and subcutaneous tissue NOS                              |
| A171.          | All     | Tuberculous erythema nodosum                                                  |
| A1710          | All     | Erythema induratum                                                            |
| A171z          | All     | Erythema nodosum with tuberculosis NOS                                        |
| A201.          | All     | Cutaneous plague                                                              |
| A210.          | All     | Ulceroglandular tularaemia                                                    |
| A390.          | All     | (Cutaneous actinomycosis) or (erythrasma) or (trichomycosis axillaris)        |
| A394.          | All     | Madura foot - actinomycotic                                                   |
| A39z0          | All     | Maduromycosis NOS                                                             |
| A5320          | All     | Herpes zoster with dermatitis of eyelid                                       |
| A540.          | All     | Eczema herpeticum                                                             |
| A5441          | All     | Herpes simplex eyelid dermatitis                                              |
| A546.          | All     | Herpes simplex whitlow                                                        |
| A781.          | All     | Warts: [viral] or [verrucae]                                                  |
| A7810          | All     | Verruca vulgaris                                                              |
| A7811          | All     | Plantar wart                                                                  |
| A7812          | All     | (Warts: [genital] or [penile] or [venereal]) or (condylomata acuminatum)      |
| A7813          | All     | Warts: [perianal] or [anal]                                                   |
| A781z          | All     | Unspecified viral warts                                                       |
| A783.          | All     | Cat scratch disease                                                           |
| A990.          | All     | (Chancroid [& bubo]) or (Ducrey's chancre)                                    |
| A992.          | All     | (Granuloma inguinale) or (donovanosis) or (pudendal ulcer)                    |
| AA22.          | All     | Other early yaws skin lesions                                                 |
| AA23.          | All     | (Yaws hyperkeratosis) or (ghoul hand) or (wormeaten soles)                    |
| AB0..          | All     | (Dermatophytosis &/or tinea &/or ringworm) or (skin fungal infection)         |
| AB00.          | All     | (Dermatophytosis of scalp or beard) or (Kerion)                               |
| AB000          | All     | Scalp ringworm                                                                |
| AB001          | All     | Dermatophytosis of beard                                                      |
| AB00z          | All     | Dermatophytosis of scalp or beard NOS                                         |
| AB02.          | All     | Dermatophytosis of hand                                                       |
| AB03.          | All     | (Dermatophytosis of groin & perianal area) or (Dhobie itch) or (tinea cruris) |
| AB030          | All     | Dermatophytosis of groin                                                      |



|       |     |                                                                                                |
|-------|-----|------------------------------------------------------------------------------------------------|
| AB031 | All | Dermatophytosis of the perianal area                                                           |
| AB03z | All | Dermatophytosis of groin and perianal area NOS                                                 |
| AB04. | All | Dermatophytosis of foot (& tinea pedis)                                                        |
| AB05. | All | (Dermatophytosis of the body) or (herpes circinatus) or (tinea corporis)                       |
| AB06. | All | (Deep seated dermatophytosis) or (granuloma: [trichophyticum] or [Majocchi's])                 |
| AB0y. | All | Other specified dermatophytosis                                                                |
| AB0z. | All | Dermatophytosis NOS                                                                            |
| AB1.. | All | Dermatophytosis other and unspecified                                                          |
| AB10. | All | Pityriasis versicolor                                                                          |
| AB11. | All | Nigra: [tinea] or [keratomycosis]                                                              |
| AB1y. | All | Other specified dermatomycoses                                                                 |
| AB1z. | All | Dermatomycosis NOS                                                                             |
| AB230 | All | Candidal: [intertrigo] or [nappy rash] or [submammary]                                         |
| AB231 | All | Other skin candidiasis                                                                         |
| AB233 | All | Candidal paronychia                                                                            |
| AB330 | All | Coccidioidal granuloma                                                                         |
| AB500 | All | Cutaneous blastomycosis                                                                        |
| AB510 | All | Mucocutaneous-lymphangitic paracoccidioidomycosis                                              |
| AB620 | All | Cutaneous chromomycosis                                                                        |
| AB622 | All | Subcutaneous phaeohyphomycotic abscess and cyst                                                |
| AB64. | All | Mycotic: [mycetomas] or [madura foot]                                                          |
| AB640 | All | Actinomycotic mycetoma                                                                         |
| AD30. | All | (Scabies (& [Norwegian])) or (sarcoptic itch)                                                  |
| AD41. | All | (Infestation: [other arthropod] or [Chigoe] or [sand flea]) or (Jigger disease) or (Tungiasis) |
| Ayu50 | All | [X]Other early skin lesions of yaws                                                            |
| AyuH4 | All | [X]Other arthropod infestations                                                                |
| F4D10 | All | Stye                                                                                           |
| F4D4. | All | Infective eyelid dermatitis of types resulting in deformity                                    |
| F4D5. | All | Other eyelid infective dermatitis                                                              |
| F4D6. | All | Parasitic eyelid infestation                                                                   |
| F5011 | All | (Acute infective otitis externa) or (abscess external ear) or (cellulitis external ear)        |
| F5018 | All | Furunculosis of external auditory meatus                                                       |
| FyuB4 | All | [X]Parasitic infestation of eyelid in diseases classified elsewhere                            |
| FyuB5 | All | [X]Involvement of eyelid in other infectious diseases classified elsewhere                     |
| G7510 | All | Kawasaki's disease                                                                             |
| G751z | All | Acute febrile mucocutaneous lymph node syndrome NOS                                            |
| J574G | All | Perianal infection                                                                             |
| K2721 | All | Penile boil                                                                                    |
| K2722 | All | Penile carbuncle                                                                               |
| K2723 | All | Cellulitis of penis                                                                            |

|       |     |                                        |
|-------|-----|----------------------------------------|
| K2841 | All | Boil of scrotum                        |
| K2842 | All | Carbuncle of scrotum                   |
| K2843 | All | Cellulitis of scrotum                  |
| K4242 | All | Furuncle of vulva                      |
| K42y0 | All | Carbuncle of vagina                    |
| K42y1 | All | Carbuncle of labium                    |
| M0... | All | Infective dermatological disorders     |
| M00.. | All | Carbuncle                              |
| M000. | All | Carbuncle of face                      |
| M0000 | All | Carbuncle of ear                       |
| M0001 | All | Carbuncle of face (excluding eye)      |
| M0002 | All | Carbuncle of nasal septum              |
| M0003 | All | Carbuncle of temple region             |
| M000z | All | Carbuncle of face NOS                  |
| M001. | All | Carbuncle of neck                      |
| M002. | All | Carbuncle of trunk                     |
| M0020 | All | Carbuncle of chest wall                |
| M0021 | All | Carbuncle of breast                    |
| M0022 | All | Carbuncle of back                      |
| M0023 | All | Carbuncle of abdominal wall            |
| M0024 | All | Carbuncle of umbilicus                 |
| M0025 | All | Carbuncle of flank                     |
| M0026 | All | Carbuncle of groin                     |
| M0027 | All | Carbuncle of perineum                  |
| M002z | All | Carbuncle of trunk NOS                 |
| M003. | All | Carbuncle of upper arm and forearm     |
| M0030 | All | Carbuncle of shoulder                  |
| M0031 | All | Carbuncle of axilla                    |
| M0032 | All | Carbuncle of upper arm                 |
| M0033 | All | Carbuncle of elbow                     |
| M0034 | All | Carbuncle of forearm                   |
| M003z | All | Carbuncle of upper arm and forearm NOS |
| M004. | All | Carbuncle of hand                      |
| M0040 | All | Carbuncle of wrist                     |
| M0041 | All | Carbuncle of thumb                     |
| M0042 | All | Carbuncle of finger                    |
| M004z | All | Carbuncle of hand NOS                  |
| M005. | All | Carbuncle of buttock                   |
| M0050 | All | Carbuncle of anus                      |
| M0051 | All | Carbuncle of gluteal region            |
| M005z | All | Carbuncle of buttock NOS               |
| M006. | All | Carbuncle of leg (excluding foot)      |

|       |     |                                       |
|-------|-----|---------------------------------------|
| M0060 | All | Carbuncle of hip                      |
| M0061 | All | Carbuncle of thigh                    |
| M0062 | All | Carbuncle of knee                     |
| M0063 | All | Carbuncle of lower leg                |
| M0064 | All | Carbuncle of ankle                    |
| M006z | All | Carbuncle of leg (excluding foot) NOS |
| M007. | All | Carbuncle of foot                     |
| M0070 | All | Carbuncle of foot unspecified         |
| M0071 | All | Carbuncle of heel                     |
| M0072 | All | Carbuncle of toe                      |
| M007z | All | Carbuncle of foot NOS                 |
| M00y. | All | Carbuncle of other specified site     |
| M00y0 | All | Carbuncle of head (excluding face)    |
| M00yz | All | Carbuncle of other specified site NOS |
| M00z. | All | Carbuncle NOS                         |
| M01.. | All | Furuncle                              |
| M010. | All | Boil of face                          |
| M0100 | All | Boil of ear                           |
| M0101 | All | Boil of face (excluding eye)          |
| M0102 | All | Boil of nasal septum                  |
| M0103 | All | Boil of temple region                 |
| M0104 | All | Boil of external nose                 |
| M010z | All | Boil of face NOS                      |
| M011. | All | Boil of neck                          |
| M012. | All | Boil of trunk                         |
| M0120 | All | Boil of chest wall                    |
| M0121 | All | Boil of breast                        |
| M0122 | All | Boil of back                          |
| M0123 | All | Boil of abdominal wall                |
| M0124 | All | Boil of umbilicus                     |
| M0125 | All | Boil of flank                         |
| M0126 | All | Boil of groin                         |
| M0127 | All | Boil of perineum                      |
| M012z | All | Boil of trunk NOS                     |
| M013. | All | Boil of upper arm and forearm         |
| M0130 | All | Boil of shoulder                      |
| M0131 | All | Boil of axilla                        |
| M0132 | All | Boil of upper arm                     |
| M0133 | All | Boil of elbow                         |
| M0134 | All | Boil of forearm                       |
| M013z | All | Boil of upper arm and forearm NOS     |
| M014. | All | Boil of hand                          |

|       |     |                                                                                                       |
|-------|-----|-------------------------------------------------------------------------------------------------------|
| M0140 | All | Boil of wrist                                                                                         |
| M0141 | All | Boil of thumb                                                                                         |
| M0142 | All | Boil of finger                                                                                        |
| M014z | All | Boil of hand NOS                                                                                      |
| M015. | All | Boil of buttock                                                                                       |
| M0150 | All | Boil of anus                                                                                          |
| M0151 | All | Boil of gluteal region                                                                                |
| M015z | All | Boil of buttock NOS                                                                                   |
| M016. | All | Boil of leg (excluding foot)                                                                          |
| M0160 | All | Boil of hip                                                                                           |
| M0161 | All | Boil of thigh                                                                                         |
| M0162 | All | Boil of knee                                                                                          |
| M0163 | All | Boil of lower leg                                                                                     |
| M0164 | All | Boil of ankle                                                                                         |
| M016z | All | Boil of leg (excluding foot) NOS                                                                      |
| M017. | All | Boil of foot                                                                                          |
| M0170 | All | Boil of foot unspecified                                                                              |
| M0171 | All | Boil of heel                                                                                          |
| M0172 | All | Boil of toe                                                                                           |
| M017z | All | Boil of foot NOS                                                                                      |
| M01y. | All | Boil of other specified site                                                                          |
| M01y0 | All | Boil of head (excluding face)                                                                         |
| M01yz | All | Boil of other specified site NOS                                                                      |
| M01z. | All | Boils: [Recurrent] or [multiple sites] or [NOS]                                                       |
| M01z0 | All | Multiple boils                                                                                        |
| M02.. | All | Cellulitis and abscess of finger and toe                                                              |
| M020. | All | Cellulitis and abscess of finger                                                                      |
| M0200 | All | Cellulitis and abscess of finger unspecified                                                          |
| M0201 | All | (Finger pulp abscess) or (felon) or (whitlow)                                                         |
| M0202 | All | Onychia of finger                                                                                     |
| M0203 | All | Finger: [perionychia] or [paronychia]                                                                 |
| M0204 | All | Finger web space infection                                                                            |
| M0205 | All | Pulp space infection of finger/thumb                                                                  |
| M020z | All | Cellulitis and abscess of finger NOS                                                                  |
| M021. | All | Cellulitis and abscess of toe                                                                         |
| M0210 | All | Cellulitis and abscess of toe unspecified                                                             |
| M0211 | All | Onychia of toe                                                                                        |
| M0212 | All | Paronychia of toe                                                                                     |
| M0213 | All | Pulp space infection of toe                                                                           |
| M021z | All | Toe: [Perionychia] or [cellulitis and abscess NOS]                                                    |
| M02z. | All | Digit: [paronychia] or [infected nailfold] or [cellulitis and abscess of NOS] or [nail infection NOS] |

|       |     |                                                                                                                                           |
|-------|-----|-------------------------------------------------------------------------------------------------------------------------------------------|
| M03.. | All | (Skin area excluding digits of hand or foot: [abscess] or [acute lymphangitis of skin] or [cellulitis]) or (other cellulitis and abscess) |
| M030. | All | Cellulitis and abscess of face                                                                                                            |
| M0300 | All | Cellulitis and abscess of cheek (& external)                                                                                              |
| M0301 | All | Cellulitis and abscess of nose (& external)                                                                                               |
| M0302 | All | Cellulitis and abscess of chin                                                                                                            |
| M0303 | All | Cellulitis and abscess of submandibular region                                                                                            |
| M0304 | All | Cellulitis and abscess of forehead                                                                                                        |
| M0305 | All | Cellulitis and abscess of temple region                                                                                                   |
| M0306 | All | Cellulitis of face                                                                                                                        |
| M030z | All | Cellulitis and abscess of face NOS                                                                                                        |
| M031. | All | (Cellulitis and abscess of neck) or (cervical abscess)                                                                                    |
| M032. | All | Cellulitis and abscess of trunk                                                                                                           |
| M0320 | All | Cellulitis and abscess of chest wall                                                                                                      |
| M0321 | All | Cellulitis and abscess of breast                                                                                                          |
| M0322 | All | Cellulitis and abscess of back                                                                                                            |
| M0323 | All | Cellulitis and abscess of abdominal wall                                                                                                  |
| M0324 | All | Cellulitis and abscess of umbilicus                                                                                                       |
| M0325 | All | Cellulitis and abscess of flank                                                                                                           |
| M0326 | All | Cellulitis and abscess of groin                                                                                                           |
| M0327 | All | Cellulitis and abscess of perineum                                                                                                        |
| M0328 | All | Cellulitis of trunk                                                                                                                       |
| M032z | All | Cellulitis and abscess of trunk NOS                                                                                                       |
| M033. | All | Cellulitis and abscess of arm                                                                                                             |
| M0330 | All | Cellulitis and abscess of shoulder                                                                                                        |
| M0331 | All | Cellulitis and abscess of axilla                                                                                                          |
| M0332 | All | Cellulitis and abscess of upper arm                                                                                                       |
| M0333 | All | Cellulitis and abscess of elbow                                                                                                           |
| M0334 | All | Cellulitis and abscess of forearm                                                                                                         |
| M033z | All | Cellulitis and abscess of arm NOS                                                                                                         |
| M034. | All | Cellulitis and abscess of hand (& excluding digits)                                                                                       |
| M0340 | All | Hand: (abscess and/or cellulitis) of (dorsum or palm or unspecified)                                                                      |
| M0341 | All | Cellulitis and abscess of wrist                                                                                                           |
| M034z | All | Cellulitis and abscess of hand NOS                                                                                                        |
| M035. | All | Cellulitis and abscess of buttock                                                                                                         |
| M036. | All | Cellulitis and abscess of leg (& excluding foot)                                                                                          |
| M0360 | All | Cellulitis and abscess of hip                                                                                                             |
| M0361 | All | Cellulitis and abscess of thigh                                                                                                           |
| M0362 | All | Cellulitis and abscess of knee                                                                                                            |
| M0363 | All | Cellulitis and abscess of lower leg                                                                                                       |
| M0364 | All | Cellulitis and abscess of ankle                                                                                                           |
| M036z | All | Cellulitis and abscess of leg NOS                                                                                                         |
| M037. | All | Cellulitis and abscess of foot (& excluding toe)                                                                                          |

|       |     |                                                                       |
|-------|-----|-----------------------------------------------------------------------|
| M0370 | All | Cellulitis and abscess of foot unspecified                            |
| M0371 | All | Cellulitis and abscess of heel                                        |
| M0372 | All | Cellulitis in diabetic foot                                           |
| M037z | All | Cellulitis and abscess of foot NOS                                    |
| M038. | All | NULL                                                                  |
| M03y. | All | Other specified cellulitis and abscess                                |
| M03y0 | All | (Cellulitis and abscess of head unspecified) or (abscess of scalp)    |
| M03z. | All | Cellulitis and abscess NOS                                            |
| M03z0 | All | Cellulitis NOS                                                        |
| M03z1 | All | Abscess NOS                                                           |
| M03zz | All | (Cellulitis and abscess NOS) or (acute lymphangitis NOS)              |
| M04.. | All | Acute: [lymphadenitis] or [abscess lymph node] or [cervical adenitis] |
| M040. | All | Acute lymphadenitis of trunk                                          |
| M041. | All | Acute lymphadenitis of upper limb                                     |
| M042. | All | Acute lymphadenitis of lower limb                                     |
| M043. | All | Acute lymphadenitis of face, head and neck                            |
| M05.. | All | Impetigo                                                              |
| M050. | All | Impetigo contagiosa unspecified                                       |
| M051. | All | [Bullous impetigo] or [impetigo herpetiformis]                        |
| M052. | All | Impetigo contagiosa gyrata                                            |
| M053. | All | Impetigo circinata                                                    |
| M054. | All | Impetigo neonatorum                                                   |
| M055. | All | Impetigo simplex                                                      |
| M056. | All | Impetigo follicularis                                                 |
| M057. | All | Chronic symmetrical impetigo                                          |
| M05z. | All | Impetigo NOS                                                          |
| M06.. | All | Pilonidal sinus/cyst                                                  |
| M060. | All | Pilonidal cyst with abscess                                           |
| M061. | All | (Pilonidal cyst with no abscess) or (dermal sinus)                    |
| M062. | All | Pilonidal sinus with abscess                                          |
| M063. | All | Pilonidal sinus without abscess                                       |
| M06z. | All | Pilonidal sinus/cyst NOS                                              |
| M07.. | All | Other local infections of skin and subcutaneous tissue                |
| M070. | All | Pyogenic infection of skin and subcutis                               |
| M0700 | All | Chancriform pyoderma                                                  |
| M0701 | All | Pyoderma faciale                                                      |
| M0702 | All | Pyoderma gangrenosum                                                  |
| M0703 | All | Pyoderma ulcerosum tropicalum                                         |
| M070z | All | Pyoderma NOS                                                          |
| M071. | All | Pyogenic granuloma                                                    |
| M0710 | All | Pyogenic granuloma unspecified                                        |
| M0711 | All | Pyogenic progressive granuloma                                        |

|       |     |                                                                                                                                          |
|-------|-----|------------------------------------------------------------------------------------------------------------------------------------------|
| M0712 | All | NULL                                                                                                                                     |
| M0713 | All | Umbilical granuloma                                                                                                                      |
| M071z | All | Pyogenic granuloma NOS                                                                                                                   |
| M072. | All | NULL                                                                                                                                     |
| M073. | All | Scalp infection                                                                                                                          |
| M07y. | All | (Pustular eczema) or (other specified local infection of skin or subcutaneous tissue)                                                    |
| M07y0 | All | Acute palmoplantar pustular psoriasis                                                                                                    |
| M07y1 | All | Ecthyma                                                                                                                                  |
| M07y2 | All | Dermatitis vegetans                                                                                                                      |
| M07y3 | All | NULL                                                                                                                                     |
| M07y4 | All | NULL                                                                                                                                     |
| M07y5 | All | Inflammation of scar                                                                                                                     |
| M07yz | All | Infection: [toe] or [foot] or [finger] or [other specified local infection of skin and subcutaneous tissue NOS]                          |
| M07z. | All | (Septic spots) or (sinus) or (infected skin: [insect bite] or [ulcer] or [dermatitis] or [local infection skin/subcutaneous tissue NOS]) |
| M07z0 | All | NULL                                                                                                                                     |
| M07z1 | All | NULL                                                                                                                                     |
| M07z2 | All | NULL                                                                                                                                     |
| M08.. | All | NULL                                                                                                                                     |
| M080. | All | (Cellulitis: [of thumb] or [[X] of finger and toe]) or (nail bed infection) or (septic thumb)                                            |
| M081. | All | [X]Cellulitis of other parts limb                                                                                                        |
| M082. | All | NULL                                                                                                                                     |
| M083. | All | NULL                                                                                                                                     |
| M084. | All | [X]Cellulitis of breast                                                                                                                  |
| M085. | All | NULL                                                                                                                                     |
| M086. | All | Cellulitis of ankle                                                                                                                      |
| M087. | All | Chronic paronychia                                                                                                                       |
| M088. | All | NULL                                                                                                                                     |
| M089. | All | NULL                                                                                                                                     |
| M08A. | All | NULL                                                                                                                                     |
| M08B. | All | NULL                                                                                                                                     |
| M08C. | All | NULL                                                                                                                                     |
| M08y. | All | [X]Cellulitis of other sites                                                                                                             |
| M09.. | All | NULL                                                                                                                                     |
| M090. | All | Abscess of face                                                                                                                          |
| M091. | All | Abscess of neck                                                                                                                          |
| M092. | All | Abscess of trunk                                                                                                                         |
| M0920 | All | NULL                                                                                                                                     |
| M0921 | All | NULL                                                                                                                                     |
| M0922 | All | NULL                                                                                                                                     |
| M093. | All | Abscess of buttock                                                                                                                       |

|       |     |                                                                                                                                             |
|-------|-----|---------------------------------------------------------------------------------------------------------------------------------------------|
| M094. | All | Abscess of limb                                                                                                                             |
| M0940 | All | NULL                                                                                                                                        |
| M095. | All | NULL                                                                                                                                        |
| M09y. | All | [X]Abscess of other site                                                                                                                    |
| M0y.. | All | Other specified infections of skin or subcutaneous tissue                                                                                   |
| M0z.. | All | Infected: [sebaceous cyst] or [skin and subcut tissue NOS]<br>[Infective eczematoid dermatitis] or [Pustular eczema] or [Septic dermatitis] |
| M102. | All |                                                                                                                                             |
| M1512 | All | Erythema marginatum                                                                                                                         |
| M15y0 | All | Staphylococcal scalded skin syndrome                                                                                                        |
| M15y6 | All | Erythema marginatum in acute rheumatic fever                                                                                                |
| M161A | All | Psoriasis palmaris                                                                                                                          |
| M161B | All | Psoriasis plantaris                                                                                                                         |
| M163. | All | Pityriasis rosea                                                                                                                            |
| M21y0 | All | Acrodermatitis chronica atrophicans                                                                                                         |
| M2440 | All | Dissecting cellulitis of scalp                                                                                                              |
| M2441 | All | Sycosis barbae                                                                                                                              |
| M2442 | All | Folliculitis depilans                                                                                                                       |
| M2443 | All | Pustular folliculitis                                                                                                                       |
| M2444 | All | Perifolliculitis                                                                                                                            |
| M2446 | All | Deep bacterial folliculitis                                                                                                                 |
| M2447 | All | Perifolliculitis of scalp                                                                                                                   |
| M244z | All | Folliculitis NOS                                                                                                                            |
| Myu0. | All | [X]Infections of the skin and subcutaneous tissue                                                                                           |
| Myu01 | All | [X]Other specified local infections of the skin and subcutaneous tissue                                                                     |
| Myu02 | All | [X]Impetiginisation of other dermatoses                                                                                                     |
| SP30. | All | Generalised vaccinia                                                                                                                        |
| X00hk | All | Cellulitis of external ear                                                                                                                  |
| X00hm | All | Cellulitis of pinna                                                                                                                         |
| X00hn | All | Abscess of pinna                                                                                                                            |
| X00IR | All | Lupus vulgaris of nose                                                                                                                      |
| X00YN | All | Cellulitis of eyelid                                                                                                                        |
| X00YS | All | Infectious dermatosis of eyelid                                                                                                             |
| X00YT | All | Bacterial dermatitis of eyelid                                                                                                              |
| X00YU | All | Impetigo of eyelid                                                                                                                          |
| X00YV | All | Viral dermatitis of eyelid                                                                                                                  |
| X00YW | All | Fungal dermatitis of eyelid                                                                                                                 |
| X20QY | All | Cancrum oris                                                                                                                                |
| X4004 | All | Gangrenous balanitis                                                                                                                        |
| X400A | All | Mycoplasma balanitis                                                                                                                        |
| X400B | All | Chlamydial balanitis                                                                                                                        |
| X400w | All | Fournier's gangrene of scrotum                                                                                                              |
| X4087 | All | Vulval amoebiasis                                                                                                                           |



|       |     |                                                          |
|-------|-----|----------------------------------------------------------|
| X4089 | All | Chlamydial Bartholinitis                                 |
| X408C | All | Vulval warts                                             |
| X408D | All | Condyloma acuminata of vulva                             |
| X5002 | All | Viral dermatological disorders                           |
| X5003 | All | Pox virus infection of skin                              |
| X5004 | All | Vaccinia                                                 |
| X5005 | All | Eczema vaccinatum                                        |
| X5006 | All | Viral exanthem                                           |
| X5007 | All | Infectious mononucleosis exanthem                        |
| X500A | All | Dermatosis of suspected viral aetiology                  |
| X500b | All | Pseudomonas aeruginosa paronychia                        |
| X500B | All | Gianotti-Crosti syndrome                                 |
| X500E | All | Chlamydial dermatological disorders                      |
| X500f | All | Recurrent boils                                          |
| X500g | All | Boils of multiple sites                                  |
| X500I | All | Exanthem due to ornithosis                               |
| X500J | All | Bacterial dermatological disorders                       |
| X500K | All | Non-bullous impetigo                                     |
| X500L | All | Streptococcal impetigo                                   |
| X500M | All | Staphylococcal non-bullous impetigo                      |
| X500N | All | Secondary impetiginisation                               |
| X500O | All | Scalp folliculitis                                       |
| X500P | All | Staphylococcal folliculitis of scalp                     |
| X500q | All | Ecthyma gangrenosum                                      |
| X500Q | All | Gram-negative folliculitis                               |
| X500r | All | Sycosis                                                  |
| X500R | All | Staphylococcal granuloma                                 |
| X500s | All | Acute sycosis barbae                                     |
| X500t | All | Sycosis cruris                                           |
| X500u | All | Lupoid sycosis                                           |
| X500U | All | Abscess of skin                                          |
| X500v | All | Lupoid sycosis of beard                                  |
| X500V | All | Cervical abscess                                         |
| X500w | All | Folliculitis decalvans                                   |
| X500W | All | Abscess of skin area excluding digits of hand or foot    |
| X500x | All | Folliculitis keloidalis nuchae                           |
| X500X | All | Abscess of dorsum of hand                                |
| X500y | All | Chronic folliculitis of legs                             |
| X500Y | All | Abscess of palm of hand                                  |
| X500z | All | Cutaneous cellulitis                                     |
| X500Z | All | Abscess of scalp                                         |
| X5010 | All | Cellulitis of skin area excluding digits of hand or foot |

|       |     |                                                             |
|-------|-----|-------------------------------------------------------------|
| X5011 | All | Cellulitis of dorsum of hand                                |
| X5012 | All | Cellulitis of palm of hand                                  |
| X5013 | All | Necrotising fasciitis                                       |
| X5014 | All | Necrotising fasciitis of scrotum and perineum               |
| X5015 | All | Progressive bacterial synergistic gangrene                  |
| X5018 | All | Anaerobic cellulitis                                        |
| X501b | All | Non-pyogenic bacterial infection of skin                    |
| X501c | All | Erythrasma                                                  |
| X501d | All | Pitted keratolysis                                          |
| X501E | All | Cellulitis of leg                                           |
| X501G | All | Acute lymphangitis NOS                                      |
| X501H | All | Acute lymphangitis of skin excluding digits of hand or foot |
| X501I | All | Acute cervical adenitis                                     |
| X501J | All | Site-specific pyogenic infection of skin and subcutis       |
| X501N | All | Blistering distal dactylitis                                |
| X501O | All | Infection of nail                                           |
| X501Q | All | Infection of toe web                                        |
| X501r | All | Cutaneous involvement in listeriosis                        |
| X501R | All | Staphylococcal intertrigo                                   |
| X501S | All | Streptococcal intertrigo                                    |
| X501t | All | Fusobacterium infection of skin                             |
| X501U | All | Perianal streptococcal infection of newborn                 |
| X501v | All | Tropical ulcer                                              |
| X501V | All | Botryomycosis                                               |
| X501w | All | Desert sore                                                 |
| X501W | All | Staphylococcal botryomycosis                                |
| X501x | All | Corynebacterium pyogenes infection of skin                  |
| X501X | All | Cutaneous botryomycosis                                     |
| X501Z | All | Dermatitis gangrenosa infantum                              |
| X5020 | All | Moraxella infection of skin                                 |
| X5021 | All | Staphylococcal scarlatina                                   |
| X502a | All | Primary cutaneous blastomycosis                             |
| X502A | All | Tuberculide                                                 |
| X502B | All | Papular tuberculide                                         |
| X502E | All | Nodular tuberculide                                         |
| X502H | All | Cutaneous complication of BCG immunisation                  |
| X502I | All | BCG granuloma                                               |
| X502j | All | Chromomycosis                                               |
| X502J | All | BCG ulcer                                                   |
| X502I | All | Subcutaneous zygomycosis                                    |
| X502o | All | Systemic fungal infection affecting skin                    |
| X502p | All | Dermatophytide                                              |

|       |     |                                                |
|-------|-----|------------------------------------------------|
| X502P | All | Pityrosporum infection of skin                 |
| X502q | All | Trichophytide                                  |
| X502Q | All | Pityrosporum folliculitis                      |
| X502r | All | Microsporide                                   |
| X502R | All | Steroid-modified tinea infection               |
| X502s | All | Epidermophytide                                |
| X502t | All | Parasitic infestation of skin                  |
| X502u | All | Nematode infestation of skin                   |
| X502U | All | Cutaneous alternariosis                        |
| X502v | All | Streptocerciasis                               |
| X502V | All | Scytalidium dimidiatum infection of skin       |
| X502W | All | Scytalidium hyalinum infection of skin         |
| X502Y | All | Systemic mycosis affecting skin                |
| X5031 | All | Amoebiasis of skin                             |
| X5038 | All | Protozoal infestation of skin                  |
| X503J | All | Maculae ceruleae - disorder                    |
| X509H | All | Nail infection NOS                             |
| X509m | All | Erosive pustular dermatosis of the scalp       |
| X50BW | All | Infected skin ulcer                            |
| X50Dw | All | Eosinophilic panniculitis                      |
| X50FB | All | Eosinophilic cellulitis                        |
| X50GV | All | Bullous pyoderma                               |
| X70HA | All | Tuberculous chancre                            |
| X70HB | All | Acute tuberculous ulcer                        |
| X70HC | All | Acute miliary cutaneous tuberculosis           |
| X70HD | All | Cutaneous tuberculous gumma                    |
| X70Hy | All | Cutaneous mycobacterium ulcerans infection     |
| X70Hz | All | Cutaneous mycobacterium marinum infection      |
| X70IO | All | Swimming pool granuloma                        |
| X70I1 | All | Fish tank granuloma                            |
| X70IA | All | Cutaneous streptococcal ulcer                  |
| X70IS | All | Gas gangrene of skin                           |
| X70JO | All | Herpes simplex infection of skin               |
| X70JP | All | Chronic mucocutaneous herpes simplex infection |
| X70Lc | All | Giant condyloma acuminata                      |
| X70LO | All | Facial wart                                    |
| X70LP | All | Hand wart                                      |
| X70LQ | All | Periungual wart                                |
| X70LR | All | Subungual wart                                 |
| X70LS | All | Filiform wart                                  |
| X70LT | All | Digitate wart                                  |
| X70LU | All | Butcher's wart                                 |

|       |     |                                  |
|-------|-----|----------------------------------|
| X70LV | All | Plane wart                       |
| X70LW | All | Mosaic plantar wart              |
| X70LX | All | Myrmecia plantar wart            |
| X70LY | All | Epidermodysplasia verruciformis  |
| X70LZ | All | Anogenital warts                 |
| X70N8 | All | Cutaneous gonorrhoea             |
| X70N9 | All | Gonococcal cellulitis            |
| X70NB | All | Chancroid - anogenital ulcer     |
| X70NC | All | Chancroid - extragenital ulcer   |
| X70Nd | All | Anal warts                       |
| X70ND | All | Chancroid - latent infection     |
| X70Nf | All | Penile warts                     |
| X70Nt | All | Donovanosis - anogenital ulcer   |
| X70Nu | All | Donovanosis - inguinal lesion    |
| X70Nv | All | Donovanosis - non-genital lesion |
| X70OR | All | Bacillary angiomatosis           |
| X70Pi | All | Leptospiral rash                 |
| X70PJ | All | Penile amoebiasis                |
| X70PL | All | Amoebic abscess of skin          |
| X70Pn | All | Plantar papillomata of yaws      |
| X70Po | All | Palmar papillomata of yaws       |
| X70Pp | All | Macular yaws                     |
| X70Pq | All | Maculopapular yaws               |
| X70Pr | All | Micropapular yaws                |
| X70Ps | All | Papular yaws                     |
| X70Pt | All | Palmar yaws hyperkeratosis       |
| X70Pu | All | Plantar yaws hyperkeratosis      |
| X70PY | All | Erythema chronicum migrans       |
| X70Qe | All | Cutaneous aspergillosis          |
| X70QJ | All | Fungal dermatosis                |
| X70QK | All | Mycetoma                         |
| X70QM | All | Kerion                           |
| X70QN | All | Favus                            |
| X70QO | All | Tinea faciei                     |
| X70Qp | All | Perineal candidiasis             |
| X70QP | All | Tinea cruris                     |
| X70QQ | All | Nodular folliculitis             |
| X70Qr | All | Candidiasis of skin              |
| X70QR | All | Trichomycosis axillaris          |
| X70Qs | All | Napkin candidiasis               |
| X70QS | All | Tinea imbricata                  |
| X70Qt | All | Submammary intertrigo            |

|       |     |                                          |
|-------|-----|------------------------------------------|
| X70Qu | All | Candidiasis of finger web                |
| X70Rc | All | Cutaneous histoplasmosis                 |
| X70Rd | All | Primary cutaneous histoplasmosis         |
| X70RD | All | Cutaneous cryptococcosis                 |
| X70Re | All | Disseminated cutaneous histoplasmosis    |
| X70RG | All | Cutaneous coccidioidomycosis             |
| X70Rh | All | Disseminated cutaneous blastomycosis     |
| X70RH | All | Subcutaneous coccidioidomycosis          |
| X70Rj | All | Cutaneous lobomycosis                    |
| X70Rk | All | Primary lobomycotic nodule               |
| X70RI | All | Chronic coalescent cutaneous lobomycosis |
| X70Rw | All | Cutaneous trichosporonosis               |
| X70Rz | All | Cutaneous chromoblastomycosis            |
| X70S0 | All | Primary chromoblastomycotic nodule       |
| X70S1 | All | Cutaneous chromoblastomycotic abscess    |
| X70S2 | All | Lymphocutaneous chromoblastomycosis      |
| X70S5 | All | Phaeohyphomycosis of skin                |
| X70S6 | All | Phaeohyphomycotic subcutaneous cyst      |
| X70SK | All | Conidiobolomycosis                       |
| X70SL | All | Rhinofacial conidiobolomycosis           |
| X70SM | All | Disseminated conidiobolomycosis          |
| X70SO | All | Cutaneous basidiobolomycosis             |
| X70Tk | All | Onchodermatitis                          |
| X70Tm | All | Onchocercal subcutaneous nodule          |
| X70Tn | All | Onchocercal depigmentation               |
| X70To | All | Onchocercal lichenification              |
| X70Tp | All | Sowda                                    |
| X70UA | All | Cutaneous strongyloidiasis               |
| X70UB | All | Strongyloidal ground itch                |
| X70UC | All | Strongyloidal cutaneous larva migrans    |
| X70UD | All | Larva currens                            |
| X70UJ | All | Gnathostomal cutaneous larva migrans     |
| X70Ut | All | Scabetic nodule                          |
| X70Uu | All | Post-scabetic nodule                     |
| X70Uv | All | Crusted scabies                          |
| X70Uy | All | Arthropod dermatosis                     |
| X70Uz | All | Dermatosis due to mites                  |
| X70V0 | All | Grocer's itch                            |
| X70V1 | All | Baker's itch                             |
| X70V2 | All | Copra itch                               |
| X70V3 | All | Straw itch                               |
| X70V4 | All | Grain itch                               |

|       |     |                                                |
|-------|-----|------------------------------------------------|
| X70V5 | All | Grain-shoveller's itch                         |
| X70V6 | All | Cotton-seed itch                               |
| X70V7 | All | Bean itch                                      |
| X70V8 | All | Barley itch                                    |
| X70V9 | All | Demodex folliculitis                           |
| X70VA | All | Dermatophagoidal dermatosis                    |
| X70VB | All | Animal mite infestation                        |
| X70VC | All | Cheyletiella dermatitis                        |
| X70VD | All | Dog mite infestation                           |
| X70VE | All | Cat mite infestation                           |
| X70VF | All | Rabbit mite infestation                        |
| X70VG | All | Rat mite infestation                           |
| X70VH | All | Mouse mite infestation                         |
| X70VI | All | Bird mite infestation                          |
| X70VK | All | Fowl mite infestation                          |
| X70VL | All | Chiggers infestation                           |
| X70VM | All | Dermatoses due to plant mites                  |
| X70VN | All | Dermatosis due to bug                          |
| X70VQ | All | Flea infestation                               |
| X70VR | All | Jiggers infestation                            |
| X70VS | All | Tongueworm infection                           |
| X70VT | All | Tongueworm cyst                                |
| X70VU | All | Tongueworm granuloma                           |
| X70VV | All | Halzoun                                        |
| X75vf | All | Paronychia                                     |
| X75vg | All | Bacterial paronychia                           |
| X75wp | All | Folliculitis of lids                           |
| X78Rn | All | Infected sebaceous cyst                        |
| X78Rs | All | Warty dyskeratoma                              |
| XA00w | All | Infected insect bite                           |
| Xa0Aq | All | Neonatal pyoderma                              |
| Xa0bE | All | Streptococcal cellulitis                       |
| Xa0bF | All | Meleney's gangrene                             |
| Xa0bG | All | Cutaneous African histoplasmosis               |
| Xa0bI | All | Larva migrans of skin                          |
| Xa0kT | All | Amoebic granuloma of skin                      |
| Xa0Qy | All | Complicated donovanosis                        |
| Xa0Ws | All | Staphylococcus aureus superficial folliculitis |
| Xa139 | All | Site-specific infective disorders of skin      |
| Xa13A | All | Intertrigo                                     |
| Xa13C | All | Submammary monilia                             |
| Xa1y2 | All | Abscess of toe                                 |

|       |     |                                            |
|-------|-----|--------------------------------------------|
| Xa1ZW | All | Cutaneous disorders of Yaws                |
| Xa2jn | All | Cellulitis of arm                          |
| Xa3gD | All | Carbuncle/boil                             |
| Xa3gE | All | Cellulitis of toe                          |
| Xa3gF | All | Cellulitis of hand excluding finger        |
| Xa3gG | All | Cellulitis of leg, excluding foot          |
| Xa3gH | All | Cellulitis of foot excluding toe           |
| Xa40b | All | Cellulitis - digit NOS                     |
| Xa6qC | All | Perineal wart                              |
| Xa6qD | All | Female perineal wart                       |
| Xa7Ht | All | Cellulitis of heel                         |
| Xa7Hw | All | Axillary abscess                           |
| Xa7I2 | All | Periorbital cellulitis                     |
| Xa7Ic | All | Infected nail bed                          |
| Xa7Id | All | Cellulitis of scalp                        |
| Xa7Iv | All | Infected face                              |
| Xa7Iz | All | Infected heel                              |
| Xa7m0 | All | Infected thumb                             |
| Xa7m3 | All | Septic finger                              |
| Xa7m4 | All | Infected hand                              |
| Xa7nf | All | Intertrigo of abdominal skin fold          |
| Xa7Ni | All | Infection toe                              |
| Xa7Nj | All | Infection foot                             |
| Xa7Nk | All | Infection finger                           |
| Xa7yw | All | Abscess of finger                          |
| Xa82g | All | Perineal abscess                           |
| Xa83I | All | Cellulitis of elbow                        |
| Xa83m | All | Abscess of elbow                           |
| Xa83W | All | Abscess of foot                            |
| Xa85W | All | Loin abscess                               |
| Xa86C | All | Cellulitis of abdominal wall               |
| Xa89z | All | Boil of lower limb                         |
| Xa8A1 | All | Carbuncle of upper limb                    |
| Xa8A4 | All | Carbuncle of lower limb                    |
| Xa97f | All | Anogenital human papilloma virus infection |
| Xa97i | All | Early yaws skin lesion                     |
| Xa97k | All | Tinea pedis                                |
| Xa97I | All | Ringworm of body                           |
| Xa9CU | All | Pilonidal abscess                          |
| Xa9CY | All | Hidradenitis suppurativa                   |
| Xa9zj | All | Abscess of ankle                           |
| Xaa9L | All | Recurrent genital warts                    |

|       |     |                                            |
|-------|-----|--------------------------------------------|
| XaB64 | All | Cellulitis - anus or rectum                |
| XaB65 | All | Perianal cellulitis                        |
| XaBDy | All | Cellulitis of axilla                       |
| XaBEE | All | Cellulitis of neck                         |
| XaBj5 | All | Abscess of back                            |
| XaBkZ | All | Groin abscess                              |
| XaBmh | All | Cellulitis of skin of back                 |
| XaBsM | All | Infection of big toe                       |
| XaBXe | All | Abdominal wall abscess                     |
| XaBXh | All | Abscess of big toe                         |
| XaBXi | All | Abscess of cheek                           |
| XaBXj | All | Abscess of thigh                           |
| XaBXk | All | Abscess of forehead                        |
| XaDbx | All | Toxocara larva migrans of skin             |
| XaEGL | All | Hand warts                                 |
| XaEJd | All | Prepatellar abscess                        |
| XaF8F | All | Preseptal cellulitis                       |
| XaFCr | All | Cellulitis of thigh                        |
| XaI8d | All | Abscess of lower limb                      |
| XaI8e | All | Abscess of upper limb                      |
| XaINT | All | Blind boil                                 |
| XaLWv | All | Nasal furuncle                             |
| XaMgL | All | [X]Vulval warts                            |
| XaMgM | All | [X]Perineal warts                          |
| XaR2I | All | Recurrent cellulitis                       |
| XaY4a | All | Pustular eczema                            |
| XaY4o | All | Infected eczema                            |
| XaY4Z | All | Infective eczematoid dermatitis            |
| XaYO5 | All | Cellulitis of thumb                        |
| XaYOq | All | Bullous impetigo                           |
| XaYRx | All | Bullous staphylococcal impetigo            |
| XE0aH | All | Angular cheilitis                          |
| XE0eV | All | Carbuncle of vulva                         |
| XE0RS | All | Human papilloma virus infection of skin    |
| XE0RT | All | Genital warts                              |
| XE0RU | All | Perianal warts                             |
| XE0S1 | All | Chancroid                                  |
| XE0S2 | All | Donovanosis                                |
| XE0S7 | All | Yaws hyperkeratosis                        |
| XE0S9 | All | Dermatophytosis                            |
| XE0SA | All | Dermatophytosis of scalp or beard          |
| XE0SC | All | Dermatophytosis of groin and perianal area |



|       |     |                                                                     |
|-------|-----|---------------------------------------------------------------------|
| XE0SD | All | Dermatophytosis of the body                                         |
| XE0Se | All | Scabies                                                             |
| XE0SE | All | Deep seated dermatophytosis                                         |
| XE0SF | All | Tinea nigra                                                         |
| XE0Sg | All | Other arthropod infestation                                         |
| XE0SK | All | Candida intertrigo                                                  |
| XE0SP | All | Eumycetoma                                                          |
| XE0TC | All | (Actinomycosis (& [infections]) or (erythrasma)                     |
| XE0Te | All | Viral warts (& [condyloma acuminatum])                              |
| XE0Tg | All | Other viral warts                                                   |
| XE0UC | All | (Tinea: [groin/perianal] or [cruris]) or (Dhobie itch)              |
| XE16h | All | Abscess of eyelid                                                   |
| XE1Aa | All | Cellulitis and abscess of leg                                       |
| XE1Ab | All | Cellulitis and abscess of foot excluding toe                        |
| XE1Ac | All | Cellulitis and abscess of head unspecified                          |
| XE1Ad | All | Acute lymphadenitis                                                 |
| XE1Ae | All | Pilonidal cyst with no abscess                                      |
| XE1Ag | All | Other specified local infection of skin or subcutaneous tissue      |
| XE1Ai | All | Other specified local infection of skin and subcutaneous tissue NOS |
| XE1Aj | All | Local infection skin/subcut tissue NOS                              |
| XE1Ak | All | [X]Cellulitis of finger and toe                                     |
| XE1Al | All | Skin and subcut tissue infection NOS                                |
| XE1AO | All | Boil of upper limb                                                  |
| XE1AP | All | Boil NOS                                                            |
| XE1AQ | All | Finger pulp abscess                                                 |
| XE1AR | All | Paronychia of finger                                                |
| XE1AS | All | Cellulitis and abscess of toe NOS                                   |
| XE1AT | All | Cellulitis and abscess of digit NOS                                 |
| XE1AU | All | Other cellulitis and abscess                                        |
| XE1AV | All | Cellulitis and abscess of cheek (external)                          |
| XE1AW | All | Cellulitis and abscess of nose (external)                           |
| XE1AX | All | Cellulitis and abscess of neck                                      |
| XE1AY | All | Cellulitis and abscess of hand excluding digits                     |
| XE1AZ | All | Cellulitis and abscess of hand unspecified                          |
| XE1Bc | All | (Carbuncle) &/or (boil) or (furuncle)                               |
| XE1Be | All | Boil: (face) or (external auditory) or (external ear)               |
| XE1Bg | All | (Boil - upper arm and forearm) or (axillary furunculosis)           |
| XE1Bi | All | (Cellulitis &/or abscess finger/toe) or (felon - whitlow)           |
| XE1BJ | All | Superficial folliculitis                                            |
| XE1Bk | All | (Cellulitis - finger-paronychia) or (paronychia)                    |
| XE1Bm | All | (Cellulitis/abscess: [NOS] or [other]) or (abscess NOS)             |
| XE1Bo | All | (Cellulitis/abscess - face) or (cellulitis - lips)                  |

|       |     |                                                                       |
|-------|-----|-----------------------------------------------------------------------|
| XE1Bq | All | Cellulitis -hand (& -excl. finger)                                    |
| XE1Bs | All | Cellulitis (&/or abscess): [buttock] or [perirectal]                  |
| XE1Bu | All | Cellulitis - foot (& - excl. toe)                                     |
| XE1Bw | All | (Impetigo) or (pemphigus neonatorum)                                  |
| XE1By | All | (Pilonidal: [sinus &/or cyst] or [abscess]) or (dimple - parasacral)  |
| XE1C0 | All | (Skin infection, localised NOS) or (pyoderma) or (pyogenic granuloma) |
| XE1C2 | All | (Skin infections NOS) or (perleche)                                   |
| XE1Cq | All | Folliculitis                                                          |
| XE2RI | All | Toe: [cellulitis] or [paronychia]                                     |
| XE2uC | All | Tuberculosis of skin and subcutaneous tissue                          |
| XE2uM | All | Dermatophytosis of foot                                               |
| XE2v1 | All | Multiple yaws papillomata                                             |
| XE2xh | All | Phthiriasis pubis                                                     |
| XM0pU | All | Tinea kerion of beard                                                 |
| XM0tp | All | Cellulitis of hand                                                    |
| XM0tr | All | Cellulitis of foot                                                    |
| XM1PT | All | Superficial bacterial infection of skin                               |
| XM1R0 | All | Acute abscess lymph node                                              |
| XSBpB | All | Abscess of hand                                                       |

**Supplementary table S5.7.** The case definitions for included Urinary tract infection.

| <b>Urinary tract infection</b> |                |                                             |
|--------------------------------|----------------|---------------------------------------------|
| <b>Read V2 Code</b>            | <b>Term ID</b> | <b>Description</b>                          |
| K15..                          | All            | Cystitis                                    |
| K150.                          | All            | Acute cystitis                              |
| K151.                          | All            | Chronic interstitial cystitis               |
| K1510                          | All            | Hunner's ulcer                              |
| K1511                          | All            | Panmural fibrosis of bladder                |
| K1512                          | All            | Submucous cystitis                          |
| K151z                          | All            | Chronic interstitial cystitis NOS           |
| K152.                          | All            | Other chronic cystitis                      |
| K1520                          | All            | Subacute cystitis                           |
| K152y                          | All            | Chronic cystitis unspecified                |
| K152z                          | All            | Other chronic cystitis NOS                  |
| K153.                          | All            | Trigonitis                                  |
| K1530                          | All            | Acute trigonitis                            |
| K1531                          | All            | Chronic trigonitis                          |
| K1532                          | All            | Urethrotigonitis                            |
| K153z                          | All            | Trigonitis NOS                              |
| K154.                          | All            | Cystitis in diseases EC                     |
| K1540                          | All            | Cystitis in actinomycosis                   |
| K1541                          | All            | Cystitis in amoebiasis                      |
| K1542                          | All            | Cystitis in bilharziasis                    |
| K1543                          | All            | Cystitis in echinococcus infestation        |
| K1544                          | All            | Cystitis in diphtheria                      |
| K1545                          | All            | Cystitis in gonorrhoea                      |
| K1546                          | All            | Cystitis in moniliasis                      |
| K1547                          | All            | Cystitis in trichomoniasis                  |
| K1548                          | All            | Cystitis in tuberculosis                    |
| K154z                          | All            | Cystitis in diseases EC NOS                 |
| K155.                          | All            | Recurrent cystitis                          |
| K15y.                          | All            | Other specified cystitis                    |
| K15y0                          | All            | Cystitis cystica                            |
| K15y1                          | All            | Irradiation cystitis                        |
| K15y2                          | All            | Abscess of bladder                          |
| K15y3                          | All            | Malakoplakia of bladder                     |
| K15yz                          | All            | Other cystitis NOS                          |
| K15z.                          | All            | Cystitis NOS                                |
| K190.                          | All            | Urinary tract infection, site not specified |
| K1900                          | All            | Bacteriuria, site not specified             |
| K1901                          | All            | Pyuria, site not specified                  |

|                |         |                                                 |
|----------------|---------|-------------------------------------------------|
| K1902          | All     | Post operative urinary tract infection          |
| K1903          | All     | Recurrent urinary tract infection               |
| K1904          | All     | Chronic urinary tract infection                 |
| K1905          | All     | Urinary tract infection                         |
| K1906          | All     | Urosepsis                                       |
| K190X          | All     | Persistent proteinuria, unspecified             |
| K190z          | All     | Urinary tract infection, site not specified NOS |
| Read CTV3 Code | Term ID | Description                                     |
| A32y3          | All     | Diphtheritic cystitis                           |
| A9811          | All     | Acute gonococcal cystitis                       |
| A9831          | All     | Chronic gonococcal cystitis                     |
| K15..          | All     | Inflammation of bladder                         |
| K150.          | All     | NULL                                            |
| K151.          | All     | Chronic interstitial cystitis                   |
| K1510          | All     | Hunner's ulcer                                  |
| K1511          | All     | Panmural fibrosis of bladder                    |
| K1512          | All     | Submucous cystitis                              |
| K151z          | All     | Chronic interstitial cystitis NOS               |
| K152.          | All     | Other chronic cystitis                          |
| K1520          | All     | Subacute cystitis                               |
| K152y          | All     | Chronic cystitis unspecified                    |
| K152z          | All     | Other chronic cystitis NOS                      |
| K153.          | All     | (Trigonitis) or (follicular cystitis)           |
| K1530          | All     | Acute trigonitis                                |
| K1531          | All     | Chronic trigonitis                              |
| K1532          | All     | Urethrotrigonitis                               |
| K153z          | All     | Trigonitis NOS                                  |
| K154.          | All     | Cystitis in diseases EC                         |
| K1540          | All     | Actinomycotic cystitis                          |
| K1541          | All     | Amoebic cystitis                                |
| K1542          | All     | Schistosomiasis of bladder                      |
| K1543          | All     | Echinococcal cystitis                           |
| K1544          | All     | NULL                                            |
| K1545          | All     | Gonococcal cystitis                             |
| K1546          | All     | Monilial cystitis                               |
| K1547          | All     | Trichomonal cystitis                            |
| K1548          | All     | Tuberculous cystitis                            |
| K154z          | All     | Cystitis in diseases EC NOS                     |
| K155.          | All     | Recurrent cystitis                              |
| K15y.          | All     | Other specified cystitis                        |
| K15y0          | All     | Cystitis cystica                                |
| K15y1          | All     | Irradiation cystitis                            |

|       |     |                                                              |
|-------|-----|--------------------------------------------------------------|
| K15y2 | All | Pyocystis                                                    |
| K15y3 | All | NULL                                                         |
| K15yz | All | Other cystitis NOS                                           |
| K15z. | All | Cystitis NOS                                                 |
| K1632 | All | Diverticulitis of bladder                                    |
| K190. | All | Urinary tract infection: [site not specified] or [recurrent] |
| K1900 | All | Bacteriuria: [site not specified] or [asymptomatic]          |
| K1901 | All | Pyuria                                                       |
| K1902 | All | Postoperative urinary tract infection                        |
| K1903 | All | Recurrent urinary tract infection                            |
| K1904 | All | Chronic urinary tract infection                              |
| K1905 | All | NULL                                                         |
| K1906 | All | NULL                                                         |
| K190X | All | NULL                                                         |
| K190z | All | Urinary tract infection, site not specified NOS              |
| Kyu50 | All | [X]Other chronic cystitis                                    |
| Kyu51 | All | [X]Other cystitis                                            |
| X30Na | All | Recurrent cystitis - culture-negative                        |
| X30Nb | All | Chronic cystitis - culture negative                          |
| X30Nc | All | Chronic nonspecific cystitis                                 |
| X30Nd | All | Acute radiation cystitis                                     |
| X30Ne | All | Chronic radiation cystitis                                   |
| X30Nf | All | Chemical cystitis                                            |
| X30Ng | All | Leukoplakia of bladder                                       |
| X30Nh | All | Malakoplakia of bladder                                      |
| X30NV | All | Infective cystitis                                           |
| X30NX | All | Chronic infective cystitis                                   |
| X30NY | All | Non-infective cystitis                                       |
| X30NZ | All | Acute cystitis - culture-negative                            |
| X30Pa | All | Recurrent infective cystitis                                 |
| X30PZ | All | Acute culture positive cystitis                              |
| Xa0t3 | All | Amyloid of bladder                                           |
| Xa8EJ | All | Acute cystitis                                               |
| Xa8EK | All | Chronic cystitis                                             |
| XaA05 | All | Bullous cystitis                                             |
| XaB66 | All | Acute infective cystitis                                     |
| XaY6b | All | Follicular cystitis                                          |
| XE0dq | All | Trigonitis                                                   |
| XE0fX | All | Acute cystitis (& [recurrent])                               |
| XE0fZ | All | (Cystitis NOS) or (trigonitis)                               |
| XM0sZ | All | Acute recurrent cystitis                                     |
| XM1Ov | All | Infected diverticulum of bladder                             |

|       |     |                       |
|-------|-----|-----------------------|
| XM10x | All | Cystitis of pregnancy |
| XM1Us | All | Sterile pyuria        |

**Supplementary table S5.8.** The case definitions for included Genital infections.

| Genital infections |         |                                          |
|--------------------|---------|------------------------------------------|
| Read V2 Code       | Term ID | Description                              |
| AB21.              | All     | Candidal vulvovaginitis                  |
| AB210              | All     | Candidiasis of vulva                     |
| AB211              | All     | Candidiasis of vagina                    |
| AB21z              | All     | Candidal vulvovaginitis NOS              |
| AB22.              | All     | Other urogenital candidiasis             |
| AB220              | All     | Candidal balanitis                       |
| AB221              | All     | Perianal candidiasis                     |
| AB22z              | All     | Other urogenital candida NOS             |
| K17..              | All     | Urethritis due to non venereal causes    |
| K170.              | All     | Urethral and periurethral abscess        |
| K1700              | All     | Urethral abscess unspecified             |
| K1701              | All     | Bulbourethral gland abscess              |
| K1702              | All     | Urethral gland abscess                   |
| K1703              | All     | Periurethral cellulitis                  |
| K1704              | All     | Periurethral abscess                     |
| K170z              | All     | Urethral abscess NOS                     |
| K172.              | All     | Candidal urethritis                      |
| K17y2              | All     | Skene's glands adenitis                  |
| K17y3              | All     | Cowperitis                               |
| K17y4              | All     | Urethral meatitis                        |
| K17y6              | All     | Verumontanitis                           |
| K17y7              | All     | Utriculus masculinus                     |
| K17yz              | All     | Other urethritis NOS                     |
| K17z.              | All     | Urethritis due to non venereal cause NOS |
| Read CTV3 Code     | Term ID | Description                              |
| AB21.              | All     | Candidal vulvovaginitis                  |
| XE0SH              | All     | Candidal vulvovaginitis NOS              |
| X407o              | All     | Streptococcal vulvovaginitis             |
| X407r              | All     | Chlamydial vulvovaginitis                |
| K4212              | All     | Vulvovaginitis unspecified               |
| K4216              | All     | Vulvovaginitis in diseases EC            |
| Xa16P              | All     | Infective vulvitis                       |
| X4087              | All     | Vulval amoebiasis                        |
| AB210              | All     | Candidiasis of vulva                     |
| X407h              | All     | Infective vaginitis                      |
| AB211              | All     | Vaginal candidiasis                      |
| Xa0Er              | All     | Trichomonal vaginitis                    |
| X407i              | All     | Bacterial vaginosis                      |
| X4080              | All     | Vaginal vault infection                  |
| AB22.              | All     | Other urogenital candidiasis             |
| AB22z              | All     | Other urogenital candida NOS             |

|       |     |                                     |
|-------|-----|-------------------------------------|
| XaBjl | All | Infective balanitis                 |
| X4007 | All | Bacterial balanitis                 |
| X4008 | All | Anaerobic balanitis                 |
| X400A | All | Mycoplasma balanitis                |
| XE0SI | All | Candidal balanitis                  |
| A05y1 | All | Amoebic balanitis                   |
| X70Qk | All | Anogenital candidiasis              |
| XE0SJ | All | Perianal candidiasis                |
| X70Qo | All | Anal candidiasis                    |
| X70Qj | All | Candida infection of genital region |
| X407N | All | Candidiasis of cervix               |
| X70Qn | All | Penile candidiasis                  |
| XE0SI | All | Candidal balanitis                  |
| X30Oy | All | Infective urethritis                |
| XE0dt | All | Non-venereal urethritis             |
| X30P3 | All | Tuberculous urethritis              |
| X30P6 | All | Urethral abscess                    |
| K1700 | All | Urethral abscess unspecified        |
| K170z | All | Urethral abscess NOS                |
| K17y2 | All | Skene's glands adenitis             |
| K17y3 | All | Cowperitis                          |
| K17y4 | All | Urethral meatitis                   |
| X30PD | All | Male accessory gland infection      |
| K17y6 | All | Verumontanitis                      |
| K17yz | All | Other urethritis NOS                |
| K1703 | All | Periurethral cellulitis             |
| K1704 | All | Periurethral abscess                |



**Supplementary table S5.9.** The case definitions for included Gastrointestinal infection.

| <b>Gastrointestinal infection</b> |                |                                               |
|-----------------------------------|----------------|-----------------------------------------------|
| <b>Read V2 Code</b>               | <b>Term ID</b> | <b>Description</b>                            |
| 19G..                             | All            | Diarrhoea and vomiting                        |
| 1J8..                             | All            | Suspected food poisoning                      |
| A0...                             | All            | Intestinal infectious diseases                |
| A00..                             | All            | Cholera                                       |
| A000.                             | All            | Cholera - <i>Vibrio cholerae</i>              |
| A001.                             | All            | Cholera - <i>Vibrio cholerae</i> El Tor       |
| A00z.                             | All            | Cholera NOS                                   |
| A01..                             | All            | Typhoid and paratyphoid fevers                |
| A010.                             | All            | Typhoid fever                                 |
| A011.                             | All            | Paratyphoid fever A                           |
| A012.                             | All            | Paratyphoid fever B                           |
| A013.                             | All            | Paratyphoid fever C                           |
| A01z.                             | All            | Paratyphoid fever NOS                         |
| A02..                             | All            | Other salmonella infections                   |
| A020.                             | All            | Salmonella gastroenteritis                    |
| A021.                             | All            | Salmonella septicaemia                        |
| A022.                             | All            | Localised salmonella infection                |
| A0220                             | All            | Local salmonella infection unspecified        |
| A0221                             | All            | Salmonella meningitis                         |
| A0222                             | All            | Salmonella pneumonia                          |
| A0223                             | All            | Salmonella arthritis                          |
| A0224                             | All            | Salmonella osteomyelitis                      |
| A022z                             | All            | Other local salmonella infection              |
| A023.                             | All            | Salmonella sepsis                             |
| A02y.                             | All            | Other specified salmonella infection          |
| A02z.                             | All            | Salmonella infection NOS                      |
| A03..                             | All            | Shigellosis                                   |
| A030.                             | All            | <i>Shigella dysenteriae</i> (group A)         |
| A031.                             | All            | <i>Shigella flexneri</i> (group B)            |
| A032.                             | All            | <i>Shigella boydii</i> (group C)              |
| A033.                             | All            | <i>Shigella sonnei</i> (group D)              |
| A03y.                             | All            | Other specified shigella infection            |
| A03z.                             | All            | Shigellosis NOS                               |
| A04..                             | All            | Other bacterial food poisoning                |
| A040.                             | All            | Staphylococcal food poisoning                 |
| A041.                             | All            | Botulism                                      |
| A042.                             | All            | <i>Clostridium perfringens</i> food poisoning |
| A043.                             | All            | Other clostridia causing food poisoning       |
| A044.                             | All            | <i>Vibrio parahaemolyticus</i> food poisoning |
| A04y.                             | All            | Other specified bacterial food poisoning      |

|       |     |                                                              |
|-------|-----|--------------------------------------------------------------|
| A04y0 | All | Foodborne <i>Bacillus cereus</i> intoxication                |
| A04z. | All | Food poisoning NOS                                           |
| A05.. | All | Amoebiasis                                                   |
| A050. | All | Acute amoebic dysentery                                      |
| A051. | All | Chronic intestinal amoebiasis                                |
| A052. | All | Amoebic nondysenteric colitis                                |
| A053. | All | Amoebic liver abscess                                        |
| A054. | All | Amoebic lung abscess                                         |
| A055. | All | Amoebic brain abscess                                        |
| A056. | All | Amoebic skin ulceration                                      |
| A05y. | All | Amoebic infection of other sites                             |
| A05y0 | All | Amoebic appendicitis                                         |
| A05y1 | All | Amoebic balanitis                                            |
| A05y2 | All | Amoeboma                                                     |
| A05yz | All | Amoebic infection of other sites NOS                         |
| A05z. | All | Amoebiasis NOS                                               |
| A06.. | All | Other protozoal intestinal diseases                          |
| A060. | All | Balantidiasis                                                |
| A061. | All | Giardiasis - Lambliasis                                      |
| A062. | All | Coccidiosis                                                  |
| A063. | All | Intestinal trichomoniasis                                    |
| A064. | All | Cryptosporidiosis                                            |
| A06y. | All | Other specified protozoal intestinal diseases                |
| A06z. | All | Protozoal intestinal diseases NOS                            |
| A07.. | All | Intestinal infection due to other organisms                  |
| A070. | All | <i>Escherichia coli</i> gastrointestinal tract infection     |
| A0700 | All | Enteropathogenic <i>Escherichia coli</i> infection           |
| A0701 | All | Enterotoxigenic <i>Escherichia coli</i> infection            |
| A0702 | All | Enteroinvasive <i>Escherichia coli</i> infection             |
| A0703 | All | Enterohaemorrhagic <i>Escherichia coli</i> infection         |
| A071. | All | Arizona paracolonic gastrointestinal tract infection         |
| A072. | All | <i>Aerobacter aerogenes</i> gastrointestinal tract infection |
| A073. | All | <i>Proteus</i> gastrointestinal tract infection              |
| A0730 | All | <i>Proteus mirabilis</i> gastrointestinal tract infection    |
| A0731 | All | <i>Proteus morganii</i> gastrointestinal tract infection     |
| A073z | All | <i>Proteus</i> gastrointestinal tract infection NOS          |
| A074. | All | Other specified gastrointestinal tract bacterial infection   |
| A0740 | All | Staphylococcal gastrointestinal tract infection              |
| A0741 | All | <i>Pseudomonas</i> gastrointestinal tract infection          |
| A0743 | All | <i>Campylobacter</i> gastrointestinal tract infection        |
| A0744 | All | Enteritis due to <i>Yersinia enterocolitica</i>              |
| A0745 | All | <i>Helicobacter pylori</i> gastrointestinal tract infection  |
| A074y | All | Other specified other gastrointestinal infection             |
| A074z | All | Other specified gastrointestinal tract infections NOS        |
| A075. | All | Unspecified bacterial enteritis                              |

|       |     |                                                                       |
|-------|-----|-----------------------------------------------------------------------|
| A076. | All | Enteritis due to specified virus                                      |
| A0760 | All | Enteritis due to adenovirus                                           |
| A0761 | All | Enteritis due to enterovirus                                          |
| A0762 | All | Enteritis due to rotavirus                                            |
| A0763 | All | Enteritis due to norovirus                                            |
| A076z | All | Enteritis due to specified virus NOS                                  |
| A07y. | All | Gastrointestinal tract infection due to specified organism NEC        |
| A07y0 | All | Viral gastroenteritis                                                 |
| A07y1 | All | Infantile viral gastroenteritis                                       |
| A07z. | All | Gastrointestinal tract infection due to specified organism NOS        |
| A08.. | All | Ill-defined intestinal tract infections                               |
| A080. | All | Infectious colitis, enteritis and gastroenteritis                     |
| A0801 | All | Infectious colitis                                                    |
| A0802 | All | Infectious enteritis                                                  |
| A0803 | All | Infectious gastroenteritis                                            |
| A0804 | All | Catarrhal dysentery                                                   |
| A0805 | All | Haemorrhagic dysentery                                                |
| A080z | All | Infectious colitis, enteritis and gastroenteritis NOS                 |
| A081. | All | Colitis, enteritis and gastroenteritis presumed infectious            |
| A0810 | All | Colitis - presumed infectious origin                                  |
| A0811 | All | Enteritis - presumed infectious origin                                |
| A0812 | All | Gastroenteritis - presumed infectious origin                          |
| A081z | All | Colitis, enteritis and gastroenteritis presumed infectious origin NOS |
| A082. | All | Infectious diarrhoea                                                  |
| A0820 | All | Dysenteric diarrhoea                                                  |
| A0821 | All | Epidemic diarrhoea                                                    |
| A082z | All | Infectious diarrhoea NOS                                              |
| A083. | All | Diarrhoea of presumed infectious origin                               |
| A08z. | All | Ill defined gastrointestinal tract infections NOS                     |
| A0y.. | All | Other specified infectious diseases of intestinal tract               |
| A0z.. | All | Intestinal tract infectious disease NOS                               |
| A3Ay2 | All | Clostridium difficile infection                                       |
| A78y1 | All | Epidemic vomiting syndrome                                            |
| Ayu00 | All | [X]Cholera, unspecified                                               |
| Ayu04 | All | [X]Other shigellosis                                                  |
| Ayu05 | All | [X]Shigellosis, unspecified                                           |
| Ayu07 | All | [X]Bacterial intestinal infection, unspecified                        |
| Ayu0F | All | [X]Viral intestinal infection, unspecified                            |
| Ayu0H | All | [X]Diarrhoea and gastroenteritis of presumed infectious origin        |
| J43.. | All | Other non-infective inflammatory gastroenteritis and colitis          |
| J43z. | All | Other non-infective gastroenteritis and colitis NOS                   |

| Read CTV3 Code | Term ID | Description                                                                                  |
|----------------|---------|----------------------------------------------------------------------------------------------|
| 19G..          | All     | NULL                                                                                         |
| 1J8..          | All     | NULL                                                                                         |
| A0...          | All     | (Intestinal infectious diseases) or (food poisoning [& (bacterial)]) or (infective vomiting) |
| A00..          | All     | (Cholera) or (Vibrio cholerae)                                                               |
| A000.          | All     | Cholera - Vibrio cholerae                                                                    |
| A001.          | All     | Cholera - Vibrio cholerae O1 El Tor biotype                                                  |
| A00z.          | All     | Cholera NOS                                                                                  |
| A01..          | All     | Typhoid and paratyphoid fevers                                                               |
| A010.          | All     | Fever: [typhoid] or [enteric]                                                                |
| A011.          | All     | Paratyphoid A                                                                                |
| A012.          | All     | Paratyphoid B                                                                                |
| A013.          | All     | Paratyphoid C                                                                                |
| A01z.          | All     | Paratyphoid fever NOS                                                                        |
| A02..          | All     | Other salmonella infections                                                                  |
| A020.          | All     | Salmonellosis (& [gastroenteritis] or [food poisoning])                                      |
| A021.          | All     | Salmonella septicaemia                                                                       |
| A022.          | All     | Localised salmonella infection                                                               |
| A0220          | All     | Local salmonella infection unspecified                                                       |
| A0221          | All     | NULL                                                                                         |
| A0222          | All     | Salmonella pneumonia                                                                         |
| A0223          | All     | Salmonella arthritis                                                                         |
| A0224          | All     | Salmonella osteomyelitis                                                                     |
| A022z          | All     | Other local salmonella infection                                                             |
| A023.          | All     | NULL                                                                                         |
| A02y.          | All     | Other specified salmonella infection                                                         |
| A02z.          | All     | Salmonella infection NOS                                                                     |
| A03..          | All     | Shigellosis                                                                                  |
| A030.          | All     | (Shigella dysenteriae - group A) or (bacillary dysentery)                                    |
| A031.          | All     | Shigella flexneri (group B)                                                                  |
| A032.          | All     | Shigella boydii (group C)                                                                    |
| A033.          | All     | Shigella sonnei: [group D] or [bacillary dysentery]                                          |
| A03y.          | All     | Other specified shigella infection                                                           |
| A03z.          | All     | Shigellosis NOS                                                                              |
| A04..          | All     | Other bacterial food poisoning                                                               |
| A040.          | All     | Staphylococcal food poisoning                                                                |
| A041.          | All     | NULL                                                                                         |
| A042.          | All     | Clostridium perfringens food poisoning                                                       |
| A043.          | All     | Other Clostridia causing food poisoning                                                      |
| A044.          | All     | Vibrio parahaemolyticus food poisoning                                                       |
| A04y.          | All     | Other specified bacterial food poisoning                                                     |
| A04y0          | All     | NULL                                                                                         |
| A04z.          | All     | Food poisoning NOS                                                                           |
| A05..          | All     | Amoebiasis                                                                                   |

|       |     |                                                                                         |
|-------|-----|-----------------------------------------------------------------------------------------|
| A050. | All | Acute amoebic dysentery                                                                 |
| A051. | All | Chronic intestinal amoebiasis                                                           |
| A052. | All | Amoebic nondysenteric colitis                                                           |
| A053. | All | Amoebic liver abscess                                                                   |
| A054. | All | Amoebic lung abscess                                                                    |
| A055. | All | Amoebic brain abscess                                                                   |
| A056. | All | Amoebic ulcer of skin                                                                   |
| A05y. | All | Amoebic infection of other sites                                                        |
| A05y0 | All | Amoebic appendicitis                                                                    |
| A05y1 | All | Amoebic balanitis                                                                       |
| A05y2 | All | Amoeboma                                                                                |
| A05yz | All | Amoebic infection of other sites NOS                                                    |
| A05z. | All | Amoebiasis NOS                                                                          |
| A06.. | All | Other protozoal intestinal diseases                                                     |
| A060. | All | Balantidiasis                                                                           |
| A061. | All | Giardiasis: [lambliasis] or [colitis]                                                   |
| A062. | All | Coccidiosis (& [intestinal])                                                            |
| A063. | All | Trichomonas hominis infection                                                           |
| A064. | All | NULL                                                                                    |
| A06y. | All | Other specified protozoal intestinal diseases                                           |
| A06z. | All | Protozoal intestinal diseases NOS                                                       |
| A07.. | All | Intestinal infection due to other organisms                                             |
| A070. | All | Escherichia coli gastrointestinal tract infection                                       |
| A0700 | All | NULL                                                                                    |
| A0701 | All | NULL                                                                                    |
| A0702 | All | NULL                                                                                    |
| A0703 | All | NULL                                                                                    |
| A071. | All | Arizona paracoln gastrointestinal tract infection                                       |
| A072. | All | Aerobacter aerogenes gastrointestinal tract infection                                   |
| A073. | All | Proteus gastrointestinal tract infection                                                |
| A0730 | All | Proteus mirabilis gastrointestinal tract infection                                      |
| A0731 | All | Morganella morganii gastrointestinal tract infection                                    |
| A073z | All | Proteus gastrointestinal tract infection NOS                                            |
| A074. | All | Other specified gastrointestinal tract bacterial infection                              |
| A0740 | All | Staphylococcal: [GIT infection] or [diarrhoea] or [toxin diarrhoea]                     |
| A0741 | All | Pseudomonas: [GIT infection] or [pyocyanea diarrhoea]                                   |
| A0743 | All | (Campylobacter GIT infection (& [diarrhoea] or [enteritis]) or (helicobacter gastritis) |
| A0744 | All | NULL                                                                                    |
| A0745 | All | NULL                                                                                    |
| A074y | All | Other specified other gastrointestinal infection                                        |
| A074z | All | Other specified gastrointestinal tract infections NOS                                   |
| A075. | All | Unspecified bacterial enteritis                                                         |

|       |     |                                                                                     |
|-------|-----|-------------------------------------------------------------------------------------|
| A076. | All | (Specified virus enteritis) or (viral: [diarrhoea] or [vomiting])                   |
| A0760 | All | Enteritis due to adenovirus                                                         |
| A0761 | All | Enteritis due to enterovirus                                                        |
| A0762 | All | Enteritis due to rotavirus                                                          |
| A0763 | All | NULL                                                                                |
| A076z | All | Enteritis due to specified virus NOS                                                |
| A07y. | All | Gastrointestinal tract infection due to specified organism NEC                      |
| A07y0 | All | Viral gastroenteritis                                                               |
| A07y1 | All | NULL                                                                                |
| A07z. | All | Gastrointestinal tract infection due to specified organism NOS                      |
| A08.. | All | (Ill-defined GIT infections) or (gastric flu)                                       |
| A080. | All | Infectious colitis, enteritis and gastroenteritis                                   |
| A0801 | All | Infective colitis                                                                   |
| A0802 | All | Infective enteritis                                                                 |
| A0803 | All | Infectious gastroenteritis                                                          |
| A0804 | All | Catarrhal dysentery                                                                 |
| A0805 | All | Haemorrhagic dysentery                                                              |
| A080z | All | Infectious colitis, enteritis and gastroenteritis NOS                               |
| A081. | All | Colitis and enteritis (& [gastroenteritis]) presumed infectious                     |
| A0810 | All | Colitis - presumed infectious origin                                                |
| A0811 | All | Enteritis - presumed infectious origin                                              |
| A0812 | All | Gastroenteritis - presumed infectious origin                                        |
| A081z | All | Colitis, enteritis and gastroenteritis presumed infectious origin NOS               |
| A082. | All | Diarrhoea: [infectious] or [travellers]                                             |
| A0820 | All | Dysenteric diarrhoea                                                                |
| A0821 | All | (Epidemic diarrhoea) or (viral gastroenteritis)                                     |
| A082z | All | Infectious diarrhoea NOS                                                            |
| A083. | All | (Infectious diarrhoea: [presumed] or [? & vomiting]) or (infantile gastroenteritis) |
| A08z. | All | Ill-defined gastrointestinal tract infections NOS                                   |
| A0y.. | All | Other specified infectious diseases of intestinal tract                             |
| A0z.. | All | Intestinal tract infectious disease NOS                                             |
| A3Ay2 | All | Clostridium difficile infection                                                     |
| A78y1 | All | Epidemic vomiting syndrome                                                          |
| Ayu00 | All | [X]Cholera, unspecified                                                             |
| Ayu04 | All | [X]Other shigellosis                                                                |
| Ayu05 | All | [X]Shigellosis, unspecified                                                         |
| Ayu07 | All | [X]Bacterial intestinal infection, unspecified                                      |
| Ayu0F | All | [X]Viral intestinal infection, unspecified                                          |
| Ayu0H | All | [X]Diarrhoea and gastroenteritis of presumed infectious origin                      |

|       |     |                                                                                                       |
|-------|-----|-------------------------------------------------------------------------------------------------------|
| H24y6 | All | Typhoid pneumonia                                                                                     |
| J43.. | All | (Gastroenteriti) or (enterocolitis) or (other non-infective inflammatory gastroenteritis and colitis) |
| J43z. | All | (Chronic diarrhoea) or (other non-infective gastroenteritis and colitis NOS)                          |
| X301R | All | Helicobacter gastritis                                                                                |
| X303g | All | Colitis,enteritis ? infectious                                                                        |
| X303l | All | Amoebic colitis                                                                                       |
| X303n | All | Fulminant amoebic colitis                                                                             |
| X303q | All | Cytomegaloviral colitis                                                                               |
| X30Bc | All | Prototheca diarrhoea                                                                                  |
| X30Bd | All | Food poisoning                                                                                        |
| X30BN | All | Gastroenteritis                                                                                       |
| X30BP | All | Vomiting - infective                                                                                  |
| X30BR | All | Adenoviral gastroenteritis                                                                            |
| X30BS | All | Rotavirus gastroenteritis                                                                             |
| X30BT | All | Norwalk virus gastroenteritis                                                                         |
| X30BU | All | Small round structured virus gastroenteritis                                                          |
| X30BX | All | Dysentery                                                                                             |
| X70Ft | All | Infantile gastroenteritis                                                                             |
| X70Fv | All | Bacterial food poisoning                                                                              |
| X70Fw | All | Bacillus cereus food poisoning                                                                        |
| X70Ge | All | Asymptomatic amoebic infection                                                                        |
| X70Gf | All | Symptomatic non-invasive amoebic infection                                                            |
| X70Gg | All | Amoebic toxic megacolon                                                                               |
| X70Gi | All | Amoebic perianal ulceration                                                                           |
| X70GJ | All | Cholera - Vibrio cholerae O1 Classical biotype                                                        |
| X70GK | All | Cholera - non-O1 group vibrio                                                                         |
| X70GL | All | Cholera - O139 group Vibrio cholerae                                                                  |
| X70GN | All | Enterotoxigenic Escherichia coli gastrointestinal tract infection                                     |
| X70GO | All | Travellers' diarrhoea                                                                                 |
| X70Gp | All | Cryptosporidiosis                                                                                     |
| X70GP | All | Enteropathogenic Escherichia coli gastrointestinal tract infection                                    |
| X70GQ | All | Verotoxigenic Escherichia coli gastrointestinal tract infection                                       |
| X70GR | All | Enteroinvasive Escherichia coli gastrointestinal tract infection                                      |
| X70GS | All | Enteroadherent Escherichia coli gastrointestinal tract infection                                      |
| X70GZ | All | Yersinia enterocolitis                                                                                |
| X73Mv | All | Vibrio cholerae                                                                                       |
| Xa01t | All | Recurrent salmonella septicaemia                                                                      |
| Xa2Vc | All | Astrovirus gastroenteritis                                                                            |
| Xa2Vd | All | Calicivirus gastroenteritis                                                                           |

|       |     |                                                                                                      |
|-------|-----|------------------------------------------------------------------------------------------------------|
| Xa3dy | All | Specific gastrointestinal infectious disease                                                         |
| Xa8ES | All | Acute infective gastroenteritis                                                                      |
| Xa8I7 | All | Salmonella food poisoning                                                                            |
| Xa97W | All | Cholera - O1 group <i>Vibrio cholerae</i>                                                            |
| Xa97X | All | <i>Staphylococcus aureus</i> food poisoning                                                          |
| XaB5z | All | Enterocolitis                                                                                        |
| XaBE5 | All | <i>Helicobacter pylori</i> gastrointestinal tract infection                                          |
| XaBLu | All | Infantile viral gastroenteritis                                                                      |
| XaDbT | All | Fungal gastroenteritis                                                                               |
| XalnX | All | Suspected food poisoning                                                                             |
| XaREr | All | Enteritis due to norovirus                                                                           |
| XaYaf | All | Sepsis due to <i>Salmonella</i>                                                                      |
| XE0aj | All | Other non-infective inflammatory gastroenteritis and colitis                                         |
| XE0an | All | Other non-infective gastroenteritis and colitis NOS                                                  |
| XE0Qc | All | Cholera                                                                                              |
| XE0Qd | All | Typhoid fever                                                                                        |
| XE0Qe | All | <i>Salmonella</i> gastroenteritis                                                                    |
| XE0Qf | All | <i>Shigella dysenteriae</i> (group A)                                                                |
| XE0Qg | All | <i>Shigella sonnei</i> (group D)                                                                     |
| XE0Qi | All | Intestinal coccidiosis                                                                               |
| XE0Qj | All | Staphylococcal gastrointestinal tract infection                                                      |
| XE0Qk | All | <i>Pseudomonas</i> gastrointestinal tract infection                                                  |
| XE0Ql | All | <i>Campylobacter</i> gastrointestinal tract infection                                                |
| XE0Qm | All | Enteritis due to specified virus                                                                     |
| XE0Qn | All | Ill-defined intestinal tract infections                                                              |
| XE0Qo | All | Colitis, enteritis and gastroenteritis presumed infectious                                           |
| XE0Qp | All | Epidemic diarrhoea                                                                                   |
| XE0Qq | All | Diarrhoea of presumed infectious origin                                                              |
| XE0Sm | All | (Intestinal infectious diseases) or (unspecified enteritis)                                          |
| XE0Ss | All | (Bacillary dysentery) or (shigellosis)                                                               |
| XE0Su | All | Giardiasis (& [colitis])                                                                             |
| XE0Sw | All | (OS GIT infections) or (botulism) or ( <i>Campylobacter</i> enteritis)                               |
| XE0Sy | All | Viral: [ill-defined GIT infections (& diarrhoea)] or [gastroenteritis]                               |
| XE0T0 | All | (Gastroenteritis (& [viral NOS])) or (vomiting: [viral] or [& diarrhoea infection]) or (gastric flu) |
| XE0T2 | All | Infectious: [intestinal disease NOS] or [diarrhoea NOS]                                              |
| XM0pJ | All | Bacterial gastroenteritis                                                                            |
| XM0pK | All | Bacillary dysentery                                                                                  |



Supplementary table S5.10. The case definitions for included Herpes simplex.

| Herpes simplex |         |                                                      |
|----------------|---------|------------------------------------------------------|
| Read V2 Code   | Term ID | Description                                          |
| A54..          | All     | Herpes simplex                                       |
| A540.          | All     | Eczema herpeticum - Kaposi's varicelliform eruption  |
| A541.          | All     | Genital herpes simplex                               |
| A5410          | All     | Genital herpes unspecified                           |
| A5411          | All     | Herpetic vulvovaginitis                              |
| A5412          | All     | Herpetic ulceration of vulva                         |
| A5413          | All     | Herpetic infection of penis                          |
| A5414          | All     | Herpesviral infection of perianal skin and rectum    |
| A5415          | All     | Anogenital herpesviral infection                     |
| A5416          | All     | Genital herpes simplex type 1                        |
| A5417          | All     | Genital herpes simplex type 2                        |
| A5418          | All     | Recurrent genital herpes simplex type 1              |
| A5419          | All     | Recurrent genital herpes simplex type 2              |
| A541z          | All     | Genital herpes simplex NOS                           |
| A542.          | All     | Herpetic gingivostomatitis                           |
| A543.          | All     | Herpetic meningoencephalitis                         |
| A544.          | All     | Ophthalmic herpes simplex                            |
| A5440          | All     | Unspecified ophthalmic herpes                        |
| A5441          | All     | Herpes simplex eyelid dermatitis                     |
| A5442          | All     | Herpes simplex dendritic keratitis                   |
| A5443          | All     | Herpes simplex disciform keratitis                   |
| A5444          | All     | Herpes simplex iridocyclitis                         |
| A5445          | All     | Herpes simplex ophthalmicus                          |
| A544z          | All     | Ophthalmic herpes simplex NOS                        |
| A545.          | All     | Herpes simplex septicaemia                           |
| A546.          | All     | Herpes simplex whitlow                               |
| A548.          | All     | [X] Herpes labialis                                  |
| A54x.          | All     | Herpes simplex with other specified complication     |
| A54x0          | All     | Visceral herpes simplex                              |
| A54x1          | All     | Herpes simplex meningitis                            |
| A54x2          | All     | Herpes simplex otitis externa                        |
| A54x3          | All     | Herpesviral vesicular dermatitis                     |
| A54x4          | All     | Herpes simplex pneumonia                             |
| A54xz          | All     | Herpes simplex with other specified complication NOS |
| A54y.          | All     | Herpes simplex with unspecified complication         |
| A54z.          | All     | Herpes simplex no complication NOS                   |
| Read CTV3 Code | Term ID | Description                                          |
| A54..          | All     | (Herpes simplex [& viral infection]) or (scrumpox)   |
| A540.          | All     | Eczema herpeticum                                    |
| A541.          | All     | Genital herpes                                       |
| A5410          | All     | Genital herpes unspecified (& [simplex group])       |

|       |     |                                                              |
|-------|-----|--------------------------------------------------------------|
| A5411 | All | Herpetic vulvovaginitis                                      |
| A5412 | All | Herpetic ulceration of vulva                                 |
| A5413 | All | Herpetic infection of penis                                  |
| A5414 | All | Herpesviral infection of perianal skin and rectum            |
| A5415 | All | Anogenital herpesviral infection                             |
| A5416 | All | NULL                                                         |
| A5417 | All | NULL                                                         |
| A5418 | All | NULL                                                         |
| A5419 | All | NULL                                                         |
| A541z | All | Genital herpes simplex NOS                                   |
| A542. | All | Herpetic: [gingivostomatitis] or [cold sore] or [stomatitis] |
| A543. | All | (Herpetic meningoencephalitis) or (Simian B disease)         |
| A544. | All | Ophthalmic herpes simplex                                    |
| A5440 | All | Unspecified ophthalmic herpes (& [simplex group])            |
| A5441 | All | Herpes simplex eyelid dermatitis                             |
| A5442 | All | Herpes simplex dendritic keratitis                           |
| A5443 | All | Herpes simplex disciform keratitis                           |
| A5444 | All | Herpes simplex iridocyclitis                                 |
| A5445 | All | NULL                                                         |
| A544z | All | Ophthalmic herpes simplex NOS                                |
| A545. | All | Herpes simplex septicaemia                                   |
| A546. | All | Herpes simplex whitlow                                       |
| A548. | All | NULL                                                         |
| A54x. | All | Herpes simplex with other specified complication             |
| A54x0 | All | Visceral herpes simplex                                      |
| A54x1 | All | NULL                                                         |
| A54x2 | All | NULL                                                         |
| A54x3 | All | Herpesviral vesicular dermatitis                             |
| A54x4 | All | NULL                                                         |
| A54xz | All | Herpes simplex with other specified complication NOS         |
| A54y. | All | Herpes simplex with unspecified complication                 |
| A54z. | All | Herpes: [simplex, no complication NOS] or [labialis]         |
| Ayu4G | All | [X]Anogenital herpes viral infection, unspecified            |
| F5015 | All | Herpes simplex otitis externa                                |
| X100g | All | Herpes simplex pneumonia                                     |
| X70Ja | All | Herpes simiae infection                                      |
| X70JU | All | Primary anogenital herpes                                    |
| X70JV | All | Recurrent anogenital herpes                                  |
| XaPEC | All | Genital herpes simplex type 1 infection                      |
| XaPED | All | Genital herpes simplex type 2 infection                      |
| XaPER | All | Recurrent genital herpes simplex type 1 infection            |
| XaPES | All | Recurrent genital herpes simplex type 2 infection            |
| XEORB | All | Herpes simplex infection                                     |
| XEORC | All | Herpetic gingivostomatitis                                   |
| XEORD | All | Herpes simplex encephalitis                                  |

|       |     |                                                        |
|-------|-----|--------------------------------------------------------|
| XE0RE | All | Herpes simplex no complication NOS                     |
| XE0TO | All | (Herpes simplex (& [type 1] or [type 2])) or (scumpox) |
| XE2vG | All | Genital herpes unspecified                             |
| XE2vH | All | Unspecified ophthalmic herpes                          |
| XM02r | All | Herpes labialis                                        |

Supplementary table S5.11. The case definitions for included Herpes zoster.

| <b>Herpes zoster</b>  |                |                                                                         |
|-----------------------|----------------|-------------------------------------------------------------------------|
| <b>Read V2 Code</b>   | <b>Term ID</b> | <b>Description</b>                                                      |
| A53..                 | All            | Herpes zoster                                                           |
| A530.                 | All            | Herpes zoster with meningitis                                           |
| A531.                 | All            | Herpes zoster with other central nervous system complication            |
| A5310                 | All            | Herpes zoster with other central nervous system complications           |
| A5311                 | All            | Geniculate herpes zoster                                                |
| A5312                 | All            | Postherpetic trigeminal neuralgia                                       |
| A5313                 | All            | Postherpetic polyneuropathy                                             |
| A5314                 | All            | Zoster encephalitis                                                     |
| A5315                 | All            | Postzoster neuralgia                                                    |
| A531z                 | All            | Herpes zoster with other central nervous system complication NOS        |
| A532.                 | All            | Herpes zoster with ophthalmic complication                              |
| A5320                 | All            | Herpes zoster with dermatitis of eyelid                                 |
| A5321                 | All            | Herpes zoster with keratoconjunctivitis                                 |
| A5322                 | All            | Herpes zoster iridocyclitis                                             |
| A5323                 | All            | Ophthalmic herpes zoster infection                                      |
| A5324                 | All            | Herpes zoster ophthalmic                                                |
| A532z                 | All            | Herpes zoster with other ophthalmic complication                        |
| A53x.                 | All            | Herpes zoster with other specified complication                         |
| A53x0                 | All            | Herpes zoster otitis externa                                            |
| A53x1                 | All            | Disseminated zoster                                                     |
| A53xz                 | All            | Herpes zoster with other specified complication NOS                     |
| A53y.                 | All            | Herpes zoster with unspecified complication                             |
| A53z.                 | All            | Herpes zoster NOS                                                       |
| <b>Read CTV3 Code</b> | <b>Term ID</b> | <b>Description</b>                                                      |
| A53..                 | All            | Herpes zoster [organism] or [infection - shingles]                      |
| A530.                 | All            | NULL                                                                    |
| A531.                 | All            | (Herpes zoster with other CNS complication) or (postherpetic neuralgia) |
| A5310                 | All            | NULL                                                                    |
| A5311                 | All            | (Geniculate herpes zoster) or (Ramsey Hunt syndrome)                    |
| A5312                 | All            | NULL                                                                    |
| A5313                 | All            | Post-herpetic polyneuropathy                                            |
| A5314                 | All            | NULL                                                                    |
| A5315                 | All            | NULL                                                                    |
| A531z                 | All            | Herpes zoster with other central nervous system complication NOS        |
| A532.                 | All            | Herpes zoster with ophthalmic complication                              |
| A5320                 | All            | Herpes zoster with dermatitis of eyelid                                 |
| A5321                 | All            | Herpes zoster with keratoconjunctivitis                                 |
| A5322                 | All            | Herpes zoster iridocyclitis                                             |
| A5323                 | All            | Ophthalmic herpes zoster infection                                      |
| A5324                 | All            | NULL                                                                    |

|       |     |                                                     |
|-------|-----|-----------------------------------------------------|
| A532z | All | Herpes zoster with other ophthalmic complication    |
| A53x. | All | Herpes zoster with other specified complication     |
| A53x0 | All | NULL                                                |
| A53x1 | All | Disseminated zoster                                 |
| A53xz | All | Herpes zoster with other specified complication NOS |
| A53y. | All | Herpes zoster with unspecified complication         |
| A53z. | All | Herpes zoster NOS                                   |

Supplementary table S5.12. The case definitions for included Meningitis.

| <b>Herpes zoster</b> |                |                                                            |
|----------------------|----------------|------------------------------------------------------------|
| <b>Read V2 Code</b>  | <b>Term ID</b> | <b>Description</b>                                         |
| F00..                | All            | Bacterial meningitis                                       |
| F000.                | All            | Haemophilus meningitis                                     |
| F001.                | All            | Pneumococcal meningitis                                    |
| F002.                | All            | Streptococcal meningitis                                   |
| F003.                | All            | Staphylococcal meningitis                                  |
| F004.                | All            | Meningitis - tuberculous                                   |
| F005.                | All            | Meningitis - meningococcal                                 |
| F007.                | All            | Meningitis in other bacterial disease classified elsewhere |
| F0070                | All            | Meningitis due to gonococcus                               |
| F0071                | All            | Meningitis due to listeriosis                              |
| F0072                | All            | Meningitis due to neurosyphilis                            |
| F0073                | All            | Meningitis due to salmonella                               |
| F0074                | All            | Meningitis due to congenital syphilis                      |
| F0075                | All            | Meningitis due to secondary syphilis                       |
| F0076                | All            | Meningitis due to typhoid fever                            |
| F0077                | All            | Meningitis due to actinomycosis                            |
| F0078                | All            | Meningitis due to pertussis                                |
| F007z                | All            | Unspecified meningitis in bacterial disease EC             |
| F00y.                | All            | Other specified bacterial meningitis                       |
| F00y0                | All            | Meningitis due to aerobacter aerogenes                     |
| F00y1                | All            | Meningitis due to bacillus pyocyaneus                      |
| F00y2                | All            | Meningitis due to escherichia coli                         |
| F00y3                | All            | Meningitis due to Friedlander bacillus                     |
| F00y4                | All            | Meningitis due to klebsiella pneumoniae                    |
| F00y5                | All            | Meningitis due to proteus morgani                          |
| F00y6                | All            | Meningitis due to pseudomonas                              |
| F00yz                | All            | Other specified bacterial meningitis NOS                   |
| F00z.                | All            | Bacterial meningitis NOS                                   |
| F01..                | All            | Meningitis due to other organisms                          |
| F010.                | All            | Meningitis due to fungal organisms                         |
| F0100                | All            | Meningitis due to cryptococcus                             |
| F010z                | All            | Other fungal meningitis                                    |
| F011.                | All            | Meningitis due to viral organisms EC                       |
| F0110                | All            | Meningitis due to coxsackie virus                          |
| F0111                | All            | Meningitis due to ECHO virus                               |
| F0112                | All            | Meningitis due to herpes zoster virus                      |
| F0113                | All            | Meningitis due to herpes simplex virus                     |
| F0114                | All            | Meningitis due to mumps virus                              |
| F0115                | All            | Meningitis due to lymphocytic choriomeningitis virus       |
| F0116                | All            | Meningitis due to adenovirus                               |
| F0117                | All            | Varicella meningitis                                       |

|                       |                |                                                                             |
|-----------------------|----------------|-----------------------------------------------------------------------------|
| F011y                 | All            | Other viral meningitis                                                      |
| F011z                 | All            | Meningitis - viral NOS                                                      |
| F012.                 | All            | Meningitis due to trypanosomiasis                                           |
| F013.                 | All            | Meningitis due to sarcoidosis                                               |
| F01y.                 | All            | Other non-bacterial meningitis                                              |
| F01y0                 | All            | Meningitis due to leptospira                                                |
| F01yz                 | All            | Other non-bacterial meningitis NOS                                          |
| F01z.                 | All            | Meningitis due to organism NOS                                              |
| F02..                 | All            | Meningitis of unspecified cause                                             |
| F020.                 | All            | Nonpyogenic meningitis                                                      |
| F02z.                 | All            | Unspecified meningitis                                                      |
| F03X.                 | All            | Bacterial meningoencephalitis and meningomyelitis, not elsewhere classified |
| A543.                 | 00             | Herpetic meningoencephalitis                                                |
| AD00.                 | 00             | Toxoplasma meningoencephalitis                                              |
| A1303                 | 00             | Tuberculous meningoencephalitis                                             |
| A1302                 | 00             | Tuberculous leptomeningitis                                                 |
| <b>Read CTV3 Code</b> | <b>Term ID</b> | <b>Description</b>                                                          |
| X000H                 | All            | Meningitis                                                                  |
| XaDmS                 | All            | Infective meningitis                                                        |
| F00..                 | All            | Bacterial meningitis                                                        |
| F0077                 | All            | Actinomycotic meningitis                                                    |
| F00y0                 | All            | Aerobacter meningitis                                                       |
| F00y2                 | All            | Escherichia coli meningitis                                                 |
| F0070                 | All            | Gonococcal meningitis                                                       |
| F000.                 | All            | Haemophilus meningitis                                                      |
| F00y4                 | All            | Klebsiella meningitis                                                       |
| F00y3                 | All            | Meningitis due to Friedlander bacillus                                      |
| F0071                 | All            | Listeria meningitis                                                         |
| X000R                 | All            | Meningitis in Lyme disease                                                  |
| F005.                 | All            | Meningococcal meningitis                                                    |
| F0078                 | All            | Meningitis due to pertussis                                                 |
| A206.                 | All            | Plague meningitis                                                           |
| F001.                 | All            | Pneumococcal meningitis                                                     |
| Xa9B4                 | All            | Proteus meningitis                                                          |
| F00y6                 | All            | Pseudomonas meningitis                                                      |
| F00y1                 | All            | Meningitis due to bacillus pyocyaneus                                       |
| F0073                 | All            | Salmonella meningitis                                                       |
| F0076                 | All            | Meningitis due to typhoid fever                                             |
| F003.                 | All            | Staphylococcal meningitis                                                   |
| X000P                 | All            | Staphylococcus aureus meningitis                                            |
| X000Q                 | All            | Staphylococcus epidermidis meningitis                                       |
| F002.                 | All            | Streptococcal meningitis                                                    |
| Xa7pz                 | All            | Syphilitic meningitis                                                       |
| F0074                 | All            | Congenital syphilitic meningitis                                            |

|       |     |                                                            |
|-------|-----|------------------------------------------------------------|
| X000T | All | Late congenital syphilitic meningitis                      |
| F0075 | All | Secondary syphilitic meningitis                            |
| A9180 | All | Acute secondary syphilitic meningitis                      |
| F004. | All | Tuberculous meningitis                                     |
| A1300 | All | Tuberculosis of cerebral meninges                          |
| A1301 | All | Tuberculosis of spinal meninges                            |
| A1302 | All | Tuberculous leptomeningitis                                |
| A130z | All | Tuberculous meningitis NOS                                 |
| AA0y0 | All | Leptospiral meningitis                                     |
| F007. | All | Meningitis in other bacterial disease classified elsewhere |
| F0072 | All | Meningitis due to neurosyphilis                            |
| F007z | All | Unspecified meningitis in bacterial disease EC             |
| F00y. | All | Other specified bacterial meningitis                       |
| F00yz | All | Other specified bacterial meningitis NOS                   |
| F00y5 | All | Morganella morganii meningitis                             |
| F00z. | All | Bacterial meningitis NOS                                   |
| Fyu00 | All | [X]Other bacterial meningitis                              |
| Xa9B5 | All | Viral meningitis                                           |
| A4z1. | All | Adenoviral meningitis                                      |
| A4z0. | All | Lymphocytic choriomeningitis                               |
| F0114 | All | Mumps meningitis                                           |
| X000M | All | Postmeasles meningitis                                     |
| F0112 | All | Meningitis due to herpes zoster virus                      |
| F0113 | All | Herpes simplex meningitis                                  |
| A42.. | All | Enteroviral meningitis                                     |
| F0110 | All | Coxsackie viral meningitis                                 |
| X000J | All | Coxsackie A viral meningitis                               |
| X000K | All | Coxsackie B viral meningitis                               |
| F0111 | All | Echovirus meningitis                                       |
| X000L | All | Chronic echovirus meningoencephalitis                      |
| A42y. | All | Other specified viral meningitis                           |
| Ayu8C | All | [X]Other viral meningitis                                  |
| Ayu8D | All | [X]Viral meningitis, unspecified                           |
| F011. | All | Meningitis due to viral organisms EC                       |
| F011y | All | Other viral meningitis                                     |
| Fyu01 | All | [X]Meningitis in viral diseases classified elsewhere       |
| XE0R7 | All | Viral meningitis NOS                                       |
| XE15A | All | Meningitis - viral NOS                                     |
| F010. | All | Fungal meningitis                                          |
| AB2y2 | All | Candidal meningitis                                        |
| F0100 | All | Cryptococcal meningitis                                    |
| AB32. | All | Coccidioidal meningitis                                    |
| F010z | All | Other fungal meningitis                                    |
| Fyu02 | All | [X]Meningitis in mycoses classified elsewhere              |



|       |       |                                                                                         |
|-------|-------|-----------------------------------------------------------------------------------------|
| X000V | All   | Parasitic meningitis                                                                    |
| F012. | All   | Meningitis due to trypanosomiasis                                                       |
| F01.. | All   | Meningitis due to other organisms                                                       |
| F01y. | All   | Other non-bacterial meningitis                                                          |
| F01yz | All   | Other non-bacterial meningitis NOS                                                      |
| F01z. | All   | Meningitis due to organism NOS                                                          |
| Fyu03 | All   | [X]Meningitis in other specified infectious and parasitic diseases classified elsewhere |
| F02.. | All   | Meningitis of unspecified cause                                                         |
| F020. | All   | Non-pyogenic meningitis                                                                 |
| F02z. | All   | Unspecified meningitis                                                                  |
| Fyu04 | All   | [X]Meningitis due to other specified causes                                             |
| X001F | All   | Listeria meningoencephalitis                                                            |
| XE0RD | All   | Herpetic meningoencephalitis                                                            |
| F0334 | Y71kx | Toxoplasma meningoencephalitis                                                          |
| A1303 | All   | Tuberculous meningoencephalitis                                                         |
| X001N | Y00Ck | PAM - Primary amoebic meningoencephalitis                                               |
| Fyu05 | YMACn | [X]Bacterial meningoencephalitis and meningomyelitis, not elsewhere classified          |

## References

1. Abuabara K, Magyari AM, Hoffstad O, Jabbar-Lopez ZK, Smeeth L, Williams HC, et al. Development and Validation of an Algorithm to Accurately Identify Atopic Eczema Patients in Primary Care Electronic Health Records from the UK. *Journal of Investigative Dermatology*. 2017;137(8):1655-62.
2. Hoang U, Liyanage H, Coyle R, Godden C, Jones S, Blair M, et al. Determinants of inter-practice variation in childhood asthma and respiratory infections: cross-sectional study of a national sentinel network. *BMJ open*. 2019;9(1):e024372-e.
3. McGovern A, Hinton W, Correa A, Munro N, Whyte M, de Lusignan S. Real-world evidence studies into treatment adherence, thresholds for intervention and disparities in treatment in people with type 2 diabetes in the UK. *BMJ open*. 2016;6(11):e012801.
4. Muller S, Hider SL, Raza K, Stack RJ, Hayward RA, Mallen CD. An algorithm to identify rheumatoid arthritis in primary care: a Clinical Practice Research Datalink study. *BMJ open*. 2015;5(12):e009309.
